# Supplementary material for: LncRNA-mRNA Expression Profiles of Osteoclast After Conditional Knockout HIF-1α
Source: Front Genet. 2022 Jun 21;13:909095. doi: 10.3389/fgene.2022.909095 (PMC9253292; doi:10.3389/fgene.2022.909095)
Supplement: Supplementary file 1 [file Table2.XLSX]

## Sheet: Sheet1
id	baseMean	baseMean_Ctrl	baseMean_Cko	foldChange(Cko/Ctrl)(Cko/Ctrl)	log2FoldChange	pval	padj	Chromosome	Start Site	End Site	Direction	Length	Name	GO	KEGG	Description
MGP_C57BL6NJ_G0031142	476.562	11.5533	941.571	81.4977	6.34869	2.61984e-13	3.95754e-09	6	48757580	48765091	+	1837	Gimap4	GO:0000166;GO:0005525;GO:0005525;GO:0005525;GO:0005737;GO:0005829;GO:0005829;GO:0005829;	-	GTPase, IMAP family member 4 [Source:MGISymbol;Acc:MGI:1349656]
MGP_C57BL6NJ_G0019456	117.762	2.61911	232.905	88.9252	6.47452	2.55798e-10	1.93204e-06	11	104099537	104191651	-	8754	Ikzf3	GO:0000977;GO:0000977;GO:0001228;GO:0001228;GO:0003676;GO:0003677;GO:0003700;GO:0005515;GO:0005515;GO:0005634;GO:0005634;GO:0005634;GO:0005654;GO:0005654;GO:0005737;GO:0005737;GO:0005737;GO:0005829;GO:0005886;GO:0006351;GO:0006355;GO:0006366;GO:0009617;GO:0009617;GO:0030888;GO:0030888;GO:0042113;GO:0042802;GO:0042803;GO:0042803;GO:0042981;GO:0042981;GO:0043565;GO:0043565;GO:0044212;GO:0045577;GO:…	K09220	IKAROS family zinc finger 3 [Source:MGISymbol;Acc:MGI:1342542]
MGP_C57BL6NJ_G0034451	809.238	1567.68	50.7931	0.0324001	-4.94786	9.25381e-10	4.6596e-06	8	99046767	99048306	+	536	Mt3	GO:0000060;GO:0001666;GO:0001934;GO:0005507;GO:0005622;GO:0005634;GO:0005634;GO:0005737;GO:0005829;GO:0006112;GO:0006112;GO:0006707;GO:0006707;GO:0006829;GO:0006829;GO:0006875;GO:0006875;GO:0006882;GO:0006882;GO:0006882;GO:0006915;GO:0006979;GO:0006979;GO:0008021;GO:0008021;GO:0008144;GO:0008270;GO:0008270;GO:0010273;GO:0010507;GO:0010507;GO:0010628;GO:0010628;GO:0010940;GO:0010942;GO:0010942;GO:…	-	metallothionein 3 [Source:MGISymbol;Acc:MGI:97173]
MGP_C57BL6NJ_G0017505	45.9333	0	91.8666	Inf	Inf	1.78808e-09	6.03744e-06	10	27615232	27842609	+	9031	Themis	GO:0002250;GO:0002376;GO:0005515;GO:0005515;GO:0005634;GO:0005634;GO:0005737;GO:0005737;GO:0005911;GO:0005911;GO:0007275;GO:0008180;GO:0008180;GO:0043368;GO:0043368;GO:0043383;GO:0043383;GO:0050852;GO:0050852;	-	thymocyte selection associated [Source:MGISymbol;Acc:MGI:2443552]
MGP_C57BL6NJ_G0019926	45.5205	0	91.041	Inf	Inf	1.99836e-09	6.03744e-06	11	129368136	129370805	-	1133	Cd7	GO:0002250;GO:0002250;GO:0002376;GO:0016020;GO:0016021;GO:0016021;GO:0038023;GO:0048873;GO:0048873;GO:0070062;	K06457	CD7 antigen [Source:MGI Symbol;Acc:MGI:88344]"
MGP_C57BL6NJ_G0031148	131.635	5.69153	257.578	45.2564	5.50005	2.86284e-09	7.16638e-06	6	48849065	48855493	-	2577	Gimap3	GO:0000166;GO:0005515;GO:0005525;GO:0005525;GO:0005525;GO:0005525;GO:0005525;GO:0005739;GO:0005739;GO:0005739;GO:0005741;GO:0005741;GO:0005741;GO:0005783;GO:0016020;GO:0016021;GO:0033955;GO:0033955;	-	GTPase, IMAP family member 3 [Source:MGISymbol;Acc:MGI:1932723]
MGP_C57BL6NJ_G0030138	337.727	22.8536	652.601	28.5556	4.8357	3.32084e-09	7.16638e-06	5	93157653	93167143	-	2517	Jchain	GO:0019862;GO:0030674;GO:0034987;GO:0071750;	-	immunoglobulin joining chain [Source:MGISymbol;Acc:MGI:96493]
MGP_C57BL6NJ_G0032328	269.331	523.069	15.5935	0.0298115	-5.06799	4.18968e-09	7.91116e-06	7	25131177	25148273	-	4938	Cyp2s1	GO:0004497;GO:0005506;GO:0005737;GO:0005783;GO:0005783;GO:0005789;GO:0006082;GO:0006805;GO:0008392;GO:0008395;GO:0016020;GO:0016021;GO:0016491;GO:0016705;GO:0016712;GO:0016712;GO:0019373;GO:0020037;GO:0020037;GO:0031090;GO:0042738;GO:0043231;GO:0043231;GO:0043231;GO:0046872;GO:0055114;GO:0055114;GO:0055114;GO:0070330;	-	cytochrome P450, family 2, subfamily s, polypeptide1 [Source:MGI Symbol;Acc:MGI:1921384]
MGP_C57BL6NJ_G0024870	279.249	17.7846	540.714	30.4035	4.92617	6.19159e-09	1.03922e-05	18	61664972	61697157	+	2645	Gm4951	GO:0003924;GO:0005525;GO:0005789;GO:0006952;GO:0016020;GO:0035458;GO:0035458;GO:0035458;	-	predicted gene 4951 [Source:MGISymbol;Acc:MGI:3644953]
MGP_C57BL6NJ_G0036647	50.0448	100.09	0	0	-Inf	9.04427e-09	1.36623e-05	X	145312772	145337917	-	7795	Capn6	GO:0001578;GO:0001578;GO:0004198;GO:0004198;GO:0005515;GO:0005622;GO:0005737;GO:0005737;GO:0005819;GO:0005829;GO:0005856;GO:0005874;GO:0005874;GO:0005876;GO:0006508;GO:0006508;GO:0008017;GO:0008017;GO:0048471;GO:0048471;GO:0051493;GO:0051493;GO:0051493;	K08575	calpain 6 [Source:MGI Symbol;Acc:MGI:1100850]"
MGP_C57BL6NJ_G0031985	51.5141	0.625996	102.402	163.583	7.35388	1.14261e-08	1.56911e-05	7	1265620	1274762	+	1540	Ncr1	GO:0016020;GO:0016021;	K06741	natural cytotoxicity triggering receptor 1[Source:MGI Symbol;Acc:MGI:1336212]
MGP_C57BL6NJ_G0035217	76.1689	2.50399	149.834	59.8381	5.90299	1.39038e-08	1.75026e-05	9	44785235	44796455	-	1070	Cd3g	GO:0002250;GO:0002376;GO:0004888;GO:0004888;GO:0004888;GO:0004888;GO:0005515;GO:0007163;GO:0007163;GO:0007166;GO:0007166;GO:0007166;GO:0007166;GO:0009897;GO:0015031;GO:0015031;GO:0016020;GO:0016020;GO:0016021;GO:0030217;GO:0042105;GO:0042105;GO:0042105;GO:0042803;GO:0045059;GO:0046982;GO:0046982;GO:0051260;GO:0070228;GO:0070228;	K06452	CD3 antigen, gamma polypeptide [Source:MGISymbol;Acc:MGI:88333]
MGP_C57BL6NJ_G0020091	278.269	537.459	19.0791	0.0354986	-4.81609	1.62091e-08	1.8835e-05	12	39617129	39697106	-	3007	Scin	GO:0002102;GO:0003779;GO:0005509;GO:0005737;GO:0005856;GO:0005886;GO:0005903;GO:0008285;GO:0030054;GO:0032330;GO:0032991;GO:0042989;GO:0042995;GO:0043065;GO:0045654;GO:0046872;GO:0051014;GO:0051014;GO:0051015;GO:0051127;GO:0051693;GO:0051693;GO:0070062;GO:0005903;	-	scinderin [Source:MGI Symbol;Acc:MGI:1306794]"
MGP_C57BL6NJ_G0035219	63.4827	1.87799	125.087	66.6071	6.0576	3.2054e-08	3.45862e-05	9	44815479	44826326	-	1436	Cd3e	GO:0001772;GO:0001772;GO:0001954;GO:0001954;GO:0002250;GO:0002376;GO:0002669;GO:0002669;GO:0004871;GO:0004871;GO:0004888;GO:0004888;GO:0005515;GO:0005886;GO:0005886;GO:0005886;GO:0005886;GO:0005911;GO:0005911;GO:0007166;GO:0007166;GO:0007166;GO:0007166;GO:0007584;GO:0009897;GO:0009897;GO:0009897;GO:0010628;GO:0010629;GO:0016020;GO:0016020;GO:0016021;GO:0016358;GO:0016358;GO:0017124;GO:0021549;GO:…	K06451	CD3 antigen, epsilon polypeptide [Source:MGISymbol;Acc:MGI:88332]
MGP_C57BL6NJ_G0035990	1646.47	175.528	3117.42	17.7602	4.15058	4.40215e-08	4.43326e-05	9	130695430	130722533	+	3704	Ccr5	GO:0003779;GO:0004871;GO:0004930;GO:0004930;GO:0004950;GO:0005737;GO:0005737;GO:0005768;GO:0005886;GO:0006816;GO:0006935;GO:0006935;GO:0006952;GO:0006952;GO:0006954;GO:0006954;GO:0006955;GO:0006955;GO:0007165;GO:0007186;GO:0007186;GO:0007186;GO:0007204;GO:0007204;GO:0007267;GO:0009897;GO:0009897;GO:0009897;GO:0009986;GO:0009986;GO:0010628;GO:0014808;GO:0016020;GO:0016021;GO:0016021;GO:0016493;GO:…	K04180	chemokine (C-C motif) receptor 5 [Source:MGISymbol;Acc:MGI:107182]
MGP_C57BL6NJ_G0031140	33.376	0	66.7519	Inf	Inf	6.88796e-08	6.50309e-05	6	48715688	48727621	+	2067	Gimap8	GO:0000166;GO:0003674;GO:0005525;GO:0005525;GO:0005525;GO:0005737;GO:0005739;GO:0005783;GO:0005794;GO:0005829;GO:0070232;GO:0070232;	-	GTPase, IMAP family member 8 [Source:MGISymbol;Acc:MGI:2685303]
MGP_C57BL6NJ_G0016359	77.0276	3.48954	150.566	43.1478	5.43121	8.24051e-08	6.93258e-05	1	40872975	40912268	+	4779	Il18r1	GO:0005515;GO:0006954;GO:0007165;GO:0016020;GO:0016021;GO:0030101;GO:0032729;GO:0032729;GO:0035655;GO:0035655;GO:0042007;GO:0042007;GO:0042008;GO:0042346;GO:0045063;GO:0051092;GO:0051092;GO:0120163;GO:1901224;GO:2000556;GO:2000556;GO:0030101;GO:0032729;GO:0035655;GO:0042008;GO:0042346;GO:0045063;GO:0120163;GO:1901224;	-	interleukin 18 receptor 1 [Source:MGISymbol;Acc:MGI:105383]
MGP_C57BL6NJ_G0028165	40.1697	80.3394	0	0	-Inf	8.26072e-08	6.93258e-05	3	113048901	113098982	-	10270	Slc6a17	GO:0003333;GO:0005328;GO:0005887;GO:0005887;GO:0006810;GO:0006836;GO:0006836;GO:0007420;GO:0007420;GO:0008021;GO:0008021;GO:0008021;GO:0015171;GO:0015293;GO:0015804;GO:0015804;GO:0015816;GO:0015816;GO:0015816;GO:0015820;GO:0015820;GO:0015820;GO:0015824;GO:0015824;GO:0015824;GO:0016020;GO:0016020;GO:0016021;GO:0016021;GO:0030054;GO:0030285;GO:0030672;GO:0031410;GO:0032328;GO:0032328;GO:0032328;GO:…	K05048	solute carrier family 6 (neurotransmittertransporter), member 17 [Source:MGISymbol;Acc:MGI:2442535]
MGP_C57BL6NJ_G0031790	57.1232	2.19099	112.055	51.1438	5.67649	1.88683e-07	0.000150013	6	136762984	136771260	+	1281	Klrd1	GO:0002228;GO:0009897;GO:0016020;GO:0016021;GO:0023024;GO:0023030;GO:0030246;GO:0043235;GO:1990405;GO:0009897;	K06516	killer cell lectin-like receptor, subfamily D,member 1 [Source:MGI Symbol;Acc:MGI:1196275]
MGP_C57BL6NJ_G0030249	766.081	91.3917	1440.77	15.7648	3.97863	2.35152e-07	0.000177611	5	111085568	111143920	-	3550	Abcg3	GO:0000166;GO:0005524;GO:0005524;GO:0005886;GO:0006810;GO:0006855;GO:0006855;GO:0015238;GO:0016020;GO:0016020;GO:0016021;GO:0016021;GO:0016324;GO:0016887;GO:0017127;GO:0033344;GO:0042626;GO:0043235;GO:0055085;	K05682	ATP-binding cassette, sub-family G (WHITE), member3 [Source:MGI Symbol;Acc:MGI:1351624]
MGP_C57BL6NJ_G0025122	34.448	0.312998	68.5829	219.116	7.77555	2.79245e-07	0.00020087	19	2490069	2493327	-	1232	Ctsw	GO:0004197;GO:0005615;GO:0005764;GO:0006508;GO:0006508;GO:0008233;GO:0008234;GO:0008234;GO:0016020;GO:0016787;GO:0051603;	K08569	cathepsin W [Source:MGI Symbol;Acc:MGI:1338045]"
MGP_C57BL6NJ_G0031791	62.2156	3.12998	121.301	38.7546	5.2763	3.51133e-07	0.0002411	6	136782712	136799192	-	7183	Klrk1	GO:0002223;GO:0002223;GO:0002250;GO:0002376;GO:0002860;GO:0002860;GO:0005515;GO:0005515;GO:0005515;GO:0005886;GO:0005886;GO:0007165;GO:0009897;GO:0009897;GO:0009986;GO:0009986;GO:0016020;GO:0016021;GO:0019900;GO:0030101;GO:0030101;GO:0030154;GO:0030246;GO:0030887;GO:0030887;GO:0032394;GO:0032394;GO:0032729;GO:0032729;GO:0034260;GO:0038023;GO:0042267;GO:0042288;GO:0042288;GO:0042803;GO:0042803;GO:…	K06728	killer cell lectin-like receptor subfamily K,member 1 [Source:MGI Symbol;Acc:MGI:1196250]
MGP_C57BL6NJ_G0021185	423.307	798.074	48.5397	0.060821	-4.03929	4.35418e-07	0.000285975	13	92773148	93328766	+	13615	Edil3	GO:0005178;GO:0005509;GO:0005576;GO:0007155;GO:0007275;GO:0010811;GO:0031012;GO:0046872;GO:0070062;GO:1903561;GO:0010811;	-	EGF-like repeats and discoidin I-like domains 3[Source:MGI Symbol;Acc:MGI:1329025]
MGP_C57BL6NJ_G0016531	174.324	332.149	16.4986	0.0496724	-4.33141	4.83351e-07	0.000304229	1	77612995	77638551	+	1692	Rufy4	GO:0000045;GO:0003674;GO:0005515;GO:0005575;GO:0005776;GO:0008150;GO:0016239;GO:0032266;GO:0046872;GO:0071353;GO:0071353;	-	RUN and FYVE domain containing 4 [Source:MGISymbol;Acc:MGI:3588214]
MGP_C57BL6NJ_G0025757	35.9522	0.455704	71.4487	156.787	7.29267	5.79515e-07	0.000343934	2	8797431	8941146	+	6353	Prkcq	GO:0001772;GO:0004697;GO:0005737;GO:0005886;GO:0006355;GO:0006468;GO:0006509;GO:0032740;GO:0032753;GO:0035556;GO:0042102;GO:0045086;GO:0050870;GO:0051092;GO:0090330;GO:2000318;GO:2000570;	K18052	protein kinase C, theta [Source:MGISymbol;Acc:MGI:97601]
MGP_C57BL6NJ_G0031774	32.0371	0.227852	63.8463	280.21	8.13036	5.91969e-07	0.000343934	6	136016388	136028185	+	3110	Clec2i	GO:0001765;GO:0004888;GO:0005515;GO:0005886;GO:0009897;GO:0009986;GO:0016020;GO:0016021;GO:0030246;GO:0030246;GO:0030833;GO:0042129;GO:0043113;GO:0045076;GO:0045671;GO:0046703;GO:0050852;GO:2000522;	-	C-type lectin domain family 2, member i [Source:MGISymbol;Acc:MGI:2136650]
MGP_C57BL6NJ_G0020484	42.3509	0.996554	83.7052	83.9947	6.39223	6.28704e-07	0.000351748	12	113353436	113458930	-	8103	Bcl11b	GO:0000978;GO:0000978;GO:0001077;GO:0001077;GO:0001077;GO:0003334;GO:0003334;GO:0003382;GO:0003382;GO:0003676;GO:0003700;GO:0005515;GO:0005622;GO:0005622;GO:0005634;GO:0005634;GO:0005634;GO:0005634;GO:0006351;GO:0006355;GO:0006355;GO:0006366;GO:0007165;GO:0007409;GO:0007409;GO:0008285;GO:0008285;GO:0009791;GO:0009791;GO:0010468;GO:0010468;GO:0010837;GO:0010837;GO:0019216;GO:0019216;GO:0021773;GO:…	K22046	B cell leukemia/lymphoma 11B [Source:MGISymbol;Acc:MGI:1929913]
MGP_C57BL6NJ_G0025295	137.512	13.4334	261.59	19.4731	4.28341	7.18425e-07	0.00037791	19	9234360	9294563	+	5182	Ms4a4b	GO:0005887;	K22190	membrane-spanning 4-domains, subfamily A, member 4B[Source:MGI Symbol;Acc:MGI:1913083]
MGP_C57BL6NJ_G0019403	67.5278	4.38198	130.674	29.8207	4.89824	7.25499e-07	0.00037791	11	101878072	102186900	+	7462	Skap1	GO:0002250;GO:0002376;GO:0002757;GO:0005070;GO:0005515;GO:0005634;GO:0005634;GO:0005737;GO:0005737;GO:0005737;GO:0005829;GO:0005829;GO:0005886;GO:0005886;GO:0005886;GO:0005886;GO:0005911;GO:0005911;GO:0009967;GO:0016020;GO:0019901;GO:0019903;GO:0042101;GO:0042101;GO:0042169;GO:0044877;GO:0045785;GO:0045785;GO:0045893;GO:0045944;GO:0050852;GO:0072659;GO:0072659;	K17699	src family associated phosphoprotein 1 [Source:MGISymbol;Acc:MGI:1925723]
MGP_C57BL6NJ_G0023274	37.576	0.938995	74.213	79.0345	6.30441	9.88123e-07	0.000497553	16	45864899	45949040	-	2184	Cd96	GO:0002534;GO:0002534;GO:0002728;GO:0002728;GO:0005515;GO:0005737;GO:0005912;GO:0007155;GO:0007160;GO:0016020;GO:0016021;GO:0032496;GO:0032496;GO:0032689;GO:0032689;	K06517	CD96 antigen [Source:MGI Symbol;Acc:MGI:1934368]"
MGP_C57BL6NJ_G0035373	331.608	620.768	42.4478	0.0683794	-3.87029	1.36074e-06	0.000663076	9	58779990	58802730	+	3296	Sema7a	GO:0001649;GO:0001755;GO:0001934;GO:0001934;GO:0005178;GO:0005178;GO:0005178;GO:0005615;GO:0005886;GO:0005886;GO:0005887;GO:0006954;GO:0007229;GO:0007229;GO:0007229;GO:0007229;GO:0007275;GO:0007399;GO:0009897;GO:0009897;GO:0009897;GO:0016020;GO:0016020;GO:0021988;GO:0021988;GO:0030154;GO:0030215;GO:0030335;GO:0031175;GO:0031175;GO:0031225;GO:0038191;GO:0045499;GO:0045773;GO:0045773;GO:0045773;GO:…	K06529	sema domain, immunoglobulin domain (Ig), and GPImembrane anchor, (semaphorin) 7A [Source:MGISymbol;Acc:MGI:1306826]
MGP_C57BL6NJ_G0030178	127.606	13.0215	242.189	18.5991	4.21716	1.44623e-06	0.00068271	5	97213374	97220106	-	3016	Cxcl9	GO:0002690;GO:0005125;GO:0005576;GO:0005576;GO:0005615;GO:0005615;GO:0005615;GO:0005615;GO:0005622;GO:0006935;GO:0006935;GO:0006952;GO:0006954;GO:0006954;GO:0006954;GO:0006955;GO:0006955;GO:0007186;GO:0007189;GO:0008009;GO:0008009;GO:0008009;GO:0009617;GO:0009617;GO:0009897;GO:0009897;GO:0010469;GO:0010818;GO:0030593;GO:0030595;GO:0030816;GO:0032496;GO:0042127;GO:0042127;GO:0043950;GO:0045663;GO:…	K05416	chemokine (C-X-C motif) ligand 9 [Source:MGISymbol;Acc:MGI:1352449]
MGP_C57BL6NJ_G0028397	590.541	90.6574	1090.42	12.028	3.58832	1.78098e-06	0.000815259	3	160694446	160714640	-	6129	Ifi44	GO:0003674;GO:0005737;GO:0006955;GO:0008150;GO:0009617;GO:0009617;	-	interferon-induced protein 44 [Source:MGISymbol;Acc:MGI:2443016]
MGP_C57BL6NJ_G0024873	106.821	10.2762	203.366	19.79	4.3067	1.8661e-06	0.000829097	18	61839663	61858320	+	3121	Iigp1	GO:0000166;GO:0002376;GO:0003924;GO:0003924;GO:0003924;GO:0005515;GO:0005525;GO:0005525;GO:0005525;GO:0005634;GO:0005737;GO:0005783;GO:0005789;GO:0005789;GO:0005794;GO:0006952;GO:0009617;GO:0010506;GO:0016020;GO:0016020;GO:0016787;GO:0019003;GO:0019003;GO:0019221;GO:0020005;GO:0031965;GO:0032580;GO:0035458;GO:0035458;GO:0042802;GO:0042802;GO:0042832;GO:0045087;GO:0050829;GO:0003924;GO:0005525;GO:…	-	interferon inducible GTPase 1 [Source:MGISymbol;Acc:MGI:1926259]
MGP_C57BL6NJ_G0035291	50.0982	2.81698	97.3794	34.5687	5.11139	2.05851e-06	0.0008737	9	51543636	51571139	+	2566	Pou2af1	GO:0000978;GO:0000979;GO:0001105;GO:0003677;GO:0003677;GO:0003713;GO:0005515;GO:0005634;GO:0006351;GO:0006355;GO:0006366;GO:0045944;GO:0090575;	-	POU domain, class 2, associating factor 1[Source:MGI Symbol;Acc:MGI:105086]
MGP_C57BL6NJ_G0033073	432.295	64.2455	800.344	12.4576	3.63895	2.08217e-06	0.0008737	7	108798059	108804668	-	1079	Folr2	GO:0005542;GO:0005542;GO:0005542;GO:0005622;GO:0005886;GO:0006620;GO:0006810;GO:0007155;GO:0007342;GO:0008144;GO:0008284;GO:0008517;GO:0008517;GO:0009986;GO:0015884;GO:0015884;GO:0015884;GO:0016020;GO:0031225;GO:0031362;GO:0031362;GO:0031362;GO:0035036;GO:0038023;GO:0051870;GO:0061714;GO:0061714;GO:0061714;GO:0071231;GO:1904447;	K13649	folate receptor 2 (fetal) [Source:MGISymbol;Acc:MGI:95569]
MGP_C57BL6NJ_G0033244	51.443	100.714	2.17164	0.0215624	-5.53534	2.19329e-06	0.000882994	7	113069577	113071167	-	1035	Prkcdbp	GO:0005080;GO:0005080;GO:0005080;GO:0005080;GO:0005515;GO:0005515;GO:0005737;GO:0005737;GO:0005737;GO:0005829;GO:0005901;GO:0005901;GO:0005901;GO:0005901;GO:0005901;GO:0016020;GO:0030866;GO:0030866;GO:0032922;GO:0032922;GO:0032991;GO:0043234;GO:0048511;GO:0051898;GO:0051898;GO:0070374;GO:0070374;GO:1901003;GO:1901003;	-	protein kinase C, delta binding protein [Source:MGISymbol;Acc:MGI:1923422]
MGP_C57BL6NJ_G0025418	75.8504	146.545	5.15537	0.0351794	-4.82913	2.24433e-06	0.000882994	19	24243106	24454077	+	6166	Kank1	GO:0005634;GO:0005737;GO:0005737;GO:0005886;GO:0008013;GO:0010977;GO:0030177;GO:0030336;GO:0030837;GO:0030837;GO:0032587;GO:0035024;GO:0035413;GO:0046627;GO:0090263;GO:0090303;GO:1900025;GO:1900028;GO:2000114;GO:2000393;	K22808	KN motif and ankyrin repeat domains 1 [Source:MGISymbol;Acc:MGI:2147707]
MGP_C57BL6NJ_G0020589	243.895	456.517	31.2716	0.0685004	-3.86774	2.3181e-06	0.000882994	13	687467	705424	-	1207	Akr1c18	GO:0000060;GO:0001758;GO:0004032;GO:0004032;GO:0004033;GO:0004745;GO:0005622;GO:0005634;GO:0005737;GO:0005737;GO:0005829;GO:0006693;GO:0006709;GO:0007186;GO:0007567;GO:0008106;GO:0008202;GO:0008284;GO:0010942;GO:0016229;GO:0016488;GO:0016491;GO:0016491;GO:0016491;GO:0016655;GO:0018636;GO:0034614;GO:0035410;GO:0042448;GO:0042448;GO:0042574;GO:0044597;GO:0044597;GO:0044598;GO:0044598;GO:0045550;GO:…	-	aldo-keto reductase family 1, member C18[Source:MGI Symbol;Acc:MGI:2145420]
MGP_C57BL6NJ_G0019232	392.135	58.2933	725.977	12.4539	3.63852	2.33813e-06	0.000882994	11	86976960	86982781	+	1864	Slfn1	GO:0000122;GO:0000122;GO:0001933;GO:0001933;GO:0005515;GO:0005524;GO:0005634;GO:0005634;GO:0005737;GO:0005737;GO:0007050;GO:0007050;GO:0008285;GO:0008285;GO:0042130;GO:0042130;GO:1900477;GO:1900477;GO:2000134;GO:2000134;	-	schlafen 1 [Source:MGI Symbol;Acc:MGI:1313259]"
MGP_C57BL6NJ_G0033918	23.4622	0	46.9244	Inf	Inf	2.51878e-06	0.000911063	8	19277277	19279115	-	375	Gm15056	-	-	predicted gene 15056 [Source:MGISymbol;Acc:MGI:3705859]
MGP_C57BL6NJ_G0035717	660.992	101.69	1220.29	12.0001	3.58498	2.59448e-06	0.000911063	9	110969073	110973358	+	3478	Tlr9	GO:0001774;GO:0001816;GO:0001816;GO:0001932;GO:0001932;GO:0002218;GO:0002218;GO:0002224;GO:0002224;GO:0002237;GO:0002237;GO:0002376;GO:0002639;GO:0002639;GO:0002730;GO:0002730;GO:0002755;GO:0002755;GO:0002755;GO:0004888;GO:0005149;GO:0005149;GO:0005515;GO:0005515;GO:0005515;GO:0005578;GO:0005615;GO:0005737;GO:0005764;GO:0005764;GO:0005768;GO:0005768;GO:0005783;GO:0005783;GO:0005789;GO:0005886;GO:…	K10161	toll-like receptor 9 [Source:MGISymbol;Acc:MGI:1932389]
MGP_C57BL6NJ_G0033337	411.256	763.435	59.0772	0.0773834	-3.69183	2.61255e-06	0.000911063	7	117638788	117739961	-	4526	St5	GO:0005085;GO:0005575;GO:0017112;GO:0017112;GO:0065009;GO:0070374;	K20161	suppression of tumorigenicity 5 [Source:MGISymbol;Acc:MGI:108517]
MGP_C57BL6NJ_G0017215	996.754	164.82	1828.69	11.0951	3.47185	2.6537e-06	0.000911063	1	185766457	186008411	-	4825	Ifi203	-	-	interferon activated gene 203 [Source:MGISymbol;Acc:MGI:96428]
MGP_C57BL6NJ_G0018587	57.0463	4.06898	110.024	27.0396	4.757	2.82318e-06	0.000947709	11	46583740	46652304	-	5354	Itk	GO:0000166;GO:0001816;GO:0001816;GO:0001865;GO:0001865;GO:0001865;GO:0002250;GO:0002250;GO:0002250;GO:0002376;GO:0004672;GO:0004713;GO:0004713;GO:0004715;GO:0004715;GO:0004715;GO:0005515;GO:0005515;GO:0005524;GO:0005524;GO:0005634;GO:0005634;GO:0005737;GO:0005829;GO:0005911;GO:0005911;GO:0006468;GO:0006468;GO:0006468;GO:0007169;GO:0007202;GO:0007202;GO:0016301;GO:0016310;GO:0016740;GO:0018108;GO:…	K07363	IL2 inducible T cell kinase [Source:MGISymbol;Acc:MGI:96621]
MGP_C57BL6NJ_G0028089	33.535	0.650546	66.4194	102.098	6.67381	3.00295e-06	0.000986143	3	106212093	106224017	-	1741	Cd2	GO:0003823;GO:0005102;GO:0005515;GO:0005576;GO:0005576;GO:0005886;GO:0005911;GO:0005911;GO:0007155;GO:0007155;GO:0009897;GO:0009897;GO:0009898;GO:0009898;GO:0009986;GO:0016020;GO:0016021;GO:0016021;GO:0019901;GO:0030971;GO:0032760;GO:0032991;GO:0034113;GO:0042110;GO:0042803;GO:0042803;GO:0043621;GO:0045121;GO:0046658;GO:0046658;GO:0098609;GO:1902715;GO:2000484;	K06449	CD2 antigen [Source:MGI Symbol;Acc:MGI:88320]"
MGP_C57BL6NJ_G0036064	258.528	498.616	18.4401	0.0369827	-4.75701	3.23642e-06	0.0010402	X	5327994	5440992	+	7068	Tspan7	-	K06571	tetraspanin 7 [Source:MGI Symbol;Acc:MGI:1298407]"
MGP_C57BL6NJ_G0023770	27.8531	55.7062	0	0	-Inf	3.32833e-06	0.00104745	17	25894624	25900337	-	2114	Msln	GO:0005515;GO:0005576;GO:0005615;GO:0005615;GO:0005615;GO:0005794;GO:0005886;GO:0007155;GO:0007160;GO:0009986;GO:0009986;GO:0016020;GO:0031225;	K20733	mesothelin [Source:MGI Symbol;Acc:MGI:1888992]"
MGP_C57BL6NJ_G0023817	37.7586	74.6586	0.858635	0.0115008	-6.44212	3.48929e-06	0.0010757	17	27271608	27307153	+	6652	Syngap1	GO:0005096;GO:0005096;GO:0005096;GO:0005515;GO:0005515;GO:0005622;GO:0005737;GO:0005886;GO:0007165;GO:0007265;GO:0007265;GO:0007389;GO:0007389;GO:0008542;GO:0008542;GO:0014069;GO:0014069;GO:0016020;GO:0016020;GO:0016020;GO:0016358;GO:0016358;GO:0017124;GO:0019901;GO:0030054;GO:0031235;GO:0043087;GO:0043113;GO:0043113;GO:0043198;GO:0043198;GO:0043408;GO:0043408;GO:0043524;GO:0043524;GO:0043547;GO:…	K17631	synaptic Ras GTPase activating protein 1 homolog(rat) [Source:MGI Symbol;Acc:MGI:3039785]
MGP_C57BL6NJ_G0022785	27.4725	54.9449	0	0	-Inf	3.7017e-06	0.00111836	15	107317273	107339006	+	7059	Krt7	-	-	keratin 7 [Source:MGI Symbol;Acc:MGI:96704]"
MGP_C57BL6NJ_G0026074	165.531	310.825	20.2379	0.0651103	-3.94097	3.78999e-06	0.00112258	2	35203329	35380163	+	8077	Dab2ip	GO:0000122;GO:0000122;GO:0000185;GO:0000185;GO:0001525;GO:0001933;GO:0001933;GO:0002376;GO:0005096;GO:0005096;GO:0005096;GO:0005096;GO:0005123;GO:0005515;GO:0005515;GO:0005737;GO:0005737;GO:0005886;GO:0005886;GO:0006915;GO:0006954;GO:0006986;GO:0007049;GO:0007165;GO:0007252;GO:0007257;GO:0007275;GO:0008285;GO:0008285;GO:0008285;GO:0008625;GO:0010596;GO:0010596;GO:0010633;GO:0010633;GO:0010719;GO:…	K19901	disabled 2 interacting protein [Source:MGISymbol;Acc:MGI:1916851]
MGP_C57BL6NJ_G0027591	48.0309	93.8901	2.17164	0.0231296	-5.43412	4.31781e-06	0.00125432	3	37142039	37146689	+	2905	Spry1	GO:0000132;GO:0001656;GO:0001657;GO:0001759;GO:0001759;GO:0005515;GO:0005654;GO:0005737;GO:0005794;GO:0005829;GO:0005829;GO:0007275;GO:0007275;GO:0008285;GO:0008285;GO:0009966;GO:0016020;GO:0016020;GO:0034260;GO:0040037;GO:0040037;GO:0043407;GO:0043407;GO:0046580;GO:0046580;GO:0046580;GO:0051387;GO:0060449;GO:0070373;GO:0070373;GO:0070373;GO:0000132;GO:0001656;GO:0001657;GO:0001759;GO:0008285;GO:…	K04704	sprouty homolog 1 (Drosophila) [Source:MGISymbol;Acc:MGI:1345139]
MGP_C57BL6NJ_G0016599	440.437	812.481	68.3936	0.0841788	-3.5704	4.8787e-06	0.00139052	1	83704638	83787589	-	8287	Serpine2	GO:0004867;GO:0004867;GO:0004867;GO:0004867;GO:0004867;GO:0005102;GO:0005102;GO:0005539;GO:0005576;GO:0005576;GO:0005576;GO:0005576;GO:0005615;GO:0005615;GO:0005615;GO:0005615;GO:0005615;GO:0005615;GO:0005829;GO:0007275;GO:0007399;GO:0007596;GO:0007596;GO:0008201;GO:0008201;GO:0008285;GO:0008285;GO:0009611;GO:0009611;GO:0010466;GO:0010466;GO:0010466;GO:0010544;GO:0010544;GO:0010544;GO:0010757;GO:…	K16643	serine (or cysteine) peptidase inhibitor, clade E,member 2 [Source:MGI Symbol;Acc:MGI:101780]
MGP_C57BL6NJ_G0023217	1341.02	2452.73	229.303	0.0934885	-3.41907	6.09074e-06	0.00170383	16	37111802	37173461	+	4300	Fstl1	GO:0005509;GO:0005515;GO:0005576;GO:0005615;GO:0005615;GO:0005615;GO:0008201;GO:0042594;GO:0042594;GO:0070062;	-	follistatin-like 1 [Source:MGISymbol;Acc:MGI:102793]
MGP_C57BL6NJ_G0024272	157.639	21.469	293.81	13.6853	3.77456	6.22843e-06	0.00171067	17	51680554	51700081	+	4509	Treml2	GO:0004872;GO:0005886;GO:0007165;GO:0009986;GO:0016020;GO:0016021;GO:0038023;GO:0042110;	K14364	triggering receptor expressed on myeloid cells-like2 [Source:MGI Symbol;Acc:MGI:2147038]
MGP_C57BL6NJ_G0033520	71.0371	7.56952	134.505	17.7692	4.15131	8.73102e-06	0.00235519	7	136658059	136677773	-	2669	Sept1	GO:0007056;GO:0030496;GO:0051311;GO:0072687;	K13737	septin 1 [Source:MGI Symbol;Acc:MGI:1858916]"
MGP_C57BL6NJ_G0019453	25.0056	50.0112	0	0	-Inf	9.13606e-06	0.00242122	11	104040134	104071323	+	5210	Erbb2	GO:0000166;GO:0001042;GO:0001042;GO:0001934;GO:0001934;GO:0004672;GO:0004713;GO:0004713;GO:0004713;GO:0004713;GO:0004714;GO:0004714;GO:0004714;GO:0004714;GO:0004714;GO:0004716;GO:0004888;GO:0004888;GO:0005515;GO:0005515;GO:0005515;GO:0005524;GO:0005524;GO:0005634;GO:0005634;GO:0005737;GO:0005737;GO:0005737;GO:0005737;GO:0005829;GO:0005886;GO:0005886;GO:0005886;GO:0005887;GO:0005902;GO:0006351;GO:…	K05083	erb-b2 receptor tyrosine kinase 2 [Source:MGISymbol;Acc:MGI:95410]
MGP_C57BL6NJ_G0031145	20.2434	0	40.4867	Inf	Inf	9.75257e-06	0.00253573	6	48795884	48801899	+	2325	Gimap7	GO:0003924;GO:0005525;GO:0005525;GO:0005525;GO:0005811;GO:0005829;GO:0005829;GO:0042802;GO:0042803;GO:0043231;GO:0046039;	-	GTPase, IMAP family member 7 [Source:MGISymbol;Acc:MGI:1349657]
MGP_C57BL6NJ_G0023253	89.4453	169.343	9.54745	0.0563793	-4.14869	9.90388e-06	0.00253573	16	44223828	44298408	-	4456	Boc	GO:0005887;GO:0007224;GO:0007411;GO:0016020;GO:0016021;GO:0045663;	K20020	biregional cell adhesion molecule-related/down-regulated by oncogenes (Cdon) binding protein [Source:MGISymbol;Acc:MGI:2151153]
MGP_C57BL6NJ_G0035222	19.8921	0	39.7842	Inf	Inf	1.16048e-05	0.00292169	9	44899387	44928393	+	2457	Amica1	GO:0002376;GO:0005178;GO:0005886;GO:0005886;GO:0005886;GO:0005923;GO:0005923;GO:0007155;GO:0007157;GO:0007157;GO:0016020;GO:0016020;GO:0016021;GO:0016021;GO:0030054;GO:0030593;GO:0035696;GO:0035696;GO:0042803;GO:0042803;GO:0046629;GO:0046629;GO:0046629;GO:0050839;GO:0050900;GO:0060054;GO:0060054;GO:0072672;	-	adhesion molecule, interacts with CXADR antigen 1[Source:MGI Symbol;Acc:MGI:2685484]
MGP_C57BL6NJ_G0017668	335.977	613.717	58.2364	0.0948912	-3.39758	1.32696e-05	0.00328607	10	62163260	62235829	-	5846	Unc5b	GO:0001525;GO:0005042;GO:0005042;GO:0005515;GO:0005515;GO:0005829;GO:0005886;GO:0005886;GO:0006915;GO:0007165;GO:0007275;GO:0007411;GO:0014068;GO:0016020;GO:0016021;GO:0016021;GO:0033564;GO:0033564;GO:0038007;GO:0043524;GO:0045121;GO:0045121;GO:2001240;GO:2001241;	K07521	unc-5 netrin receptor B [Source:MGISymbol;Acc:MGI:894703]
MGP_C57BL6NJ_G0025294	154.991	22.9808	287.001	12.4887	3.64255	1.7209e-05	0.00419289	19	9186485	9208542	+	1625	Ms4a4c	GO:0003674;GO:0005575;GO:0008150;GO:0016020;GO:0016021;GO:0016021;	-	membrane-spanning 4-domains, subfamily A, member 4C[Source:MGI Symbol;Acc:MGI:1927656]
MGP_C57BL6NJ_G0027527	34.2521	1.5374	66.9668	43.5584	5.44488	1.79978e-05	0.00431546	3	26011371	26037615	+	5103	Tnfsf10	GO:0005125;GO:0005164;GO:0005164;GO:0005576;GO:0005615;GO:0005886;GO:0006915;GO:0006955;GO:0006955;GO:0008270;GO:0008270;GO:0010469;GO:0016020;GO:0016020;GO:0016021;GO:0032813;GO:0032813;GO:0042802;GO:0042802;GO:0043065;GO:0043280;GO:0045569;GO:0045569;GO:0046872;GO:0070062;GO:0090200;GO:2001238;GO:2001238;	K04721	tumor necrosis factor (ligand) superfamily, member10 [Source:MGI Symbol;Acc:MGI:107414]
MGP_C57BL6NJ_G0028784	94.7336	177.766	11.7013	0.0658242	-3.92524	1.96379e-05	0.00456494	4	64353922	64475714	+	13022	Col27a1	GO:0003431;GO:0005201;GO:0005583;GO:0030198;	K19721	collagen, type XXVII, alpha 1 [Source:MGISymbol;Acc:MGI:2672118]
MGP_C57BL6NJ_G0035765	174.426	348.852	0	0	-Inf	1.96426e-05	0.00456494	9	112790556	112804062	+	5007	Mst1r	GO:0000166;GO:0001725;GO:0001725;GO:0002376;GO:0004672;GO:0004713;GO:0004713;GO:0004714;GO:0004714;GO:0004888;GO:0005524;GO:0005524;GO:0005737;GO:0005773;GO:0005773;GO:0005886;GO:0005886;GO:0005887;GO:0006468;GO:0007169;GO:0009615;GO:0009615;GO:0009968;GO:0009986;GO:0016020;GO:0016021;GO:0016021;GO:0016032;GO:0016055;GO:0016301;GO:0016310;GO:0016740;GO:0017147;GO:0018108;GO:0019899;GO:0030154;GO:…	K05100	macrophage stimulating 1 receptor (c-met-relatedtyrosine kinase) [Source:MGI Symbol;Acc:MGI:99614]
MGP_C57BL6NJ_G0024030	1644.92	347.883	2941.95	8.45674	3.0801	2.09812e-05	0.00480215	17	36659122	36665823	-	1532	Aif1	GO:0001726;GO:0001891;GO:0005509;GO:0005634;GO:0005737;GO:0005884;GO:0006911;GO:0016601;GO:0030027;GO:0032587;GO:0051017;GO:0097178;	K18617	allograft inflammatory factor 1 [Source:MGISymbol;Acc:MGI:1343098]
MGP_C57BL6NJ_G0022718	22.1917	44.3834	0	0	-Inf	2.1349e-05	0.00481341	15	104198871	104202767	-	731	Fkbp11	GO:0000413;GO:0003755;GO:0003755;GO:0005528;GO:0005737;GO:0016020;GO:0016020;GO:0016021;GO:0016853;GO:0061077;	K09576	FK506 binding protein 11 [Source:MGISymbol;Acc:MGI:1913370]
MGP_C57BL6NJ_G0033892	575.087	1076.56	73.6114	0.0683763	-3.87036	2.23254e-05	0.00495952	8	12813738	12836009	+	7137	Kbtbd11	GO:0004842;GO:0016567;GO:0031463;	K10476	kelch repeat and BTB (POZ) domain containing 11[Source:MGI Symbol;Acc:MGI:1922151]
MGP_C57BL6NJ_G0035177	276.743	503.938	49.5482	0.098322	-3.34634	2.34017e-05	0.00512327	9	42868416	42887763	-	2388	Oaf	GO:0003674;GO:0008150;GO:0070062;	-	out at first homolog [Source:MGISymbol;Acc:MGI:94852]
MGP_C57BL6NJ_G0034463	34.8667	1.51794	68.2155	44.9395	5.48991	2.45e-05	0.0052871	8	99683492	99689583	+	2325	Ccl22	GO:0002548;GO:0005125;GO:0005576;GO:0005576;GO:0005615;GO:0005615;GO:0005615;GO:0005615;GO:0005615;GO:0006935;GO:0006954;GO:0006954;GO:0006954;GO:0006955;GO:0007186;GO:0008009;GO:0008009;GO:0010469;GO:0030593;GO:0043547;GO:0048020;GO:0048245;GO:0048247;GO:0060326;GO:0070098;GO:0070374;GO:0071346;GO:0071347;GO:0071356;	K21095	chemokine (C-C motif) ligand 22 [Source:MGISymbol;Acc:MGI:1306779]
MGP_C57BL6NJ_G0029746	923.624	185.377	1661.87	8.96482	3.16427	2.57513e-05	0.00547887	5	20318107	20326720	+	3787	Fgl2	GO:0005576;GO:0006508;GO:0008233;GO:0019835;GO:0070062;	-	fibrinogen-like protein 2 [Source:MGISymbol;Acc:MGI:103266]
MGP_C57BL6NJ_G0017390	101.568	15.696	187.44	11.9419	3.57796	2.75273e-05	0.00577537	10	4176173	4350620	-	9003	Ipcef1	GO:0005737;GO:0005829;GO:0005886;GO:0005886;GO:0016020;GO:0019904;	-	interaction protein for cytohesin exchange factors1 [Source:MGI Symbol;Acc:MGI:2444159]
MGP_C57BL6NJ_G0026033	665.699	1195.27	136.125	0.113886	-3.13433	2.93808e-05	0.00603014	2	32041171	32054514	+	2593	Ak1	GO:0000166;GO:0001520;GO:0004017;GO:0004017;GO:0004017;GO:0004550;GO:0004550;GO:0004550;GO:0005524;GO:0005524;GO:0005737;GO:0005737;GO:0005737;GO:0005829;GO:0005886;GO:0006139;GO:0006165;GO:0006165;GO:0006172;GO:0006172;GO:0007050;GO:0009142;GO:0009142;GO:0009142;GO:0010828;GO:0016301;GO:0016310;GO:0016740;GO:0016776;GO:0019205;GO:0030017;GO:0036126;GO:0043005;GO:0046033;GO:0046033;GO:0046034;GO:…	K00939	adenylate kinase 1 [Source:MGISymbol;Acc:MGI:87977]
MGP_C57BL6NJ_G0027223	26.2519	0.683556	51.8203	75.8099	6.24431	2.95399e-05	0.00603014	2	168630240	168740705	+	8826	Ppp1r16b	GO:0061028;	K17459	protein phosphatase 1, regulatory (inhibitor)subunit 16B [Source:MGI Symbol;Acc:MGI:2151841]
MGP_C57BL6NJ_G0023101	3517.93	795.032	6240.83	7.84979	2.97265	3.2737e-05	0.00659366	16	21734852	21739087	+	1573	Rtp4	GO:0001580;GO:0001580;GO:0005515;GO:0005737;GO:0005737;GO:0006612;GO:0006612;GO:0009986;GO:0016020;GO:0016021;GO:0031849;GO:0051205;GO:0051607;	-	receptor transporter protein 4 [Source:MGISymbol;Acc:MGI:1915025]
MGP_C57BL6NJ_G0025761	53.8481	6.16382	101.532	16.4723	4.04197	3.61305e-05	0.00718141	2	9304532	9362648	+	5711	Il2ra	GO:0002376;GO:0002437;GO:0002664;GO:0004911;GO:0004911;GO:0004911;GO:0004911;GO:0005515;GO:0006924;GO:0006924;GO:0006955;GO:0007219;GO:0007219;GO:0008144;GO:0009897;GO:0009897;GO:0009986;GO:0016020;GO:0016021;GO:0019976;GO:0019976;GO:0038110;GO:0042102;GO:0042104;GO:0042104;GO:0042130;GO:0042130;GO:0043029;GO:0043029;GO:0045582;GO:0046013;GO:0046013;GO:0050672;GO:0050672;GO:0050687;GO:0050728;GO:…	K05068	interleukin 2 receptor, alpha chain [Source:MGISymbol;Acc:MGI:96549]
MGP_C57BL6NJ_G0021793	46.5716	4.69497	88.4482	18.8389	4.23564	3.66523e-05	0.00719052	14	52857646	52861050	-	1418	Gzmb	GO:0001913;GO:0001913;GO:0004252;GO:0004252;GO:0005515;GO:0005737;GO:0005737;GO:0005737;GO:0005829;GO:0006508;GO:0006508;GO:0006915;GO:0008233;GO:0008236;GO:0008236;GO:0008236;GO:0008626;GO:0008626;GO:0008626;GO:0008626;GO:0016787;GO:0019835;GO:0030141;GO:0030141;GO:0042267;GO:0044194;GO:0044194;	K01353	granzyme B [Source:MGI Symbol;Acc:MGI:109267]"
MGP_C57BL6NJ_G0020802	65.3973	7.65959	123.135	16.0759	4.00683	3.91537e-05	0.00758277	13	29615202	29632879	+	4715	Irf4	GO:0000788;GO:0000788;GO:0000978;GO:0001077;GO:0003677;GO:0003700;GO:0003700;GO:0003700;GO:0005515;GO:0005515;GO:0005515;GO:0005634;GO:0005654;GO:0006351;GO:0006355;GO:0006355;GO:0006366;GO:0006479;GO:0006479;GO:0016020;GO:0016279;GO:0016279;GO:0018022;GO:0034122;GO:0034122;GO:0042832;GO:0042832;GO:0043011;GO:0043011;GO:0043011;GO:0043388;GO:0043388;GO:0043565;GO:0043565;GO:0043966;GO:0043966;GO:…	K09445	interferon regulatory factor 4 [Source:MGISymbol;Acc:MGI:1096873]
MGP_C57BL6NJ_G0025717	51.063	97.7904	4.33552	0.0443348	-4.49542	3.96745e-05	0.00758636	2	59424	178972	+	4229	Fam171a1	GO:0003674;GO:0008150;GO:0016020;GO:0016021;GO:0070062;	-	family with sequence similarity 171, member A1[Source:MGI Symbol;Acc:MGI:2442917]
MGP_C57BL6NJ_G0025291	1580.92	368.087	2793.76	7.58994	2.92409	4.19674e-05	0.0079245	19	9079801	9092949	-	4065	Ms4a14	GO:0003674;GO:0005575;GO:0008150;GO:0016020;GO:0016021;GO:0016021;	K22192	membrane-spanning 4-domains, subfamily A, member 14[Source:MGI Symbol;Acc:MGI:2686122]
MGP_C57BL6NJ_G0020848	393.105	79.4345	706.776	8.89759	3.15341	4.3958e-05	0.0080441	13	36783916	36867090	+	997	Ly86	GO:0002376;GO:0005515;GO:0005576;GO:0005615;GO:0006954;GO:0031666;GO:0031666;GO:0045087;	-	lymphocyte antigen 86 [Source:MGISymbol;Acc:MGI:1321404]
MGP_C57BL6NJ_G0017212	145.253	24.5626	265.944	10.8272	3.43659	4.39683e-05	0.0080441	1	185422075	185567291	-	2425	-	-	#N/A	-
MGP_C57BL6NJ_G0017216	1128.72	253.456	2003.99	7.90667	2.98307	4.41983e-05	0.0080441	1	185917675	185946529	-	2762	-	-	-	-
MGP_C57BL6NJ_G0031776	16.5997	0	33.1995	Inf	Inf	5.17023e-05	0.00929779	6	136183284	136195466	+	2025	Klrb1f	GO:0004872;GO:0004872;GO:0005515;GO:0005886;GO:0005886;GO:0007165;GO:0008150;GO:0009986;GO:0009986;GO:0016020;GO:0016021;GO:0030246;GO:0038023;GO:0038023;	K06543	killer cell lectin-like receptor subfamily B member1F [Source:MGI Symbol;Acc:MGI:2442965]
MGP_C57BL6NJ_G0023517	112.475	207.143	17.8074	0.0859668	-3.54008	5.71822e-05	0.0101623	17	438447	641976	+	6281	Tiam2	GO:0005057;GO:0005085;GO:0005085;GO:0005085;GO:0005085;GO:0005089;GO:0005096;GO:0005096;GO:0005515;GO:0005737;GO:0005737;GO:0005737;GO:0007165;GO:0016020;GO:0016020;GO:0030027;GO:0030175;GO:0030426;GO:0035023;GO:0035556;GO:0042995;GO:0043547;GO:0065009;GO:0070062;	K16847	T cell lymphoma invasion and metastasis 2[Source:MGI Symbol;Acc:MGI:1344338]
MGP_C57BL6NJ_G0023317	42.0936	3.78595	80.4012	21.2367	4.40849	6.18005e-05	0.0108553	16	59254509	59317770	-	6080	St3gal6	GO:0000139;GO:0000139;GO:0003836;GO:0005575;GO:0005794;GO:0006464;GO:0006464;GO:0006486;GO:0006664;GO:0006664;GO:0008373;GO:0008373;GO:0009311;GO:0009311;GO:0009311;GO:0016020;GO:0016021;GO:0016740;GO:0016757;GO:0018279;GO:0052798;GO:0052798;GO:0052798;GO:0070062;GO:0071354;GO:0097503;	K03792	ST3 beta-galactoside alpha-2,3-sialyltransferase 6[Source:MGI Symbol;Acc:MGI:1888707]
MGP_C57BL6NJ_G0024872	279.337	13.3786	545.296	40.759	5.34905	6.84295e-05	0.0116896	18	61763972	61773238	+	2927	F830016B08Rik	GO:0003924;GO:0005525;GO:0005789;GO:0006952;GO:0016020;GO:0016020;GO:0016021;GO:0035458;	-	RIKEN cDNA F830016B08 gene [Source:MGISymbol;Acc:MGI:3588218]
MGP_C57BL6NJ_G0016472	21.6546	0.625996	42.6833	68.1845	6.09137	6.84805e-05	0.0116896	1	63447502	63468881	+	3429	Icos	GO:0002517;GO:0005515;GO:0005515;GO:0005887;GO:0005887;GO:0009897;GO:0009897;GO:0016020;GO:0016021;GO:0031295;GO:0098609;	K06713	inducible T cell co-stimulator [Source:MGISymbol;Acc:MGI:1858745]
MGP_C57BL6NJ_G0017540	74.0803	142.962	5.19835	0.0363617	-4.78144	7.00828e-05	0.0116896	10	33777907	33914376	+	4799	Frk	GO:0000122;GO:0000166;GO:0004672;GO:0004713;GO:0004713;GO:0004713;GO:0004715;GO:0004715;GO:0005102;GO:0005524;GO:0005524;GO:0005634;GO:0005634;GO:0005654;GO:0005737;GO:0005829;GO:0005886;GO:0006468;GO:0007169;GO:0016301;GO:0016310;GO:0016477;GO:0016740;GO:0030154;GO:0031234;GO:0038083;GO:0042127;GO:0045087;GO:0070062;	K08892	fyn-related kinase [Source:MGISymbol;Acc:MGI:103265]
MGP_C57BL6NJ_G0033196	257.585	57.8171	457.353	7.91034	2.98374	7.03722e-05	0.0116896	7	111723508	111745277	-	1542	Trim30c	GO:0003674;GO:0004842;GO:0005575;GO:0005622;GO:0006914;GO:0008150;GO:0008270;GO:0016567;GO:0045087;GO:0046872;GO:0051607;	-	tripartite motif-containing 30C [Source:MGISymbol;Acc:MGI:4821257]
MGP_C57BL6NJ_G0031772	23.8029	0.938995	46.6669	49.6988	5.63514	7.04195e-05	0.0116896	6	135935973	135950338	-	2228	Klrb1b	GO:0004872;GO:0004872;GO:0005515;GO:0005886;GO:0005886;GO:0005887;GO:0005887;GO:0007165;GO:0009897;GO:0009897;GO:0016020;GO:0016021;GO:0030246;GO:0038023;GO:0038023;GO:0042803;GO:0042803;GO:0045953;GO:0045953;	K06543	killer cell lectin-like receptor subfamily B member1B [Source:MGI Symbol;Acc:MGI:107539]
MGP_C57BL6NJ_G0032671	46.6078	88.9207	4.2948	0.0482992	-4.37186	7.77008e-05	0.0127581	7	47439073	47458929	-	2793	Cpt1c	GO:0004095;GO:0004095;GO:0004095;GO:0005739;GO:0005739;GO:0005739;GO:0005739;GO:0005741;GO:0005783;GO:0005783;GO:0005789;GO:0006629;GO:0006631;GO:0006635;GO:0009437;GO:0009437;GO:0015909;GO:0016020;GO:0016021;GO:0016740;GO:0016746;GO:0016746;GO:0030054;GO:0030424;GO:0030424;GO:0030425;GO:0030425;GO:0032281;GO:0032281;GO:0042995;GO:0045202;	K19524	carnitine palmitoyltransferase 1c [Source:MGISymbol;Acc:MGI:2446526]
MGP_C57BL6NJ_G0017500	24.9638	1.25199	48.6756	38.8785	5.2809	9.12405e-05	0.0148202	10	25031614	25077873	+	3554	Samd3	GO:0003674;GO:0005575;GO:0008150;	-	sterile alpha motif domain containing 3 [Source:MGISymbol;Acc:MGI:2685469]
MGP_C57BL6NJ_G0030250	251.242	38.7955	463.689	11.9521	3.5792	9.77878e-05	0.0157147	5	111176115	111344951	-	3415	Gbp8	GO:0071346;	K20908	guanylate-binding protein 8 [Source:MGISymbol;Acc:MGI:1923324]
MGP_C57BL6NJ_G0031147	18.2485	0.312998	36.1839	115.604	6.85305	0.000100302	0.015949	6	48824847	48834575	+	4149	Gimap5	GO:0000166;GO:0005515;GO:0005525;GO:0005525;GO:0005525;GO:0005739;GO:0005739;GO:0005741;GO:0005764;GO:0005783;GO:0016020;GO:0016021;	-	GTPase, IMAP family member 5 [Source:MGISymbol;Acc:MGI:2442232]
MGP_C57BL6NJ_G0019244	289.525	60.4078	518.643	8.58569	3.10193	0.000104903	0.0165069	11	87455568	87460312	-	960	Ccl5	GO:0000165;GO:0002230;GO:0002548;GO:0004435;GO:0004672;GO:0005125;GO:0005515;GO:0005576;GO:0005576;GO:0005615;GO:0005615;GO:0005615;GO:0005615;GO:0005615;GO:0005737;GO:0005737;GO:0006816;GO:0006874;GO:0006887;GO:0006935;GO:0006954;GO:0006954;GO:0006954;GO:0006954;GO:0006954;GO:0006955;GO:0007159;GO:0007159;GO:0007186;GO:0007186;GO:0007186;GO:0007267;GO:0007267;GO:0008009;GO:0008009;GO:0008009;GO:…	K12499	chemokine (C-C motif) ligand 5 [Source:MGISymbol;Acc:MGI:98262]
MGP_C57BL6NJ_G0036411	711.413	1250.1	172.721	0.138165	-2.85553	0.000106122	0.0165266	X	93734744	93741413	-	4351	Maged1	GO:0000785;GO:0000785;GO:0003713;GO:0003713;GO:0005515;GO:0005515;GO:0005515;GO:0005634;GO:0005634;GO:0005737;GO:0005829;GO:0005886;GO:0006357;GO:0006357;GO:0016020;GO:0032922;GO:0032922;GO:0032922;GO:0032991;GO:0042752;GO:0042752;GO:0042802;GO:0042981;GO:0043234;GO:0043406;GO:0043406;GO:0045892;GO:0045892;GO:0045893;GO:0045893;GO:0048511;GO:0050680;GO:0090190;GO:0090190;GO:2001235;GO:2001235;	K12464	melanoma antigen, family D, 1 [Source:MGISymbol;Acc:MGI:1930187]
MGP_C57BL6NJ_G0025030	29.3921	1.93555	56.8487	29.3708	4.87631	0.000109927	0.016829	18	92855606	92932451	+	2357	Cd226	GO:0001816;GO:0001816;GO:0002729;GO:0002729;GO:0002860;GO:0002860;GO:0002891;GO:0004872;GO:0005102;GO:0005178;GO:0005515;GO:0005886;GO:0005887;GO:0005913;GO:0007155;GO:0007156;GO:0007157;GO:0008037;GO:0009897;GO:0009897;GO:0009986;GO:0016020;GO:0016021;GO:0019901;GO:0032729;GO:0032729;GO:0033005;GO:0042803;GO:0045954;GO:0050839;GO:0050839;GO:0050862;GO:0060369;	K06567	CD226 antigen [Source:MGI Symbol;Acc:MGI:3039602]"
MGP_C57BL6NJ_G0017807	170.671	32.8404	308.502	9.39396	3.23173	0.000110292	0.016829	10	81093594	81154552	-	12293	Trpm2	GO:0005261;GO:0006812;GO:0006979;GO:0016021;GO:0034220;GO:0047631;GO:0071421;GO:0098655;	K04977	transient receptor potential cation channel,subfamily M, member 2 [Source:MGI Symbol;Acc:MGI:1351901]
MGP_C57BL6NJ_G0029863	2291.93	3997.8	586.063	0.146596	-2.77008	0.000119521	0.0180548	5	32004578	32026626	+	9699	Fosl2	GO:0000977;GO:0000977;GO:0000978;GO:0001228;GO:0001666;GO:0003334;GO:0003334;GO:0003677;GO:0003677;GO:0003677;GO:0003682;GO:0003682;GO:0003690;GO:0003700;GO:0003700;GO:0005634;GO:0005634;GO:0005634;GO:0005634;GO:0005654;GO:0006351;GO:0006355;GO:0006355;GO:0006357;GO:0006366;GO:0006366;GO:0032355;GO:0043565;GO:0044212;GO:0045893;GO:0045893;GO:0045893;GO:0045944;GO:0045944;GO:0048146;GO:0048146;	K09030	fos-like antigen 2 [Source:MGISymbol;Acc:MGI:102858]
MGP_C57BL6NJ_G0027496	226.934	426.995	26.8717	0.0629321	-3.99006	0.000122588	0.0181798	3	12837470	12853700	+	2422	Car2	GO:0002009;GO:0004064;GO:0004089;GO:0004089;GO:0004089;GO:0005615;GO:0005737;GO:0005737;GO:0005829;GO:0005829;GO:0005886;GO:0005886;GO:0005902;GO:0006730;GO:0006885;GO:0008270;GO:0008270;GO:0015670;GO:0016020;GO:0016323;GO:0016829;GO:0030424;GO:0032230;GO:0032849;GO:0038166;GO:0038166;GO:0043209;GO:0043209;GO:0044070;GO:0044070;GO:0045177;GO:0045672;GO:0045780;GO:0046872;GO:0046903;GO:0051453;GO:…	-	carbonic anhydrase 2 [Source:MGISymbol;Acc:MGI:88269]
MGP_C57BL6NJ_G0030251	128.117	15.7333	240.5	15.2861	3.93415	0.000122755	0.0181798	5	111319079	111344997	-	7356	Gbp4	GO:0000122;GO:0000122;GO:0000166;GO:0001933;GO:0001933;GO:0003924;GO:0005515;GO:0005525;GO:0005525;GO:0016020;GO:0031397;GO:0031397;GO:0032687;GO:0032687;GO:0042308;GO:0042308;GO:0050688;GO:0050688;GO:0070062;GO:0071346;GO:0071346;	K20908	guanylate binding protein 4 [Source:MGISymbol;Acc:MGI:97072]
MGP_C57BL6NJ_G0030042	17.6102	35.2204	0	0	-Inf	0.000129408	0.0188819	5	75202926	75431880	-	5400	Corin	GO:0003050;GO:0003050;GO:0004252;GO:0004252;GO:0004252;GO:0005044;GO:0005576;GO:0005886;GO:0005886;GO:0005887;GO:0006508;GO:0006508;GO:0006898;GO:0007565;GO:0007565;GO:0008217;GO:0008217;GO:0008233;GO:0008236;GO:0009986;GO:0015629;GO:0016020;GO:0016020;GO:0016021;GO:0016486;GO:0016486;GO:0016486;GO:0016604;GO:0016787;GO:0030182;GO:0031410;GO:0035813;GO:0035813;GO:0003050;GO:0004252;GO:0007565;GO:…	K09614	corin [Source:MGI Symbol;Acc:MGI:1349451]"
MGP_C57BL6NJ_G0025643	1174.32	2055.85	292.794	0.14242	-2.81178	0.000129996	0.0188819	19	48192796	48409718	-	10464	Sh3pxd2a	GO:0002020;GO:0002020;GO:0002102;GO:0002102;GO:0002102;GO:0002102;GO:0005515;GO:0005546;GO:0005546;GO:0005737;GO:0005737;GO:0006801;GO:0006801;GO:0010314;GO:0010314;GO:0016176;GO:0030054;GO:0032266;GO:0032266;GO:0035091;GO:0035091;GO:0035091;GO:0035091;GO:0042995;GO:0043085;GO:0043325;GO:0043325;GO:0055114;GO:0070273;GO:0070273;GO:0071800;GO:0072593;GO:0072593;GO:0072675;	-	SH3 and PX domains 2A [Source:MGISymbol;Acc:MGI:1298393]
MGP_C57BL6NJ_G0025411	113.445	206.129	20.7608	0.100717	-3.31162	0.000142777	0.0205409	19	23226262	23513080	-	4035	Pip5k1b	GO:0000166;GO:0001931;GO:0005515;GO:0005515;GO:0005524;GO:0005829;GO:0006661;GO:0012505;GO:0016020;GO:0016301;GO:0016307;GO:0016308;GO:0016308;GO:0016310;GO:0016740;GO:0046488;GO:0046488;GO:0046854;GO:0005829;GO:0006661;GO:0016308;GO:0046488;	-	phosphatidylinositol-4-phosphate 5-kinase, type 1beta [Source:MGI Symbol;Acc:MGI:107930]
MGP_C57BL6NJ_G0021900	708.802	180.629	1236.97	6.84817	2.77572	0.000146252	0.0208423	14	64128064	64232726	+	8144	Adra1a	GO:0001985;GO:0001994;GO:0001994;GO:0001996;GO:0001997;GO:0003084;GO:0004871;GO:0004930;GO:0004930;GO:0004935;GO:0004935;GO:0004937;GO:0004937;GO:0004937;GO:0005634;GO:0005634;GO:0005737;GO:0005737;GO:0005886;GO:0005886;GO:0005887;GO:0005901;GO:0006937;GO:0007165;GO:0007186;GO:0007186;GO:0007188;GO:0007200;GO:0007200;GO:0007202;GO:0007204;GO:0007204;GO:0007267;GO:0007512;GO:0007568;GO:0009725;GO:…	-	adrenergic receptor, alpha 1a [Source:MGISymbol;Acc:MGI:104773]
MGP_C57BL6NJ_G0019257	20.6303	41.2606	0	0	-Inf	0.00014894	0.0209387	11	88031239	88054964	-	1945	Dusp14	GO:0000188;GO:0003723;GO:0004721;GO:0004725;GO:0004725;GO:0005634;GO:0005737;GO:0006470;GO:0008138;GO:0016311;GO:0016787;GO:0016791;GO:0017017;GO:0035335;GO:0035335;	K14165	dual specificity phosphatase 14 [Source:MGISymbol;Acc:MGI:1927168]
MGP_C57BL6NJ_G0031675	1036.18	263.124	1809.23	6.87594	2.78156	0.000149701	0.0209387	6	129412323	129426231	+	1327	Clec4a3	GO:0003674;GO:0004190;GO:0005575;GO:0006508;GO:0008150;GO:0016020;GO:0016021;GO:0030246;	K10057	C-type lectin domain family 4, member a3[Source:MGI Symbol;Acc:MGI:1920399]
MGP_C57BL6NJ_G0019155	47.6908	90.206	5.17573	0.0573768	-4.12339	0.000156918	0.0217468	11	81611005	81618856	-	3341	Traf4	GO:0007585;GO:0019901;GO:0030323;	K09848	TNF receptor associated factor 4 [Source:MGISymbol;Acc:MGI:1202880]
MGP_C57BL6NJ_G0027609	63.5559	127.112	0	0	-Inf	0.000162658	0.0223374	3	50151594	50165608	-	5366	Pcdh18	GO:0005509;GO:0005509;GO:0005515;GO:0005515;GO:0005886;GO:0005886;GO:0005887;GO:0005887;GO:0007155;GO:0007155;GO:0007155;GO:0007156;GO:0007156;GO:0007267;GO:0007399;GO:0007420;GO:0007420;GO:0016020;GO:0016020;GO:0016021;GO:0016339;	K16499	protocadherin 18 [Source:MGISymbol;Acc:MGI:1920423]
MGP_C57BL6NJ_G0034137	439.436	823.105	55.7677	0.0677529	-3.88357	0.000169119	0.0230155	8	67017251	67122882	-	2087	Cpe	GO:0003214;GO:0004180;GO:0004180;GO:0004180;GO:0004181;GO:0004181;GO:0004181;GO:0004185;GO:0005576;GO:0005576;GO:0005615;GO:0005615;GO:0005615;GO:0005615;GO:0005794;GO:0005794;GO:0006508;GO:0006508;GO:0006518;GO:0006518;GO:0008233;GO:0008233;GO:0008237;GO:0008270;GO:0016020;GO:0016055;GO:0016485;GO:0016485;GO:0016787;GO:0019904;GO:0030070;GO:0030070;GO:0030070;GO:0030141;GO:0030141;GO:0030425;GO:…	K01294	carboxypeptidase E [Source:MGISymbol;Acc:MGI:101932]
MGP_C57BL6NJ_G0017098	44.02	83.3191	4.72104	0.0566622	-4.14147	0.000181249	0.024446	1	176819205	176865226	-	3449	Mpzl1	GO:0005887;GO:0005925;GO:0007165;GO:0009986;GO:0016020;GO:0016020;GO:0016021;	K06770	myelin protein zero-like 1 [Source:MGISymbol;Acc:MGI:1915731]
MGP_C57BL6NJ_G0021326	192.459	341.767	43.1512	0.126259	-2.98554	0.000187463	0.024881	13	118809831	118880630	+	1635	Plpp1	GO:0005886;GO:0005886;GO:0005886;GO:0005887;GO:0005887;GO:0006470;GO:0006470;GO:0006629;GO:0006644;GO:0006651;GO:0006670;GO:0006672;GO:0007165;GO:0008195;GO:0008195;GO:0008195;GO:0008195;GO:0008195;GO:0016020;GO:0016021;GO:0016787;GO:0016791;GO:0042577;GO:0046839;	-	phospholipid phosphatase 1 [Source:MGISymbol;Acc:MGI:108412]
MGP_C57BL6NJ_G0026827	188567	54728.7	322406	5.89098	2.55851	0.000187769	0.024881	2	129195593	129200990	+	860	B2m	GO:0001916;GO:0001916;GO:0002237;GO:0002237;GO:0002376;GO:0002474;GO:0002481;GO:0002481;GO:0002726;GO:0005515;GO:0005576;GO:0005615;GO:0005615;GO:0005615;GO:0005794;GO:0005829;GO:0005886;GO:0005925;GO:0006826;GO:0006826;GO:0006955;GO:0006968;GO:0009897;GO:0009897;GO:0010977;GO:0010977;GO:0016020;GO:0019885;GO:0030670;GO:0032092;GO:0033077;GO:0033077;GO:0033216;GO:0033216;GO:0042026;GO:0042026;GO:…	K08055	beta-2 microglobulin [Source:MGISymbol;Acc:MGI:88127]
MGP_C57BL6NJ_G0033463	423.075	99.3234	746.826	7.51914	2.91057	0.000193555	0.0254248	7	134898686	134930070	+	2745	Il21r	GO:0004888;GO:0004896;GO:0004896;GO:0007165;GO:0016020;GO:0016020;GO:0016021;GO:0019221;GO:0004896;	-	interleukin 21 receptor [Source:MGISymbol;Acc:MGI:1890475]
MGP_C57BL6NJ_G0031296	31.7934	3.12998	60.4568	19.3154	4.27168	0.000196122	0.0255398	6	73740391	73745169	+	1950	Cd8a	GO:0002456;GO:0007166;GO:0009897;GO:0009986;GO:0042803;GO:0045065;GO:0050850;GO:0051607;	K06458	CD8 antigen, alpha chain [Source:MGISymbol;Acc:MGI:88346]
MGP_C57BL6NJ_G0035904	34.1455	3.58569	64.7053	18.0455	4.17356	0.000207261	0.0267597	9	124468157	124476074	+	4155	Eomes	GO:0000122;GO:0000790;GO:0000977;GO:0001102;GO:0001191;GO:0001227;GO:0001706;GO:0001706;GO:0001707;GO:0001707;GO:0001714;GO:0001824;GO:0001829;GO:0002250;GO:0002302;GO:0002302;GO:0002376;GO:0003677;GO:0003682;GO:0003700;GO:0005622;GO:0005634;GO:0005634;GO:0005634;GO:0006351;GO:0006355;GO:0006355;GO:0006357;GO:0007275;GO:0007369;GO:0007420;GO:0010002;GO:0010468;GO:0019827;GO:0021772;GO:0021796;GO:…	K10173	eomesodermin [Source:MGI Symbol;Acc:MGI:1201683]"
MGP_C57BL6NJ_G0018375	95.9966	174.194	17.7994	0.102181	-3.2908	0.000224486	0.028738	11	1273900	1291663	+	4350	Lif	GO:0001135;GO:0001974;GO:0001974;GO:0005102;GO:0005125;GO:0005125;GO:0005125;GO:0005125;GO:0005125;GO:0005146;GO:0005146;GO:0005146;GO:0005576;GO:0005576;GO:0005615;GO:0005615;GO:0005615;GO:0005615;GO:0005615;GO:0005622;GO:0005829;GO:0006955;GO:0007260;GO:0007260;GO:0007566;GO:0007566;GO:0008083;GO:0008083;GO:0008083;GO:0008083;GO:0008284;GO:0008284;GO:0008284;GO:0008285;GO:0008285;GO:0010469;GO:…	K05419	leukemia inhibitory factor [Source:MGISymbol;Acc:MGI:96787]
MGP_C57BL6NJ_G0024847	201.103	356.339	45.8661	0.128715	-2.95775	0.000230251	0.0292283	18	54340066	54352722	-	1286	Ppic	GO:0000413;GO:0000413;GO:0000413;GO:0000413;GO:0003755;GO:0003755;GO:0003755;GO:0003755;GO:0003755;GO:0005515;GO:0005737;GO:0006457;GO:0016018;GO:0016018;GO:0016018;GO:0016853;GO:0051082;GO:0070062;	K09563	peptidylprolyl isomerase C [Source:MGISymbol;Acc:MGI:97751]
MGP_C57BL6NJ_G0022463	39.923	79.846	0	0	-Inf	0.000242178	0.0302665	15	82184592	82192817	+	2541	Cdc42ep1	GO:0098609;	-	CDC42 effector protein (Rho GTPase binding) 1[Source:MGI Symbol;Acc:MGI:1929763]
MGP_C57BL6NJ_G0020545	910.195	234.86	1585.53	6.75095	2.75509	0.000242437	0.0302665	12	118797566	118808293	+	1978	Pld4	GO:0002244;GO:0002244;GO:0002244;GO:0003824;GO:0004630;GO:0005515;GO:0005634;GO:0005634;GO:0005634;GO:0005783;GO:0005783;GO:0005783;GO:0005789;GO:0006629;GO:0006909;GO:0006909;GO:0006909;GO:0016020;GO:0016021;GO:0016042;GO:0016787;GO:0032588;GO:0032588;GO:0032588;GO:0045335;GO:0045335;GO:0045335;GO:0070290;	K16860	phospholipase D family, member 4 [Source:MGISymbol;Acc:MGI:2144765]
MGP_C57BL6NJ_G0035723	27.2805	53.2823	1.27874	0.0239994	-5.38086	0.000247848	0.0306884	9	111230310	111237922	-	2087	Abhd14a	-	K13706	abhydrolase domain containing 14A [Source:MGISymbol;Acc:MGI:1915894]
MGP_C57BL6NJ_G0031146	21.9797	1.25199	42.7075	34.1116	5.09219	0.000253311	0.0311099	6	48817744	48822440	+	3028	Gimap1	GO:0005525;GO:0016020;GO:0016021;	-	GTPase, IMAP family member 1 [Source:MGISymbol;Acc:MGI:109368]
MGP_C57BL6NJ_G0017218	764.777	209.528	1320.03	6.30001	2.65536	0.000264485	0.0322202	1	186068896	186105573	-	3891	Ifi205	GO:0000122;GO:0000978;GO:0001047;GO:0001078;GO:0003690;GO:0003690;GO:0003723;GO:0005634;GO:0005634;GO:0005730;GO:0005829;GO:0006351;GO:0006355;GO:0008134;GO:0009617;GO:0009617;GO:0016020;GO:0035458;GO:0035458;GO:0042802;	-	interferon activated gene 205 [Source:MGISymbol;Acc:MGI:101847]
MGP_C57BL6NJ_G0028275	149.308	266.774	31.8432	0.119364	-3.06656	0.000271946	0.0328642	3	134046904	134673765	-	31242	-	-	K10380	-
MGP_C57BL6NJ_G0029399	1275.01	342.188	2207.82	6.45208	2.68976	0.000276168	0.0331095	4	144466891	144469777	-	1040	C1qa	GO:0002376;GO:0005515;GO:0005576;GO:0005581;GO:0005615;GO:0005615;GO:0006958;GO:0006958;GO:0006958;GO:0006958;GO:0045087;GO:0070062;	K03986	complement component 1, q subcomponent, alphapolypeptide [Source:MGI Symbol;Acc:MGI:88223]
MGP_C57BL6NJ_G0022546	13.1342	0	26.2684	Inf	Inf	0.000291637	0.0346887	15	85958953	85963072	-	1898	-	-	K05151	-
MGP_C57BL6NJ_G0017672	32.0455	61.5028	2.58818	0.0420824	-4.57064	0.000294948	0.0348085	10	62647294	62744852	-	5197	Adamts14	GO:0004222;GO:0005576;GO:0006508;GO:0007229;GO:0008233;GO:0008233;GO:0008237;GO:0008270;GO:0030199;GO:0046872;GO:0005576;GO:0008233;GO:0030199;	K08628	a disintegrin-like and metallopeptidase (reprolysintype) with thrombospondin type 1 motif, 14 [Source:MGISymbol;Acc:MGI:2179942]
MGP_C57BL6NJ_G0034487	104.959	188.688	21.2307	0.112517	-3.15178	0.00030151	0.0350402	8	100743328	100787212	+	4709	Ndrg4	GO:0005515;GO:0005737;GO:0005737;GO:0005737;GO:0005737;GO:0005739;GO:0005789;GO:0005829;GO:0007165;GO:0007420;GO:0008542;GO:0010642;GO:0010976;GO:0014912;GO:0016323;GO:0031253;GO:0048278;GO:0048662;GO:0060973;GO:0070374;GO:0070374;GO:2001135;GO:0005737;GO:0008542;GO:0031253;GO:0048278;GO:0060973;GO:2001135;	-	N-myc downstream regulated gene 4 [Source:MGISymbol;Acc:MGI:2384590]
MGP_C57BL6NJ_G0033973	504.455	874.414	134.496	0.153813	-2.70075	0.000301551	0.0350402	8	24525860	24588986	+	8022	Fgfr1	GO:0000122;GO:0000166;GO:0001525;GO:0001525;GO:0001657;GO:0001701;GO:0001759;GO:0002053;GO:0002062;GO:0004672;GO:0004713;GO:0004713;GO:0004713;GO:0004713;GO:0004714;GO:0004714;GO:0004888;GO:0005007;GO:0005007;GO:0005007;GO:0005102;GO:0005515;GO:0005515;GO:0005524;GO:0005524;GO:0005634;GO:0005634;GO:0005730;GO:0005737;GO:0005737;GO:0005737;GO:0005829;GO:0005886;GO:0005886;GO:0005886;GO:0005887;GO:…	-	fibroblast growth factor receptor 1 [Source:MGISymbol;Acc:MGI:95522]
MGP_C57BL6NJ_G0018491	949.512	262.924	1636.1	6.22272	2.63755	0.000312996	0.0360925	11	25253721	25387125	-	6591	Vrk2	GO:0000166;GO:0004672;GO:0004674;GO:0004674;GO:0005524;GO:0005524;GO:0005634;GO:0005634;GO:0005634;GO:0005737;GO:0005737;GO:0005739;GO:0005783;GO:0005783;GO:0005789;GO:0005789;GO:0006468;GO:0006468;GO:0008360;GO:0016020;GO:0016020;GO:0016021;GO:0016301;GO:0016310;GO:0016740;GO:0018105;GO:0018107;GO:0019901;GO:0019904;GO:0031966;GO:0031966;GO:0032991;GO:0034599;GO:0034599;GO:0043234;GO:0043408;GO:…	K08816	vaccinia related kinase 2 [Source:MGISymbol;Acc:MGI:1917172]
MGP_C57BL6NJ_G0030381	6526.2	1857.08	11195.3	6.02846	2.59179	0.000334432	0.0382283	5	122248776	122267823	+	6378	Oasl2	GO:0000166;GO:0001730;GO:0001730;GO:0001730;GO:0001730;GO:0002376;GO:0003723;GO:0003723;GO:0003725;GO:0003725;GO:0003725;GO:0003725;GO:0003725;GO:0005524;GO:0005524;GO:0005575;GO:0005634;GO:0005654;GO:0005829;GO:0006164;GO:0006164;GO:0006955;GO:0009615;GO:0016740;GO:0016740;GO:0016779;GO:0016779;GO:0045071;GO:0045087;GO:0046872;GO:0051607;GO:0051607;GO:0051607;GO:0060700;	K14608	2'-5' oligoadenylate synthetase-like 2 [Source:MGISymbol;Acc:MGI:1344390]
MGP_C57BL6NJ_G0018675	79.1737	15.6847	142.663	9.09569	3.18518	0.000338496	0.0382283	11	53124289	53155703	-	2854	Tcf7	GO:0000122;GO:0000122;GO:0000978;GO:0000978;GO:0001047;GO:0001047;GO:0001227;GO:0001227;GO:0003677;GO:0003677;GO:0003677;GO:0003700;GO:0003700;GO:0005634;GO:0005634;GO:0005634;GO:0005634;GO:0005667;GO:0005719;GO:0005719;GO:0006351;GO:0006355;GO:0006355;GO:0006355;GO:0006355;GO:0006357;GO:0006357;GO:0008013;GO:0008013;GO:0016055;GO:0016055;GO:0016055;GO:0016055;GO:0021915;GO:0021915;GO:0030538;GO:…	K02620	transcription factor 7, T cell specific [Source:MGISymbol;Acc:MGI:98507]
MGP_C57BL6NJ_G0035984	29.5323	3.04484	56.0198	18.3983	4.2015	0.000344307	0.0382283	9	130366261	130371538	+	1893	Cxcr6	GO:0004871;GO:0004930;GO:0004930;GO:0004950;GO:0005622;GO:0005886;GO:0006935;GO:0006935;GO:0006954;GO:0006955;GO:0007165;GO:0007186;GO:0007186;GO:0007204;GO:0009897;GO:0015026;GO:0016020;GO:0016021;GO:0016021;GO:0016493;GO:0016494;GO:0016494;GO:0016494;GO:0019722;GO:0019956;GO:0019957;GO:0019958;GO:0019958;GO:0060326;GO:0070098;	K04191	chemokine (C-X-C motif) receptor 6 [Source:MGISymbol;Acc:MGI:1934582]
MGP_C57BL6NJ_G0028317	33.2319	63.4313	3.03253	0.0478082	-4.3866	0.000345336	0.0382283	3	142991100	143015613	+	4250	Bdh2	GO:0003858;GO:0003858;GO:0003858;GO:0003858;GO:0005737;GO:0005737;GO:0005737;GO:0005737;GO:0005829;GO:0006635;GO:0006635;GO:0016491;GO:0016491;GO:0016628;GO:0019290;GO:0019290;GO:0030855;GO:0042168;GO:0051287;GO:0051287;GO:0055072;GO:0055072;GO:0055114;GO:0070062;	K00019	3-hydroxybutyrate dehydrogenase, type 2 [Source:MGISymbol;Acc:MGI:1917022]
MGP_C57BL6NJ_G0017213	11611.7	3559.29	19664.1	5.52473	2.4659	0.000345552	0.0382283	1	185706567	185724540	-	3271	AI607873	GO:0000122;GO:0000978;GO:0001047;GO:0001078;GO:0003690;GO:0003723;GO:0005634;GO:0005730;GO:0005829;GO:0008134;GO:0016020;GO:0042802;	K20914	expressed sequence AI607873 [Source:MGISymbol;Acc:MGI:2138302]
MGP_C57BL6NJ_G0034639	218.067	400.392	35.7412	0.0892654	-3.48576	0.000346702	0.0382283	8	118523237	118557812	-	3200	Bcar1	GO:0001726;GO:0001726;GO:0004871;GO:0005515;GO:0005515;GO:0005737;GO:0005737;GO:0005737;GO:0005829;GO:0005886;GO:0005925;GO:0005925;GO:0005925;GO:0007015;GO:0007015;GO:0007155;GO:0007165;GO:0007173;GO:0007173;GO:0007186;GO:0007229;GO:0007229;GO:0008286;GO:0008286;GO:0010595;GO:0015629;GO:0016477;GO:0016477;GO:0016477;GO:0017124;GO:0019901;GO:0019904;GO:0030027;GO:0030036;GO:0030054;GO:0030335;GO:…	K05726	breast cancer anti-estrogen resistance 1[Source:MGI Symbol;Acc:MGI:108091]
MGP_C57BL6NJ_G0034203	48.9991	97.9983	0	0	-Inf	0.000350278	0.0383428	8	73436472	73451988	+	1644	Crlf1	GO:0001657;GO:0001657;GO:0004896;GO:0005125;GO:0005127;GO:0005127;GO:0005576;GO:0005615;GO:0005615;GO:0008284;GO:0009897;GO:0010469;GO:0019221;GO:0019955;GO:0019955;GO:0042531;GO:0042531;GO:0043235;GO:0043524;GO:0046982;GO:0046982;GO:0097058;GO:0097058;GO:0097058;GO:2000672;GO:2000672;	-	cytokine receptor-like factor 1 [Source:MGISymbol;Acc:MGI:1340030]
MGP_C57BL6NJ_G0017011	22.5426	1.56499	43.5203	27.8086	4.79746	0.000357657	0.0388688	1	164768234	165282160	-	24710	Cacna1e	GO:0005216;GO:0005244;GO:0005245;GO:0005262;GO:0005509;GO:0005891;GO:0006811;GO:0006816;GO:0016020;GO:0016020;GO:0016021;GO:0034765;GO:0055085;GO:0070588;GO:0070588;	K04852	calcium channel, voltage-dependent, R type, alpha1E subunit [Source:MGI Symbol;Acc:MGI:106217]
MGP_C57BL6NJ_G0019417	12.7344	0	25.4689	Inf	Inf	0.000363327	0.039203	11	102563213	102586071	-	2488	Tbx21	GO:0000122;GO:0003677;GO:0003677;GO:0003700;GO:0005515;GO:0005515;GO:0005634;GO:0005634;GO:0005634;GO:0005634;GO:0006351;GO:0006355;GO:0006355;GO:0010628;GO:0010628;GO:0030217;GO:0030217;GO:0032703;GO:0032703;GO:0043025;GO:0043025;GO:0043161;GO:0043161;GO:0043565;GO:0044212;GO:0045580;GO:0045580;GO:0045892;GO:0045892;GO:0045893;GO:0045893;GO:0045893;GO:0048304;GO:0048304;GO:0050776;GO:0050776;GO:…	K10166	T-box 21 [Source:MGI Symbol;Acc:MGI:1888984]"
MGP_C57BL6NJ_G0033198	1215.78	372.9	2058.65	5.52066	2.46484	0.000380951	0.0403361	7	111818508	111858738	-	1751	Trim30d	GO:0003674;GO:0004842;GO:0005575;GO:0005622;GO:0006914;GO:0008150;GO:0008270;GO:0016567;GO:0045087;GO:0046872;GO:0046872;GO:0051607;	-	tripartite motif-containing 30D [Source:MGISymbol;Acc:MGI:3035181]
MGP_C57BL6NJ_G0031674	7088.54	2095.46	12081.6	5.76563	2.52748	0.000381048	0.0403361	6	129371478	129385872	+	1558	Clec4a1	GO:0003674;GO:0005575;GO:0008150;GO:0016020;GO:0016021;GO:0030246;	K10057	C-type lectin domain family 4, member a1[Source:MGI Symbol;Acc:MGI:3036291]
MGP_C57BL6NJ_G0025120	41.4402	77.6899	5.19059	0.0668117	-3.90376	0.000382264	0.0403361	19	2481618	2482226	-	609	Ccdc85b	GO:0005515;GO:0005634;GO:0005634;GO:0005634;GO:0005737;GO:0005813;GO:0005813;GO:0005815;GO:0005856;GO:0006351;GO:0006355;GO:0030154;GO:0030308;GO:0030308;GO:0040008;GO:0045599;GO:0045599;GO:0045892;GO:0045892;GO:0045892;	K16758	coiled-coil domain containing 85B [Source:MGISymbol;Acc:MGI:2147607]
MGP_C57BL6NJ_G0029937	39.9402	79.8803	0	0	-Inf	0.000387135	0.0403361	5	38482836	38508099	-	3215	Nsg1	GO:0000139;GO:0001881;GO:0001881;GO:0001921;GO:0005102;GO:0005515;GO:0005764;GO:0005768;GO:0005768;GO:0005768;GO:0005768;GO:0005769;GO:0005770;GO:0005770;GO:0005770;GO:0005783;GO:0005783;GO:0005789;GO:0005794;GO:0006915;GO:0006915;GO:0007212;GO:0010008;GO:0016020;GO:0016021;GO:0016021;GO:0016021;GO:0016197;GO:0016197;GO:0016328;GO:0016328;GO:0030425;GO:0030425;GO:0030659;GO:0031410;GO:0031901;GO:…	-	neuron specific gene family member 1 [Source:MGISymbol;Acc:MGI:109149]
MGP_C57BL6NJ_G0019026	489.65	134.108	845.192	6.30233	2.65589	0.00038718	0.0403361	11	75129864	75144225	+	4657	Xaf1	GO:0005634;GO:0005634;GO:0005737;GO:0005739;GO:0005739;GO:0006915;GO:0006915;GO:0031333;GO:0034097;GO:0035456;GO:0046872;	-	XIAP associated factor 1 [Source:MGISymbol;Acc:MGI:3772572]
MGP_C57BL6NJ_G0025298	1429.15	413.254	2445.05	5.91658	2.56476	0.000395572	0.0409281	19	9306634	9318756	+	3770	Ms4a6b	GO:0003674;GO:0005575;GO:0008150;GO:0016020;GO:0016021;GO:0016021;	K22191	membrane-spanning 4-domains, subfamily A, member 6B[Source:MGI Symbol;Acc:MGI:1917024]
MGP_C57BL6NJ_G0031533	12.5077	0	25.0155	Inf	Inf	0.000408601	0.0417246	6	111783834	111823803	-	3575	Il5ra	GO:0002437;GO:0002437;GO:0004896;GO:0004896;GO:0009897;GO:0016020;GO:0016020;GO:0016021;GO:0019221;GO:0019955;GO:0032674;GO:0032674;GO:0043235;GO:0071310;GO:0071310;	K05067	interleukin 5 receptor, alpha [Source:MGISymbol;Acc:MGI:96558]
MGP_C57BL6NJ_G0023507	527.02	144.362	909.677	6.30135	2.65566	0.000408794	0.0417246	16	101977529	101993053	-	3539	Mx1	GO:0000166;GO:0003924;GO:0005525;GO:0005525;	-	MX dynamin-like GTPase 1 [Source:MGISymbol;Acc:MGI:97243]
MGP_C57BL6NJ_G0019696	29.6778	2.42935	56.9262	23.4327	4.55045	0.000418487	0.0420459	11	112954881	112958302	-	1431	Cd79b	GO:0002250;GO:0002376;GO:0004888;GO:0005515;GO:0005654;GO:0005737;GO:0005794;GO:0005829;GO:0005886;GO:0005886;GO:0005886;GO:0005887;GO:0007166;GO:0009617;GO:0009617;GO:0009897;GO:0009897;GO:0009897;GO:0016020;GO:0016020;GO:0016021;GO:0019815;GO:0019815;GO:0019815;GO:0030183;GO:0042802;GO:0042802;GO:0042802;GO:0042803;GO:0050853;GO:0050853;GO:0050853;GO:0051260;GO:0070062;	K06507	CD79B antigen [Source:MGI Symbol;Acc:MGI:96431]"
MGP_C57BL6NJ_G0021283	15230.5	4751.46	25709.6	5.41087	2.43586	0.000419542	0.0420459	13	107884682	107935754	+	4491	Cd180	GO:0002224;GO:0002322;GO:0002322;GO:0002322;GO:0002376;GO:0004872;GO:0005515;GO:0005615;GO:0005886;GO:0005887;GO:0006954;GO:0006954;GO:0016020;GO:0016021;GO:0031012;GO:0031666;GO:0031666;GO:0031666;GO:0045087;GO:0071222;GO:0071222;GO:0071222;	K06555	CD180 antigen [Source:MGI Symbol;Acc:MGI:1194924]"
MGP_C57BL6NJ_G0016867	80.5842	161.168	0	0	-Inf	0.000422078	0.0420459	1	140458781	140478815	+	3563	Slc45a3	GO:0005575;GO:0006810;GO:0008506;GO:0010907;GO:0015770;GO:0016020;GO:0016021;GO:0016021;GO:0045723;GO:0048713;GO:0055085;GO:0008506;GO:0010907;GO:0015770;GO:0045723;GO:0048713;	K15379	solute carrier family 45, member 3 [Source:MGISymbol;Acc:MGI:1922082]
MGP_C57BL6NJ_G0034848	21.3261	41.7835	0.868656	0.0207894	-5.58801	0.000423075	0.0420459	9	12093467	12110042	-	819	1700012B09Rik	GO:0003674;GO:0008150;GO:0036064;GO:0097546;GO:0097546;GO:0036064;	-	RIKEN cDNA 1700012B09 gene [Source:MGISymbol;Acc:MGI:1916575]
MGP_C57BL6NJ_G0025252	175.889	313.819	37.9594	0.12096	-3.0474	0.00042844	0.0423008	19	7683134	7701255	+	3269	Fads3	GO:0005575;GO:0005783;GO:0005789;GO:0006629;GO:0006629;GO:0006631;GO:0006633;GO:0008150;GO:0016020;GO:0016021;GO:0016021;GO:0016491;GO:0016491;GO:0055114;GO:0055114;	K10225	fatty acid desaturase 3 [Source:MGISymbol;Acc:MGI:1928740]
MGP_C57BL6NJ_G0018950	67.8265	123.62	12.0328	0.0973373	-3.36086	0.000433877	0.0425594	11	72427042	72444529	-	5784	Nlgn2	GO:0001966;GO:0001966;GO:0002087;GO:0004872;GO:0005515;GO:0005515;GO:0005622;GO:0005737;GO:0005886;GO:0005886;GO:0005887;GO:0005887;GO:0007155;GO:0007155;GO:0007158;GO:0007158;GO:0007158;GO:0007416;GO:0007416;GO:0007630;GO:0007630;GO:0008284;GO:0009986;GO:0009986;GO:0009986;GO:0016020;GO:0016020;GO:0016021;GO:0019233;GO:0030054;GO:0032024;GO:0032230;GO:0035176;GO:0035176;GO:0035418;GO:0035418;GO:…	K07378	neuroligin 2 [Source:MGI Symbol;Acc:MGI:2681835]"
MGP_C57BL6NJ_G0024965	21.8303	43.6605	0	0	-Inf	0.000442939	0.042956	18	76485641	76631488	-	5408	Mapk4	GO:0000165;GO:0000166;GO:0004672;GO:0004674;GO:0004707;GO:0004707;GO:0004707;GO:0005524;GO:0005524;GO:0005634;GO:0005634;GO:0005634;GO:0005737;GO:0005737;GO:0005737;GO:0006468;GO:0007049;GO:0010468;GO:0016301;GO:0016310;GO:0016740;GO:0019901;GO:0019901;GO:0035556;GO:0042803;GO:0042803;GO:0046982;GO:0046982;GO:0071310;	K06855	mitogen-activated protein kinase 4 [Source:MGISymbol;Acc:MGI:2444559]
MGP_C57BL6NJ_G0035565	883.977	1512.84	255.114	0.168632	-2.56805	0.000443608	0.042956	9	81271566	81388680	+	6900	Cd109	GO:0001933;GO:0001933;GO:0001942;GO:0001942;GO:0004866;GO:0004867;GO:0005576;GO:0005615;GO:0005615;GO:0005615;GO:0005886;GO:0009986;GO:0010466;GO:0010839;GO:0010839;GO:0010951;GO:0016020;GO:0030414;GO:0030512;GO:0031225;GO:0045616;GO:0045616;GO:0050431;GO:0061045;GO:0072675;GO:0072675;	K06530	CD109 antigen [Source:MGI Symbol;Acc:MGI:2445221]"
MGP_C57BL6NJ_G0027338	60.6861	121.372	0	0	-Inf	0.000456407	0.0439139	2	178331128	178337248	+	1621	Snai1	GO:0000122;GO:0000122;GO:0000122;GO:0000122;GO:0000977;GO:0000977;GO:0001078;GO:0001078;GO:0001227;GO:0001227;GO:0001707;GO:0001707;GO:0001837;GO:0001837;GO:0001837;GO:0003198;GO:0003198;GO:0003676;GO:0003677;GO:0003677;GO:0003700;GO:0005515;GO:0005515;GO:0005634;GO:0005634;GO:0005634;GO:0005634;GO:0005634;GO:0005721;GO:0005721;GO:0005721;GO:0005737;GO:0005737;GO:0005737;GO:0005829;GO:0006355;GO:…	K05707	snail family zinc finger 1 [Source:MGISymbol;Acc:MGI:98330]
MGP_C57BL6NJ_G0031012	65.597	119.524	11.6703	0.09764	-3.35638	0.000470065	0.0449418	6	35911136	36405598	-	6242	Dgki	GO:0000166;GO:0003951;GO:0004143;GO:0004143;GO:0004143;GO:0004143;GO:0005095;GO:0005095;GO:0005524;GO:0005634;GO:0005654;GO:0005737;GO:0005737;GO:0005829;GO:0007165;GO:0007205;GO:0007269;GO:0007269;GO:0008021;GO:0008152;GO:0014069;GO:0016301;GO:0016301;GO:0016310;GO:0016740;GO:0017016;GO:0017016;GO:0032045;GO:0032045;GO:0032991;GO:0034260;GO:0035556;GO:0043025;GO:0043087;GO:0043087;GO:0043197;GO:…	K00901	diacylglycerol kinase, iota [Source:MGISymbol;Acc:MGI:2443430]
MGP_C57BL6NJ_G0033958	67.9883	135.542	0.434328	0.00320437	-8.28574	0.000478888	0.0453106	8	22202774	22244822	+	4372	Sfrp1	GO:0001657;GO:0001657;GO:0001756;GO:0001756;GO:0001756;GO:0001843;GO:0001843;GO:0002244;GO:0004197;GO:0004930;GO:0005109;GO:0005515;GO:0005576;GO:0005578;GO:0005615;GO:0005615;GO:0005615;GO:0005615;GO:0005622;GO:0005829;GO:0005886;GO:0006508;GO:0007186;GO:0007275;GO:0008144;GO:0008201;GO:0008284;GO:0008285;GO:0008584;GO:0008584;GO:0008585;GO:0008585;GO:0009950;GO:0009952;GO:0009952;GO:0009986;GO:…	K02166	secreted frizzled-related protein 1 [Source:MGISymbol;Acc:MGI:892014]
MGP_C57BL6NJ_G0030411	14.7712	29.5423	0	0	-Inf	0.000479922	0.0453106	5	123955760	123972022	-	1950	Hspb8	GO:0005515;GO:0005622;GO:0005634;GO:0005634;GO:0005737;GO:0005737;GO:0005829;GO:0042802;	K08879	heat shock protein 8 [Source:MGISymbol;Acc:MGI:2135756]
MGP_C57BL6NJ_G0024996	18.4597	0.650546	36.2689	55.7515	5.80094	0.000483473	0.0453624	18	80961635	81004664	-	3995	Slc14a1	GO:0005372;GO:0005730;GO:0005886;GO:0005886;GO:0005887;GO:0005887;GO:0006810;GO:0006833;GO:0015204;GO:0015204;GO:0015265;GO:0015265;GO:0015840;GO:0016020;GO:0016021;GO:0016021;GO:0016021;GO:0016323;GO:0043231;GO:0071918;GO:0071918;GO:0071918;GO:0005372;GO:0005886;GO:0006833;GO:0015204;GO:0015840;	K08716	solute carrier family 14 (urea transporter), member1 [Source:MGI Symbol;Acc:MGI:1351654]
MGP_C57BL6NJ_G0028051	24.4078	2.19099	46.6245	21.2801	4.41144	0.000493143	0.0459841	3	101264197	101297438	-	2774	Cd160	GO:0005102;GO:0005886;GO:0007165;GO:0016020;GO:0031225;GO:0032393;GO:0046658;GO:0046658;GO:0050829;GO:0050829;	K06542	CD160 antigen [Source:MGI Symbol;Acc:MGI:1860383]"
MGP_C57BL6NJ_G0035163	671.61	1147.06	196.161	0.171013	-2.54783	0.000503318	0.0466449	9	40140157	40253720	+	4586	Clmp	-	K06789	CXADR-like membrane protein [Source:MGISymbol;Acc:MGI:1918816]
MGP_C57BL6NJ_G0031796	12.1149	0	24.2299	Inf	Inf	0.000510151	0.0469899	6	136973062	136991815	-	3913	Klri2	GO:0003674;GO:0005886;GO:0005887;GO:0008150;GO:0016020;GO:0016021;GO:0030246;	-	killer cell lectin-like receptor family I member 2[Source:MGI Symbol;Acc:MGI:2443965]
MGP_C57BL6NJ_G0032650	12.0788	0	24.1575	Inf	Inf	0.000514778	0.0471287	7	46960401	46966480	-	2870	Spib	GO:0000980;GO:0000981;GO:0001205;GO:0003677;GO:0003700;GO:0003700;GO:0005634;GO:0005634;GO:0005667;GO:0006351;GO:0006355;GO:0006355;GO:0006355;GO:0006357;GO:0006366;GO:0030154;GO:0030225;GO:0043565;GO:0045944;GO:0003700;GO:0006355;GO:0030225;	K09439	Spi-B transcription factor (Spi-1/PU.1 related)[Source:MGI Symbol;Acc:MGI:892986]
MGP_C57BL6NJ_G0031727	12.0395	0	24.079	Inf	Inf	0.000519862	0.0473075	6	131962700	131967079	-	2328	Cd27	GO:0004888;GO:0005031;GO:0005515;GO:0005515;GO:0005515;GO:0005887;GO:0006915;GO:0006954;GO:0006955;GO:0007165;GO:0007275;GO:0009897;GO:0009897;GO:0009897;GO:0009986;GO:0009986;GO:0016020;GO:0016020;GO:0016021;GO:0032496;GO:0033209;GO:0042100;GO:0042127;GO:0043027;GO:0043027;GO:0043027;GO:0043066;GO:0043066;GO:0043066;GO:0043066;GO:0043154;GO:0043154;GO:0045078;GO:0045471;GO:0045579;GO:0045582;GO:…	K05144	CD27 antigen [Source:MGI Symbol;Acc:MGI:88326]"
MGP_C57BL6NJ_G0033713	3304.19	947.366	5661.01	5.97552	2.57907	0.000524981	0.0474872	7	151794393	151798168	-	3020	Irf7	GO:0000978;GO:0000979;GO:0000982;GO:0002376;GO:0002819;GO:0002819;GO:0003677;GO:0003677;GO:0003700;GO:0005515;GO:0005515;GO:0005634;GO:0005634;GO:0005654;GO:0005737;GO:0005737;GO:0005829;GO:0006351;GO:0006355;GO:0006355;GO:0016064;GO:0032481;GO:0032607;GO:0032608;GO:0032727;GO:0032727;GO:0032728;GO:0032728;GO:0034124;GO:0034127;GO:0044212;GO:0045087;GO:0045088;GO:0045351;GO:0045893;GO:0045893;GO:…	K09447	interferon regulatory factor 7 [Source:MGISymbol;Acc:MGI:1859212]
MGP_C57BL6NJ_G0025123	394.278	677.689	110.866	0.163594	-2.61181	0.000544319	0.0489433	19	2498745	2508208	+	2671	Efemp2	GO:0005509;GO:0005576;GO:0005578;GO:0005615;GO:0005615;GO:0030023;GO:0031012;GO:0048251;GO:0062023;GO:0070062;GO:1903561;	-	epidermal growth factor-containing fibulin-likeextracellular matrix protein 2 [Source:MGISymbol;Acc:MGI:1891209]
MGP_C57BL6NJ_G0031549	799.465	1391.1	207.827	0.149398	-2.74277	0.000593916	0.0530869	6	118173162	118425959	-	9841	Srgap3	GO:0005096;GO:0007165;GO:0016020;GO:0016021;GO:0043547;	K07526	SLIT-ROBO Rho GTPase activating protein 3[Source:MGI Symbol;Acc:MGI:2152938]
MGP_C57BL6NJ_G0016997	40.4701	75.7526	5.18769	0.0684821	-3.86813	0.000604148	0.0536839	1	163375286	163447458	-	8129	Lamc2	GO:0005604;GO:0048731;GO:0070831;	K06246	laminin, gamma 2 [Source:MGI Symbol;Acc:MGI:99913]"
MGP_C57BL6NJ_G0023547	54.3516	99.5843	9.11895	0.0915701	-3.44898	0.000609014	0.0537998	17	6293023	6785151	+	12323	Pde10a	GO:0000166;GO:0003824;GO:0004112;GO:0004114;GO:0004114;GO:0004114;GO:0004118;GO:0004118;GO:0005737;GO:0006198;GO:0007165;GO:0008081;GO:0008152;GO:0010738;GO:0010754;GO:0016020;GO:0016787;GO:0030552;GO:0030552;GO:0030553;GO:0043025;GO:0043204;GO:0043949;GO:0043951;GO:0046069;GO:0046872;GO:0047555;GO:0004114;GO:0010738;GO:0043949;	-	phosphodiesterase 10A [Source:MGISymbol;Acc:MGI:1345143]
MGP_C57BL6NJ_G0017503	31.0011	62.0023	0	0	-Inf	0.000629807	0.0553132	10	25851031	26529419	-	16392	Lama2	GO:0005604;GO:0005605;GO:0005615;GO:0007411;GO:0032224;GO:0042383;	K05637	laminin, alpha 2 [Source:MGI Symbol;Acc:MGI:99912]"
MGP_C57BL6NJ_G0022351	24102.5	7663.41	40541.6	5.29028	2.40335	0.000643597	0.0561976	15	77589280	77594134	+	3784	Ly6e	GO:0016020;GO:0016021;	K06846	lymphocyte antigen 6 complex, locus E [Source:MGISymbol;Acc:MGI:106651]
MGP_C57BL6NJ_G0030193	11.6355	0	23.2711	Inf	Inf	0.000652741	0.056538	5	101353349	101357466	+	1150	Cxcl13	GO:0002518;GO:0002518;GO:0002690;GO:0005125;GO:0005576;GO:0005576;GO:0005576;GO:0005576;GO:0005615;GO:0005615;GO:0005615;GO:0005615;GO:0005623;GO:0006935;GO:0006935;GO:0006952;GO:0006954;GO:0006954;GO:0006955;GO:0006955;GO:0007166;GO:0007186;GO:0007204;GO:0007204;GO:0007267;GO:0007267;GO:0008009;GO:0008009;GO:0008009;GO:0008009;GO:0008009;GO:0008201;GO:0008201;GO:0010469;GO:0010820;GO:0010820;GO:…	K10032	chemokine (C-X-C motif) ligand 13 [Source:MGISymbol;Acc:MGI:1888499]
MGP_C57BL6NJ_G0017019	482.152	821.043	143.262	0.174487	-2.51881	0.000654981	0.056538	1	166234473	166271323	-	8291	Qsox1	GO:0005615;	K10758	quiescin Q6 sulfhydryl oxidase 1 [Source:MGISymbol;Acc:MGI:1330818]
MGP_C57BL6NJ_G0031150	672.702	207.875	1137.53	5.47218	2.45212	0.000679485	0.0579195	6	48945697	48953781	+	3810	Tmem176a	GO:0005515;GO:0016020;GO:0016021;GO:0016021;GO:2001199;GO:2001199;	-	transmembrane protein 176A [Source:MGISymbol;Acc:MGI:1913308]
MGP_C57BL6NJ_G0036104	1025.7	320.102	1731.31	5.40861	2.43526	0.000679581	0.0579195	X	16174460	16243355	-	3299	Syn1	GO:0000795;GO:0003779;GO:0003824;GO:0005515;GO:0005524;GO:0005794;GO:0005829;GO:0005856;GO:0007269;GO:0007269;GO:0007269;GO:0008021;GO:0008021;GO:0014069;GO:0019901;GO:0030054;GO:0030424;GO:0030425;GO:0030672;GO:0030672;GO:0043209;GO:0043229;GO:0045202;GO:0045202;GO:0046983;GO:0048172;GO:0048306;GO:0048786;GO:0050808;GO:0097091;GO:0098793;GO:0098850;GO:0098993;GO:0000795;GO:0007269;GO:0014069;GO:…	K19941	synapsin I [Source:MGI Symbol;Acc:MGI:98460]"
MGP_C57BL6NJ_G0033030	278.369	477.784	78.9547	0.165252	-2.59726	0.000682489	0.0579195	7	105968220	106040467	+	7234	Map6	GO:0000226;GO:0005516;GO:0005516;GO:0005737;GO:0005794;GO:0005794;GO:0005798;GO:0005801;GO:0005856;GO:0005874;GO:0005874;GO:0005874;GO:0005874;GO:0006810;GO:0008017;GO:0008017;GO:0008017;GO:0008017;GO:0016020;GO:0019896;GO:0030424;GO:0030424;GO:0030424;GO:0030425;GO:0030425;GO:0030425;GO:0030658;GO:0030705;GO:0031410;GO:0032418;GO:0032418;GO:0032418;GO:0042995;GO:0043005;GO:0048471;GO:0048813;GO:…	K10432	microtubule-associated protein 6 [Source:MGISymbol;Acc:MGI:1201690]
MGP_C57BL6NJ_G0029547	16.869	33.7379	0	0	-Inf	0.000696681	0.0587936	4	157323237	157355448	-	5200	Draxin	GO:0005515;GO:0005576;GO:0005576;GO:0005576;GO:0005576;GO:0005576;GO:0007275;GO:0007411;GO:0007411;GO:0007411;GO:0007411;GO:0016055;GO:0016055;GO:0021516;GO:0021516;GO:0021516;GO:0021528;GO:0021528;GO:0021528;GO:0030517;GO:0030517;GO:0030900;GO:0030900;GO:0030900;GO:0043524;GO:0043524;GO:0090090;GO:0090090;GO:0090090;	-	dorsal inhibitory axon guidance protein [Source:MGISymbol;Acc:MGI:1917683]
MGP_C57BL6NJ_G0027195	24.29	1.92709	46.653	24.209	4.59747	0.000707077	0.0593395	2	166527182	166543284	-	3099	Sla2	GO:0000122;GO:0000122;GO:0002250;GO:0002376;GO:0004715;GO:0005070;GO:0005070;GO:0005070;GO:0005102;GO:0005515;GO:0005654;GO:0005737;GO:0005768;GO:0005770;GO:0005770;GO:0005770;GO:0005794;GO:0005886;GO:0005886;GO:0005886;GO:0005942;GO:0007169;GO:0009966;GO:0009967;GO:0016020;GO:0016477;GO:0030154;GO:0031234;GO:0031410;GO:0031410;GO:0031410;GO:0038083;GO:0042110;GO:0042110;GO:0042127;GO:0043231;GO:…	-	Src-like-adaptor 2 [Source:MGISymbol;Acc:MGI:1925049]
MGP_C57BL6NJ_G0028451	13.9863	27.9726	0	0	-Inf	0.000717306	0.0598653	4	5002401	5110560	-	3881	Car8	GO:0004089;GO:0005515;GO:0005737;GO:0005737;GO:0006730;GO:0008270;GO:0046872;GO:0048015;GO:0048015;	K01672	carbonic anhydrase 8 [Source:MGISymbol;Acc:MGI:88253]
MGP_C57BL6NJ_G0016837	239.725	72.7002	406.75	5.5949	2.48411	0.000739704	0.0613954	1	138712873	138818146	-	2955	-	-	-	-
MGP_C57BL6NJ_G0031800	24.0434	1.90796	46.1789	24.2033	4.59713	0.000755521	0.0623655	6	137351906	137367932	-	1116	Klra6	GO:0005886;GO:0007155;GO:0016020;GO:0016021;GO:0030246;	-	killer cell lectin-like receptor, subfamily A,member 6 [Source:MGI Symbol;Acc:MGI:101902]
MGP_C57BL6NJ_G0017214	7239.79	2373.76	12105.8	5.09986	2.35046	0.000771559	0.0633433	1	185730024	185759522	-	3130	Ifi204	-	K20914	interferon activated gene 204 [Source:MGISymbol;Acc:MGI:96429]
MGP_C57BL6NJ_G0027662	1037.68	330.583	1744.78	5.27789	2.39996	0.000790501	0.0645476	3	60129560	60171070	-	11055	P2ry14	GO:0004871;GO:0004930;GO:0004930;GO:0005886;GO:0005887;GO:0006955;GO:0007165;GO:0007186;GO:0007186;GO:0007186;GO:0016020;GO:0016021;GO:0016021;GO:0035589;GO:0045028;GO:0045028;	K04299	purinergic receptor P2Y, G-protein coupled, 14[Source:MGI Symbol;Acc:MGI:2155705]
MGP_C57BL6NJ_G0032566	150.551	261.366	39.7357	0.152031	-2.71756	0.000805698	0.0654348	7	39589163	39600203	-	5263	Plekhf1	GO:0005634;GO:0005737;GO:0005739;GO:0005764;GO:0005764;GO:0005764;GO:0005768;GO:0006915;GO:0007032;GO:0010314;GO:0010508;GO:0016050;GO:0032266;GO:0035091;GO:0046872;GO:0046872;GO:0046902;GO:0048471;GO:0070273;GO:0072659;GO:2001244;GO:2001244;	-	pleckstrin homology domain containing, family F(with FYVE domain) member 1 [Source:MGISymbol;Acc:MGI:1919537]
MGP_C57BL6NJ_G0034132	1041.91	307.332	1776.49	5.78038	2.53117	0.000818367	0.0656112	8	64204419	64325059	+	6944	Ddx60	GO:0003676;GO:0003690;GO:0003690;GO:0003723;GO:0003725;GO:0003725;GO:0003727;GO:0003727;GO:0005515;GO:0005524;GO:0005737;GO:0005737;GO:0005829;GO:0009615;GO:0009615;GO:0045111;GO:0051607;GO:1900245;GO:1900245;GO:1900246;GO:1900246;GO:0003723;GO:0005737;GO:0051607;	-	DEAD (Asp-Glu-Ala-Asp) box polypeptide 60[Source:MGI Symbol;Acc:MGI:2384570]
MGP_C57BL6NJ_G0021216	2702.65	4534.53	870.76	0.192028	-2.38061	0.000818645	0.0656112	13	98046619	98239445	+	3989	Arsb	GO:0003824;GO:0008152;GO:0008484;	K01135	arylsulfatase B [Source:MGI Symbol;Acc:MGI:88075]"
MGP_C57BL6NJ_G0025474	1932.2	591.646	3272.76	5.53161	2.4677	0.0008209	0.0656112	19	34249436	34281932	+	3927	Ifit2	GO:0035457;	-	interferon-induced protein with tetratricopeptiderepeats 2 [Source:MGI Symbol;Acc:MGI:99449]
MGP_C57BL6NJ_G0028090	151.228	263.097	39.3603	0.149604	-2.74078	0.000833386	0.0662586	3	106319423	106411033	+	8471	Igsf3	-	K06522	immunoglobulin superfamily, member 3 [Source:MGISymbol;Acc:MGI:1926158]
MGP_C57BL6NJ_G0028318	714.259	1352.74	75.7737	0.0560148	-4.15805	0.000842124	0.0663702	3	143018872	143057977	+	5347	Slc9b2	GO:0005739;GO:0005743;GO:0005768;GO:0005886;GO:0005886;GO:0005929;GO:0006810;GO:0006811;GO:0006812;GO:0006814;GO:0006814;GO:0006814;GO:0010008;GO:0010348;GO:0010348;GO:0015297;GO:0015299;GO:0015385;GO:0015385;GO:0015992;GO:0016020;GO:0016021;GO:0016021;GO:0016323;GO:0030054;GO:0030317;GO:0030672;GO:0031410;GO:0031514;GO:0031966;GO:0035725;GO:0042802;GO:0042995;GO:0045202;GO:0055085;GO:0061178;GO:…	-	solute carrier family 9, subfamily B (NHA2, cationproton antiporter 2), member 2 [Source:MGISymbol;Acc:MGI:2140077]
MGP_C57BL6NJ_G0030180	212.273	64.0705	360.476	5.62624	2.49217	0.000843578	0.0663702	5	97242477	97245742	-	2252	Cxcl10	GO:0005615;GO:0009617;GO:0009897;GO:0045662;GO:0051607;GO:1901740;	K12671	chemokine (C-X-C motif) ligand 10 [Source:MGISymbol;Acc:MGI:1352450]
MGP_C57BL6NJ_G0033761	481.71	898.25	65.1694	0.0725516	-3.78485	0.000848349	0.0663998	7	153697398	153712595	+	2270	Cd81	GO:0000187;GO:0000187;GO:0001618;GO:0001772;GO:0005178;GO:0005178;GO:0005515;GO:0005515;GO:0005886;GO:0005887;GO:0005887;GO:0005887;GO:0005925;GO:0007166;GO:0008104;GO:0008104;GO:0008284;GO:0016020;GO:0016020;GO:0016020;GO:0016021;GO:0016021;GO:0016021;GO:0016323;GO:0016323;GO:0016324;GO:0023026;GO:0030307;GO:0030890;GO:0030890;GO:0031623;GO:0031623;GO:0031647;GO:0031982;GO:0042127;GO:0043128;GO:…	K06508	CD81 antigen [Source:MGI Symbol;Acc:MGI:1096398]"
MGP_C57BL6NJ_G0029972	245.14	422.113	68.168	0.161492	-2.63046	0.0008577	0.0667857	5	50948666	51051791	-	8113	Adgra3	GO:0004871;GO:0004888;GO:0004930;GO:0004930;GO:0007165;GO:0007166;GO:0007186;GO:0007186;GO:0009897;GO:0009897;GO:0016020;GO:0016020;GO:0016021;GO:0016021;	K08462	adhesion G protein-coupled receptor A3 [Source:MGISymbol;Acc:MGI:1917943]
MGP_C57BL6NJ_G0028829	25.8875	51.7751	0	0	-Inf	0.000913034	0.0703677	4	89074712	89459229	+	10869	Adamtsl1	-	-	ADAMTS-like 1 [Source:MGI Symbol;Acc:MGI:1924989]"
MGP_C57BL6NJ_G0031783	74.7502	16.3291	133.171	8.15544	3.02776	0.000915109	0.0703677	6	136562691	136575726	+	4793	Clec1b	GO:0004888;GO:0004888;GO:0005887;GO:0007166;GO:0016020;GO:0016021;GO:0023014;GO:0023014;GO:0030220;GO:0030246;GO:0005887;GO:0030220;	-	C-type lectin domain family 1, member b [Source:MGISymbol;Acc:MGI:1913287]
MGP_C57BL6NJ_G0020488	13.4607	26.9213	0	0	-Inf	0.000917678	0.0703677	12	113801337	113830190	+	2605	Hhipl1	GO:0003824;GO:0005044;GO:0005576;GO:0006898;GO:0008150;GO:0016020;	-	hedgehog interacting protein-like 1 [Source:MGISymbol;Acc:MGI:1919265]
MGP_C57BL6NJ_G0029650	26.439	52.0094	0.868656	0.0167019	-5.90384	0.000922939	0.0704137	4	165682553	165685282	-	2340	Mmp23	GO:0000003;GO:0004222;GO:0004222;GO:0004222;GO:0005783;GO:0005789;GO:0006508;GO:0006508;GO:0006508;GO:0008233;GO:0008237;GO:0008270;GO:0016020;GO:0016021;GO:0016787;GO:0031012;GO:0046872;	K08001	matrix metallopeptidase 23 [Source:MGISymbol;Acc:MGI:1347361]
MGP_C57BL6NJ_G0029929	19.6969	0	39.3939	Inf	Inf	0.000977225	0.0741807	5	37284282	37413722	+	9044	Jakmip1	GO:0003723;GO:0003729;GO:0005737;GO:0005856;GO:0005874;GO:0006810;GO:0008017;GO:0015031;GO:0015630;GO:0016020;GO:0016021;GO:0019894;GO:0019898;GO:0019900;GO:0021756;GO:0021756;GO:0030529;GO:0035770;GO:0045182;GO:0050811;GO:0050890;GO:0051094;GO:1990904;GO:2000767;GO:2000767;GO:0003729;GO:0019894;GO:0021756;GO:0035770;GO:0045182;GO:0051094;GO:2000767;	-	janus kinase and microtubule interacting protein 1[Source:MGI Symbol;Acc:MGI:1923321]
MGP_C57BL6NJ_G0016394	854.617	1438.74	270.495	0.188009	-2.41113	0.000989834	0.0744579	1	53424046	53593225	-	10792	Myo1b	GO:0000146;GO:0000146;GO:0000166;GO:0003774;GO:0003774;GO:0003774;GO:0003777;GO:0003779;GO:0003779;GO:0005516;GO:0005516;GO:0005524;GO:0005524;GO:0005524;GO:0005546;GO:0005546;GO:0005547;GO:0005547;GO:0005737;GO:0005737;GO:0005769;GO:0005884;GO:0005886;GO:0005886;GO:0005903;GO:0005903;GO:0006892;GO:0007015;GO:0007018;GO:0008017;GO:0010008;GO:0016459;GO:0016459;GO:0030048;GO:0030048;GO:0030175;GO:…	K10356	myosin IB [Source:MGI Symbol;Acc:MGI:107752]"
MGP_C57BL6NJ_G0024840	4162.25	7303.36	1021.14	0.139818	-2.83838	0.000999715	0.0744579	18	53381212	53398983	-	4810	Lox	GO:0001568;GO:0001568;GO:0004720;GO:0004720;GO:0004720;GO:0004720;GO:0005507;GO:0005507;GO:0005515;GO:0005515;GO:0005576;GO:0005576;GO:0005578;GO:0005578;GO:0005581;GO:0005581;GO:0005615;GO:0005615;GO:0005615;GO:0005615;GO:0005634;GO:0007507;GO:0007507;GO:0009725;GO:0016491;GO:0016641;GO:0018057;GO:0030199;GO:0030199;GO:0030324;GO:0030324;GO:0031012;GO:0031012;GO:0035904;GO:0035904;GO:0042060;GO:…	K00277	lysyl oxidase [Source:MGI Symbol;Acc:MGI:96817]"
MGP_C57BL6NJ_G0030443	1295.67	417.698	2173.64	5.20387	2.37959	0.000999844	0.0744579	5	128785906	128806057	-	4451	Oas2	GO:0000166;GO:0001730;GO:0001730;GO:0001730;GO:0002376;GO:0003723;GO:0003723;GO:0003725;GO:0003725;GO:0003725;GO:0005524;GO:0005524;GO:0005524;GO:0005634;GO:0005634;GO:0005654;GO:0005654;GO:0005737;GO:0005737;GO:0005739;GO:0005783;GO:0005829;GO:0005829;GO:0006164;GO:0006401;GO:0006486;GO:0006486;GO:0006955;GO:0008270;GO:0009615;GO:0009617;GO:0016020;GO:0016740;GO:0016740;GO:0016779;GO:0016779;GO:…	K14216	2'-5' oligoadenylate synthetase 2 [Source:MGISymbol;Acc:MGI:2180852]
MGP_C57BL6NJ_G0031960	33.1256	66.2511	0	0	-Inf	0.00100059	0.0744579	7	238746	282269	+	2470	Cacng7	GO:0005244;GO:0005245;GO:0005246;GO:0005246;GO:0005262;GO:0005737;GO:0005769;GO:0005886;GO:0006810;GO:0006811;GO:0006816;GO:0006816;GO:0016020;GO:0016020;GO:0016021;GO:0016021;GO:0016247;GO:0019226;GO:0032281;GO:0032281;GO:0032281;GO:0034765;GO:0043005;GO:0043025;GO:0043488;GO:0044300;GO:0051968;GO:0070588;GO:0070588;GO:0098839;GO:0098943;GO:0098970;GO:0098978;GO:0099061;GO:0099590;GO:1903861;GO:…	K04872	calcium channel, voltage-dependent, gamma subunit 7[Source:MGI Symbol;Acc:MGI:1932374]
MGP_C57BL6NJ_G0036507	16.5889	0.938995	32.2387	34.3333	5.10153	0.00102905	0.0762	X	106933028	106949510	+	2982	P2ry10	GO:0004871;GO:0004930;GO:0004930;GO:0004930;GO:0005886;GO:0005887;GO:0007165;GO:0007186;GO:0007186;GO:0016020;GO:0016021;GO:0016021;GO:0035025;GO:0035589;GO:0045028;GO:0051482;	K04274	purinergic receptor P2Y, G-protein coupled 10[Source:MGI Symbol;Acc:MGI:1926076]
MGP_C57BL6NJ_G0035725	63.078	117.477	8.6788	0.0738764	-3.75874	0.00104364	0.0769033	9	111245840	111258417	+	4245	-	-	-	-
MGP_C57BL6NJ_G0026909	72.8535	136.218	9.48927	0.0696625	-3.84347	0.00108861	0.0798281	2	136904604	136911167	-	1907	Il1b	GO:0000122;GO:0000122;GO:0000165;GO:0000165;GO:0000187;GO:0000187;GO:0001660;GO:0001660;GO:0001666;GO:0001934;GO:0002439;GO:0005125;GO:0005125;GO:0005125;GO:0005125;GO:0005125;GO:0005149;GO:0005149;GO:0005178;GO:0005178;GO:0005576;GO:0005576;GO:0005576;GO:0005615;GO:0005615;GO:0005615;GO:0005615;GO:0005615;GO:0005615;GO:0005737;GO:0005764;GO:0005776;GO:0005829;GO:0006954;GO:0006954;GO:0006954;GO:…	K04519	interleukin 1 beta [Source:MGISymbol;Acc:MGI:96543]
MGP_C57BL6NJ_G0025989	36.446	67.6917	5.20029	0.0768231	-3.70232	0.00109639	0.0800099	2	29645280	29647959	-	2680	Ier5l	GO:0003674;GO:0005575;GO:0008150;	-	immediate early response 5-like [Source:MGISymbol;Acc:MGI:1919750]
MGP_C57BL6NJ_G0022499	1671.19	566.364	2776.01	4.90147	2.29321	0.00110879	0.0805256	15	83347080	83372304	+	5613	Apobec3	GO:0002244;GO:0002376;GO:0003723;GO:0003723;GO:0003824;GO:0004126;GO:0005515;GO:0005634;GO:0005634;GO:0005737;GO:0005737;GO:0008270;GO:0009972;GO:0010529;GO:0010529;GO:0016554;GO:0016787;GO:0016787;GO:0016814;GO:0045071;GO:0045087;GO:0046872;GO:0047844;GO:0050688;GO:0051607;GO:0051607;GO:0080111;GO:1903900;	-	apolipoprotein B mRNA editing enzyme, catalyticpolypeptide 3 [Source:MGI Symbol;Acc:MGI:1933111]
MGP_C57BL6NJ_G0025779	43.4774	80.0136	6.94117	0.0867499	-3.52699	0.00112491	0.0813057	2	12429093	12827803	+	13170	Cacnb2	GO:0005891;GO:0007268;GO:0007601;GO:0051015;	K04863	calcium channel, voltage-dependent, beta 2 subunit[Source:MGI Symbol;Acc:MGI:894644]
MGP_C57BL6NJ_G0021992	2001.15	657.134	3345.17	5.09054	2.34782	0.00114678	0.0824916	14	76058099	76167760	+	2318	Epsti1	-	-	epithelial stromal interaction 1 (breast)[Source:MGI Symbol;Acc:MGI:1915168]
MGP_C57BL6NJ_G0017036	26.1361	49.6964	2.5759	0.0518328	-4.26999	0.0011555	0.0827247	1	168111500	168178836	+	5410	Sec16b	GO:0000139;GO:0003674;GO:0005783;GO:0005789;GO:0005794;GO:0006810;GO:0007029;GO:0007029;GO:0007030;GO:0007031;GO:0010628;GO:0012507;GO:0015031;GO:0016020;GO:0016192;GO:0016559;GO:0043231;GO:0048208;GO:0048208;GO:0070863;GO:0070863;GO:0070971;GO:0070973;	K20353	SEC16 homolog B (S. cerevisiae) [Source:MGISymbol;Acc:MGI:2148802]
MGP_C57BL6NJ_G0030739	63.5738	14.6085	112.539	7.70366	2.94554	0.0011809	0.084145	5	151394880	151542404	-	4866	Card11	GO:0001772;GO:0001772;GO:0001819;GO:0002377;GO:0002377;GO:0005515;GO:0005737;GO:0005737;GO:0005886;GO:0005886;GO:0005886;GO:0007165;GO:0007165;GO:0007249;GO:0007249;GO:0016020;GO:0030183;GO:0030183;GO:0030890;GO:0030890;GO:0031295;GO:0031295;GO:0032449;GO:0032449;GO:0038202;GO:0038202;GO:0042100;GO:0042100;GO:0042101;GO:0042102;GO:0042102;GO:0042110;GO:0042110;GO:0042981;GO:0043123;GO:0043123;GO:…	K07367	caspase recruitment domain family, member 11[Source:MGI Symbol;Acc:MGI:1916978]
MGP_C57BL6NJ_G0025103	68.1082	125.85	10.3663	0.0823703	-3.60173	0.00121968	0.0865	19	2055381	2069769	-	4807	Tmem151a	-	-	transmembrane protein 151A [Source:MGISymbol;Acc:MGI:2147713]
MGP_C57BL6NJ_G0016632	140.413	39.6123	241.214	6.08937	2.60629	0.0012401	0.087537	1	90491355	90513985	-	3722	Gpr55	GO:0004871;GO:0004930;GO:0004930;GO:0004930;GO:0004949;GO:0004949;GO:0005886;GO:0005887;GO:0005887;GO:0005887;GO:0007165;GO:0007186;GO:0007186;GO:0007202;GO:0007202;GO:0007202;GO:0016020;GO:0016021;GO:0016021;GO:0035025;GO:0035025;GO:0035025;GO:0038171;GO:0045453;GO:0045671;GO:0051482;GO:0070374;GO:0070374;	K08413	G protein-coupled receptor 55 [Source:MGISymbol;Acc:MGI:2685064]
MGP_C57BL6NJ_G0026617	20.7087	41.4174	0	0	-Inf	0.00125979	0.088168	2	107875818	107878951	-	3134	Fjx1	GO:0005576;GO:0005615;GO:0005615;GO:0005615;GO:0007267;GO:0010842;GO:0010842;	K16674	four jointed box 1 (Drosophila) [Source:MGISymbol;Acc:MGI:1341907]
MGP_C57BL6NJ_G0025273	14.5251	0.625996	28.4242	45.4063	5.50482	0.0012659	0.088168	19	8512776	8554862	-	3404	Cd6	GO:0001530;GO:0001530;GO:0001771;GO:0001771;GO:0001772;GO:0001772;GO:0001934;GO:0002438;GO:0002438;GO:0005044;GO:0005515;GO:0005515;GO:0005886;GO:0006898;GO:0007155;GO:0007157;GO:0007157;GO:0009897;GO:0016020;GO:0016020;GO:0016021;GO:0019901;GO:0031226;GO:0031226;GO:0031663;GO:0031663;GO:0032496;GO:0032496;GO:0042101;GO:0042101;GO:0042102;GO:0042102;GO:0042802;GO:0044214;GO:0070891;GO:0070891;GO:…	K06456	CD6 antigen [Source:MGI Symbol;Acc:MGI:103566]"
MGP_C57BL6NJ_G0032165	20.3974	39.5161	1.27874	0.03236	-4.94964	0.00126655	0.088168	7	15359748	15371940	+	2989	Dact3	GO:0005080;GO:0005080;GO:0005080;GO:0005515;GO:0005737;GO:0005737;GO:0005737;GO:0008013;GO:0010719;GO:0010719;GO:0016055;GO:0030111;GO:0030178;GO:0030178;GO:0030308;GO:0030308;GO:0035414;GO:0035414;GO:0042802;GO:0042802;GO:0051018;GO:0051018;GO:0051018;GO:0070097;GO:0070097;GO:0070097;GO:0090090;GO:0090090;GO:0090090;	K22154	dishevelled-binding antagonist of beta-catenin 3[Source:MGI Symbol;Acc:MGI:3654828]
MGP_C57BL6NJ_G0022183	29.6467	55.8754	3.41806	0.0611729	-4.03096	0.00127242	0.0881705	15	33849730	33992242	+	3583	Matn2	GO:0001764;GO:0001764;GO:0003429;GO:0005201;GO:0005509;GO:0005576;GO:0005578;GO:0005578;GO:0005604;GO:0005604;GO:0005615;GO:0005615;GO:0005615;GO:0007411;GO:0007411;GO:0008347;GO:0008347;GO:0031012;GO:0031012;GO:0031012;GO:0031104;GO:0031104;GO:0031175;GO:0031175;GO:0048678;GO:0048678;GO:0062023;	-	matrilin 2 [Source:MGI Symbol;Acc:MGI:109613]"
MGP_C57BL6NJ_G0021247	50.9318	94.5124	7.35125	0.0777809	-3.68444	0.00131493	0.0905927	13	102573375	102915233	-	6259	Arhgef28	GO:0005085;GO:0005089;GO:0005622;GO:0035023;GO:0035556;GO:0046872;GO:0065009;	K21072	Rho guanine nucleotide exchange factor (GEF) 28[Source:MGI Symbol;Acc:MGI:1346016]
MGP_C57BL6NJ_G0030208	20.6249	41.2497	0	0	-Inf	0.00131937	0.0905927	5	104526568	104641897	-	5347	Prkg2	GO:0000166;GO:0004672;GO:0004674;GO:0004674;GO:0004692;GO:0004692;GO:0005524;GO:0005524;GO:0006468;GO:0016301;GO:0016310;GO:0016740;GO:0030553;	K19477	protein kinase, cGMP-dependent, type II [Source:MGISymbol;Acc:MGI:108173]
MGP_C57BL6NJ_G0023263	12.5903	0.216849	24.9638	115.121	6.847	0.0013317	0.0906382	16	44992988	45023506	+	3257	Btla	GO:0002768;GO:0005887;GO:0016020;GO:0016021;GO:0038023;	K06707	B and T lymphocyte associated [Source:MGISymbol;Acc:MGI:2658978]
MGP_C57BL6NJ_G0020499	189.491	374.221	4.76145	0.0127236	-6.29635	0.00133203	0.0906382	12	115078997	115089655	+	5715	Dlk1	-	-	delta-like 1 homolog (Drosophila) [Source:MGISymbol;Acc:MGI:94900]
MGP_C57BL6NJ_G0034757	36.2016	72.4031	0	0	-Inf	0.00134017	0.090783	8	131818454	131821422	-	1433	Acta1	GO:0000166;GO:0001725;GO:0001725;GO:0005515;GO:0005524;GO:0005615;GO:0005737;GO:0005737;GO:0005856;GO:0005865;GO:0005865;GO:0005884;GO:0005884;GO:0010628;GO:0015629;GO:0030017;GO:0030027;GO:0030175;GO:0030240;GO:0030240;GO:0032991;GO:0043234;GO:0044297;GO:0048741;GO:0048741;GO:0070062;GO:0072562;GO:0090131;	K10354	actin, alpha 1, skeletal muscle [Source:MGISymbol;Acc:MGI:87902]
MGP_C57BL6NJ_G0031338	55.6481	12.6374	98.6588	7.80687	2.96474	0.00140865	0.0942005	6	82848382	82848830	+	449	Gm20594	GO:0005576;GO:0048019;GO:1900116;GO:1900118;	-	predicted gene, 20594 [Source:MGISymbol;Acc:MGI:5295700]
MGP_C57BL6NJ_G0020984	178.2	303.761	52.6379	0.173287	-2.52877	0.00141266	0.0942005	13	56641458	56660371	-	4849	Pdlim7	GO:0001503;GO:0001725;GO:0001726;GO:0005515;GO:0005634;GO:0005737;GO:0005737;GO:0005856;GO:0005913;GO:0005925;GO:0007275;GO:0015629;GO:0030036;GO:0030154;GO:0045669;GO:0046872;GO:0001725;GO:0001726;GO:0005737;GO:0030036;	-	PDZ and LIM domain 7 [Source:MGISymbol;Acc:MGI:1914649]
MGP_C57BL6NJ_G0031149	815.281	270.102	1360.46	5.03685	2.33252	0.00141402	0.0942005	6	48938593	48946274	-	1778	Tmem176b	GO:0005515;GO:0005634;GO:0016020;GO:0016021;GO:0016021;GO:0030154;GO:0031965;GO:2001199;GO:2001199;	-	transmembrane protein 176B [Source:MGISymbol;Acc:MGI:1916348]
MGP_C57BL6NJ_G0018373	49.3757	89.3028	9.44855	0.105803	-3.24054	0.00141556	0.0942005	11	1230789	1234973	+	1574	Gatsl3	GO:0005737;GO:0005829;GO:0005829;GO:0005829;GO:0034618;GO:0034618;GO:0034618;GO:0042802;GO:0061700;GO:0061700;GO:1902531;GO:1903432;GO:1903577;GO:1903577;GO:1903577;GO:1904262;GO:1904262;GO:1904262;	K23080	GATS protein-like 3 [Source:MGISymbol;Acc:MGI:1919212]
MGP_C57BL6NJ_G0027665	43.7428	8.76634	78.7192	8.97971	3.16667	0.00143006	0.0944489	3	60233616	60281804	-	2546	P2ry12	GO:0001609;GO:0001609;GO:0001621;GO:0001621;GO:0001973;GO:0001973;GO:0004871;GO:0004930;GO:0004930;GO:0005739;GO:0005886;GO:0005886;GO:0005886;GO:0005887;GO:0005887;GO:0005901;GO:0006930;GO:0006930;GO:0007165;GO:0007186;GO:0007186;GO:0007186;GO:0007186;GO:0007188;GO:0007188;GO:0007193;GO:0007193;GO:0007200;GO:0007596;GO:0007596;GO:0007599;GO:0008347;GO:0009897;GO:0009925;GO:0009986;GO:0010700;GO:…	K04298	purinergic receptor P2Y, G-protein coupled 12[Source:MGI Symbol;Acc:MGI:1918089]
MGP_C57BL6NJ_G0018344	15.7987	0.938995	30.6585	32.6503	5.02903	0.00144391	0.0944489	10	138829914	138880678	+	1694	Tespa1	GO:0003674;GO:0005102;GO:0005737;GO:0005737;GO:0005737;GO:0005783;GO:0005789;GO:0008180;GO:0008180;GO:0010387;GO:0010387;GO:0010387;GO:0016020;GO:0033089;GO:0033089;GO:0050862;GO:0050862;GO:0050862;GO:0050862;	-	thymocyte expressed, positive selection associated1 [Source:MGI Symbol;Acc:MGI:1914846]
MGP_C57BL6NJ_G0024364	14491.2	4753.27	24229.2	5.09737	2.34975	0.00144396	0.0944489	17	61267678	61293597	-	5143	C3	GO:0001798;GO:0001798;GO:0001934;GO:0001934;GO:0001970;GO:0001970;GO:0002376;GO:0004866;GO:0005515;GO:0005515;GO:0005576;GO:0005576;GO:0005615;GO:0005615;GO:0005615;GO:0005615;GO:0006629;GO:0006631;GO:0006911;GO:0006911;GO:0006954;GO:0006954;GO:0006956;GO:0006956;GO:0006956;GO:0006957;GO:0006958;GO:0007596;GO:0008289;GO:0009617;GO:0009617;GO:0010575;GO:0010828;GO:0010828;GO:0010866;GO:0010866;GO:…	K03990	complement component 3 [Source:MGISymbol;Acc:MGI:88227]
MGP_C57BL6NJ_G0030859	236.338	468.333	4.34328	0.00927391	-6.75261	0.00144726	0.0944489	6	429031	507974	-	3912	Calcr	GO:0001635;GO:0001669;GO:0004871;GO:0004872;GO:0004888;GO:0004930;GO:0004930;GO:0004948;GO:0004948;GO:0004948;GO:0005886;GO:0005929;GO:0007165;GO:0007166;GO:0007186;GO:0007186;GO:0007188;GO:0007189;GO:0007204;GO:0007204;GO:0008565;GO:0010628;GO:0010739;GO:0010942;GO:0015031;GO:0016020;GO:0016020;GO:0016021;GO:0016021;GO:0030279;GO:0030316;GO:0030424;GO:0030424;GO:0030816;GO:0030819;GO:0031623;GO:…	K04576	calcitonin receptor [Source:MGISymbol;Acc:MGI:101950]
MGP_C57BL6NJ_G0024392	19.5006	39.0012	0	0	-Inf	0.00145056	0.0944489	17	71168416	71289031	-	9280	Mtcl1	GO:0000922;GO:0000922;GO:0000922;GO:0001578;GO:0003723;GO:0005615;GO:0005737;GO:0005856;GO:0005856;GO:0005886;GO:0008017;GO:0008017;GO:0010506;GO:0016020;GO:0016324;GO:0016327;GO:0016328;GO:0016328;GO:0030496;GO:0030496;GO:0030496;GO:0042803;GO:0042803;GO:0045197;GO:0097427;	-	microtubule crosslinking factor 1 [Source:MGISymbol;Acc:MGI:1915867]
MGP_C57BL6NJ_G0022162	1761.35	3099.1	423.592	0.136682	-2.8711	0.00145832	0.094547	15	26579698	26715700	+	3608	Ank	GO:0005315;GO:0005886;GO:0005886;GO:0005887;GO:0005887;GO:0006810;GO:0006817;GO:0015114;GO:0016020;GO:0016021;GO:0016021;GO:0016021;GO:0016021;GO:0030500;GO:0030500;GO:0030500;GO:0030504;GO:0030504;GO:0030504;GO:0030505;GO:0035435;	K22734	progressive ankylosis [Source:MGISymbol;Acc:MGI:3045421]
MGP_C57BL6NJ_G0031516	3627.08	1313.68	5940.48	4.52202	2.17697	0.00147526	0.0952365	6	101636757	101992043	-	14289	Frmd4b	GO:0001726;GO:0001726;GO:0005515;GO:0005615;GO:0005737;GO:0005737;GO:0005737;GO:0005856;GO:0005856;GO:0005912;GO:0005912;GO:0005923;GO:0005923;GO:0030054;GO:0090162;GO:0090162;	-	FERM domain containing 4B [Source:MGISymbol;Acc:MGI:2141794]
MGP_C57BL6NJ_G0020394	1075.89	385.121	1766.66	4.5873	2.19764	0.00149084	0.0958323	12	102659358	102667296	+	2049	Gpr65	GO:0004871;GO:0004930;GO:0004930;GO:0005622;GO:0007165;GO:0007186;GO:0007186;GO:0016020;GO:0016021;GO:0016021;	K08416	G-protein coupled receptor 65 [Source:MGISymbol;Acc:MGI:108031]
MGP_C57BL6NJ_G0035948	31.3925	58.4436	4.34134	0.0742825	-3.75083	0.00150765	0.0963941	9	128132836	128144545	+	6353	Zfp651	GO:0003674;GO:0003676;GO:0005575;GO:0005634;GO:0006974;GO:0008150;	K10518	zinc finger protein 651 [Source:MGISymbol;Acc:MGI:2670992]
MGP_C57BL6NJ_G0017057	10.1396	0	20.2793	Inf	Inf	0.00151234	0.0963941	1	172729614	172739012	-	1937	Fasl	GO:0000122;GO:0000122;GO:0005123;GO:0005125;GO:0005164;GO:0005164;GO:0005515;GO:0005576;GO:0005615;GO:0005615;GO:0005634;GO:0005634;GO:0005764;GO:0005886;GO:0005886;GO:0005901;GO:0006351;GO:0006355;GO:0006915;GO:0006915;GO:0006919;GO:0006925;GO:0006955;GO:0008284;GO:0008625;GO:0008625;GO:0009897;GO:0009897;GO:0009986;GO:0009986;GO:0010469;GO:0016020;GO:0016020;GO:0016021;GO:0016525;GO:0030644;GO:…	K04389	Fas ligand (TNF superfamily, member 6) [Source:MGISymbol;Acc:MGI:99255]
MGP_C57BL6NJ_G0022511	23.6109	2.34166	44.8801	19.1659	4.26047	0.00162322	0.103027	15	84174000	84203281	+	3168	Grap2	GO:0004715;GO:0005102;GO:0005515;GO:0005515;GO:0005634;GO:0005634;GO:0005737;GO:0005737;GO:0005768;GO:0005768;GO:0007169;GO:0016477;GO:0030154;GO:0031234;GO:0038083;GO:0042127;GO:0045087;	K07366	GRB2-related adaptor protein 2 [Source:MGISymbol;Acc:MGI:1333842]
MGP_C57BL6NJ_G0028898	10.3605	0	20.721	Inf	Inf	0.00163672	0.103351	4	103011924	103027081	+	3580	Angptl3	GO:0001525;GO:0004857;GO:0004857;GO:0004859;GO:0005178;GO:0005178;GO:0005576;GO:0005576;GO:0005615;GO:0005769;GO:0005769;GO:0005794;GO:0005794;GO:0006071;GO:0006629;GO:0006631;GO:0006641;GO:0006644;GO:0007155;GO:0007160;GO:0007160;GO:0007165;GO:0008083;GO:0008201;GO:0008203;GO:0009395;GO:0009986;GO:0009986;GO:0010469;GO:0010519;GO:0010519;GO:0010519;GO:0019915;GO:0030027;GO:0030335;GO:0030335;GO:…	K22288	angiopoietin-like 3 [Source:MGISymbol;Acc:MGI:1353627]
MGP_C57BL6NJ_G0026147	387.812	132.062	643.562	4.87318	2.28486	0.0016491	0.103351	2	52750272	52779482	-	2001	Nmi	GO:0003712;GO:0005515;GO:0005654;GO:0005737;GO:0005737;GO:0005829;GO:0006366;GO:0032480;GO:0032480;GO:0042802;GO:0045355;GO:0045355;GO:0045358;GO:0045358;GO:0045824;GO:0045824;GO:0060333;GO:1902524;GO:1902524;GO:1903506;	-	N-myc (and STAT) interactor [Source:MGISymbol;Acc:MGI:1928368]
MGP_C57BL6NJ_G0024303	37.764	7.17392	68.3541	9.52814	3.25219	0.00165129	0.103351	17	59632635	59738169	+	3491	Adgre4	GO:0004871;GO:0004888;GO:0004930;GO:0004930;GO:0004930;GO:0005509;GO:0005622;GO:0005886;GO:0005887;GO:0005887;GO:0007165;GO:0007166;GO:0007173;GO:0007186;GO:0007186;GO:0007189;GO:0009986;GO:0009986;GO:0016020;GO:0016021;GO:0016021;	K08445	adhesion G protein-coupled receptor E4 [Source:MGISymbol;Acc:MGI:1196464]
MGP_C57BL6NJ_G0024628	59.4153	105.801	13.0298	0.123155	-3.02146	0.00165569	0.103351	18	31125548	31155505	+	1732	Lims2	GO:0003674;GO:0005886;GO:0005925;GO:0005925;GO:0005925;GO:0016020;GO:0030054;GO:0043066;GO:0043066;GO:0045216;GO:0045216;GO:0046872;GO:0050680;GO:0050680;GO:0098609;GO:0098609;GO:2000178;GO:2000178;GO:2000346;GO:2000346;GO:2001046;GO:2001046;	-	LIM and senescent cell antigen like domains 2[Source:MGI Symbol;Acc:MGI:2385067]
MGP_C57BL6NJ_G0030743	12.0548	24.1096	0	0	-Inf	0.00170669	0.106095	5	153137227	153209812	-	4632	Radil	GO:0005515;GO:0005874;GO:0007155;GO:0007165;GO:0007275;GO:0034446;	-	Ras association and DIL domains [Source:MGISymbol;Acc:MGI:2443088]
MGP_C57BL6NJ_G0022435	9.89822	0	19.7964	Inf	Inf	0.00172332	0.10669	15	80767367	80778446	+	2048	Apol7c	GO:0005575;GO:0005576;GO:0006869;GO:0008289;GO:0008289;GO:0042157;	K14480	apolipoprotein L 7c [Source:MGISymbol;Acc:MGI:1920912]
MGP_C57BL6NJ_G0016625	2458.11	872.155	4044.06	4.63686	2.21315	0.0017351	0.106981	1	90088011	90223832	+	7460	-	-	K15413	-
MGP_C57BL6NJ_G0018826	12.099	24.1979	0	0	-Inf	0.00176835	0.108588	11	63093023	63103907	+	1942	Aldh3a1	GO:0001666;GO:0004028;GO:0004028;GO:0004029;GO:0004029;GO:0004030;GO:0004030;GO:0005615;GO:0005737;GO:0005737;GO:0005783;GO:0005829;GO:0005829;GO:0005886;GO:0006081;GO:0006081;GO:0006081;GO:0008106;GO:0008106;GO:0008152;GO:0008284;GO:0014070;GO:0016021;GO:0016491;GO:0016491;GO:0016620;GO:0016620;GO:0018479;GO:0042493;GO:0051384;GO:0051591;GO:0055114;GO:0055114;GO:0055114;GO:0004028;GO:0004029;GO:…	-	aldehyde dehydrogenase family 3, subfamily A1[Source:MGI Symbol;Acc:MGI:1353451]
MGP_C57BL6NJ_G0017175	100.813	24.8643	176.762	7.10907	2.82966	0.00179876	0.110008	1	183652514	183689653	+	10831	Slamf6	GO:0001779;GO:0001779;GO:0001787;GO:0001787;GO:0002250;GO:0002376;GO:0005886;GO:0005886;GO:0005887;GO:0016020;GO:0016021;GO:0032729;GO:0032740;GO:0045087;GO:0045954;GO:0070062;GO:0072540;	K16852	SLAM family member 6 [Source:MGISymbol;Acc:MGI:1353620]
MGP_C57BL6NJ_G0036689	621.402	218.738	1024.07	4.68171	2.22704	0.00185226	0.112823	X	155901356	155912555	-	4870	Kctd12b	GO:0003674;GO:0008277;GO:0008277;GO:0043235;GO:0043235;GO:0051260;	K21918	potassium channel tetramerisation domain containing12b [Source:MGI Symbol;Acc:MGI:2444667]
MGP_C57BL6NJ_G0021142	36.8757	72.0464	1.70499	0.0236652	-5.40109	0.00193091	0.117142	13	76762394	76792622	-	4728	Nkd2	GO:0005509;GO:0005737;GO:0005737;GO:0005886;GO:0005886;GO:0006810;GO:0006887;GO:0010954;GO:0016020;GO:0016055;GO:0016323;GO:0016328;GO:0019838;GO:0030178;GO:0031410;GO:0031410;GO:0031625;GO:0032036;GO:0032436;GO:0046872;GO:0048210;GO:0051117;GO:0070382;GO:0071944;GO:0072659;GO:0090090;GO:1903078;	K03213	naked cuticle 2 homolog (Drosophila) [Source:MGISymbol;Acc:MGI:1919543]
MGP_C57BL6NJ_G0024881	8124.64	2940.38	13308.9	4.52625	2.17832	0.00194967	0.117807	18	62262211	62303090	+	1504	Cd74	GO:0000187;GO:0001516;GO:0001516;GO:0001540;GO:0001934;GO:0001961;GO:0001961;GO:0001961;GO:0002250;GO:0002376;GO:0002606;GO:0002606;GO:0002792;GO:0002821;GO:0002830;GO:0002830;GO:0002906;GO:0002906;GO:0004896;GO:0004896;GO:0004896;GO:0005515;GO:0005515;GO:0005764;GO:0005764;GO:0005770;GO:0005770;GO:0005771;GO:0005771;GO:0005773;GO:0005783;GO:0005783;GO:0005794;GO:0005794;GO:0005886;GO:0005886;GO:…	K06505	CD74 antigen (invariant polypeptide of majorhistocompatibility complex, class II antigen-associated)[Source:MGI Symbol;Acc:MGI:96534]
MGP_C57BL6NJ_G0019230	1037.25	374.39	1700.1	4.54099	2.18301	0.00197762	0.119019	11	86794627	86852053	-	3922	Slfn8	GO:0000049;GO:0000166;GO:0002376;GO:0003674;GO:0004518;GO:0004519;GO:0004521;GO:0004521;GO:0005524;GO:0005524;GO:0005622;GO:0005737;GO:0005737;GO:0008150;GO:0008270;GO:0008270;GO:0016075;GO:0016078;GO:0016787;GO:0046872;GO:0051607;GO:0090305;GO:0090502;GO:0004521;GO:0016075;GO:0016078;	-	schlafen 8 [Source:MGI Symbol;Acc:MGI:2672859]"
MGP_C57BL6NJ_G0023890	16.1889	0.911408	31.4664	34.525	5.10957	0.00202794	0.121092	17	32015730	32059431	+	3328	Ubash3a	GO:0001817;GO:0001817;GO:0005634;GO:0005654;GO:0005737;GO:0005794;GO:0005829;GO:0009968;GO:0016311;GO:0016791;GO:0050860;GO:0050860;GO:0050860;GO:0070062;	K18993	ubiquitin associated and SH3 domain containing, A[Source:MGI Symbol;Acc:MGI:1926074]
MGP_C57BL6NJ_G0026002	105.114	180.885	29.3436	0.162222	-2.62396	0.00202809	0.121092	2	30518208	30571609	+	4653	Ncs1	GO:0000287;GO:0005245;GO:0005245;GO:0005509;GO:0005509;GO:0005737;GO:0005737;GO:0005794;GO:0005829;GO:0005886;GO:0005886;GO:0010975;GO:0010975;GO:0014069;GO:0016020;GO:0019901;GO:0030054;GO:0030424;GO:0030424;GO:0030425;GO:0030425;GO:0031045;GO:0031410;GO:0034765;GO:0043231;GO:0044305;GO:0045202;GO:0045211;GO:0045921;GO:0046872;GO:0048015;GO:0048471;GO:0050806;GO:0070062;GO:0070588;GO:0098794;GO:…	K19932	neuronal calcium sensor 1 [Source:MGISymbol;Acc:MGI:109166]
MGP_C57BL6NJ_G0016603	195.054	365.785	24.3224	0.0664937	-3.91064	0.00205146	0.122005	1	85108619	85400364	+	12506	Nyap2	GO:0005622;GO:0014065;GO:0048812;	-	neuronal tyrosine-phophorylated phosphoinositide 3-kinase adaptor 2 [Source:MGI Symbol;Acc:MGI:2443135]
MGP_C57BL6NJ_G0028647	83.9138	146.229	21.5981	0.1477	-2.75926	0.00212736	0.125112	4	43697927	43726076	+	2320	Glipr2	GO:0000139;GO:0000139;GO:0005576;GO:0005615;GO:0005794;GO:0010634;GO:0010718;GO:0016020;GO:0042803;GO:0070062;GO:0070374;	-	GLI pathogenesis-related 2 [Source:MGISymbol;Acc:MGI:1917770]
MGP_C57BL6NJ_G0021314	19.48	1.51794	37.442	24.6663	4.62447	0.0021318	0.125112	13	116138329	116142878	-	2055	Gapt	GO:0001782;GO:0001782;GO:0001782;GO:0002322;GO:0002322;GO:0002322;GO:0002381;GO:0002381;GO:0002381;GO:0005886;GO:0016020;GO:0016021;GO:0016021;GO:0042113;	-	Grb2-binding adaptor, transmembrane [Source:MGISymbol;Acc:MGI:3608341]
MGP_C57BL6NJ_G0022505	16.0993	31.7724	0.426248	0.0134157	-6.21994	0.00213434	0.125112	15	83662557	83707828	+	4665	Mgat3	GO:0003830;GO:0006487;GO:0016020;GO:0016740;	K00737	mannoside acetylglucosaminyltransferase 3[Source:MGI Symbol;Acc:MGI:104532]
MGP_C57BL6NJ_G0022104	16739.2	6272.26	27206.1	4.33752	2.11687	0.00213683	0.125112	15	3710188	3810412	+	4890	Fyb	GO:0005102;GO:0005515;GO:0005515;GO:0005634;GO:0005737;GO:0005829;GO:0005886;GO:0005886;GO:0005886;GO:0006955;GO:0007165;GO:0008289;GO:0015629;GO:0030054;GO:0044877;GO:0072659;GO:0072659;	K17698	FYN binding protein [Source:MGISymbol;Acc:MGI:1346327]
MGP_C57BL6NJ_G0031324	6011.93	2270.99	9752.86	4.29453	2.1025	0.00216647	0.126071	6	75479124	75480623	-	1276	-	-	K13785	-
MGP_C57BL6NJ_G0024068	1755.82	611.92	2899.72	4.73872	2.2445	0.00216991	0.126071	17	37716072	37728079	-	2182	H2-T24	GO:0001916;GO:0002474;GO:0002476;GO:0005102;GO:0005886;GO:0006955;GO:0016020;GO:0016021;GO:0042605;	K06751	histocompatibility 2, T region locus 24 [Source:MGISymbol;Acc:MGI:95958]
MGP_C57BL6NJ_G0032193	17.2847	1.27654	33.2929	26.0805	4.7049	0.00219199	0.126693	7	17702861	17708632	+	1421	Pglyrp1	GO:0002221;GO:0002376;GO:0005125;GO:0005576;GO:0005615;GO:0005615;GO:0005737;GO:0006915;GO:0008270;GO:0008745;GO:0008745;GO:0009253;GO:0009617;GO:0009617;GO:0010469;GO:0016019;GO:0016019;GO:0016045;GO:0016045;GO:0019730;GO:0031640;GO:0031640;GO:0032689;GO:0032689;GO:0032689;GO:0032827;GO:0032827;GO:0032827;GO:0042742;GO:0042834;GO:0042834;GO:0042834;GO:0042834;GO:0044117;GO:0044117;GO:0045087;GO:…	K01446	peptidoglycan recognition protein 1 [Source:MGISymbol;Acc:MGI:1345092]
MGP_C57BL6NJ_G0018522	64.1416	112.73	15.5534	0.137971	-2.85757	0.00219738	0.126693	11	31412390	31425105	-	5433	Rhbdf1	GO:0000139;GO:0000139;GO:0004252;GO:0005783;GO:0005789;GO:0005789;GO:0005789;GO:0005794;GO:0006508;GO:0006508;GO:0008233;GO:0008283;GO:0008283;GO:0016020;GO:0016021;GO:0016021;GO:0016477;GO:0016477;GO:0016787;GO:0042058;GO:0042058;GO:0042058;GO:0050708;GO:0050708;GO:0050709;GO:0050709;GO:0061136;GO:0061136;	-	rhomboid 5 homolog 1 [Source:MGISymbol;Acc:MGI:104328]
MGP_C57BL6NJ_G0018603	36.8859	6.9239	66.8479	9.65465	3.27122	0.00222358	0.127667	11	49386568	49653760	+	4381	Olfr56	GO:0004871;GO:0004930;GO:0004930;GO:0004984;GO:0004984;GO:0004984;GO:0005886;GO:0007165;GO:0007186;GO:0007186;GO:0007186;GO:0007186;GO:0007608;GO:0007608;GO:0007608;GO:0016020;GO:0016021;GO:0016021;GO:0016021;GO:0016021;GO:0050896;GO:0050911;	-	olfactory receptor 56 [Source:MGISymbol;Acc:MGI:1333785]
MGP_C57BL6NJ_G0017822	55.2814	100.163	10.3996	0.103827	-3.26775	0.00223118	0.127667	10	81822050	81829464	-	3257	Syde1	GO:0007165;	K20655	synapse defective 1, Rho GTPase, homolog 1 (C.elegans) [Source:MGI Symbol;Acc:MGI:1918959]
MGP_C57BL6NJ_G0018866	16.6348	32.4009	0.868656	0.0268096	-5.22111	0.00230536	0.131414	11	67171397	67337311	-	5822	Arhgap44	GO:0005096;GO:0005096;GO:0005096;GO:0005543;GO:0005622;GO:0005737;GO:0005768;GO:0005887;GO:0007165;GO:0014069;GO:0014069;GO:0030054;GO:0031256;GO:0031256;GO:0031503;GO:0032956;GO:0032956;GO:0035021;GO:0035021;GO:0042995;GO:0043087;GO:0043197;GO:0043197;GO:0043197;GO:0043197;GO:0043547;GO:0045202;GO:0048365;GO:0048365;GO:0048786;GO:0048786;GO:0051649;GO:0051668;GO:0055037;GO:0061001;GO:0061001;GO:…	-	Rho GTPase activating protein 44 [Source:MGISymbol;Acc:MGI:2144423]
MGP_C57BL6NJ_G0024760	294.132	488.796	99.4671	0.203494	-2.29694	0.00242961	0.137976	18	37521091	37559702	+	5499	Pcdhgc3	GO:0016020;GO:0050808;	K16497	protocadherin gamma subfamily C, 3 [Source:MGISymbol;Acc:MGI:1935201]
MGP_C57BL6NJ_G0034305	136.542	231.973	41.1098	0.177218	-2.4964	0.00244078	0.138092	8	82740249	82922121	+	8968	Zfp827	GO:0003676;GO:0003677;GO:0005634;GO:0006351;GO:0006355;GO:0008150;GO:0010468;GO:0046872;	-	zinc finger protein 827 [Source:MGISymbol;Acc:MGI:2444807]
MGP_C57BL6NJ_G0034471	9.31137	0	18.6227	Inf	Inf	0.00246748	0.138146	8	99886271	99906478	+	3147	Adgrg5	GO:0004871;GO:0004888;GO:0004930;GO:0004930;GO:0004930;GO:0005622;GO:0005886;GO:0005887;GO:0007165;GO:0007166;GO:0007186;GO:0007186;GO:0007189;GO:0016020;GO:0016021;GO:0016021;	K08459	adhesion G protein-coupled receptor G5 [Source:MGISymbol;Acc:MGI:2685955]
MGP_C57BL6NJ_G0032693	24.4689	47.2005	1.73731	0.0368071	-4.76387	0.00246775	0.138146	7	47724487	47741895	+	4668	Tead2	GO:0001085;GO:0001134;GO:0001223;GO:0001570;GO:0001843;GO:0003143;GO:0003677;GO:0003677;GO:0003700;GO:0003700;GO:0003700;GO:0003700;GO:0003705;GO:0005515;GO:0005634;GO:0005634;GO:0005654;GO:0005667;GO:0005667;GO:0005829;GO:0006351;GO:0006355;GO:0006355;GO:0006461;GO:0030903;GO:0035329;GO:0035329;GO:0035329;GO:0043231;GO:0043565;GO:0044212;GO:0045893;GO:0045944;GO:0045944;GO:0046982;GO:0048339;GO:…	K09448	TEA domain family member 2 [Source:MGISymbol;Acc:MGI:104904]
MGP_C57BL6NJ_G0029333	18.2051	1.87799	34.5322	18.3879	4.20068	0.00246918	0.138146	4	141292463	141297621	+	1471	Zfp683	GO:0001779;GO:0001779;GO:0002250;GO:0002376;GO:0003676;GO:0003677;GO:0005575;GO:0005634;GO:0006351;GO:0006355;GO:0010468;GO:0010468;GO:0032823;GO:0032823;GO:0032826;GO:0032826;GO:0033082;GO:0033082;GO:0045087;GO:0046872;GO:0051136;GO:0051136;GO:1990841;GO:1990841;	-	zinc finger protein 683 [Source:MGISymbol;Acc:MGI:3650254]
MGP_C57BL6NJ_G0036730	14.3461	0.683556	28.0086	40.9748	5.35667	0.00252113	0.140532	X	166317096	166356453	-	2523	Grpr	GO:0004871;GO:0004930;GO:0004930;GO:0004930;GO:0004930;GO:0004946;GO:0005515;GO:0005886;GO:0005886;GO:0005887;GO:0005887;GO:0005887;GO:0005887;GO:0007165;GO:0007186;GO:0007186;GO:0007186;GO:0007186;GO:0007200;GO:0007200;GO:0007218;GO:0007611;GO:0008188;GO:0008188;GO:0008528;GO:0008528;GO:0008528;GO:0008528;GO:0016020;GO:0016020;GO:0016021;GO:0016021;GO:0031989;GO:0035176;GO:0035176;GO:0035176;GO:…	K04169	gastrin releasing peptide receptor [Source:MGISymbol;Acc:MGI:95836]
MGP_C57BL6NJ_G0023869	157.676	47.4455	267.906	5.64662	2.49739	0.00254656	0.141427	17	30034879	30055967	+	4134	Fgd2	GO:0001726;GO:0005085;GO:0005089;GO:0005089;GO:0005634;GO:0005634;GO:0005737;GO:0005737;GO:0005768;GO:0005769;GO:0005769;GO:0005856;GO:0005886;GO:0016020;GO:0031901;GO:0032587;GO:0035023;GO:0042995;GO:0043507;GO:0046872;GO:0046872;GO:0065009;GO:1901981;GO:0001726;GO:0005089;GO:0005634;GO:0005737;GO:0005769;GO:0043507;GO:1901981;	-	FYVE, RhoGEF and PH domain containing 2 [Source:MGISymbol;Acc:MGI:1347084]
MGP_C57BL6NJ_G0031295	21.2146	2.81698	39.6123	14.0619	3.81372	0.00261597	0.14475	6	73686459	73703065	+	1483	Cd8b1	GO:0002250;GO:0002376;GO:0005515;GO:0009897;GO:0009897;GO:0009986;GO:0009986;GO:0016020;GO:0016021;	K06459	CD8 antigen, beta chain 1 [Source:MGISymbol;Acc:MGI:88347]
MGP_C57BL6NJ_G0029061	27.8417	55.6834	0	0	-Inf	0.00265081	0.145647	4	122361222	122481669	+	5582	Zswim5	GO:0003674;GO:0005615;GO:0008150;GO:0008270;GO:0031462;GO:0046872;GO:1902667;	-	zinc finger SWIM-type containing 5 [Source:MGISymbol;Acc:MGI:1921714]
MGP_C57BL6NJ_G0030069	58.6028	13.2124	103.993	7.8709	2.97653	0.00265145	0.145647	5	78764456	78851376	+	8900	Kit	GO:0000166;GO:0000187;GO:0001541;GO:0001669;GO:0002020;GO:0002318;GO:0002320;GO:0002327;GO:0002371;GO:0002551;GO:0002573;GO:0004672;GO:0004713;GO:0004713;GO:0004713;GO:0004713;GO:0004714;GO:0004714;GO:0004714;GO:0004714;GO:0004716;GO:0004888;GO:0005020;GO:0005515;GO:0005515;GO:0005524;GO:0005524;GO:0005615;GO:0005737;GO:0005737;GO:0005737;GO:0005886;GO:0005886;GO:0005886;GO:0005887;GO:0005911;GO:…	K05091	kit oncogene [Source:MGI Symbol;Acc:MGI:96677]"
MGP_C57BL6NJ_G0021943	290.659	523.29	58.0267	0.110888	-3.17282	0.00266204	0.145698	14	68038101	68087367	-	3757	Bmp1	GO:0001503;GO:0004222;GO:0004222;GO:0004222;GO:0005125;GO:0005509;GO:0005515;GO:0005576;GO:0005578;GO:0005615;GO:0005615;GO:0005615;GO:0005615;GO:0005794;GO:0006508;GO:0006508;GO:0006508;GO:0007275;GO:0008083;GO:0008233;GO:0008233;GO:0008237;GO:0008237;GO:0008270;GO:0010469;GO:0016787;GO:0030154;GO:0031982;GO:0042802;GO:0046872;GO:0051216;GO:0061036;GO:0062023;	K05502	bone morphogenetic protein 1 [Source:MGISymbol;Acc:MGI:88176]
MGP_C57BL6NJ_G0032975	3357.28	1249.9	5464.66	4.37208	2.12832	0.0027085	0.147247	7	94205712	94238490	+	5801	Ctsc	GO:0001913;GO:0001913;GO:0004197;GO:0004252;GO:0004252;GO:0005615;GO:0005615;GO:0005654;GO:0005764;GO:0005764;GO:0005764;GO:0005783;GO:0005794;GO:0005813;GO:0006508;GO:0006508;GO:0006508;GO:0006508;GO:0006915;GO:0008233;GO:0008234;GO:0008234;GO:0008234;GO:0010033;GO:0016020;GO:0016505;GO:0016505;GO:0016787;GO:0019902;GO:0031404;GO:0042802;GO:0043231;GO:0043621;GO:0051087;GO:0051603;GO:0062023;GO:…	K01275	cathepsin C [Source:MGI Symbol;Acc:MGI:109553]"
MGP_C57BL6NJ_G0025754	19.7446	39.4892	0	0	-Inf	0.00270983	0.147247	2	7637611	7676611	-	3315	Itih2	GO:0004867;GO:0010951;GO:0030212;	K19015	inter-alpha trypsin inhibitor, heavy chain 2[Source:MGI Symbol;Acc:MGI:96619]
MGP_C57BL6NJ_G0031622	48.0567	87.0462	9.06722	0.104166	-3.26305	0.00275823	0.14934	6	124007284	124056702	-	6763	Ret	GO:0000165;GO:0000165;GO:0000166;GO:0000187;GO:0000187;GO:0001657;GO:0001657;GO:0001755;GO:0001755;GO:0001838;GO:0001838;GO:0004672;GO:0004713;GO:0004713;GO:0004713;GO:0004714;GO:0004714;GO:0004714;GO:0004714;GO:0004888;GO:0005509;GO:0005509;GO:0005515;GO:0005515;GO:0005515;GO:0005524;GO:0005524;GO:0005737;GO:0005768;GO:0005769;GO:0005829;GO:0005886;GO:0005886;GO:0005887;GO:0005887;GO:0006468;GO:…	K05126	ret proto-oncogene [Source:MGISymbol;Acc:MGI:97902]
MGP_C57BL6NJ_G0036387	232.912	80.4693	385.355	4.78885	2.25968	0.00280166	0.150664	X	84457134	84481355	+	3754	5430427O19Rik	GO:0003674;GO:0005575;GO:0008150;	-	RIKEN cDNA 5430427O19 gene [Source:MGISymbol;Acc:MGI:1918648]
MGP_C57BL6NJ_G0020121	1650.4	2773.78	527.011	0.189997	-2.39595	0.00280731	0.150664	12	53134999	53608819	+	10263	Akap6	GO:0001934;GO:0005515;GO:0005515;GO:0005634;GO:0005635;GO:0005737;GO:0005901;GO:0007194;GO:0008179;GO:0008179;GO:0010738;GO:0014701;GO:0014704;GO:0016529;GO:0016529;GO:0019899;GO:0030307;GO:0030315;GO:0031965;GO:0031965;GO:0032516;GO:0032947;GO:0032991;GO:0034237;GO:0034629;GO:0034704;GO:0035556;GO:0042383;GO:0043495;GO:0044325;GO:0044325;GO:0048471;GO:0048471;GO:0048471;GO:0048471;GO:0051018;GO:…	K16523	A kinase (PRKA) anchor protein 6 [Source:MGISymbol;Acc:MGI:3050566]
MGP_C57BL6NJ_G0027661	11.1081	0.227852	21.9884	96.5032	6.5925	0.00281262	0.150664	3	60112223	60117596	-	2225	Gpr171	GO:0004871;GO:0004930;GO:0004930;GO:0005886;GO:0005887;GO:0007165;GO:0007186;GO:0007186;GO:0007186;GO:0016020;GO:0016021;GO:0016021;GO:0035589;GO:0045028;GO:0045638;GO:0045638;	K08441	G protein-coupled receptor 171 [Source:MGISymbol;Acc:MGI:2442043]
MGP_C57BL6NJ_G0029319	11.3312	22.6624	0	0	-Inf	0.00282418	0.150749	4	140624982	140632904	-	1654	Trnp1	GO:0003677;GO:0003677;GO:0005515;GO:0005634;GO:0005634;GO:0005634;GO:0005719;GO:0005719;GO:0006351;GO:0006355;GO:0007049;GO:0007275;GO:0007399;GO:0021696;GO:0021696;GO:0042127;GO:0042127;GO:0051726;GO:0051726;GO:0061351;GO:0061351;	-	TMF1-regulated nuclear protein 1 [Source:MGISymbol;Acc:MGI:1916789]
MGP_C57BL6NJ_G0026296	72.5378	19.8764	125.199	6.29889	2.6551	0.00286621	0.152003	2	82238858	82377873	-	5283	Cerkl	GO:0001750;GO:0001917;GO:0003951;GO:0005634;GO:0005730;GO:0005737;GO:0005783;GO:0005794;GO:0005829;GO:0008152;GO:0016301;GO:0016301;GO:0016310;GO:0030148;GO:0043066;GO:0046625;GO:0046834;GO:0048471;GO:0001750;GO:0001917;GO:0005634;GO:0005737;GO:0030148;GO:0046625;GO:0048471;	-	ceramide kinase-like [Source:MGISymbol;Acc:MGI:3037816]
MGP_C57BL6NJ_G0028862	42.1483	75.61	8.68656	0.114886	-3.12172	0.00286778	0.152003	4	92632692	92637435	-	1393	Cdkn2b	GO:0000079;GO:0000086;GO:0004861;GO:0004861;GO:0005634;GO:0005634;GO:0005737;GO:0007049;GO:0007050;GO:0007093;GO:0008285;GO:0016301;GO:0016310;GO:0019901;GO:0030511;GO:0031668;GO:0031670;GO:0042326;GO:0045736;GO:0048536;GO:0048536;GO:0050680;GO:0060253;GO:0071901;GO:1902807;GO:2000134;GO:2000134;	K04685	cyclin-dependent kinase inhibitor 2B (p15, inhibitsCDK4) [Source:MGI Symbol;Acc:MGI:104737]
MGP_C57BL6NJ_G0027896	1146.13	1864.5	427.753	0.229419	-2.12394	0.00290111	0.152826	3	94349446	94363626	+	1367	S100a6	GO:0001726;GO:0005509;GO:0005509;GO:0005509;GO:0005509;GO:0005515;GO:0005515;GO:0005523;GO:0005576;GO:0005634;GO:0005634;GO:0005635;GO:0005635;GO:0005737;GO:0005737;GO:0005829;GO:0005829;GO:0005886;GO:0005886;GO:0008270;GO:0008270;GO:0015075;GO:0016020;GO:0031234;GO:0031234;GO:0034220;GO:0042803;GO:0044548;GO:0046872;GO:0048306;GO:0048471;GO:0062023;GO:0070062;	-	S100 calcium binding protein A6 (calcyclin)[Source:MGI Symbol;Acc:MGI:1339467]
MGP_C57BL6NJ_G0019993	3417.05	1317.12	5516.99	4.18869	2.0665	0.00290752	0.152826	12	9816561	9935069	+	4846	Fam49a	GO:0003674;GO:0005622;GO:0008150;	-	family with sequence similarity 49, member A[Source:MGI Symbol;Acc:MGI:1261783]
MGP_C57BL6NJ_G0026774	10.8204	21.6408	0	0	-Inf	0.00291367	0.152826	2	126622780	126643149	+	6198	Tyro3	GO:0000166;GO:0001779;GO:0004672;GO:0004713;GO:0004713;GO:0004713;GO:0004714;GO:0004888;GO:0005524;GO:0005524;GO:0005634;GO:0005634;GO:0005635;GO:0005635;GO:0005737;GO:0005789;GO:0005789;GO:0005886;GO:0005887;GO:0006468;GO:0006468;GO:0007155;GO:0007218;GO:0007283;GO:0007283;GO:0009968;GO:0009986;GO:0016020;GO:0016021;GO:0016055;GO:0016301;GO:0016310;GO:0016740;GO:0017147;GO:0018108;GO:0021885;GO:…	K05116	TYRO3 protein tyrosine kinase 3 [Source:MGISymbol;Acc:MGI:104294]
MGP_C57BL6NJ_G0016896	29.5364	4.80418	54.2685	11.2961	3.49776	0.00294119	0.153736	1	142312664	142323681	-	2309	Lax1	GO:0000188;GO:0002250;GO:0002376;GO:0005794;GO:0005829;GO:0005886;GO:0005886;GO:0006955;GO:0006955;GO:0016020;GO:0016020;GO:0016021;GO:0016021;GO:0019901;GO:0035556;GO:0042113;GO:0042169;GO:0046649;GO:0046649;GO:0048305;GO:0048305;GO:0050851;GO:0050851;GO:0050868;GO:0051249;	-	lymphocyte transmembrane adaptor 1 [Source:MGISymbol;Acc:MGI:2443362]
MGP_C57BL6NJ_G0033078	10.7585	21.5171	0	0	-Inf	0.00296981	0.154495	7	108882825	108916885	-	1210	Lrrc51	GO:0003674;GO:0005575;GO:0005737;GO:0008150;	-	leucine rich repeat containing 51 [Source:MGISymbol;Acc:MGI:1916608]
MGP_C57BL6NJ_G0031752	13.6652	27.3303	0	0	-Inf	0.00297616	0.154495	6	134866603	134937356	+	5326	Tspan11	GO:0003674;GO:0005887;GO:0007166;GO:0016020;GO:0016021;GO:0016021;	K17352	tetraspanin 11 [Source:MGI Symbol;Acc:MGI:1915748]"
MGP_C57BL6NJ_G0025561	22.9203	45.4062	0.434328	0.00956538	-6.70796	0.00299911	0.155153	19	43006192	43031644	-	4213	Loxl4	GO:0004720;GO:0004720;GO:0005044;GO:0005507;GO:0005576;GO:0005576;GO:0005615;GO:0005615;GO:0006898;GO:0016020;GO:0016491;GO:0016641;GO:0018057;GO:0030199;GO:0043235;GO:0046872;GO:0055114;GO:0055114;GO:0070062;	K00280	lysyl oxidase-like 4 [Source:MGISymbol;Acc:MGI:1914823]
MGP_C57BL6NJ_G0023903	21.2544	40.3453	2.16356	0.0536261	-4.22092	0.00301389	0.155385	17	33036321	33085257	-	8044	Notch3	GO:0000122;GO:0000122;GO:0004872;GO:0005509;GO:0005515;GO:0005515;GO:0005515;GO:0005515;GO:0005634;GO:0005654;GO:0005654;GO:0005829;GO:0005829;GO:0005886;GO:0005886;GO:0005886;GO:0005886;GO:0005887;GO:0006351;GO:0006355;GO:0006355;GO:0006355;GO:0007219;GO:0007219;GO:0007219;GO:0007219;GO:0007275;GO:0007275;GO:0015629;GO:0016020;GO:0016021;GO:0016021;GO:0019899;GO:0019899;GO:0030154;GO:0030154;GO:…	K20995	notch 3 [Source:MGI Symbol;Acc:MGI:99460]"
MGP_C57BL6NJ_G0019207	1692.98	3262.52	123.437	0.0378349	-4.72414	0.00304634	0.156524	11	84140647	84461157	-	6465	Myo1d	GO:0000146;GO:0000166;GO:0003774;GO:0003777;GO:0003779;GO:0005515;GO:0005516;GO:0005516;GO:0005524;GO:0005524;GO:0005768;GO:0005790;GO:0005829;GO:0005903;GO:0005903;GO:0005903;GO:0007018;GO:0008017;GO:0010923;GO:0010923;GO:0016323;GO:0016323;GO:0016459;GO:0016459;GO:0016459;GO:0019904;GO:0030424;GO:0030424;GO:0030673;GO:0030898;GO:0030898;GO:0031410;GO:0031410;GO:0043005;GO:0043005;GO:0043025;GO:…	K10356	myosin ID [Source:MGI Symbol;Acc:MGI:107728]"
MGP_C57BL6NJ_G0035591	362.292	597.707	126.877	0.212274	-2.236	0.00309628	0.15855	9	89768088	89904185	-	3823	Me1	GO:0004470;GO:0004470;GO:0004470;GO:0004470;GO:0004471;GO:0004473;GO:0004473;GO:0004473;GO:0004473;GO:0005515;GO:0005737;GO:0005739;GO:0005739;GO:0005739;GO:0005829;GO:0005829;GO:0006090;GO:0006108;GO:0006108;GO:0006108;GO:0008948;GO:0009725;GO:0009725;GO:0016491;GO:0030145;GO:0030145;GO:0046872;GO:0050661;GO:0051262;GO:0051262;GO:0051287;GO:0055114;GO:0055114;GO:1902031;	K00029	malic enzyme 1, NADP(+)-dependent, cytosolic[Source:MGI Symbol;Acc:MGI:97043]
MGP_C57BL6NJ_G0034570	10.7506	21.5011	0	0	-Inf	0.0031253	0.159496	8	112453367	112460022	-	4340	Esrp2	GO:0000380;GO:0000380;GO:0003676;GO:0003723;GO:0003723;GO:0003729;GO:0003729;GO:0005634;GO:0005634;GO:0005654;GO:0006397;GO:0008380;GO:0043484;GO:0043484;GO:0043484;GO:0050679;GO:0050679;GO:0060441;GO:0060441;GO:0060445;GO:0060445;	K14947	epithelial splicing regulatory protein 2[Source:MGI Symbol;Acc:MGI:1924661]
MGP_C57BL6NJ_G0035401	22.8058	43.0057	2.60597	0.0605959	-4.04464	0.00316722	0.161091	9	60982824	61579917	-	13986	Thsd4	GO:0001527;GO:0005515;GO:0005576;GO:0005578;GO:0005578;GO:0006508;GO:0008233;GO:0016787;GO:0031012;GO:0048251;GO:0070062;GO:0001527;GO:0005578;GO:0031012;GO:0048251;	-	thrombospondin, type I, domain containing 4[Source:MGI Symbol;Acc:MGI:2672033]
MGP_C57BL6NJ_G0023671	53.9677	102.723	5.21193	0.0507376	-4.3008	0.00320114	0.162037	17	23572320	23574322	-	963	Tnfrsf12a	GO:0001525;GO:0001726;GO:0001726;GO:0005515;GO:0005886;GO:0005886;GO:0006915;GO:0006931;GO:0006931;GO:0007155;GO:0007155;GO:0007155;GO:0007275;GO:0009986;GO:0009986;GO:0016020;GO:0016021;GO:0030154;GO:0043065;GO:0045765;GO:0045765;GO:0045773;GO:0045773;GO:0061041;GO:0097191;GO:0097191;GO:2001238;	K05149	tumor necrosis factor receptor superfamily, member12a [Source:MGI Symbol;Acc:MGI:1351484]
MGP_C57BL6NJ_G0025296	3891.96	1488.23	6295.68	4.2303	2.08076	0.00320726	0.162037	19	9270150	9288338	+	1527	Ms4a6c	GO:0016020;GO:0016021;GO:0016021;	K22191	membrane-spanning 4-domains, subfamily A, member 6C[Source:MGI Symbol;Acc:MGI:2385644]
MGP_C57BL6NJ_G0030969	25.5644	47.6821	3.44682	0.0722875	-3.79011	0.00323937	0.163113	6	28536768	28585646	+	8329	Strip2	GO:0003674;GO:0005737;GO:0005737;GO:0005829;GO:0007010;GO:0007010;GO:0008360;GO:0008360;GO:0016477;GO:0016477;	-	striatin interacting protein 2 [Source:MGISymbol;Acc:MGI:2444363]
MGP_C57BL6NJ_G0030960	332.949	631.261	34.6379	0.054871	-4.18781	0.00326293	0.163753	6	28012211	28040705	+	9399	Flnc	GO:0048747;	K04437	filamin C, gamma [Source:MGI Symbol;Acc:MGI:95557]"
MGP_C57BL6NJ_G0028032	369.431	132.474	606.388	4.5774	2.19453	0.00331937	0.165566	3	100640128	100642821	+	332	Hist2h3b	GO:0000122;GO:0000122;GO:0000183;GO:0000228;GO:0000784;GO:0000785;GO:0000785;GO:0000786;GO:0000786;GO:0000786;GO:0000786;GO:0000788;GO:0003677;GO:0003677;GO:0003682;GO:0003682;GO:0005515;GO:0005634;GO:0005634;GO:0005634;GO:0005634;GO:0005654;GO:0005694;GO:0006334;GO:0006334;GO:0006335;GO:0016020;GO:0031492;GO:0032991;GO:0042393;GO:0043234;GO:0045296;GO:0046982;GO:0051290;GO:0060968;GO:0060968;GO:…	-	histone cluster 2, H3b [Source:MGISymbol;Acc:MGI:2448351]
MGP_C57BL6NJ_G0026191	260.745	90.6761	430.814	4.75113	2.24827	0.00332096	0.165566	2	64199337	64230376	+	3399	Gca	GO:0004198;GO:0005509;GO:0005509;GO:0005509;GO:0005737;GO:0005829;GO:0005886;GO:0006508;GO:0016020;GO:0042803;GO:0046872;GO:0046982;GO:0070062;	-	grancalcin [Source:MGI Symbol;Acc:MGI:1918521]"
MGP_C57BL6NJ_G0021823	812.278	293.587	1330.97	4.53347	2.18061	0.00337619	0.167766	14	56105675	56330160	-	2985	Phf11d	-	-	PHD finger protein 11D [Source:MGISymbol;Acc:MGI:1277133]
MGP_C57BL6NJ_G0031991	28.7434	4.54061	52.9462	11.6606	3.54357	0.0034102	0.1689	7	1470755	1477017	-	1928	Tnni3	GO:0001570;GO:0001980;GO:0006874;GO:0006937;GO:0006941;GO:0007507;GO:0030017;	K12044	troponin I, cardiac 3 [Source:MGISymbol;Acc:MGI:98783]
MGP_C57BL6NJ_G0030047	57.6654	14.3194	101.011	7.05414	2.81847	0.00342157	0.168909	5	75629756	75690818	-	10981	Txk	GO:0000166;GO:0000978;GO:0001012;GO:0001077;GO:0001816;GO:0001865;GO:0002250;GO:0002250;GO:0002376;GO:0003677;GO:0004672;GO:0004713;GO:0004713;GO:0004715;GO:0004715;GO:0005524;GO:0005524;GO:0005634;GO:0005634;GO:0005737;GO:0005737;GO:0005886;GO:0006351;GO:0006355;GO:0006357;GO:0006366;GO:0006468;GO:0006468;GO:0007169;GO:0007202;GO:0007229;GO:0010543;GO:0016020;GO:0016301;GO:0016310;GO:0016740;GO:…	-	TXK tyrosine kinase [Source:MGISymbol;Acc:MGI:102960]
MGP_C57BL6NJ_G0018015	38.4658	7.03819	69.8934	9.93059	3.31188	0.00345153	0.169696	10	90797939	90984877	-	8757	Stab2	GO:0005041;GO:0005041;GO:0005044;GO:0005509;GO:0005540;GO:0005540;GO:0005540;GO:0005737;GO:0005829;GO:0005886;GO:0005887;GO:0006897;GO:0006897;GO:0006898;GO:0007155;GO:0009897;GO:0009897;GO:0010468;GO:0016020;GO:0016021;GO:0030169;GO:0030169;GO:0030193;GO:0042742;GO:0050830;GO:0050830;	K19013	stabilin 2 [Source:MGI Symbol;Acc:MGI:2178743]"
MGP_C57BL6NJ_G0019138	353.702	622.519	84.8844	0.136356	-2.87455	0.00345997	0.169696	11	80832201	80853880	-	3839	Ankrd13b	GO:0003674;GO:0005737;GO:0005768;GO:0005769;GO:0005770;GO:0005886;GO:0008150;GO:0016020;GO:0043231;	-	ankyrin repeat domain 13b [Source:MGISymbol;Acc:MGI:2144501]
MGP_C57BL6NJ_G0023188	7462.78	2893.84	12031.7	4.1577	2.05579	0.00350238	0.17122	16	34911026	34952635	-	9306	Parp14	GO:0002376;GO:0003723;GO:0003950;GO:0003950;GO:0003950;GO:0005515;GO:0005515;GO:0005634;GO:0005737;GO:0005737;GO:0005737;GO:0005829;GO:0006351;GO:0006355;GO:0006471;GO:0010629;GO:0016020;GO:0016740;GO:0016757;GO:0019899;GO:0042531;GO:0042532;GO:0045087;GO:0060336;GO:0060336;GO:0060336;GO:0070212;GO:0070403;GO:1902216;GO:1902216;GO:1902216;	K15261	poly (ADP-ribose) polymerase family, member 14[Source:MGI Symbol;Acc:MGI:1919489]
MGP_C57BL6NJ_G0016897	388.754	637.915	139.593	0.218827	-2.19214	0.00352027	0.171539	1	142332704	142445684	-	12213	Atp2b4	GO:0000166;GO:0000166;GO:0005388;GO:0005388;GO:0005388;GO:0005388;GO:0005516;GO:0005516;GO:0005524;GO:0005524;GO:0005886;GO:0005886;GO:0005887;GO:0005887;GO:0005929;GO:0006357;GO:0006810;GO:0006811;GO:0006816;GO:0006816;GO:0006874;GO:0006874;GO:0006874;GO:0006874;GO:0010751;GO:0016020;GO:0016020;GO:0016020;GO:0016021;GO:0016021;GO:0016323;GO:0016787;GO:0017080;GO:0019901;GO:0030018;GO:0030165;GO:…	K05850	ATPase, Ca++ transporting, plasma membrane 4[Source:MGI Symbol;Acc:MGI:88111]
MGP_C57BL6NJ_G0027780	4100.36	1492.99	6707.74	4.49283	2.16762	0.0036368	0.176566	3	90684669	90697860	+	2036	Cd5l	GO:0002376;GO:0005044;GO:0005576;GO:0005737;GO:0006898;GO:0006915;GO:0006954;GO:0016020;GO:0070062;GO:0072562;	-	CD5 antigen-like [Source:MGISymbol;Acc:MGI:1334419]
MGP_C57BL6NJ_G0027105	34.2939	67.2848	1.30298	0.0193652	-5.69039	0.00365866	0.176566	2	162108809	162110119	-	1311	Foxs1	GO:0000122;GO:0000122;GO:0000978;GO:0000978;GO:0000981;GO:0001078;GO:0001078;GO:0001568;GO:0001568;GO:0001568;GO:0003677;GO:0003677;GO:0003700;GO:0005634;GO:0005634;GO:0005634;GO:0005634;GO:0006351;GO:0006355;GO:0006355;GO:0006357;GO:0009653;GO:0030154;GO:0040018;GO:0040018;GO:0043433;GO:0043433;GO:0043565;GO:0045892;GO:0045892;GO:0050885;GO:0050885;	K09412	forkhead box S1 [Source:MGI Symbol;Acc:MGI:95546]"
MGP_C57BL6NJ_G0026328	1689.87	620.73	2759.01	4.44478	2.15211	0.00366489	0.176566	2	88141535	88157763	+	1471	-	-	-	-
MGP_C57BL6NJ_G0036351	196.017	71.2189	320.815	4.50463	2.17141	0.00367489	0.176566	X	73070829	73202412	-	3889	Gab3	GO:0005515;GO:0005575;GO:0030225;GO:0030225;	-	growth factor receptor bound protein 2-associatedprotein 3 [Source:MGI Symbol;Acc:MGI:2387324]
MGP_C57BL6NJ_G0036658	20.4302	39.9916	0.868656	0.0217209	-5.52477	0.00368187	0.176566	X	149181814	149267953	-	6608	Lrch2	GO:0003674;GO:0005886;GO:0007165;	-	leucine-rich repeats and calponin homology (CH)domain containing 2 [Source:MGI Symbol;Acc:MGI:2147870]
MGP_C57BL6NJ_G0032976	220.659	426.222	15.0954	0.0354169	-4.81942	0.00370575	0.17692	7	94341182	94403204	+	1471	Rab38	GO:0000166;GO:0003924;GO:0003924;GO:0005515;GO:0005525;GO:0005525;GO:0005525;GO:0005737;GO:0005739;GO:0005764;GO:0005769;GO:0005783;GO:0005794;GO:0005794;GO:0005802;GO:0005802;GO:0005829;GO:0005886;GO:0006810;GO:0006886;GO:0006996;GO:0007005;GO:0015031;GO:0016020;GO:0016020;GO:0016192;GO:0030670;GO:0030742;GO:0031410;GO:0031982;GO:0031982;GO:0032482;GO:0033162;GO:0033162;GO:0035646;GO:0035650;GO:…	K07923	RAB38, member RAS oncogene family [Source:MGISymbol;Acc:MGI:1919683]
MGP_C57BL6NJ_G0020646	32.7042	62.4246	2.98373	0.0477974	-4.38693	0.00371268	0.17692	13	17420712	17449053	-	2386	Epdr1	GO:0003674;GO:0005509;GO:0005576;GO:0005576;GO:0005615;GO:0005615;GO:0005764;GO:0005764;GO:0007160;GO:0008150;GO:0070062;	-	ependymin related protein 1 (zebrafish) [Source:MGISymbol;Acc:MGI:2145369]
MGP_C57BL6NJ_G0018029	565.024	219.302	910.746	4.15293	2.05413	0.00374756	0.177631	10	92794097	92805823	-	3341	Spic	GO:0000978;GO:0000981;GO:0001077;GO:0001824;GO:0003677;GO:0003700;GO:0005634;GO:0005634;GO:0006351;GO:0006355;GO:0006355;GO:0006357;GO:0006366;GO:0030154;GO:0043565;GO:0045944;GO:0045944;GO:0000978;GO:0001077;GO:0001824;GO:0045944;	-	Spi-C transcription factor (Spi-1/PU.1 related)[Source:MGI Symbol;Acc:MGI:1341168]
MGP_C57BL6NJ_G0020808	10.2527	20.5055	0	0	-Inf	0.00375111	0.177631	13	30558744	30564333	+	2365	Foxf2	GO:0000977;GO:0001228;GO:0003677;GO:0003677;GO:0003677;GO:0003700;GO:0003700;GO:0003700;GO:0003705;GO:0005634;GO:0005634;GO:0005634;GO:0005667;GO:0006351;GO:0006355;GO:0006355;GO:0006366;GO:0008134;GO:0030154;GO:0030198;GO:0030198;GO:0042249;GO:0042249;GO:0043565;GO:0043565;GO:0045892;GO:0045892;GO:0045893;GO:0045944;GO:0048566;GO:0048566;GO:0048596;GO:0048596;GO:0048806;GO:0060021;	K09399	forkhead box F2 [Source:MGISymbol;Acc:MGI:1347479]
MGP_C57BL6NJ_G0022230	34.3767	67.0484	1.70499	0.0254293	-5.29737	0.00378436	0.178498	15	43207819	43365253	-	2816	Rspo2	GO:0001649;GO:0001649;GO:0005102;GO:0005109;GO:0005576;GO:0005576;GO:0005576;GO:0005615;GO:0008201;GO:0008201;GO:0008201;GO:0009986;GO:0009986;GO:0016055;GO:0030282;GO:0030282;GO:0035115;GO:0035115;GO:0035116;GO:0035116;GO:0042489;GO:0042489;GO:0050896;GO:0060437;GO:0060437;GO:0060441;GO:0060441;GO:0060535;GO:0060535;GO:0071542;GO:0071542;GO:0090263;GO:0090263;GO:0090263;	K23097	R-spondin 2 [Source:MGI Symbol;Acc:MGI:1922667]"
MGP_C57BL6NJ_G0019378	10.4146	20.8293	0	0	-Inf	0.00379305	0.178498	11	100842743	100861943	-	3733	Ngfr	GO:0005622;GO:0007165;GO:0016020;GO:0016021;	K02583	nerve growth factor receptor (TNFR superfamily,member 16) [Source:MGI Symbol;Acc:MGI:97323]
MGP_C57BL6NJ_G0017618	16.4136	31.9605	0.866715	0.0271183	-5.20459	0.00381075	0.178774	10	53007945	53107039	+	7282	Dcbld1	GO:0004252;GO:0005615;GO:0008150;GO:0016020;GO:0016021;GO:0031638;GO:0070492;	-	discoidin, CUB and LCCL domain containing 1[Source:MGI Symbol;Acc:MGI:1913936]
MGP_C57BL6NJ_G0018445	459.724	843.68	75.7685	0.0898071	-3.47703	0.00382719	0.178989	11	14736166	14912795	+	11315	Egfr	GO:0000139;GO:0000166;GO:0000186;GO:0000902;GO:0001892;GO:0001934;GO:0001934;GO:0001942;GO:0003682;GO:0003682;GO:0004672;GO:0004713;GO:0004713;GO:0004713;GO:0004713;GO:0004714;GO:0004714;GO:0004714;GO:0004716;GO:0004871;GO:0004888;GO:0004888;GO:0005006;GO:0005006;GO:0005102;GO:0005178;GO:0005515;GO:0005515;GO:0005515;GO:0005516;GO:0005524;GO:0005524;GO:0005622;GO:0005634;GO:0005634;GO:0005634;GO:…	-	epidermal growth factor receptor [Source:MGISymbol;Acc:MGI:95294]
MGP_C57BL6NJ_G0020647	11.1738	22.3475	0	0	-Inf	0.00391707	0.182627	13	17453414	17463061	+	1756	Sfrp4	GO:0002092;GO:0004930;GO:0005576;GO:0005615;GO:0005615;GO:0005634;GO:0005737;GO:0005737;GO:0007186;GO:0007275;GO:0008285;GO:0009986;GO:0010628;GO:0016021;GO:0016055;GO:0017147;GO:0017147;GO:0030154;GO:0030510;GO:0030510;GO:0035567;GO:0042813;GO:0043065;GO:0043433;GO:0045606;GO:0046329;GO:0055062;GO:0060070;GO:0060349;GO:0060349;GO:0060349;GO:0090090;GO:0090090;GO:0090090;GO:0090090;GO:0090263;GO:…	K02185	secreted frizzled-related protein 4 [Source:MGISymbol;Acc:MGI:892010]
MGP_C57BL6NJ_G0025770	14.9775	29.0863	0.868656	0.0298648	-5.06541	0.00394628	0.183385	2	11047309	11291415	-	14935	Cubn	GO:0001701;GO:0004872;GO:0005509;GO:0005515;GO:0005737;GO:0005737;GO:0005764;GO:0005765;GO:0005768;GO:0005768;GO:0005768;GO:0005783;GO:0005783;GO:0005794;GO:0005794;GO:0005798;GO:0005886;GO:0005886;GO:0005903;GO:0005903;GO:0005905;GO:0005905;GO:0005905;GO:0006629;GO:0006810;GO:0006898;GO:0006898;GO:0007165;GO:0007584;GO:0008144;GO:0008144;GO:0008202;GO:0008203;GO:0009617;GO:0009617;GO:0015031;GO:…	K14616	cubilin (intrinsic factor-cobalamin receptor)[Source:MGI Symbol;Acc:MGI:1931256]
MGP_C57BL6NJ_G0024548	487.189	793.695	180.682	0.227646	-2.13514	0.0039576	0.183385	18	7030978	7209409	+	3222	Colec12	GO:0004888;GO:0005581;GO:0006910;GO:0006910;GO:0006955;GO:0006955;GO:0008329;GO:0008329;GO:0016020;GO:0016021;GO:0016021;GO:0030169;GO:0030169;GO:0030246;GO:0030246;GO:0034138;GO:0046872;GO:0060355;GO:0062023;GO:0070062;	K10062	collectin sub-family member 12 [Source:MGISymbol;Acc:MGI:2152907]
MGP_C57BL6NJ_G0017101	14.4052	0.867395	27.943	32.2148	5.00965	0.00401499	0.185475	1	177041933	177139096	+	5329	Cd247	GO:0002250;GO:0002376;GO:0004888;GO:0005515;GO:0005515;GO:0005737;GO:0005886;GO:0007166;GO:0007166;GO:0016020;GO:0016020;GO:0016021;GO:0032623;GO:0032623;GO:0042101;GO:0042101;GO:0042105;GO:0042105;GO:0042802;GO:0042803;GO:0050852;GO:0050852;GO:0050852;GO:0051289;GO:0070207;GO:1990782;GO:2000010;GO:2000010;	-	CD247 antigen [Source:MGI Symbol;Acc:MGI:88334]"
MGP_C57BL6NJ_G0029386	15.1813	29.9283	0.434328	0.0145123	-6.10658	0.00412822	0.189882	4	143656493	143706169	+	4225	Asap3	GO:0001726;GO:0001726;GO:0001726;GO:0005096;GO:0005096;GO:0005096;GO:0005654;GO:0005737;GO:0005829;GO:0005925;GO:0005925;GO:0005925;GO:0005925;GO:0016477;GO:0016477;GO:0016477;GO:0043231;GO:0043231;GO:0043547;GO:0043547;GO:0043547;GO:0046872;GO:0051492;GO:0051492;GO:0051492;	K12488	ArfGAP with SH3 domain, ankyrin repeat and PHdomain 3 [Source:MGI Symbol;Acc:MGI:2684986]
MGP_C57BL6NJ_G0018787	12.6294	24.8245	0.434328	0.0174959	-5.83684	0.00413552	0.189882	11	61005646	61034393	+	3329	Wnt9a	GO:0005102;GO:0005109;GO:0005515;GO:0005576;GO:0005576;GO:0005576;GO:0005578;GO:0005615;GO:0007093;GO:0007275;GO:0007275;GO:0008285;GO:0010469;GO:0016055;GO:0016055;GO:0016055;GO:0030182;GO:0032331;GO:0032331;GO:0035115;GO:0035115;GO:0043154;GO:0043154;GO:0045165;GO:0045597;GO:0045597;GO:0045880;GO:0045880;GO:0048018;GO:0048704;GO:0048704;GO:0048856;GO:0048856;GO:0060070;GO:0060070;GO:0060548;GO:…	K01064	wingless-type MMTV integration site family, member9A [Source:MGI Symbol;Acc:MGI:2446084]
MGP_C57BL6NJ_G0034159	207.479	340.742	74.2169	0.21781	-2.19886	0.00415537	0.190029	8	71791788	71848115	-	5401	Slc18a1	GO:0005335;GO:0005737;GO:0005887;GO:0006810;GO:0006836;GO:0006836;GO:0006837;GO:0006855;GO:0008504;GO:0015222;GO:0015222;GO:0015238;GO:0015842;GO:0015893;GO:0016020;GO:0016021;GO:0016021;GO:0019899;GO:0030054;GO:0030659;GO:0030672;GO:0030672;GO:0031410;GO:0033603;GO:0043195;GO:0045202;GO:0051610;GO:0051612;GO:0055085;	K08155	solute carrier family 18 (vesicular monoamine),member 1 [Source:MGI Symbol;Acc:MGI:106684]
MGP_C57BL6NJ_G0026921	10.1702	20.3404	0	0	-Inf	0.00417116	0.190029	2	137989989	137996833	-	2432	Cpxm1	GO:0004181;GO:0005576;GO:0005615;GO:0005615;GO:0005615;GO:0005615;GO:0006518;GO:0008270;GO:0016485;GO:0016787;GO:0046872;	K08638	carboxypeptidase X 1 (M14 family) [Source:MGISymbol;Acc:MGI:1934569]
MGP_C57BL6NJ_G0027232	16.6592	32.0235	1.2949	0.0404361	-4.62821	0.00417647	0.190029	2	170996277	171021391	+	3694	Lpin3	GO:0003713;GO:0005634;GO:0005634;GO:0005634;GO:0006629;GO:0006631;GO:0008195;GO:0008195;GO:0008195;GO:0009062;GO:0016311;GO:0016787;GO:0019432;GO:0045944;GO:0008195;	K15728	lipin 3 [Source:MGI Symbol;Acc:MGI:1891342]"
MGP_C57BL6NJ_G0018114	187.141	68.7427	305.54	4.4447	2.15208	0.00421901	0.190934	10	117024185	117072178	+	9009	E2f7	GO:0000122;GO:0000977;GO:0000978;GO:0001047;GO:0001227;GO:0001890;GO:0002040;GO:0003700;GO:0003714;GO:0005634;GO:0006355;GO:0008285;GO:0032466;GO:0032877;GO:0060707;GO:0060718;GO:0070365;GO:2000134;	-	E2F transcription factor 7 [Source:MGISymbol;Acc:MGI:1289147]
MGP_C57BL6NJ_G0034432	387.315	732.569	42.0616	0.0574165	-4.12239	0.00422582	0.190934	8	97609424	97637355	+	3038	Mmp2	GO:0001525;GO:0001541;GO:0001666;GO:0001666;GO:0001955;GO:0001955;GO:0001957;GO:0001957;GO:0001968;GO:0004222;GO:0004222;GO:0004222;GO:0004252;GO:0005576;GO:0005578;GO:0005615;GO:0005615;GO:0005615;GO:0005634;GO:0005737;GO:0005737;GO:0005737;GO:0005739;GO:0005739;GO:0005739;GO:0005886;GO:0005886;GO:0006508;GO:0006508;GO:0006508;GO:0006979;GO:0007162;GO:0007507;GO:0007566;GO:0007566;GO:0007568;GO:…	K01398	matrix metallopeptidase 2 [Source:MGISymbol;Acc:MGI:97009]
MGP_C57BL6NJ_G0031692	62.5761	110.518	14.6343	0.132416	-2.91686	0.00424602	0.190934	6	131139417	131295963	-	2677	-	-	-	-
MGP_C57BL6NJ_G0035989	74.4449	23.6799	125.21	5.2876	2.40261	0.00424691	0.190934	9	130675861	130687444	+	6369	Ccr2	GO:0001525;GO:0001974;GO:0001974;GO:0002246;GO:0002548;GO:0002827;GO:0002829;GO:0004871;GO:0004930;GO:0004930;GO:0004950;GO:0005515;GO:0005737;GO:0005829;GO:0005886;GO:0005886;GO:0005886;GO:0005887;GO:0006874;GO:0006935;GO:0006935;GO:0006954;GO:0006954;GO:0006954;GO:0006955;GO:0006955;GO:0006955;GO:0006959;GO:0006968;GO:0007165;GO:0007186;GO:0007186;GO:0007204;GO:0009897;GO:0009897;GO:0010574;GO:…	K04177	chemokine (C-C motif) receptor 2 [Source:MGISymbol;Acc:MGI:106185]
MGP_C57BL6NJ_G0022138	21.9541	43.9082	0	0	-Inf	0.00427961	0.191282	15	9378210	9450229	-	6948	Npr3	GO:0001501;GO:0001501;GO:0001501;GO:0002158;GO:0002158;GO:0005622;GO:0007193;GO:0007194;GO:0007200;GO:0008217;GO:0008217;GO:0008217;GO:0008528;GO:0016020;GO:0016020;GO:0016021;GO:0016021;GO:0016941;GO:0016941;GO:0017046;GO:0030157;GO:0031404;GO:0032991;GO:0033688;GO:0033688;GO:0035810;GO:0035810;GO:0042277;GO:0042562;GO:0042803;GO:0043234;GO:0048015;GO:0048662;GO:0051000;GO:0070062;GO:0120163;GO:…	K12325	natriuretic peptide receptor 3 [Source:MGISymbol;Acc:MGI:97373]
MGP_C57BL6NJ_G0020457	53.759	12.5837	94.9343	7.54425	2.91538	0.00427997	0.191282	12	109315158	109322891	+	2065	Serpina3g	-	-	serine (or cysteine) peptidase inhibitor, clade A,member 3G [Source:MGI Symbol;Acc:MGI:105046]
MGP_C57BL6NJ_G0034104	188.703	71.8574	305.548	4.25215	2.08819	0.0043299	0.192942	8	55178525	55234770	-	5296	Neil3	GO:0000405;GO:0000405;GO:0003676;GO:0003677;GO:0003677;GO:0003684;GO:0003690;GO:0003690;GO:0003697;GO:0003697;GO:0003697;GO:0003824;GO:0003906;GO:0003906;GO:0003906;GO:0003906;GO:0003906;GO:0005634;GO:0005634;GO:0005634;GO:0005634;GO:0005654;GO:0006281;GO:0006281;GO:0006284;GO:0006284;GO:0006284;GO:0006284;GO:0006284;GO:0006289;GO:0006974;GO:0008152;GO:0008270;GO:0016787;GO:0016798;GO:0016799;GO:…	K10569	nei like 3 (E. coli) [Source:MGISymbol;Acc:MGI:2384588]
MGP_C57BL6NJ_G0035944	21.3141	40.0221	2.60597	0.0651131	-3.94091	0.00436835	0.193752	9	128000511	128036536	+	5564	Vipr1	GO:0004871;GO:0004888;GO:0004930;GO:0004930;GO:0004999;GO:0004999;GO:0004999;GO:0005886;GO:0007165;GO:0007166;GO:0007186;GO:0007186;GO:0007187;GO:0008528;GO:0016020;GO:0016020;GO:0016021;GO:0016021;GO:0017046;GO:0017046;GO:0043235;	K04589	vasoactive intestinal peptide receptor 1[Source:MGI Symbol;Acc:MGI:109272]
MGP_C57BL6NJ_G0030897	1862.84	760.927	2964.76	3.89624	1.96208	0.00437373	0.193752	6	11103549	11158736	-	5633	Bmt2	GO:0005730;GO:0008150;GO:0008168;GO:0016433;GO:0016433;GO:0016740;GO:0031167;GO:0032259;GO:0034198;GO:0034198;GO:0140007;GO:0140007;GO:1904047;GO:1904047;GO:1904262;GO:1904262;GO:1990130;GO:1990130;	K18849	base methyltransferase of 25S rRNA 2 [Source:MGISymbol;Acc:MGI:2141466]
MGP_C57BL6NJ_G0018462	147.546	248.98	46.1133	0.185209	-2.43277	0.00444892	0.196507	11	19227849	19235329	-	4115	Lgalsl	GO:0003674;GO:0005622;GO:0008150;GO:0030246;GO:0030246;GO:0062023;	-	lectin, galactoside binding-like [Source:MGISymbol;Acc:MGI:1916114]
MGP_C57BL6NJ_G0028781	35.3677	63.8018	6.93372	0.108676	-3.20189	0.00455487	0.2006	4	64103625	64277260	+	9288	Zfp618	GO:0003676;GO:0003677;GO:0005634;GO:0006351;GO:0006355;GO:0008150;GO:0046872;	-	zinc finger protein 618 [Source:MGISymbol;Acc:MGI:1919950]
MGP_C57BL6NJ_G0028223	766.929	307.845	1226.01	3.98257	1.9937	0.00459974	0.201987	3	122321392	122342290	-	8870	Vcam1	GO:0002102;GO:0005178;GO:0005178;GO:0005615;GO:0005769;GO:0005783;GO:0005794;GO:0005886;GO:0005887;GO:0005902;GO:0007155;GO:0007155;GO:0007155;GO:0007155;GO:0007157;GO:0007159;GO:0007160;GO:0007507;GO:0008131;GO:0009308;GO:0009897;GO:0009986;GO:0016020;GO:0016020;GO:0016021;GO:0016021;GO:0016032;GO:0030175;GO:0031225;GO:0035584;GO:0042102;GO:0042383;GO:0045177;GO:0050839;GO:0050901;GO:0055114;GO:…	K06527	vascular cell adhesion molecule 1 [Source:MGISymbol;Acc:MGI:98926]
MGP_C57BL6NJ_G0022428	422.562	721.158	123.966	0.171898	-2.54037	0.00471686	0.20653	15	80088764	80337004	-	7346	Rbfox2	GO:0000381;GO:0000381;GO:0000381;GO:0003676;GO:0003714;GO:0003714;GO:0003723;GO:0003723;GO:0003723;GO:0003729;GO:0003729;GO:0005515;GO:0005634;GO:0005634;GO:0005634;GO:0005634;GO:0005654;GO:0005737;GO:0005737;GO:0005829;GO:0006397;GO:0007399;GO:0008134;GO:0008134;GO:0008380;GO:0010724;GO:0021942;GO:0030520;GO:0030520;GO:0043484;GO:0045892;GO:0045892;GO:0048813;GO:0050885;GO:0000381;GO:0003729;GO:…	-	RNA binding protein, fox-1 homolog (C. elegans) 2[Source:MGI Symbol;Acc:MGI:1933973]
MGP_C57BL6NJ_G0035377	19.831	39.6619	0	0	-Inf	0.00476199	0.207187	9	59015279	59018235	-	2354	Islr	GO:0005576;GO:0005615;GO:0005615;GO:0007155;GO:0070062;	-	immunoglobulin superfamily containing leucine-richrepeat [Source:MGI Symbol;Acc:MGI:1349645]
MGP_C57BL6NJ_G0021557	17.5969	34.7595	0.434328	0.0124952	-6.32248	0.00478409	0.207187	14	28783217	28787732	-	852	Sncg	GO:0005515;GO:0005737;GO:0005737;GO:0005737;GO:0005815;GO:0005819;GO:0005856;GO:0005886;GO:0007268;GO:0007268;GO:0008344;GO:0008344;GO:0009306;GO:0009306;GO:0014059;GO:0014059;GO:0030424;GO:0030424;GO:0043014;GO:0043025;GO:0043025;GO:0043679;GO:0046928;GO:0046928;GO:0048471;GO:0048471;GO:0048487;GO:0050808;GO:0050808;GO:0070062;	-	synuclein, gamma [Source:MGISymbol;Acc:MGI:1298397]
MGP_C57BL6NJ_G0024280	8.16285	0	16.3257	Inf	Inf	0.00478485	0.207187	17	51857148	51954039	+	3224	Unc5cl	GO:0005042;GO:0006508;GO:0007165;GO:0016021;GO:0038007;	-	unc-5 family C-terminal like [Source:MGISymbol;Acc:MGI:1923839]
MGP_C57BL6NJ_G0027695	54.7683	104.807	4.72913	0.0451221	-4.47002	0.00478674	0.207187	3	67812391	67818286	+	2682	Ptx3	GO:0001550;GO:0001550;GO:0001849;GO:0001849;GO:0001872;GO:0001872;GO:0001878;GO:0001878;GO:0005515;GO:0005576;GO:0005615;GO:0005615;GO:0005615;GO:0005615;GO:0008228;GO:0008228;GO:0030198;GO:0030198;GO:0031012;GO:0031012;GO:0042802;GO:0044869;GO:0044871;GO:0045087;GO:0045087;GO:0045429;GO:0045429;GO:0046597;GO:0046790;GO:0050766;GO:0050766;GO:1903016;GO:1903019;	-	pentraxin related gene [Source:MGISymbol;Acc:MGI:104641]
MGP_C57BL6NJ_G0031239	926.264	256.596	1595.93	6.21964	2.63683	0.00482388	0.208199	6	58398747	58487067	+	9270	Herc6	GO:0002244;GO:0002244;GO:0002376;GO:0004842;GO:0004842;GO:0005634;GO:0005737;GO:0005737;GO:0005737;GO:0005829;GO:0005829;GO:0009617;GO:0009617;GO:0016567;GO:0016740;GO:0030332;GO:0045087;GO:0061630;GO:0061630;	K22372	hect domain and RLD 6 [Source:MGISymbol;Acc:MGI:1914388]
MGP_C57BL6NJ_G0024305	70.5699	21.241	119.899	5.6447	2.4969	0.00484829	0.208656	17	59784572	59801915	+	1783	Zfp959	GO:0003674;GO:0003676;GO:0005622;GO:0005634;GO:0006355;GO:0006355;GO:0046872;	-	zinc finger protein 959 [Source:MGISymbol;Acc:MGI:2385058]
MGP_C57BL6NJ_G0028623	2209.32	871.024	3547.61	4.07292	2.02606	0.00487255	0.209032	4	43118629	43126795	-	3422	Cd72	GO:0005887;GO:0016020;GO:0016021;GO:0030246;	-	CD72 antigen [Source:MGI Symbol;Acc:MGI:88345]"
MGP_C57BL6NJ_G0031307	98.686	190.914	6.45836	0.0338287	-4.88561	0.00489242	0.209032	6	74655743	74690611	-	2507	Atoh8	GO:0001704;GO:0001937;GO:0001937;GO:0003677;GO:0003700;GO:0003700;GO:0003700;GO:0005634;GO:0005634;GO:0005654;GO:0005737;GO:0006351;GO:0006355;GO:0006355;GO:0007275;GO:0007399;GO:0008134;GO:0010595;GO:0010595;GO:0010628;GO:0010629;GO:0016607;GO:0030154;GO:0030154;GO:0033613;GO:0035148;GO:0035148;GO:0045603;GO:0045603;GO:0045892;GO:0045893;GO:0045893;GO:0046983;GO:0051450;GO:0060395;GO:0060395;GO:…	-	atonal bHLH transcription factor 8 [Source:MGISymbol;Acc:MGI:1918343]
MGP_C57BL6NJ_G0016927	34.8252	65.388	4.26248	0.0651875	-3.93926	0.00491203	0.209032	1	144161052	144165232	-	2418	Shisa4	GO:0016020;GO:0016021;	-	shisa family member 4 [Source:MGISymbol;Acc:MGI:1924802]
MGP_C57BL6NJ_G0035626	491.23	199.66	782.801	3.92067	1.9711	0.00491237	0.209032	9	98521274	99102387	+	5698	Slc9a9	GO:0005768;GO:0005886;GO:0006810;GO:0006811;GO:0006812;GO:0006814;GO:0006814;GO:0006885;GO:0015297;GO:0015299;GO:0015385;GO:0015385;GO:0015386;GO:0016020;GO:0016021;GO:0016021;GO:0031902;GO:0051453;GO:0055037;GO:0055037;GO:0055085;GO:0071805;GO:0098719;GO:1902600;	K14725	solute carrier family 9 (sodium/hydrogenexchanger), member 9 [Source:MGI Symbol;Acc:MGI:2679732]
MGP_C57BL6NJ_G0035441	18.1528	35.8712	0.434328	0.012108	-6.3679	0.00498326	0.211453	9	66581451	66620168	+	6223	Igdcc4	GO:0003674;GO:0005886;GO:0005887;GO:0008150;GO:0016020;GO:0016021;	K22657	immunoglobulin superfamily, DCC subclass, member 4[Source:MGI Symbol;Acc:MGI:1858497]
MGP_C57BL6NJ_G0027378	696.172	259.211	1133.13	4.37147	2.12812	0.005009	0.211949	2	184627896	184644329	-	3529	Zbp1	GO:0002376;GO:0003677;GO:0003677;GO:0003677;GO:0003692;GO:0003723;GO:0003726;GO:0005515;GO:0005634;GO:0005634;GO:0005737;GO:0005829;GO:0005829;GO:0016032;GO:0042802;GO:0045087;GO:0051607;GO:0060340;GO:0060340;	K12965	Z-DNA binding protein 1 [Source:MGISymbol;Acc:MGI:1927449]
MGP_C57BL6NJ_G0016573	141.602	251.144	32.0591	0.127652	-2.96971	0.00503356	0.212394	1	78760226	78781436	-	4239	Ptprn	GO:0004721;GO:0004725;GO:0006470;GO:0016020;GO:0016021;GO:0016787;GO:0035335;	K07817	protein tyrosine phosphatase, receptor type, N[Source:MGI Symbol;Acc:MGI:102765]
MGP_C57BL6NJ_G0028255	270.05	437.921	102.179	0.233327	-2.09958	0.00506599	0.213016	3	129210376	129325637	+	4495	Bcar3	GO:0002089;GO:0033138;	-	breast cancer anti-estrogen resistance 3[Source:MGI Symbol;Acc:MGI:1352501]
MGP_C57BL6NJ_G0033197	2394.9	969.334	3820.47	3.94134	1.97868	0.0050765	0.213016	7	111763535	111811857	-	4313	Trim30a	GO:0003677;GO:0004842;GO:0005622;GO:0005634;GO:0005737;GO:0005737;GO:0005737;GO:0006351;GO:0006355;GO:0006914;GO:0008270;GO:0009617;GO:0009617;GO:0032715;GO:0032715;GO:0032720;GO:0032720;GO:0034122;GO:0034122;GO:0045087;GO:0045732;GO:0045732;GO:0046598;GO:0046598;GO:0046872;GO:0051607;GO:0051865;GO:0051865;GO:1900226;GO:1900226;GO:2000378;GO:2000378;	-	tripartite motif-containing 30A [Source:MGISymbol;Acc:MGI:98178]
MGP_C57BL6NJ_G0030294	69.4236	118.644	20.203	0.170282	-2.554	0.00509852	0.213347	5	115353749	115371567	+	2782	Fgfrl1	GO:0001501;GO:0001571;GO:0003179;GO:0005007;GO:0005007;GO:0005007;GO:0005794;GO:0005886;GO:0005886;GO:0005886;GO:0005887;GO:0007166;GO:0008201;GO:0008285;GO:0008543;GO:0016020;GO:0016021;GO:0017134;GO:0017134;GO:0030133;GO:0040037;GO:0044291;GO:0051260;GO:0060412;GO:0060539;GO:0098742;GO:0001501;GO:0003179;GO:0005007;GO:0005886;GO:0008285;GO:0017134;GO:0060412;GO:0060539;	-	fibroblast growth factor receptor-like 1[Source:MGI Symbol;Acc:MGI:2150920]
MGP_C57BL6NJ_G0019349	15.382	30.764	0	0	-Inf	0.00523283	0.21753	11	99504429	99577228	-	10110	Cacna1g	GO:0001508;GO:0002027;GO:0005216;GO:0005244;GO:0005245;GO:0005245;GO:0005248;GO:0005262;GO:0005515;GO:0005515;GO:0005737;GO:0005886;GO:0005886;GO:0005891;GO:0005891;GO:0005891;GO:0006811;GO:0006816;GO:0007204;GO:0007268;GO:0008332;GO:0008332;GO:0008332;GO:0010045;GO:0014824;GO:0016020;GO:0016020;GO:0016020;GO:0016021;GO:0019228;GO:0030425;GO:0034765;GO:0034765;GO:0035725;GO:0042391;GO:0043025;GO:…	K04854	calcium channel, voltage-dependent, T type, alpha1G subunit [Source:MGI Symbol;Acc:MGI:1201678]
MGP_C57BL6NJ_G0019199	1882.5	775.6	2989.39	3.8543	1.94647	0.00524914	0.21753	11	83793944	83822126	+	1785	Adap2	GO:0005096;GO:0005096;GO:0005545;GO:0005546;GO:0005546;GO:0005547;GO:0005547;GO:0005737;GO:0005737;GO:0005740;GO:0005740;GO:0005829;GO:0005886;GO:0005886;GO:0005886;GO:0007507;GO:0016020;GO:0043325;GO:0043325;GO:0043533;GO:0043533;GO:0043547;GO:0043547;GO:0046872;GO:0048017;GO:1902936;	-	ArfGAP with dual PH domains 2 [Source:MGISymbol;Acc:MGI:2663075]
MGP_C57BL6NJ_G0029466	14.2909	27.717	0.864774	0.0312002	-5.0023	0.0052505	0.21753	4	149313523	149331588	+	4242	Arhgef19	GO:0005085;GO:0005089;GO:0005096;GO:0032956;GO:0035023;GO:0042060;GO:0043547;GO:0042060;GO:0043547;	-	Rho guanine nucleotide exchange factor (GEF) 19[Source:MGI Symbol;Acc:MGI:1925912]
MGP_C57BL6NJ_G0025488	13.5351	27.0701	0	0	-Inf	0.00527688	0.21753	19	36661711	36666627	-	2719	Ppp1r3c	GO:0004721;GO:0005622;GO:0005975;GO:0005977;GO:0005977;GO:0005977;GO:0005978;GO:0005978;GO:0006470;GO:0006605;GO:0019888;GO:0019899;GO:0019903;GO:0019903;GO:0042587;GO:0043231;GO:0043666;GO:0050196;GO:0050790;	K07189	protein phosphatase 1, regulatory (inhibitor)subunit 3C [Source:MGI Symbol;Acc:MGI:1858229]
MGP_C57BL6NJ_G0018834	142.328	235.435	49.2208	0.209063	-2.25799	0.00527921	0.21753	11	63432312	63497256	-	5228	Epn2	GO:0001701;GO:0005515;GO:0005737;GO:0006897;GO:0006897;GO:0007219;GO:0008289;GO:0030100;GO:0030128;GO:0030128;GO:0030948;GO:0043231;GO:0045296;GO:0045747;GO:0048568;GO:1903671;	K12471	epsin 2 [Source:MGI Symbol;Acc:MGI:1333766]"
MGP_C57BL6NJ_G0023390	70.855	121.39	20.3197	0.167391	-2.57871	0.00528488	0.21753	16	89230960	89240246	-	5302	Adamts1	GO:0001542;GO:0001542;GO:0001822;GO:0001822;GO:0004222;GO:0004222;GO:0004222;GO:0005515;GO:0005576;GO:0005578;GO:0005578;GO:0005578;GO:0005578;GO:0005604;GO:0005604;GO:0005829;GO:0006508;GO:0006508;GO:0008201;GO:0008201;GO:0008201;GO:0008233;GO:0008237;GO:0008237;GO:0008270;GO:0010976;GO:0016525;GO:0016787;GO:0031012;GO:0031012;GO:0031012;GO:0031410;GO:0031410;GO:0046872;GO:0060347;GO:0060347;GO:…	K08617	a disintegrin-like and metallopeptidase (reprolysintype) with thrombospondin type 1 motif, 1 [Source:MGISymbol;Acc:MGI:109249]
MGP_C57BL6NJ_G0027768	30.8842	60.4673	1.30104	0.0215165	-5.53841	0.0053477	0.219517	3	88849099	89019922	-	5290	Fam160a1	-	-	family with sequence similarity 160, member A1[Source:MGI Symbol;Acc:MGI:2444746]
MGP_C57BL6NJ_G0022593	15.7494	1.36711	30.1318	22.0404	4.46208	0.005434	0.222455	15	88983016	88992606	-	7931	Gm29666	-	-	predicted gene 29666 [Source:MGISymbol;Acc:MGI:5580372]
MGP_C57BL6NJ_G0024874	261.833	423.088	100.579	0.237725	-2.07263	0.00547851	0.222964	18	61942917	61973261	-	1984	Smim3	GO:0003674;GO:0005575;GO:0008150;GO:0016020;GO:0016021;	-	small integral membrane protein 3 [Source:MGISymbol;Acc:MGI:1917088]
MGP_C57BL6NJ_G0019394	9.7365	19.473	0	0	-Inf	0.00548238	0.222964	11	101661426	101666564	+	2574	Hoxb9	GO:0000977;GO:0000977;GO:0001228;GO:0003677;GO:0003677;GO:0005634;GO:0005634;GO:0005654;GO:0005739;GO:0006351;GO:0006351;GO:0006355;GO:0006355;GO:0006366;GO:0007275;GO:0009952;GO:0009952;GO:0030879;GO:0030879;GO:0043565;GO:0045944;GO:0045944;GO:0048706;GO:0048706;GO:0060070;GO:0060326;GO:0090575;GO:0090575;	K09294	homeobox B9 [Source:MGI Symbol;Acc:MGI:96190]"
MGP_C57BL6NJ_G0029397	4496.67	1804.22	7189.12	3.98461	1.99444	0.00549071	0.222964	4	144448989	144454906	-	1088	C1qb	GO:0002376;GO:0005576;GO:0005581;GO:0005602;GO:0005615;GO:0005615;GO:0006958;GO:0006958;GO:0042803;GO:0042803;GO:0045087;GO:0048839;GO:0048839;GO:0070062;GO:0072562;	K03987	complement component 1, q subcomponent, betapolypeptide [Source:MGI Symbol;Acc:MGI:88224]
MGP_C57BL6NJ_G0029535	90.5328	28.4466	152.619	5.36511	2.42361	0.0055068	0.223018	4	156686887	156694969	+	1970	Zfp985	GO:0003674;GO:0003676;GO:0005575;GO:0005622;GO:0006355;GO:0008150;GO:0046872;	K09228	zinc finger protein 985 [Source:MGISymbol;Acc:MGI:3651986]
MGP_C57BL6NJ_G0031218	988.799	1586.29	391.313	0.246685	-2.01926	0.00553873	0.223235	6	57571692	57623351	+	3314	Fkbp9	GO:0000413;GO:0003755;GO:0003755;GO:0005509;GO:0005509;GO:0005509;GO:0005528;GO:0005783;GO:0005783;GO:0005788;GO:0006457;GO:0006457;GO:0016853;GO:0046872;GO:0061077;	K09575	FK506 binding protein 9 [Source:MGISymbol;Acc:MGI:1350921]
MGP_C57BL6NJ_G0033834	271.555	503.805	39.3044	0.0780151	-3.6801	0.00554172	0.223235	8	5962494	6006662	-	4324	Efnb2	GO:0001525;GO:0001945;GO:0001945;GO:0002042;GO:0002042;GO:0004713;GO:0005102;GO:0005102;GO:0005515;GO:0005886;GO:0005886;GO:0005886;GO:0005886;GO:0005925;GO:0007155;GO:0007155;GO:0007275;GO:0007399;GO:0007411;GO:0008284;GO:0009887;GO:0009887;GO:0010839;GO:0010839;GO:0010977;GO:0016020;GO:0016020;GO:0016021;GO:0016477;GO:0018108;GO:0030154;GO:0031295;GO:0031295;GO:0046875;GO:0046875;GO:0046875;GO:…	K05463	ephrin B2 [Source:MGI Symbol;Acc:MGI:105097]"
MGP_C57BL6NJ_G0035559	266.316	102.456	430.175	4.19861	2.06991	0.00562001	0.225071	9	81066956	81080990	-	2704	Mb21d1	GO:0000166;GO:0002218;GO:0002218;GO:0002230;GO:0002230;GO:0002376;GO:0003677;GO:0003677;GO:0003682;GO:0003682;GO:0003690;GO:0003690;GO:0005515;GO:0005524;GO:0005525;GO:0005737;GO:0005829;GO:0005829;GO:0006974;GO:0006974;GO:0009190;GO:0009190;GO:0010753;GO:0010753;GO:0016740;GO:0016779;GO:0032481;GO:0032481;GO:0038001;GO:0038001;GO:0043950;GO:0043950;GO:0045087;GO:0046872;GO:0051607;GO:0051607;GO:…	-	Mab-21 domain containing 1 [Source:MGISymbol;Acc:MGI:2442261]
MGP_C57BL6NJ_G0022256	45.495	79.7172	11.2728	0.14141	-2.82205	0.00562483	0.225071	15	55979600	56068474	-	3473	Enpp2	GO:0001953;GO:0001953;GO:0003676;GO:0003824;GO:0004528;GO:0004528;GO:0004528;GO:0004551;GO:0004551;GO:0004622;GO:0004622;GO:0004622;GO:0004622;GO:0004622;GO:0005044;GO:0005509;GO:0005509;GO:0005509;GO:0005509;GO:0005576;GO:0005615;GO:0005615;GO:0005615;GO:0005615;GO:0005737;GO:0005737;GO:0005794;GO:0005794;GO:0005887;GO:0006629;GO:0006644;GO:0006644;GO:0006898;GO:0006935;GO:0006935;GO:0006955;GO:…	K01122	ectonucleotide pyrophosphatase/phosphodiesterase 2[Source:MGI Symbol;Acc:MGI:1321390]
MGP_C57BL6NJ_G0027974	60.8585	104.383	17.3343	0.166065	-2.59018	0.00563957	0.225071	3	98785867	98859304	-	3034	Tuft1	GO:0005515;GO:0005576;GO:0005622;GO:0005737;GO:0005737;GO:0031214;GO:0035556;	-	tuftelin 1 [Source:MGI Symbol;Acc:MGI:109572]"
MGP_C57BL6NJ_G0031910	893.698	1427.42	359.981	0.252191	-1.98741	0.00564688	0.225071	6	151328683	151347760	-	1625	Ldhb	GO:0003824;GO:0004457;GO:0004459;GO:0004459;GO:0004459;GO:0004459;GO:0005737;GO:0005737;GO:0005739;GO:0005739;GO:0005829;GO:0005975;GO:0006089;GO:0016020;GO:0016491;GO:0016491;GO:0016616;GO:0019244;GO:0019674;GO:0019752;GO:0019900;GO:0042802;GO:0043209;GO:0043209;GO:0045121;GO:0051287;GO:0055114;GO:0055114;GO:0070062;	K00016	lactate dehydrogenase B [Source:MGISymbol;Acc:MGI:96763]
MGP_C57BL6NJ_G0026133	138.009	49.8998	226.118	4.53145	2.17997	0.00567366	0.225543	2	44036787	44718081	+	8818	Arhgap15	GO:0005096;GO:0005096;GO:0005737;GO:0005737;GO:0007165;GO:0008360;GO:0016020;GO:0043087;GO:0043547;	-	Rho GTPase activating protein 15 [Source:MGISymbol;Acc:MGI:1923367]
MGP_C57BL6NJ_G0018407	49.83	12.8477	86.8123	6.75702	2.75639	0.00571798	0.226708	11	3142571	3242742	-	8866	Camk2b	GO:0000082;GO:0000166;GO:0002030;GO:0004672;GO:0004674;GO:0004674;GO:0004674;GO:0004683;GO:0004683;GO:0004683;GO:0004683;GO:0005515;GO:0005516;GO:0005516;GO:0005516;GO:0005524;GO:0005524;GO:0005737;GO:0005737;GO:0005815;GO:0005829;GO:0005856;GO:0006468;GO:0006816;GO:0007399;GO:0007399;GO:0010976;GO:0010976;GO:0014069;GO:0016020;GO:0016021;GO:0016301;GO:0016310;GO:0016529;GO:0016740;GO:0018105;GO:…	K04515	calcium/calmodulin-dependent protein kinase II,beta [Source:MGI Symbol;Acc:MGI:88257]
MGP_C57BL6NJ_G0017842	32.1986	57.8997	6.49745	0.112219	-3.15561	0.00581719	0.230038	10	82928044	82947969	-	5487	Shc2	GO:0000187;GO:0005622;GO:0005886;GO:0007169;GO:0030971;GO:0030971;GO:0035556;	K17447	SHC (Src homology 2 domain containing) transformingprotein 2 [Source:MGI Symbol;Acc:MGI:106180]
MGP_C57BL6NJ_G0019603	17.5714	33.4195	1.72341	0.051569	-4.27735	0.00587081	0.231552	11	107960060	107977655	-	3126	Etv4	GO:0000978;GO:0000981;GO:0003677;GO:0003677;GO:0003700;GO:0005622;GO:0005634;GO:0005634;GO:0005634;GO:0005634;GO:0005730;GO:0006351;GO:0006355;GO:0006355;GO:0006357;GO:0008045;GO:0010628;GO:0030154;GO:0033600;GO:0043565;GO:0045893;GO:0045944;GO:0048863;GO:0060444;GO:0060762;GO:0003677;GO:0005622;GO:0005634;GO:0008045;GO:0010628;GO:0033600;GO:0045893;GO:0045944;GO:0048863;GO:0060444;GO:0060762;	K15592	ets variant 4 [Source:MGI Symbol;Acc:MGI:99423]"
MGP_C57BL6NJ_G0035425	93.929	175.775	12.0833	0.068743	-3.86264	0.0059004	0.231575	9	65300432	65372673	-	3205	Smad6	GO:0000978;GO:0001657;GO:0001657;GO:0003148;GO:0003148;GO:0003170;GO:0003170;GO:0003180;GO:0003183;GO:0003183;GO:0003184;GO:0003184;GO:0003281;GO:0003281;GO:0003677;GO:0003682;GO:0003682;GO:0003700;GO:0005515;GO:0005515;GO:0005622;GO:0005634;GO:0005634;GO:0005667;GO:0005794;GO:0005829;GO:0006351;GO:0006355;GO:0006355;GO:0006955;GO:0007179;GO:0007352;GO:0008285;GO:0010991;GO:0016604;GO:0030279;GO:…	K04677	SMAD family member 6 [Source:MGISymbol;Acc:MGI:1336883]
MGP_C57BL6NJ_G0028399	9.96316	19.9263	0	0	-Inf	0.00591905	0.231575	3	160764460	160805939	-	6778	Ptgfr	GO:0004871;GO:0004930;GO:0004930;GO:0004955;GO:0004958;GO:0004958;GO:0004958;GO:0005737;GO:0005886;GO:0005886;GO:0006954;GO:0007165;GO:0007186;GO:0007186;GO:0007189;GO:0007204;GO:0008284;GO:0010628;GO:0010628;GO:0016020;GO:0016021;GO:0016021;GO:0032355;GO:0032355;GO:0032496;GO:0032496;GO:0035584;GO:0043066;GO:0043066;GO:0071799;	K04262	prostaglandin F receptor [Source:MGISymbol;Acc:MGI:97796]
MGP_C57BL6NJ_G0021279	49.0332	13.8343	84.2322	6.08867	2.60613	0.00593021	0.231575	13	105756421	105790604	-	1784	Cenph	GO:0000278;GO:0000775;GO:0000776;GO:0000776;GO:0000776;GO:0000776;GO:0000777;GO:0005515;GO:0005634;GO:0005634;GO:0005634;GO:0005694;GO:0005730;GO:0007059;GO:0043515;GO:0043515;GO:0043515;GO:0051382;GO:0051383;	K11500	centromere protein H [Source:MGISymbol;Acc:MGI:1349448]
MGP_C57BL6NJ_G0031964	460.611	912.123	9.09954	0.00997622	-6.64729	0.00593272	0.231575	7	506259	512603	-	1847	Oscar	GO:0005515;GO:0005886;GO:0009986;GO:0009986;GO:0016020;GO:0016021;GO:0030316;GO:0030316;GO:0032623;GO:0032623;GO:0038064;GO:0038064;GO:0038065;GO:0038094;GO:0038094;GO:0045780;GO:0045780;GO:0070062;GO:0072674;GO:0072674;	K14377	osteoclast associated receptor [Source:MGISymbol;Acc:MGI:2179720]
MGP_C57BL6NJ_G0028355	619.777	251.457	988.096	3.92948	1.97434	0.00595813	0.231773	3	150789894	150811964	+	5614	Gbp7	GO:0000166;GO:0003674;GO:0003924;GO:0005525;GO:0005525;GO:0020005;GO:0031410;GO:0042832;GO:0044406;GO:0050830;GO:0071346;GO:0020005;GO:0031410;GO:0042832;GO:0044406;GO:0050830;GO:0071346;	K20899	guanylate binding protein 7 [Source:MGISymbol;Acc:MGI:2444421]
MGP_C57BL6NJ_G0035573	117.954	203.806	32.1028	0.157516	-2.66643	0.00597314	0.231773	9	84481439	84486954	-	4702	Htr1b	GO:0002031;GO:0002031;GO:0004871;GO:0004930;GO:0004930;GO:0004930;GO:0004993;GO:0004993;GO:0004993;GO:0004993;GO:0004993;GO:0005737;GO:0005737;GO:0005886;GO:0005886;GO:0005886;GO:0005887;GO:0005887;GO:0005887;GO:0005887;GO:0007165;GO:0007186;GO:0007186;GO:0007187;GO:0007193;GO:0007198;GO:0007198;GO:0007205;GO:0007205;GO:0007268;GO:0007268;GO:0007268;GO:0007610;GO:0007631;GO:0007631;GO:0008144;GO:…	K04153	5-hydroxytryptamine (serotonin) receptor 1B[Source:MGI Symbol;Acc:MGI:96274]
MGP_C57BL6NJ_G0027315	51.2338	89.072	13.3956	0.150391	-2.73321	0.00598381	0.231773	2	175875756	175890228	-	8099	Zfp334	GO:0003676;GO:0003700;GO:0005575;GO:0005622;GO:0006355;GO:0006355;GO:0046872;	K09228	zinc finger protein 334 [Source:MGISymbol;Acc:MGI:2388656]
MGP_C57BL6NJ_G0018597	23.0632	45.2659	0.860575	0.0190116	-5.71698	0.00601803	0.232227	11	47218481	48373137	-	8243	Sgcd	GO:0005515;GO:0005737;GO:0005856;GO:0005886;GO:0005887;GO:0007517;GO:0016010;GO:0016011;GO:0016012;GO:0016012;GO:0016012;GO:0016020;GO:0016021;GO:0016021;GO:0042383;GO:0042383;GO:0042383;GO:0048738;GO:0055001;GO:0060047;GO:0061024;GO:0016011;GO:0016012;GO:0042383;	-	sarcoglycan, delta (dystrophin-associatedglycoprotein) [Source:MGI Symbol;Acc:MGI:1346525]
MGP_C57BL6NJ_G0027138	48.2993	88.414	8.18466	0.092572	-3.43328	0.00602628	0.232227	2	163766699	163799425	-	3082	Snta1	GO:0002027;GO:0003117;GO:0003779;GO:0005198;GO:0005515;GO:0005515;GO:0005515;GO:0005516;GO:0005622;GO:0005622;GO:0005737;GO:0005856;GO:0005886;GO:0007528;GO:0016010;GO:0016020;GO:0017080;GO:0030054;GO:0030165;GO:0031594;GO:0031594;GO:0032991;GO:0042383;GO:0042383;GO:0042383;GO:0043234;GO:0044325;GO:0044325;GO:0045202;GO:0045211;GO:0050998;GO:0051117;GO:0060307;GO:0065009;GO:0086005;GO:1902083;GO:…	-	syntrophin, acidic 1 [Source:MGISymbol;Acc:MGI:101772]
MGP_C57BL6NJ_G0025995	284.331	521.207	47.4548	0.0910478	-3.45723	0.00606999	0.233316	2	30126510	30170297	-	3434	Ptges	GO:0001516;GO:0001516;GO:0004364;GO:0004667;GO:0005641;GO:0005641;GO:0005737;GO:0005737;GO:0005739;GO:0006629;GO:0006631;GO:0006633;GO:0006693;GO:0006693;GO:0006693;GO:0006749;GO:0008285;GO:0008285;GO:0016020;GO:0016021;GO:0016021;GO:0016853;GO:0043231;GO:0043295;GO:0043295;GO:0048471;GO:0050220;GO:0050220;GO:0055114;	K15729	prostaglandin E synthase [Source:MGISymbol;Acc:MGI:1927593]
MGP_C57BL6NJ_G0026190	1432.42	585.384	2279.45	3.89394	1.96123	0.00611011	0.234262	2	64110273	64164912	-	8165	Ifih1	GO:0000166;GO:0002376;GO:0003677;GO:0003723;GO:0003725;GO:0003725;GO:0003727;GO:0003727;GO:0004386;GO:0005515;GO:0005524;GO:0005524;GO:0005634;GO:0005737;GO:0005737;GO:0008270;GO:0008270;GO:0009615;GO:0009615;GO:0016787;GO:0016787;GO:0016925;GO:0016925;GO:0032727;GO:0032727;GO:0032728;GO:0032728;GO:0035549;GO:0035549;GO:0039530;GO:0039530;GO:0042802;GO:0043021;GO:0045087;GO:0045087;GO:0046872;GO:…	K12647	interferon induced with helicase C domain 1[Source:MGI Symbol;Acc:MGI:1918836]
MGP_C57BL6NJ_G0026565	2461.24	997.889	3924.58	3.93289	1.97559	0.00612914	0.234292	2	95757176	95778649	-	2515	Nr1h3	GO:0000122;GO:0000978;GO:0001077;GO:0003677;GO:0003700;GO:0004879;GO:0005634;GO:0005737;GO:0006355;GO:0010875;GO:0010887;GO:0042632;GO:0042632;GO:0043031;GO:0044212;GO:0044255;GO:0045861;GO:0045892;GO:0045893;GO:0045944;GO:0050728;GO:0055088;GO:0055092;GO:0070328;GO:0071222;GO:0090188;GO:0090341;GO:0090575;GO:0120163;GO:2000188;	K08536	nuclear receptor subfamily 1, group H, member 3[Source:MGI Symbol;Acc:MGI:1352462]
MGP_C57BL6NJ_G0031183	34.7881	67.8389	1.73731	0.0256094	-5.28718	0.0061419	0.234292	6	52600579	52608558	-	5577	Hoxa9	GO:0000978;GO:0000978;GO:0001077;GO:0003677;GO:0003677;GO:0005515;GO:0005515;GO:0005634;GO:0005634;GO:0005634;GO:0005634;GO:0005667;GO:0005667;GO:0005737;GO:0005737;GO:0006351;GO:0006351;GO:0006355;GO:0006355;GO:0006366;GO:0007275;GO:0007283;GO:0007283;GO:0007338;GO:0007338;GO:0008584;GO:0008584;GO:0009952;GO:0009952;GO:0009954;GO:0009954;GO:0010468;GO:0010468;GO:0019899;GO:0030879;GO:0030879;GO:…	K21950	homeobox A9 [Source:MGI Symbol;Acc:MGI:96180]"
MGP_C57BL6NJ_G0022343	7.7455	0	15.491	Inf	Inf	0.00619843	0.234876	15	77358739	77360303	-	744	Ly6d	GO:0005886;GO:0009986;GO:0009986;GO:0016020;GO:0030098;GO:0030098;GO:0031225;GO:0035634;GO:0035634;	K06846	lymphocyte antigen 6 complex, locus D [Source:MGISymbol;Acc:MGI:96881]
MGP_C57BL6NJ_G0019095	11.7158	23.4316	0	0	-Inf	0.00619999	0.234876	11	78271023	78275977	-	3750	Hic1	GO:0000122;GO:0003676;GO:0003700;GO:0008630;	-	hypermethylated in cancer 1 [Source:MGISymbol;Acc:MGI:1338010]
MGP_C57BL6NJ_G0020132	19.946	2.84696	37.0451	13.0122	3.70179	0.00622284	0.234876	12	55762713	55771900	+	620	-	-	-	-
MGP_C57BL6NJ_G0027640	7.73175	0	15.4635	Inf	Inf	0.00622379	0.234876	3	55922288	55961166	+	3334	Ccdc169	GO:0003674;GO:0005575;GO:0008150;	-	coiled-coil domain containing 169 [Source:MGISymbol;Acc:MGI:2444356]
MGP_C57BL6NJ_G0026338	467.474	749.001	185.947	0.248259	-2.01008	0.00623495	0.234876	2	88411090	88436094	+	6186	Tnks1bp1	-	-	tankyrase 1 binding protein 1 [Source:MGISymbol;Acc:MGI:2446193]
MGP_C57BL6NJ_G0034916	108.115	208.111	8.11906	0.0390132	-4.6799	0.00635137	0.238666	9	18649811	18696697	-	6809	Col5a3	GO:0005198;GO:0005201;GO:0005201;GO:0005581;GO:0005588;GO:0005588;GO:0005588;GO:0005615;GO:0007155;GO:0007160;GO:0007160;GO:0008201;GO:0008201;GO:0008201;GO:0030020;GO:0030198;GO:0030198;GO:0030199;GO:0031012;GO:0031012;GO:0043394;GO:0062023;GO:0062023;GO:0070062;	K19721	collagen, type V, alpha 3 [Source:MGISymbol;Acc:MGI:1858212]
MGP_C57BL6NJ_G0035256	9.31236	18.6247	0	0	-Inf	0.00649826	0.24358	9	48730370	48743621	-	1576	Nnmt	GO:0005829;GO:0008112;GO:0032259;	-	nicotinamide N-methyltransferase [Source:MGISymbol;Acc:MGI:1099443]
MGP_C57BL6NJ_G0029489	136.924	224.668	49.1795	0.218898	-2.19167	0.00652048	0.243808	4	150264519	150416242	-	10516	-	-	-	-
MGP_C57BL6NJ_G0035621	14.8241	29.6482	0	0	-Inf	0.00656229	0.244765	9	95934211	95957280	+	1743	Plscr2	GO:0005515;GO:0005634;GO:0005737;GO:0005886;GO:0016020;GO:0016021;GO:0017121;GO:0017121;GO:0017124;GO:0017128;GO:0046872;GO:0070782;GO:0071222;GO:0005634;GO:0005737;GO:0071222;	-	phospholipid scramblase 2 [Source:MGISymbol;Acc:MGI:1270860]
MGP_C57BL6NJ_G0033049	73.7313	140.562	6.90076	0.0490941	-4.34831	0.0065923	0.245279	7	107076208	107117671	+	3043	P4ha3	GO:0004656;GO:0005506;GO:0005783;GO:0016491;GO:0016702;GO:0016705;GO:0019511;GO:0031418;GO:0046872;GO:0055114;	K00472	procollagen-proline, 2-oxoglutarate 4-dioxygenase(proline 4-hydroxylase), alpha polypeptide III [Source:MGISymbol;Acc:MGI:2444049]
MGP_C57BL6NJ_G0029724	45.1233	83.2974	6.94925	0.0834269	-3.58334	0.00664233	0.246533	5	10557789	10812055	+	8595	Sema3d	GO:0001755;GO:0005576;GO:0005615;GO:0005615;GO:0005615;GO:0005887;GO:0007275;GO:0007399;GO:0016020;GO:0016021;GO:0030154;GO:0030215;GO:0030335;GO:0038191;GO:0045499;GO:0048843;GO:0050919;GO:0071526;	K06840	sema domain, immunoglobulin domain (Ig), shortbasic domain, secreted, (semaphorin) 3D [Source:MGISymbol;Acc:MGI:1860118]
MGP_C57BL6NJ_G0036509	15.3844	1.87799	28.8908	15.3839	3.94335	0.0066653	0.24678	X	107103079	107147901	+	5346	Gpr174	GO:0004871;GO:0004930;GO:0004930;GO:0004930;GO:0005886;GO:0005886;GO:0005887;GO:0007165;GO:0007186;GO:0007186;GO:0016020;GO:0016021;GO:0016021;GO:0035025;GO:0043029;GO:0045125;GO:0051482;GO:0043029;GO:0045125;	K08391	G protein-coupled receptor 174 [Source:MGISymbol;Acc:MGI:2685222]
MGP_C57BL6NJ_G0025479	1402.76	591.489	2214.04	3.74316	1.90426	0.00669414	0.247091	19	34399342	34411059	+	2656	Ifit1	GO:0002376;GO:0003723;GO:0003723;GO:0005515;GO:0005737;GO:0005737;GO:0005829;GO:0009615;GO:0009615;GO:0009617;GO:0009617;GO:0035457;GO:0035457;GO:0035458;GO:0035458;GO:0045087;GO:0051607;GO:0051607;	K14217	interferon-induced protein with tetratricopeptiderepeats 1 [Source:MGI Symbol;Acc:MGI:99450]
MGP_C57BL6NJ_G0018171	69.7106	135.082	4.3394	0.0321242	-4.96019	0.00671791	0.247091	10	128190850	128326395	-	1283	Msrb3	-	-	methionine sulfoxide reductase B3 [Source:MGISymbol;Acc:MGI:2443538]
MGP_C57BL6NJ_G0029072	9.09908	18.1982	0	0	-Inf	0.00674157	0.247091	4	122783835	122811436	+	1713	Tmem53	GO:0003674;GO:0005634;GO:0008150;GO:0016020;GO:0016021;	-	transmembrane protein 53 [Source:MGISymbol;Acc:MGI:1916027]
MGP_C57BL6NJ_G0018204	51.2134	100.263	2.16356	0.0215788	-5.53424	0.00675856	0.247091	10	135200513	135208150	-	2487	Arhgef25	GO:0005089;GO:0035023;GO:0065009;	K20690	Rho guanine nucleotide exchange factor (GEF) 25[Source:MGI Symbol;Acc:MGI:1277173]
MGP_C57BL6NJ_G0025929	27.3584	49.5204	5.19641	0.104935	-3.25243	0.00679519	0.247091	2	26014924	26076894	-	5432	Sardh	GO:0005739;	K00314	sarcosine dehydrogenase [Source:MGISymbol;Acc:MGI:2183102]
MGP_C57BL6NJ_G0034452	114.311	218.308	10.3133	0.0472421	-4.40378	0.00680811	0.247091	8	99069642	99070591	+	556	Mt2	GO:0005634;GO:0005634;GO:0005737;GO:0005737;GO:0005829;GO:0006882;GO:0006882;GO:0006882;GO:0007263;GO:0007263;GO:0008270;GO:0008270;GO:0009617;GO:0009617;GO:0010273;GO:0010273;GO:0010273;GO:0045926;GO:0046872;GO:0046872;GO:0046872;GO:0048471;GO:0071276;GO:0071280;GO:0071294;GO:0071294;	-	metallothionein 2 [Source:MGISymbol;Acc:MGI:97172]
MGP_C57BL6NJ_G0016356	168.612	306.081	31.143	0.101747	-3.29693	0.00682258	0.247091	1	40612725	40709659	+	6381	Il1r1	GO:0002020;GO:0002020;GO:0004871;GO:0004871;GO:0004908;GO:0004908;GO:0004908;GO:0004909;GO:0005161;GO:0005515;GO:0005515;GO:0005515;GO:0005576;GO:0005615;GO:0005634;GO:0005886;GO:0006954;GO:0007165;GO:0009314;GO:0009897;GO:0009897;GO:0009986;GO:0009986;GO:0009986;GO:0010286;GO:0014069;GO:0016020;GO:0016020;GO:0016021;GO:0019221;GO:0019221;GO:0019966;GO:0019966;GO:0030424;GO:0032729;GO:0032729;GO:…	K04386	interleukin 1 receptor, type I [Source:MGISymbol;Acc:MGI:96545]
MGP_C57BL6NJ_G0030144	65.0996	126.308	3.89085	0.0308044	-5.02072	0.0068421	0.247091	5	93560072	93935415	+	10911	Slc4a4	GO:0005452;GO:0005515;GO:0005515;GO:0005515;GO:0005886;GO:0005887;GO:0005887;GO:0006810;GO:0006811;GO:0006814;GO:0006814;GO:0006820;GO:0006885;GO:0008509;GO:0008510;GO:0008510;GO:0008510;GO:0015293;GO:0015698;GO:0015701;GO:0015701;GO:0015701;GO:0016020;GO:0016020;GO:0016021;GO:0016021;GO:0016323;GO:0016323;GO:0035725;GO:0042802;GO:0051453;GO:0055085;GO:0070062;GO:0098656;	K13575	solute carrier family 4 (anion exchanger), member 4[Source:MGI Symbol;Acc:MGI:1927555]
MGP_C57BL6NJ_G0023100	129.885	251.229	8.54111	0.0339973	-4.87844	0.00684358	0.247091	16	21570293	21643281	-	3636	Masp1	GO:0001867;GO:0001867;GO:0001867;GO:0002376;GO:0004252;GO:0004252;GO:0004252;GO:0004252;GO:0004252;GO:0005509;GO:0005509;GO:0005509;GO:0005576;GO:0005615;GO:0005615;GO:0005615;GO:0005615;GO:0006508;GO:0006508;GO:0008233;GO:0008236;GO:0016787;GO:0042803;GO:0042803;GO:0045087;GO:0046872;GO:0048306;	K03992	mannan-binding lectin serine peptidase 1[Source:MGI Symbol;Acc:MGI:88492]
MGP_C57BL6NJ_G0022571	22.1947	40.9553	3.43422	0.083853	-3.57599	0.00685941	0.247091	15	87139262	87174142	-	2142	A4galt	GO:0000139;GO:0001576;GO:0005794;GO:0006486;GO:0006629;GO:0007009;GO:0008378;GO:0015643;GO:0016020;GO:0016020;GO:0016021;GO:0016740;GO:0016757;GO:0050512;GO:0050512;GO:0070062;GO:0001576;GO:0015643;GO:0050512;	K01988	alpha 1,4-galactosyltransferase [Source:MGISymbol;Acc:MGI:3512453]
MGP_C57BL6NJ_G0027303	4673.23	1992.52	7353.94	3.69078	1.88393	0.0068635	0.247091	2	175281046	175298848	-	2562	Pltp	GO:0005319;GO:0005548;GO:0005576;GO:0005615;GO:0005615;GO:0005615;GO:0006629;GO:0006810;GO:0006869;GO:0006869;GO:0008289;GO:0008429;GO:0008525;GO:0010189;GO:0010875;GO:0015914;GO:0019992;GO:0030317;GO:0031210;GO:0034364;GO:0034375;GO:0035620;GO:0035627;GO:0070300;GO:0097001;GO:1901611;GO:1904121;GO:1990050;GO:0005615;GO:0010189;GO:0030317;	-	phospholipid transfer protein [Source:MGISymbol;Acc:MGI:103151]
MGP_C57BL6NJ_G0021354	9.30838	18.6168	0	0	-Inf	0.00686999	0.247091	13	125165469	125311590	+	4565	Fgf10	GO:0000132;GO:0001759;GO:0001974;GO:0003338;GO:0005615;GO:0006935;GO:0007267;GO:0007368;GO:0007435;GO:0008284;GO:0008285;GO:0008544;GO:0008589;GO:0009880;GO:0009887;GO:0010468;GO:0010631;GO:0010634;GO:0021983;GO:0030177;GO:0030324;GO:0030538;GO:0030855;GO:0030878;GO:0030916;GO:0030949;GO:0031016;GO:0031069;GO:0031076;GO:0032808;GO:0032925;GO:0035019;GO:0035108;GO:0035265;GO:0042056;GO:0042472;GO:…	K04358	fibroblast growth factor 10 [Source:MGISymbol;Acc:MGI:1099809]
MGP_C57BL6NJ_G0021889	101.633	36.9757	166.29	4.49727	2.16905	0.00689146	0.247274	14	63239428	63256488	-	4010	Esco2	GO:0000785;GO:0000785;GO:0001741;GO:0001741;GO:0002244;GO:0002244;GO:0004468;GO:0004468;GO:0005634;GO:0005634;GO:0005694;GO:0005694;GO:0005794;GO:0006275;GO:0006275;GO:0006275;GO:0006302;GO:0006302;GO:0007049;GO:0007059;GO:0007059;GO:0007062;GO:0010369;GO:0010369;GO:0016407;GO:0016407;GO:0016740;GO:0016746;GO:0030054;GO:0031618;GO:0031618;GO:0034421;GO:0034421;GO:0035861;GO:0035861;GO:0046872;GO:…	K11268	establishment of sister chromatid cohesion N-acetyltransferase 2 [Source:MGI Symbol;Acc:MGI:1919238]
MGP_C57BL6NJ_G0029728	23.2254	46.4508	0	0	-Inf	0.00697722	0.249078	5	12477077	12718986	+	9298	Sema3e	GO:0001569;GO:0001953;GO:0002040;GO:0005615;GO:0008360;GO:0016525;GO:0030215;GO:0050808;GO:0071526;GO:2000249;	K06840	sema domain, immunoglobulin domain (Ig), shortbasic domain, secreted, (semaphorin) 3E [Source:MGISymbol;Acc:MGI:1340034]
MGP_C57BL6NJ_G0032426	7.57212	0	15.1442	Inf	Inf	0.00698957	0.249078	7	28978263	29019721	-	6546	-	-	-	-
MGP_C57BL6NJ_G0029304	2395.58	967.222	3823.93	3.95352	1.98314	0.00699119	0.249078	4	139841486	139857292	-	3079	Themis2	GO:0002376;GO:0005515;GO:0005634;GO:0005634;GO:0005737;GO:0005737;GO:0006954;GO:0050852;GO:0050852;	-	thymocyte selection associated family member 2[Source:MGI Symbol;Acc:MGI:2446213]
MGP_C57BL6NJ_G0020558	157.5	302.515	12.485	0.0412706	-4.59874	0.00706321	0.250779	12	119182003	119186937	+	1675	Crip2	GO:0005515;GO:0005938;GO:0005938;GO:0008284;GO:0008284;GO:0030097;GO:0030097;GO:0046872;	-	cysteine rich protein 2 [Source:MGISymbol;Acc:MGI:1915587]
MGP_C57BL6NJ_G0025275	47.8844	90.1342	5.63462	0.0625136	-3.99969	0.00708411	0.250779	19	8585582	8597511	-	4069	Tmem132a	GO:0000139;GO:0003674;GO:0005783;GO:0005783;GO:0005783;GO:0005789;GO:0005794;GO:0005794;GO:0005794;GO:0016020;GO:0016021;GO:0016021;GO:0043069;GO:0070062;	K17599	transmembrane protein 132A [Source:MGISymbol;Acc:MGI:2147810]
MGP_C57BL6NJ_G0034980	43.7799	85.8225	1.73731	0.0202431	-5.62643	0.00708875	0.250779	9	21409458	21679304	+	3793	Bmper	GO:0001657;GO:0001657;GO:0002043;GO:0005201;GO:0005515;GO:0005576;GO:0005576;GO:0005576;GO:0005615;GO:0005615;GO:0005615;GO:0010594;GO:0030514;GO:0030514;GO:0042118;GO:0048839;GO:0048839;GO:0060393;GO:0062023;GO:0070374;GO:1903672;	-	BMP-binding endothelial regulator [Source:MGISymbol;Acc:MGI:1920480]
MGP_C57BL6NJ_G0022455	24.4651	4.89524	44.035	8.99548	3.1692	0.00711345	0.251065	15	81778851	81793364	-	2785	Il2rb	GO:0004896;GO:0004911;GO:0005886;GO:0009897;GO:0009897;GO:0009986;GO:0009986;GO:0016020;GO:0016020;GO:0016020;GO:0016021;GO:0019221;GO:0019976;GO:0019976;GO:0030101;GO:0038110;GO:0043066;	K05069	interleukin 2 receptor, beta chain [Source:MGISymbol;Acc:MGI:96550]
MGP_C57BL6NJ_G0028069	40.3994	70.8771	9.92165	0.139984	-2.83667	0.00714838	0.251234	3	102981117	103012533	-	2393	-	-	K00058	-
MGP_C57BL6NJ_G0030966	79.1231	25.2534	132.993	5.26633	2.3968	0.00715152	0.251234	6	28295454	28321008	+	5195	Tspan33	GO:0005886;GO:0005886;GO:0005887;GO:0007166;GO:0009986;GO:0009986;GO:0016020;GO:0016021;GO:0016021;GO:0019899;GO:0019899;GO:0019899;GO:0051604;GO:0051604;GO:0051604;GO:0072659;GO:0072659;GO:0072659;GO:0097197;GO:0097197;	K17346	tetraspanin 33 [Source:MGI Symbol;Acc:MGI:1919012]"
MGP_C57BL6NJ_G0024329	1073.58	467.15	1680	3.59627	1.8465	0.0071926	0.252091	17	60255404	60282819	+	3876	-	-	K10638	-
MGP_C57BL6NJ_G0034457	867.052	346.771	1387.33	4.00072	2.00026	0.00723389	0.252951	8	99392722	99451285	+	7821	Nlrc5	GO:0000166;GO:0000978;GO:0000979;GO:0002376;GO:0005524;GO:0005634;GO:0005634;GO:0005634;GO:0005737;GO:0005737;GO:0005813;GO:0005829;GO:0005829;GO:0009617;GO:0032088;GO:0032088;GO:0035556;GO:0043549;GO:0045087;GO:0045087;GO:0045345;GO:0045345;GO:0045944;GO:0045944;GO:0051607;GO:0060335;GO:0060335;GO:0060339;GO:0060339;GO:0060339;GO:0060340;GO:0060340;	K22615	NLR family, CARD domain containing 5 [Source:MGISymbol;Acc:MGI:3612191]
MGP_C57BL6NJ_G0026027	1311.68	2422.87	200.497	0.0827516	-3.59507	0.00725062	0.252951	2	31948786	31984890	+	6066	Fam102a	-	-	family with sequence similarity 102, member A[Source:MGI Symbol;Acc:MGI:2138935]
MGP_C57BL6NJ_G0026158	14.9861	29.9722	0	0	-Inf	0.00735459	0.255987	2	55447759	56200475	+	7864	Galnt13	GO:0000139;GO:0004653;GO:0004653;GO:0005794;GO:0005794;GO:0006486;GO:0006493;GO:0016020;GO:0016021;GO:0016740;GO:0016757;GO:0018242;GO:0018243;GO:0030246;GO:0046872;GO:0004653;GO:0006493;	K00710	UDP-N-acetyl-alpha-D-galactosamine:polypeptide N-acetylgalactosaminyltransferase 13 [Source:MGISymbol;Acc:MGI:2139447]
MGP_C57BL6NJ_G0036664	236.448	379.287	93.6079	0.2468	-2.01859	0.00737767	0.256195	X	152713476	152721611	-	2989	Maged2	GO:0003674;GO:0005634;GO:0005730;GO:0005829;GO:0007565;GO:0016020;GO:0070294;	-	melanoma antigen, family D, 2 [Source:MGISymbol;Acc:MGI:1933391]
MGP_C57BL6NJ_G0036654	95.6959	159.9	31.4916	0.196945	-2.34413	0.00739448	0.256195	X	147044752	147105345	-	8408	Amot	GO:0001570;GO:0001570;GO:0001701;GO:0001701;GO:0001702;GO:0001702;GO:0001725;GO:0001726;GO:0003365;GO:0003365;GO:0003365;GO:0004872;GO:0005515;GO:0005634;GO:0005737;GO:0005884;GO:0005884;GO:0005923;GO:0005923;GO:0005923;GO:0005923;GO:0006935;GO:0006935;GO:0008180;GO:0009897;GO:0009986;GO:0016021;GO:0016525;GO:0030027;GO:0030027;GO:0030027;GO:0030027;GO:0030036;GO:0030036;GO:0030036;GO:0030054;GO:…	K16819	angiomotin [Source:MGI Symbol;Acc:MGI:108440]"
MGP_C57BL6NJ_G0019197	387.398	167.322	607.474	3.63058	1.8602	0.0074471	0.257397	11	83716388	83774504	+	7532	Atad5	GO:0000166;GO:0002377;GO:0002377;GO:0003674;GO:0003677;GO:0005515;GO:0005524;GO:0005524;GO:0005575;GO:0005634;GO:0005634;GO:0005634;GO:0005634;GO:0006974;GO:0006974;GO:0006974;GO:0008630;GO:0008630;GO:0030890;GO:0030890;GO:0031391;GO:0031391;GO:0033260;GO:0033260;GO:0042100;GO:0042100;GO:0042770;GO:0042770;GO:0042771;GO:0042771;GO:0045190;GO:0045190;GO:0045740;GO:0045740;GO:0048304;GO:0048304;GO:…	-	ATPase family, AAA domain containing 5 [Source:MGISymbol;Acc:MGI:2442925]
MGP_C57BL6NJ_G0034430	9.06674	18.1335	0	0	-Inf	0.00746487	0.257397	8	97089255	97092915	+	2403	Irx5	GO:0002027;GO:0002027;GO:0003677;GO:0003677;GO:0005634;GO:0005634;GO:0006351;GO:0006355;GO:0007601;GO:0010468;GO:0010468;GO:0042551;GO:0042551;GO:0043565;GO:0048468;GO:0048468;GO:0050896;GO:0060040;GO:0060040;	-	Iroquois related homeobox 5 (Drosophila)[Source:MGI Symbol;Acc:MGI:1859086]
MGP_C57BL6NJ_G0027679	25.533	49.763	1.30298	0.0261838	-5.25518	0.00748029	0.257397	3	63792378	63881831	-	4288	Gpr149	GO:0001546;GO:0001546;GO:0001547;GO:0001547;GO:0004871;GO:0004930;GO:0004930;GO:0004930;GO:0005886;GO:0005887;GO:0007165;GO:0007186;GO:0007186;GO:0007187;GO:0007218;GO:0007268;GO:0016020;GO:0016021;GO:0016021;GO:0030273;GO:0042923;GO:0043005;GO:0060280;GO:0060280;	K08433	G protein-coupled receptor 149 [Source:MGISymbol;Acc:MGI:2443628]
MGP_C57BL6NJ_G0019229	441.834	189.989	693.679	3.65115	1.86835	0.00752659	0.257868	11	86793831	86821206	-	4727	Slfn9	GO:0000049;GO:0000166;GO:0003674;GO:0004518;GO:0004519;GO:0004521;GO:0005524;GO:0005524;GO:0005622;GO:0005634;GO:0005634;GO:0005737;GO:0005737;GO:0008150;GO:0008270;GO:0016787;GO:0046872;GO:0051607;GO:0090305;GO:0090502;	-	schlafen 9 [Source:MGI Symbol;Acc:MGI:2445121]"
MGP_C57BL6NJ_G0026734	309.815	495.859	123.771	0.249608	-2.00226	0.00753769	0.257868	2	124952925	125056382	-	3899	Gpr176	GO:0004871;GO:0004930;GO:0004930;GO:0004930;GO:0005886;GO:0005886;GO:0007165;GO:0007186;GO:0007186;GO:0007186;GO:0007193;GO:0007193;GO:0016020;GO:0016021;GO:0016021;GO:0030818;GO:0030818;GO:0048511;GO:0048512;GO:0048512;	K08442	G protein-coupled receptor 176 [Source:MGISymbol;Acc:MGI:2685858]
MGP_C57BL6NJ_G0021434	2757.9	4364.36	1151.43	0.263827	-1.92234	0.00754519	0.257868	14	14210632	14313535	+	5229	Vcl	GO:0001725;GO:0002009;GO:0002102;GO:0002102;GO:0002162;GO:0003779;GO:0003779;GO:0005198;GO:0005515;GO:0005515;GO:0005515;GO:0005737;GO:0005737;GO:0005856;GO:0005884;GO:0005886;GO:0005886;GO:0005886;GO:0005903;GO:0005911;GO:0005911;GO:0005912;GO:0005912;GO:0005912;GO:0005913;GO:0005915;GO:0005916;GO:0005916;GO:0005925;GO:0005925;GO:0005925;GO:0007155;GO:0007155;GO:0007155;GO:0007155;GO:0014704;GO:…	K05700	vinculin [Source:MGI Symbol;Acc:MGI:98927]"
MGP_C57BL6NJ_G0020939	328.816	526.355	131.276	0.249406	-2.00343	0.00766662	0.261427	13	52661152	52662942	+	1173	Gadd45g	GO:0005634;GO:0006950;GO:0051726;	K04402	growth arrest and DNA-damage-inducible 45 gamma[Source:MGI Symbol;Acc:MGI:1346325]
MGP_C57BL6NJ_G0024598	11.2464	22.0666	0.426248	0.0193164	-5.69403	0.00769532	0.261814	18	21295652	21650777	-	5489	Nol4	GO:0005634;GO:0005730;GO:0005730;GO:0008150;	-	nucleolar protein 4 [Source:MGISymbol;Acc:MGI:2441684]
MGP_C57BL6NJ_G0035550	26.0216	47.3017	4.7414	0.100238	-3.31851	0.00775814	0.263358	9	80769833	80787193	+	957	Gsta4	GO:0004364;GO:0004364;GO:0004364;GO:0005737;GO:0005737;GO:0005739;GO:0006749;GO:0008144;GO:0008152;GO:0016740;GO:0043295;	K00799	glutathione S-transferase, alpha 4 [Source:MGISymbol;Acc:MGI:1309515]
MGP_C57BL6NJ_G0024817	233.103	95.8011	370.406	3.8664	1.95099	0.00780362	0.264308	18	46651400	46686822	-	2801	Ccdc112	-	-	coiled-coil domain containing 112 [Source:MGISymbol;Acc:MGI:1918800]
MGP_C57BL6NJ_G0024108	251.473	98.2382	404.708	4.11966	2.04253	0.00782365	0.264394	17	39286750	39291014	+	1438	H2-M3	GO:0001916;GO:0001916;GO:0001916;GO:0002237;GO:0002237;GO:0002287;GO:0002287;GO:0002474;GO:0002476;GO:0002476;GO:0002476;GO:0002477;GO:0002477;GO:0002481;GO:0002481;GO:0002645;GO:0002666;GO:0002767;GO:0005102;GO:0005102;GO:0005886;GO:0006955;GO:0009897;GO:0009897;GO:0016020;GO:0016020;GO:0016021;GO:0032398;GO:0032398;GO:0032729;GO:0032729;GO:0032735;GO:0042130;GO:0042605;GO:0042605;GO:0042605;GO:…	K06751	histocompatibility 2, M region locus 3 [Source:MGISymbol;Acc:MGI:95915]
MGP_C57BL6NJ_G0017334	50.2126	86.2143	14.2109	0.164833	-2.60092	0.00786661	0.265252	1	204267415	204304441	-	4314	Vash2	GO:0000768;GO:0001938;GO:0003674;GO:0005576;GO:0005737;GO:0005737;GO:0005737;GO:0045026;GO:0045765;GO:0045766;GO:0060674;GO:0060711;GO:0060716;GO:0140253;GO:0000768;GO:0045766;GO:0060674;GO:0060711;GO:0060716;	-	vasohibin 2 [Source:MGI Symbol;Acc:MGI:2444826]"
MGP_C57BL6NJ_G0018120	161.214	275.27	47.1578	0.171315	-2.54528	0.0078925	0.265527	10	117861567	117863986	+	2265	Phlda1	GO:0005515;GO:0005634;GO:0005634;GO:0005730;GO:0005730;GO:0005737;GO:0006915;GO:0031410;GO:0043065;GO:0045210;GO:0045210;	-	pleckstrin homology like domain, family A, member 1[Source:MGI Symbol;Acc:MGI:1096880]
MGP_C57BL6NJ_G0029573	181.564	302.656	60.471	0.199801	-2.32336	0.00790992	0.265527	4	158987697	159063569	+	4662	Clstn1	GO:0000139;GO:0001540;GO:0001558;GO:0005509;GO:0005509;GO:0005515;GO:0005576;GO:0005615;GO:0005634;GO:0005783;GO:0005789;GO:0005794;GO:0005886;GO:0006874;GO:0007155;GO:0007156;GO:0007268;GO:0009986;GO:0009986;GO:0014069;GO:0016020;GO:0016020;GO:0016021;GO:0016021;GO:0019894;GO:0030054;GO:0042988;GO:0042995;GO:0045202;GO:0045211;GO:0045211;GO:0050806;GO:0050806;GO:0051965;GO:0051965;GO:0070062;GO:…	K22659	calsyntenin 1 [Source:MGI Symbol;Acc:MGI:1929895]"
MGP_C57BL6NJ_G0035722	42.7564	80.3978	5.11497	0.0636207	-3.97436	0.00795911	0.266586	9	111223240	111228578	-	2966	Acy1	GO:0004046;GO:0005737;GO:0006508;GO:0006520;GO:0008152;GO:0008237;GO:0016787;	K14677	aminoacylase 1 [Source:MGI Symbol;Acc:MGI:87913]"
MGP_C57BL6NJ_G0029154	30.7246	54.9682	6.48097	0.117904	-3.08432	0.00800158	0.267361	4	129206380	129213209	+	4038	Mycl	GO:0003677;GO:0003700;GO:0005515;GO:0005634;GO:0005634;GO:0005634;GO:0006355;GO:0045607;GO:0046983;GO:0045607;	-	v-myc avian myelocytomatosis viral oncogene lungcarcinoma derived [Source:MGI Symbol;Acc:MGI:96799]
MGP_C57BL6NJ_G0022919	391.003	622.003	160.003	0.257238	-1.95882	0.00801764	0.267361	16	7217973	7253123	-	3356	Emp2	GO:0000139;GO:0001765;GO:0001765;GO:0001913;GO:0001913;GO:0001952;GO:0001952;GO:0001952;GO:0001954;GO:0003093;GO:0003093;GO:0005178;GO:0005178;GO:0005178;GO:0005634;GO:0005634;GO:0005737;GO:0005737;GO:0005737;GO:0005737;GO:0005794;GO:0005794;GO:0005829;GO:0005886;GO:0005886;GO:0005886;GO:0005886;GO:0007015;GO:0007015;GO:0007155;GO:0007155;GO:0007155;GO:0007160;GO:0007160;GO:0007566;GO:0007566;GO:…	-	epithelial membrane protein 2 [Source:MGISymbol;Acc:MGI:1098726]
MGP_C57BL6NJ_G0019278	472.828	207.838	737.818	3.54997	1.82781	0.00811014	0.26985	11	90256549	90403644	-	7454	Brip1	GO:0000166;GO:0003676;GO:0003677;GO:0003682;GO:0004003;GO:0004003;GO:0004386;GO:0005524;GO:0005524;GO:0005634;GO:0005634;GO:0005634;GO:0005737;GO:0005737;GO:0006139;GO:0006281;GO:0006289;GO:0006357;GO:0006974;GO:0007129;GO:0007129;GO:0007283;GO:0007283;GO:0007284;GO:0007284;GO:0007286;GO:0007286;GO:0008026;GO:0008285;GO:0008584;GO:0008584;GO:0010629;GO:0010705;GO:0010705;GO:0016787;GO:0016818;GO:…	K15362	BRCA1 interacting protein C-terminal helicase 1[Source:MGI Symbol;Acc:MGI:2442836]
MGP_C57BL6NJ_G0018367	8.86786	17.7357	0	0	-Inf	0.00820215	0.271937	11	1099097	1106183	-	1738	Mtfp1	GO:0000266;GO:0000266;GO:0000266;GO:0003674;GO:0005739;GO:0005739;GO:0005739;GO:0005739;GO:0005743;GO:0005743;GO:0006915;GO:0007006;GO:0016020;GO:0016021;	K17981	mitochondrial fission process 1 [Source:MGISymbol;Acc:MGI:1916686]
MGP_C57BL6NJ_G0016515	129.144	50.0929	208.196	4.15619	2.05526	0.00823372	0.271937	1	74190212	74262234	-	5650	Bard1	GO:0003723;GO:0004842;GO:0004842;GO:0005634;GO:0005634;GO:0005634;GO:0005737;GO:0005737;GO:0006281;GO:0006974;GO:0016567;GO:0016567;GO:0016607;GO:0016740;GO:0031436;GO:0031436;GO:0031436;GO:0036464;GO:0042325;GO:0042325;GO:0042803;GO:0042803;GO:0043065;GO:0043065;GO:0043065;GO:0043066;GO:0043066;GO:0046826;GO:0046826;GO:0046872;GO:0046982;GO:0046982;GO:0070531;GO:0085020;GO:0085020;	K10683	BRCA1 associated RING domain 1 [Source:MGISymbol;Acc:MGI:1328361]
MGP_C57BL6NJ_G0018353	41.474	10.5005	72.4476	6.89946	2.78648	0.00826044	0.271937	11	437886	448895	-	5235	-	-	K01106	-
MGP_C57BL6NJ_G0024676	13.0697	25.2788	0.860575	0.0340433	-4.87648	0.0082861	0.271937	18	35262469	35271930	-	1680	Ecscr	GO:0001525;GO:0005654;GO:0005737;GO:0005829;GO:0005829;GO:0005829;GO:0005886;GO:0005886;GO:0005886;GO:0005886;GO:0006915;GO:0006935;GO:0007275;GO:0016020;GO:0016021;GO:0016525;GO:0016525;GO:0016525;GO:0030154;GO:0043231;GO:1901800;GO:1901800;GO:2000353;GO:2000353;	-	endothelial cell surface expressed chemotaxis andapoptosis regulator [Source:MGI Symbol;Acc:MGI:1915795]
MGP_C57BL6NJ_G0023492	15.1852	30.3704	0	0	-Inf	0.00829361	0.271937	16	99607244	99649496	+	6437	Kcnj15	GO:0005242;GO:0005242;GO:0005242;GO:0005244;GO:0005267;GO:0005515;GO:0005886;GO:0005887;GO:0006810;GO:0006811;GO:0006813;GO:0006813;GO:0006813;GO:0010107;GO:0016020;GO:0016020;GO:0016021;GO:0016021;GO:0016021;GO:0034220;GO:0034765;GO:0034765;GO:0071805;GO:0098655;	K05008	potassium inwardly-rectifying channel, subfamily J,member 15 [Source:MGI Symbol;Acc:MGI:1310000]
MGP_C57BL6NJ_G0020490	123.24	235.221	11.2586	0.0478639	-4.38492	0.00831131	0.271937	12	113889055	114080552	+	7282	Eml1	GO:0000226;GO:0002244;GO:0005829;GO:0007052;GO:0007405;GO:0007420;GO:0008017;GO:0097431;GO:1990023;	K18595	echinoderm microtubule associated protein like 1[Source:MGI Symbol;Acc:MGI:1915769]
MGP_C57BL6NJ_G0031866	55.9575	15.7871	96.1278	6.089	2.60621	0.00831221	0.271937	6	144919140	144972306	-	2633	Plbd1	GO:0006629;GO:0016042;GO:0016787;	-	phospholipase B domain containing 1 [Source:MGISymbol;Acc:MGI:1914107]
MGP_C57BL6NJ_G0029080	21.3403	39.2301	3.45038	0.0879523	-3.50713	0.00831688	0.271937	4	123451912	123466142	-	5028	B4galt2	GO:0003831;GO:0003945;GO:0004461;GO:0005654;GO:0005794;GO:0005794;GO:0005975;GO:0006486;GO:0007420;GO:0007613;GO:0007626;GO:0008542;GO:0016020;GO:0016021;GO:0016740;GO:0016757;GO:0016757;GO:0021680;GO:0032580;GO:0043231;GO:0046872;GO:0007420;GO:0007613;GO:0007626;GO:0008542;GO:0021680;	K07967	UDP-Gal:betaGlcNAc beta 1,4- galactosyltransferase,polypeptide 2 [Source:MGI Symbol;Acc:MGI:1858493]
MGP_C57BL6NJ_G0027664	54.0254	14.73	93.3208	6.33544	2.66345	0.00835354	0.272545	3	60225236	60228226	-	2528	P2ry13	GO:0004871;GO:0004930;GO:0004930;GO:0005783;GO:0005783;GO:0005886;GO:0005887;GO:0007165;GO:0007186;GO:0007186;GO:0007186;GO:0007194;GO:0016020;GO:0016021;GO:0016021;GO:0035589;GO:0045028;GO:0045028;GO:0045028;GO:0071407;GO:0071407;	K08388	purinergic receptor P2Y, G-protein coupled 13[Source:MGI Symbol;Acc:MGI:1921441]
MGP_C57BL6NJ_G0031284	160.138	61.9729	258.304	4.16801	2.05936	0.00839911	0.273442	6	68887565	68980360	-	3780	Il12rb2	GO:0004896;GO:0004896;GO:0005515;GO:0005886;GO:0009897;GO:0009897;GO:0016020;GO:0016020;GO:0016021;GO:0018108;GO:0019221;GO:0019901;GO:0019955;GO:0032496;GO:0032609;GO:0032729;GO:0034097;GO:0043235;GO:0009897;GO:0018108;GO:0019901;GO:0032496;GO:0032609;GO:0034097;	-	interleukin 12 receptor, beta 2 [Source:MGISymbol;Acc:MGI:1270861]
MGP_C57BL6NJ_G0032279	9.23291	18.4658	0	0	-Inf	0.00852431	0.27642	7	23583955	23592623	+	1308	Zfp428	GO:0003676;GO:0008150;GO:0046872;	-	zinc finger protein 428 [Source:MGISymbol;Acc:MGI:1916463]
MGP_C57BL6NJ_G0035571	241.776	388.763	94.7897	0.243824	-2.03609	0.00853805	0.27642	9	82916974	83072712	+	12078	Myo6	GO:0000166;GO:0003774;GO:0003774;GO:0003777;GO:0003779;GO:0005524;GO:0005524;GO:0007018;GO:0008017;GO:0016459;GO:0016459;GO:0051015;	K10358	myosin VI [Source:MGI Symbol;Acc:MGI:104785]"
MGP_C57BL6NJ_G0029299	3898.79	1649.43	6148.14	3.72744	1.89818	0.00854549	0.27642	4	139603110	139623059	+	3601	Ptafr	GO:0001530;GO:0001530;GO:0001816;GO:0001816;GO:0001875;GO:0001875;GO:0002693;GO:0004871;GO:0004930;GO:0004930;GO:0004992;GO:0004992;GO:0005543;GO:0005622;GO:0005886;GO:0005886;GO:0005887;GO:0006357;GO:0006935;GO:0006935;GO:0006954;GO:0006954;GO:0007165;GO:0007186;GO:0007186;GO:0007186;GO:0007186;GO:0007567;GO:0010863;GO:0016020;GO:0016020;GO:0016021;GO:0016021;GO:0031663;GO:0032496;GO:0032496;GO:…	K04279	platelet-activating factor receptor [Source:MGISymbol;Acc:MGI:106066]
MGP_C57BL6NJ_G0024768	83.7466	153.637	13.8562	0.0901876	-3.47093	0.00860869	0.277869	18	37926839	37952483	-	8293	Pcdh1	GO:0005509;GO:0005515;GO:0005634;GO:0005730;GO:0005886;GO:0005887;GO:0005887;GO:0005911;GO:0007155;GO:0007155;GO:0007155;GO:0007156;GO:0007156;GO:0016020;GO:0016020;GO:0016021;GO:0016339;GO:0030054;GO:0043231;	K16498	protocadherin 1 [Source:MGI Symbol;Acc:MGI:104692]"
MGP_C57BL6NJ_G0017081	9.66644	0.312998	19.0199	60.7668	5.92521	0.00862749	0.277882	1	175178193	175200392	+	5911	Sell	GO:0002020;GO:0005509;GO:0005509;GO:0005515;GO:0005886;GO:0005886;GO:0005887;GO:0005887;GO:0007155;GO:0007155;GO:0009897;GO:0009986;GO:0016020;GO:0016020;GO:0016021;GO:0016339;GO:0016339;GO:0030246;GO:0033198;GO:0042981;GO:0046872;GO:0050839;GO:0050900;GO:0050901;GO:0050901;GO:0051861;GO:0070492;GO:0070492;GO:0090023;GO:0005886;GO:0009897;GO:0009986;GO:0033198;GO:0050839;	-	selectin, lymphocyte [Source:MGISymbol;Acc:MGI:98279]
MGP_C57BL6NJ_G0031177	8.74824	17.4965	0	0	-Inf	0.00872045	0.280168	6	52542036	52590780	-	6014	Hoxa3	GO:0000978;GO:0001974;GO:0001974;GO:0003677;GO:0003677;GO:0003700;GO:0003700;GO:0003700;GO:0003700;GO:0005634;GO:0005634;GO:0005654;GO:0005654;GO:0006351;GO:0006355;GO:0006355;GO:0006355;GO:0006816;GO:0006816;GO:0007275;GO:0008284;GO:0008284;GO:0009887;GO:0009887;GO:0009952;GO:0009952;GO:0009952;GO:0010159;GO:0010159;GO:0010467;GO:0010467;GO:0010960;GO:0010960;GO:0021615;GO:0021615;GO:0030282;GO:…	K09303	homeobox A3 [Source:MGI Symbol;Acc:MGI:96175]"
MGP_C57BL6NJ_G0017438	220.153	352.932	87.3741	0.247566	-2.01411	0.00873553	0.280168	10	16675735	16840109	-	8216	Arfgef3	GO:0005085;GO:0005086;GO:0010923;GO:0010923;GO:0016020;GO:0016021;GO:0030133;GO:0030658;GO:0031410;GO:0032012;	K17572	ARFGEF family member 3 [Source:MGISymbol;Acc:MGI:106387]
MGP_C57BL6NJ_G0034997	21.7593	43.5187	0	0	-Inf	0.0087649	0.280514	9	25479983	25537868	-	2539	Jam3	GO:0001525;GO:0001525;GO:0001525;GO:0001780;GO:0001780;GO:0002250;GO:0002250;GO:0002318;GO:0002318;GO:0002523;GO:0002523;GO:0005178;GO:0005178;GO:0005515;GO:0005515;GO:0005576;GO:0005615;GO:0005615;GO:0005794;GO:0005886;GO:0005887;GO:0005911;GO:0005911;GO:0005923;GO:0005923;GO:0005923;GO:0007155;GO:0007155;GO:0007155;GO:0007160;GO:0007160;GO:0007283;GO:0007283;GO:0007286;GO:0007286;GO:0009986;GO:…	K06785	junction adhesion molecule 3 [Source:MGISymbol;Acc:MGI:1933825]
MGP_C57BL6NJ_G0024015	23.5864	42.8619	4.31096	0.100578	-3.31361	0.00879346	0.280833	17	36535892	36538857	+	1498	Ddah2	GO:0000052;GO:0000052;GO:0000052;GO:0000052;GO:0005737;GO:0005739;GO:0005815;GO:0005829;GO:0006525;GO:0006525;GO:0006527;GO:0006527;GO:0016403;GO:0016403;GO:0016403;GO:0016403;GO:0016597;GO:0016597;GO:0016787;GO:0045429;GO:0045429;GO:0070062;	K01482	dimethylarginine dimethylaminohydrolase 2[Source:MGI Symbol;Acc:MGI:1859016]
MGP_C57BL6NJ_G0019915	23.0657	45.697	0.434328	0.00950452	-6.71717	0.00885348	0.282001	11	128992179	128994678	+	1293	Rac3	GO:0000166;GO:0000902;GO:0003924;GO:0003924;GO:0003924;GO:0003924;GO:0005515;GO:0005515;GO:0005525;GO:0005525;GO:0005525;GO:0005622;GO:0005737;GO:0005737;GO:0005829;GO:0005856;GO:0005856;GO:0005886;GO:0005886;GO:0007015;GO:0007264;GO:0007266;GO:0012505;GO:0012505;GO:0014041;GO:0014041;GO:0016020;GO:0016477;GO:0019901;GO:0021894;GO:0021894;GO:0022604;GO:0022604;GO:0030027;GO:0030031;GO:0030031;GO:…	K07861	RAS-related C3 botulinum substrate 3 [Source:MGISymbol;Acc:MGI:2180784]
MGP_C57BL6NJ_G0018442	12.9835	25.1065	0.860575	0.034277	-4.86661	0.0089161	0.282001	11	9869428	10106424	-	8142	Cobl	GO:0000578;GO:0001726;GO:0001726;GO:0001757;GO:0001843;GO:0001889;GO:0003779;GO:0003779;GO:0003785;GO:0005515;GO:0005515;GO:0005737;GO:0005856;GO:0005884;GO:0005886;GO:0005886;GO:0005938;GO:0005938;GO:0016020;GO:0016020;GO:0030041;GO:0030424;GO:0030425;GO:0030903;GO:0033504;GO:0042995;GO:0043025;GO:0044294;GO:0044295;GO:0048471;GO:0048565;GO:0048669;GO:0051639;GO:0051764;GO:1900006;GO:1900029;GO:…	-	cordon-bleu WH2 repeat [Source:MGISymbol;Acc:MGI:105056]
MGP_C57BL6NJ_G0029014	26.4206	51.9887	0.852495	0.0163977	-5.93036	0.00892457	0.282001	4	119606868	119833208	+	6621	Trabd2b	GO:0004222;GO:0004222;GO:0004222;GO:0005886;GO:0005887;GO:0005887;GO:0005887;GO:0006508;GO:0006508;GO:0008233;GO:0008237;GO:0016020;GO:0016020;GO:0016021;GO:0016055;GO:0016787;GO:0017147;GO:0017147;GO:0017147;GO:0030178;GO:0030178;GO:0030178;GO:0031301;GO:0031301;GO:0031301;GO:0032461;GO:0046872;GO:0070062;GO:1904808;	-	TraB domain containing 2B [Source:MGISymbol;Acc:MGI:3650152]
MGP_C57BL6NJ_G0024302	470.093	203.225	736.96	3.62632	1.85851	0.00892675	0.282001	17	59538940	59597613	-	3499	Pot1b	GO:0000723;GO:0000783;GO:0000783;GO:0000783;GO:0000784;GO:0000784;GO:0000784;GO:0000784;GO:0001558;GO:0001558;GO:0003677;GO:0005515;GO:0007569;GO:0007569;GO:0010521;GO:0016233;GO:0016233;GO:0016233;GO:0017137;GO:0017137;GO:0031848;GO:0031848;GO:0032210;GO:0042162;GO:0042162;GO:0043047;GO:0043047;GO:0043047;GO:0043087;GO:0043087;GO:0043247;GO:0043247;GO:0048239;GO:0048239;GO:0050764;GO:0050764;GO:…	K11109	protection of telomeres 1B [Source:MGISymbol;Acc:MGI:1920086]
MGP_C57BL6NJ_G0020286	27.8903	51.4697	4.31096	0.0837572	-3.57764	0.00895061	0.282001	12	83833242	84016704	+	3496	Smoc1	GO:0005509;GO:0005578;GO:0007165;GO:0050840;	-	SPARC related modular calcium binding 1[Source:MGI Symbol;Acc:MGI:1929878]
MGP_C57BL6NJ_G0027817	3089.2	4800.34	1378.06	0.287075	-1.8005	0.00896289	0.282001	3	91942922	91977310	-	5838	Lmna	GO:0005634;GO:0005635;GO:0005638;GO:0006606;GO:0006997;GO:0006998;GO:0010628;GO:0030334;GO:0030951;GO:0031647;GO:0031965;GO:0034504;GO:0035105;GO:0055015;GO:0072201;GO:0090201;GO:1900114;GO:1900180;GO:1903243;GO:2001237;	K12641	lamin A [Source:MGI Symbol;Acc:MGI:96794]"
MGP_C57BL6NJ_G0029873	8.6135	17.227	0	0	-Inf	0.00897454	0.282001	5	33244264	33269521	-	2947	Spon2	GO:0001530;GO:0002448;GO:0003823;GO:0005578;GO:0005615;GO:0008228;GO:0031012;GO:0032496;GO:0032755;GO:0032760;GO:0042742;GO:0043152;GO:0045087;GO:0050832;GO:0051607;GO:0060907;GO:0071222;	-	spondin 2, extracellular matrix protein [Source:MGISymbol;Acc:MGI:1923724]
MGP_C57BL6NJ_G0026752	87.9702	31.4017	144.539	4.6029	2.20254	0.00897939	0.282001	2	125847502	125883005	+	6649	Rad51	GO:0000150;GO:0000150;GO:0000166;GO:0000166;GO:0000228;GO:0000228;GO:0000400;GO:0000722;GO:0000724;GO:0000724;GO:0000730;GO:0000730;GO:0000730;GO:0000784;GO:0000784;GO:0000785;GO:0000790;GO:0000793;GO:0000794;GO:0000794;GO:0000795;GO:0000800;GO:0001932;GO:0003677;GO:0003677;GO:0003682;GO:0003690;GO:0003690;GO:0003690;GO:0003690;GO:0003697;GO:0003697;GO:0003697;GO:0004520;GO:0005515;GO:0005515;GO:…	-	RAD51 recombinase [Source:MGISymbol;Acc:MGI:97890]
MGP_C57BL6NJ_G0026020	70.1243	126.35	13.8985	0.11	-3.18443	0.00905589	0.283542	2	31691827	31744996	-	5249	Dnm1	GO:0000166;GO:0000266;GO:0001917;GO:0002031;GO:0003374;GO:0003723;GO:0003924;GO:0003924;GO:0005515;GO:0005515;GO:0005515;GO:0005525;GO:0005525;GO:0005634;GO:0005654;GO:0005737;GO:0005737;GO:0005737;GO:0005794;GO:0005856;GO:0005874;GO:0005886;GO:0005886;GO:0006897;GO:0006897;GO:0006898;GO:0007032;GO:0007605;GO:0008017;GO:0008021;GO:0008022;GO:0008344;GO:0014069;GO:0016020;GO:0016185;GO:0016185;GO:…	K01528	dynamin 1 [Source:MGI Symbol;Acc:MGI:107384]"
MGP_C57BL6NJ_G0022265	127.259	244.118	10.3986	0.0425967	-4.55311	0.00906598	0.283542	15	57929060	57965651	-	4231	Has2	GO:0001570;GO:0001570;GO:0005737;GO:0005737;GO:0005887;GO:0005887;GO:0005887;GO:0007155;GO:0008284;GO:0010838;GO:0014911;GO:0016020;GO:0016021;GO:0016740;GO:0016757;GO:0030212;GO:0030212;GO:0030213;GO:0030213;GO:0030213;GO:0030213;GO:0030213;GO:0030335;GO:0035810;GO:0036120;GO:0036302;GO:0036302;GO:0042802;GO:0045226;GO:0045226;GO:0045226;GO:0050501;GO:0050501;GO:0050501;GO:0050501;GO:0050501;GO:…	K00752	hyaluronan synthase 2 [Source:MGISymbol;Acc:MGI:107821]
MGP_C57BL6NJ_G0020462	86.6269	168.488	4.76596	0.0282867	-5.14373	0.00909859	0.283648	12	109509112	109516712	+	2064	Serpina3n	GO:0005615;	K04525	serine (or cysteine) peptidase inhibitor, clade A,member 3N [Source:MGI Symbol;Acc:MGI:105045]
MGP_C57BL6NJ_G0020544	500.53	830.115	170.945	0.205929	-2.27978	0.0091231	0.283648	12	118757063	118783514	+	6624	Cep170b	GO:0003674;GO:0005575;GO:0005737;GO:0005856;GO:0005874;GO:0008150;	K16463	centrosomal protein 170B [Source:MGISymbol;Acc:MGI:2145043]
MGP_C57BL6NJ_G0032874	206.041	87.613	324.469	3.70343	1.88886	0.0091257	0.283648	7	84762183	84802404	+	10007	Ticrr	GO:0000075;GO:0001731;GO:0003682;GO:0003682;GO:0005634;GO:0005634;GO:0005634;GO:0005654;GO:0006260;GO:0006260;GO:0006281;GO:0006974;GO:0007049;GO:0007093;GO:0010212;GO:0010212;GO:0030174;GO:0030174;GO:0033314;GO:0033314;	-	TOPBP1-interacting checkpoint and replicationregulator [Source:MGI Symbol;Acc:MGI:1924261]
MGP_C57BL6NJ_G0021334	7.12746	0	14.2549	Inf	Inf	0.00917436	0.284238	13	119139748	119146900	-	878	Gzma	GO:0004252;GO:0004252;GO:0004252;GO:0005576;GO:0005634;GO:0005634;GO:0006508;GO:0006508;GO:0006915;GO:0008233;GO:0008236;GO:0008236;GO:0008236;GO:0009617;GO:0009617;GO:0016787;GO:0019835;GO:0032078;GO:0032078;GO:0042803;GO:0042803;GO:0043065;GO:0043065;GO:0043065;GO:0043392;GO:0043392;GO:0051354;GO:0051354;GO:0051354;GO:0051603;GO:0051603;	K01352	granzyme A [Source:MGI Symbol;Acc:MGI:109266]"
MGP_C57BL6NJ_G0029832	32.7602	57.7335	7.78685	0.134876	-2.8903	0.00918538	0.284238	5	30672400	30684848	-	2082	Cgref1	GO:0005509;	-	cell growth regulator with EF hand domain 1[Source:MGI Symbol;Acc:MGI:1915817]
MGP_C57BL6NJ_G0034051	183.381	295.65	71.1133	0.240532	-2.0557	0.00920114	0.284238	8	41202746	41265100	+	9205	Slc7a2	GO:0000064;GO:0000064;GO:0002537;GO:0003333;GO:0005289;GO:0005292;GO:0005886;GO:0005886;GO:0006809;GO:0006810;GO:0006865;GO:0006865;GO:0015171;GO:0015181;GO:0015181;GO:0015189;GO:0015189;GO:0015809;GO:0016020;GO:0016020;GO:0016021;GO:0016021;GO:0016021;GO:0022857;GO:0030054;GO:0042116;GO:0043030;GO:0050727;GO:0055085;GO:0061459;GO:0097626;GO:0097627;GO:0097638;GO:0097638;GO:0097639;GO:0097640;GO:…	K13864	solute carrier family 7 (cationic amino acidtransporter, y+ system), member 2 [Source:MGISymbol;Acc:MGI:99828]
MGP_C57BL6NJ_G0021635	7.10597	0	14.2119	Inf	Inf	0.00923452	0.284555	14	46118573	46124322	+	3274	Tlr11	GO:0002224;GO:0002376;GO:0005515;GO:0005887;GO:0006954;GO:0006954;GO:0007165;GO:0009617;GO:0016020;GO:0016021;GO:0045087;	K14142	toll-like receptor 11 [Source:MGISymbol;Acc:MGI:3045226]
MGP_C57BL6NJ_G0019534	93.8332	180.723	6.94342	0.0384203	-4.70199	0.0093078	0.284555	11	106056636	106064493	-	1855	Krt19	GO:0005198;GO:0005198;GO:0005515;GO:0005882;GO:0005882;GO:0005886;GO:0007219;GO:0007219;GO:0008307;GO:0016010;GO:0016327;GO:0016327;GO:0030018;GO:0030018;GO:0042383;GO:0042383;GO:0043034;GO:0044877;GO:0045214;GO:0060706;GO:0060706;GO:0070062;GO:0071944;GO:1990357;GO:1990357;	K07604	keratin 19 [Source:MGI Symbol;Acc:MGI:96693]"
MGP_C57BL6NJ_G0021765	25.5651	4.55382	46.5764	10.228	3.35445	0.00933982	0.284555	14	52235047	52248522	-	3006	Tgm1	GO:0003810;GO:0018149;GO:0046872;	K05619	transglutaminase 1, K polypeptide [Source:MGISymbol;Acc:MGI:98730]
MGP_C57BL6NJ_G0017611	965.931	437.485	1494.38	3.41584	1.77224	0.00934388	0.284555	10	52204713	52215796	+	1731	-	-	-	-
MGP_C57BL6NJ_G0016393	1266.88	556.856	1976.9	3.55011	1.82787	0.00934965	0.284555	1	53127456	53139945	-	8140	Nabp1	GO:0000724;GO:0000724;GO:0000784;GO:0003677;GO:0003697;GO:0003697;GO:0003723;GO:0005634;GO:0005634;GO:0005654;GO:0005829;GO:0006281;GO:0006281;GO:0006974;GO:0006974;GO:0007093;GO:0007093;GO:0010212;GO:0010212;GO:0070876;GO:0070876;GO:0000784;GO:0003697;GO:0003723;GO:0005634;	-	nucleic acid binding protein 1 [Source:MGISymbol;Acc:MGI:1923258]
MGP_C57BL6NJ_G0030326	320.464	542.729	98.1984	0.180934	-2.46646	0.00935948	0.284555	5	117820856	118260782	+	12315	Ttc28	GO:0000922;GO:0005737;GO:0005813;GO:0005815;GO:0005819;GO:0005856;GO:0007049;GO:0007346;GO:0007346;GO:0019900;GO:0030496;GO:0030496;GO:0030496;GO:0051301;GO:0072686;GO:0072686;GO:0097431;GO:1990023;	-	tetratricopeptide repeat domain 28 [Source:MGISymbol;Acc:MGI:2140873]
MGP_C57BL6NJ_G0025077	22.2184	40.5619	3.87501	0.0955333	-3.38785	0.00936212	0.284555	19	1342618	1357752	-	1714	Rhod	GO:0000166;GO:0003924;GO:0003924;GO:0005525;GO:0005525;GO:0005525;GO:0005525;GO:0005525;GO:0005622;GO:0005737;GO:0005768;GO:0005769;GO:0005886;GO:0005938;GO:0006605;GO:0006605;GO:0007015;GO:0007264;GO:0007266;GO:0008360;GO:0016020;GO:0016477;GO:0019901;GO:0019901;GO:0019901;GO:0030032;GO:0030334;GO:0030335;GO:0030950;GO:0032153;GO:0032956;GO:0043231;GO:0045785;GO:0048041;GO:0051017;GO:0051017;GO:…	K07530	ras homolog family member D [Source:MGISymbol;Acc:MGI:108446]
MGP_C57BL6NJ_G0024054	191.625	341.827	41.4223	0.121179	-3.04479	0.00937059	0.284555	17	37487770	37489009	+	1131	Ier3	GO:0043066;	-	immediate early response 3 [Source:MGISymbol;Acc:MGI:104814]
MGP_C57BL6NJ_G0027243	33.1967	64.6561	1.73731	0.02687	-5.21786	0.00939108	0.284555	2	173604220	173667370	-	4255	Jph2	GO:0001786;GO:0001786;GO:0005515;GO:0005515;GO:0005546;GO:0005546;GO:0005547;GO:0005547;GO:0005783;GO:0005783;GO:0005789;GO:0005789;GO:0005886;GO:0005886;GO:0007204;GO:0007204;GO:0007275;GO:0010314;GO:0010314;GO:0015278;GO:0015278;GO:0015278;GO:0015278;GO:0016020;GO:0016020;GO:0016020;GO:0016021;GO:0016529;GO:0016529;GO:0016529;GO:0016529;GO:0030018;GO:0030018;GO:0030314;GO:0030314;GO:0030314;GO:…	K19530	junctophilin 2 [Source:MGI Symbol;Acc:MGI:1891496]"
MGP_C57BL6NJ_G0023108	27.1786	48.7433	5.61394	0.115174	-3.11812	0.00941014	0.284555	16	24209576	24364921	-	3694	P3h2	GO:0005506;GO:0005604;GO:0005604;GO:0005783;GO:0005783;GO:0005783;GO:0005794;GO:0005794;GO:0008285;GO:0008285;GO:0016491;GO:0016491;GO:0016529;GO:0016705;GO:0019511;GO:0019511;GO:0019797;GO:0019797;GO:0019797;GO:0031418;GO:0031418;GO:0032963;GO:0032963;GO:0032963;GO:0046872;GO:0051213;GO:0055114;GO:0055114;	K22459	prolyl 3-hydroxylase 2 [Source:MGISymbol;Acc:MGI:2146663]
MGP_C57BL6NJ_G0029999	90.7993	31.5645	150.034	4.75324	2.24891	0.00943241	0.284555	5	67215261	67215880	-	419	-	-	#N/A	-
MGP_C57BL6NJ_G0028329	64.9536	124.72	5.18769	0.0415949	-4.58745	0.00943746	0.284555	3	145507126	145511925	+	2852	Ddit4l	GO:0003674;GO:0005575;GO:0005737;GO:0005737;GO:0008150;GO:0009968;	-	DNA-damage-inducible transcript 4-like [Source:MGISymbol;Acc:MGI:1920534]
MGP_C57BL6NJ_G0035209	359.24	567.75	150.731	0.265488	-1.91328	0.00946332	0.284767	9	44485055	44537513	-	7429	Phldb1	GO:0003674;GO:0010470;GO:0010717;GO:0045180;GO:0070507;GO:1904261;	-	pleckstrin homology like domain, family B, member 1[Source:MGI Symbol;Acc:MGI:2143230]
MGP_C57BL6NJ_G0028725	580.845	949.452	212.239	0.223538	-2.16141	0.00949854	0.285258	4	55552320	55692541	+	8817	-	-	-	-
MGP_C57BL6NJ_G0016806	48.8236	90.3238	7.32345	0.0810799	-3.62451	0.00962118	0.288368	1	127528249	127537359	-	1311	Tmem37	GO:0005244;GO:0005244;GO:0005262;GO:0005262;GO:0006810;GO:0006811;GO:0006816;GO:0016020;GO:0016021;GO:0016021;GO:0034765;GO:0070588;	-	transmembrane protein 37 [Source:MGISymbol;Acc:MGI:2157899]
MGP_C57BL6NJ_G0027253	47.7299	93.2881	2.17164	0.0232788	-5.42484	0.00965305	0.288751	2	174120072	174132286	+	1924	Wisp2	-	K23089	WNT1 inducible signaling pathway protein 2[Source:MGI Symbol;Acc:MGI:1328326]
MGP_C57BL6NJ_G0034812	388.229	168.665	607.793	3.60356	1.84942	0.00974285	0.290861	9	4286008	4296827	+	2675	Mmp13	GO:0001958;GO:0001958;GO:0001968;GO:0003417;GO:0003417;GO:0004222;GO:0004222;GO:0004222;GO:0004252;GO:0005509;GO:0005509;GO:0005518;GO:0005518;GO:0005576;GO:0005576;GO:0005576;GO:0005578;GO:0005615;GO:0005764;GO:0005794;GO:0006508;GO:0006508;GO:0006508;GO:0006508;GO:0007507;GO:0008233;GO:0008233;GO:0008233;GO:0008237;GO:0008237;GO:0008270;GO:0008270;GO:0008270;GO:0009725;GO:0016787;GO:0022617;GO:…	K07994	matrix metallopeptidase 13 [Source:MGISymbol;Acc:MGI:1340026]
MGP_C57BL6NJ_G0022832	8.68315	0.216849	17.1494	79.0848	6.30533	0.00981999	0.292585	15	108590770	108590934	+	165	Gm10337	GO:0003674;GO:0005575;GO:0008150;	-	predicted gene 10337 [Source:MGISymbol;Acc:MGI:3704459]
MGP_C57BL6NJ_G0029725	99.4677	186.384	12.5515	0.0673424	-3.89234	0.00988838	0.294043	5	11437095	11957959	+	13719	Sema3a	GO:0001764;GO:0002027;GO:0005615;GO:0007411;GO:0007413;GO:0008045;GO:0010633;GO:0021612;GO:0021637;GO:0021675;GO:0021785;GO:0021828;GO:0030215;GO:0030517;GO:0036486;GO:0038191;GO:0045499;GO:0048813;GO:0048841;GO:0048843;GO:0048846;GO:0050919;GO:0060385;GO:0060666;GO:0061549;GO:0061551;GO:0071526;GO:0097490;GO:0097491;GO:0150020;GO:1901166;GO:1902285;GO:1902287;GO:1903045;GO:1903375;GO:2000020;GO:…	K06840	sema domain, immunoglobulin domain (Ig), shortbasic domain, secreted, (semaphorin) 3A [Source:MGISymbol;Acc:MGI:107558]
MGP_C57BL6NJ_G0029207	496.135	222.173	770.097	3.46621	1.79336	0.00996865	0.295428	4	133134935	133175567	+	7115	-	-	-	-
MGP_C57BL6NJ_G0030527	167.454	269.017	65.8913	0.244933	-2.02954	0.00997408	0.295428	5	133289641	133340036	-	2467	Rilpl1	GO:0003382;GO:0003382;GO:0005654;GO:0005737;GO:0005737;GO:0005813;GO:0005813;GO:0005814;GO:0005829;GO:0005829;GO:0005856;GO:0005886;GO:0005929;GO:0005929;GO:0006810;GO:0015031;GO:0016020;GO:0031267;GO:0036064;GO:0042995;GO:0046983;GO:0051959;GO:0060271;GO:1901214;GO:1901214;GO:1901214;GO:1903445;GO:1903445;	K20173	Rab interacting lysosomal protein-like 1[Source:MGI Symbol;Acc:MGI:1922945]
MGP_C57BL6NJ_G0024046	10.9159	21.8319	0	0	-Inf	0.0100263	0.296393	17	37185589	37191720	+	2681	Cdsn	GO:0005576;GO:0005615;GO:0005615;GO:0030057;GO:0042803;GO:0043589;GO:0043589;GO:0098609;	-	corneodesmosin [Source:MGI Symbol;Acc:MGI:3505689]"
MGP_C57BL6NJ_G0028123	142.99	229.946	56.0337	0.243682	-2.03693	0.0101165	0.298476	3	109913316	109935172	+	4426	Slc16a1	GO:0005739;GO:0005739;GO:0005813;GO:0005886;GO:0005886;GO:0005887;GO:0005887;GO:0005887;GO:0005887;GO:0006629;GO:0006629;GO:0006810;GO:0007098;GO:0008028;GO:0008028;GO:0015129;GO:0015129;GO:0015293;GO:0015718;GO:0015718;GO:0016020;GO:0016020;GO:0016021;GO:0016021;GO:0016021;GO:0030054;GO:0032094;GO:0032094;GO:0035873;GO:0035879;GO:0035879;GO:0042593;GO:0042593;GO:0042803;GO:0043231;GO:0050796;GO:…	K08179	solute carrier family 16 (monocarboxylic acidtransporters), member 1 [Source:MGISymbol;Acc:MGI:106013]
MGP_C57BL6NJ_G0018703	494.919	855.528	134.31	0.15699	-2.67125	0.01023	0.300902	11	55212561	55245999	+	6239	P4ha2	GO:0004656;GO:0004656;GO:0004656;GO:0005506;GO:0005515;GO:0005581;GO:0005654;GO:0005783;GO:0005783;GO:0005783;GO:0005783;GO:0005788;GO:0005829;GO:0016020;GO:0016021;GO:0016222;GO:0016491;GO:0016491;GO:0016702;GO:0016705;GO:0018401;GO:0018401;GO:0019511;GO:0031418;GO:0031418;GO:0043231;GO:0046872;GO:0051213;GO:0055114;GO:0055114;	-	procollagen-proline, 2-oxoglutarate 4-dioxygenase(proline 4-hydroxylase), alpha II polypeptide [Source:MGISymbol;Acc:MGI:894286]
MGP_C57BL6NJ_G0031443	22.2709	40.6688	3.87307	0.0952344	-3.39237	0.0102663	0.300902	6	91972700	91988142	+	5396	Gata2	GO:0000122;GO:0000978;GO:0000978;GO:0000979;GO:0000980;GO:0000981;GO:0001077;GO:0001077;GO:0001085;GO:0001158;GO:0001655;GO:0001709;GO:0001764;GO:0001892;GO:0003677;GO:0003677;GO:0003682;GO:0003700;GO:0003700;GO:0003700;GO:0005515;GO:0005515;GO:0005634;GO:0005634;GO:0005634;GO:0005634;GO:0005654;GO:0005667;GO:0005737;GO:0006351;GO:0006351;GO:0006355;GO:0006355;GO:0006355;GO:0006366;GO:0006909;GO:…	K17894	GATA binding protein 2 [Source:MGISymbol;Acc:MGI:95662]
MGP_C57BL6NJ_G0026022	386.929	606.59	167.267	0.27575	-1.85857	0.0102851	0.300902	2	31769167	31774008	-	2694	1110008P14Rik	GO:0003674;GO:0005575;GO:0008150;	-	RIKEN cDNA 1110008P14 gene [Source:MGISymbol;Acc:MGI:1920987]
MGP_C57BL6NJ_G0019032	177.511	349.81	5.21193	0.0148993	-6.06861	0.010291	0.300902	11	75294887	75333156	-	4083	Spns2	GO:0001782;GO:0001782;GO:0002260;GO:0002260;GO:0002920;GO:0002920;GO:0003376;GO:0003376;GO:0005765;GO:0006665;GO:0006665;GO:0006810;GO:0006869;GO:0006869;GO:0016020;GO:0016021;GO:0016021;GO:0031982;GO:0043029;GO:0043029;GO:0046624;GO:0046624;GO:0048073;GO:0048073;GO:0048535;GO:0048535;GO:0055085;GO:0060348;GO:0060348;GO:0072676;GO:0072676;	-	spinster homolog 2 [Source:MGISymbol;Acc:MGI:2384936]
MGP_C57BL6NJ_G0036432	177.602	306.826	48.3774	0.15767	-2.66502	0.010317	0.300902	X	98477267	98492183	+	3452	Efnb1	GO:0001755;GO:0001755;GO:0004713;GO:0005515;GO:0005515;GO:0005634;GO:0005634;GO:0005737;GO:0005737;GO:0005886;GO:0005886;GO:0005886;GO:0007275;GO:0007399;GO:0007399;GO:0007411;GO:0007411;GO:0007411;GO:0009880;GO:0009880;GO:0016020;GO:0016020;GO:0016021;GO:0018108;GO:0030154;GO:0031295;GO:0031295;GO:0042102;GO:0042102;GO:0045121;GO:0045121;GO:0045202;GO:0046875;GO:0046875;GO:0046875;GO:0046875;GO:…	K05463	ephrin B1 [Source:MGI Symbol;Acc:MGI:102708]"
MGP_C57BL6NJ_G0023237	77.4261	128.056	26.7961	0.209253	-2.25668	0.0103273	0.300902	16	38309522	38442888	+	3449	Igsf11	GO:0005886;GO:0005886;GO:0007155;GO:0016020;GO:0016021;GO:0040008;GO:0070062;	K06791	immunoglobulin superfamily, member 11 [Source:MGISymbol;Acc:MGI:2388477]
MGP_C57BL6NJ_G0035383	12.7569	25.5138	0	0	-Inf	0.010347	0.300902	9	59395324	59406466	+	2166	6030419C18Rik	GO:0003674;GO:0005515;GO:0005575;GO:0005886;GO:0008150;GO:0014069;GO:0014069;GO:0016020;GO:0030054;GO:0045202;GO:0045211;GO:0060080;GO:0060080;	-	RIKEN cDNA 6030419C18 gene [Source:MGISymbol;Acc:MGI:2442108]
MGP_C57BL6NJ_G0026838	205.154	84.7045	325.603	3.84399	1.9426	0.0103581	0.300902	2	129731289	129750363	-	2776	Gatm	GO:0005739;GO:0005739;GO:0005739;GO:0005739;GO:0005743;GO:0005758;GO:0006600;GO:0006601;GO:0006601;GO:0006601;GO:0007275;GO:0007584;GO:0007611;GO:0010033;GO:0014889;GO:0015067;GO:0015067;GO:0015067;GO:0015068;GO:0015068;GO:0016020;GO:0016740;GO:0043434;GO:0046689;GO:0070062;GO:0120162;GO:0120162;	K00613	glycine amidinotransferase (L-arginine:glycineamidinotransferase) [Source:MGI Symbol;Acc:MGI:1914342]
MGP_C57BL6NJ_G0016417	2142.5	960.801	3324.19	3.45981	1.79069	0.0104063	0.301724	1	56394828	56485186	-	16611	Pgap1	GO:0004518;GO:0004518;GO:0005783;GO:0005783;GO:0005783;GO:0005789;GO:0006505;GO:0006506;GO:0006810;GO:0006888;GO:0007605;GO:0007605;GO:0009880;GO:0009880;GO:0009948;GO:0009948;GO:0015031;GO:0015798;GO:0015798;GO:0016020;GO:0016021;GO:0016787;GO:0016788;GO:0021871;GO:0021871;GO:0042578;GO:0042578;GO:0050185;GO:0060322;GO:0060322;GO:0090305;	K05294	post-GPI attachment to proteins 1 [Source:MGISymbol;Acc:MGI:2443342]
MGP_C57BL6NJ_G0028034	483.422	214.435	752.409	3.5088	1.81098	0.0105239	0.304515	3	100653575	100664590	-	2622	Fcgr1	GO:0001788;GO:0001788;GO:0001798;GO:0001798;GO:0001805;GO:0001805;GO:0002376;GO:0005886;GO:0005886;GO:0006898;GO:0006898;GO:0006910;GO:0006910;GO:0006911;GO:0006911;GO:0007166;GO:0007166;GO:0009617;GO:0009617;GO:0009897;GO:0009897;GO:0016020;GO:0016021;GO:0019770;GO:0019770;GO:0019864;GO:0019864;GO:0019864;GO:0019884;GO:0019884;GO:0031774;GO:0038094;GO:0042590;GO:0042590;GO:0042742;GO:0042742;GO:…	K06498	Fc receptor, IgG, high affinity I [Source:MGISymbol;Acc:MGI:95498]
MGP_C57BL6NJ_G0017528	576.428	257.494	895.361	3.47721	1.79793	0.0105429	0.304515	10	33177084	33202226	-	2364	Zufsp	GO:0003676;GO:0005634;GO:0005737;GO:0006508;GO:0008150;GO:0016787;GO:0036459;GO:0046872;	-	zinc finger with UFM1-specific peptidase domain[Source:MGI Symbol;Acc:MGI:1919830]
MGP_C57BL6NJ_G0018195	51.0422	86.5834	15.501	0.17903	-2.48173	0.0105639	0.304538	10	135046512	135051653	+	2893	Mettl1	GO:0000049;GO:0003723;GO:0005634;GO:0005634;GO:0005654;GO:0005730;GO:0005829;GO:0006400;GO:0006400;GO:0006400;GO:0008033;GO:0008168;GO:0008176;GO:0008176;GO:0008176;GO:0008176;GO:0016740;GO:0030488;GO:0030488;GO:0032259;GO:0036265;GO:0043527;GO:0106004;	-	methyltransferase like 1 [Source:MGISymbol;Acc:MGI:1339986]
MGP_C57BL6NJ_G0025446	11.5612	22.6881	0.434328	0.0191434	-5.70701	0.0106362	0.305	19	29190848	29228368	+	2886	Il33	GO:0002281;GO:0002282;GO:0002686;GO:0002826;GO:0002830;GO:0002830;GO:0005125;GO:0005125;GO:0005125;GO:0005125;GO:0005125;GO:0005576;GO:0005615;GO:0005634;GO:0005634;GO:0005654;GO:0005694;GO:0005829;GO:0006351;GO:0010469;GO:0010628;GO:0030133;GO:0031410;GO:0032436;GO:0032689;GO:0032736;GO:0032753;GO:0032754;GO:0032755;GO:0043032;GO:0043032;GO:0045944;GO:0050729;GO:0050729;GO:0051024;GO:0051025;GO:…	K12967	interleukin 33 [Source:MGI Symbol;Acc:MGI:1924375]"
MGP_C57BL6NJ_G0028744	344.451	658.588	30.3141	0.0460289	-4.44132	0.0106486	0.305	4	58887156	59058514	-	16117	Svep1	GO:0003682;GO:0003682;GO:0005509;GO:0005576;GO:0005576;GO:0005615;GO:0005615;GO:0005737;GO:0007155;GO:0008150;GO:0016020;	K17495	sushi, von Willebrand factor type A, EGF andpentraxin domain containing 1 [Source:MGISymbol;Acc:MGI:1928849]
MGP_C57BL6NJ_G0032114	731.808	336.022	1127.59	3.35571	1.74662	0.0106556	0.305	7	11250726	11285636	+	4220	Lig1	-	K10747	ligase I, DNA, ATP-dependent [Source:MGISymbol;Acc:MGI:101789]
MGP_C57BL6NJ_G0021344	65.9033	110.667	21.1395	0.191019	-2.38821	0.0106658	0.305	13	121004738	121107656	-	4192	Itga2	GO:0001540;GO:0001540;GO:0002687;GO:0005178;GO:0005518;GO:0005634;GO:0005886;GO:0005886;GO:0005925;GO:0006929;GO:0006971;GO:0007155;GO:0007155;GO:0007160;GO:0007229;GO:0007229;GO:0008305;GO:0009897;GO:0009897;GO:0009986;GO:0009986;GO:0009986;GO:0010634;GO:0010694;GO:0014911;GO:0016020;GO:0016021;GO:0030424;GO:0031346;GO:0031589;GO:0032403;GO:0032967;GO:0033343;GO:0033627;GO:0034666;GO:0038064;GO:…	K06481	integrin alpha 2 [Source:MGI Symbol;Acc:MGI:96600]"
MGP_C57BL6NJ_G0026658	13.9896	27.9791	0	0	-Inf	0.0106809	0.305	2	113097834	113105985	+	4833	Kcna4	GO:0005216;GO:0005216;GO:0005244;GO:0005249;GO:0005249;GO:0005249;GO:0005249;GO:0005251;GO:0005267;GO:0005267;GO:0005515;GO:0005783;GO:0005886;GO:0005887;GO:0005887;GO:0006810;GO:0006811;GO:0006811;GO:0006813;GO:0006813;GO:0008076;GO:0008076;GO:0008076;GO:0008076;GO:0009986;GO:0016020;GO:0016020;GO:0016020;GO:0016020;GO:0016021;GO:0016021;GO:0016021;GO:0016021;GO:0030424;GO:0030424;GO:0030424;GO:…	K04877	potassium voltage-gated channel, shaker-relatedsubfamily, member 4 [Source:MGI Symbol;Acc:MGI:96661]
MGP_C57BL6NJ_G0035503	927.835	1453.69	401.982	0.276525	-1.85452	0.0107492	0.306373	9	73653851	73805449	-	7844	Cgnl1	GO:0003774;GO:0016459;	-	cingulin-like 1 [Source:MGISymbol;Acc:MGI:1915428]
MGP_C57BL6NJ_G0027394	18.3161	3.44298	33.1892	9.63966	3.26898	0.010818	0.30666	2	186218832	186287188	+	9806	Zfp831	GO:0000122;GO:0001206;GO:0003676;GO:0005634;GO:0006366;GO:0007165;GO:0007275;GO:0043565;GO:0044212;	-	zinc finger protein 831 [Source:MGISymbol;Acc:MGI:3641861]
MGP_C57BL6NJ_G0031667	290.925	120.908	460.942	3.81232	1.93067	0.0108384	0.30666	6	129004909	129009591	-	2423	Gdf3	GO:0001501;GO:0001501;GO:0001654;GO:0001654;GO:0001701;GO:0001701;GO:0002021;GO:0002021;GO:0005125;GO:0005125;GO:0005160;GO:0005515;GO:0005576;GO:0005615;GO:0005615;GO:0005737;GO:0005737;GO:0007165;GO:0007165;GO:0007275;GO:0007492;GO:0007492;GO:0007498;GO:0007498;GO:0008083;GO:0008083;GO:0010453;GO:0010453;GO:0010469;GO:0010862;GO:0019901;GO:0019901;GO:0030509;GO:0030514;GO:0030514;GO:0030903;GO:…	K22672	growth differentiation factor 3 [Source:MGISymbol;Acc:MGI:95686]
MGP_C57BL6NJ_G0029707	8.62482	17.2496	0	0	-Inf	0.0108634	0.30666	5	3030471	3042834	-	1377	Steap1	GO:0005768;GO:0005768;GO:0005768;GO:0005768;GO:0005886;GO:0005886;GO:0005886;GO:0005887;GO:0006811;GO:0010008;GO:0016020;GO:0016020;GO:0016021;GO:0016491;GO:0046872;GO:0055072;GO:0055114;	K14737	six transmembrane epithelial antigen of theprostate 1 [Source:MGI Symbol;Acc:MGI:1917608]
MGP_C57BL6NJ_G0036666	21.8147	39.7205	3.90895	0.0984114	-3.34503	0.010889	0.30666	X	152984019	153034000	+	4931	Fgd1	GO:0001726;GO:0001726;GO:0005085;GO:0005085;GO:0005089;GO:0005515;GO:0005515;GO:0005515;GO:0005737;GO:0005737;GO:0005794;GO:0005856;GO:0007010;GO:0008360;GO:0030027;GO:0030027;GO:0030036;GO:0031267;GO:0035023;GO:0042995;GO:0043087;GO:0046847;GO:0046872;GO:0046872;GO:0065009;GO:0001726;GO:0005737;GO:0005794;GO:0007010;GO:0008360;GO:0030027;	K05720	FYVE, RhoGEF and PH domain containing 1 [Source:MGISymbol;Acc:MGI:104566]
MGP_C57BL6NJ_G0019241	8.15332	16.3066	0	0	-Inf	0.0108902	0.30666	11	87362015	87384318	-	3874	Mmp28	GO:0004222;GO:0004222;GO:0005578;GO:0005737;GO:0006508;GO:0006508;GO:0008233;GO:0008237;GO:0008237;GO:0008270;GO:0010760;GO:0016787;GO:0031012;GO:0031012;GO:0046872;GO:0005737;GO:0010760;	-	matrix metallopeptidase 28 (epilysin) [Source:MGISymbol;Acc:MGI:2153062]
MGP_C57BL6NJ_G0027200	10484.5	4732.38	16236.5	3.43094	1.7786	0.0108971	0.30666	2	166844384	166906004	-	8608	Samhd1	GO:0090501;	K22544	SAM domain and HD domain, 1 [Source:MGISymbol;Acc:MGI:1927468]
MGP_C57BL6NJ_G0017338	77.2502	27.2584	127.242	4.66799	2.2228	0.010908	0.30666	1	204395036	204420587	+	5303	Nsl1	GO:0000070;GO:0000776;	-	NSL1, MIS12 kinetochore complex component[Source:MGI Symbol;Acc:MGI:2685830]
MGP_C57BL6NJ_G0022973	2409.95	1116.85	3703.05	3.31562	1.72928	0.0109357	0.30666	16	13695655	13883867	-	8934	Fgd4	GO:0003779;GO:0003779;GO:0005085;GO:0005085;GO:0005089;GO:0005737;GO:0005856;GO:0007257;GO:0008360;GO:0030027;GO:0030027;GO:0030032;GO:0030032;GO:0030035;GO:0030035;GO:0030175;GO:0030175;GO:0030175;GO:0035023;GO:0042995;GO:0046872;GO:0046872;GO:0051015;GO:0065009;	K05723	FYVE, RhoGEF and PH domain containing 4 [Source:MGISymbol;Acc:MGI:2183747]
MGP_C57BL6NJ_G0019813	13.7572	26.2133	1.30104	0.049633	-4.33256	0.010942	0.30666	11	124006940	124024439	-	6384	Evpl	GO:0001533;GO:0001533;GO:0001533;GO:0005198;GO:0005198;GO:0005198;GO:0005737;GO:0005737;GO:0005829;GO:0005856;GO:0005856;GO:0008544;GO:0016020;GO:0018149;GO:0019215;GO:0030054;GO:0030057;GO:0030216;GO:0030674;GO:0030674;GO:0031424;GO:0042060;GO:0045104;GO:0045111;GO:0045296;GO:0070062;	K10383	envoplakin [Source:MGI Symbol;Acc:MGI:107507]"
MGP_C57BL6NJ_G0029619	20.684	37.9336	3.43454	0.0905409	-3.46529	0.010966	0.306765	4	163920467	163926227	-	5761	Smim1	GO:0003674;GO:0005886;GO:0008150;GO:0016020;GO:0016021;GO:0070062;	-	small integral membrane protein 1 [Source:MGISymbol;Acc:MGI:1916109]
MGP_C57BL6NJ_G0021230	137.446	221.287	53.6048	0.242241	-2.04549	0.0109995	0.307133	13	100026630	100044642	-	3307	F2r	GO:0000186;GO:0000186;GO:0001965;GO:0001965;GO:0002248;GO:0002248;GO:0003105;GO:0003105;GO:0004871;GO:0004930;GO:0004930;GO:0004930;GO:0004930;GO:0005102;GO:0005769;GO:0005770;GO:0005886;GO:0005886;GO:0005887;GO:0005901;GO:0005901;GO:0006919;GO:0006919;GO:0006954;GO:0006954;GO:0007165;GO:0007186;GO:0007186;GO:0007186;GO:0007200;GO:0007204;GO:0007204;GO:0007205;GO:0007205;GO:0007260;GO:0007262;GO:…	K03914	coagulation factor II (thrombin) receptor[Source:MGI Symbol;Acc:MGI:101802]
MGP_C57BL6NJ_G0024936	1371.35	2283.48	459.22	0.201105	-2.31398	0.0110232	0.307225	18	69467245	69479272	+	1757	Tubb6	GO:0000166;GO:0000226;GO:0000278;GO:0003924;GO:0003924;GO:0005200;GO:0005200;GO:0005525;GO:0005525;GO:0005525;GO:0005634;GO:0005737;GO:0005737;GO:0005856;GO:0005874;GO:0005874;GO:0005874;GO:0005874;GO:0007010;GO:0007017;GO:0007017;GO:0015630;GO:0070062;	K07375	tubulin, beta 6 class V [Source:MGISymbol;Acc:MGI:1915201]
MGP_C57BL6NJ_G0035427	256.16	112.255	400.065	3.56391	1.83346	0.0110471	0.307325	9	65508373	65551509	-	4283	Zwilch	GO:0007093;GO:1990423;	K11579	zwilch kinetochore protein [Source:MGISymbol;Acc:MGI:1915264]
MGP_C57BL6NJ_G0036503	203.499	81.8008	325.196	3.97547	1.99113	0.0110795	0.30749	X	106395881	106427421	-	5142	Cysltr1	GO:0002437;GO:0002437;GO:0003013;GO:0004871;GO:0004930;GO:0004930;GO:0004966;GO:0004974;GO:0004974;GO:0004974;GO:0005515;GO:0005886;GO:0005887;GO:0005887;GO:0005887;GO:0006816;GO:0006816;GO:0006935;GO:0006935;GO:0006954;GO:0007165;GO:0007166;GO:0007166;GO:0007186;GO:0007186;GO:0007200;GO:0007218;GO:0008528;GO:0016020;GO:0016021;GO:0016021;GO:0045766;GO:0045907;GO:0061737;	K04322	cysteinyl leukotriene receptor 1 [Source:MGISymbol;Acc:MGI:1926218]
MGP_C57BL6NJ_G0033361	162.303	310.741	13.8645	0.0446177	-4.48624	0.0110938	0.30749	7	120408164	120459329	-	3357	Dkk3	GO:0005576;GO:0005576;GO:0005576;GO:0005615;GO:0005615;GO:0005615;GO:0005615;GO:0007275;GO:0007275;GO:0016055;GO:0030178;GO:0032348;GO:0039706;GO:0045892;GO:0048019;GO:0090090;GO:0090090;GO:1900116;GO:2000065;	-	dickkopf WNT signaling pathway inhibitor 3[Source:MGI Symbol;Acc:MGI:1354952]
MGP_C57BL6NJ_G0025119	119.648	226.731	12.5654	0.05542	-4.17345	0.0111383	0.308159	19	2470854	2480774	+	1707	Fosl1	GO:0000977;GO:0000977;GO:0000978;GO:0000978;GO:0001077;GO:0001701;GO:0001701;GO:0003677;GO:0003677;GO:0003677;GO:0003700;GO:0005634;GO:0005634;GO:0005634;GO:0005634;GO:0005654;GO:0005829;GO:0006355;GO:0006357;GO:0007296;GO:0007296;GO:0008285;GO:0031668;GO:0031668;GO:0042734;GO:0043005;GO:0043065;GO:0043231;GO:0045787;GO:0045944;GO:0051091;GO:0060674;GO:0060674;GO:0061614;GO:2000144;	K04502	fos-like antigen 1 [Source:MGISymbol;Acc:MGI:107179]
MGP_C57BL6NJ_G0028230	412.424	186.199	638.649	3.42992	1.77817	0.0111735	0.308569	3	122847832	122889373	+	6063	Sass6	GO:0003674;GO:0005737;GO:0005813;GO:0005814;GO:0005814;GO:0005815;GO:0005815;GO:0005829;GO:0005856;GO:0007049;GO:0007099;GO:0007099;GO:0051298;GO:0098536;GO:0005814;GO:0098536;	K16487	SAS-6 centriolar assembly protein [Source:MGISymbol;Acc:MGI:1920026]
MGP_C57BL6NJ_G0019719	46.5866	14.2979	78.8752	5.51655	2.46377	0.0112617	0.310047	11	115301118	115762051	+	6175	Cep112	GO:0003674;GO:0005737;GO:0005813;GO:0005813;GO:0005815;GO:0005856;GO:0005886;GO:0060077;GO:0097120;	K16767	centrosomal protein 112 [Source:MGISymbol;Acc:MGI:1923673]
MGP_C57BL6NJ_G0023075	18.1114	33.6492	2.57365	0.0764845	-3.70869	0.0112683	0.310047	16	18990621	19009171	+	6289	Ephb3	GO:0000166;GO:0001525;GO:0001525;GO:0001655;GO:0001655;GO:0004672;GO:0004713;GO:0004713;GO:0004713;GO:0004713;GO:0004714;GO:0004714;GO:0004888;GO:0005003;GO:0005003;GO:0005003;GO:0005005;GO:0005005;GO:0005524;GO:0005524;GO:0005737;GO:0005886;GO:0005887;GO:0005887;GO:0005887;GO:0005887;GO:0006468;GO:0007169;GO:0007275;GO:0007399;GO:0007411;GO:0007411;GO:0007411;GO:0007413;GO:0007413;GO:0008046;GO:…	K05112	Eph receptor B3 [Source:MGI Symbol;Acc:MGI:104770]"
MGP_C57BL6NJ_G0017826	9.82284	19.6457	0	0	-Inf	0.0112886	0.310047	10	82035562	82065463	+	2089	Slc1a6	GO:0001504;GO:0005313;GO:0005313;GO:0005314;GO:0005314;GO:0005794;GO:0005794;GO:0005886;GO:0005887;GO:0005887;GO:0006810;GO:0006865;GO:0008509;GO:0015293;GO:0015293;GO:0015813;GO:0015813;GO:0016020;GO:0016020;GO:0016020;GO:0016021;GO:0016021;GO:0042391;GO:0042391;GO:0045111;GO:0046872;GO:0055085;GO:0089711;GO:0098688;GO:0098712;GO:0098712;GO:0099055;	K05617	solute carrier family 1 (high affinityaspartate/glutamate transporter), member 6 [Source:MGISymbol;Acc:MGI:1096331]
MGP_C57BL6NJ_G0017512	8.26925	16.5385	0	0	-Inf	0.0113579	0.311385	10	28465718	28552545	-	2394	Rspo3	GO:0001525;GO:0001525;GO:0001974;GO:0001974;GO:0002040;GO:0002040;GO:0005102;GO:0005102;GO:0005109;GO:0005109;GO:0005109;GO:0005576;GO:0005576;GO:0005576;GO:0005615;GO:0008201;GO:0008201;GO:0008201;GO:0016055;GO:0050896;GO:0060670;GO:0060670;GO:0090263;GO:0090263;GO:0090263;GO:2000052;GO:2000052;	K23098	R-spondin 3 [Source:MGI Symbol;Acc:MGI:1920030]"
MGP_C57BL6NJ_G0016996	43.129	82.8156	3.4423	0.0415659	-4.58846	0.0114161	0.312413	1	163188646	163371791	+	5809	Nmnat2	GO:0000139;GO:0000166;GO:0000309;GO:0000309;GO:0003824;GO:0004515;GO:0004515;GO:0004515;GO:0005524;GO:0005737;GO:0005770;GO:0005794;GO:0005794;GO:0005794;GO:0005802;GO:0009058;GO:0009435;GO:0016020;GO:0016740;GO:0016779;GO:0019363;GO:0030424;GO:0030659;GO:0031410;GO:0034628;GO:0042995;GO:0045202;GO:0005770;GO:0005794;GO:0005802;GO:0045202;	-	nicotinamide nucleotide adenylyltransferase 2[Source:MGI Symbol;Acc:MGI:2444155]
MGP_C57BL6NJ_G0027778	308.671	586.568	30.7736	0.0524638	-4.25253	0.0116996	0.319593	3	90378263	90478103	-	7463	Kirrel	GO:0001933;GO:0005515;GO:0005886;GO:0005886;GO:0005911;GO:0007588;GO:0016020;GO:0016021;GO:0017022;GO:0030838;GO:0031253;GO:0043198;GO:0045121;GO:0048471;GO:0070062;GO:0098609;GO:0001933;GO:0005886;GO:0005911;GO:0007588;GO:0030838;GO:0043198;GO:0098609;	-	kin of IRRE like (Drosophila) [Source:MGISymbol;Acc:MGI:1891396]
MGP_C57BL6NJ_G0024270	8.09033	16.1807	0	0	-Inf	0.0117437	0.320218	17	51620352	51636328	+	994	Trem3	GO:0002374;GO:0002374;GO:0002526;GO:0005515;GO:0005515;GO:0005886;GO:0016020;GO:0016021;GO:0016477;GO:0016477;GO:0030593;GO:0030593;GO:0038023;GO:0042107;GO:0042107;GO:0045089;GO:0045089;GO:0050755;GO:0050755;GO:0070945;GO:0070945;GO:0072672;GO:0072672;	-	triggering receptor expressed on myeloid cells 3[Source:MGI Symbol;Acc:MGI:1930003]
MGP_C57BL6NJ_G0020274	352.724	157.126	548.322	3.48969	1.8031	0.0118134	0.321538	12	82808495	82813763	-	2999	Zfp36l1	GO:0000165;GO:0000165;GO:0000165;GO:0000288;GO:0000288;GO:0000932;GO:0000932;GO:0001570;GO:0001570;GO:0003342;GO:0003342;GO:0003677;GO:0003723;GO:0003723;GO:0003729;GO:0003729;GO:0003729;GO:0003730;GO:0005515;GO:0005634;GO:0005634;GO:0005634;GO:0005737;GO:0005737;GO:0005737;GO:0005829;GO:0005829;GO:0006397;GO:0006402;GO:0006417;GO:0006417;GO:0006810;GO:0006915;GO:0006915;GO:0007275;GO:0007507;GO:…	K18753	zinc finger protein 36, C3H type-like 1 [Source:MGISymbol;Acc:MGI:107946]
MGP_C57BL6NJ_G0024226	170.321	316.793	23.8486	0.0752812	-3.73157	0.0118613	0.32226	17	49686002	49756898	-	4255	Ptk7	GO:0001736;GO:0001736;GO:0001736;GO:0001736;GO:0001843;GO:0001843;GO:0003281;GO:0003281;GO:0003401;GO:0003401;GO:0003401;GO:0005886;GO:0005886;GO:0005887;GO:0005911;GO:0005911;GO:0005911;GO:0005925;GO:0007155;GO:0007507;GO:0007507;GO:0010976;GO:0016020;GO:0016020;GO:0016020;GO:0016021;GO:0016055;GO:0016055;GO:0016310;GO:0016477;GO:0018108;GO:0030054;GO:0031532;GO:0042060;GO:0042060;GO:0045198;GO:…	K05127	PTK7 protein tyrosine kinase 7 [Source:MGISymbol;Acc:MGI:1918711]
MGP_C57BL6NJ_G0031383	60.5259	117.577	3.47462	0.0295519	-5.08061	0.0119207	0.322759	6	87404597	87634524	+	8340	Dysf	GO:0001525;GO:0001778;GO:0001778;GO:0001938;GO:0002280;GO:0002281;GO:0005509;GO:0005509;GO:0005515;GO:0005515;GO:0005543;GO:0005543;GO:0005544;GO:0005634;GO:0005737;GO:0005768;GO:0005769;GO:0005770;GO:0005794;GO:0005815;GO:0005874;GO:0005886;GO:0005886;GO:0006071;GO:0006906;GO:0008017;GO:0008289;GO:0010629;GO:0016020;GO:0016021;GO:0016021;GO:0019915;GO:0030027;GO:0030139;GO:0030315;GO:0030659;GO:…	K18261	dysferlin [Source:MGI Symbol;Acc:MGI:1349385]"
MGP_C57BL6NJ_G0017870	665.169	1176.09	154.245	0.13115	-2.93071	0.0119367	0.322759	10	83345836	83353139	+	2460	Cnn2	GO:0001725;GO:0003779;GO:0003779;GO:0005516;GO:0005856;GO:0005925;GO:0007010;GO:0010628;GO:0010628;GO:0016020;GO:0030097;GO:0030097;GO:0030336;GO:0030336;GO:0031032;GO:0032970;GO:0042060;GO:0042060;GO:0042127;GO:0042127;GO:0045296;GO:0050765;GO:0050765;GO:0070062;GO:0071260;	-	calponin 2 [Source:MGI Symbol;Acc:MGI:105093]"
MGP_C57BL6NJ_G0034087	2506.64	1186.75	3826.52	3.22436	1.68901	0.0119438	0.322759	8	47591795	47708659	+	2531	Irf2	GO:0000977;GO:0001228;GO:0003677;GO:0003677;GO:0003700;GO:0003700;GO:0005634;GO:0005654;GO:0005829;GO:0005925;GO:0006351;GO:0006355;GO:0006355;GO:0006355;GO:0006366;GO:0008283;GO:0044212;GO:0045944;GO:0051607;	K10153	interferon regulatory factor 2 [Source:MGISymbol;Acc:MGI:96591]
MGP_C57BL6NJ_G0021827	387.281	175.819	598.743	3.40546	1.76785	0.0120012	0.323731	14	56371076	56413311	-	4047	Setdb2	GO:0000278;GO:0000278;GO:0001947;GO:0003677;GO:0005634;GO:0005634;GO:0005634;GO:0005654;GO:0005694;GO:0005829;GO:0006325;GO:0007049;GO:0007059;GO:0007059;GO:0007275;GO:0008168;GO:0008270;GO:0016569;GO:0016740;GO:0018024;GO:0018024;GO:0032259;GO:0034968;GO:0045892;GO:0046872;GO:0046974;GO:0046974;GO:0051301;GO:0051567;GO:0051567;GO:0070986;	K18494	SET domain, bifurcated 2 [Source:MGISymbol;Acc:MGI:2685139]
MGP_C57BL6NJ_G0030068	235.25	448.375	22.1249	0.0493445	-4.34097	0.012052	0.324524	5	78303537	78349133	+	10024	Pdgfra	GO:0000166;GO:0001553;GO:0001701;GO:0002244;GO:0004672;GO:0004672;GO:0004713;GO:0004713;GO:0004713;GO:0004714;GO:0004714;GO:0004714;GO:0004714;GO:0004888;GO:0005018;GO:0005018;GO:0005018;GO:0005018;GO:0005021;GO:0005021;GO:0005161;GO:0005524;GO:0005524;GO:0005634;GO:0005634;GO:0005737;GO:0005737;GO:0005737;GO:0005886;GO:0005886;GO:0005887;GO:0005887;GO:0005887;GO:0005902;GO:0006468;GO:0006935;GO:…	-	platelet derived growth factor receptor, alphapolypeptide [Source:MGI Symbol;Acc:MGI:97530]
MGP_C57BL6NJ_G0026664	92.5993	157.139	28.06	0.178568	-2.48545	0.0121142	0.325617	2	115934053	116036835	+	5882	Lgr4	GO:0001649;GO:0001942;GO:0002376;GO:0004871;GO:0004888;GO:0004888;GO:0005515;GO:0005886;GO:0005887;GO:0005887;GO:0007165;GO:0007186;GO:0007186;GO:0007275;GO:0007283;GO:0007623;GO:0016020;GO:0016021;GO:0016021;GO:0016055;GO:0016500;GO:0030154;GO:0030282;GO:0030539;GO:0032922;GO:0034122;GO:0035239;GO:0036335;GO:0045087;GO:0045892;GO:0045893;GO:0046849;GO:0048511;GO:0048565;GO:0050673;GO:0050710;GO:…	K04309	leucine-rich repeat-containing G protein-coupledreceptor 4 [Source:MGI Symbol;Acc:MGI:1891468]
MGP_C57BL6NJ_G0026050	1410.48	2188.06	632.899	0.289252	-1.7896	0.0121519	0.326051	2	32670536	32702196	+	6286	Angptl2	GO:0005576;GO:0005615;GO:0005615;GO:0070062;	-	angiopoietin-like 2 [Source:MGISymbol;Acc:MGI:1347002]
MGP_C57BL6NJ_G0031528	48.7967	94.5613	3.03221	0.0320661	-4.96281	0.0121992	0.32674	6	105828736	106072324	-	7256	Pdzrn3	GO:0004842;GO:0004842;GO:0005515;GO:0005634;GO:0005654;GO:0005737;GO:0005829;GO:0007528;GO:0007528;GO:0007528;GO:0008270;GO:0016567;GO:0016567;GO:0016567;GO:0016740;GO:0030054;GO:0031594;GO:0031594;GO:0031594;GO:0045202;GO:0046872;GO:0061630;GO:0061630;GO:0061630;	K15682	PDZ domain containing RING finger 3 [Source:MGISymbol;Acc:MGI:1933157]
MGP_C57BL6NJ_G0021207	67.3925	128.704	6.08059	0.0472446	-4.40371	0.0122795	0.328048	13	96942490	96986572	-	3289	Thbs4	GO:0001938;GO:0001938;GO:0001968;GO:0001968;GO:0005178;GO:0005178;GO:0005201;GO:0005509;GO:0005509;GO:0005509;GO:0005509;GO:0005515;GO:0005515;GO:0005515;GO:0005518;GO:0005518;GO:0005576;GO:0005576;GO:0005578;GO:0005604;GO:0005604;GO:0005615;GO:0005615;GO:0005615;GO:0005615;GO:0005783;GO:0005783;GO:0006986;GO:0007155;GO:0007155;GO:0007399;GO:0008083;GO:0008201;GO:0008201;GO:0010469;GO:0016525;GO:…	K04659	thrombospondin 4 [Source:MGISymbol;Acc:MGI:1101779]
MGP_C57BL6NJ_G0025101	81.7944	144.172	19.4164	0.134675	-2.89245	0.0123091	0.328048	19	2033972	2040246	+	4218	Rin1	GO:0005096;GO:0005515;GO:0005737;GO:0005737;GO:0005856;GO:0005886;GO:0006897;GO:0007165;GO:0007613;GO:0007613;GO:0008306;GO:0008306;GO:0016020;GO:0017016;GO:0017016;GO:0030425;GO:0030425;GO:0031914;GO:0031914;GO:0043025;GO:0043025;GO:0043547;	K17638	Ras and Rab interactor 1 [Source:MGISymbol;Acc:MGI:2385695]
MGP_C57BL6NJ_G0029252	30.0156	6.53847	53.4927	8.18122	3.03232	0.0123132	0.328048	4	136426404	136451032	-	2929	Lck	GO:0000166;GO:0000242;GO:0000242;GO:0001772;GO:0001784;GO:0003823;GO:0004672;GO:0004713;GO:0004713;GO:0004713;GO:0004713;GO:0004715;GO:0004715;GO:0004722;GO:0004722;GO:0005102;GO:0005515;GO:0005515;GO:0005515;GO:0005524;GO:0005524;GO:0005737;GO:0005829;GO:0005886;GO:0005886;GO:0005911;GO:0006468;GO:0006468;GO:0006470;GO:0006882;GO:0006919;GO:0006919;GO:0007166;GO:0007169;GO:0008022;GO:0009612;GO:…	K05856	lymphocyte protein tyrosine kinase [Source:MGISymbol;Acc:MGI:96756]
MGP_C57BL6NJ_G0021240	37.6607	73.1497	2.17164	0.0296876	-5.074	0.0123369	0.328101	13	101444063	101472043	+	5093	Gcnt4	GO:0000139;GO:0002121;GO:0002121;GO:0003829;GO:0005794;GO:0006486;GO:0008375;GO:0016020;GO:0016020;GO:0016021;GO:0016740;GO:0016757;GO:0042403;GO:0042403;GO:0048729;GO:0048729;GO:0048872;GO:0048872;GO:0060993;GO:0060993;	K09663	glucosaminyl (N-acetyl) transferase 4, core 2(beta-1,6-N-acetylglucosaminyltransferase) [Source:MGISymbol;Acc:MGI:2684919]
MGP_C57BL6NJ_G0034476	108.497	178.676	38.3177	0.214453	-2.22127	0.0123602	0.328144	8	100067761	100104270	-	3593	Kifc3	GO:0000166;GO:0003774;GO:0003777;GO:0003777;GO:0005524;GO:0005524;GO:0005737;GO:0005794;GO:0005794;GO:0005813;GO:0005813;GO:0005815;GO:0005856;GO:0005871;GO:0005871;GO:0005871;GO:0005874;GO:0005874;GO:0005912;GO:0005915;GO:0005915;GO:0007017;GO:0007017;GO:0007018;GO:0007018;GO:0007030;GO:0007030;GO:0008017;GO:0008017;GO:0008569;GO:0008569;GO:0016020;GO:0016887;GO:0030054;GO:0030659;GO:0031410;GO:…	K10406	kinesin family member C3 [Source:MGISymbol;Acc:MGI:109202]
MGP_C57BL6NJ_G0026194	117.391	225.268	9.51481	0.0422377	-4.56532	0.0123946	0.328479	2	66583249	66717982	-	7185	Grb14	GO:0005070;	-	growth factor receptor bound protein 14 [Source:MGISymbol;Acc:MGI:1355324]
MGP_C57BL6NJ_G0019246	757.366	340.663	1174.07	3.44642	1.7851	0.0124736	0.329159	11	87533203	87538392	-	1795	Ccl6	GO:0002548;GO:0005125;GO:0005576;GO:0005576;GO:0005615;GO:0005615;GO:0006935;GO:0006954;GO:0006955;GO:0007186;GO:0008009;GO:0008009;GO:0008009;GO:0010469;GO:0030593;GO:0043547;GO:0048020;GO:0048245;GO:0048247;GO:0060326;GO:0070098;GO:0070374;GO:0071346;GO:0071347;GO:0071356;	K05510	chemokine (C-C motif) ligand 6 [Source:MGISymbol;Acc:MGI:98263]
MGP_C57BL6NJ_G0027316	472.561	916.191	28.9302	0.0315767	-4.985	0.0124874	0.329159	2	175895729	175909130	-	3657	Ocstamp	GO:0003674;GO:0005575;GO:0016020;GO:0016021;GO:0016021;GO:0030154;GO:0034241;GO:0034241;GO:0045672;GO:0045672;GO:0071356;GO:0071356;GO:0071391;GO:0071391;GO:0072674;GO:0072674;GO:0090290;GO:0090290;	-	osteoclast stimulatory transmembrane protein[Source:MGI Symbol;Acc:MGI:1921864]
MGP_C57BL6NJ_G0026870	187.751	78.1097	297.391	3.80736	1.92879	0.0125174	0.329159	2	134466327	134498940	-	4307	Ncaph	GO:0000796;GO:0000796;GO:0000796;GO:0000799;GO:0003682;GO:0005634;GO:0005634;GO:0005634;GO:0005694;GO:0005694;GO:0005694;GO:0005737;GO:0005829;GO:0007049;GO:0007076;GO:0007076;GO:0007076;GO:0007143;GO:0007143;GO:0010032;GO:0010032;GO:0016020;GO:0030261;GO:0044547;GO:0045132;GO:0045132;GO:0051301;GO:0051309;GO:0051309;GO:0072587;GO:2000373;	K06676	non-SMC condensin I complex, subunit H [Source:MGISymbol;Acc:MGI:2444777]
MGP_C57BL6NJ_G0019739	3791.66	1790.56	5792.75	3.23516	1.69384	0.0125467	0.329159	11	118193006	118205834	+	5430	Kcnj2	GO:0005242;GO:0005242;GO:0005242;GO:0005242;GO:0005244;GO:0005515;GO:0005546;GO:0005790;GO:0005791;GO:0005794;GO:0005886;GO:0005887;GO:0006810;GO:0006811;GO:0006813;GO:0006813;GO:0006813;GO:0008076;GO:0010107;GO:0010107;GO:0014704;GO:0014861;GO:0015693;GO:0015693;GO:0016020;GO:0016020;GO:0016021;GO:0016021;GO:0030315;GO:0030425;GO:0031224;GO:0031224;GO:0034765;GO:0042802;GO:0042802;GO:0043025;GO:…	K04996	potassium inwardly-rectifying channel, subfamily J,member 2 [Source:MGI Symbol;Acc:MGI:104744]
MGP_C57BL6NJ_G0026198	10.4177	20.8353	0	0	-Inf	0.012553	0.329159	2	67369520	67522890	+	12209	Scn2a1	GO:0001518;GO:0001518;GO:0001518;GO:0001518;GO:0005216;GO:0005244;GO:0005248;GO:0005248;GO:0005248;GO:0005248;GO:0005272;GO:0005622;GO:0005886;GO:0005886;GO:0006810;GO:0006811;GO:0006811;GO:0006814;GO:0006814;GO:0006814;GO:0006814;GO:0007399;GO:0007399;GO:0008627;GO:0008627;GO:0014704;GO:0014704;GO:0016020;GO:0016020;GO:0016020;GO:0016020;GO:0016021;GO:0019228;GO:0019228;GO:0030315;GO:0030315;GO:…	K04834	sodium channel, voltage-gated, type II, alpha 1[Source:MGI Symbol;Acc:MGI:98248]
MGP_C57BL6NJ_G0035307	48.7712	16.4234	81.119	4.93924	2.30429	0.0125657	0.329159	9	54202982	54228089	-	2971	Rab39	GO:0000166;GO:0003924;GO:0003924;GO:0005515;GO:0005525;GO:0005525;GO:0005764;GO:0005794;GO:0005886;GO:0006810;GO:0006886;GO:0006914;GO:0015031;GO:0016020;GO:0030670;GO:0031410;GO:0032482;GO:0045335;GO:0045335;GO:0090383;GO:0090383;GO:0090385;GO:0090385;	K07924	RAB39, member RAS oncogene family [Source:MGISymbol;Acc:MGI:2442855]
MGP_C57BL6NJ_G0032597	9.57476	0.625996	18.5235	29.5905	4.88706	0.0125785	0.329159	7	45644739	45645915	+	914	Nkg7	GO:0016020;GO:0016021;GO:0016021;	-	natural killer cell group 7 sequence [Source:MGISymbol;Acc:MGI:1931250]
MGP_C57BL6NJ_G0018970	116.296	186.877	45.7148	0.244625	-2.03135	0.0126154	0.329159	11	72633630	72663909	+	4992	Dlg4	GO:0002091;GO:0002091;GO:0004385;GO:0005102;GO:0005109;GO:0005198;GO:0005515;GO:0005515;GO:0005515;GO:0005515;GO:0005737;GO:0005737;GO:0005737;GO:0005783;GO:0005783;GO:0005886;GO:0005886;GO:0005886;GO:0005886;GO:0006461;GO:0006461;GO:0007204;GO:0007204;GO:0007268;GO:0007626;GO:0008021;GO:0008021;GO:0008022;GO:0008022;GO:0008076;GO:0008076;GO:0008328;GO:0008328;GO:0014069;GO:0014069;GO:0014069;GO:…	K11828	discs, large homolog 4 (Drosophila) [Source:MGISymbol;Acc:MGI:1277959]
MGP_C57BL6NJ_G0033061	229.297	429.712	28.8818	0.067212	-3.89514	0.0126273	0.329159	7	107721536	107790341	-	10394	Arhgef17	GO:0005085;GO:0005085;GO:0005085;GO:0005089;GO:0005089;GO:0030036;GO:0030036;GO:0035023;GO:0065009;	K20689	Rho guanine nucleotide exchange factor (GEF) 17[Source:MGI Symbol;Acc:MGI:2673002]
MGP_C57BL6NJ_G0031806	17.0194	1.25199	32.7868	26.1877	4.71082	0.0126392	0.329159	6	137782720	137807048	-	1764	Klra1	GO:0016020;GO:0016021;GO:0030246;	-	killer cell lectin-like receptor, subfamily A,member 1 [Source:MGI Symbol;Acc:MGI:101907]
MGP_C57BL6NJ_G0020923	163.216	310.861	15.5721	0.0500936	-4.31923	0.012678	0.329159	13	50051125	50067554	+	2540	Ogn	GO:0005576;GO:0005576;GO:0005578;GO:0005578;GO:0005615;GO:0005615;GO:0005615;GO:0007409;GO:0008083;GO:0010469;GO:0030021;GO:0031012;GO:0062023;GO:0070062;GO:1903561;	K08126	osteoglycin [Source:MGI Symbol;Acc:MGI:109278]"
MGP_C57BL6NJ_G0021333	118.77	227.55	9.98954	0.0439004	-4.50962	0.0127582	0.329159	13	119071224	119076670	-	1016	Gpx8	GO:0004601;GO:0004601;GO:0004602;GO:0004602;GO:0005575;GO:0006979;GO:0016020;GO:0016021;GO:0016491;GO:0055114;GO:0055114;GO:0098869;	K00432	glutathione peroxidase 8 (putative) [Source:MGISymbol;Acc:MGI:1916840]
MGP_C57BL6NJ_G0017385	308.551	140.832	476.27	3.38182	1.7578	0.0127606	0.329159	10	2976080	2982520	-	2003	Fbxo5	GO:0001556;GO:0001556;GO:0005515;GO:0005634;GO:0005634;GO:0005634;GO:0005654;GO:0005737;GO:0005737;GO:0005737;GO:0005819;GO:0005819;GO:0005856;GO:0007049;GO:0007057;GO:0007057;GO:0007088;GO:0007346;GO:0007346;GO:0016050;GO:0016050;GO:0016567;GO:0019901;GO:0040020;GO:0040020;GO:0045835;GO:0045835;GO:0045835;GO:0045841;GO:0046785;GO:0046785;GO:0046872;GO:0051225;GO:0051225;GO:0051301;GO:0051436;GO:…	K10292	F-box protein 5 [Source:MGISymbol;Acc:MGI:1914391]
MGP_C57BL6NJ_G0023505	9.49284	0.455704	18.53	40.6623	5.34562	0.0127722	0.329159	16	101078332	101699585	-	7498	Dscam	GO:0005515;GO:0005515;GO:0005886;GO:0005886;GO:0005886;GO:0005886;GO:0005887;GO:0007155;GO:0007155;GO:0007156;GO:0007156;GO:0007162;GO:0007162;GO:0007399;GO:0007399;GO:0007411;GO:0007416;GO:0007626;GO:0007626;GO:0010842;GO:0016020;GO:0016021;GO:0030054;GO:0030424;GO:0030424;GO:0030424;GO:0030426;GO:0030426;GO:0042327;GO:0042327;GO:0042995;GO:0045202;GO:0048813;GO:0048813;GO:0048842;GO:0048842;GO:…	K06767	Down syndrome cell adhesion molecule [Source:MGISymbol;Acc:MGI:1196281]
MGP_C57BL6NJ_G0030581	57.8051	110.431	5.17961	0.0469038	-4.41415	0.0127938	0.329159	5	140820033	141982929	-	21565	Auts2	GO:0001764;GO:0001764;GO:0001764;GO:0003682;GO:0003682;GO:0005515;GO:0005515;GO:0005634;GO:0005634;GO:0005634;GO:0005634;GO:0005737;GO:0005856;GO:0006351;GO:0006355;GO:0010592;GO:0010592;GO:0010592;GO:0015629;GO:0015629;GO:0030426;GO:0030426;GO:0030426;GO:0031532;GO:0031532;GO:0031532;GO:0035022;GO:0035022;GO:0035022;GO:0042995;GO:0045944;GO:0045944;GO:0048675;GO:0048675;GO:0048675;GO:0051571;GO:…	-	autism susceptibility candidate 2 [Source:MGISymbol;Acc:MGI:1919847]
MGP_C57BL6NJ_G0022249	1352.33	2094.67	609.997	0.291214	-1.77985	0.0128539	0.329159	15	54121109	54417524	-	8077	Ext1	GO:0000139;GO:0001503;GO:0005783;GO:0005783;GO:0005783;GO:0005789;GO:0005794;GO:0005794;GO:0006024;GO:0006486;GO:0006486;GO:0007369;GO:0007369;GO:0007411;GO:0007411;GO:0007420;GO:0007420;GO:0007492;GO:0007492;GO:0007498;GO:0007498;GO:0008375;GO:0015012;GO:0015012;GO:0015012;GO:0015012;GO:0015014;GO:0015020;GO:0015020;GO:0016020;GO:0016021;GO:0016021;GO:0016740;GO:0016757;GO:0016757;GO:0016757;GO:…	K02366	exostoses (multiple) 1 [Source:MGISymbol;Acc:MGI:894663]
MGP_C57BL6NJ_G0020585	177.82	284.089	71.5515	0.251863	-1.98929	0.0128808	0.329159	13	432189	481533	-	3544	Net1	GO:0005085;GO:0005085;GO:0005089;GO:0005515;GO:0005622;GO:0005634;GO:0005634;GO:0005634;GO:0005737;GO:0005886;GO:0005886;GO:0017049;GO:0017049;GO:0035023;GO:0035556;GO:0043065;GO:0043065;GO:0043547;GO:0043547;GO:0051451;GO:0051451;GO:0065009;GO:0070301;GO:0070301;GO:0071479;GO:0071479;GO:1900026;GO:1900026;	K20683	neuroepithelial cell transforming gene 1[Source:MGI Symbol;Acc:MGI:1927138]
MGP_C57BL6NJ_G0035849	40.3263	68.983	11.6696	0.169167	-2.56348	0.0128904	0.329159	9	115850555	115853872	-	1817	Nradd	GO:0005031;GO:0005166;GO:0005515;GO:0005634;GO:0005634;GO:0005634;GO:0005641;GO:0005641;GO:0005886;GO:0005887;GO:0006915;GO:0006954;GO:0006955;GO:0007165;GO:0007275;GO:0010942;GO:0016020;GO:0016020;GO:0016020;GO:0016021;GO:0030027;GO:0030027;GO:0032496;GO:0032589;GO:0033209;GO:0042127;GO:0042981;GO:0044298;GO:0097190;	-	neurotrophin receptor associated death domain[Source:MGI Symbol;Acc:MGI:1914419]
MGP_C57BL6NJ_G0021527	16.2291	30.2885	2.1697	0.0716344	-3.8032	0.0129289	0.329159	14	26590505	26616394	+	3794	Ogdhl	GO:0004591;GO:0004591;GO:0005739;GO:0006099;GO:0006099;GO:0008152;GO:0016624;GO:0030976;GO:0045252;GO:0055114;	K00164	oxoglutarate dehydrogenase-like [Source:MGISymbol;Acc:MGI:3616088]
MGP_C57BL6NJ_G0016396	1447.43	659.956	2234.91	3.38645	1.75977	0.0129402	0.329159	1	53800977	53842750	+	7105	Stat1	GO:0003677;GO:0003677;GO:0003700;GO:0004871;GO:0004871;GO:0005634;GO:0005634;GO:0005737;GO:0006351;GO:0006355;GO:0006355;GO:0007165;	K11220	signal transducer and activator of transcription 1[Source:MGI Symbol;Acc:MGI:103063]
MGP_C57BL6NJ_G0028325	50.6145	15.4006	85.8283	5.57303	2.47846	0.0129444	0.329159	3	143825953	144108848	-	7486	Bank1	GO:0005102;GO:0005515;GO:0005575;GO:0009617;GO:0009617;GO:0042113;GO:0042113;GO:0043410;GO:0043410;GO:0045947;GO:0045947;GO:0050731;GO:0050869;GO:0050869;GO:0051898;GO:0051898;GO:1900165;GO:1900165;GO:1990782;	-	B cell scaffold protein with ankyrin repeats 1[Source:MGI Symbol;Acc:MGI:2442120]
MGP_C57BL6NJ_G0030856	3354.79	1603.97	5105.6	3.1831	1.67043	0.0129617	0.329159	6	80437	92987	-	5122	Samd9l	-	-	sterile alpha motif domain containing 9-like[Source:MGI Symbol;Acc:MGI:1343184]
MGP_C57BL6NJ_G0031322	49.079	94.6931	3.46492	0.0365911	-4.77237	0.0129965	0.329159	6	75110308	75279575	-	3925	Tcf7l1	GO:0003677;GO:0005634;GO:0005634;GO:0006357;GO:0008013;GO:0016055;GO:0060070;	K04490	transcription factor 7 like 1 (T cell specific, HMGbox) [Source:MGI Symbol;Acc:MGI:1202876]
MGP_C57BL6NJ_G0029735	129.217	231.212	27.222	0.117736	-3.08637	0.0130077	0.329159	5	16256625	16415451	+	7140	Sema3c	GO:0001755;GO:0001755;GO:0001755;GO:0001756;GO:0001756;GO:0001974;GO:0001974;GO:0003148;GO:0003148;GO:0003151;GO:0003151;GO:0003215;GO:0003215;GO:0003350;GO:0003350;GO:0005576;GO:0005615;GO:0005615;GO:0005615;GO:0005615;GO:0005887;GO:0007275;GO:0007399;GO:0007411;GO:0007411;GO:0007507;GO:0007507;GO:0009791;GO:0009791;GO:0021915;GO:0021915;GO:0030154;GO:0030215;GO:0030215;GO:0030215;GO:0030335;GO:…	K06840	sema domain, immunoglobulin domain (Ig), shortbasic domain, secreted, (semaphorin) 3C [Source:MGISymbol;Acc:MGI:107557]
MGP_C57BL6NJ_G0022314	144.665	275.504	13.8251	0.050181	-4.31671	0.0130164	0.329159	15	68989335	69021192	+	5518	Wisp1	GO:0001558;GO:0005178;GO:0005520;GO:0005576;GO:0005576;GO:0005578;GO:0005615;GO:0005615;GO:0005829;GO:0007155;GO:0007155;GO:0007165;GO:0007267;GO:0008201;GO:0016055;GO:0031012;GO:0048661;GO:0060548;GO:0061051;	K22471	WNT1 inducible signaling pathway protein 1[Source:MGI Symbol;Acc:MGI:1197008]
MGP_C57BL6NJ_G0024887	404.559	756.272	52.8468	0.069878	-3.83902	0.0130186	0.329159	18	62553967	62595042	+	5481	Pdgfrb	GO:0000166;GO:0004672;GO:0004713;GO:0004713;GO:0004714;GO:0004714;GO:0005019;GO:0005524;GO:0005524;GO:0005764;GO:0005886;GO:0006468;GO:0006935;GO:0007169;GO:0007275;GO:0016020;GO:0016021;GO:0016301;GO:0016310;GO:0016740;GO:0018108;GO:0031410;GO:0035791;GO:0036120;GO:0043202;GO:0048008;	K05089	platelet derived growth factor receptor, betapolypeptide [Source:MGI Symbol;Acc:MGI:97531]
MGP_C57BL6NJ_G0020437	38.7621	10.1897	67.3346	6.60811	2.72424	0.0130897	0.329159	12	108255005	108298182	-	3542	Asb2	GO:0000151;GO:0000209;GO:0000209;GO:0006511;GO:0006511;GO:0016567;GO:0016567;GO:0031466;GO:0031466;GO:0035556;GO:0035914;GO:0035914;GO:0042787;GO:0042787;GO:0045445;GO:0045445;GO:0061630;GO:0061630;	K10324	ankyrin repeat and SOCS box-containing 2[Source:MGI Symbol;Acc:MGI:1929743]
MGP_C57BL6NJ_G0024440	515.886	849.133	182.639	0.215089	-2.21699	0.0130916	0.329159	17	83956413	84145738	+	5995	Crim1	GO:0001558;GO:0004857;GO:0004867;GO:0005520;GO:0005576;GO:0010951;GO:0016020;GO:0016021;GO:0030165;GO:0043086;GO:0070062;	-	cysteine rich transmembrane BMP regulator 1(chordin like) [Source:MGI Symbol;Acc:MGI:1354756]
MGP_C57BL6NJ_G0026809	51.559	100.53	2.58787	0.0257422	-5.27972	0.0131093	0.329159	2	128320494	128326510	+	2496	Ckmt1	GO:0000166;GO:0003824;GO:0004111;GO:0004111;GO:0005515;GO:0005524;GO:0005739;GO:0005739;GO:0005739;GO:0005743;GO:0016020;GO:0016301;GO:0016301;GO:0016310;GO:0016310;GO:0016740;GO:0016772;GO:0032091;GO:0042803;GO:0043066;GO:0043204;GO:0043209;GO:0044289;GO:0070062;GO:0005739;GO:0005739;GO:0032091;GO:0043066;GO:0043209;	-	creatine kinase, mitochondrial 1, ubiquitous[Source:MGI Symbol;Acc:MGI:99441]
MGP_C57BL6NJ_G0024977	183.237	334.912	31.5611	0.094237	-3.40756	0.0131272	0.329159	18	78057233	78085754	+	4564	Smad7	GO:0000122;GO:0001650;GO:0001657;GO:0001657;GO:0002725;GO:0002725;GO:0003677;GO:0003700;GO:0005515;GO:0005515;GO:0005518;GO:0005518;GO:0005622;GO:0005634;GO:0005634;GO:0005634;GO:0005654;GO:0005654;GO:0005667;GO:0005737;GO:0005737;GO:0005813;GO:0005829;GO:0005829;GO:0005886;GO:0005913;GO:0006351;GO:0006355;GO:0006355;GO:0007179;GO:0007179;GO:0007179;GO:0008013;GO:0010717;GO:0010801;GO:0010801;GO:…	K19631	SMAD family member 7 [Source:MGISymbol;Acc:MGI:1100518]
MGP_C57BL6NJ_G0019776	52.1858	96.6058	7.76586	0.0803871	-3.63689	0.0131284	0.329159	11	123039130	123054831	+	3717	Cdr2l	GO:0003674;GO:0005575;GO:0008150;	-	cerebellar degeneration-related protein 2-like[Source:MGI Symbol;Acc:MGI:2684867]
MGP_C57BL6NJ_G0017998	26.9973	47.9545	6.04019	0.125957	-2.989	0.0131348	0.329159	10	88939029	88947621	-	1565	Mterf2	GO:0003677;GO:0003677;GO:0003690;GO:0005739;GO:0005739;GO:0005739;GO:0006351;GO:0006355;GO:0006355;GO:0006393;GO:0042645;GO:0042645;	K15031	mitochondrial transcription termination factor 2[Source:MGI Symbol;Acc:MGI:1921488]
MGP_C57BL6NJ_G0030873	149.72	284.702	14.7374	0.0517643	-4.2719	0.0131693	0.329159	6	2392986	2408102	-	3515	Pdk4	GO:0000166;GO:0004672;GO:0004672;GO:0004712;GO:0004740;GO:0004740;GO:0005524;GO:0005524;GO:0005739;GO:0005739;GO:0005739;GO:0005743;GO:0005743;GO:0005759;GO:0005975;GO:0006006;GO:0006468;GO:0006468;GO:0006885;GO:0006885;GO:0008286;GO:0008286;GO:0008286;GO:0009267;GO:0009267;GO:0010510;GO:0010510;GO:0010510;GO:0010565;GO:0010565;GO:0010906;GO:0010906;GO:0010906;GO:0016301;GO:0016310;GO:0016740;GO:…	K00898	pyruvate dehydrogenase kinase, isoenzyme 4[Source:MGI Symbol;Acc:MGI:1351481]
MGP_C57BL6NJ_G0024442	7.94246	15.8849	0	0	-Inf	0.0131736	0.329159	17	84285823	84425218	+	2720	Vit	GO:0003429;GO:0005539;GO:0005539;GO:0005539;GO:0005576;GO:0005578;GO:0005578;GO:0005578;GO:0005578;GO:0005614;GO:0005614;GO:0005614;GO:0005615;GO:0007399;GO:0010811;GO:0010811;GO:0010811;GO:0021510;GO:0021510;GO:0030198;GO:0030198;GO:0030198;GO:0031012;GO:0031012;GO:0031012;GO:0062023;	-	vitrin [Source:MGI Symbol;Acc:MGI:1921449]"
MGP_C57BL6NJ_G0016973	150.4	64.6134	236.186	3.65537	1.87002	0.0131829	0.329159	1	154146418	154180022	-	2031	Rgs18	GO:0005096;GO:0005096;GO:0005096;GO:0005737;GO:0005737;GO:0005737;GO:0005886;GO:0007186;GO:0007186;GO:0007186;GO:0008277;GO:0008277;GO:0009968;GO:0043547;	K16449	regulator of G-protein signaling 18 [Source:MGISymbol;Acc:MGI:1927498]
MGP_C57BL6NJ_G0035343	9.05414	18.1083	0	0	-Inf	0.0132077	0.329234	9	57342240	57409660	-	3925	Lingo1	GO:0005154;GO:0005154;GO:0005515;GO:0005515;GO:0005578;GO:0005615;GO:0005622;GO:0005886;GO:0007409;GO:0016020;GO:0016021;GO:0021954;GO:0031012;GO:0031175;GO:0043491;GO:0048715;	-	leucine rich repeat and Ig domain containing 1[Source:MGI Symbol;Acc:MGI:1915522]
MGP_C57BL6NJ_G0016323	14.1338	1.57296	26.6946	16.971	4.085	0.0132575	0.329929	1	36909783	36936765	+	2992	Zap70	GO:0000166;GO:0001772;GO:0001772;GO:0001784;GO:0002250;GO:0002376;GO:0004672;GO:0004672;GO:0004672;GO:0004713;GO:0004713;GO:0004713;GO:0004713;GO:0004715;GO:0004715;GO:0004715;GO:0005102;GO:0005515;GO:0005515;GO:0005515;GO:0005524;GO:0005524;GO:0005524;GO:0005524;GO:0005737;GO:0005737;GO:0005737;GO:0005829;GO:0005829;GO:0005886;GO:0005886;GO:0005886;GO:0005911;GO:0005911;GO:0006468;GO:0006468;GO:…	K07360	zeta-chain (TCR) associated protein kinase[Source:MGI Symbol;Acc:MGI:99613]
MGP_C57BL6NJ_G0020359	24.202	43.2463	5.15763	0.119262	-3.0678	0.0133418	0.331481	12	90051804	90065184	+	2605	Vash1	GO:0001525;GO:0001937;GO:0001937;GO:0003674;GO:0005576;GO:0005615;GO:0005737;GO:0005737;GO:0005737;GO:0005783;GO:0007049;GO:0007050;GO:0009611;GO:0010596;GO:0010628;GO:0016525;GO:0016525;GO:0016525;GO:0043537;GO:0045177;GO:0045765;GO:0060674;GO:0060674;GO:0060716;GO:0060716;GO:1901491;GO:2000772;	-	vasohibin 1 [Source:MGI Symbol;Acc:MGI:2442543]"
MGP_C57BL6NJ_G0028010	98.0812	177.208	18.954	0.106959	-3.22488	0.0134594	0.333549	3	99994508	100006159	-	4198	Adamtsl4	GO:0002020;GO:0002020;GO:0002064;GO:0002064;GO:0005576;GO:0005578;GO:0005578;GO:0005578;GO:0005614;GO:0005614;GO:0005615;GO:0005615;GO:0006508;GO:0006915;GO:0008233;GO:0030198;GO:0030198;GO:0031012;GO:0031012;GO:0043065;GO:0043065;	-	ADAMTS-like 4 [Source:MGI Symbol;Acc:MGI:2389008]"
MGP_C57BL6NJ_G0018602	66.0099	23.0772	108.943	4.7208	2.23903	0.0134691	0.333549	11	49364070	49374569	-	1614	Gm5431	GO:0003924;GO:0005525;GO:0005789;GO:0006952;GO:0016020;GO:0035458;	K17072	predicted gene 5431 [Source:MGISymbol;Acc:MGI:3645205]
MGP_C57BL6NJ_G0021716	64.9145	120.784	9.04492	0.074885	-3.73918	0.0135334	0.334591	14	50993501	51004518	-	3503	Ajuba	GO:0000122;GO:0000122;GO:0000932;GO:0000932;GO:0000932;GO:0001666;GO:0001666;GO:0003682;GO:0003682;GO:0003714;GO:0003714;GO:0003714;GO:0003714;GO:0005515;GO:0005515;GO:0005515;GO:0005634;GO:0005634;GO:0005634;GO:0005634;GO:0005654;GO:0005667;GO:0005667;GO:0005667;GO:0005737;GO:0005794;GO:0005815;GO:0005829;GO:0005829;GO:0005856;GO:0005886;GO:0005911;GO:0005911;GO:0005912;GO:0005925;GO:0005925;GO:…	K16682	ajuba LIM protein [Source:MGISymbol;Acc:MGI:1341886]
MGP_C57BL6NJ_G0035381	119.518	228.25	10.7855	0.0472529	-4.40345	0.0135738	0.334733	9	59185515	59216805	-	3338	Loxl1	GO:0005507;GO:0016641;GO:0055114;	K14678	lysyl oxidase-like 1 [Source:MGISymbol;Acc:MGI:106096]
MGP_C57BL6NJ_G0018704	11.448	0.878398	22.0175	25.0655	4.64763	0.013595	0.334733	11	55367746	55370142	-	800	Csf2	GO:0001821;GO:0001892;GO:0001892;GO:0005125;GO:0005125;GO:0005125;GO:0005125;GO:0005129;GO:0005576;GO:0005576;GO:0005615;GO:0005615;GO:0005615;GO:0005615;GO:0006955;GO:0008083;GO:0008083;GO:0008284;GO:0008284;GO:0010468;GO:0010468;GO:0010469;GO:0010628;GO:0010744;GO:0030223;GO:0030223;GO:0030224;GO:0030224;GO:0032747;GO:0042045;GO:0042116;GO:0042127;GO:0042127;GO:0042531;GO:0043011;GO:0043011;GO:…	K05427	colony stimulating factor 2 (granulocyte-macrophage) [Source:MGI Symbol;Acc:MGI:1339752]
MGP_C57BL6NJ_G0029718	559.564	942.219	176.909	0.187757	-2.41306	0.0136056	0.334733	5	6420496	6508779	+	9351	Abcb4	GO:0000139;GO:0000166;GO:0005524;GO:0005524;GO:0005654;GO:0005737;GO:0005737;GO:0005829;GO:0005886;GO:0005886;GO:0005886;GO:0005925;GO:0006810;GO:0006869;GO:0008525;GO:0008525;GO:0015629;GO:0016020;GO:0016020;GO:0016020;GO:0016021;GO:0016021;GO:0016324;GO:0016324;GO:0016787;GO:0016887;GO:0030136;GO:0031410;GO:0032376;GO:0032376;GO:0032782;GO:0032782;GO:0042626;GO:0042626;GO:0042626;GO:0045121;GO:…	K05659	ATP-binding cassette, sub-family B (MDR/TAP),member 4 [Source:MGI Symbol;Acc:MGI:97569]
MGP_C57BL6NJ_G0034845	128.345	239.837	16.8528	0.0702676	-3.831	0.0136477	0.335224	9	11871910	11940772	-	3748	Amotl1	GO:0003365;GO:0003365;GO:0003365;GO:0005515;GO:0005923;GO:0005923;GO:0005923;GO:0005923;GO:0008180;GO:0016055;GO:0016324;GO:0016324;GO:0030027;GO:0030027;GO:0030036;GO:0030054;GO:0030334;GO:0031410;GO:0031410;GO:0031410;GO:0035329;GO:0035329;GO:0035329;GO:0042802;GO:0043536;GO:0043536;	K06104	angiomotin-like 1 [Source:MGISymbol;Acc:MGI:1922973]
MGP_C57BL6NJ_G0028686	138.803	221.928	55.6785	0.250885	-1.9949	0.0137107	0.336223	4	47252506	47367006	+	6538	Col15a1	GO:0005198;GO:0005201;GO:0005576;GO:0005578;GO:0005581;GO:0005604;GO:0005604;GO:0005615;GO:0005615;GO:0005615;GO:0007155;GO:0007155;GO:0030020;GO:0030198;GO:0031012;GO:0031012;GO:0031012;GO:0062023;GO:0070062;GO:0005604;GO:0005615;	K08135	collagen, type XV, alpha 1 [Source:MGISymbol;Acc:MGI:88449]
MGP_C57BL6NJ_G0023257	726.212	329.07	1123.35	3.41372	1.77134	0.0137949	0.337269	16	44572471	44600731	+	2045	Cd200r4	GO:0004872;GO:0004872;GO:0005515;GO:0007165;GO:0009897;GO:0009897;GO:0009897;GO:0016020;GO:0016021;GO:0038023;GO:0038023;GO:0038023;	-	CD200 receptor 4 [Source:MGISymbol;Acc:MGI:3036289]
MGP_C57BL6NJ_G0020222	61.9582	116.539	7.37775	0.0633073	-3.98148	0.0138197	0.337269	12	75188804	75204411	-	4383	Six1	GO:0000122;GO:0001657;GO:0001658;GO:0001759;GO:0001822;GO:0003151;GO:0003682;GO:0003700;GO:0005634;GO:0005667;GO:0006355;GO:0007389;GO:0007519;GO:0007605;GO:0008582;GO:0010468;GO:0014842;GO:0021610;GO:0022008;GO:0030855;GO:0030878;GO:0030910;GO:0032880;GO:0035909;GO:0042472;GO:0042474;GO:0043066;GO:0043524;GO:0043565;GO:0043586;GO:0045664;GO:0045893;GO:0045944;GO:0048538;GO:0048665;GO:0048699;GO:…	K15614	sine oculis-related homeobox 1 [Source:MGISymbol;Acc:MGI:102780]
MGP_C57BL6NJ_G0027795	7.8849	15.7698	0	0	-Inf	0.0138778	0.337269	3	91323265	91327975	+	1322	Crabp2	GO:0001972;GO:0001972;GO:0001972;GO:0005634;GO:0005634;GO:0005634;GO:0005654;GO:0005737;GO:0005737;GO:0005737;GO:0005737;GO:0005783;GO:0005829;GO:0006810;GO:0008289;GO:0016918;GO:0019841;GO:0030332;GO:0035115;GO:0035115;GO:0042573;GO:0042573;GO:0048385;GO:0048672;GO:0048672;GO:0070062;	K17289	cellular retinoic acid binding protein II[Source:MGI Symbol;Acc:MGI:88491]
MGP_C57BL6NJ_G0017587	6.45996	0	12.9199	Inf	Inf	0.0138953	0.337269	10	42859257	42966432	+	5502	Scml4	GO:0003674;GO:0005634;GO:0005654;GO:0006351;GO:0006355;GO:0008150;	-	sex comb on midleg-like 4 (Drosophila) [Source:MGISymbol;Acc:MGI:2446140]
MGP_C57BL6NJ_G0016348	802.832	368.393	1237.27	3.35856	1.74784	0.0139208	0.337269	1	39696197	39809103	-	5239	Tbc1d8	GO:0005096;GO:0005096;GO:0005622;GO:0005622;GO:0006886;GO:0012505;GO:0017137;GO:0031338;GO:0090630;	K19951	TBC1 domain family, member 8 [Source:MGISymbol;Acc:MGI:1927225]
MGP_C57BL6NJ_G0017345	279.866	125.041	434.691	3.47639	1.79759	0.0139212	0.337269	1	204922170	204961552	-	13679	Dtl	GO:0000209;GO:0000209;GO:0004842;GO:0004842;GO:0005634;GO:0005634;GO:0005694;GO:0005730;GO:0005737;GO:0005813;GO:0005813;GO:0005815;GO:0005829;GO:0005856;GO:0006260;GO:0006511;GO:0006511;GO:0006513;GO:0006513;GO:0006974;GO:0006974;GO:0009411;GO:0009411;GO:0010971;GO:0016020;GO:0016567;GO:0019985;GO:0019985;GO:0031464;GO:0031464;GO:0031465;GO:0031465;GO:0031572;GO:0031965;GO:0045732;GO:0051726;GO:…	-	denticleless E3 ubiquitin protein ligase[Source:MGI Symbol;Acc:MGI:1924093]
MGP_C57BL6NJ_G0026705	147.695	251.834	43.5565	0.172957	-2.53152	0.013936	0.337269	2	118485252	118492880	+	2823	Lpcat4	GO:0005783;GO:0005783;GO:0005789;GO:0006629;GO:0006644;GO:0006644;GO:0008152;GO:0008654;GO:0016020;GO:0016020;GO:0016021;GO:0016740;GO:0016746;GO:0016746;GO:0047166;GO:0047184;GO:0047192;GO:0071617;	K13512	lysophosphatidylcholine acyltransferase 4[Source:MGI Symbol;Acc:MGI:2138993]
MGP_C57BL6NJ_G0034072	190.295	338.348	42.2428	0.12485	-3.00173	0.0139562	0.337269	8	46256391	46592809	+	19449	Sorbs2	GO:0003676;GO:0003723;GO:0005654;GO:0005737;GO:0005856;GO:0005886;GO:0005886;GO:0005886;GO:0005925;GO:0007015;GO:0007219;GO:0007219;GO:0014069;GO:0016020;GO:0016324;GO:0019904;GO:0030018;GO:0030027;GO:0030054;GO:0030425;GO:0042995;GO:0043025;GO:0046983;GO:0048471;GO:0061049;	-	sorbin and SH3 domain containing 2 [Source:MGISymbol;Acc:MGI:1924574]
MGP_C57BL6NJ_G0034967	117.701	228.484	6.9182	0.0302787	-5.04555	0.0139626	0.337269	9	20160962	20171496	+	2368	Cnn1	GO:0003779;GO:0003779;GO:0003779;GO:0005516;GO:0005856;GO:0005925;GO:0031032;GO:1904706;	-	calponin 1 [Source:MGI Symbol;Acc:MGI:104979]"
MGP_C57BL6NJ_G0035685	302.67	572.339	33.0008	0.0576596	-4.11629	0.0139766	0.337269	9	107494325	107609556	+	13523	Slco2a1	GO:0015132;GO:0015732;	K14345	solute carrier organic anion transporter family,member 2a1 [Source:MGI Symbol;Acc:MGI:1346021]
MGP_C57BL6NJ_G0023993	9.75739	19.5148	0	0	-Inf	0.0140533	0.338578	17	36081758	36233660	+	10985	Tnxb	GO:0005201;GO:0005518;GO:0005576;GO:0005578;GO:0005578;GO:0005583;GO:0005615;GO:0005622;GO:0006629;GO:0006631;GO:0006641;GO:0007160;GO:0008201;GO:0030198;GO:0030198;GO:0030199;GO:0030199;GO:0031012;GO:0032963;GO:0043506;GO:0048251;GO:0062023;GO:0062023;GO:0070062;GO:0098609;GO:0005518;GO:0005576;GO:0005578;GO:0005615;GO:0006629;GO:0006631;GO:0006641;GO:0007160;GO:0008201;GO:0030198;GO:0030199;GO:…	K06252	tenascin XB [Source:MGI Symbol;Acc:MGI:1932137]"
MGP_C57BL6NJ_G0030070	210.858	86.6239	335.093	3.86836	1.95172	0.0141988	0.34154	5	79160881	79210489	-	9030	Kdr	GO:0000166;GO:0004672;GO:0004713;GO:0004713;GO:0004714;GO:0005021;GO:0005524;GO:0005524;GO:0006468;GO:0007169;GO:0016020;GO:0016021;GO:0016021;GO:0016301;GO:0016310;GO:0016740;GO:0018108;GO:0019838;GO:0038084;GO:0048010;	K05098	kinase insert domain protein receptor [Source:MGISymbol;Acc:MGI:96683]
MGP_C57BL6NJ_G0025970	91.9651	164.934	18.9966	0.115177	-3.11807	0.014246	0.341637	2	29185946	29204447	+	4546	Pkn3	GO:0000166;GO:0004672;GO:0004674;GO:0004674;GO:0004674;GO:0004697;GO:0005524;GO:0005524;GO:0005622;GO:0005634;GO:0005737;GO:0006468;GO:0007165;GO:0010631;GO:0016301;GO:0016310;GO:0016740;GO:0017049;GO:0018105;GO:0035556;GO:0048471;	K06071	protein kinase N3 [Source:MGISymbol;Acc:MGI:2388285]
MGP_C57BL6NJ_G0036117	7.78596	15.5719	0	0	-Inf	0.0142553	0.341637	X	18592537	18747417	-	3928	Klhl13	GO:0000910;GO:0004842;GO:0004842;GO:0004842;GO:0007049;GO:0016567;GO:0016567;GO:0030496;GO:0031463;GO:0031463;GO:0031463;GO:0032465;GO:0032465;GO:0051301;	K10447	kelch-like 13 [Source:MGI Symbol;Acc:MGI:1914705]"
MGP_C57BL6NJ_G0025395	765.618	359.657	1171.58	3.25748	1.70376	0.0142707	0.341637	19	20093118	20177179	-	5997	Gda	GO:0005515;GO:0006147;GO:0006147;GO:0008270;GO:0008270;GO:0008892;GO:0008892;GO:0008892;GO:0008892;GO:0016787;GO:0016787;GO:0016810;GO:0031116;GO:0046098;GO:0046872;GO:0070062;	K01487	guanine deaminase [Source:MGISymbol;Acc:MGI:95678]
MGP_C57BL6NJ_G0022693	175.473	331.419	19.5273	0.0589203	-4.08509	0.0143743	0.343438	15	103346233	103375456	-	6001	Col2a1	GO:0001501;GO:0001501;GO:0001502;GO:0001502;GO:0001503;GO:0001503;GO:0001894;GO:0001894;GO:0001958;GO:0001958;GO:0002062;GO:0002062;GO:0002062;GO:0003007;GO:0003007;GO:0005201;GO:0005201;GO:0005576;GO:0005576;GO:0005578;GO:0005578;GO:0005578;GO:0005581;GO:0005581;GO:0005581;GO:0005581;GO:0005585;GO:0005585;GO:0005585;GO:0005604;GO:0005604;GO:0005615;GO:0005615;GO:0005615;GO:0005737;GO:0005737;GO:…	K19719	collagen, type II, alpha 1 [Source:MGISymbol;Acc:MGI:88452]
MGP_C57BL6NJ_G0033583	69.6085	131.409	7.8082	0.0594192	-4.07293	0.0143986	0.343438	7	139863465	139977551	-	6865	Fgfr2	GO:0000166;GO:0004672;GO:0004713;GO:0004713;GO:0004714;GO:0005007;GO:0005524;GO:0005524;GO:0006468;GO:0008284;GO:0008543;GO:0016020;GO:0016021;GO:0016021;GO:0016301;GO:0016310;GO:0016740;GO:0018108;	-	fibroblast growth factor receptor 2 [Source:MGISymbol;Acc:MGI:95523]
MGP_C57BL6NJ_G0028969	10.6032	20.7802	0.426248	0.0205122	-5.60737	0.0144141	0.343438	4	112626659	112644187	-	4241	Podn	GO:0004860;GO:0005518;GO:0005576;GO:0005578;GO:0005615;GO:0005737;GO:0005737;GO:0006469;GO:0008285;GO:0019221;GO:0030336;GO:0030336;GO:0031012;GO:0046426;	-	podocan [Source:MGI Symbol;Acc:MGI:2674939]"
MGP_C57BL6NJ_G0018441	419.356	785.057	53.6549	0.0683453	-3.87101	0.0144523	0.343806	11	9551231	9662406	-	8833	Grb10	GO:0001784;GO:0005070;GO:0005070;GO:0005070;GO:0005070;GO:0005158;GO:0005158;GO:0005158;GO:0005158;GO:0005515;GO:0005515;GO:0005515;GO:0005737;GO:0005829;GO:0007165;GO:0007165;GO:0008286;GO:0009967;GO:0030178;GO:0030178;GO:0030178;GO:0030949;GO:0030949;GO:0032868;GO:0032991;GO:0042326;GO:0042326;GO:0042327;GO:0042802;GO:0043234;GO:0045719;GO:0045719;GO:0046325;GO:0046325;GO:0046627;GO:0046627;GO:…	K20064	growth factor receptor bound protein 10 [Source:MGISymbol;Acc:MGI:103232]
MGP_C57BL6NJ_G0023024	12.8658	24.4345	1.29716	0.0530873	-4.23549	0.0147071	0.348577	16	15841528	15907125	+	6514	Arvcf	GO:0005515;GO:0005634;GO:0005634;GO:0005634;GO:0005737;GO:0005737;GO:0005737;GO:0005886;GO:0005886;GO:0005886;GO:0005911;GO:0005913;GO:0007043;GO:0007155;GO:0007275;GO:0016339;GO:0016339;GO:0045296;GO:0098609;GO:0098609;GO:0005634;GO:0005737;GO:0005886;	-	armadillo repeat gene deleted in velo-cardio-facialsyndrome [Source:MGI Symbol;Acc:MGI:109620]
MGP_C57BL6NJ_G0018988	260.593	115.036	406.151	3.53065	1.81993	0.0147181	0.348577	11	73133598	73139857	+	3899	Zmynd15	GO:0005634;GO:0005634;GO:0005737;GO:0005737;GO:0006351;GO:0006355;GO:0007283;GO:0007286;GO:0030154;GO:0042826;GO:0045892;GO:0046872;GO:0005634;GO:0005737;GO:0007286;GO:0042826;GO:0045892;	-	zinc finger, MYND-type containing 15 [Source:MGISymbol;Acc:MGI:3603821]
MGP_C57BL6NJ_G0028696	141.102	247.926	34.277	0.138255	-2.8546	0.0147221	0.348577	4	48708329	48803510	+	2549	Tmeff1	GO:0005886;GO:0007275;GO:0016020;GO:0016021;	-	transmembrane protein with EGF-like and twofollistatin-like domains 1 [Source:MGISymbol;Acc:MGI:1926810]
MGP_C57BL6NJ_G0035474	6652.44	3270.45	10034.4	3.06821	1.6174	0.0148663	0.351441	9	68542257	68622086	-	4743	Rab8b	GO:0000166;GO:0003924;GO:0003924;GO:0005102;GO:0005515;GO:0005525;GO:0005525;GO:0005654;GO:0005739;GO:0005739;GO:0005768;GO:0005778;GO:0005886;GO:0005886;GO:0005886;GO:0006810;GO:0006886;GO:0006904;GO:0008021;GO:0009306;GO:0015031;GO:0016020;GO:0016604;GO:0017157;GO:0019003;GO:0019003;GO:0019882;GO:0030140;GO:0030667;GO:0030670;GO:0030911;GO:0031346;GO:0031410;GO:0031410;GO:0032482;GO:0032869;GO:…	K07902	RAB8B, member RAS oncogene family [Source:MGISymbol;Acc:MGI:2442982]
MGP_C57BL6NJ_G0026304	592.231	921.229	263.234	0.285742	-1.80722	0.0149375	0.352572	2	83470184	83558999	-	4964	Nckap1	GO:0000902;GO:0001701;GO:0001726;GO:0001756;GO:0001843;GO:0005515;GO:0005515;GO:0005737;GO:0005886;GO:0005925;GO:0007354;GO:0007492;GO:0008078;GO:0010172;GO:0010592;GO:0010592;GO:0016020;GO:0016021;GO:0016477;GO:0016601;GO:0030027;GO:0030027;GO:0030031;GO:0030032;GO:0030838;GO:0030866;GO:0030903;GO:0030950;GO:0031209;GO:0031209;GO:0031258;GO:0031941;GO:0032403;GO:0032880;GO:0035050;GO:0042074;GO:…	K05750	NCK-associated protein 1 [Source:MGISymbol;Acc:MGI:1355333]
MGP_C57BL6NJ_G0019214	155.842	292.617	19.0661	0.0651572	-3.93993	0.0149667	0.35271	11	85787932	85789745	+	801	Ccl7	GO:0002548;GO:0005125;GO:0005576;GO:0005576;GO:0005615;GO:0005615;GO:0005615;GO:0005615;GO:0006935;GO:0006954;GO:0006954;GO:0006955;GO:0007186;GO:0008009;GO:0008009;GO:0008201;GO:0010469;GO:0030593;GO:0031727;GO:0031727;GO:0043547;GO:0048020;GO:0048245;GO:0048247;GO:0070098;GO:0070374;GO:0071346;GO:0071347;GO:0071356;GO:0071361;	K05509	chemokine (C-C motif) ligand 7 [Source:MGISymbol;Acc:MGI:99512]
MGP_C57BL6NJ_G0017209	1082.18	510.509	1653.85	3.2396	1.69582	0.0150575	0.353922	1	185258101	185386443	+	3501	Aim2	GO:0002218;GO:0002218;GO:0002218;GO:0002230;GO:0002230;GO:0002376;GO:0003677;GO:0003690;GO:0003690;GO:0003690;GO:0005515;GO:0005634;GO:0005654;GO:0005737;GO:0005737;GO:0005737;GO:0005739;GO:0005829;GO:0005829;GO:0006915;GO:0006954;GO:0032088;GO:0032461;GO:0032731;GO:0032731;GO:0032731;GO:0033209;GO:0035458;GO:0035458;GO:0035690;GO:0042802;GO:0042802;GO:0042802;GO:0045087;GO:0050702;GO:0050718;GO:…	K12966	absent in melanoma 2 [Source:MGISymbol;Acc:MGI:2686159]
MGP_C57BL6NJ_G0028217	96.4739	183.457	9.49057	0.0517318	-4.27281	0.015065	0.353922	3	120084719	120303809	+	12728	Col11a1	GO:0001502;GO:0001502;GO:0002063;GO:0002063;GO:0003007;GO:0003007;GO:0003674;GO:0005201;GO:0005201;GO:0005576;GO:0005578;GO:0005578;GO:0005578;GO:0005581;GO:0005581;GO:0005581;GO:0005592;GO:0005592;GO:0005615;GO:0005615;GO:0005615;GO:0006029;GO:0006029;GO:0007601;GO:0007605;GO:0008201;GO:0030020;GO:0030198;GO:0030199;GO:0030199;GO:0031012;GO:0031012;GO:0031012;GO:0035989;GO:0035989;GO:0042472;GO:…	K19721	collagen, type XI, alpha 1 [Source:MGISymbol;Acc:MGI:88446]
MGP_C57BL6NJ_G0021686	106.791	189.843	23.7403	0.125053	-2.99939	0.0150937	0.354046	14	48028574	48053338	+	10364	Arhgef40	GO:0003674;GO:0005085;GO:0005089;GO:0005575;GO:0005737;GO:0008150;GO:0035023;GO:0065009;	-	Rho guanine nucleotide exchange factor (GEF) 40[Source:MGI Symbol;Acc:MGI:2685515]
MGP_C57BL6NJ_G0022655	42.7093	80.2148	5.20385	0.064874	-3.94622	0.0151506	0.354829	15	95567897	95710457	-	6474	Kif21a	GO:0000166;GO:0003774;GO:0003777;GO:0003777;GO:0005524;GO:0005524;GO:0005737;GO:0005829;GO:0005856;GO:0005871;GO:0005874;GO:0005874;GO:0005886;GO:0007018;GO:0007018;GO:0008017;GO:0008017;GO:0016887;GO:0030424;GO:0030425;GO:0042995;	-	kinesin family member 21A [Source:MGISymbol;Acc:MGI:109188]
MGP_C57BL6NJ_G0017015	48.0997	93.2156	2.98373	0.0320089	-4.96538	0.0151969	0.355363	1	165633612	165667356	-	7856	BC034090	-	-	cDNA sequence BC034090 [Source:MGISymbol;Acc:MGI:2672904]
MGP_C57BL6NJ_G0027782	43.7425	13.3388	74.1461	5.55868	2.47474	0.0153818	0.359131	3	90764722	90831801	+	3480	Fcrl5	GO:0005515;GO:0005886;GO:0005886;GO:0005886;GO:0009986;GO:0016020;GO:0016021;GO:0043235;GO:0050859;GO:0050859;GO:0051280;GO:0051280;	K06727	Fc receptor-like 5 [Source:MGISymbol;Acc:MGI:3053558]
MGP_C57BL6NJ_G0032140	601.176	1124.99	77.3607	0.0687655	-3.86217	0.0154407	0.359803	7	14333278	14353916	-	5102	Ehd2	GO:0000166;GO:0005509;GO:0005515;GO:0005524;GO:0005525;GO:0005737;GO:0005768;GO:0005829;GO:0005829;GO:0005886;GO:0005886;GO:0005886;GO:0005901;GO:0005901;GO:0005901;GO:0006897;GO:0006897;GO:0010008;GO:0015630;GO:0016020;GO:0016020;GO:0016020;GO:0016787;GO:0019898;GO:0019898;GO:0019904;GO:0019904;GO:0030036;GO:0030866;GO:0030866;GO:0032456;GO:0032456;GO:0032456;GO:0042802;GO:0042802;GO:0045171;GO:…	K12469	EH-domain containing 2 [Source:MGISymbol;Acc:MGI:2154274]
MGP_C57BL6NJ_G0022881	74.4115	133.26	15.5634	0.11679	-3.09801	0.0154802	0.359803	16	1157000	1205358	+	4338	Glis2	GO:0000122;GO:0000122;GO:0000122;GO:0000977;GO:0000977;GO:0000977;GO:0000981;GO:0001077;GO:0001077;GO:0001822;GO:0001822;GO:0003676;GO:0003677;GO:0003677;GO:0003677;GO:0003700;GO:0005515;GO:0005515;GO:0005634;GO:0005634;GO:0005634;GO:0005634;GO:0005634;GO:0005667;GO:0005737;GO:0005737;GO:0005737;GO:0006351;GO:0006355;GO:0006357;GO:0006366;GO:0007275;GO:0007399;GO:0016607;GO:0016607;GO:0030154;GO:…	K09233	GLIS family zinc finger 2 [Source:MGISymbol;Acc:MGI:1932535]
MGP_C57BL6NJ_G0023193	440.866	682.485	199.247	0.291943	-1.77624	0.015482	0.359803	16	35149323	35178101	-	635	Fam162a	GO:0003674;GO:0005739;GO:0005739;GO:0005739;GO:0005829;GO:0006915;GO:0006919;GO:0006919;GO:0016020;GO:0016021;GO:0043065;GO:0043065;GO:0043065;GO:0051402;GO:0051402;GO:0051402;GO:0070062;GO:0071456;GO:0071456;GO:0071456;GO:0090200;GO:0090200;GO:0090200;	-	family with sequence similarity 162, member A[Source:MGI Symbol;Acc:MGI:1917436]
MGP_C57BL6NJ_G0034199	91.1573	148.042	34.2727	0.231507	-2.11087	0.0156563	0.363294	8	73309684	73318191	+	2425	Comp	GO:0001968;GO:0001968;GO:0002020;GO:0002020;GO:0002020;GO:0002020;GO:0003417;GO:0003417;GO:0003417;GO:0005201;GO:0005201;GO:0005499;GO:0005499;GO:0005509;GO:0005509;GO:0005509;GO:0005515;GO:0005518;GO:0005518;GO:0005576;GO:0005576;GO:0005576;GO:0005578;GO:0005615;GO:0005615;GO:0005615;GO:0006915;GO:0007155;GO:0007155;GO:0008201;GO:0008201;GO:0008201;GO:0010259;GO:0010259;GO:0010260;GO:0010260;GO:…	K04659	cartilage oligomeric matrix protein [Source:MGISymbol;Acc:MGI:88469]
MGP_C57BL6NJ_G0030988	403.735	626.433	181.037	0.288997	-1.79088	0.0157465	0.363767	6	30928444	31386555	-	14106	Plxna4	GO:0002116;GO:0005515;GO:0005515;GO:0005886;GO:0005886;GO:0005886;GO:0005887;GO:0007162;GO:0007165;GO:0007399;GO:0007399;GO:0007411;GO:0007411;GO:0008045;GO:0008045;GO:0008360;GO:0016020;GO:0016021;GO:0017154;GO:0017154;GO:0017154;GO:0017154;GO:0021602;GO:0021602;GO:0021610;GO:0021610;GO:0021612;GO:0021612;GO:0021615;GO:0021615;GO:0021636;GO:0021636;GO:0021637;GO:0021637;GO:0021644;GO:0021644;GO:…	K06820	plexin A4 [Source:MGI Symbol;Acc:MGI:2179061]"
MGP_C57BL6NJ_G0023250	9.04848	0.433698	17.6633	40.7272	5.34792	0.0158001	0.363767	16	43970346	44067888	-	5623	Sidt1	GO:0003723;GO:0003725;GO:0005575;GO:0008150;GO:0016020;GO:0016021;GO:0016021;GO:0033227;GO:0051033;	-	SID1 transmembrane family, member 1 [Source:MGISymbol;Acc:MGI:2443155]
MGP_C57BL6NJ_G0034136	22.5314	43.3256	1.73731	0.040099	-4.64029	0.0158225	0.363767	8	66397757	66610340	-	4928	Tll1	GO:0004222;GO:0004222;GO:0005509;GO:0006508;GO:0006508;GO:0008233;GO:0008237;GO:0008237;GO:0008270;GO:0016787;GO:0046872;	K09608	tolloid-like [Source:MGI Symbol;Acc:MGI:106923]"
MGP_C57BL6NJ_G0024531	291.336	456.307	126.366	0.276931	-1.8524	0.015857	0.363767	18	1609250	1652441	+	6730	9430020K01Rik	GO:0003674;GO:0005911;GO:0005911;GO:0005911;GO:0005911;GO:0005912;GO:0005912;GO:0005912;GO:0007155;GO:0030054;GO:0030054;GO:0030054;GO:0032587;GO:0032587;GO:0043410;GO:0048471;GO:0090050;GO:1900748;GO:1903589;GO:1903589;GO:1903672;GO:1903672;	-	RIKEN cDNA 9430020K01 gene [Source:MGISymbol;Acc:MGI:2685174]
MGP_C57BL6NJ_G0031603	55.4232	20.33	90.5164	4.45235	2.15457	0.0158656	0.363767	6	121977544	122055017	+	3220	Zfand4	GO:0008270;GO:0046872;	K12163	zinc finger, AN1-type domain 4 [Source:MGISymbol;Acc:MGI:1914742]
MGP_C57BL6NJ_G0029407	1695.31	3174.57	216.046	0.0680552	-3.87715	0.0158658	0.363767	4	145106535	145219771	+	14307	Hspg2	GO:0005509;	K06255	perlecan (heparan sulfate proteoglycan 2)[Source:MGI Symbol;Acc:MGI:96257]
MGP_C57BL6NJ_G0027648	239.25	451.275	27.224	0.0603268	-4.05106	0.0158999	0.363767	3	58328682	58454060	-	4764	Wwtr1	GO:0000122;GO:0001649;GO:0001894;GO:0001933;GO:0003015;GO:0003713;GO:0003713;GO:0003714;GO:0005515;GO:0005515;GO:0005515;GO:0005634;GO:0005634;GO:0005654;GO:0005654;GO:0005667;GO:0005737;GO:0005737;GO:0005829;GO:0006351;GO:0006355;GO:0006355;GO:0006469;GO:0008284;GO:0010718;GO:0016567;GO:0016604;GO:0017145;GO:0031146;GO:0032835;GO:0035264;GO:0035329;GO:0035414;GO:0042803;GO:0045599;GO:0045944;GO:…	K16820	WW domain containing transcription regulator 1[Source:MGI Symbol;Acc:MGI:1917649]
MGP_C57BL6NJ_G0031789	6.25282	0	12.5056	Inf	Inf	0.0159106	0.363767	6	136747813	136755712	+	3474	Klre1	GO:0002223;GO:0002223;GO:0002859;GO:0004888;GO:0004888;GO:0005886;GO:0005887;GO:0005887;GO:0009897;GO:0009897;GO:0009986;GO:0016020;GO:0016021;GO:0019903;GO:0030101;GO:0030101;GO:0030246;GO:0032729;GO:0032729;GO:0042803;GO:0045954;GO:0045954;GO:0046983;GO:0046983;	-	killer cell lectin-like receptor family E member 1[Source:MGI Symbol;Acc:MGI:2662547]
MGP_C57BL6NJ_G0027466	12.6165	24.3682	0.864774	0.0354878	-4.81653	0.0159364	0.363767	3	4730046	4814842	+	3721	Pkia	GO:0000122;GO:0004860;GO:0004862;GO:0004862;GO:0004862;GO:0005515;GO:0005634;GO:0005634;GO:0005737;GO:0005737;GO:0006469;GO:0006469;GO:0010389;GO:0034236;GO:0034236;GO:0042308;GO:0043086;GO:0071901;GO:2000480;GO:2000480;GO:0000122;GO:0004862;GO:0005634;GO:0005737;GO:0006469;GO:0010389;GO:0034236;GO:0042308;GO:0043086;	-	protein kinase inhibitor, alpha [Source:MGISymbol;Acc:MGI:104747]
MGP_C57BL6NJ_G0030428	65.0164	123.096	6.93728	0.0563569	-4.14926	0.0159398	0.363767	5	127587314	127603408	+	6498	Tbx3	GO:0001085;GO:0001102;GO:0001568;GO:0001701;GO:0001947;GO:0003007;GO:0003151;GO:0003167;GO:0003700;GO:0005634;GO:0007569;GO:0010159;GO:0019827;GO:0021761;GO:0030857;GO:0030879;GO:0035050;GO:0035108;GO:0035116;GO:0042127;GO:0042733;GO:0045892;GO:0045893;GO:0055007;GO:0060021;GO:0060412;GO:0060444;GO:0060596;GO:0060923;GO:0060931;GO:2000648;	K10177	T-box 3 [Source:MGI Symbol;Acc:MGI:98495]"
MGP_C57BL6NJ_G0026568	16.395	31.9294	0.860575	0.0269525	-5.21344	0.0159416	0.363767	2	95835660	95844367	+	4327	Pacsin3	GO:0005515;GO:0005515;GO:0005543;GO:0005737;GO:0005737;GO:0005737;GO:0005768;GO:0005829;GO:0005856;GO:0005886;GO:0005886;GO:0005886;GO:0006897;GO:0007010;GO:0008092;GO:0008092;GO:0008289;GO:0008289;GO:0016020;GO:0016301;GO:0016310;GO:0019855;GO:0045806;GO:0045806;GO:0051044;GO:0051926;GO:0065009;GO:0070062;GO:0097320;GO:0097320;GO:0097320;GO:0097320;GO:0005737;GO:0008092;GO:0008289;GO:0019855;GO:…	-	protein kinase C and casein kinase substrate inneurons 3 [Source:MGI Symbol;Acc:MGI:1891410]
MGP_C57BL6NJ_G0026591	31.1854	54.197	8.17369	0.150814	-2.72916	0.0159974	0.36449	2	97267410	97288102	+	2658	Chst1	GO:0000139;GO:0000139;GO:0001517;GO:0005794;GO:0005802;GO:0005975;GO:0005975;GO:0006012;GO:0006044;GO:0006790;GO:0006790;GO:0006954;GO:0008146;GO:0008146;GO:0016020;GO:0016021;GO:0016021;GO:0016740;GO:0042339;GO:0042339;GO:0045130;GO:0045130;GO:0045130;	K01022	carbohydrate (keratan sulfate Gal-6)sulfotransferase 1 [Source:MGI Symbol;Acc:MGI:1924219]
MGP_C57BL6NJ_G0033643	386.586	594.718	178.454	0.300065	-1.73665	0.0160279	0.364636	7	149581479	149601445	+	2640	Pwwp2b	GO:0003674;GO:0005654;GO:0008150;	-	PWWP domain containing 2B [Source:MGISymbol;Acc:MGI:2142008]
MGP_C57BL6NJ_G0032850	23.9682	5.18304	42.7534	8.24872	3.04417	0.0161656	0.366571	7	76608253	76862871	-	12354	Mctp2	GO:0005509;GO:0005509;GO:0005654;GO:0005783;GO:0005829;GO:0007275;GO:0008150;GO:0016020;GO:0016020;GO:0016021;GO:0016021;GO:0016021;GO:0016021;GO:0030672;	-	multiple C2 domains, transmembrane 2 [Source:MGISymbol;Acc:MGI:2685335]
MGP_C57BL6NJ_G0021774	47.9897	84.3252	11.6541	0.138205	-2.85512	0.0161671	0.366571	14	52369945	52379082	+	4013	Nfatc4	GO:0000122;GO:0000122;GO:0000122;GO:0000978;GO:0000978;GO:0000978;GO:0000981;GO:0000981;GO:0001078;GO:0001078;GO:0001227;GO:0001569;GO:0001569;GO:0001816;GO:0003677;GO:0003677;GO:0003677;GO:0003677;GO:0003682;GO:0003700;GO:0003700;GO:0003700;GO:0003700;GO:0003700;GO:0005515;GO:0005515;GO:0005634;GO:0005634;GO:0005634;GO:0005634;GO:0005667;GO:0005667;GO:0005667;GO:0005737;GO:0005737;GO:0005829;GO:…	K17334	nuclear factor of activated T cells, cytoplasmic,calcineurin dependent 4 [Source:MGISymbol;Acc:MGI:1920431]
MGP_C57BL6NJ_G0025994	102.253	192.795	11.7107	0.0607418	-4.04117	0.0161858	0.366571	2	30069884	30115960	+	1961	Prrx2	GO:0003677;GO:0003677;GO:0005634;GO:0006355;GO:0007275;GO:0043565;	-	paired related homeobox 2 [Source:MGISymbol;Acc:MGI:98218]
MGP_C57BL6NJ_G0023356	7.49624	14.9925	0	0	-Inf	0.0163238	0.36904	16	64865403	65212209	-	5660	Epha3	GO:0000166;GO:0004672;GO:0004713;GO:0004713;GO:0005003;GO:0005524;GO:0005524;GO:0005887;GO:0006468;GO:0007169;GO:0016020;GO:0016021;GO:0016021;GO:0016301;GO:0016310;GO:0016740;	K05104	Eph receptor A3 [Source:MGI Symbol;Acc:MGI:99612]"
MGP_C57BL6NJ_G0028097	261.671	493.815	29.5265	0.0597927	-4.06389	0.0163437	0.36904	3	107528888	107579819	+	1469	Ngf	GO:0001934;GO:0001934;GO:0004857;GO:0005057;GO:0005102;GO:0005163;GO:0005163;GO:0005576;GO:0005576;GO:0005615;GO:0005615;GO:0005615;GO:0005788;GO:0007169;GO:0007171;GO:0007422;GO:0007422;GO:0007613;GO:0007613;GO:0007623;GO:0008021;GO:0008083;GO:0008083;GO:0008191;GO:0008191;GO:0008284;GO:0008344;GO:0008625;GO:0010466;GO:0010469;GO:0010628;GO:0010628;GO:0010951;GO:0010976;GO:0010976;GO:0014042;GO:…	K02582	nerve growth factor [Source:MGISymbol;Acc:MGI:97321]
MGP_C57BL6NJ_G0026244	20.6247	39.512	1.73731	0.0439692	-4.50736	0.0164752	0.37107	2	73822234	73825580	-	2855	Dlx2	GO:0000122;GO:0000122;GO:0000977;GO:0000977;GO:0001228;GO:0001228;GO:0003677;GO:0003677;GO:0003677;GO:0003677;GO:0003682;GO:0003682;GO:0003727;GO:0003727;GO:0005515;GO:0005515;GO:0005634;GO:0005634;GO:0005634;GO:0006351;GO:0006355;GO:0006355;GO:0006357;GO:0006357;GO:0006366;GO:0007275;GO:0009954;GO:0009954;GO:0021544;GO:0021544;GO:0021766;GO:0021766;GO:0021772;GO:0021772;GO:0021879;GO:0021879;GO:…	K18488	distal-less homeobox 2 [Source:MGISymbol;Acc:MGI:94902]
MGP_C57BL6NJ_G0024909	18.5994	37.1988	0	0	-Inf	0.0164827	0.37107	18	64588211	64619692	+	2799	Apcdd1	GO:0001942;GO:0005886;GO:0005887;GO:0005887;GO:0016020;GO:0016021;GO:0016055;GO:0017147;GO:0017147;GO:0030178;GO:0030178;GO:0042802;GO:0043615;GO:0043615;	-	adenomatosis polyposis coli down-regulated 1[Source:MGI Symbol;Acc:MGI:3513977]
MGP_C57BL6NJ_G0019101	1149.82	2162.06	137.592	0.0636395	-3.97393	0.0165697	0.372172	11	78530748	78545376	-	2359	Serpinf1	GO:0004867;GO:0005576;GO:0005576;GO:0005576;GO:0005604;GO:0005615;GO:0005615;GO:0005615;GO:0005615;GO:0005615;GO:0007614;GO:0010596;GO:0010629;GO:0010951;GO:0010951;GO:0010976;GO:0016525;GO:0016525;GO:0016525;GO:0016525;GO:0030424;GO:0031012;GO:0042470;GO:0043025;GO:0043203;GO:0048471;GO:0050728;GO:0050769;GO:0050769;GO:0050769;GO:0060770;GO:0060770;GO:0070062;GO:1901215;	K19614	serine (or cysteine) peptidase inhibitor, clade F,member 1 [Source:MGI Symbol;Acc:MGI:108080]
MGP_C57BL6NJ_G0022088	233.694	427.941	39.4462	0.0921768	-3.43945	0.016581	0.372172	15	213640	502525	-	9053	Ghr	GO:0000187;GO:0000255;GO:0004896;GO:0004896;GO:0004903;GO:0004903;GO:0005515;GO:0005576;GO:0005576;GO:0005615;GO:0005615;GO:0005634;GO:0005737;GO:0005739;GO:0005829;GO:0005829;GO:0005886;GO:0005886;GO:0005886;GO:0005887;GO:0006101;GO:0006103;GO:0006105;GO:0006107;GO:0006549;GO:0006573;GO:0006600;GO:0006631;GO:0006897;GO:0007259;GO:0009755;GO:0009897;GO:0009986;GO:0016020;GO:0016020;GO:0016021;GO:…	K05080	growth hormone receptor [Source:MGISymbol;Acc:MGI:95708]
MGP_C57BL6NJ_G0032681	133.963	251.465	16.4605	0.0654583	-3.93328	0.0166427	0.373004	7	47585774	47595156	-	1453	Rcn3	GO:0005509;GO:0005509;GO:0005509;GO:0005783;GO:0005783;GO:0005783;GO:0005788;GO:0008150;GO:0009306;GO:0010952;GO:0015031;GO:0015031;GO:0032964;GO:0036503;GO:0036503;GO:0043129;GO:0043129;GO:0046872;GO:0055091;GO:0055091;GO:0060428;GO:0060428;	-	reticulocalbin 3, EF-hand calcium binding domain[Source:MGI Symbol;Acc:MGI:1277122]
MGP_C57BL6NJ_G0031781	8586.39	4125.31	13047.5	3.16278	1.66119	0.0169041	0.378301	6	136500198	136526696	+	5428	Clec12a	GO:0016020;GO:0016021;GO:0030246;	-	C-type lectin domain family 12, member a[Source:MGI Symbol;Acc:MGI:3040968]
MGP_C57BL6NJ_G0029710	229.796	458.724	0.868656	0.00189364	-9.04463	0.0169881	0.37962	5	5397689	5421287	+	3155	Steap4	GO:0000139;GO:0005768;GO:0005768;GO:0005768;GO:0005768;GO:0005794;GO:0005794;GO:0005886;GO:0005886;GO:0005886;GO:0005886;GO:0005887;GO:0006810;GO:0006811;GO:0008823;GO:0008823;GO:0008823;GO:0015677;GO:0015677;GO:0015677;GO:0016020;GO:0016021;GO:0016491;GO:0031901;GO:0045444;GO:0045444;GO:0046872;GO:0052851;GO:0052851;GO:0052851;GO:0055072;GO:0055114;GO:0055114;GO:0055114;GO:0055114;GO:0070062;GO:…	K19876	STEAP family member 4 [Source:MGISymbol;Acc:MGI:1923560]
MGP_C57BL6NJ_G0024317	7.43039	14.8608	0	0	-Inf	0.0170141	0.379638	17	60032403	60039984	-	3705	Plin4	GO:0005737;GO:0005811;GO:0005811;GO:0005811;GO:0005829;GO:0005829;GO:0005886;GO:0005886;GO:0005886;GO:0005886;GO:0016020;GO:0043231;GO:0043231;	K20254	perilipin 4 [Source:MGI Symbol;Acc:MGI:1929709]"
MGP_C57BL6NJ_G0030847	274.52	129.062	419.978	3.25407	1.70225	0.0171212	0.381153	5	162171017	162224290	+	13186	Brca2	GO:0000722;GO:0000724;GO:0001556;GO:0001833;GO:0005634;GO:0005737;GO:0006302;GO:0006974;GO:0006978;GO:0007141;GO:0007283;GO:0007420;GO:0007569;GO:0008283;GO:0008585;GO:0008630;GO:0010165;GO:0010225;GO:0010332;GO:0030097;GO:0032465;GO:0042771;GO:0043009;GO:0045931;GO:0048478;GO:0051276;GO:0070200;	K08775	breast cancer 2, early onset [Source:MGISymbol;Acc:MGI:109337]
MGP_C57BL6NJ_G0032302	735.938	357.972	1113.9	3.1117	1.6377	0.0171325	0.381153	7	24300711	24354813	-	14797	-	-	-	-
MGP_C57BL6NJ_G0016594	8.74114	17.4823	0	0	-Inf	0.0172426	0.382491	1	82657434	82660704	+	2657	Kcne4	GO:0005244;GO:0005249;GO:0005267;GO:0005267;GO:0006810;GO:0006811;GO:0006811;GO:0006813;GO:0008076;GO:0016020;GO:0016020;GO:0016021;GO:0016324;GO:0034765;GO:0034765;GO:0044325;GO:0071805;GO:0071805;	K04898	potassium voltage-gated channel, Isk-relatedsubfamily, gene 4 [Source:MGI Symbol;Acc:MGI:1891125]
MGP_C57BL6NJ_G0019208	38.4884	65.696	11.2809	0.171713	-2.54193	0.0172444	0.382491	11	84494445	84506337	+	1633	Tmem98	GO:0003674;GO:0005783;GO:0005783;GO:0008150;GO:0016020;GO:0016021;	-	transmembrane protein 98 [Source:MGISymbol;Acc:MGI:1923457]
MGP_C57BL6NJ_G0016387	2925.28	1421.23	4429.33	3.11655	1.63995	0.017276	0.382491	1	46869053	46888658	-	9000	Slc40a1	GO:0002260;GO:0002260;GO:0003158;GO:0003158;GO:0004872;GO:0004872;GO:0005381;GO:0005381;GO:0005381;GO:0005515;GO:0005515;GO:0005622;GO:0005654;GO:0005829;GO:0005886;GO:0005886;GO:0005886;GO:0006810;GO:0006811;GO:0006826;GO:0006826;GO:0006879;GO:0008021;GO:0008021;GO:0015093;GO:0015093;GO:0016020;GO:0016021;GO:0016021;GO:0016323;GO:0016323;GO:0016323;GO:0017046;GO:0017046;GO:0017046;GO:0034395;GO:…	K14685	solute carrier family 40 (iron-regulatedtransporter), member 1 [Source:MGISymbol;Acc:MGI:1315204]
MGP_C57BL6NJ_G0036554	9.43618	18.8724	0	0	-Inf	0.0173311	0.382491	X	134946628	134990839	-	3608	Sytl4	GO:0005509;GO:0005515;GO:0005543;GO:0005543;GO:0005543;GO:0005544;GO:0005654;GO:0005768;GO:0005815;GO:0005829;GO:0005886;GO:0006886;GO:0006887;GO:0006887;GO:0006887;GO:0006906;GO:0008270;GO:0016020;GO:0016324;GO:0017137;GO:0017158;GO:0019898;GO:0019898;GO:0019905;GO:0030141;GO:0030141;GO:0030276;GO:0030658;GO:0030667;GO:0031410;GO:0042043;GO:0042043;GO:0045202;GO:0045921;GO:0046676;GO:0046676;GO:…	K17598	synaptotagmin-like 4 [Source:MGISymbol;Acc:MGI:1351606]
MGP_C57BL6NJ_G0035414	195.218	367.433	23.0039	0.062607	-3.99753	0.0173419	0.382491	9	63938755	64061300	+	5129	Itga11	GO:0007155;GO:0007155;GO:0007229;GO:0008305;GO:0016020;GO:0016021;	K06587	integrin alpha 11 [Source:MGISymbol;Acc:MGI:2442114]
MGP_C57BL6NJ_G0032940	39.9314	67.3791	12.4837	0.185275	-2.43226	0.0173445	0.382491	7	90100029	90127447	-	2103	Fah	GO:0003824;GO:0004334;GO:0004334;GO:0004334;GO:0004334;GO:0004334;GO:0005829;GO:0006527;GO:0006527;GO:0006559;GO:0006559;GO:0006572;GO:0006572;GO:0008152;GO:0009072;GO:0016787;GO:0046872;GO:0070062;GO:1902000;	K01555	fumarylacetoacetate hydrolase [Source:MGISymbol;Acc:MGI:95482]
MGP_C57BL6NJ_G0034819	108.048	44.515	171.581	3.85446	1.94653	0.0174254	0.383714	9	4606410	4617508	+	1673	Mmp27	GO:0003674;GO:0004222;GO:0006508;GO:0006508;GO:0008150;GO:0008233;GO:0008237;GO:0008237;GO:0008270;GO:0016787;GO:0031012;GO:0042406;GO:0046872;	K08005	matrix metallopeptidase 27 [Source:MGISymbol;Acc:MGI:3039232]
MGP_C57BL6NJ_G0036003	30.5081	55.3757	5.64044	0.101858	-3.29537	0.0176418	0.387914	X	1081613	1329194	+	8880	Shroom4	GO:0001725;GO:0001725;GO:0003779;GO:0005737;GO:0005737;GO:0005737;GO:0005856;GO:0005912;GO:0007015;GO:0007015;GO:0007015;GO:0007275;GO:0007420;GO:0009898;GO:0009898;GO:0009925;GO:0009925;GO:0015629;GO:0015629;GO:0016324;GO:0016324;GO:0016324;GO:0016460;GO:0016460;GO:0030036;GO:0030864;GO:0030864;GO:0030864;GO:0031941;GO:0043296;GO:0045159;GO:0045159;GO:0050890;GO:0051015;GO:0051015;GO:0051015;GO:…	K18625	shroom family member 4 [Source:MGISymbol;Acc:MGI:2685570]
MGP_C57BL6NJ_G0031749	540.647	258.077	823.216	3.1898	1.67347	0.0178085	0.38914	6	134384315	134435620	+	6850	Parp11	GO:0003950;GO:0003950;GO:0003950;GO:0005634;GO:0005635;GO:0005643;GO:0005643;GO:0006810;GO:0006998;GO:0007283;GO:0015031;GO:0016740;GO:0016757;GO:0030154;GO:0051028;GO:0006998;	-	poly (ADP-ribose) polymerase family, member 11[Source:MGI Symbol;Acc:MGI:2141505]
MGP_C57BL6NJ_G0030780	9.46903	18.5118	0.426248	0.0230257	-5.44061	0.0178389	0.38914	5	155069625	155170549	-	3366	Baiap2l1	GO:0003779;GO:0005654;GO:0005654;GO:0005737;GO:0005829;GO:0005829;GO:0005829;GO:0005856;GO:0005886;GO:0005913;GO:0007009;GO:0008286;GO:0009617;GO:0009617;GO:0015629;GO:0015629;GO:0015629;GO:0030833;GO:0030838;GO:0030838;GO:0030838;GO:0046626;GO:0051017;GO:0051764;GO:0070062;GO:0070064;GO:0070064;GO:0098609;GO:0098641;GO:2000251;GO:2000251;GO:2000251;	K20127	BAI1-associated protein 2-like 1 [Source:MGISymbol;Acc:MGI:1914148]
MGP_C57BL6NJ_G0024414	134.342	59.7405	208.943	3.49751	1.80633	0.0178512	0.38914	17	76647869	76685732	-	2201	Ndc80	GO:0000070;GO:0000132;GO:0000775;GO:0000775;GO:0000776;GO:0000776;GO:0000777;GO:0000777;GO:0000778;GO:0000942;GO:0005200;GO:0005515;GO:0005634;GO:0005634;GO:0005654;GO:0005694;GO:0005813;GO:0007049;GO:0007052;GO:0007052;GO:0007059;GO:0007059;GO:0008608;GO:0016020;GO:0031262;GO:0031262;GO:0031262;GO:0042802;GO:0051301;GO:0051310;GO:0051310;GO:0051315;GO:0051315;GO:0051315;GO:0051383;GO:0090267;GO:…	K11547	NDC80 kinetochore complex component [Source:MGISymbol;Acc:MGI:1914302]
MGP_C57BL6NJ_G0036553	166.132	307.243	25.0213	0.0814383	-3.61815	0.0178529	0.38914	X	134917176	134941172	+	2922	Srpx2	GO:0001525;GO:0005102;GO:0005102;GO:0005201;GO:0005576;GO:0005615;GO:0005615;GO:0005615;GO:0005737;GO:0005737;GO:0007155;GO:0009986;GO:0009986;GO:0015630;GO:0030054;GO:0036458;GO:0036458;GO:0042325;GO:0042325;GO:0042802;GO:0042802;GO:0045202;GO:0048870;GO:0048870;GO:0051965;GO:0051965;GO:0060076;GO:0060076;GO:0062023;GO:0071625;GO:0090050;GO:0097060;GO:0097060;GO:0098609;GO:0098609;GO:0005102;GO:…	K19408	sushi-repeat-containing protein, X-linked 2[Source:MGI Symbol;Acc:MGI:1916042]
MGP_C57BL6NJ_G0022123	41.8582	14.2817	69.4347	4.86181	2.28149	0.0179251	0.38914	15	6914195	7112074	-	7105	-	-	-	-
MGP_C57BL6NJ_G0018113	47.8153	89.1642	6.46644	0.0725228	-3.78542	0.0179451	0.38914	10	115855926	116714296	-	13806	Nav3	GO:0005524;GO:0022008;	-	neuron navigator 3 [Source:MGISymbol;Acc:MGI:2183703]
MGP_C57BL6NJ_G0032937	455.927	846.672	65.1824	0.0769866	-3.69925	0.017962	0.38914	7	89426685	89595178	-	12069	Cemip	GO:0004415;GO:0004415;GO:0004415;GO:0005540;GO:0005540;GO:0005540;GO:0005576;GO:0005634;GO:0005737;GO:0005737;GO:0005737;GO:0005783;GO:0005783;GO:0005886;GO:0005886;GO:0005905;GO:0007605;GO:0008152;GO:0010800;GO:0010800;GO:0016020;GO:0016787;GO:0016798;GO:0030214;GO:0030214;GO:0030214;GO:0030335;GO:0030335;GO:0030665;GO:0030665;GO:0032050;GO:0032050;GO:0045334;GO:0045334;GO:0046923;GO:0046923;GO:…	K19031	cell migration inducing protein, hyaluronan binding[Source:MGI Symbol;Acc:MGI:2443629]
MGP_C57BL6NJ_G0034337	136.214	219.317	53.1114	0.242167	-2.04593	0.0179647	0.38914	8	87984415	88033639	+	8089	Adgrl1	GO:0004871;GO:0004888;GO:0004930;GO:0004930;GO:0004930;GO:0004930;GO:0005622;GO:0005886;GO:0005886;GO:0005887;GO:0007157;GO:0007157;GO:0007157;GO:0007165;GO:0007166;GO:0007186;GO:0007186;GO:0007189;GO:0014069;GO:0014069;GO:0015643;GO:0016020;GO:0016020;GO:0016021;GO:0016021;GO:0016524;GO:0016524;GO:0016524;GO:0030054;GO:0030246;GO:0030246;GO:0030424;GO:0030424;GO:0030424;GO:0030426;GO:0030426;GO:…	-	adhesion G protein-coupled receptor L1 [Source:MGISymbol;Acc:MGI:1929461]
MGP_C57BL6NJ_G0024031	110.25	45.9236	174.576	3.80144	1.92655	0.0179655	0.38914	17	36677690	36681601	-	395	Lst1	GO:0000902;GO:0006955;GO:0016020;GO:0016020;GO:0016021;	-	leukocyte specific transcript 1 [Source:MGISymbol;Acc:MGI:1096324]
MGP_C57BL6NJ_G0033195	17.174	3.27523	31.0728	9.48721	3.24598	0.0179884	0.38914	7	111691213	111711327	-	5924	-	-	-	-
MGP_C57BL6NJ_G0019124	88.0766	141.589	34.5639	0.244114	-2.03437	0.0179899	0.38914	11	79486655	79656539	-	3281	Nxn	GO:0004791;GO:0004791;GO:0005515;GO:0005515;GO:0005515;GO:0005634;GO:0005634;GO:0005634;GO:0005737;GO:0005737;GO:0005829;GO:0007275;GO:0016055;GO:0016491;GO:0030154;GO:0030178;GO:0030178;GO:0031397;GO:0031397;GO:0045454;GO:0047134;GO:0055114;GO:0072358;GO:0072358;GO:0098869;	K17609	nucleoredoxin [Source:MGI Symbol;Acc:MGI:109331]"
MGP_C57BL6NJ_G0019228	4328.98	2067.26	6590.7	3.18814	1.67271	0.0180067	0.38914	11	86762136	86775241	+	4427	Slfn5	GO:0005634;	-	schlafen 5 [Source:MGI Symbol;Acc:MGI:1329004]"
MGP_C57BL6NJ_G0029041	173.587	75.8612	271.314	3.57645	1.83853	0.0180635	0.389811	4	121493633	121525221	-	7704	Rad54l	GO:0000724;GO:0006302;GO:0006974;GO:0008340;GO:0010212;GO:0042493;GO:0051276;	K10875	RAD54 like (S. cerevisiae) [Source:MGISymbol;Acc:MGI:894697]
MGP_C57BL6NJ_G0028628	1135.07	2128.33	141.818	0.0666335	-3.90761	0.01813	0.390687	4	43197314	43206319	-	2861	Tpm2	-	K10374	tropomyosin 2, beta [Source:MGISymbol;Acc:MGI:98810]
MGP_C57BL6NJ_G0034464	46.7579	86.1888	7.32701	0.0850112	-3.5562	0.0181645	0.390873	8	99711181	99723243	+	5356	Cx3cl1	GO:0008009;GO:0009986;GO:0019221;GO:0030593;GO:0032914;GO:0042060;GO:0043005;GO:0043025;GO:0044297;GO:0045766;GO:0048246;GO:0048247;GO:0060055;GO:2001240;	K05508	chemokine (C-X3-C motif) ligand 1 [Source:MGISymbol;Acc:MGI:1097153]
MGP_C57BL6NJ_G0030143	1299.87	626.769	1972.98	3.14785	1.65437	0.0182613	0.391909	5	93421898	93443878	+	3781	Dck	GO:0000166;GO:0000287;GO:0004137;GO:0004137;GO:0004137;GO:0005524;GO:0005524;GO:0005524;GO:0005634;GO:0005634;GO:0005737;GO:0005829;GO:0006139;GO:0006220;GO:0006220;GO:0008144;GO:0009157;GO:0009165;GO:0016301;GO:0016310;GO:0016740;GO:0017144;GO:0019136;GO:0019206;GO:0019206;GO:0032548;GO:0042803;GO:0046092;	K00893	deoxycytidine kinase [Source:MGISymbol;Acc:MGI:102726]
MGP_C57BL6NJ_G0029837	258.694	398.561	118.826	0.298137	-1.74595	0.0182739	0.391909	5	30817218	30841818	+	8183	Cad	GO:0000050;GO:0000166;GO:0002134;GO:0003824;GO:0003824;GO:0004070;GO:0004070;GO:0004070;GO:0004070;GO:0004087;GO:0004088;GO:0004088;GO:0004088;GO:0004088;GO:0004151;GO:0004151;GO:0004151;GO:0004672;GO:0005524;GO:0005524;GO:0005524;GO:0005634;GO:0005634;GO:0005654;GO:0005737;GO:0005737;GO:0005737;GO:0005829;GO:0006207;GO:0006207;GO:0006207;GO:0006207;GO:0006221;GO:0006228;GO:0006228;GO:0006520;GO:…	K11540	carbamoyl-phosphate synthetase 2, aspartatetranscarbamylase, and dihydroorotase [Source:MGISymbol;Acc:MGI:1916969]
MGP_C57BL6NJ_G0021571	8.98319	17.9664	0	0	-Inf	0.0182905	0.391909	14	31675294	31695765	-	4303	Cdhr1	GO:0005509;GO:0005515;GO:0005515;GO:0005886;GO:0005886;GO:0005887;GO:0005887;GO:0005887;GO:0007155;GO:0007155;GO:0007155;GO:0007156;GO:0008594;GO:0009987;GO:0009987;GO:0016020;GO:0016020;GO:0016021;GO:0035845;GO:0042622;GO:0042622;GO:0045494;GO:0045494;	K16501	cadherin-related family member 1 [Source:MGISymbol;Acc:MGI:2157782]
MGP_C57BL6NJ_G0031191	1753.58	869.268	2637.89	3.03461	1.60151	0.0183524	0.392679	6	53760564	54203692	+	24125	9430076C15Rik	-	K09047	cAMP responsive element binding protein 5[Source:MGI Symbol;Acc:MGI:2443973]
MGP_C57BL6NJ_G0021446	471.183	876.501	65.8643	0.0751445	-3.73419	0.0184172	0.393286	14	17599772	17724568	-	8491	Dlg5	GO:0001837;GO:0001837;GO:0005515;GO:0005515;GO:0005737;GO:0005856;GO:0005886;GO:0005913;GO:0006461;GO:0008013;GO:0008092;GO:0014069;GO:0016020;GO:0030011;GO:0030011;GO:0030054;GO:0030054;GO:0030336;GO:0030336;GO:0030859;GO:0030901;GO:0035331;GO:0035331;GO:0035332;GO:0035332;GO:0036064;GO:0042130;GO:0042130;GO:0042981;GO:0042995;GO:0045176;GO:0045186;GO:0045197;GO:0045202;GO:0045211;GO:0045880;GO:…	-	discs, large homolog 5 (Drosophila) [Source:MGISymbol;Acc:MGI:1918478]
MGP_C57BL6NJ_G0029351	759.245	378.35	1140.14	3.01346	1.59142	0.0184572	0.393286	4	141761693	141767219	+	1925	Stmn1	GO:0000281;GO:0000281;GO:0005515;GO:0005515;GO:0005622;GO:0005737;GO:0005737;GO:0005737;GO:0005737;GO:0005829;GO:0005829;GO:0005856;GO:0005874;GO:0007019;GO:0007019;GO:0007052;GO:0007275;GO:0007399;GO:0007409;GO:0007409;GO:0015631;GO:0015631;GO:0016020;GO:0016020;GO:0030154;GO:0031110;GO:0031110;GO:0031110;GO:0031115;GO:0031115;GO:0031175;GO:0035024;GO:0043005;GO:0048012;GO:0051272;GO:0051272;GO:…	K04381	stathmin 1 [Source:MGI Symbol;Acc:MGI:96739]"
MGP_C57BL6NJ_G0024995	49.3355	98.6709	0	0	-Inf	0.0185461	0.393286	18	80894089	80907842	-	1156	Siglec15	GO:0005515;GO:0005886;GO:0005886;GO:0016020;GO:0016021;GO:0032956;GO:0032956;GO:0032991;GO:0032991;GO:0043234;GO:0043234;GO:0045124;GO:0045124;GO:2001204;GO:2001204;	K16352	sialic acid binding Ig-like lectin 15 [Source:MGISymbol;Acc:MGI:3646642]
MGP_C57BL6NJ_G0022943	74.1915	28.3372	120.046	4.23633	2.08282	0.0185506	0.393286	16	9036749	9365380	+	5099	Shisa9	GO:0008328;GO:0014069;GO:0030165;GO:0032281;GO:0032591;GO:0045202;GO:0045211;GO:0048172;GO:2000311;	-	shisa family member 9 [Source:MGISymbol;Acc:MGI:1919805]
MGP_C57BL6NJ_G0034156	48.1771	91.5883	4.76596	0.0520368	-4.26432	0.0185845	0.393286	8	71052553	71462215	-	4774	Csgalnact1	GO:0001958;GO:0001958;GO:0005794;GO:0008376;GO:0008376;GO:0008376;GO:0008955;GO:0008955;GO:0015020;GO:0015020;GO:0016020;GO:0016021;GO:0016740;GO:0019276;GO:0019276;GO:0030198;GO:0030198;GO:0030204;GO:0030204;GO:0030206;GO:0030206;GO:0032580;GO:0032580;GO:0046398;GO:0046398;GO:0046872;GO:0047237;GO:0047237;GO:0047238;GO:0047238;GO:0050653;GO:0050653;GO:0051216;GO:0051216;	K00746	chondroitin sulfate N-acetylgalactosaminyltransferase 1 [Source:MGISymbol;Acc:MGI:2442354]
MGP_C57BL6NJ_G0026644	46.1786	78.1252	14.232	0.182169	-2.45665	0.0186242	0.393286	2	110480501	110499291	-	3165	Prrg4	GO:0003674;GO:0005509;GO:0005576;GO:0008150;GO:0016020;GO:0016021;	-	proline rich Gla (G-carboxyglutamic acid) 4(transmembrane) [Source:MGI Symbol;Acc:MGI:2442211]
MGP_C57BL6NJ_G0032013	126.766	201.332	52.1991	0.259268	-1.94748	0.0186654	0.393286	7	1943384	1963621	+	4284	Ssc5d	GO:0001968;GO:0001968;GO:0002376;GO:0005044;GO:0005044;GO:0005044;GO:0005515;GO:0005576;GO:0005576;GO:0005615;GO:0005615;GO:0005615;GO:0005622;GO:0005622;GO:0005737;GO:0006898;GO:0006952;GO:0006952;GO:0007275;GO:0009897;GO:0016020;GO:0031012;GO:0031012;GO:0042494;GO:0042494;GO:0043236;GO:0043236;GO:0045087;GO:0050829;GO:0050829;GO:0050830;GO:0050830;GO:0050840;GO:0050840;GO:2000482;GO:2000482;GO:…	-	scavenger receptor cysteine rich family, 5 domains[Source:MGI Symbol;Acc:MGI:3606211]
MGP_C57BL6NJ_G0023665	18.3212	33.2102	3.43228	0.10335	-3.27439	0.0186718	0.393286	17	23457361	23484667	-	2439	Zfp13	GO:0000122;GO:0000122;GO:0000122;GO:0000122;GO:0000977;GO:0000977;GO:0000981;GO:0001227;GO:0001227;GO:0003676;GO:0003677;GO:0005622;GO:0005634;GO:0005634;GO:0005739;GO:0006355;GO:0006357;GO:0010729;GO:0046872;GO:1901030;	K09228	zinc finger protein 13 [Source:MGISymbol;Acc:MGI:99159]
MGP_C57BL6NJ_G0026727	94.4981	178.161	10.8349	0.0608151	-4.03943	0.018695	0.393286	2	122334228	122542284	-	12017	Meis2	GO:0000978;GO:0001077;GO:0001654;GO:0003677;GO:0003677;GO:0003677;GO:0003712;GO:0005634;GO:0005634;GO:0005737;GO:0006351;GO:0006355;GO:0006355;GO:0006366;GO:0007275;GO:0008134;GO:0008542;GO:0043565;GO:0045638;GO:0045931;GO:0045944;GO:0048471;GO:0110024;GO:0001654;GO:0003677;GO:0003712;GO:0005634;GO:0008134;GO:0008542;GO:0043565;GO:0045638;	-	Meis homeobox 2 [Source:MGI Symbol;Acc:MGI:108564]"
MGP_C57BL6NJ_G0025511	997.901	507.788	1488.01	2.93038	1.55109	0.0186954	0.393286	19	39099538	39143816	+	7205	Hells	GO:0000166;GO:0000775;GO:0000775;GO:0001655;GO:0001655;GO:0003682;GO:0003682;GO:0004386;GO:0005515;GO:0005524;GO:0005524;GO:0005634;GO:0005634;GO:0005634;GO:0005721;GO:0005721;GO:0006306;GO:0006306;GO:0006342;GO:0006342;GO:0006346;GO:0006346;GO:0006351;GO:0006355;GO:0007049;GO:0007275;GO:0007275;GO:0010216;GO:0010216;GO:0016787;GO:0030098;GO:0031508;GO:0031508;GO:0043066;GO:0043066;GO:0046651;GO:…	K19001	helicase, lymphoid specific [Source:MGISymbol;Acc:MGI:106209]
MGP_C57BL6NJ_G0029601	114.698	205.806	23.5894	0.114619	-3.12508	0.0186983	0.393286	4	161781300	161809834	+	4686	Plekhg5	GO:0004871;GO:0005089;GO:0005089;GO:0005515;GO:0005737;GO:0005737;GO:0005886;GO:0005886;GO:0005911;GO:0007165;GO:0016020;GO:0030027;GO:0030054;GO:0030139;GO:0035023;GO:0035767;GO:0042995;GO:0043123;GO:0043542;GO:0048471;GO:0065009;GO:0005089;GO:0005737;GO:0005886;GO:0005911;GO:0030027;GO:0030139;GO:0035767;GO:0043542;	K19464	pleckstrin homology domain containing, family G(with RhoGef domain) member 5 [Source:MGISymbol;Acc:MGI:2652860]
MGP_C57BL6NJ_G0031709	446.432	209.485	683.379	3.26218	1.70584	0.018739	0.393286	6	131555640	131579161	-	4032	Cd4	GO:0001816;GO:0001816;GO:0001934;GO:0002250;GO:0002376;GO:0005515;GO:0005788;GO:0005788;GO:0005789;GO:0005789;GO:0005886;GO:0005886;GO:0005886;GO:0005887;GO:0006948;GO:0006955;GO:0007155;GO:0007166;GO:0007166;GO:0007166;GO:0008270;GO:0009897;GO:0009897;GO:0009897;GO:0009986;GO:0009986;GO:0010524;GO:0015026;GO:0016020;GO:0016020;GO:0016021;GO:0016021;GO:0019865;GO:0019899;GO:0019901;GO:0030217;GO:…	K06454	CD4 antigen [Source:MGI Symbol;Acc:MGI:88335]"
MGP_C57BL6NJ_G0017894	89.1022	147.187	31.0176	0.210736	-2.24649	0.0187528	0.393286	10	83786113	83793363	-	3222	Mex3d	GO:0003676;GO:0003723;	K15686	mex3 RNA binding family member D [Source:MGISymbol;Acc:MGI:2681847]
MGP_C57BL6NJ_G0020025	10.2825	20.565	0	0	-Inf	0.018764	0.393286	12	23230684	23367803	+	2802	Mboat2	GO:0003674;GO:0005575;GO:0005783;GO:0006629;GO:0006644;GO:0008150;GO:0008654;GO:0016020;GO:0016021;GO:0016740;GO:0016746;GO:0047184;	-	membrane bound O-acyltransferase domain containing2 [Source:MGI Symbol;Acc:MGI:1914466]
MGP_C57BL6NJ_G0016937	68.5756	111.221	25.9304	0.233144	-2.10071	0.0187713	0.393286	1	144830074	144859740	+	2726	Tmem9	GO:0003674;GO:0005764;GO:0005764;GO:0005765;GO:0005768;GO:0005770;GO:0005770;GO:0006810;GO:0008150;GO:0016020;GO:0016021;GO:0016021;GO:0031902;	-	transmembrane protein 9 [Source:MGISymbol;Acc:MGI:1913491]
MGP_C57BL6NJ_G0031627	75.1947	141.285	9.10473	0.0644424	-3.95585	0.0188003	0.393349	6	124468294	125101985	-	21171	Cacna1c	GO:0002095;GO:0002520;GO:0005216;GO:0005244;GO:0005245;GO:0005245;GO:0005245;GO:0005262;GO:0005515;GO:0005515;GO:0005515;GO:0005516;GO:0005516;GO:0005737;GO:0005886;GO:0005886;GO:0005886;GO:0005887;GO:0005891;GO:0005891;GO:0005891;GO:0006810;GO:0006811;GO:0006811;GO:0006816;GO:0006816;GO:0006816;GO:0006874;GO:0006939;GO:0007204;GO:0007268;GO:0007507;GO:0007628;GO:0008217;GO:0008331;GO:0008331;GO:…	K04850	calcium channel, voltage-dependent, L type, alpha1C subunit [Source:MGI Symbol;Acc:MGI:103013]
MGP_C57BL6NJ_G0030346	18.5687	33.6647	3.47268	0.103155	-3.27711	0.018883	0.394532	5	120398665	120471275	-	7466	Sgsm1	GO:0005096;GO:0005096;GO:0005096;GO:0005096;GO:0005515;GO:0005737;GO:0005794;GO:0005829;GO:0006886;GO:0012505;GO:0016020;GO:0017137;GO:0017137;GO:0017137;GO:0030659;GO:0030659;GO:0031338;GO:0031410;GO:0043547;GO:0045944;GO:0090630;	K21847	small G protein signaling modulator 1 [Source:MGISymbol;Acc:MGI:107320]
MGP_C57BL6NJ_G0022993	37.3099	65.5124	9.1073	0.139016	-2.84667	0.0189737	0.395832	16	14705170	14717372	+	2191	Serpind1	GO:0004867;GO:0004867;GO:0004867;GO:0005576;GO:0005615;GO:0005615;GO:0007596;GO:0007596;GO:0007599;GO:0008201;GO:0010466;GO:0010951;GO:0010951;GO:0030414;GO:0070062;	K03912	serine (or cysteine) peptidase inhibitor, clade D,member 1 [Source:MGI Symbol;Acc:MGI:96051]
MGP_C57BL6NJ_G0023184	57.8156	95.3611	20.2702	0.212563	-2.23404	0.0189976	0.395832	16	34435801	34532064	-	1808	Pdia5	GO:0003756;GO:0003756;GO:0005783;GO:0005783;GO:0005788;GO:0006457;GO:0015037;GO:0016853;GO:0034976;GO:0045454;GO:0055114;	K09583	protein disulfide isomerase associated 5[Source:MGI Symbol;Acc:MGI:1919849]
MGP_C57BL6NJ_G0016900	156.183	295.001	17.3654	0.0588655	-4.08643	0.0191341	0.398127	1	142699211	142715887	+	3306	Fmod	GO:0005576;GO:0005576;GO:0005578;GO:0005578;GO:0005578;GO:0005615;GO:0005615;GO:0005615;GO:0005622;GO:0030199;GO:0030199;GO:0031012;GO:0062023;GO:0062023;	K08121	fibromodulin [Source:MGI Symbol;Acc:MGI:1328364]"
MGP_C57BL6NJ_G0021348	945.2	453.711	1436.69	3.16653	1.6629	0.0192194	0.399352	13	123183337	123368582	-	3088	Parp8	GO:0003950;GO:0003950;GO:0016740;GO:0016757;	K15258	poly (ADP-ribose) polymerase family, member 8[Source:MGI Symbol;Acc:MGI:1098713]
MGP_C57BL6NJ_G0032979	163.603	306.127	21.0781	0.0688541	-3.86031	0.0193272	0.40104	7	95481024	95490823	-	3226	Prss23	GO:0004252;GO:0005576;GO:0005615;GO:0005615;GO:0005634;GO:0006508;GO:0006508;GO:0008233;GO:0008236;GO:0016787;GO:0070062;	K09627	protease, serine 23 [Source:MGISymbol;Acc:MGI:1923703]
MGP_C57BL6NJ_G0028351	65.7991	123.384	8.21409	0.0665733	-3.90891	0.0193733	0.401366	3	149676259	150054134	+	19133	Unc5c	GO:0005042;GO:0005042;GO:0005886;GO:0005886;GO:0005886;GO:0006915;GO:0007165;GO:0007275;GO:0007411;GO:0007420;GO:0016020;GO:0016021;GO:0016021;GO:0030054;GO:0030334;GO:0033564;GO:0038007;GO:0038007;GO:0043005;GO:0043065;GO:0045202;GO:0005042;GO:0005886;GO:0007411;GO:0007420;GO:0030334;GO:0033564;GO:0043065;	K07521	unc-5 netrin receptor C [Source:MGISymbol;Acc:MGI:1095412]
MGP_C57BL6NJ_G0028719	13186.9	6341.97	20031.8	3.15861	1.65929	0.0193961	0.401366	4	53561151	53692448	-	10363	Abca1	GO:0000166;GO:0002790;GO:0002790;GO:0005102;GO:0005515;GO:0005524;GO:0005524;GO:0005524;GO:0005548;GO:0005548;GO:0005794;GO:0005794;GO:0005886;GO:0005886;GO:0005887;GO:0005887;GO:0006497;GO:0006497;GO:0006810;GO:0006869;GO:0006911;GO:0006911;GO:0007040;GO:0007186;GO:0007189;GO:0008035;GO:0008203;GO:0008203;GO:0008509;GO:0008509;GO:0009897;GO:0009897;GO:0009986;GO:0010875;GO:0010875;GO:0010875;GO:…	K05641	ATP-binding cassette, sub-family A (ABC1), member 1[Source:MGI Symbol;Acc:MGI:99607]
MGP_C57BL6NJ_G0016949	16152.2	8026.83	24277.6	3.02456	1.59673	0.0194356	0.401635	1	147068621	147200591	-	18294	Ptprc	-	-	protein tyrosine phosphatase, receptor type, C[Source:MGI Symbol;Acc:MGI:97810]
MGP_C57BL6NJ_G0021180	1500.91	769.297	2232.53	2.90204	1.53707	0.0194844	0.402092	13	87053639	87223521	+	15453	Mef2c	GO:0000122;GO:0000122;GO:0000165;GO:0000165;GO:0000790;GO:0000977;GO:0000977;GO:0000977;GO:0000978;GO:0000978;GO:0000978;GO:0000980;GO:0000981;GO:0000981;GO:0000983;GO:0000983;GO:0000987;GO:0001046;GO:0001077;GO:0001077;GO:0001077;GO:0001077;GO:0001205;GO:0001205;GO:0001568;GO:0001649;GO:0001649;GO:0001764;GO:0001782;GO:0001947;GO:0001958;GO:0001974;GO:0002062;GO:0002467;GO:0002634;GO:0002931;GO:…	-	myocyte enhancer factor 2C [Source:MGISymbol;Acc:MGI:99458]
MGP_C57BL6NJ_G0023203	130.913	56.781	205.046	3.61117	1.85247	0.0196025	0.403722	16	35835257	35899839	-	3661	Cd86	GO:0002224;GO:0002224;GO:0002250;GO:0002376;GO:0002668;GO:0005102;GO:0005886;GO:0006955;GO:0007165;GO:0007166;GO:0009897;GO:0009897;GO:0009897;GO:0009986;GO:0009986;GO:0016020;GO:0016021;GO:0031295;GO:0034138;GO:0034138;GO:0042102;GO:0042102;GO:0042102;GO:0042104;GO:0042113;GO:0042113;GO:0042130;GO:0043231;GO:0043231;GO:0051607;GO:0051607;GO:0070062;GO:0071222;GO:0071222;GO:0071222;	K05413	CD86 antigen [Source:MGI Symbol;Acc:MGI:101773]"
MGP_C57BL6NJ_G0027504	7.15997	14.3199	0	0	-Inf	0.0196168	0.403722	3	16239160	16242503	+	3344	Bhlhe22	GO:0000981;GO:0006355;GO:0006357;GO:0022008;GO:0046983;	K09086	basic helix-loop-helix family, member e22[Source:MGI Symbol;Acc:MGI:1930001]
MGP_C57BL6NJ_G0016572	93.7849	148.819	38.7511	0.260391	-1.94125	0.0197345	0.40559	1	78749584	78758891	+	4283	Dnajb2	GO:0000502;GO:0001671;GO:0001671;GO:0001671;GO:0005634;GO:0005634;GO:0005737;GO:0005737;GO:0005783;GO:0005789;GO:0005829;GO:0005829;GO:0008285;GO:0008285;GO:0016020;GO:0016234;GO:0030308;GO:0030308;GO:0030433;GO:0030433;GO:0030544;GO:0030544;GO:0030544;GO:0031227;GO:0031227;GO:0031227;GO:0031396;GO:0031396;GO:0031398;GO:0031593;GO:0031593;GO:0031625;GO:0031965;GO:0032091;GO:0032436;GO:0032436;GO:…	K09508	DnaJ heat shock protein family (Hsp40) member B2[Source:MGI Symbol;Acc:MGI:1928739]
MGP_C57BL6NJ_G0022884	175.376	325.759	24.9935	0.076724	-3.70418	0.0197675	0.405717	16	1221709	1232583	+	3007	Vasn	GO:0005515;GO:0005615;GO:0005615;GO:0005739;GO:0005739;GO:0005765;GO:0005886;GO:0005886;GO:0005886;GO:0007166;GO:0009986;GO:0010719;GO:0016020;GO:0016021;GO:0030512;GO:0030512;GO:0031012;GO:0045296;GO:0050431;GO:0050431;GO:0070062;GO:0071456;GO:0071456;GO:0071461;GO:0071461;	-	vasorin [Source:MGI Symbol;Acc:MGI:2177651]"
MGP_C57BL6NJ_G0032138	170.096	263.475	76.7166	0.291172	-1.78005	0.0200073	0.409615	7	14301903	14306938	-	736	-	-	-	-
MGP_C57BL6NJ_G0029588	137.671	216.161	59.1803	0.273779	-1.86892	0.0200117	0.409615	4	160503569	160539038	+	2722	Tnfrsf9	GO:0004872;GO:0004872;GO:0005031;GO:0005615;GO:0005887;GO:0006915;GO:0006954;GO:0006955;GO:0007165;GO:0007275;GO:0008285;GO:0009897;GO:0009897;GO:0016020;GO:0016021;GO:0019955;GO:0032496;GO:0033209;GO:0038023;GO:0038023;GO:0042127;GO:0042981;GO:0070207;GO:0097190;GO:2001180;GO:2001183;GO:0004872;GO:0005615;GO:0009897;GO:0019955;GO:0038023;GO:0042127;GO:0070207;GO:2001180;GO:2001183;	-	tumor necrosis factor receptor superfamily, member9 [Source:MGI Symbol;Acc:MGI:1101059]
MGP_C57BL6NJ_G0017375	978.333	1827.24	129.422	0.0708293	-3.81951	0.0200965	0.410343	10	1253807	1367214	+	6244	Akap12	GO:0005737;GO:0005829;GO:0005856;GO:0005886;GO:0005925;GO:0006605;GO:0007165;GO:0007165;GO:0007193;GO:0008179;GO:0010738;GO:0010739;GO:0010739;GO:0016020;GO:0016301;GO:0016310;GO:0030159;GO:0030819;GO:0051018;GO:0090036;	K16528	A kinase (PRKA) anchor protein (gravin) 12[Source:MGI Symbol;Acc:MGI:1932576]
MGP_C57BL6NJ_G0018550	101.77	192.258	11.2809	0.0586756	-4.09109	0.0201175	0.410343	11	34513587	35150748	+	7677	Slit3	GO:0003180;GO:0003180;GO:0003181;GO:0003181;GO:0005102;GO:0005509;GO:0005576;GO:0005615;GO:0005615;GO:0005615;GO:0005739;GO:0005886;GO:0007275;GO:0007399;GO:0007411;GO:0007411;GO:0008285;GO:0008285;GO:0009887;GO:0009887;GO:0010629;GO:0010629;GO:0016020;GO:0030154;GO:0030308;GO:0035385;GO:0048495;GO:0048846;GO:0050919;GO:0060412;GO:0060412;GO:0070100;	K06850	slit homolog 3 (Drosophila) [Source:MGISymbol;Acc:MGI:1315202]
MGP_C57BL6NJ_G0033571	59.5738	111.85	7.29727	0.0652413	-3.93807	0.0201533	0.410343	7	137830817	137843494	+	4453	Tgfb1i1	GO:0003713;GO:0003713;GO:0005515;GO:0005622;GO:0005634;GO:0005737;GO:0005856;GO:0005925;GO:0005925;GO:0009408;GO:0010718;GO:0016055;GO:0016331;GO:0016363;GO:0030054;GO:0030154;GO:0030511;GO:0030512;GO:0030579;GO:0030855;GO:0031012;GO:0045165;GO:0045599;GO:0045893;GO:0046872;GO:0048495;GO:0050681;GO:0070411;GO:0005925;GO:0016331;GO:0030855;GO:0045165;GO:0045599;	-	transforming growth factor beta 1 inducedtranscript 1 [Source:MGI Symbol;Acc:MGI:102784]
MGP_C57BL6NJ_G0035615	19.4655	35.0947	3.83623	0.109311	-3.19349	0.0201758	0.410343	9	93651139	93706081	+	6282	Adamts7	GO:0004222;GO:0004222;GO:0005576;GO:0005578;GO:0005615;GO:0005615;GO:0006508;GO:0006508;GO:0006508;GO:0006508;GO:0008233;GO:0008233;GO:0008237;GO:0008237;GO:0008237;GO:0008237;GO:0008270;GO:0009986;GO:0009986;GO:0016787;GO:0032331;GO:0046872;GO:0051603;GO:0071347;GO:0071356;GO:0071773;	K08622	a disintegrin-like and metallopeptidase (reprolysintype) with thrombospondin type 1 motif, 7 [Source:MGISymbol;Acc:MGI:1347346]
MGP_C57BL6NJ_G0024599	13.5977	25.46	1.73537	0.0681608	-3.87491	0.020183	0.410343	18	22050554	22301941	+	9146	Dtna	GO:0005515;GO:0005515;GO:0005737;GO:0005737;GO:0005886;GO:0008270;GO:0016014;GO:0016020;GO:0030054;GO:0030165;GO:0030424;GO:0031234;GO:0032991;GO:0042383;GO:0042995;GO:0043234;GO:0045202;GO:0045202;GO:0046872;	-	dystrobrevin alpha [Source:MGISymbol;Acc:MGI:106039]
MGP_C57BL6NJ_G0025197	7.07482	14.1496	0	0	-Inf	0.0203469	0.412758	19	4293382	4307078	-	5859	Flrt1	GO:0004860;GO:0005104;GO:0005104;GO:0005576;GO:0005615;GO:0005615;GO:0005737;GO:0005783;GO:0005789;GO:0005886;GO:0005887;GO:0005887;GO:0005911;GO:0005911;GO:0005925;GO:0005925;GO:0006469;GO:0007155;GO:0007275;GO:0008543;GO:0008543;GO:0016020;GO:0016021;GO:0016358;GO:0016358;GO:0019221;GO:0030054;GO:0030659;GO:0031410;GO:0031410;GO:0032809;GO:0032809;GO:0042995;GO:0044306;GO:0044306;GO:0046426;GO:…	K16362	fibronectin leucine rich transmembrane protein 1[Source:MGI Symbol;Acc:MGI:3026647]
MGP_C57BL6NJ_G0030623	7.06932	14.1386	0	0	-Inf	0.0203952	0.412758	5	145720353	145725123	+	1031	Hspb1	GO:0000502;GO:0000502;GO:0001932;GO:0003723;GO:0005080;GO:0005080;GO:0005615;GO:0005622;GO:0005622;GO:0005634;GO:0005634;GO:0005634;GO:0005737;GO:0005737;GO:0005737;GO:0005819;GO:0005856;GO:0005886;GO:0005886;GO:0005925;GO:0006469;GO:0006469;GO:0006986;GO:0008426;GO:0008426;GO:0009615;GO:0010976;GO:0019901;GO:0030018;GO:0030018;GO:0030424;GO:0030425;GO:0031012;GO:0031430;GO:0031674;GO:0032731;GO:…	K04455	heat shock protein 1 [Source:MGISymbol;Acc:MGI:96240]
MGP_C57BL6NJ_G0024374	24.7567	48.6609	0.852495	0.0175191	-5.83493	0.0204444	0.412758	17	67152540	67444181	-	4118	Efna5	GO:0005169;GO:0005169;GO:0005515;GO:0005515;GO:0005604;GO:0005604;GO:0005886;GO:0005886;GO:0005886;GO:0005901;GO:0005912;GO:0005912;GO:0007275;GO:0007399;GO:0007411;GO:0007411;GO:0007411;GO:0007420;GO:0016020;GO:0016020;GO:0022407;GO:0022407;GO:0022407;GO:0022407;GO:0022604;GO:0030154;GO:0031225;GO:0031290;GO:0031290;GO:0031362;GO:0031362;GO:0032956;GO:0032956;GO:0032956;GO:0032956;GO:0043087;GO:…	K05462	ephrin A5 [Source:MGI Symbol;Acc:MGI:107444]"
MGP_C57BL6NJ_G0035237	974.09	1828	120.18	0.0657442	-3.92699	0.0204623	0.412758	9	45812374	45818808	-	1586	Tagln	GO:0005737;GO:0030855;GO:0051015;	K20526	transgelin [Source:MGI Symbol;Acc:MGI:106012]"
MGP_C57BL6NJ_G0016586	54.7491	89.6045	19.8937	0.222017	-2.17126	0.0204677	0.412758	1	81053366	81213081	-	8054	Epha4	GO:0000166;GO:0004672;GO:0004672;GO:0004672;GO:0004713;GO:0004713;GO:0004713;GO:0004714;GO:0004714;GO:0004888;GO:0005003;GO:0005004;GO:0005004;GO:0005005;GO:0005005;GO:0005005;GO:0005515;GO:0005515;GO:0005524;GO:0005524;GO:0005737;GO:0005737;GO:0005737;GO:0005741;GO:0005768;GO:0005769;GO:0005783;GO:0005794;GO:0005886;GO:0005886;GO:0005886;GO:0005887;GO:0005887;GO:0005887;GO:0005887;GO:0005887;GO:…	K05105	Eph receptor A4 [Source:MGI Symbol;Acc:MGI:98277]"
MGP_C57BL6NJ_G0022714	52.0616	92.1072	12.0161	0.130457	-2.93835	0.0205168	0.412758	15	104098192	104110638	+	3120	Cacnb3	GO:0005244;GO:0005245;GO:0005245;GO:0005246;GO:0005246;GO:0005262;GO:0005515;GO:0005737;GO:0005886;GO:0005891;GO:0005891;GO:0005891;GO:0006810;GO:0006811;GO:0006816;GO:0006816;GO:0007268;GO:0007528;GO:0008331;GO:0008331;GO:0008331;GO:0016020;GO:0016324;GO:0019901;GO:0034765;GO:0034765;GO:0050852;GO:0050966;GO:0060402;GO:0060402;GO:0061577;GO:0061577;GO:0070588;GO:0070588;GO:0070588;GO:0070588;GO:…	K04864	calcium channel, voltage-dependent, beta 3 subunit[Source:MGI Symbol;Acc:MGI:103307]
MGP_C57BL6NJ_G0022658	14.1311	28.2621	0	0	-Inf	0.020548	0.412758	15	95943024	96270221	-	8366	Slc2a13	GO:0005215;GO:0005351;GO:0005355;GO:0005887;GO:0006810;GO:0008645;GO:0015992;GO:0016020;GO:0016020;GO:0016021;GO:0016021;GO:0022857;GO:0035428;GO:0046323;GO:0055085;GO:1902600;GO:1904659;	K08150	solute carrier family 2 (facilitated glucosetransporter), member 13 [Source:MGISymbol;Acc:MGI:2146030]
MGP_C57BL6NJ_G0027726	22.8828	41.4627	4.30288	0.103777	-3.26844	0.0206225	0.412758	3	77992179	78087341	+	7290	Serpini1	GO:0004867;GO:0004867;GO:0004867;GO:0005576;GO:0005615;GO:0005615;GO:0005615;GO:0005615;GO:0005615;GO:0010466;GO:0010951;GO:0010951;GO:0010976;GO:0030155;GO:0030414;GO:0031410;GO:0034774;GO:0034774;GO:0043025;GO:0043025;GO:0043025;GO:0043204;GO:0060205;GO:0070062;	-	serine (or cysteine) peptidase inhibitor, clade I,member 1 [Source:MGI Symbol;Acc:MGI:1194506]
MGP_C57BL6NJ_G0027333	6.98265	13.9653	0	0	-Inf	0.0206436	0.412758	2	177933509	177994590	-	2567	Ptgis	GO:0001516;GO:0001516;GO:0001516;GO:0001516;GO:0001666;GO:0004497;GO:0005506;GO:0005615;GO:0005615;GO:0005634;GO:0005634;GO:0005634;GO:0005737;GO:0005737;GO:0005783;GO:0005783;GO:0005783;GO:0005789;GO:0005901;GO:0005901;GO:0006629;GO:0006631;GO:0006633;GO:0006693;GO:0007566;GO:0007566;GO:0008116;GO:0008116;GO:0008116;GO:0008116;GO:0016020;GO:0016021;GO:0016705;GO:0016853;GO:0020037;GO:0020037;GO:…	-	prostaglandin I2 (prostacyclin) synthase[Source:MGI Symbol;Acc:MGI:1097156]
MGP_C57BL6NJ_G0023136	364.263	719.077	9.44823	0.0131394	-6.24996	0.0206641	0.412758	16	30020219	30065485	+	3800	Bdh1	GO:0003824;GO:0003858;GO:0003858;GO:0005543;GO:0005654;GO:0005739;GO:0005739;GO:0005743;GO:0005743;GO:0005759;GO:0008152;GO:0016020;GO:0016491;GO:0016491;GO:0055114;GO:0055114;GO:0099617;GO:0005739;GO:0005743;	K00019	3-hydroxybutyrate dehydrogenase, type 1 [Source:MGISymbol;Acc:MGI:1919161]
MGP_C57BL6NJ_G0017734	7.10241	14.2048	0	0	-Inf	0.020673	0.412758	10	73045316	73148955	-	8547	Phyhipl	GO:0003674;GO:0005737;GO:0005739;GO:0005739;GO:0008150;	-	phytanoyl-CoA hydroxylase interacting protein-like[Source:MGI Symbol;Acc:MGI:1918161]
MGP_C57BL6NJ_G0031266	1797.87	908.789	2686.96	2.95664	1.56396	0.0206943	0.412758	6	66532342	66562917	-	6416	Hpgds	GO:0000287;GO:0000287;GO:0001516;GO:0004364;GO:0004364;GO:0004667;GO:0004667;GO:0004667;GO:0005509;GO:0005509;GO:0005737;GO:0006629;GO:0006631;GO:0006633;GO:0006693;GO:0006693;GO:0006693;GO:0016740;GO:0016853;GO:0042803;GO:2000255;GO:2000255;	K04097	hematopoietic prostaglandin D synthase [Source:MGISymbol;Acc:MGI:1859384]
MGP_C57BL6NJ_G0029705	11.4378	22.007	0.868656	0.0394719	-4.66303	0.0206947	0.412758	5	2874488	2957302	-	7905	Cfap69	GO:0003674;GO:0005575;GO:0005737;GO:0005737;GO:0008150;GO:0097225;GO:0097225;GO:1902093;GO:1902093;GO:1905516;GO:1905516;	-	cilia and flagella associated protein 69[Source:MGI Symbol;Acc:MGI:2443778]
MGP_C57BL6NJ_G0034806	599.605	290.324	908.887	3.13059	1.64644	0.0207208	0.412758	9	2216125	2249033	+	3710	Casp4	GO:0002376;GO:0004197;GO:0004197;GO:0004197;GO:0005576;GO:0005737;GO:0005737;GO:0005739;GO:0005739;GO:0005783;GO:0005783;GO:0005789;GO:0005829;GO:0005829;GO:0005886;GO:0006508;GO:0006508;GO:0006508;GO:0006915;GO:0006919;GO:0006954;GO:0007015;GO:0008233;GO:0008233;GO:0008234;GO:0008234;GO:0012501;GO:0016020;GO:0016787;GO:0032991;GO:0035234;GO:0042981;GO:0043005;GO:0043025;GO:0043234;GO:0045087;GO:…	-	caspase 4, apoptosis-related cysteine peptidase[Source:MGI Symbol;Acc:MGI:107700]
MGP_C57BL6NJ_G0026941	1124.07	532.867	1715.28	3.21897	1.6866	0.0207217	0.412758	2	138720653	138739142	-	7143	Siglec1	GO:0016020;GO:0016021;GO:0030246;	K06548	sialic acid binding Ig-like lectin 1, sialoadhesin[Source:MGI Symbol;Acc:MGI:99668]
MGP_C57BL6NJ_G0019871	108.231	210.44	6.02241	0.0286182	-5.12692	0.020739	0.412758	11	127459958	127500353	+	4605	Card14	GO:0001934;GO:0005737;GO:0005737;GO:0006915;GO:0033209;GO:0033209;GO:0042981;GO:0043066;GO:0043066;GO:0050700;GO:0051092;GO:0051092;	K20913	caspase recruitment domain family, member 14[Source:MGI Symbol;Acc:MGI:2386258]
MGP_C57BL6NJ_G0019730	66.0051	122.021	9.98954	0.0818676	-3.61056	0.0207917	0.413262	11	116672486	116726015	-	3071	Fam20a	GO:0001934;GO:0001934;GO:0001934;GO:0005576;GO:0005615;GO:0005615;GO:0005615;GO:0005623;GO:0005623;GO:0005783;GO:0005783;GO:0005794;GO:0005794;GO:0005794;GO:0006468;GO:0009617;GO:0009617;GO:0031214;GO:0031214;GO:0043539;GO:0043539;GO:0043539;GO:0044691;GO:0055074;GO:0070062;GO:0070166;GO:0070166;GO:0070166;GO:0071902;	K21957	family with sequence similarity 20, member A[Source:MGI Symbol;Acc:MGI:2388266]
MGP_C57BL6NJ_G0016860	5.85081	0	11.7016	Inf	Inf	0.0208338	0.413556	1	140099241	140135235	+	3170	Ctse	GO:0004190;GO:0004190;GO:0004190;GO:0004190;GO:0004190;GO:0005768;GO:0005768;GO:0005768;GO:0005768;GO:0006508;GO:0006508;GO:0006508;GO:0008233;GO:0016540;GO:0016540;GO:0016787;GO:0019886;GO:0019886;GO:0019886;GO:0030163;GO:0042803;GO:0042803;GO:0070062;	K01382	cathepsin E [Source:MGI Symbol;Acc:MGI:107361]"
MGP_C57BL6NJ_G0035205	287.828	442.18	133.477	0.301861	-1.72805	0.0209027	0.414378	9	44248644	44279419	+	6984	Bcl9l	GO:0003713;GO:0005515;GO:0005634;GO:0005634;GO:0005634;GO:0005654;GO:0005730;GO:0006351;GO:0006355;GO:0008013;GO:0008013;GO:0008013;GO:0010718;GO:0022604;GO:0030512;GO:0035019;GO:0035019;GO:0035914;GO:0035914;GO:0045944;GO:0045944;GO:0060070;GO:0060070;GO:0060070;GO:1990907;	K22649	B cell CLL/lymphoma 9-like [Source:MGISymbol;Acc:MGI:1933114]
MGP_C57BL6NJ_G0033246	137.74	273.748	1.73149	0.00632511	-7.30469	0.0209854	0.41502	7	113174420	113198219	-	4404	Apbb1	GO:0000122;GO:0001540;GO:0001540;GO:0001540;GO:0001540;GO:0001764;GO:0003682;GO:0005515;GO:0005515;GO:0005515;GO:0005634;GO:0005634;GO:0005634;GO:0005737;GO:0005737;GO:0005737;GO:0005886;GO:0005886;GO:0006302;GO:0006302;GO:0006325;GO:0006351;GO:0006355;GO:0006355;GO:0006915;GO:0006974;GO:0006974;GO:0007050;GO:0007411;GO:0008134;GO:0008134;GO:0008542;GO:0010976;GO:0016020;GO:0016569;GO:0016607;GO:…	K04529	amyloid beta (A4) precursor protein-binding, familyB, member 1 [Source:MGI Symbol;Acc:MGI:107765]
MGP_C57BL6NJ_G0028260	9.07349	17.7126	0.434328	0.0245208	-5.34985	0.02099	0.41502	3	129758083	129760040	+	1136	1810037I17Rik	GO:0003674;GO:0005575;GO:0008150;GO:0016020;GO:0016021;	-	RIKEN cDNA 1810037I17 gene [Source:MGISymbol;Acc:MGI:1914954]
MGP_C57BL6NJ_G0024102	5.82237	0	11.6447	Inf	Inf	0.0210242	0.415151	17	39185884	39188087	+	931	Ubd	GO:0001650;GO:0001650;GO:0005515;GO:0005515;GO:0005634;GO:0005634;GO:0005634;GO:0005634;GO:0005737;GO:0005737;GO:0005737;GO:0006511;GO:0006511;GO:0006511;GO:0006511;GO:0016235;GO:0016235;GO:0016567;GO:0016567;GO:0016567;GO:0016567;GO:0032446;GO:0034341;GO:0034341;GO:0034341;GO:0034612;GO:0034612;GO:0034612;GO:0043011;GO:0043011;GO:0043011;GO:0043065;GO:0043065;GO:0043065;GO:0043065;GO:0043123;GO:…	K12157	ubiquitin D [Source:MGI Symbol;Acc:MGI:1344410]"
MGP_C57BL6NJ_G0023573	54.4546	103.717	5.19253	0.0500646	-4.32007	0.0212049	0.418174	17	12670872	12801115	+	2832	Smoc2	GO:0005509;GO:0005509;GO:0005509;GO:0005539;GO:0005539;GO:0005576;GO:0005578;GO:0005578;GO:0005578;GO:0005578;GO:0005604;GO:0005604;GO:0005604;GO:0005614;GO:0005614;GO:0005615;GO:0007165;GO:0008201;GO:0008201;GO:0010595;GO:0010811;GO:0010811;GO:0030198;GO:0030198;GO:0031012;GO:0031012;GO:0035470;GO:0045766;GO:0045931;GO:0046872;GO:0062023;GO:0071944;GO:1900748;GO:2000573;GO:2001028;	-	SPARC related modular calcium binding 2 [Source:MGISymbol;Acc:MGI:1929881]
MGP_C57BL6NJ_G0017788	221.785	355.592	87.9783	0.247414	-2.015	0.021265	0.418812	10	80036238	80166191	-	7021	Col18a1	GO:0001525;GO:0001525;GO:0001886;GO:0001886;GO:0005198;GO:0005201;GO:0005576;GO:0005576;GO:0005578;GO:0005581;GO:0005604;GO:0005604;GO:0005604;GO:0005615;GO:0005615;GO:0005615;GO:0007155;GO:0007155;GO:0008284;GO:0030020;GO:0030198;GO:0030198;GO:0030335;GO:0031012;GO:0031012;GO:0031012;GO:0046872;GO:0062023;GO:0070062;GO:2000353;GO:0001525;GO:0001886;GO:0005604;GO:0005615;GO:0008284;GO:0030198;GO:…	K06823	collagen, type XVIII, alpha 1 [Source:MGISymbol;Acc:MGI:88451]
MGP_C57BL6NJ_G0028410	6.92192	0	13.8438	Inf	Inf	0.0214484	0.421395	3	162244940	162813924	-	8993	St6galnac3	GO:0000139;GO:0000139;GO:0001574;GO:0001665;GO:0005654;GO:0005794;GO:0006486;GO:0006486;GO:0006486;GO:0006677;GO:0006687;GO:0008373;GO:0008373;GO:0008373;GO:0009100;GO:0009311;GO:0016020;GO:0016021;GO:0016740;GO:0016757;GO:0018279;GO:0047290;GO:0097503;	K03373	ST6 (alpha-N-acetyl-neuraminyl-2,3-beta-galactosyl-1,3)-N-acetylgalactosaminide alpha-2,6-sialyltransferase 3[Source:MGI Symbol;Acc:MGI:1341828]
MGP_C57BL6NJ_G0024540	17.6887	33.6478	1.72955	0.0514015	-4.28205	0.0214519	0.421395	18	4051835	4154037	-	3919	Mkx	-	-	mohawk homeobox [Source:MGISymbol;Acc:MGI:2687286]
MGP_C57BL6NJ_G0021051	67.2302	27.5038	106.957	3.88879	1.95932	0.021534	0.422378	13	64735771	64779847	-	3195	Gm5141	GO:0000976;GO:0003676;GO:0003700;GO:0005575;GO:0005622;GO:0005634;GO:0006355;GO:0006355;GO:0046872;	K09228	predicted gene 5141 [Source:MGISymbol;Acc:MGI:3779466]
MGP_C57BL6NJ_G0022547	35.1525	11.16	59.1451	5.29975	2.40592	0.0215579	0.422378	15	85975210	85986327	-	1201	Cenpm	GO:0000775;GO:0000776;GO:0000777;GO:0003674;GO:0005634;GO:0005694;GO:0005737;GO:0005829;GO:0008150;	-	centromere protein M [Source:MGISymbol;Acc:MGI:1913820]
MGP_C57BL6NJ_G0024053	36.55	68.3223	4.77761	0.0699275	-3.838	0.0216216	0.422454	17	37335614	37359659	-	4684	Ddr1	GO:0000166;GO:0001558;GO:0001952;GO:0004672;GO:0004713;GO:0004713;GO:0004713;GO:0004714;GO:0004714;GO:0004714;GO:0004888;GO:0005518;GO:0005518;GO:0005518;GO:0005524;GO:0005524;GO:0005615;GO:0005737;GO:0005737;GO:0005886;GO:0005886;GO:0005887;GO:0005887;GO:0005903;GO:0006468;GO:0007169;GO:0007565;GO:0007566;GO:0007595;GO:0008285;GO:0009968;GO:0010715;GO:0010715;GO:0014909;GO:0014909;GO:0016020;GO:…	-	discoidin domain receptor family, member 1[Source:MGI Symbol;Acc:MGI:99216]
MGP_C57BL6NJ_G0031011	34.0327	65.8938	2.17164	0.0329567	-4.92329	0.0216225	0.422454	6	35768449	35869204	-	3433	Ptn	GO:0001503;GO:0001503;GO:0005539;GO:0005576;GO:0005576;GO:0005576;GO:0005578;GO:0005604;GO:0005615;GO:0005615;GO:0005737;GO:0005783;GO:0007612;GO:0007612;GO:0008083;GO:0008083;GO:0008083;GO:0008083;GO:0008201;GO:0008201;GO:0008284;GO:0008284;GO:0008360;GO:0009986;GO:0010469;GO:0010811;GO:0010976;GO:0016020;GO:0016525;GO:0019901;GO:0030282;GO:0030282;GO:0030336;GO:0031012;GO:0031594;GO:0032991;GO:…	K16642	pleiotrophin [Source:MGI Symbol;Acc:MGI:97804]"
MGP_C57BL6NJ_G0027588	210.258	394.941	25.5752	0.0647572	-3.94882	0.0216551	0.422454	3	36834723	36897288	+	6782	Fgf2	GO:0000186;GO:0001525;GO:0001525;GO:0001658;GO:0001658;GO:0001759;GO:0001934;GO:0001938;GO:0002042;GO:0005104;GO:0005104;GO:0005125;GO:0005178;GO:0005178;GO:0005515;GO:0005515;GO:0005576;GO:0005576;GO:0005615;GO:0005634;GO:0005634;GO:0005737;GO:0006661;GO:0007275;GO:0008083;GO:0008083;GO:0008083;GO:0008201;GO:0008284;GO:0008285;GO:0008543;GO:0008543;GO:0009792;GO:0010001;GO:0010469;GO:0010595;GO:…	K18497	fibroblast growth factor 2 [Source:MGISymbol;Acc:MGI:95516]
MGP_C57BL6NJ_G0035597	993.457	505.276	1481.64	2.93234	1.55205	0.0216749	0.422454	9	90418717	90496229	-	11594	Cep162	GO:0005515;GO:0005515;GO:0005634;GO:0005737;GO:0005813;GO:0005814;GO:0005814;GO:0005819;GO:0005856;GO:0005874;GO:0005879;GO:0005879;GO:0030030;GO:0060271;GO:0060271;	K16809	centrosomal protein 162 [Source:MGISymbol;Acc:MGI:1925343]
MGP_C57BL6NJ_G0020334	918.096	1711.02	125.174	0.0731573	-3.77285	0.0217179	0.422454	12	87988863	88085753	-	8184	Ltbp2	GO:0005509;	K08023	latent transforming growth factor beta bindingprotein 2 [Source:MGI Symbol;Acc:MGI:99502]
MGP_C57BL6NJ_G0019369	36.4627	68.6063	4.31904	0.0629539	-3.98956	0.0217556	0.422454	11	100292495	100324566	-	5710	Itga3	GO:0001764;GO:0001968;GO:0002020;GO:0005178;GO:0005515;GO:0005518;GO:0005886;GO:0005886;GO:0005925;GO:0007155;GO:0007155;GO:0007155;GO:0007229;GO:0007613;GO:0008305;GO:0009897;GO:0009986;GO:0010628;GO:0010634;GO:0010811;GO:0010976;GO:0016020;GO:0016021;GO:0016323;GO:0017015;GO:0019904;GO:0030054;GO:0030111;GO:0030324;GO:0030426;GO:0030510;GO:0031345;GO:0031527;GO:0031527;GO:0034667;GO:0035024;GO:…	K06482	integrin alpha 3 [Source:MGI Symbol;Acc:MGI:96602]"
MGP_C57BL6NJ_G0024572	73.6181	137.754	9.48249	0.0688366	-3.86068	0.021773	0.422454	18	11490638	11783121	-	6152	Zfp521	GO:0003676;GO:0003677;GO:0005634;GO:0005634;GO:0005654;GO:0006351;GO:0006355;GO:0007275;GO:0010468;GO:0019904;GO:0030154;GO:0046872;GO:0048663;GO:0048663;	-	zinc finger protein 521 [Source:MGISymbol;Acc:MGI:95459]
MGP_C57BL6NJ_G0030508	157.914	70.6592	245.169	3.46974	1.79483	0.0217855	0.422454	5	132451703	132524620	+	7983	Kntc1	-	K11577	kinetochore associated 1 [Source:MGISymbol;Acc:MGI:2673709]
MGP_C57BL6NJ_G0024685	242.978	423.512	62.444	0.147443	-2.76177	0.0219043	0.424187	18	36128736	36139608	-	2373	Hbegf	GO:0001525;GO:0001832;GO:0005154;GO:0005154;GO:0005154;GO:0005154;GO:0005576;GO:0005576;GO:0005615;GO:0005615;GO:0005615;GO:0005615;GO:0005615;GO:0005886;GO:0005887;GO:0005887;GO:0005887;GO:0007173;GO:0007173;GO:0007173;GO:0008016;GO:0008016;GO:0008083;GO:0008083;GO:0008083;GO:0008083;GO:0008201;GO:0008201;GO:0008201;GO:0008201;GO:0008284;GO:0008284;GO:0008284;GO:0009986;GO:0010469;GO:0016020;GO:…	K08523	heparin-binding EGF-like growth factor [Source:MGISymbol;Acc:MGI:96070]
MGP_C57BL6NJ_G0025289	12.965	2.19099	23.739	10.8348	3.43761	0.0219636	0.424187	19	9020807	9039416	-	6158	Ms4a1	GO:0005154;GO:0005515;GO:0005615;GO:0005634;GO:0005886;GO:0005886;GO:0005887;GO:0009617;GO:0009617;GO:0009897;GO:0009897;GO:0016020;GO:0016021;GO:0016021;GO:0023026;GO:0042113;GO:0070062;	K06466	membrane-spanning 4-domains, subfamily A, member 1[Source:MGI Symbol;Acc:MGI:88321]
MGP_C57BL6NJ_G0032470	49.0383	80.8519	17.2247	0.213041	-2.2308	0.0219805	0.424187	7	30383476	30394089	-	2391	Aplp1	GO:0008201;GO:0016020;GO:0016021;GO:0016021;GO:0046914;	K05639	amyloid beta (A4) precursor-like protein 1[Source:MGI Symbol;Acc:MGI:88046]
MGP_C57BL6NJ_G0025762	239.204	115.85	362.558	3.12955	1.64595	0.0220106	0.424187	2	9376870	9411254	+	4446	Il15ra	GO:0005576;GO:0005615;GO:0005634;GO:0005886;GO:0005886;GO:0007259;GO:0010977;GO:0016020;GO:0016021;GO:0031410;GO:0031965;GO:0032825;GO:0005886;GO:0031410;GO:0032825;	-	interleukin 15 receptor, alpha chain [Source:MGISymbol;Acc:MGI:104644]
MGP_C57BL6NJ_G0031372	334.362	642.727	25.9976	0.0404489	-4.62776	0.0220153	0.424187	6	86845432	86870785	-	1557	Actg2	GO:0000166;GO:0005524;GO:0005615;GO:0005737;GO:0005737;GO:0005856;GO:0010628;GO:0030027;GO:0030175;GO:0032982;GO:0044297;GO:0070062;GO:0071944;GO:0071944;GO:0072562;GO:0090131;	K12315	actin, gamma 2, smooth muscle, enteric [Source:MGISymbol;Acc:MGI:104589]
MGP_C57BL6NJ_G0034748	43.3011	82.7418	3.86047	0.0466568	-4.42177	0.0221265	0.425063	8	131275472	131286601	+	1868	Tubb3	GO:0000166;GO:0000226;GO:0000278;GO:0000278;GO:0003924;GO:0005200;GO:0005200;GO:0005515;GO:0005515;GO:0005515;GO:0005525;GO:0005525;GO:0005525;GO:0005622;GO:0005622;GO:0005634;GO:0005737;GO:0005737;GO:0005737;GO:0005737;GO:0005856;GO:0005874;GO:0005874;GO:0005874;GO:0005874;GO:0007010;GO:0007017;GO:0007017;GO:0007411;GO:0007411;GO:0007411;GO:0007411;GO:0015630;GO:0015630;GO:0030182;GO:0030182;GO:…	K07375	tubulin, beta 3 class III [Source:MGISymbol;Acc:MGI:107813]
MGP_C57BL6NJ_G0033031	975.716	1800.3	151.134	0.0839496	-3.57433	0.0221424	0.425063	7	106048530	106056288	-	2123	Serpinh1	GO:0003433;GO:0003433;GO:0003723;GO:0004867;GO:0004867;GO:0005515;GO:0005518;GO:0005518;GO:0005615;GO:0005737;GO:0005737;GO:0005783;GO:0005783;GO:0005783;GO:0005783;GO:0005788;GO:0005793;GO:0010951;GO:0010951;GO:0030199;GO:0030199;GO:0030199;GO:0032964;GO:0032964;GO:0045121;GO:0051082;GO:0051082;GO:0051604;GO:0051604;GO:0062023;GO:0070062;	K09501	serine (or cysteine) peptidase inhibitor, clade H,member 1 [Source:MGI Symbol;Acc:MGI:88283]
MGP_C57BL6NJ_G0028308	133.701	249.271	18.1312	0.0727371	-3.78117	0.0221452	0.425063	3	140423352	140492214	-	4989	Npnt	GO:0001657;GO:0001658;GO:0005178;GO:0005178;GO:0005509;GO:0005576;GO:0005576;GO:0005578;GO:0005578;GO:0005604;GO:0005604;GO:0005615;GO:0007155;GO:0007160;GO:0007275;GO:0010694;GO:0010811;GO:0016020;GO:0030154;GO:0030198;GO:0030485;GO:0030511;GO:0031012;GO:0031012;GO:0033631;GO:0034678;GO:0045184;GO:0045669;GO:0045987;GO:0062023;GO:0070062;GO:0070374;GO:0071356;GO:0097195;GO:2000721;GO:0001657;GO:…	-	nephronectin [Source:MGI Symbol;Acc:MGI:2148811]"
MGP_C57BL6NJ_G0025470	3523.36	6604.43	442.304	0.0669709	-3.90032	0.0222284	0.425696	19	33921975	33936222	-	1781	Acta2	GO:0000166;GO:0001725;GO:0005515;GO:0005524;GO:0005615;GO:0005737;GO:0005737;GO:0005737;GO:0005856;GO:0005856;GO:0005856;GO:0006936;GO:0008217;GO:0008217;GO:0010628;GO:0014829;GO:0014829;GO:0015629;GO:0015629;GO:0019901;GO:0019901;GO:0030027;GO:0030175;GO:0030485;GO:0030485;GO:0044297;GO:0061041;GO:0061870;GO:0061874;GO:0070062;GO:0070374;GO:0090131;GO:2000491;	K12313	actin, alpha 2, smooth muscle, aorta [Source:MGISymbol;Acc:MGI:87909]
MGP_C57BL6NJ_G0028407	9.06434	17.6943	0.434328	0.0245461	-5.34836	0.0222345	0.425696	3	161477178	161695823	-	3404	Ak5	GO:0000166;GO:0004017;GO:0004017;GO:0004550;GO:0004550;GO:0005524;GO:0005524;GO:0005737;GO:0005737;GO:0005815;GO:0005829;GO:0006139;GO:0006165;GO:0006165;GO:0009142;GO:0009142;GO:0009165;GO:0016301;GO:0016310;GO:0016740;GO:0019205;GO:0019206;GO:0046034;GO:0046940;	K00939	adenylate kinase 5 [Source:MGISymbol;Acc:MGI:2677491]
MGP_C57BL6NJ_G0028794	192.998	88.6256	297.371	3.35537	1.74647	0.0223206	0.426804	4	64892887	64912587	-	3323	Tnfsf15	GO:0005125;GO:0005164;GO:0005576;GO:0005615;GO:0005622;GO:0006915;GO:0006955;GO:0007165;GO:0010469;GO:0016020;GO:0016020;GO:0016021;	K05478	tumor necrosis factor (ligand) superfamily, member15 [Source:MGI Symbol;Acc:MGI:2180140]
MGP_C57BL6NJ_G0027071	6.87837	13.7567	0	0	-Inf	0.0224489	0.428714	2	160979432	161015391	+	2335	Angpt4	GO:0001525;GO:0001525;GO:0005172;GO:0005576;GO:0005615;GO:0007171;GO:0007219;GO:0007219;GO:0007492;GO:0010595;GO:0016525;GO:0030297;GO:0030971;GO:0030971;GO:0043066;GO:0043536;GO:0043537;GO:0045766;GO:0048014;GO:0050731;	K05467	angiopoietin 4 [Source:MGI Symbol;Acc:MGI:1336887]"
MGP_C57BL6NJ_G0029605	792.691	1190.97	394.417	0.331175	-1.59434	0.0225444	0.42994	4	161877994	161995012	+	2124	Acot7	GO:0000062;GO:0000062;GO:0005654;GO:0005654;GO:0005737;GO:0005829;GO:0005829;GO:0006637;GO:0009062;GO:0009062;GO:0015937;GO:0015937;GO:0016290;GO:0016290;GO:0016290;GO:0016787;GO:0036042;GO:0036042;GO:0036114;GO:0036114;GO:0036116;GO:0036116;GO:0042803;GO:0042803;GO:0043005;GO:0043005;GO:0044297;GO:0047617;GO:0047617;GO:0051792;GO:0051792;GO:0052689;GO:0070062;GO:0102991;GO:1900535;GO:1900535;	K17360	acyl-CoA thioesterase 7 [Source:MGISymbol;Acc:MGI:1917275]
MGP_C57BL6NJ_G0031499	41.1254	76.6046	5.64626	0.0737066	-3.76206	0.02257	0.42994	6	96860025	97039848	-	13502	Adamts9	GO:0003179;GO:0003179;GO:0003229;GO:0003229;GO:0004175;GO:0004175;GO:0004222;GO:0005578;GO:0005615;GO:0005615;GO:0005783;GO:0006508;GO:0006508;GO:0006508;GO:0008237;GO:0008237;GO:0008270;GO:0009617;GO:0009617;GO:0009986;GO:0009986;GO:0010596;GO:0010596;GO:0030198;GO:0030198;GO:0031012;GO:0035909;GO:0035909;GO:0043231;GO:0045636;GO:0045636;GO:0046872;GO:0048070;GO:0048070;GO:0090673;GO:0090673;GO:…	K08624	a disintegrin-like and metallopeptidase (reprolysintype) with thrombospondin type 1 motif, 9 [Source:MGISymbol;Acc:MGI:1916320]
MGP_C57BL6NJ_G0021550	49.7788	91.3215	8.23607	0.0901876	-3.47093	0.0226151	0.430257	14	28480238	28494816	+	1880	Anxa8	GO:0005509;GO:0005509;GO:0005544;GO:0005544;GO:0005544;GO:0005546;GO:0005547;GO:0005829;GO:0005886;GO:0007032;GO:0007596;GO:0007599;GO:0016197;GO:0031902;GO:0043325;GO:0046872;GO:0051015;GO:0070062;GO:1900004;GO:1900138;	K17096	annexin A8 [Source:MGI Symbol;Acc:MGI:1201374]"
MGP_C57BL6NJ_G0019823	264.905	404.21	125.6	0.31073	-1.68627	0.0226794	0.430937	11	124354175	124399434	-	5288	Ube2o	-	K10581	ubiquitin-conjugating enzyme E2O [Source:MGISymbol;Acc:MGI:2444266]
MGP_C57BL6NJ_G0027379	317.407	589.03	45.785	0.0777295	-3.68539	0.0228065	0.432355	2	184649844	184705370	-	4913	Pmepa1	GO:0010991;GO:0016020;GO:0016021;GO:0030512;GO:0070412;	-	prostate transmembrane protein, androgen induced 1[Source:MGI Symbol;Acc:MGI:1929600]
MGP_C57BL6NJ_G0017853	63.8642	113.506	14.222	0.125296	-2.99658	0.0228131	0.432355	10	83095071	83101542	+	2445	Fstl3	GO:0001503;GO:0001968;GO:0002244;GO:0005576;GO:0005615;GO:0005615;GO:0005615;GO:0005634;GO:0005634;GO:0005654;GO:0005794;GO:0006351;GO:0006355;GO:0006357;GO:0022409;GO:0030141;GO:0030514;GO:0030514;GO:0032926;GO:0044306;GO:0045671;GO:0045944;GO:0048185;GO:0048185;GO:0090101;	-	follistatin-like 3 [Source:MGISymbol;Acc:MGI:1890391]
MGP_C57BL6NJ_G0036757	2814.33	1431.89	4196.78	2.93094	1.55136	0.0228399	0.432355	X	170208669	170226479	-	3586	Tlr8	GO:0001774;GO:0001932;GO:0001932;GO:0002224;GO:0002224;GO:0002376;GO:0002755;GO:0003677;GO:0003677;GO:0003677;GO:0003723;GO:0003725;GO:0003725;GO:0003725;GO:0003727;GO:0003727;GO:0003727;GO:0004872;GO:0004888;GO:0005515;GO:0005622;GO:0005886;GO:0005887;GO:0006954;GO:0006954;GO:0006954;GO:0006955;GO:0007165;GO:0007249;GO:0007249;GO:0008144;GO:0008329;GO:0009615;GO:0009897;GO:0016020;GO:0016021;GO:…	K10170	toll-like receptor 8 [Source:MGISymbol;Acc:MGI:2176887]
MGP_C57BL6NJ_G0026256	286.991	134.842	439.141	3.25671	1.70342	0.0229606	0.434097	2	75807649	75853866	-	6679	Gpr155	GO:0003674;GO:0005622;GO:0005737;GO:0016020;GO:0016021;GO:0016021;GO:0035556;GO:0050890;GO:0055085;GO:0070062;	-	G protein-coupled receptor 155 [Source:MGISymbol;Acc:MGI:1915776]
MGP_C57BL6NJ_G0019955	389.377	635.282	143.471	0.225838	-2.14664	0.0230883	0.435964	12	1016411	1110830	+	6246	Adcy3	GO:0004016;GO:0005929;GO:0006171;GO:0007189;GO:0007338;GO:0007340;GO:0007608;GO:0008355;GO:0016021;GO:0030317;GO:1904322;	K08043	adenylate cyclase 3 [Source:MGISymbol;Acc:MGI:99675]
MGP_C57BL6NJ_G0024096	16.1891	31.5096	0.868656	0.0275679	-5.18086	0.0231244	0.436102	17	38958064	38967615	+	3786	Zfp57	GO:0000122;GO:0003676;GO:0003677;GO:0003677;GO:0005515;GO:0005622;GO:0005634;GO:0005634;GO:0005634;GO:0005720;GO:0006349;GO:0006349;GO:0006351;GO:0006355;GO:0006355;GO:0007275;GO:0043045;GO:0043045;GO:0046872;GO:0000122;GO:0003677;GO:0005634;GO:0005720;GO:0006349;GO:0043045;	K09228	zinc finger protein 57 [Source:MGISymbol;Acc:MGI:99204]
MGP_C57BL6NJ_G0024037	155.395	71.3818	239.408	3.35391	1.74584	0.023201	0.436953	17	36740528	36745635	+	2510	Atp6v1g2	GO:0008553;GO:0016471;GO:0016887;GO:0030285;	-	ATPase, H+ transporting, lysosomal V1 subunit G2[Source:MGI Symbol;Acc:MGI:1913487]
MGP_C57BL6NJ_G0022274	1781.52	932.424	2630.62	2.82127	1.49635	0.0232395	0.436953	15	59485526	59532866	-	5683	Atad2	GO:0005524;GO:0006325;GO:0006355;GO:0016887;	K22531	ATPase family, AAA domain containing 2 [Source:MGISymbol;Acc:MGI:1917722]
MGP_C57BL6NJ_G0027191	613.054	1142.52	83.5848	0.073158	-3.77284	0.0232564	0.436953	2	166415950	166423143	+	1162	Myl9	GO:0001725;GO:0001725;GO:0005509;GO:0016459;GO:0016460;GO:0016460;GO:0030018;GO:0030018;GO:0032036;GO:0032036;GO:0046872;GO:0070527;	K12755	myosin, light polypeptide 9, regulatory [Source:MGISymbol;Acc:MGI:2138915]
MGP_C57BL6NJ_G0027463	340.415	639.2	41.6305	0.0651291	-3.94055	0.0233058	0.437338	3	2455002	2654440	+	15737	Zfhx4	GO:0003676;GO:0003677;GO:0003677;GO:0005634;GO:0006355;GO:0008270;GO:0043565;GO:0046872;GO:0046983;	K09380	zinc finger homeodomain 4 [Source:MGISymbol;Acc:MGI:2137668]
MGP_C57BL6NJ_G0030344	193.766	324.52	63.0107	0.194166	-2.36464	0.0233427	0.437488	5	120218306	120305122	-	6150	2900026A02Rik	GO:0003674;GO:0005575;GO:0008150;	-	RIKEN cDNA 2900026A02 gene [Source:MGISymbol;Acc:MGI:1920194]
MGP_C57BL6NJ_G0016858	46.9698	17.6063	76.3333	4.33556	2.11622	0.0234148	0.437833	1	139981463	139993432	+	2191	Fam72a	GO:0003674;GO:0005737;GO:0005739;GO:0005829;GO:0005829;GO:0016020;GO:0016020;GO:0031552;GO:0043065;GO:0043231;	-	family with sequence similarity 72, member A[Source:MGI Symbol;Acc:MGI:1919669]
MGP_C57BL6NJ_G0031615	407.867	755.265	60.4691	0.0800634	-3.64271	0.0234678	0.437833	6	122914398	122927229	+	8176	Cxcl12	GO:0001569;GO:0001667;GO:0001764;GO:0001938;GO:0005125;GO:0005178;GO:0005178;GO:0005576;GO:0005576;GO:0005615;GO:0005615;GO:0005737;GO:0005886;GO:0006935;GO:0006935;GO:0006952;GO:0006955;GO:0007281;GO:0007420;GO:0008009;GO:0008009;GO:0008009;GO:0008045;GO:0008083;GO:0008284;GO:0008344;GO:0008354;GO:0009897;GO:0009897;GO:0010469;GO:0022029;GO:0030334;GO:0030335;GO:0030335;GO:0031100;GO:0033603;GO:…	K10031	chemokine (C-X-C motif) ligand 12 [Source:MGISymbol;Acc:MGI:103556]
MGP_C57BL6NJ_G0030252	19.3254	4.08203	34.5687	8.46852	3.08211	0.0234724	0.437833	5	111581837	111605106	-	3045	-	-	K20908	-
MGP_C57BL6NJ_G0023205	65.2971	27.3447	103.25	3.77586	1.9168	0.0234878	0.437833	16	36005285	36042060	-	7264	Slc15a2	GO:0005215;GO:0006810;GO:0006857;GO:0016020;GO:0016020;GO:0016021;GO:0016021;GO:0022857;GO:0035672;GO:0035673;GO:0055085;	K14637	solute carrier family 15 (H+/peptide transporter),member 2 [Source:MGI Symbol;Acc:MGI:1890457]
MGP_C57BL6NJ_G0028826	87.0704	161.565	12.5761	0.0778394	-3.68335	0.0235061	0.437833	4	87195764	87604177	-	8174	Bnc2	GO:0003416;GO:0003416;GO:0003676;GO:0003677;GO:0003677;GO:0005634;GO:0005634;GO:0005634;GO:0005654;GO:0005829;GO:0005886;GO:0006351;GO:0006355;GO:0008270;GO:0043586;GO:0043586;GO:0046872;GO:0060021;GO:0060021;GO:0060485;GO:0060485;	-	basonuclin 2 [Source:MGI Symbol;Acc:MGI:2443805]"
MGP_C57BL6NJ_G0026835	17.8109	32.1795	3.4423	0.106972	-3.2247	0.0235365	0.43786	2	129418516	129438798	-	2305	-	-	-	-
MGP_C57BL6NJ_G0036715	23.1004	43.6434	2.55749	0.0585997	-4.09296	0.0236682	0.438479	X	163031320	163145068	+	5278	Adgrg2	GO:0004871;GO:0004888;GO:0004930;GO:0004930;GO:0004930;GO:0005829;GO:0005886;GO:0005886;GO:0005887;GO:0007165;GO:0007166;GO:0007186;GO:0007186;GO:0007189;GO:0009986;GO:0016020;GO:0016021;GO:0016021;GO:0016324;GO:0016324;GO:0070062;	K08451	adhesion G protein-coupled receptor G2 [Source:MGISymbol;Acc:MGI:2446854]
MGP_C57BL6NJ_G0021881	14.984	28.6651	1.30298	0.0454555	-4.4594	0.023691	0.438479	14	62570425	62639289	-	4227	Fzd3	GO:0001736;GO:0001736;GO:0001764;GO:0001764;GO:0001843;GO:0001843;GO:0001942;GO:0001942;GO:0002052;GO:0002052;GO:0004871;GO:0004888;GO:0004930;GO:0004930;GO:0005515;GO:0005515;GO:0005737;GO:0005886;GO:0005886;GO:0005886;GO:0005886;GO:0005886;GO:0005886;GO:0007165;GO:0007166;GO:0007186;GO:0007275;GO:0007399;GO:0009986;GO:0016020;GO:0016020;GO:0016021;GO:0016021;GO:0016021;GO:0016055;GO:0016055;GO:…	K02329	frizzled class receptor 3 [Source:MGISymbol;Acc:MGI:108476]
MGP_C57BL6NJ_G0035267	406.31	755.601	57.019	0.0754618	-3.72811	0.0236965	0.438479	9	49700289	50012557	-	8001	Ncam1	GO:0007155;GO:0016020;GO:0016020;GO:0016021;	K06491	neural cell adhesion molecule 1 [Source:MGISymbol;Acc:MGI:97281]
MGP_C57BL6NJ_G0020049	646.738	1198.65	94.8214	0.0791065	-3.66006	0.0237034	0.438479	12	30106032	30170250	+	9788	Lamb1	-	-	laminin B1 [Source:MGI Symbol;Acc:MGI:96743]"
MGP_C57BL6NJ_G0018896	294.354	536.452	52.2563	0.0974109	-3.35977	0.0237149	0.438479	11	71155485	71290224	+	10458	Myh10	GO:0000281;GO:0001701;GO:0001725;GO:0001764;GO:0001778;GO:0003279;GO:0005737;GO:0005819;GO:0005886;GO:0005903;GO:0005938;GO:0006887;GO:0006930;GO:0007097;GO:0007409;GO:0007411;GO:0007420;GO:0007507;GO:0007512;GO:0008283;GO:0008360;GO:0016459;GO:0016460;GO:0021592;GO:0021670;GO:0021678;GO:0021680;GO:0030036;GO:0030239;GO:0030424;GO:0030426;GO:0031175;GO:0031594;GO:0035904;GO:0043005;GO:0043025;GO:…	K10352	myosin, heavy polypeptide 10, non-muscle[Source:MGI Symbol;Acc:MGI:1930780]
MGP_C57BL6NJ_G0024437	522.748	956.741	88.7557	0.0927688	-3.43022	0.0237483	0.438559	17	80480081	80894001	+	10094	Ltbp1	GO:0001527;GO:0003281;GO:0003281;GO:0005201;GO:0005509;GO:0005576;GO:0005576;GO:0005578;GO:0005578;GO:0005615;GO:0005615;GO:0005615;GO:0005737;GO:0005739;GO:0007179;GO:0019838;GO:0030425;GO:0031012;GO:0031012;GO:0032967;GO:0032991;GO:0035904;GO:0035904;GO:0038045;GO:0043025;GO:0043234;GO:0048471;GO:0050431;GO:0050436;GO:0060976;GO:0060976;GO:0062023;GO:0062023;	K19559	latent transforming growth factor beta bindingprotein 1 [Source:MGI Symbol;Acc:MGI:109151]
MGP_C57BL6NJ_G0025982	58.0177	99.7045	16.3309	0.163793	-2.61005	0.023817	0.438869	2	29438466	29440569	-	2104	Dolk	GO:0004168;GO:0004168;GO:0004168;GO:0004168;GO:0005783;GO:0005789;GO:0006486;GO:0016020;GO:0016021;GO:0016301;GO:0016310;GO:0016740;GO:0030176;GO:0030176;GO:0030176;GO:0043048;GO:0043048;GO:0043048;GO:0043048;	K00902	dolichol kinase [Source:MGISymbol;Acc:MGI:2677836]
MGP_C57BL6NJ_G0016537	131.54	203.669	59.411	0.291704	-1.77742	0.0238309	0.438869	1	77780348	77859412	+	7832	Pnkd	GO:0004416;GO:0005515;GO:0005634;GO:0005737;GO:0005739;GO:0005739;GO:0016020;GO:0016020;GO:0016021;GO:0016787;GO:0019243;GO:0032225;GO:0042053;GO:0046872;GO:0046929;GO:0050884;GO:0005739;GO:0032225;GO:0042053;GO:0046929;GO:0050884;	-	paroxysmal nonkinesiogenic dyskinesia [Source:MGISymbol;Acc:MGI:1930773]
MGP_C57BL6NJ_G0016384	3145.92	5861.12	430.72	0.0734876	-3.76635	0.023887	0.438869	1	46259870	46404834	-	9591	Col5a2	GO:0001501;GO:0001501;GO:0001501;GO:0005201;GO:0005201;GO:0005576;GO:0005578;GO:0005581;GO:0005581;GO:0005581;GO:0005581;GO:0005588;GO:0005588;GO:0005615;GO:0005615;GO:0005615;GO:0030020;GO:0030198;GO:0030199;GO:0030199;GO:0030199;GO:0030199;GO:0030903;GO:0031012;GO:0031012;GO:0031012;GO:0031012;GO:0043588;GO:0043588;GO:0043588;GO:0043588;GO:0046332;GO:0046332;GO:0046872;GO:0048592;GO:0062023;GO:…	K19721	collagen, type V, alpha 2 [Source:MGISymbol;Acc:MGI:88458]
MGP_C57BL6NJ_G0028396	19.8111	4.34577	35.2764	8.11741	3.02102	0.0238999	0.438869	3	160384358	160501128	+	4585	Adgrl4	GO:0004871;GO:0004888;GO:0004930;GO:0004930;GO:0004930;GO:0005509;GO:0005886;GO:0005886;GO:0005887;GO:0007165;GO:0007166;GO:0007186;GO:0007186;GO:0007189;GO:0016020;GO:0016021;GO:0016021;GO:0031410;GO:0031410;GO:0046983;	K04595	adhesion G protein-coupled receptor L4 [Source:MGISymbol;Acc:MGI:2655562]
MGP_C57BL6NJ_G0016522	66.1509	106.46	25.8421	0.242741	-2.04251	0.0239518	0.438869	1	75627664	75719699	+	2848	Xrcc5	GO:0000166;GO:0000723;GO:0000723;GO:0000784;GO:0000784;GO:0002218;GO:0002376;GO:0003677;GO:0003677;GO:0003684;GO:0003690;GO:0003691;GO:0003723;GO:0003723;GO:0004003;GO:0004386;GO:0005515;GO:0005524;GO:0005634;GO:0005634;GO:0005634;GO:0005634;GO:0005654;GO:0005694;GO:0005730;GO:0005737;GO:0005737;GO:0005886;GO:0006281;GO:0006302;GO:0006302;GO:0006303;GO:0006303;GO:0006303;GO:0006303;GO:0006310;GO:…	K10885	X-ray repair complementing defective repair inChinese hamster cells 5 [Source:MGISymbol;Acc:MGI:104517]
MGP_C57BL6NJ_G0027419	5.63171	0	11.2634	Inf	Inf	0.0240104	0.438869	2	192529440	192556874	+	3853	Col9a3	GO:0005201;GO:0005581;GO:0005594;GO:0005594;GO:0005615;GO:0008584;GO:0008584;GO:0008584;GO:0008585;GO:0008585;GO:0008585;GO:0030020;GO:0030198;GO:0031012;GO:0062023;	K08131	collagen, type IX, alpha 3 [Source:MGISymbol;Acc:MGI:894686]
MGP_C57BL6NJ_G0016624	5.63074	0	11.2615	Inf	Inf	0.024018	0.438869	1	90056263	90061315	-	494	-	-	#N/A	-
MGP_C57BL6NJ_G0020983	273.324	509.818	36.8303	0.072242	-3.79102	0.0240208	0.438869	13	56618166	56633821	-	4465	-	-	-	-
MGP_C57BL6NJ_G0022586	881.736	1322.11	441.36	0.333829	-1.58282	0.0240265	0.438869	15	88237604	88337727	+	4079	Parvb	GO:0003779;GO:0003779;GO:0003779;GO:0005515;GO:0005737;GO:0005737;GO:0005856;GO:0005886;GO:0005925;GO:0005925;GO:0005925;GO:0007155;GO:0007155;GO:0007163;GO:0015629;GO:0016020;GO:0030017;GO:0030018;GO:0030027;GO:0030027;GO:0030027;GO:0030031;GO:0030031;GO:0030031;GO:0030032;GO:0030032;GO:0030032;GO:0030054;GO:0031532;GO:0031532;GO:0031532;GO:0031532;GO:0034446;GO:0042995;GO:0071963;GO:0071963;	K06275	parvin, beta [Source:MGI Symbol;Acc:MGI:2153063]"
MGP_C57BL6NJ_G0018238	103.898	47.1224	160.674	3.40972	1.76965	0.0240582	0.438916	10	136155105	136177237	+	3926	Prim1	GO:0003697;GO:0003896;GO:0003896;GO:0003899;GO:0005515;GO:0005658;GO:0006260;GO:0006269;GO:0006269;GO:0006269;GO:0016020;GO:0016740;GO:0016779;GO:0046872;	K02684	DNA primase, p49 subunit [Source:MGISymbol;Acc:MGI:97757]
MGP_C57BL6NJ_G0036105	793.127	1469.86	116.391	0.079185	-3.65863	0.0243294	0.44333	X	16184043	16188612	+	888	Timp1	GO:0001775;GO:0002020;GO:0002020;GO:0002248;GO:0002248;GO:0004857;GO:0005125;GO:0005125;GO:0005576;GO:0005578;GO:0005578;GO:0005604;GO:0005604;GO:0005615;GO:0005615;GO:0005615;GO:0005615;GO:0005615;GO:0008083;GO:0008191;GO:0008191;GO:0008191;GO:0008191;GO:0008270;GO:0008284;GO:0008284;GO:0009725;GO:0010033;GO:0010466;GO:0010469;GO:0010951;GO:0010951;GO:0010951;GO:0030414;GO:0030414;GO:0031012;GO:…	K16451	tissue inhibitor of metalloproteinase 1 [Source:MGISymbol;Acc:MGI:98752]
MGP_C57BL6NJ_G0025482	526.908	268.328	785.489	2.92734	1.54959	0.0243957	0.443787	19	34704110	34762321	+	5677	Kif20b	GO:0000166;GO:0000922;GO:0001843;GO:0001843;GO:0003777;GO:0003777;GO:0005515;GO:0005515;GO:0005524;GO:0005524;GO:0005634;GO:0005634;GO:0005634;GO:0005634;GO:0005654;GO:0005654;GO:0005730;GO:0005730;GO:0005737;GO:0005737;GO:0005813;GO:0005813;GO:0005815;GO:0005819;GO:0005829;GO:0005856;GO:0005871;GO:0005874;GO:0005874;GO:0007018;GO:0007018;GO:0007049;GO:0007088;GO:0008017;GO:0008017;GO:0008017;GO:…	K10402	kinesin family member 20B [Source:MGISymbol;Acc:MGI:2444576]
MGP_C57BL6NJ_G0033831	283.767	145.535	421.998	2.89964	1.53587	0.0244133	0.443787	8	1790696	1835050	-	2132	Shcbp1	GO:0005515;GO:0005515;GO:0005515;GO:0005575;GO:0005737;GO:0005819;GO:0005856;GO:0008543;GO:0008543;GO:0030496;GO:0042169;GO:0042169;GO:2000177;GO:2000177;	-	Shc SH2-domain binding protein 1 [Source:MGISymbol;Acc:MGI:1338802]
MGP_C57BL6NJ_G0031625	63.4323	103.047	23.8172	0.231129	-2.11323	0.0244945	0.444729	6	124330959	124357904	-	5373	Zfp9	GO:0003674;GO:0003676;GO:0005575;GO:0005622;GO:0005634;GO:0006355;GO:0008150;GO:0046872;	K09228	zinc finger protein 9 [Source:MGISymbol;Acc:MGI:99210]
MGP_C57BL6NJ_G0028139	52.0937	17.9175	86.2698	4.81483	2.26748	0.0245619	0.445205	3	111316419	111326492	-	2865	I830077J02Rik	GO:0003674;GO:0005575;GO:0008150;GO:0016020;GO:0016021;	-	RIKEN cDNA I830077J02 gene [Source:MGISymbol;Acc:MGI:3588284]
MGP_C57BL6NJ_G0031569	97.02	41.0532	152.987	3.72655	1.89784	0.0245961	0.445205	6	119056959	119127204	+	7937	Fancd2	GO:0000793;GO:0000793;GO:0000793;GO:0005515;GO:0005515;GO:0005634;GO:0005634;GO:0005634;GO:0005634;GO:0005730;GO:0005829;GO:0006281;GO:0006281;GO:0006281;GO:0006974;GO:0006974;GO:0006974;GO:0007049;GO:0007129;GO:0007129;GO:0007275;GO:0007276;GO:0007276;GO:0010332;GO:0016604;GO:0034599;GO:0034599;GO:0045589;GO:0045589;GO:0048854;GO:0048854;GO:0050727;GO:0050727;GO:0051090;GO:0051090;GO:0070182;GO:…	K10891	Fanconi anemia, complementation group D2[Source:MGI Symbol;Acc:MGI:2448480]
MGP_C57BL6NJ_G0017125	158.122	245.591	70.6525	0.287683	-1.79745	0.0246114	0.445205	1	181451385	181471091	-	5104	Hsd17b7	GO:0000253;GO:0000253;GO:0000253;GO:0004303;GO:0005148;GO:0005783;GO:0005783;GO:0005886;GO:0006629;GO:0006694;GO:0006695;GO:0006695;GO:0006703;GO:0016020;GO:0016020;GO:0016021;GO:0016491;GO:0055114;GO:0000253;GO:0005783;GO:0006695;	K13373	hydroxysteroid (17-beta) dehydrogenase 7[Source:MGI Symbol;Acc:MGI:1330808]
MGP_C57BL6NJ_G0024446	1983.57	1029.48	2937.66	2.85355	1.51276	0.0246395	0.445205	17	84669649	84701328	-	5113	Eif2ak2	GO:0000166;GO:0000186;GO:0000186;GO:0001819;GO:0001819;GO:0002376;GO:0003723;GO:0003723;GO:0003725;GO:0003725;GO:0003725;GO:0004672;GO:0004672;GO:0004672;GO:0004672;GO:0004672;GO:0004674;GO:0004674;GO:0004694;GO:0004694;GO:0004713;GO:0004715;GO:0005515;GO:0005515;GO:0005515;GO:0005524;GO:0005524;GO:0005634;GO:0005634;GO:0005737;GO:0005737;GO:0005829;GO:0006351;GO:0006355;GO:0006412;GO:0006412;GO:…	K16195	eukaryotic translation initiation factor 2-alphakinase 2 [Source:MGI Symbol;Acc:MGI:1353449]
MGP_C57BL6NJ_G0021792	25.9837	6.152	45.8153	7.44722	2.8967	0.0246697	0.445205	14	52829583	52833552	-	934	Gzmc	GO:0004252;GO:0004252;GO:0005737;GO:0006508;GO:0006508;GO:0006508;GO:0008233;GO:0008236;GO:0008626;GO:0016787;GO:0019835;GO:0030141;	-	granzyme C [Source:MGI Symbol;Acc:MGI:109256]"
MGP_C57BL6NJ_G0029932	73.9687	136.66	11.277	0.0825185	-3.59914	0.0246976	0.445205	5	37619372	37709564	+	5837	Evc2	GO:0005515;GO:0005634;GO:0005634;GO:0005634;GO:0005737;GO:0005856;GO:0005886;GO:0005929;GO:0005929;GO:0007224;GO:0007224;GO:0007224;GO:0016020;GO:0016021;GO:0042995;GO:0060170;GO:0060170;GO:0060170;GO:0098797;GO:0098797;	K19608	Ellis van Creveld syndrome 2 [Source:MGISymbol;Acc:MGI:1915775]
MGP_C57BL6NJ_G0027890	41.1539	78.407	3.90087	0.0497516	-4.32911	0.0248073	0.44665	3	94268088	94274835	+	1617	S100a16	GO:0003723;GO:0005509;GO:0005509;GO:0005509;GO:0005615;GO:0005634;GO:0005634;GO:0005634;GO:0005730;GO:0005730;GO:0005737;GO:0005737;GO:0005737;GO:0005829;GO:0005886;GO:0042803;GO:0042803;GO:0046872;GO:0051592;GO:0051592;GO:0070062;	-	S100 calcium binding protein A16 [Source:MGISymbol;Acc:MGI:1915110]
MGP_C57BL6NJ_G0018181	139.03	221.155	56.9042	0.257304	-1.95845	0.0249106	0.447194	10	129326198	129601797	-	9132	Srgap1	GO:0005096;GO:0005096;GO:0005096;GO:0005515;GO:0005737;GO:0007165;GO:0007266;GO:0016477;GO:0017048;GO:0030336;GO:0043547;GO:0048365;	K07526	SLIT-ROBO Rho GTPase activating protein 1[Source:MGI Symbol;Acc:MGI:2152936]
MGP_C57BL6NJ_G0020350	2367.8	3568.32	1167.27	0.327122	-1.6121	0.0249214	0.447194	12	88878516	88922981	+	1878	Jdp2	GO:0000122;GO:0000122;GO:0000978;GO:0000978;GO:0001078;GO:0003677;GO:0003677;GO:0003677;GO:0003682;GO:0003690;GO:0003700;GO:0003700;GO:0005515;GO:0005634;GO:0005634;GO:0005634;GO:0005634;GO:0006351;GO:0006355;GO:0006355;GO:0006357;GO:0031063;GO:0031065;GO:0045599;GO:0046982;GO:0000122;GO:0000978;GO:0001078;GO:0003677;GO:0003682;GO:0005634;GO:0031065;GO:0045599;	K09033	Jun dimerization protein 2 [Source:MGISymbol;Acc:MGI:1932093]
MGP_C57BL6NJ_G0031424	585.923	1049.11	122.739	0.116993	-3.0955	0.0250046	0.447194	6	90861004	91065796	-	9533	Antxr1	GO:0001568;GO:0001568;GO:0004872;GO:0004888;GO:0004888;GO:0004888;GO:0005518;GO:0005518;GO:0005886;GO:0005886;GO:0007165;GO:0009897;GO:0009986;GO:0009986;GO:0016020;GO:0016021;GO:0016021;GO:0022414;GO:0022414;GO:0031258;GO:0031258;GO:0031527;GO:0031527;GO:0031532;GO:0031532;GO:0034446;GO:0034446;GO:0038023;GO:0042995;GO:0046872;GO:0051015;GO:0051015;GO:0070062;GO:1901202;GO:1901202;GO:1901998;GO:…	K20909	anthrax toxin receptor 1 [Source:MGISymbol;Acc:MGI:1916788]
MGP_C57BL6NJ_G0033875	832.898	1249.31	416.491	0.333378	-1.58477	0.025009	0.447194	8	11190240	11221524	-	2593	Gas6	GO:0001764;GO:0001764;GO:0001786;GO:0001786;GO:0001934;GO:0001934;GO:0001961;GO:0001961;GO:0003104;GO:0003104;GO:0005102;GO:0005102;GO:0005245;GO:0005245;GO:0005509;GO:0005576;GO:0005576;GO:0005615;GO:0005615;GO:0005615;GO:0005622;GO:0005737;GO:0005737;GO:0006468;GO:0006468;GO:0006909;GO:0006909;GO:0006915;GO:0007165;GO:0007167;GO:0007167;GO:0007596;GO:0007596;GO:0009267;GO:0009267;GO:0010469;GO:…	K05464	growth arrest specific 6 [Source:MGISymbol;Acc:MGI:95660]
MGP_C57BL6NJ_G0019363	5772.15	10662.8	881.454	0.082666	-3.59656	0.0250553	0.447194	11	100181204	100199590	+	6546	Col1a1	GO:0001501;GO:0001501;GO:0001501;GO:0001503;GO:0001568;GO:0001568;GO:0001568;GO:0001649;GO:0001649;GO:0001957;GO:0001957;GO:0001958;GO:0001958;GO:0002020;GO:0005201;GO:0005201;GO:0005201;GO:0005201;GO:0005515;GO:0005576;GO:0005576;GO:0005576;GO:0005578;GO:0005578;GO:0005578;GO:0005581;GO:0005581;GO:0005581;GO:0005584;GO:0005584;GO:0005584;GO:0005615;GO:0005615;GO:0005615;GO:0005615;GO:0005737;GO:…	K06236	collagen, type I, alpha 1 [Source:MGISymbol;Acc:MGI:88467]
MGP_C57BL6NJ_G0021907	19.8505	38.398	1.30298	0.0339336	-4.88114	0.0250563	0.447194	14	64775925	64989960	+	6928	Ebf2	GO:0000978;GO:0001077;GO:0001077;GO:0001709;GO:0003677;GO:0003677;GO:0003677;GO:0003682;GO:0003700;GO:0005515;GO:0005634;GO:0005634;GO:0006351;GO:0006355;GO:0006355;GO:0006366;GO:0007275;GO:0035563;GO:0045893;GO:0045944;GO:0045944;GO:0045944;GO:0046872;GO:0046983;GO:0050873;GO:0060612;GO:0120162;GO:0000978;GO:0001077;GO:0001709;GO:0003677;GO:0003682;GO:0035563;GO:0045893;GO:0045944;GO:0050873;GO:…	K09103	early B cell factor 2 [Source:MGISymbol;Acc:MGI:894332]
MGP_C57BL6NJ_G0023364	311.484	579.327	43.6408	0.0753302	-3.73063	0.0250739	0.447194	16	67293353	67340587	+	3322	Vgll3	GO:0005634;GO:0006355;	-	vestigial like family member 3 [Source:MGISymbol;Acc:MGI:1920819]
MGP_C57BL6NJ_G0034084	83.1249	34.6184	131.631	3.80236	1.92689	0.0250744	0.447194	8	47387043	47418299	+	3618	Cenpu	GO:0000775;GO:0000776;GO:0000777;GO:0005515;GO:0005634;GO:0005634;GO:0005634;GO:0005694;GO:0005737;GO:0005737;GO:0005815;GO:0005815;GO:0006351;GO:0006355;GO:0043009;GO:0005634;GO:0005737;GO:0043009;	-	centromere protein U [Source:MGISymbol;Acc:MGI:1919126]
MGP_C57BL6NJ_G0022066	225.768	416.496	35.0403	0.0841311	-3.57122	0.0251565	0.447356	14	123381411	123668476	+	5524	Farp1	GO:0005085;GO:0005089;GO:0005737;GO:0005829;GO:0005829;GO:0005856;GO:0005886;GO:0007275;GO:0007416;GO:0007416;GO:0008092;GO:0010923;GO:0016020;GO:0030054;GO:0030175;GO:0030425;GO:0030425;GO:0030676;GO:0030676;GO:0031234;GO:0031234;GO:0035023;GO:0042995;GO:0043005;GO:0043197;GO:0045202;GO:0048365;GO:0048813;GO:0048813;GO:0098890;GO:0098942;GO:0098974;GO:0098978;GO:1905606;	-	FERM, RhoGEF (Arhgef) and pleckstrin domain protein1 (chondrocyte-derived) [Source:MGISymbol;Acc:MGI:2446173]
MGP_C57BL6NJ_G0017043	122.563	224.777	20.35	0.0905345	-3.46539	0.0251619	0.447356	1	170877208	170947626	-	5817	Tnn	GO:0002076;GO:0002076;GO:0005178;GO:0005178;GO:0005576;GO:0005578;GO:0005578;GO:0005578;GO:0007160;GO:0007160;GO:0007409;GO:0007409;GO:0009986;GO:0009986;GO:0016049;GO:0016049;GO:0016477;GO:0016477;GO:0031012;GO:0031012;GO:0033689;GO:0033689;GO:0042802;GO:0042802;GO:0043005;GO:0043005;GO:0043025;GO:0043025;GO:0045668;GO:0045668;GO:0097442;GO:0097442;GO:1905240;GO:1905240;GO:1990026;GO:1990026;	K06252	tenascin N [Source:MGI Symbol;Acc:MGI:2665790]"
MGP_C57BL6NJ_G0026807	428.656	781.099	76.2125	0.0975709	-3.3574	0.0251723	0.447356	2	128246377	128267608	+	12171	Map1a	GO:0000226;GO:0000226;GO:0000226;GO:0001750;GO:0003779;GO:0003779;GO:0003779;GO:0005515;GO:0005515;GO:0005518;GO:0005737;GO:0005737;GO:0005829;GO:0005829;GO:0005856;GO:0005874;GO:0005874;GO:0005874;GO:0005875;GO:0005875;GO:0007026;GO:0007409;GO:0007605;GO:0007613;GO:0008017;GO:0008017;GO:0008017;GO:0008093;GO:0008306;GO:0014069;GO:0015631;GO:0015631;GO:0016358;GO:0030424;GO:0030425;GO:0030425;GO:…	K10429	microtubule-associated protein 1 A [Source:MGISymbol;Acc:MGI:1306776]
MGP_C57BL6NJ_G0019565	623.635	1135.22	112.049	0.0987024	-3.34077	0.0252409	0.447723	11	106959550	106974646	-	3566	Ptrf	GO:0003723;GO:0003723;GO:0005515;GO:0005634;GO:0005634;GO:0005634;GO:0005737;GO:0005737;GO:0005737;GO:0005739;GO:0005739;GO:0005783;GO:0005829;GO:0005886;GO:0005886;GO:0005901;GO:0005901;GO:0005901;GO:0005901;GO:0005901;GO:0006351;GO:0006353;GO:0006355;GO:0006361;GO:0006361;GO:0006361;GO:0006363;GO:0006363;GO:0006363;GO:0006363;GO:0009303;GO:0009303;GO:0016020;GO:0019843;GO:0032991;GO:0042134;GO:…	K19387	polymerase I and transcript release factor[Source:MGI Symbol;Acc:MGI:1277968]
MGP_C57BL6NJ_G0017784	1607.65	2960.14	255.158	0.0861979	-3.5362	0.0252522	0.447723	10	79676420	79695020	-	4380	Col6a1	GO:0001649;GO:0003429;GO:0005576;GO:0005576;GO:0005578;GO:0005578;GO:0005578;GO:0005581;GO:0005615;GO:0005615;GO:0005615;GO:0005765;GO:0007155;GO:0016020;GO:0030020;GO:0031012;GO:0031012;GO:0031012;GO:0031012;GO:0032991;GO:0042383;GO:0042383;GO:0043234;GO:0048407;GO:0062023;GO:0070062;GO:0070208;GO:0071230;GO:0071230;	K06238	collagen, type VI, alpha 1 [Source:MGISymbol;Acc:MGI:88459]
MGP_C57BL6NJ_G0031596	190.357	93.0752	287.638	3.09039	1.62779	0.0252846	0.447772	6	121508101	121520712	-	5280	Mbd4	GO:0003677;GO:0003677;GO:0003824;GO:0005634;GO:0005634;GO:0006281;GO:0006281;GO:0006284;GO:0006974;GO:0008263;GO:0016787;	K10801	methyl-CpG binding domain protein 4 [Source:MGISymbol;Acc:MGI:1333850]
MGP_C57BL6NJ_G0030354	80.6086	148.293	12.9241	0.0871526	-3.52031	0.0254418	0.449986	5	120992132	120998924	-	2315	Tmem119	GO:0001503;GO:0001503;GO:0001649;GO:0001649;GO:0005515;GO:0005737;GO:0005783;GO:0005783;GO:0005783;GO:0005789;GO:0005886;GO:0005886;GO:0005886;GO:0007283;GO:0007283;GO:0016020;GO:0016021;GO:0030154;GO:0030501;GO:0030501;GO:0030501;GO:0031214;GO:0033690;GO:0033690;GO:0033690;GO:0045669;GO:0045669;GO:0045669;GO:0048515;GO:0048515;GO:1903012;GO:1903012;	-	transmembrane protein 119 [Source:MGISymbol;Acc:MGI:2385228]
MGP_C57BL6NJ_G0019473	2801.91	1502.61	4101.21	2.7294	1.44858	0.0254692	0.449986	11	104756654	104791916	-	9014	Top2a	GO:0000166;GO:0000228;GO:0000287;GO:0000287;GO:0000712;GO:0000793;GO:0000819;GO:0002244;GO:0003677;GO:0003677;GO:0003677;GO:0003682;GO:0003723;GO:0003916;GO:0003916;GO:0003918;GO:0003918;GO:0003918;GO:0005080;GO:0005515;GO:0005524;GO:0005524;GO:0005524;GO:0005634;GO:0005634;GO:0005634;GO:0005654;GO:0005654;GO:0005730;GO:0005814;GO:0006259;GO:0006265;GO:0006265;GO:0006266;GO:0006974;GO:0007059;GO:…	K03164	topoisomerase (DNA) II alpha [Source:MGISymbol;Acc:MGI:98790]
MGP_C57BL6NJ_G0017425	501.73	251.351	752.109	2.99227	1.58124	0.0255251	0.450446	10	12179314	12327206	-	6505	Adgrg6	GO:0004871;GO:0004888;GO:0004930;GO:0004930;GO:0004930;GO:0004930;GO:0005515;GO:0005518;GO:0005622;GO:0005737;GO:0005886;GO:0005886;GO:0005887;GO:0007005;GO:0007005;GO:0007165;GO:0007166;GO:0007166;GO:0007186;GO:0007186;GO:0007189;GO:0007189;GO:0007189;GO:0009986;GO:0010579;GO:0010579;GO:0014037;GO:0016020;GO:0016020;GO:0016021;GO:0016021;GO:0019933;GO:0019933;GO:0022011;GO:0022011;GO:0022011;GO:…	K08463	adhesion G protein-coupled receptor G6 [Source:MGISymbol;Acc:MGI:1916151]
MGP_C57BL6NJ_G0032059	26.3785	50.6097	2.1474	0.0424306	-4.55875	0.025742	0.453744	7	4010910	4037439	-	13314	Peg3	GO:0000122;GO:0000122;GO:0003676;GO:0005634;GO:0005634;GO:0005737;GO:0005776;GO:0005776;GO:0006915;GO:0010468;GO:0010468;GO:0045944;GO:0045944;GO:0046872;	K09230	paternally expressed 3 [Source:MGISymbol;Acc:MGI:104748]
MGP_C57BL6NJ_G0018997	10.8635	1.56499	20.1619	12.8831	3.68741	0.0258093	0.453932	11	73339438	73342352	+	2718	Gp1ba	GO:0000902;GO:0000902;GO:0004860;GO:0005615;GO:0005737;GO:0005886;GO:0005887;GO:0006469;GO:0007155;GO:0007155;GO:0007155;GO:0007596;GO:0007596;GO:0007596;GO:0007596;GO:0007599;GO:0007599;GO:0007599;GO:0009986;GO:0016020;GO:0016020;GO:0016021;GO:0019221;GO:0031012;GO:0031362;GO:0031362;GO:0031362;GO:0042730;GO:0046426;GO:0070062;GO:0070527;GO:0070527;	K06261	glycoprotein 1b, alpha polypeptide [Source:MGISymbol;Acc:MGI:1333744]
MGP_C57BL6NJ_G0022081	63.7106	102.102	25.3196	0.247984	-2.01168	0.0258128	0.453932	14	125380062	125482341	-	1988	Ggact	GO:0003839;GO:0003839;GO:0016829;GO:0042219;GO:0042219;GO:0042219;GO:0061929;GO:0061929;GO:0061929;GO:0070062;	-	gamma-glutamylamine cyclotransferase [Source:MGISymbol;Acc:MGI:2385008]
MGP_C57BL6NJ_G0017126	786.94	1450.95	122.929	0.0847228	-3.56111	0.0259699	0.456164	1	181474157	181627258	-	8972	Ddr2	GO:0000166;GO:0001503;GO:0003416;GO:0003416;GO:0004672;GO:0004713;GO:0004713;GO:0004713;GO:0004714;GO:0004714;GO:0004714;GO:0004714;GO:0004888;GO:0005518;GO:0005518;GO:0005518;GO:0005518;GO:0005524;GO:0005524;GO:0005737;GO:0005886;GO:0005886;GO:0005887;GO:0005887;GO:0005925;GO:0006468;GO:0007169;GO:0007169;GO:0007169;GO:0008284;GO:0008284;GO:0009968;GO:0010763;GO:0010763;GO:0015629;GO:0016020;GO:…	K05125	discoidin domain receptor family, member 2[Source:MGI Symbol;Acc:MGI:1345277]
MGP_C57BL6NJ_G0027159	8.7302	17.0261	0.434328	0.0255096	-5.29282	0.0260259	0.456614	2	165019752	165049016	-	3264	Ggt7	GO:0000048;GO:0003674;GO:0005886;GO:0005886;GO:0006412;GO:0006508;GO:0006520;GO:0006536;GO:0006749;GO:0006749;GO:0006750;GO:0006751;GO:0006751;GO:0016020;GO:0016021;GO:0016740;GO:0016746;GO:0016787;GO:0019344;GO:0036374;GO:0036374;GO:0036374;GO:0102953;GO:0103068;GO:1902883;GO:1902883;	K00681	gamma-glutamyltransferase 7 [Source:MGISymbol;Acc:MGI:1913385]
MGP_C57BL6NJ_G0019831	53.4888	96.1576	10.8201	0.112524	-3.15169	0.0260559	0.456614	11	124688391	124716983	-	2455	Mxra7	GO:0003674;GO:0005575;GO:0008150;GO:0016020;GO:0016021;	-	matrix-remodelling associated 7 [Source:MGISymbol;Acc:MGI:1914872]
MGP_C57BL6NJ_G0020030	73.1293	138.016	8.24253	0.0597215	-4.06561	0.0261078	0.456936	12	25918494	25929686	-	8311	Sox11	GO:0000122;GO:0000122;GO:0000122;GO:0000122;GO:0000976;GO:0000976;GO:0000976;GO:0000978;GO:0000979;GO:0000981;GO:0001077;GO:0001077;GO:0001077;GO:0001077;GO:0001105;GO:0001105;GO:0001158;GO:0001158;GO:0001158;GO:0001501;GO:0001501;GO:0001841;GO:0001841;GO:0002089;GO:0002089;GO:0003151;GO:0003151;GO:0003211;GO:0003211;GO:0003357;GO:0003357;GO:0003357;GO:0003677;GO:0003700;GO:0003700;GO:0003700;GO:…	K09268	SRY (sex determining region Y)-box 11 [Source:MGISymbol;Acc:MGI:98359]
MGP_C57BL6NJ_G0016976	783.502	1415.91	151.098	0.106715	-3.22817	0.0261466	0.456936	1	160079479	160089284	+	4580	Ptgs2	GO:0001516;GO:0001516;GO:0001516;GO:0001516;GO:0001525;GO:0004601;GO:0004601;GO:0004666;GO:0004666;GO:0004666;GO:0004666;GO:0005515;GO:0005737;GO:0005737;GO:0005737;GO:0005783;GO:0005783;GO:0005789;GO:0005901;GO:0006629;GO:0006631;GO:0006633;GO:0006693;GO:0006954;GO:0006954;GO:0006979;GO:0007566;GO:0007566;GO:0007612;GO:0007613;GO:0008217;GO:0008217;GO:0008217;GO:0008284;GO:0008285;GO:0010575;GO:…	K11987	prostaglandin-endoperoxide synthase 2 [Source:MGISymbol;Acc:MGI:97798]
MGP_C57BL6NJ_G0019759	10468.2	5506.19	15430.2	2.80233	1.48663	0.0261651	0.456936	11	122517455	122529309	-	2645	Cd300ld	GO:0001618;GO:0001618;GO:0002376;GO:0005515;GO:0005886;GO:0005886;GO:0005886;GO:0016020;GO:0016021;GO:0032675;GO:0032675;GO:0032680;GO:0032680;GO:0046718;	K20395	CD300 molecule like family member d [Source:MGISymbol;Acc:MGI:2442358]
MGP_C57BL6NJ_G0018285	8.58812	16.7439	0.432387	0.0258236	-5.27516	0.0261955	0.45694	10	137208140	137232648	+	4013	Itga7	GO:0007155;GO:0007155;GO:0007229;GO:0008305;GO:0016020;GO:0016021;	K06583	integrin alpha 7 [Source:MGISymbol;Acc:MGI:102700]
MGP_C57BL6NJ_G0025301	8.09436	0.625996	15.5627	24.8607	4.6358	0.0262798	0.45788	19	9450654	9460102	-	2813	Ms4a2	GO:0005768;GO:0005887;GO:0005887;GO:0006954;GO:0006954;GO:0006955;GO:0007165;GO:0007166;GO:0007202;GO:0007205;GO:0009897;GO:0016020;GO:0016021;GO:0016021;GO:0019767;GO:0019863;GO:0019863;GO:0019901;GO:0032998;GO:0032998;GO:0038095;GO:0042169;GO:0043306;GO:0045121;GO:0050663;GO:0051219;GO:0051279;GO:0005887;GO:0007165;GO:0007166;GO:0009897;GO:0019863;GO:0032998;	-	membrane-spanning 4-domains, subfamily A, member 2[Source:MGI Symbol;Acc:MGI:95495]
MGP_C57BL6NJ_G0018009	3195.62	5899.97	491.282	0.0832687	-3.58608	0.0263158	0.457979	10	90202983	90252212	+	8144	Timp3	GO:0002020;GO:0004857;GO:0005576;GO:0005578;GO:0005604;GO:0005604;GO:0005615;GO:0005615;GO:0005615;GO:0005634;GO:0005737;GO:0008191;GO:0008191;GO:0008191;GO:0008270;GO:0009725;GO:0010033;GO:0010466;GO:0010951;GO:0030414;GO:0031012;GO:0031012;GO:0034097;GO:0045861;GO:0046872;GO:0051045;GO:0051045;GO:0070062;GO:0070373;GO:0071310;GO:0071310;GO:1903984;GO:1904684;GO:1904684;	K16866	tissue inhibitor of metalloproteinase 3 [Source:MGISymbol;Acc:MGI:98754]
MGP_C57BL6NJ_G0022691	107.729	195.129	20.3287	0.104181	-3.26283	0.026425	0.458856	15	103202444	103263366	-	5650	Vdr	GO:0000122;GO:0000791;GO:0000792;GO:0000902;GO:0000976;GO:0000977;GO:0000981;GO:0001501;GO:0001501;GO:0001651;GO:0003677;GO:0003677;GO:0003677;GO:0003677;GO:0003700;GO:0003700;GO:0003707;GO:0004879;GO:0004879;GO:0004879;GO:0005499;GO:0005499;GO:0005515;GO:0005515;GO:0005623;GO:0005634;GO:0005634;GO:0005634;GO:0005634;GO:0005654;GO:0005720;GO:0005737;GO:0005829;GO:0005901;GO:0006351;GO:0006355;GO:…	K08539	vitamin D receptor [Source:MGISymbol;Acc:MGI:103076]
MGP_C57BL6NJ_G0031753	49.1996	88.4514	9.94783	0.112467	-3.15243	0.0264269	0.458856	6	134948572	135143249	-	4760	Tspan9	GO:0003674;GO:0005886;GO:0005887;GO:0005925;GO:0007166;GO:0016020;GO:0016020;GO:0016021;GO:0016021;GO:0097197;	K17350	tetraspanin 9 [Source:MGI Symbol;Acc:MGI:1924558]"
MGP_C57BL6NJ_G0017978	6.68106	13.3621	0	0	-Inf	0.0266099	0.461367	10	86315549	86364215	-	5773	Glt8d2	GO:0016740;GO:0016757;	-	glycosyltransferase 8 domain containing 2[Source:MGI Symbol;Acc:MGI:1922032]
MGP_C57BL6NJ_G0016382	48.8843	92.1424	5.62622	0.06106	-4.03363	0.0266326	0.461367	1	45339235	45598586	+	3758	Gulp1	GO:0003674;GO:0005737;GO:0006810;GO:0006869;GO:0006909;GO:0006911;GO:0006915;	-	GULP, engulfment adaptor PTB domain containing 1[Source:MGI Symbol;Acc:MGI:1920407]
MGP_C57BL6NJ_G0031963	255.746	420.382	91.1088	0.216728	-2.20604	0.0266891	0.461781	7	428203	443494	-	2066	Tarm1	GO:0002250;GO:0002376;GO:0005886;GO:0005886;GO:0005886;GO:0016020;GO:0016021;GO:0034987;GO:0045087;GO:1900017;GO:1900017;GO:2000515;GO:2000562;GO:2000562;	-	T cell-interacting, activating receptor on myeloidcells 1 [Source:MGI Symbol;Acc:MGI:2442280]
MGP_C57BL6NJ_G0023650	431.394	223.189	639.6	2.86573	1.5189	0.0267281	0.461781	17	21797222	21921562	-	4333	Zfp994	GO:0003676;GO:0003700;GO:0005575;GO:0005622;GO:0006355;GO:0006355;GO:0046872;	-	zinc finger protein 994 [Source:MGISymbol;Acc:MGI:3643318]
MGP_C57BL6NJ_G0020625	25.338	43.7885	6.8875	0.15729	-2.6685	0.0267482	0.461781	13	11318919	11369055	+	3229	Gng4	-	K04541	guanine nucleotide binding protein (G protein),gamma 4 [Source:MGI Symbol;Acc:MGI:102703]
MGP_C57BL6NJ_G0016604	232.129	427.092	37.1664	0.0870219	-3.52248	0.0268417	0.462351	1	86344306	86404098	-	9147	Irs1	GO:0005158;GO:0005622;GO:0008286;	K16172	insulin receptor substrate 1 [Source:MGISymbol;Acc:MGI:99454]
MGP_C57BL6NJ_G0022427	6.6605	13.321	0	0	-Inf	0.0268424	0.462351	15	80055893	80067466	+	4366	Apol6	GO:0003674;GO:0005575;GO:0005576;GO:0006869;GO:0008150;GO:0008289;GO:0008289;GO:0016020;GO:0016021;GO:0042157;	-	apolipoprotein L 6 [Source:MGISymbol;Acc:MGI:1919189]
MGP_C57BL6NJ_G0017766	17.67	32.2996	3.0403	0.0941279	-3.40923	0.0269449	0.463587	10	78816877	78826157	-	2572	Mmp11	GO:0004222;GO:0005576;GO:0005578;GO:0005578;GO:0006508;GO:0006508;GO:0007275;GO:0008233;GO:0008237;GO:0008237;GO:0008237;GO:0008270;GO:0016787;GO:0030198;GO:0030199;GO:0030574;GO:0030574;GO:0031012;GO:0031012;GO:0045599;GO:0046872;GO:0071711;GO:0008237;GO:0030198;GO:0030199;GO:0030574;GO:0045599;GO:0071711;	-	matrix metallopeptidase 11 [Source:MGISymbol;Acc:MGI:97008]
MGP_C57BL6NJ_G0019317	609.765	917.727	301.802	0.328858	-1.60446	0.0269865	0.463774	11	92797334	93198169	-	10346	Msi2	GO:0003676;GO:0003723;GO:0003723;GO:0003723;GO:0003723;GO:0003727;GO:0005737;GO:0005737;GO:0005737;GO:0005844;GO:0005844;GO:0008266;GO:0048864;GO:1990904;GO:0003727;GO:0005737;GO:0005844;GO:0008266;GO:0048864;	K14411	musashi RNA-binding protein 2 [Source:MGISymbol;Acc:MGI:1923876]
MGP_C57BL6NJ_G0020933	73.1481	135.882	10.4142	0.0766412	-3.70574	0.0270251	0.46391	13	52174708	52188881	+	4482	S1pr3	GO:0001816;GO:0001816;GO:0003376;GO:0004871;GO:0004930;GO:0004930;GO:0004930;GO:0005178;GO:0005886;GO:0005886;GO:0005887;GO:0006954;GO:0006954;GO:0007165;GO:0007186;GO:0007186;GO:0007193;GO:0007193;GO:0007219;GO:0007219;GO:0016020;GO:0016021;GO:0016021;GO:0032651;GO:0032651;GO:0038036;GO:1903141;	K04290	sphingosine-1-phosphate receptor 3 [Source:MGISymbol;Acc:MGI:1339365]
MGP_C57BL6NJ_G0022136	113.259	210.562	15.9554	0.0757752	-3.72213	0.0270716	0.464005	15	8543143	8846237	+	6234	Adamts12	GO:0004222;GO:0004222;GO:0005576;GO:0005578;GO:0006508;GO:0006508;GO:0007160;GO:0008233;GO:0008233;GO:0008237;GO:0008237;GO:0008270;GO:0016477;GO:0016787;GO:0030167;GO:0031012;GO:0032331;GO:0046872;GO:0050727;GO:0051603;GO:0062023;GO:0071347;GO:0071356;GO:0071773;GO:1901509;GO:1902203;GO:1902548;GO:2001113;	K08626	a disintegrin-like and metallopeptidase (reprolysintype) with thrombospondin type 1 motif, 12 [Source:MGISymbol;Acc:MGI:2146046]
MGP_C57BL6NJ_G0032203	50.557	83.3377	17.7764	0.213306	-2.22901	0.0270921	0.464005	7	17919693	17926242	+	2556	Dmwd	GO:0003674;GO:0005575;GO:0005634;GO:0016579;GO:0030425;GO:0042995;GO:0043204;	-	dystrophia myotonica-containing WD repeat motif[Source:MGI Symbol;Acc:MGI:94907]
MGP_C57BL6NJ_G0022713	145.711	265.661	25.761	0.0969696	-3.36632	0.0272073	0.465312	15	104044028	104070075	-	6038	Adcy6	GO:0000166;GO:0004016;GO:0004016;GO:0005524;GO:0005622;GO:0005886;GO:0006171;GO:0006171;GO:0009190;GO:0016020;GO:0016021;GO:0016829;GO:0016849;GO:0035556;GO:0046872;	K08046	adenylate cyclase 6 [Source:MGISymbol;Acc:MGI:87917]
MGP_C57BL6NJ_G0034357	133.457	206.987	59.9265	0.289518	-1.78827	0.0272463	0.465312	8	88394025	88401445	-	3273	Mri1	GO:0001650;GO:0005634;GO:0005654;GO:0005737;GO:0005829;GO:0008652;GO:0009086;GO:0016853;GO:0019284;GO:0019509;GO:0019509;GO:0042802;GO:0044237;GO:0044249;GO:0046523;GO:0046523;	K08963	methylthioribose-1-phosphate isomerase 1[Source:MGI Symbol;Acc:MGI:1915123]
MGP_C57BL6NJ_G0029946	8.75716	0.625996	16.8883	26.9783	4.75373	0.0272681	0.465312	5	39096477	39268255	-	1719	Clnk	GO:0005515;GO:0005515;GO:0005622;GO:0006955;GO:0007169;GO:0007169;GO:0007169;GO:0035556;GO:0035556;	-	cytokine-dependent hematopoietic cell linker[Source:MGI Symbol;Acc:MGI:1351468]
MGP_C57BL6NJ_G0032755	4418.1	6558.46	2277.73	0.347297	-1.52576	0.0272916	0.465312	7	49511849	49525997	+	2982	Ldha	GO:0003824;GO:0004457;GO:0004459;GO:0004459;GO:0004459;GO:0005515;GO:0005634;GO:0005737;GO:0005737;GO:0005739;GO:0005829;GO:0005975;GO:0016020;GO:0016491;GO:0016491;GO:0016616;GO:0019244;GO:0019661;GO:0019752;GO:0031668;GO:0035686;GO:0045296;GO:0055114;GO:0055114;GO:0070062;	-	lactate dehydrogenase A [Source:MGISymbol;Acc:MGI:96759]
MGP_C57BL6NJ_G0034825	170.422	311.102	29.743	0.0956054	-3.38676	0.0273491	0.465411	9	4982387	5064884	-	9257	Yap1	GO:0000902;GO:0000978;GO:0000979;GO:0001076;GO:0001570;GO:0001894;GO:0003015;GO:0003143;GO:0003682;GO:0003713;GO:0003713;GO:0003714;GO:0005515;GO:0005515;GO:0005515;GO:0005634;GO:0005634;GO:0005667;GO:0005737;GO:0005737;GO:0005829;GO:0006351;GO:0006355;GO:0006461;GO:0006974;GO:0006975;GO:0008022;GO:0008283;GO:0008284;GO:0010468;GO:0010837;GO:0016020;GO:0030216;GO:0030857;GO:0030903;GO:0032570;GO:…	-	yes-associated protein 1 [Source:MGISymbol;Acc:MGI:103262]
MGP_C57BL6NJ_G0017696	5574.35	3071.52	8077.19	2.62971	1.3949	0.027359	0.465411	10	64144006	64179652	-	2196	Srgn	GO:0000139;GO:0005515;GO:0005518;GO:0005576;GO:0005615;GO:0005794;GO:0006915;GO:0008626;GO:0016485;GO:0016485;GO:0030502;GO:0030502;GO:0031214;GO:0033364;GO:0033364;GO:0033371;GO:0033371;GO:0033373;GO:0033373;GO:0033382;GO:0033382;GO:0042588;GO:0042629;GO:0042629;GO:0050710;GO:0050710;	K06849	serglycin [Source:MGI Symbol;Acc:MGI:97756]"
MGP_C57BL6NJ_G0019545	141.991	276.172	7.80982	0.0282789	-5.14413	0.0274017	0.465613	11	106379715	106392793	+	2935	Fkbp10	GO:0000412;GO:0000413;GO:0003755;GO:0003755;GO:0003755;GO:0003755;GO:0003755;GO:0005509;GO:0005515;GO:0005528;GO:0005528;GO:0005528;GO:0005528;GO:0005730;GO:0005737;GO:0005783;GO:0005788;GO:0005829;GO:0016020;GO:0016853;GO:0018208;GO:0018208;GO:0018208;GO:0046872;GO:0061077;	K09575	FK506 binding protein 10 [Source:MGISymbol;Acc:MGI:104769]
MGP_C57BL6NJ_G0022611	154.485	236.517	72.4528	0.306332	-1.70683	0.0274706	0.46626	15	90235280	90317471	+	5567	Gramd4	GO:0003674;GO:0005739;GO:0005739;GO:0006915;GO:0006915;GO:0016020;GO:0016021;GO:0031966;GO:0043280;	-	GRAM domain containing 4 [Source:MGISymbol;Acc:MGI:2676308]
MGP_C57BL6NJ_G0017387	99.9689	187.445	12.493	0.0666492	-3.90727	0.0275317	0.466397	10	3003770	3116198	-	8298	Rgs17	GO:0005096;GO:0005096;GO:0005634;GO:0005737;GO:0005886;GO:0007186;GO:0009968;GO:0016020;GO:0030054;GO:0031410;GO:0043005;GO:0043547;GO:0045202;	K16449	regulator of G-protein signaling 17 [Source:MGISymbol;Acc:MGI:1927469]
MGP_C57BL6NJ_G0021478	20.3053	38.0046	2.60597	0.0685698	-3.86628	0.0275405	0.466397	14	21495091	22394852	+	6229	Erc2	GO:0005515;GO:0005737;GO:0005856;GO:0014069;GO:0016020;GO:0030054;GO:0030165;GO:0030426;GO:0030426;GO:0032991;GO:0042734;GO:0042734;GO:0043005;GO:0043025;GO:0043195;GO:0044877;GO:0045202;GO:0045202;GO:0045202;GO:0048786;GO:0098831;	K19878	ELKS/RAB6-interacting/CAST family member 2[Source:MGI Symbol;Acc:MGI:1098749]
MGP_C57BL6NJ_G0029730	133.154	246.409	19.8989	0.0807555	-3.6303	0.0276078	0.466713	5	14536009	14996934	+	12215	Cacna2d1	GO:0005244;GO:0005245;GO:0005245;GO:0005262;GO:0005515;GO:0005515;GO:0005891;GO:0005891;GO:0006810;GO:0006811;GO:0006816;GO:0006816;GO:0016020;GO:0016021;GO:0016529;GO:0030315;GO:0034765;GO:0046872;GO:0051924;GO:0060307;GO:0060307;GO:0060402;GO:0060402;GO:0061577;GO:0061577;GO:0070062;GO:0070588;GO:0070588;GO:0070588;GO:0086002;GO:0086002;GO:0086048;GO:0086057;GO:0086091;GO:0086091;GO:0098903;GO:…	K04858	calcium channel, voltage-dependent, alpha2/deltasubunit 1 [Source:MGI Symbol;Acc:MGI:88295]
MGP_C57BL6NJ_G0028912	160.445	248.822	72.0676	0.289635	-1.78769	0.0276209	0.466713	4	105568530	105622706	+	5151	Ak4	GO:0000166;GO:0004017;GO:0004550;GO:0004550;GO:0005524;GO:0005524;GO:0005525;GO:0005739;GO:0005739;GO:0005739;GO:0005759;GO:0005759;GO:0006139;GO:0006165;GO:0006165;GO:0006172;GO:0009142;GO:0009142;GO:0016301;GO:0016310;GO:0016740;GO:0016776;GO:0019205;GO:0046033;GO:0046033;GO:0046034;GO:0046034;GO:0046039;GO:0046039;GO:0046899;GO:0046939;GO:0046940;GO:0070062;GO:0005739;GO:0005759;	K00939	adenylate kinase 4 [Source:MGISymbol;Acc:MGI:87979]
MGP_C57BL6NJ_G0033729	60.249	96.3676	24.1303	0.250399	-1.9977	0.0276649	0.466787	7	152015930	152019262	-	1606	Polr2l	GO:0001054;GO:0001055;GO:0001056;GO:0003677;GO:0003899;GO:0003899;GO:0005634;GO:0005634;GO:0005665;GO:0005665;GO:0005665;GO:0005666;GO:0005736;GO:0006351;GO:0006360;GO:0006366;GO:0006366;GO:0006383;GO:0008270;GO:0008270;GO:0046872;	K03007	polymerase (RNA) II (DNA directed) polypeptide L[Source:MGI Symbol;Acc:MGI:1913741]
MGP_C57BL6NJ_G0021443	74.145	117.722	30.5683	0.259666	-1.94527	0.0277136	0.466787	14	15316432	15322035	-	4213	Zfp503	GO:0003676;GO:0005634;GO:0006351;GO:0006355;GO:0008285;GO:0010629;GO:0046872;GO:0061351;GO:0061351;GO:0070315;GO:0070315;GO:0070315;	-	zinc finger protein 503 [Source:MGISymbol;Acc:MGI:1353644]
MGP_C57BL6NJ_G0026208	11.2991	22.5982	0	0	-Inf	0.0277454	0.466787	2	69461818	70070816	+	5753	B3galt1	GO:0000139;GO:0008499;GO:0009312;	-	UDP-Gal:betaGlcNAc beta 1,3-galactosyltransferase,polypeptide 1 [Source:MGI Symbol;Acc:MGI:1349403]
MGP_C57BL6NJ_G0032780	338.772	168.347	509.198	3.02469	1.59679	0.0277489	0.466787	7	51778869	51794036	-	5443	E2f8	GO:0000122;GO:0000122;GO:0000122;GO:0000978;GO:0000981;GO:0000987;GO:0001047;GO:0001077;GO:0001078;GO:0001078;GO:0001890;GO:0002040;GO:0002040;GO:0003677;GO:0003677;GO:0003700;GO:0003700;GO:0003700;GO:0003714;GO:0005634;GO:0005634;GO:0005667;GO:0005730;GO:0005829;GO:0006351;GO:0006355;GO:0006355;GO:0006366;GO:0007049;GO:0008134;GO:0008283;GO:0032466;GO:0032877;GO:0033301;GO:0042802;GO:0042803;GO:…	K09391	E2F transcription factor 8 [Source:MGISymbol;Acc:MGI:1922038]
MGP_C57BL6NJ_G0035218	5.39935	0	10.7987	Inf	Inf	0.0278175	0.46742	9	44797817	44803075	+	1323	Cd3d	GO:0002250;GO:0002376;GO:0004888;GO:0004888;GO:0005515;GO:0006461;GO:0007166;GO:0007166;GO:0009897;GO:0016020;GO:0016020;GO:0016021;GO:0030217;GO:0042101;GO:0042101;GO:0042101;GO:0042105;GO:0042105;GO:0042105;GO:0042110;GO:0042803;GO:0045059;GO:0045059;GO:0045059;GO:0046982;GO:0051260;GO:0065003;	K06450	CD3 antigen, delta polypeptide [Source:MGISymbol;Acc:MGI:88331]
MGP_C57BL6NJ_G0019670	4162.7	7722.47	602.922	0.0780738	-3.67902	0.0278915	0.467719	11	111108808	111169494	+	5901	Itgb3	GO:0001938;GO:0001954;GO:0001954;GO:0001968;GO:0001968;GO:0002020;GO:0002687;GO:0003756;GO:0004872;GO:0005080;GO:0005080;GO:0005178;GO:0005178;GO:0005178;GO:0005178;GO:0005515;GO:0005515;GO:0005634;GO:0005886;GO:0005886;GO:0005925;GO:0005925;GO:0005925;GO:0006874;GO:0007044;GO:0007044;GO:0007044;GO:0007155;GO:0007155;GO:0007155;GO:0007160;GO:0007160;GO:0007160;GO:0007160;GO:0007229;GO:0007229;GO:…	K06493	integrin beta 3 [Source:MGI Symbol;Acc:MGI:96612]"
MGP_C57BL6NJ_G0031005	1193.29	627.367	1759.21	2.80411	1.48754	0.0278972	0.467719	6	33977368	34093931	-	9779	Cnot4	-	-	CCR4-NOT transcription complex, subunit 4[Source:MGI Symbol;Acc:MGI:1859026]
MGP_C57BL6NJ_G0022912	179.708	274.53	84.8857	0.309204	-1.69337	0.0279788	0.468567	16	5476287	5490180	-	2827	Carhsp1	GO:0000177;GO:0000177;GO:0000932;GO:0003676;GO:0003677;GO:0003723;GO:0003730;GO:0003730;GO:0003730;GO:0005515;GO:0005737;GO:0005737;GO:0005737;GO:0005829;GO:0005829;GO:0006355;GO:0043186;GO:0043186;GO:0043488;GO:0043488;GO:0043488;GO:0070062;	-	calcium regulated heat stable protein 1 [Source:MGISymbol;Acc:MGI:1196368]
MGP_C57BL6NJ_G0025676	25.4361	6.86551	44.0066	6.40981	2.68028	0.0280968	0.470022	19	58023060	58100879	-	5505	Nrap	GO:0003779;GO:0003779;GO:0005515;GO:0005916;GO:0005927;GO:0017166;GO:0030016;GO:0030018;GO:0030036;GO:0046872;GO:0051015;GO:0051371;GO:0071691;GO:0003779;GO:0005916;GO:0005927;GO:0017166;GO:0030016;GO:0051371;	-	nebulin-related anchoring protein [Source:MGISymbol;Acc:MGI:1098765]
MGP_C57BL6NJ_G0019631	9.68132	19.3626	0	0	-Inf	0.0281698	0.470427	11	108890163	108893825	+	3663	Fzd2	GO:0003149;GO:0003149;GO:0003150;GO:0003150;GO:0003151;GO:0003151;GO:0004871;GO:0004888;GO:0004930;GO:0004930;GO:0005515;GO:0005515;GO:0005737;GO:0005886;GO:0005886;GO:0005886;GO:0005925;GO:0007165;GO:0007166;GO:0007186;GO:0007199;GO:0007204;GO:0007223;GO:0007267;GO:0007267;GO:0007275;GO:0007608;GO:0007608;GO:0016020;GO:0016020;GO:0016021;GO:0016021;GO:0016021;GO:0016055;GO:0016055;GO:0017147;GO:…	K02235	frizzled class receptor 2 [Source:MGISymbol;Acc:MGI:1888513]
MGP_C57BL6NJ_G0029384	78.2381	141.774	14.7025	0.103704	-3.26946	0.0281833	0.470427	4	143590386	143592644	+	1791	Id3	GO:0000122;GO:0000122;GO:0001085;GO:0001656;GO:0001656;GO:0003700;GO:0003700;GO:0003700;GO:0005515;GO:0005515;GO:0005515;GO:0005634;GO:0005634;GO:0005634;GO:0005634;GO:0005634;GO:0005737;GO:0005737;GO:0005737;GO:0005737;GO:0006275;GO:0006351;GO:0006351;GO:0006355;GO:0007275;GO:0007417;GO:0007417;GO:0007507;GO:0007507;GO:0007517;GO:0007623;GO:0007623;GO:0007623;GO:0008134;GO:0008134;GO:0008134;GO:…	K17694	inhibitor of DNA binding 3 [Source:MGISymbol;Acc:MGI:96398]
MGP_C57BL6NJ_G0016281	47.0465	17.8447	76.2483	4.27288	2.09521	0.028236	0.470595	1	23091223	23448780	-	6880	Col19a1	GO:0007519;GO:0030198;	-	collagen, type XIX, alpha 1 [Source:MGISymbol;Acc:MGI:1095415]
MGP_C57BL6NJ_G0031874	62.4414	115.353	9.52935	0.0826101	-3.59754	0.0282557	0.470595	6	145213098	145216486	-	1187	Mgp	GO:0001503;GO:0005201;GO:0005509;GO:0005509;GO:0005576;GO:0005576;GO:0005615;GO:0005783;GO:0007275;GO:0030154;GO:0030324;GO:0030500;GO:0031012;GO:0031012;GO:0031012;GO:0032991;GO:0048306;GO:0048754;GO:0051216;GO:0062023;GO:0062023;GO:0065003;GO:0070062;	K19481	matrix Gla protein [Source:MGISymbol;Acc:MGI:96976]
MGP_C57BL6NJ_G0030864	3314.92	6040	589.836	0.0976549	-3.35616	0.0283667	0.4715	6	1292781	1333259	+	12427	Col1a2	GO:0001501;GO:0001568;GO:0002020;GO:0005201;GO:0005201;GO:0005515;GO:0005576;GO:0005576;GO:0005578;GO:0005581;GO:0005581;GO:0005584;GO:0005584;GO:0005615;GO:0005615;GO:0005615;GO:0005783;GO:0007179;GO:0007266;GO:0008217;GO:0030020;GO:0030198;GO:0030199;GO:0030674;GO:0031012;GO:0031012;GO:0031012;GO:0042802;GO:0043589;GO:0046332;GO:0046872;GO:0048407;GO:0062023;GO:0070062;GO:0070208;GO:0071230;GO:…	-	collagen, type I, alpha 2 [Source:MGISymbol;Acc:MGI:88468]
MGP_C57BL6NJ_G0016692	1953.21	3593.92	312.503	0.0869533	-3.52361	0.0284213	0.4715	1	95833719	95920221	-	11963	Col6a3	GO:0003429;GO:0004867;GO:0005576;GO:0005578;GO:0005581;GO:0005615;GO:0005615;GO:0010951;GO:0030020;GO:0031012;GO:0031012;GO:0042383;GO:0062023;GO:0070062;GO:1903561;GO:0005578;GO:0005581;GO:0005615;GO:0031012;GO:0042383;	-	collagen, type VI, alpha 3 [Source:MGISymbol;Acc:MGI:88461]
MGP_C57BL6NJ_G0026858	717.062	1340.18	93.9427	0.0700971	-3.8345	0.0284323	0.4715	2	133362407	133421541	+	3248	Fgf7	GO:0005576;GO:0005794;GO:0008284;GO:0031069;GO:0045893;GO:0050679;GO:0060445;GO:0060665;	K04358	fibroblast growth factor 7 [Source:MGISymbol;Acc:MGI:95521]
MGP_C57BL6NJ_G0025777	3084.79	1630.21	4539.36	2.78452	1.47743	0.0284348	0.4715	2	12060782	12152451	+	6371	Mrc1	GO:0004872;GO:0004872;GO:0004888;GO:0004888;GO:0004888;GO:0005537;GO:0005537;GO:0005768;GO:0005886;GO:0005886;GO:0005886;GO:0005887;GO:0006897;GO:0006898;GO:0006898;GO:0007165;GO:0009986;GO:0009986;GO:0010008;GO:0010008;GO:0016020;GO:0016021;GO:0030246;GO:0038024;GO:0038024;GO:0071222;GO:0071222;GO:0071346;GO:0071346;GO:0071353;GO:0071353;	K06560	mannose receptor, C type 1 [Source:MGISymbol;Acc:MGI:97142]
MGP_C57BL6NJ_G0019874	13712	7031.23	20392.8	2.90031	1.53621	0.0284787	0.47171	11	127549596	127657623	+	17065	Rnf213	GO:0001525;GO:0001525;GO:0002040;GO:0002040;GO:0002040;GO:0004842;GO:0004842;GO:0004842;GO:0004842;GO:0005730;GO:0005730;GO:0005737;GO:0005737;GO:0005737;GO:0005829;GO:0005829;GO:0005829;GO:0006511;GO:0006511;GO:0006511;GO:0016020;GO:0016567;GO:0016567;GO:0016567;GO:0016740;GO:0016787;GO:0016887;GO:0016887;GO:0016887;GO:0046872;GO:0051260;GO:0051260;GO:0051865;GO:0051865;GO:2000051;GO:2000051;GO:…	K22754	ring finger protein 213 [Source:MGISymbol;Acc:MGI:1289196]
MGP_C57BL6NJ_G0018438	1696.83	887.484	2506.17	2.8239	1.49769	0.0285111	0.471729	11	9275692	9373430	+	5777	Ikzf1	GO:0000122;GO:0000977;GO:0001227;GO:0003676;GO:0046872;	-	IKAROS family zinc finger 1 [Source:MGISymbol;Acc:MGI:1342540]
MGP_C57BL6NJ_G0031998	8.72734	17.4547	0	0	-Inf	0.0285729	0.471812	7	1672587	1705707	+	4053	Brsk1	GO:0000086;GO:0000166;GO:0000287;GO:0000287;GO:0004672;GO:0004674;GO:0004674;GO:0004674;GO:0005515;GO:0005524;GO:0005524;GO:0005634;GO:0005634;GO:0005634;GO:0005654;GO:0005737;GO:0005737;GO:0005737;GO:0005813;GO:0005813;GO:0005815;GO:0005856;GO:0006468;GO:0006468;GO:0006468;GO:0006468;GO:0006974;GO:0006974;GO:0007049;GO:0007095;GO:0007095;GO:0007269;GO:0007269;GO:0007399;GO:0007409;GO:0007409;GO:…	-	BR serine/threonine kinase 1 [Source:MGISymbol;Acc:MGI:2685946]
MGP_C57BL6NJ_G0031084	14.8031	27.8689	1.73731	0.0623386	-4.00373	0.0286007	0.471812	6	41849240	41858564	-	4101	Fam131b	GO:0003674;GO:0005654;GO:0005829;	-	family with sequence similarity 131, member B[Source:MGI Symbol;Acc:MGI:1923406]
MGP_C57BL6NJ_G0026661	26.4801	50.3542	2.60597	0.0517527	-4.27222	0.0286292	0.471812	2	115669430	115721724	+	6199	Bdnf	GO:0001657;GO:0001662;GO:0005102;GO:0005169;GO:0005169;GO:0005515;GO:0005576;GO:0005576;GO:0005615;GO:0005615;GO:0005615;GO:0005737;GO:0005739;GO:0005788;GO:0006120;GO:0007169;GO:0007214;GO:0007399;GO:0007406;GO:0007411;GO:0007412;GO:0007416;GO:0007422;GO:0007611;GO:0007612;GO:0007613;GO:0007623;GO:0007631;GO:0008021;GO:0008021;GO:0008038;GO:0008083;GO:0008083;GO:0010469;GO:0010832;GO:0014047;GO:…	K04355	brain derived neurotrophic factor [Source:MGISymbol;Acc:MGI:88145]
MGP_C57BL6NJ_G0016530	1130.31	1679.66	580.948	0.345871	-1.53169	0.028641	0.471812	1	77387823	77609734	-	15940	Tns1	GO:0003723;GO:0003779;GO:0005622;GO:0005925;GO:0005925;GO:0007044;GO:0007044;GO:0010761;GO:0010761;GO:0030055;GO:0030055;GO:0035556;	K18080	tensin 1 [Source:MGI Symbol;Acc:MGI:104552]"
MGP_C57BL6NJ_G0017783	951.068	1749.7	152.44	0.0871238	-3.52079	0.0287065	0.472376	10	79555945	79585431	-	8326	Col6a2	GO:0003429;GO:0005576;GO:0005576;GO:0005578;GO:0005578;GO:0005578;GO:0005581;GO:0005615;GO:0005615;GO:0005615;GO:0005615;GO:0007155;GO:0016020;GO:0030020;GO:0031012;GO:0031012;GO:0031012;GO:0031012;GO:0032991;GO:0042383;GO:0042383;GO:0043234;GO:0062023;GO:0070062;GO:0070208;GO:1903561;	K06238	collagen, type VI, alpha 2 [Source:MGISymbol;Acc:MGI:88460]
MGP_C57BL6NJ_G0021409	92.9203	169.792	16.0488	0.0945203	-3.40323	0.0287913	0.473256	14	12944470	13008040	+	4884	Nid2	GO:0005201;GO:0005509;GO:0005515;GO:0005576;GO:0005576;GO:0005578;GO:0005578;GO:0005578;GO:0005604;GO:0005604;GO:0005604;GO:0005615;GO:0005615;GO:0005886;GO:0007155;GO:0007160;GO:0007160;GO:0007160;GO:0009986;GO:0031012;GO:0031012;GO:0031012;GO:0062023;GO:0070062;	K06826	nidogen 2 [Source:MGI Symbol;Acc:MGI:1298229]"
MGP_C57BL6NJ_G0032535	6.3096	12.6192	0	0	-Inf	0.0289331	0.474134	7	35068656	35101371	-	2383	Wtip	GO:0000932;GO:0000932;GO:0000932;GO:0001666;GO:0001666;GO:0003714;GO:0003714;GO:0003714;GO:0005515;GO:0005634;GO:0005634;GO:0005667;GO:0005737;GO:0005829;GO:0005886;GO:0005911;GO:0005912;GO:0005912;GO:0005925;GO:0006351;GO:0006355;GO:0006355;GO:0007010;GO:0007010;GO:0007010;GO:0016020;GO:0022604;GO:0022604;GO:0030030;GO:0030054;GO:0031047;GO:0035195;GO:0035329;GO:0035331;GO:0035331;GO:0035331;GO:…	K16682	WT1-interacting protein [Source:MGISymbol;Acc:MGI:2141920]
MGP_C57BL6NJ_G0030248	97.2785	42.9287	151.628	3.5321	1.82052	0.0289337	0.474134	5	110905693	110967803	-	4275	Zfp951	GO:0003674;GO:0003676;GO:0005575;GO:0005622;GO:0006355;GO:0008150;GO:0046872;	K09228	zinc finger protein 951 [Source:MGISymbol;Acc:MGI:2441896]
MGP_C57BL6NJ_G0016383	986.632	1855.29	117.97	0.0635856	-3.97516	0.0289389	0.474134	1	46187689	46232092	+	9816	Col3a1	GO:0001568;GO:0005578;GO:0005581;GO:0005586;GO:0005615;GO:0021987;GO:0030199;GO:0031012;GO:0031012;GO:0035025;GO:0046332;GO:0048565;GO:0060414;GO:0071230;GO:2001223;	K19720	collagen, type III, alpha 1 [Source:MGISymbol;Acc:MGI:88453]
MGP_C57BL6NJ_G0020751	408.018	207.862	608.173	2.92585	1.54885	0.0289964	0.474561	13	21988531	21989172	+	642	Hist1h1a	GO:0000786;GO:0000790;GO:0003677;GO:0003677;GO:0003677;GO:0003677;GO:0003690;GO:0005515;GO:0005515;GO:0005515;GO:0005634;GO:0005634;GO:0005634;GO:0005634;GO:0005634;GO:0005694;GO:0005719;GO:0006334;GO:0006355;GO:0007283;GO:0007283;GO:0007283;GO:0008201;GO:0008201;GO:0009986;GO:0009986;GO:0016584;GO:0030261;GO:0031492;GO:0031936;GO:0031982;GO:0031982;GO:0045910;GO:0048260;GO:0048260;GO:0048260;	K11275	histone cluster 1, H1a [Source:MGISymbol;Acc:MGI:1931523]
MGP_C57BL6NJ_G0027818	44.4553	82.0075	6.90302	0.0841755	-3.57046	0.0290495	0.474916	3	91999740	92009865	+	5752	Mex3a	GO:0003676;GO:0003723;GO:0003723;GO:0005829;GO:0008150;	K15686	mex3 RNA binding family member A [Source:MGISymbol;Acc:MGI:1919890]
MGP_C57BL6NJ_G0028340	45.8693	88.6983	3.0403	0.0342768	-4.86662	0.0291076	0.475299	3	146124088	146141459	+	3787	Adh7	GO:0001523;GO:0004022;GO:0004022;GO:0004022;GO:0004024;GO:0004031;GO:0004745;GO:0004745;GO:0005576;GO:0005622;GO:0005622;GO:0005737;GO:0005829;GO:0005886;GO:0006067;GO:0006068;GO:0006068;GO:0006069;GO:0008270;GO:0008270;GO:0009617;GO:0010430;GO:0016491;GO:0016491;GO:0016491;GO:0019841;GO:0035276;GO:0042572;GO:0042572;GO:0042573;GO:0042573;GO:0042803;GO:0045471;GO:0046872;GO:0048019;GO:0051287;GO:…	K13951	alcohol dehydrogenase 7 (class IV), mu or sigmapolypeptide [Source:MGI Symbol;Acc:MGI:87926]
MGP_C57BL6NJ_G0016857	5020.87	2656.72	7385.02	2.77975	1.47496	0.0291608	0.475299	1	139720314	139980912	-	12560	Srgap2	GO:0003363;GO:0005096;GO:0005096;GO:0005096;GO:0005634;GO:0005654;GO:0005737;GO:0005737;GO:0005743;GO:0005743;GO:0005829;GO:0005829;GO:0005829;GO:0005886;GO:0005886;GO:0005886;GO:0007165;GO:0007399;GO:0014069;GO:0014069;GO:0016020;GO:0021816;GO:0021816;GO:0030027;GO:0030027;GO:0030054;GO:0030336;GO:0031410;GO:0034446;GO:0042802;GO:0042803;GO:0042803;GO:0042803;GO:0042995;GO:0043197;GO:0043547;GO:…	K07526	SLIT-ROBO Rho GTPase activating protein 2[Source:MGI Symbol;Acc:MGI:109605]
MGP_C57BL6NJ_G0036211	89.8669	167.578	12.1554	0.0725353	-3.78517	0.0291674	0.475299	X	47670342	47971468	-	7807	Hs6st2	GO:0005654;GO:0008146;GO:0015015;GO:0015015;GO:0015015;GO:0016020;GO:0016021;GO:0016021;GO:0016740;GO:0017095;GO:0017095;GO:0017095;GO:0070062;	K08102	heparan sulfate 6-O-sulfotransferase 2 [Source:MGISymbol;Acc:MGI:1354959]
MGP_C57BL6NJ_G0034866	10.1323	20.2645	0	0	-Inf	0.0292086	0.475459	9	15924790	16012797	-	4749	Naalad2	GO:0003824;GO:0004180;GO:0004180;GO:0004180;GO:0005886;GO:0006508;GO:0006508;GO:0006508;GO:0008152;GO:0008233;GO:0008233;GO:0008233;GO:0008237;GO:0016020;GO:0016021;GO:0016021;GO:0016021;GO:0016787;GO:0016805;GO:0042135;GO:0042135;GO:0046872;GO:0050129;GO:0050129;	K01301	N-acetylated alpha-linked acidic dipeptidase 2[Source:MGI Symbol;Acc:MGI:1919810]
MGP_C57BL6NJ_G0028376	256.68	476.667	36.6923	0.0769767	-3.69944	0.0292865	0.476213	3	154284286	154416095	+	3773	Ddah1	GO:0000052;GO:0000052;GO:0000052;GO:0000052;GO:0003073;GO:0003073;GO:0005739;GO:0005739;GO:0006525;GO:0006525;GO:0006527;GO:0006527;GO:0006809;GO:0008270;GO:0008285;GO:0016403;GO:0016403;GO:0016403;GO:0016403;GO:0016403;GO:0016403;GO:0016597;GO:0016597;GO:0016787;GO:0017014;GO:0043116;GO:0045429;GO:0045429;GO:0045429;GO:0045429;GO:0045429;GO:0045766;GO:0046872;GO:0070062;GO:1900038;	K01482	dimethylarginine dimethylaminohydrolase 1[Source:MGI Symbol;Acc:MGI:1916469]
MGP_C57BL6NJ_G0021368	2616.43	4357.29	875.566	0.200943	-2.31514	0.0295385	0.47952	14	140847	285248	+	9337	Flnb	GO:0001725;GO:0001725;GO:0003334;GO:0003334;GO:0003382;GO:0003382;GO:0003723;GO:0003779;GO:0003779;GO:0005515;GO:0005634;GO:0005737;GO:0005737;GO:0005829;GO:0005856;GO:0005886;GO:0005903;GO:0005903;GO:0005925;GO:0005925;GO:0005938;GO:0007519;GO:0007519;GO:0030018;GO:0030036;GO:0030036;GO:0030036;GO:0030154;GO:0031012;GO:0042802;GO:0043005;GO:0043025;GO:0045296;GO:0045335;GO:0045335;GO:0070062;GO:…	K04437	filamin, beta [Source:MGI Symbol;Acc:MGI:2446089]"
MGP_C57BL6NJ_G0026983	406.014	608.322	203.707	0.334867	-1.57834	0.0295733	0.47952	2	145099632	145140130	-	5827	Jag1	GO:0001953;GO:0001974;GO:0001974;GO:0002011;GO:0002011;GO:0002456;GO:0003184;GO:0003184;GO:0003215;GO:0003215;GO:0005112;GO:0005112;GO:0005112;GO:0005112;GO:0005509;GO:0005509;GO:0005515;GO:0005515;GO:0005543;GO:0005886;GO:0005886;GO:0005886;GO:0005912;GO:0005912;GO:0007154;GO:0007219;GO:0007219;GO:0007219;GO:0007219;GO:0007275;GO:0007275;GO:0009887;GO:0009887;GO:0010469;GO:0010628;GO:0016020;GO:…	K06052	jagged 1 [Source:MGI Symbol;Acc:MGI:1095416]"
MGP_C57BL6NJ_G0029969	257.003	472.867	41.1396	0.0870003	-3.52284	0.0296175	0.47952	5	48897773	49233851	+	25370	Slit2	GO:0001656;GO:0001657;GO:0001701;GO:0001933;GO:0002042;GO:0002689;GO:0003180;GO:0003184;GO:0005095;GO:0005102;GO:0005201;GO:0005509;GO:0005515;GO:0005576;GO:0005615;GO:0005615;GO:0005737;GO:0005886;GO:0005886;GO:0006935;GO:0007275;GO:0007399;GO:0007409;GO:0007411;GO:0008045;GO:0008201;GO:0008201;GO:0008285;GO:0010593;GO:0010596;GO:0010629;GO:0014912;GO:0021772;GO:0021836;GO:0021952;GO:0021972;GO:…	K06839	slit homolog 2 (Drosophila) [Source:MGISymbol;Acc:MGI:1315205]
MGP_C57BL6NJ_G0019334	45.6124	74.7798	16.445	0.219912	-2.185	0.0296392	0.47952	11	95393384	95437556	-	5517	Tom1l1	GO:0005515;GO:0005622;GO:0005622;GO:0005737;GO:0005737;GO:0005768;GO:0005768;GO:0005794;GO:0005795;GO:0005829;GO:0006810;GO:0006886;GO:0006886;GO:0007165;GO:0007169;GO:0010008;GO:0015031;GO:0016020;GO:0017124;GO:0019901;GO:0030276;GO:0030295;GO:0030295;GO:0031954;GO:0032147;GO:0032147;GO:0045839;GO:0070062;	-	target of myb1-like 1 (chicken) [Source:MGISymbol;Acc:MGI:1919193]
MGP_C57BL6NJ_G0027774	30.3361	56.3935	4.27864	0.0758711	-3.72031	0.0297011	0.47952	3	89801451	89805449	-	3045	Mab21l2	GO:0001654;GO:0001654;GO:0005634;GO:0005634;GO:0005634;GO:0005737;GO:0005737;GO:0007275;GO:0008284;GO:0008284;GO:0010172;GO:0010172;GO:0043010;GO:0043010;	-	mab-21-like 2 (C. elegans) [Source:MGISymbol;Acc:MGI:1346022]
MGP_C57BL6NJ_G0021608	340.952	175.101	506.802	2.89434	1.53324	0.0297079	0.47952	14	42875669	42907031	-	6650	Dlgap5	GO:0006470;GO:0023052;	K16804	discs, large (Drosophila) homolog-associatedprotein 5 [Source:MGI Symbol;Acc:MGI:2183453]
MGP_C57BL6NJ_G0026015	20.0412	35.3268	4.75562	0.134618	-2.89306	0.0297326	0.47952	2	31459259	31475855	+	2078	Plpp7	GO:0005634;GO:0005635;GO:0005635;GO:0005635;GO:0005783;GO:0005789;GO:0010832;GO:0010832;GO:0016020;GO:0016021;GO:0016311;	-	phospholipid phosphatase 7 (inactive) [Source:MGISymbol;Acc:MGI:2445183]
MGP_C57BL6NJ_G0019233	50.3907	19.2418	81.5397	4.23764	2.08326	0.0297438	0.47952	11	87079469	87095684	+	3891	Slfn4	GO:0003674;GO:0005524;GO:0005575;GO:0008150;GO:0009617;GO:0009617;	-	schlafen 4 [Source:MGI Symbol;Acc:MGI:1329010]"
MGP_C57BL6NJ_G0030426	354.384	532.659	176.109	0.330623	-1.59674	0.0298872	0.480428	5	126007311	126029231	+	5661	2410131K14Rik	GO:0003674;GO:0005575;GO:0005576;GO:0008150;	-	RIKEN cDNA 2410131K14 gene [Source:MGISymbol;Acc:MGI:1924042]
MGP_C57BL6NJ_G0023988	12.6411	1.99311	23.2892	11.6848	3.54657	0.0299088	0.480428	17	36007786	36010408	-	1761	Egfl8	-	-	EGF-like domain 8 [Source:MGISymbol;Acc:MGI:1932094]
MGP_C57BL6NJ_G0034624	488.252	752.22	224.283	0.298162	-1.74583	0.0299341	0.480428	8	117611085	117668833	+	5041	St3gal2	GO:0000139;GO:0003836;GO:0003836;GO:0003836;GO:0003836;GO:0005576;GO:0005794;GO:0006486;GO:0006486;GO:0006486;GO:0006486;GO:0008373;GO:0008373;GO:0009101;GO:0009247;GO:0009311;GO:0009312;GO:0016020;GO:0016021;GO:0016740;GO:0016757;GO:0018279;GO:0030259;GO:0032580;GO:0047288;GO:0097503;GO:0097503;GO:1990743;	K03368	ST3 beta-galactoside alpha-2,3-sialyltransferase 2[Source:MGI Symbol;Acc:MGI:99427]
MGP_C57BL6NJ_G0026140	151.656	75.4944	227.817	3.01767	1.59344	0.0299403	0.480428	2	50280236	50444977	+	7142	Kif5c	GO:0000166;GO:0003777;GO:0003777;GO:0003777;GO:0005515;GO:0005515;GO:0005515;GO:0005524;GO:0005524;GO:0005737;GO:0005737;GO:0005737;GO:0005856;GO:0005871;GO:0005871;GO:0005874;GO:0005874;GO:0006810;GO:0007018;GO:0007018;GO:0007411;GO:0008017;GO:0008017;GO:0008017;GO:0008045;GO:0008045;GO:0008104;GO:0008574;GO:0016887;GO:0016887;GO:0030425;GO:0030425;GO:0030705;GO:0032839;GO:0034190;GO:0035253;GO:…	K10396	kinesin family member 5C [Source:MGISymbol;Acc:MGI:1098269]
MGP_C57BL6NJ_G0023574	1020.32	1873.6	167.042	0.0891552	-3.48754	0.0299592	0.480428	17	13081376	13109954	-	5922	Thbs2	GO:0005509;GO:0005515;GO:0005515;GO:0005515;GO:0005576;GO:0005576;GO:0005578;GO:0005578;GO:0005604;GO:0005604;GO:0005604;GO:0005615;GO:0005615;GO:0007155;GO:0007155;GO:0008201;GO:0008201;GO:0016525;GO:0016525;GO:0016525;GO:0016525;GO:0016525;GO:0030198;GO:0031012;GO:0031012;GO:0031012;GO:0031091;GO:0031091;GO:0051965;GO:0051965;	K04659	thrombospondin 2 [Source:MGI Symbol;Acc:MGI:98738]"
MGP_C57BL6NJ_G0031919	82.0675	148.626	15.5094	0.104352	-3.26047	0.0299941	0.480479	6	153992843	154092509	-	9322	Bcat1	GO:0003824;GO:0004084;GO:0004084;GO:0004084;GO:0004084;GO:0005737;GO:0005737;GO:0005739;GO:0005739;GO:0005829;GO:0008152;GO:0008483;GO:0008652;GO:0009081;GO:0009082;GO:0009083;GO:0009098;GO:0009099;GO:0016740;GO:0042802;GO:0052654;GO:0052655;GO:0052656;	K00826	branched chain aminotransferase 1, cytosolic[Source:MGI Symbol;Acc:MGI:104861]
MGP_C57BL6NJ_G0035426	8.92948	17.859	0	0	-Inf	0.0300568	0.480518	9	65484098	65509347	+	2604	Lctl	GO:0004553;GO:0005783;GO:0005783;GO:0005783;GO:0005783;GO:0005789;GO:0005903;GO:0005903;GO:0005975;GO:0008422;GO:0016020;GO:0016021;GO:1901657;	-	lactase-like [Source:MGI Symbol;Acc:MGI:2183549]"
MGP_C57BL6NJ_G0023765	198.053	298.736	97.369	0.325937	-1.61734	0.0301303	0.480518	17	25717373	25802792	+	13471	Lmf1	GO:0005515;GO:0005783;GO:0005789;GO:0005789;GO:0005789;GO:0005789;GO:0005794;GO:0006641;GO:0006641;GO:0006888;GO:0006888;GO:0009306;GO:0009306;GO:0016020;GO:0016021;GO:0033578;GO:0033578;GO:0034382;GO:0034382;GO:0051006;GO:0051006;GO:0051604;GO:0051604;GO:0051604;GO:0090181;GO:0090181;GO:0090207;GO:0090207;	-	lipase maturation factor 1 [Source:MGISymbol;Acc:MGI:1923733]
MGP_C57BL6NJ_G0020008	1114.94	1646.89	582.987	0.353992	-1.49821	0.030149	0.480518	12	15174344	15192539	+	3745	Pdia6	-	K09584	protein disulfide isomerase associated 6[Source:MGI Symbol;Acc:MGI:1919103]
MGP_C57BL6NJ_G0018738	664.066	333.03	995.102	2.98803	1.57919	0.0301548	0.480518	11	59667295	59689101	+	3557	Irgm2	GO:0000045;GO:0000139;GO:0001934;GO:0003924;GO:0003924;GO:0005525;GO:0005739;GO:0005789;GO:0005794;GO:0005794;GO:0005829;GO:0006952;GO:0009617;GO:0010508;GO:0010800;GO:0016020;GO:0019901;GO:0020003;GO:0031648;GO:0033138;GO:0034341;GO:0035458;GO:0042742;GO:0042742;GO:0042832;GO:0043254;GO:0043539;GO:0045087;GO:0050700;GO:0050821;GO:0050829;GO:0051434;GO:0060335;GO:0061635;GO:0061739;GO:0061762;GO:…	-	immunity-related GTPase family M member 2[Source:MGI Symbol;Acc:MGI:1926262]
MGP_C57BL6NJ_G0029975	265.007	490.185	39.8295	0.0812541	-3.62142	0.0301556	0.480518	5	53472655	53480341	+	3738	Sod3	GO:0001666;GO:0001666;GO:0004784;GO:0004784;GO:0004784;GO:0004784;GO:0004784;GO:0005507;GO:0005515;GO:0005576;GO:0005576;GO:0005615;GO:0005615;GO:0005615;GO:0005615;GO:0005615;GO:0005634;GO:0005737;GO:0005737;GO:0005796;GO:0006801;GO:0008270;GO:0016209;GO:0016491;GO:0016532;GO:0019430;GO:0019430;GO:0031012;GO:0031012;GO:0031012;GO:0046688;GO:0046872;GO:0046872;GO:0055114;GO:0055114;GO:0062023;GO:…	K16627	superoxide dismutase 3, extracellular [Source:MGISymbol;Acc:MGI:103181]
MGP_C57BL6NJ_G0021668	61.8749	25.8422	97.9077	3.78868	1.9217	0.0302371	0.481309	14	46948162	46950216	+	1072	Rnase6	GO:0003676;GO:0004518;GO:0004519;GO:0016787;GO:0090305;	K01172	ribonuclease, RNase A family, 6 [Source:MGISymbol;Acc:MGI:1925666]
MGP_C57BL6NJ_G0030155	10.5169	20.6075	0.426248	0.0206841	-5.59533	0.0302906	0.481653	5	95347655	95387478	-	4260	Rassf6	GO:0005515;GO:0005575;GO:0006915;GO:0007165;GO:0042981;GO:0042981;GO:0043065;	K09854	Ras association (RalGDS/AF-6) domain family member6 [Source:MGI Symbol;Acc:MGI:1920496]
MGP_C57BL6NJ_G0028336	6.74564	13.4913	0	0	-Inf	0.0303465	0.48173	3	145968034	145984488	+	9998	1110002E22Rik	GO:0003674;GO:0005575;GO:0008150;	-	RIKEN cDNA 1110002E22 gene [Source:MGISymbol;Acc:MGI:1915066]
MGP_C57BL6NJ_G0028817	126.182	231.646	20.7188	0.0894416	-3.48291	0.0303593	0.48173	4	84019951	84183249	-	12434	Mpdz	GO:0005515;GO:0005515;GO:0005515;GO:0005737;GO:0005886;GO:0005923;GO:0005923;GO:0005923;GO:0007155;GO:0007155;GO:0008022;GO:0014069;GO:0016020;GO:0016324;GO:0016324;GO:0016324;GO:0016327;GO:0030054;GO:0030425;GO:0031410;GO:0031410;GO:0042552;GO:0042995;GO:0043005;GO:0043220;GO:0043220;GO:0045202;GO:0045211;	K06095	multiple PDZ domain protein [Source:MGISymbol;Acc:MGI:1343489]
MGP_C57BL6NJ_G0025934	1618.19	3003.84	232.541	0.0774145	-3.69125	0.0304663	0.482921	2	26784873	26949071	+	8489	Col5a1	GO:0001568;GO:0001568;GO:0003007;GO:0003007;GO:0005201;GO:0005201;GO:0005201;GO:0005201;GO:0005515;GO:0005576;GO:0005576;GO:0005578;GO:0005578;GO:0005578;GO:0005581;GO:0005581;GO:0005581;GO:0005588;GO:0005588;GO:0005604;GO:0005604;GO:0005615;GO:0005615;GO:0005615;GO:0007155;GO:0007155;GO:0008201;GO:0008201;GO:0008201;GO:0016477;GO:0030020;GO:0030198;GO:0030199;GO:0030199;GO:0030199;GO:0031012;GO:…	K19721	collagen, type V, alpha 1 [Source:MGISymbol;Acc:MGI:88457]
MGP_C57BL6NJ_G0029811	200.379	101.055	299.702	2.96572	1.56838	0.030533	0.483471	5	29747075	29773510	-	3282	-	-	K00560	-
MGP_C57BL6NJ_G0023315	293.67	541.15	46.1912	0.0853576	-3.55034	0.030615	0.483866	16	58355268	58497694	-	5108	Col8a1	GO:0001525;GO:0005201;GO:0005576;GO:0005578;GO:0005581;GO:0005604;GO:0005615;GO:0005615;GO:0005615;GO:0007155;GO:0010811;GO:0010811;GO:0030020;GO:0030198;GO:0031012;GO:0031012;GO:0048593;GO:0048593;GO:0050673;GO:0050673;GO:0062023;GO:0070062;	-	collagen, type VIII, alpha 1 [Source:MGISymbol;Acc:MGI:88463]
MGP_C57BL6NJ_G0017730	138.165	253.508	22.8216	0.0900232	-3.47356	0.0306515	0.483866	10	71911312	72461924	+	33158	-	-	K10380	-
MGP_C57BL6NJ_G0036074	17.5754	3.64563	31.5052	8.64189	3.11135	0.030654	0.483866	X	8708517	8717199	+	2090	Gpr34	GO:0004871;GO:0004930;GO:0004930;GO:0005886;GO:0005887;GO:0007165;GO:0007186;GO:0007186;GO:0007186;GO:0016020;GO:0016021;GO:0016021;GO:0035589;GO:0045028;	K08383	G protein-coupled receptor 34 [Source:MGISymbol;Acc:MGI:1346334]
[truncated: 14,149 more rows]
