# Supplementary material for: LncRNA-mRNA Expression Profiles of Osteoclast After Conditional Knockout HIF-1α
Source: Front Genet. 2022 Jun 21;13:909095. doi: 10.3389/fgene.2022.909095 (PMC9253292; doi:10.3389/fgene.2022.909095)
Supplement: Supplementary file 2 [file Table3.XLSX]

## Sheet: Sheet1
Sample	Cko_2	Cko_1	Cko_3	Ctrl_3	Ctrl_1	Ctrl_2
MGP_C57BL6NJ_G0035980	1.9862	0.00759572	-0.284279	-0.569838	-0.569838	-0.569838
MGP_C57BL6NJ_G0017081	1.89582	0.304576	-0.278677	-0.667777	-0.586164	-0.667777
MGP_C57BL6NJ_G0028410	1.94188	0.221958	-0.457541	-0.568766	-0.568766	-0.568766
MGP_C57BL6NJ_G0029946	1.69031	0.769709	-0.670904	-0.670904	-0.447301	-0.670904
MGP_C57BL6NJ_G0016624	1.5291	1.01909	-0.637047	-0.637047	-0.637047	-0.637047
MGP_C57BL6NJ_G0027419	1.53578	1.01031	-0.636523	-0.636523	-0.636523	-0.636523
MGP_C57BL6NJ_G0019478	1.84227	0.492827	-0.583774	-0.583774	-0.583774	-0.583774
MGP_C57BL6NJ_G0025301	1.70461	0.676864	-0.228704	-0.798252	-0.556269	-0.798252
MGP_C57BL6NJ_G0028356	1.54882	0.812672	-0.157409	-0.396418	-0.653863	-1.1538
MGP_C57BL6NJ_G0035222	1.457	1.00621	-0.105025	-0.78606	-0.78606	-0.78606
MGP_C57BL6NJ_G0032426	1.39375	1.15068	-0.342605	-0.733942	-0.733942	-0.733942
MGP_C57BL6NJ_G0018977	1.51047	1.00885	-0.395515	-0.543147	-0.790331	-0.790331
MGP_C57BL6NJ_G0031796	1.55839	0.949164	-0.355022	-0.717511	-0.717511	-0.717511
MGP_C57BL6NJ_G0030250	1.34378	0.771795	0.421251	-1.16166	-0.436435	-0.938725
MGP_C57BL6NJ_G0016396	1.35452	0.885308	0.279385	-0.958633	-0.49152	-1.06906
MGP_C57BL6NJ_G0028051	1.3593	0.863378	0.335558	-0.989841	-0.57855	-0.989841
MGP_C57BL6NJ_G0025474	1.37109	0.932463	0.214627	-1.07069	-0.651109	-0.796387
MGP_C57BL6NJ_G0026296	1.26986	0.984946	0.282547	-1.18211	-0.573247	-0.781989
MGP_C57BL6NJ_G0034132	1.37205	0.896711	0.208319	-1.17753	-0.510123	-0.78942
MGP_C57BL6NJ_G0023507	1.32485	0.897461	0.378951	-0.996915	-0.715818	-0.888532
MGP_C57BL6NJ_G0024872	1.35144	0.86886	0.352187	-1.09418	-0.690586	-0.787728
MGP_C57BL6NJ_G0026190	1.31668	0.831271	0.441473	-1.16929	-0.661006	-0.759125
MGP_C57BL6NJ_G0017218	1.0803	1.14113	0.265255	-1.27754	-0.384057	-0.825093
MGP_C57BL6NJ_G0028397	1.08809	1.04957	0.394731	-1.27934	-0.364911	-0.888138
MGP_C57BL6NJ_G0023203	1.17613	1.06919	0.27083	-1.09246	-0.400968	-1.02272
MGP_C57BL6NJ_G0031296	1.10276	1.09053	0.398866	-1.0447	-0.50275	-1.0447
MGP_C57BL6NJ_G0019232	1.11807	0.886146	0.5842	-1.26554	-0.390529	-0.932346
MGP_C57BL6NJ_G0024881	1.1258	0.899194	0.570689	-1.28754	-0.447958	-0.860188
MGP_C57BL6NJ_G0020412	1.12355	0.983235	0.482862	-1.21648	-0.446677	-0.92649
MGP_C57BL6NJ_G0033197	1.09556	0.971264	0.567324	-1.15463	-0.508593	-0.970929
MGP_C57BL6NJ_G0019026	1.05695	1.06461	0.501438	-1.24198	-0.659615	-0.721406
MGP_C57BL6NJ_G0024870	1.14395	0.987833	0.530949	-1.08766	-0.716019	-0.859054
MGP_C57BL6NJ_G0024873	1.11797	1.0335	0.489089	-1.15781	-0.702555	-0.780191
MGP_C57BL6NJ_G0027195	1.41424	0.930084	0.15952	-0.742599	-0.821588	-0.939658
MGP_C57BL6NJ_G0031772	1.29648	1.06127	0.17485	-0.90777	-0.71706	-0.90777
MGP_C57BL6NJ_G0027223	1.25913	1.06734	0.247045	-0.891262	-0.891262	-0.790987
MGP_C57BL6NJ_G0027527	1.32678	1.04568	0.147438	-0.907397	-0.829137	-0.783357
MGP_C57BL6NJ_G0030047	1.51263	0.733049	0.180204	-1.0894	-0.844642	-0.491843
MGP_C57BL6NJ_G0019874	1.49047	0.77869	0.179325	-1.12344	-0.659842	-0.6652
MGP_C57BL6NJ_G0030251	1.512	0.717062	0.27617	-0.968712	-0.815889	-0.720636
MGP_C57BL6NJ_G0018344	1.53623	0.706925	0.229722	-0.914775	-0.643325	-0.914775
MGP_C57BL6NJ_G0035218	1.65056	0.642944	0.067256	-0.786922	-0.786922	-0.786922
MGP_C57BL6NJ_G0022455	1.56866	0.613312	0.181464	-1.11792	-0.393808	-0.851704
MGP_C57BL6NJ_G0025723	1.48531	0.601305	0.307504	-1.31115	-0.414583	-0.668381
MGP_C57BL6NJ_G0026133	1.40554	0.724208	0.303066	-1.32266	-0.409326	-0.700833
MGP_C57BL6NJ_G0017212	1.29009	0.836091	0.423852	-1.28236	-0.700936	-0.566738
MGP_C57BL6NJ_G0019233	1.52105	0.560261	0.309585	-1.25861	-0.726641	-0.405644
MGP_C57BL6NJ_G0031239	1.45473	0.552608	0.379165	-1.39333	-0.502289	-0.490887
MGP_C57BL6NJ_G0032192	1.4446	0.430265	0.466493	-1.20003	-1.02837	-0.112962
MGP_C57BL6NJ_G0036074	1.59753	0.39834	0.217647	-1.05634	-1.05634	-0.100837
MGP_C57BL6NJ_G0018353	1.33203	0.693302	0.562682	-1.05927	-1.02689	-0.501851
MGP_C57BL6NJ_G0028325	1.43294	0.601177	0.4484	-1.06103	-1.06295	-0.358541
MGP_C57BL6NJ_G0019628	1.54484	0.292565	0.591206	-0.852377	-1.1118	-0.464431
MGP_C57BL6NJ_G0023890	1.51276	0.378645	0.634605	-0.922177	-0.922177	-0.681652
MGP_C57BL6NJ_G0022123	1.69734	0.175081	0.315608	-1.03232	-0.220603	-0.935108
MGP_C57BL6NJ_G0025289	1.75253	0.332085	0.108081	-0.915309	-0.362077	-0.915309
MGP_C57BL6NJ_G0028898	1.87999	0.118633	0.0832024	-0.69394	-0.69394	-0.69394
MGP_C57BL6NJ_G0031806	1.82068	-0.0186175	0.327284	-0.814894	-0.499558	-0.814894
MGP_C57BL6NJ_G0019719	1.56623	0.189631	0.559804	-1.28833	-0.584711	-0.442625
MGP_C57BL6NJ_G0017587	1.58031	0.0539107	0.763631	-0.799285	-0.799285	-0.799285
MGP_C57BL6NJ_G0022546	1.55356	0.0245353	0.818914	-0.799004	-0.799004	-0.799004
MGP_C57BL6NJ_G0026140	0.62503	1.00523	0.38297	-1.818	0.155377	-0.350599
MGP_C57BL6NJ_G0028034	0.83649	0.928962	0.492226	-1.73986	-0.128825	-0.388992
MGP_C57BL6NJ_G0034812	0.902083	0.955322	0.337229	-1.74226	-0.121079	-0.331296
MGP_C57BL6NJ_G0024414	0.765666	0.943446	0.309844	-1.83618	0.0489566	-0.23173
MGP_C57BL6NJ_G0030847	0.912872	0.921492	0.231335	-1.79283	-0.057288	-0.215579
MGP_C57BL6NJ_G0018567	0.592095	0.746677	0.589593	-1.89028	0.27284	-0.310923
MGP_C57BL6NJ_G0029019	0.654364	0.786415	0.483336	-1.84271	0.35983	-0.441235
MGP_C57BL6NJ_G0021094	0.713278	0.780976	0.450975	-1.8425	0.321365	-0.424095
MGP_C57BL6NJ_G0033948	0.734888	0.778681	0.495101	-1.82648	0.266573	-0.448765
MGP_C57BL6NJ_G0021255	0.7448	0.653728	0.40147	-1.88136	0.436855	-0.355494
MGP_C57BL6NJ_G0021160	0.683487	0.737751	0.47227	-1.9022	0.275567	-0.266873
MGP_C57BL6NJ_G0028503	0.73771	0.688697	0.392464	-1.91007	0.341328	-0.250126
MGP_C57BL6NJ_G0021180	0.776643	0.613728	0.491919	-1.91288	0.258824	-0.228238
MGP_C57BL6NJ_G0031272	0.7098	0.618346	0.527539	-1.90558	0.343588	-0.293698
MGP_C57BL6NJ_G0029207	0.618543	0.7485	0.684195	-1.88677	0.00609081	-0.170558
MGP_C57BL6NJ_G0031005	0.632775	0.715183	0.64352	-1.91259	0.0407756	-0.119661
MGP_C57BL6NJ_G0017271	0.681505	0.621974	0.715107	-1.88979	0.105508	-0.23431
MGP_C57BL6NJ_G0020394	0.697903	0.627363	0.700978	-1.89404	0.0600704	-0.192271
MGP_C57BL6NJ_G0032114	0.727489	0.702579	0.623127	-1.87248	0.0917572	-0.272468
MGP_C57BL6NJ_G0034087	0.703454	0.697759	0.69233	-1.84883	0.0907788	-0.335493
MGP_C57BL6NJ_G0018549	0.726029	0.742575	0.475765	-1.91092	0.129783	-0.163229
MGP_C57BL6NJ_G0032899	0.656301	0.782299	0.527736	-1.89528	0.169619	-0.240676
MGP_C57BL6NJ_G0019197	0.835454	0.692214	0.568113	-1.83296	0.0986132	-0.361433
MGP_C57BL6NJ_G0031596	0.801522	0.810735	0.509224	-1.81546	0.0686255	-0.374647
MGP_C57BL6NJ_G0016628	1.00785	0.396259	0.465444	-1.84443	0.310208	-0.335331
MGP_C57BL6NJ_G0034104	1.16378	0.383121	0.624428	-1.66493	0.0698401	-0.576247
MGP_C57BL6NJ_G0017611	0.928993	0.58695	0.614665	-1.79819	0.0846968	-0.417113
MGP_C57BL6NJ_G0019278	0.946994	0.663733	0.51584	-1.78757	0.0985544	-0.437552
MGP_C57BL6NJ_G0016857	1.00738	0.680784	0.536681	-1.75432	-0.084668	-0.385859
MGP_C57BL6NJ_G0031191	1.1092	0.56189	0.560728	-1.71224	-0.0690028	-0.450576
MGP_C57BL6NJ_G0019759	0.547766	0.799295	0.902647	-1.70683	0.0332529	-0.576129
MGP_C57BL6NJ_G0018238	0.688499	0.747976	0.85986	-1.69407	-0.00456384	-0.597701
MGP_C57BL6NJ_G0032302	0.677148	0.760871	0.883399	-1.68686	-0.0571638	-0.577392
MGP_C57BL6NJ_G0029811	0.671454	0.594144	0.865686	-1.81172	0.0782882	-0.397857
MGP_C57BL6NJ_G0017213	0.762285	0.774163	0.688086	-1.77661	-0.0124654	-0.435454
MGP_C57BL6NJ_G0035474	0.7259	0.697848	0.70729	-1.80025	0.142988	-0.473773
MGP_C57BL6NJ_G0031324	0.589787	0.844498	0.791057	-1.77936	-0.0686582	-0.377326
MGP_C57BL6NJ_G0027867	0.683466	0.890292	0.661024	-1.78327	-0.122487	-0.329028
MGP_C57BL6NJ_G0028223	0.66698	0.89288	0.700416	-1.7744	-0.223152	-0.262723
MGP_C57BL6NJ_G0018438	0.773551	0.699526	0.855851	-1.71693	-0.156545	-0.455451
MGP_C57BL6NJ_G0030897	0.875585	0.648653	0.79546	-1.71075	-0.120389	-0.488564
MGP_C57BL6NJ_G0016515	0.885713	0.809114	0.703651	-1.65344	-0.2077	-0.537342
MGP_C57BL6NJ_G0031338	0.769874	0.793851	0.825488	-1.6459	-0.136685	-0.60663
MGP_C57BL6NJ_G0021283	0.769388	0.876482	0.724002	-1.64188	-0.0857091	-0.642282
MGP_C57BL6NJ_G0025395	0.804378	0.876812	0.730612	-1.61718	-0.152973	-0.641651
MGP_C57BL6NJ_G0033198	0.906736	0.81289	0.618912	-1.58583	0.0334309	-0.786137
MGP_C57BL6NJ_G0016837	0.880409	0.829612	0.584733	-1.68996	-0.0232413	-0.58155
MGP_C57BL6NJ_G0026827	0.705555	0.849202	0.715396	-1.69624	0.0501879	-0.624098
MGP_C57BL6NJ_G0020399	0.90769	0.793179	0.672858	-1.69144	-0.325302	-0.356985
MGP_C57BL6NJ_G0017598	0.969772	0.677752	0.699033	-1.70447	-0.311458	-0.330625
MGP_C57BL6NJ_G0029361	0.955888	0.604425	0.785759	-1.7006	-0.282861	-0.362613
MGP_C57BL6NJ_G0030095	1.00038	0.60618	0.727143	-1.69933	-0.233188	-0.40118
MGP_C57BL6NJ_G0016949	1.09001	0.645947	0.680672	-1.59457	-0.251687	-0.57037
MGP_C57BL6NJ_G0031603	1.0752	0.651483	0.66996	-1.59306	-0.167322	-0.636266
MGP_C57BL6NJ_G0036351	1.08761	0.690609	0.584817	-1.61092	-0.130851	-0.621263
MGP_C57BL6NJ_G0024302	0.99791	0.489674	0.810566	-1.70543	-0.188578	-0.404145
MGP_C57BL6NJ_G0035626	0.956956	0.577167	0.766166	-1.67972	-0.0363338	-0.584237
MGP_C57BL6NJ_G0031979	0.908227	0.675749	0.693991	-1.74898	-0.126601	-0.402389
MGP_C57BL6NJ_G0036757	0.906346	0.701128	0.706928	-1.72146	-0.141564	-0.451377
MGP_C57BL6NJ_G0019739	0.875202	0.649401	0.740301	-1.74864	-0.0667668	-0.449495
MGP_C57BL6NJ_G0031516	0.8714	0.651382	0.702872	-1.77561	-0.0402592	-0.409785
MGP_C57BL6NJ_G0016973	0.919634	0.62948	0.654114	-1.76699	0.0193198	-0.455556
MGP_C57BL6NJ_G0032874	0.89618	0.625737	0.713282	-1.74973	-0.000715217	-0.484754
MGP_C57BL6NJ_G0018475	0.493465	0.467951	0.838495	-1.93919	0.248909	-0.109628
MGP_C57BL6NJ_G0021292	0.609533	0.485371	0.758608	-1.87529	0.398487	-0.376713
MGP_C57BL6NJ_G0019023	0.508905	0.570353	0.480121	-1.97966	0.508332	-0.0880543
MGP_C57BL6NJ_G0030396	0.308864	0.663068	0.719797	-1.95311	0.352113	-0.0907361
MGP_C57BL6NJ_G0017696	0.475518	0.65664	0.586759	-1.93066	0.458391	-0.246644
MGP_C57BL6NJ_G0026768	0.467362	0.688273	0.633888	-1.93997	0.3314	-0.180957
MGP_C57BL6NJ_G0033831	0.458889	0.613589	0.727864	-1.91743	0.37457	-0.257479
MGP_C57BL6NJ_G0017174	0.798653	0.328632	0.400779	-1.99295	0.31493	0.149959
MGP_C57BL6NJ_G0020903	0.545712	0.48766	0.521261	-2.01799	0.312369	0.150992
MGP_C57BL6NJ_G0026665	0.684321	0.507646	0.545591	-1.95675	0.358013	-0.138817
MGP_C57BL6NJ_G0019473	0.55495	0.562003	0.545146	-1.99256	0.329725	0.000733107
MGP_C57BL6NJ_G0028495	0.58605	0.570346	0.595204	-1.97799	0.252703	-0.0263154
MGP_C57BL6NJ_G0017385	0.629966	0.650756	0.586585	-1.95192	0.147187	-0.0625724
MGP_C57BL6NJ_G0029351	0.551247	0.677169	0.563541	-1.96833	0.210869	-0.0344924
MGP_C57BL6NJ_G0025511	0.658799	0.668103	0.438783	-1.95541	0.301562	-0.111832
MGP_C57BL6NJ_G0028461	0.615388	0.620219	0.531512	-1.96531	0.288875	-0.0906817
MGP_C57BL6NJ_G0031119	0.800043	0.484205	0.465575	-1.966	0.208584	0.00759241
MGP_C57BL6NJ_G0036402	0.841305	0.496733	0.466518	-1.93982	0.234602	-0.0993339
MGP_C57BL6NJ_G0034799	0.745316	0.600044	0.379229	-1.97348	0.211108	0.0377885
MGP_C57BL6NJ_G0028313	0.697029	0.577274	0.440223	-1.97983	0.259535	0.00576747
MGP_C57BL6NJ_G0028204	0.661554	0.560176	0.501333	-1.98027	0.274676	-0.0174716
MGP_C57BL6NJ_G0034656	0.664612	0.548313	0.495996	-1.98737	0.247028	0.0314162
MGP_C57BL6NJ_G0016969	0.704787	0.607965	0.586816	-1.9328	0.179456	-0.146225
MGP_C57BL6NJ_G0022274	0.740916	0.559684	0.495656	-1.95349	0.25698	-0.0997417
MGP_C57BL6NJ_G0023650	0.723698	0.565981	0.554345	-1.95175	0.183266	-0.0755386
MGP_C57BL6NJ_G0026751	0.791794	0.532856	0.531997	-1.94442	0.147574	-0.0598057
MGP_C57BL6NJ_G0024329	0.65319	0.636378	0.598659	-1.9511	0.0561093	0.00676081
MGP_C57BL6NJ_G0031266	0.662014	0.632263	0.613583	-1.94497	0.0493856	-0.0122756
MGP_C57BL6NJ_G0035584	0.721788	0.600695	0.592223	-1.93634	0.105214	-0.0835819
MGP_C57BL6NJ_G0035597	0.727491	0.630053	0.53503	-1.94385	0.087602	-0.0363296
MGP_C57BL6NJ_G0024446	0.808148	0.658932	0.423638	-1.92983	0.083767	-0.0446601
MGP_C57BL6NJ_G0030856	0.785213	0.657936	0.410878	-1.94114	0.113941	-0.0268234
MGP_C57BL6NJ_G0016435	0.798267	0.579885	0.417437	-1.95869	0.116725	0.046379
MGP_C57BL6NJ_G0025482	0.749822	0.583922	0.499122	-1.95909	0.0921973	0.0340246
MGP_C57BL6NJ_G0020751	0.276202	0.784754	0.761752	-1.92586	-0.0300871	0.133243
MGP_C57BL6NJ_G0024967	0.265433	0.97742	0.597	-1.8847	0.202287	-0.157445
MGP_C57BL6NJ_G0035429	0.432196	0.840795	0.512771	-1.94631	0.225774	-0.0652294
MGP_C57BL6NJ_G0031397	0.854348	0.757233	0.578787	-1.79425	-0.376834	-0.019289
MGP_C57BL6NJ_G0017345	0.860572	0.87509	0.541536	-1.74472	-0.35158	-0.180902
MGP_C57BL6NJ_G0019597	0.851125	0.765262	0.690364	-1.74631	-0.338167	-0.222274
MGP_C57BL6NJ_G0035559	0.79217	0.810484	0.711641	-1.73868	-0.388992	-0.186624
MGP_C57BL6NJ_G0035906	0.644254	0.896333	0.564558	-1.83798	-0.290016	0.0228508
MGP_C57BL6NJ_G0017146	0.642772	0.744104	0.809087	-1.80272	-0.35696	-0.0362845
MGP_C57BL6NJ_G0031150	0.634317	0.787107	0.839237	-1.77586	-0.27836	-0.206441
MGP_C57BL6NJ_G0021107	0.708984	0.720587	0.510185	-1.92429	-0.0936942	0.0782324
MGP_C57BL6NJ_G0023450	0.764138	0.575077	0.517841	-1.94813	-0.0489929	0.140065
MGP_C57BL6NJ_G0032780	0.77095	0.61709	0.759106	-1.82462	-0.344754	0.0222297
MGP_C57BL6NJ_G0016387	0.862194	0.577617	0.697122	-1.83771	-0.236423	-0.0628053
MGP_C57BL6NJ_G0019943	0.874877	0.510935	0.675951	-1.86557	-0.190379	-0.00581494
MGP_C57BL6NJ_G0023116	0.797295	0.639308	0.659741	-1.85881	0.0171737	-0.254707
MGP_C57BL6NJ_G0035427	0.851141	0.680456	0.585683	-1.84495	-0.0166009	-0.255728
MGP_C57BL6NJ_G0025291	0.894907	0.709696	0.612378	-1.79014	-0.102158	-0.32468
MGP_C57BL6NJ_G0025441	0.825928	0.70584	0.656524	-1.80551	-0.0248467	-0.357933
MGP_C57BL6NJ_G0019199	0.798009	0.698331	0.75007	-1.79119	-0.249133	-0.206083
MGP_C57BL6NJ_G0022104	0.834435	0.687717	0.701589	-1.80007	-0.146525	-0.277146
MGP_C57BL6NJ_G0024589	0.888929	0.680713	0.560464	-1.84078	-0.11323	-0.176091
MGP_C57BL6NJ_G0020274	0.783521	0.75016	0.638945	-1.83029	-0.113966	-0.228371
MGP_C57BL6NJ_G0026147	0.757497	0.844372	0.577334	-1.81966	-0.134383	-0.22516
MGP_C57BL6NJ_G0022973	0.916567	0.547688	0.547667	-1.88273	-0.00545006	-0.123745
MGP_C57BL6NJ_G0019229	0.894687	0.47932	0.652284	-1.8714	0.0453665	-0.200253
MGP_C57BL6NJ_G0028230	0.87747	0.555476	0.637051	-1.86286	0.00590811	-0.213049
MGP_C57BL6NJ_G0024817	0.74584	0.598408	0.772874	-1.85642	-0.067001	-0.193704
MGP_C57BL6NJ_G0026896	0.727002	0.580966	0.774735	-1.86178	0.0363576	-0.257284
MGP_C57BL6NJ_G0036095	0.698891	0.592463	0.786646	-1.87115	-0.00561125	-0.201239
MGP_C57BL6NJ_G0021608	0.760154	0.444888	0.805284	-1.88845	-0.0286459	-0.0932298
MGP_C57BL6NJ_G0025777	0.77929	0.542522	0.696187	-1.89762	-0.00773501	-0.112647
MGP_C57BL6NJ_G0017338	0.959068	1.0357	0.580494	-1.40367	-0.669281	-0.502308
MGP_C57BL6NJ_G0018767	1.00907	0.932075	0.411554	-1.63861	-0.399694	-0.314389
MGP_C57BL6NJ_G0036387	1.13027	0.861189	0.436129	-1.5492	-0.390112	-0.48828
MGP_C57BL6NJ_G0022547	0.868868	1.09521	0.386452	-1.60915	-0.497275	-0.244112
MGP_C57BL6NJ_G0029041	1.00897	0.918699	0.490237	-1.55592	-0.660405	-0.201584
MGP_C57BL6NJ_G0034084	1.16073	0.910584	0.296262	-1.49995	-0.667835	-0.199783
MGP_C57BL6NJ_G0029535	0.987401	0.826436	0.704047	-1.41757	-0.890393	-0.209925
MGP_C57BL6NJ_G0036503	1.11236	0.767581	0.521287	-1.44505	-0.900236	-0.0559414
MGP_C57BL6NJ_G0030248	0.799885	0.64134	0.820223	-1.69672	-0.627174	0.0624444
MGP_C57BL6NJ_G0030508	0.891464	0.65696	0.75691	-1.67326	-0.633233	0.00115901
MGP_C57BL6NJ_G0024043	1.07418	0.557748	0.753844	-1.57629	-0.68264	-0.126836
MGP_C57BL6NJ_G0031569	1.00851	0.649246	0.714525	-1.53592	-0.831722	-0.0046444
MGP_C57BL6NJ_G0018602	1.23483	0.20856	0.842039	-1.51503	-0.640726	-0.129677
MGP_C57BL6NJ_G0023211	1.22757	0.267574	0.590916	-1.70036	-0.423801	0.038104
MGP_C57BL6NJ_G0017209	0.838245	0.567985	0.822649	-1.78803	-0.263874	-0.17698
MGP_C57BL6NJ_G0021486	0.80785	0.495858	0.890355	-1.79531	-0.254741	-0.144012
MGP_C57BL6NJ_G0024037	0.761212	0.603472	0.917391	-1.75236	-0.307899	-0.221816
MGP_C57BL6NJ_G0036689	0.79102	0.514069	0.997903	-1.71492	-0.280688	-0.307388
MGP_C57BL6NJ_G0016417	1.09801	0.678551	0.688485	-1.56752	-0.452812	-0.44472
MGP_C57BL6NJ_G0021348	1.22924	0.57398	0.653977	-1.50535	-0.555774	-0.396069
MGP_C57BL6NJ_G0026870	0.836833	0.840371	0.752745	-1.61709	-0.608314	-0.204546
MGP_C57BL6NJ_G0031149	0.847004	0.879721	0.761231	-1.55786	-0.65177	-0.278325
MGP_C57BL6NJ_G0031666	0.878021	0.681406	0.930312	-1.57146	-0.52313	-0.395152
MGP_C57BL6NJ_G0034339	0.937827	0.630973	0.866723	-1.59321	-0.618734	-0.223576
MGP_C57BL6NJ_G0030180	0.842996	1.06972	0.484384	-1.43882	-0.0426408	-0.915641
MGP_C57BL6NJ_G0035307	0.761374	1.12885	0.512138	-1.54477	-0.174153	-0.68344
MGP_C57BL6NJ_G0033196	1.09201	0.890165	0.394384	-1.445	-0.0548991	-0.876666
MGP_C57BL6NJ_G0031716	0.877851	1.14098	0.19633	-1.49149	0.086843	-0.81051
MGP_C57BL6NJ_G0035989	0.96936	1.13158	0.279911	-1.4092	-0.136828	-0.834824
MGP_C57BL6NJ_G0025479	1.21462	1.05301	0.131304	-1.2787	-0.299226	-0.821004
MGP_C57BL6NJ_G0031749	1.26909	0.903905	0.185837	-1.35459	-0.186954	-0.817295
MGP_C57BL6NJ_G0021889	1.10021	0.976056	0.124455	-1.60789	-0.122738	-0.470101
MGP_C57BL6NJ_G0025762	1.10928	0.843111	0.23628	-1.59898	0.074082	-0.663775
MGP_C57BL6NJ_G0019016	1.13104	0.484769	0.157941	-1.84974	-0.096882	0.172873
MGP_C57BL6NJ_G0021827	1.03686	0.633693	0.406025	-1.8083	0.0279547	-0.296229
MGP_C57BL6NJ_G0017528	1.12199	0.588985	0.32407	-1.80502	-0.0666768	-0.163351
MGP_C57BL6NJ_G0025813	1.11675	0.659741	0.263381	-1.78119	0.0158348	-0.274519
MGP_C57BL6NJ_G0028277	1.01671	0.69655	0.171207	-1.85752	0.00960555	-0.0365476
MGP_C57BL6NJ_G0035460	0.897438	0.715846	0.341874	-1.87989	0.0816647	-0.156931
MGP_C57BL6NJ_G0030015	1.54595	0.27461	0.0323883	-1.5059	0.14714	-0.494188
MGP_C57BL6NJ_G0024575	1.53805	0.207277	0.36218	-1.4885	-0.146622	-0.472388
MGP_C57BL6NJ_G0035507	1.4632	0.495513	0.261015	-1.47716	-0.161916	-0.580658
MGP_C57BL6NJ_G0026819	1.36512	0.471951	0.343989	-1.61759	-0.381801	-0.181674
MGP_C57BL6NJ_G0027350	1.2137	0.432601	0.424448	-1.76293	-0.200568	-0.107252
MGP_C57BL6NJ_G0018114	1.2862	0.707074	0.289081	-1.57543	-0.230342	-0.476585
MGP_C57BL6NJ_G0019230	1.19915	0.797102	0.380566	-1.53679	-0.23659	-0.603446
MGP_C57BL6NJ_G0021051	1.22584	0.555711	0.43347	-1.66818	-0.0886648	-0.458182
MGP_C57BL6NJ_G0021668	1.20314	0.585807	0.446623	-1.69138	-0.250151	-0.294039
MGP_C57BL6NJ_G0021792	1.39325	0.731676	-0.0610499	-1.11612	-1.11612	0.168355
MGP_C57BL6NJ_G0032850	1.33996	0.973917	0.0703964	-1.08732	-0.985911	-0.311041
MGP_C57BL6NJ_G0035273	1.31	0.919181	-0.0485707	-1.39864	-0.686552	-0.0954106
MGP_C57BL6NJ_G0035768	1.44991	0.780619	0.00714578	-1.32537	-0.696563	-0.215745
MGP_C57BL6NJ_G0022353	1.01903	1.14576	-0.184686	-1.58453	-0.311226	-0.0843563
MGP_C57BL6NJ_G0036561	1.07428	1.09864	-0.134285	-1.55789	-0.438214	-0.0425301
MGP_C57BL6NJ_G0017360	0.771691	1.25922	0.142091	-1.51653	-0.704618	0.0481469
MGP_C57BL6NJ_G0025734	0.758935	1.02455	0.544332	-1.57386	-0.774936	0.0209783
MGP_C57BL6NJ_G0026187	0.398454	1.814	-0.384134	-0.82884	-0.170643	-0.82884
MGP_C57BL6NJ_G0029929	0.191175	1.89987	-0.0804689	-0.670192	-0.670192	-0.670192
MGP_C57BL6NJ_G0017456	0.593256	1.64877	0.144373	-0.761928	-0.746064	-0.87841
MGP_C57BL6NJ_G0032193	0.384681	1.67734	0.330775	-0.753038	-0.725953	-0.913811
MGP_C57BL6NJ_G0016860	1.23886	1.34176	-0.645155	-0.645155	-0.645155	-0.645155
MGP_C57BL6NJ_G0034471	0.862362	1.62003	-0.358937	-0.707817	-0.707817	-0.707817
MGP_C57BL6NJ_G0027789	0.993716	1.35822	0.0722723	-1.17238	-0.67347	-0.578363
MGP_C57BL6NJ_G0033069	1.15782	1.23523	0.0131184	-0.98628	-0.433601	-0.98628
MGP_C57BL6NJ_G0030252	1.01664	1.34947	0.104341	-0.607885	-0.807984	-1.05458
MGP_C57BL6NJ_G0021334	0.926308	1.31339	0.373979	-0.871226	-0.871226	-0.871226
MGP_C57BL6NJ_G0031791	1.12414	1.07292	0.453957	-0.961617	-0.72778	-0.961617
MGP_C57BL6NJ_G0031985	1.14748	1.09376	0.398	-0.91319	-0.812861	-0.91319
MGP_C57BL6NJ_G0020802	1.00114	1.28823	0.289301	-1.0059	-0.732431	-0.840344
MGP_C57BL6NJ_G0025294	1.10505	1.18152	0.304341	-1.04665	-0.737342	-0.806913
MGP_C57BL6NJ_G0016697	0.219392	-0.540982	1.94454	-0.540982	-0.540982	-0.540982
MGP_C57BL6NJ_G0018997	0.606464	-0.132042	1.6947	-0.893521	-0.382083	-0.893521
MGP_C57BL6NJ_G0031794	0.651811	0.228744	1.55455	-0.958674	-0.517758	-0.958674
MGP_C57BL6NJ_G0024303	1.13384	0.0259589	1.23709	-0.981048	-0.377314	-1.03852
MGP_C57BL6NJ_G0031295	1.37607	0.174339	0.888762	-1.03776	-0.363655	-1.03776
MGP_C57BL6NJ_G0019357	0.911897	0.384144	1.12081	-1.5076	-0.256593	-0.652656
MGP_C57BL6NJ_G0021279	0.815492	0.259497	1.27794	-1.50025	-0.325811	-0.526876
MGP_C57BL6NJ_G0019734	1.12205	0.28502	0.976962	-1.36464	-0.107518	-0.91187
MGP_C57BL6NJ_G0023205	0.934323	0.181657	1.15443	-1.49326	-0.0498072	-0.727337
MGP_C57BL6NJ_G0018407	0.896159	0.0784201	1.46013	-0.965389	-0.88853	-0.580788
MGP_C57BL6NJ_G0031783	0.933446	0.0694469	1.41246	-1.1277	-0.762318	-0.525337
MGP_C57BL6NJ_G0022036	0.992068	0.331441	1.28189	-0.868467	-0.868467	-0.868467
MGP_C57BL6NJ_G0030966	1.20682	0.286291	1.09691	-0.967853	-0.865693	-0.756473
MGP_C57BL6NJ_G0024280	0.932439	0.0594905	1.45812	-0.816682	-0.816682	-0.816682
MGP_C57BL6NJ_G0029999	1.18169	0.00363544	1.26432	-0.790929	-0.785382	-0.87333
MGP_C57BL6NJ_G0027640	1.38017	-0.537797	1.19346	-0.678613	-0.678613	-0.678613
MGP_C57BL6NJ_G0025097	1.19056	-0.140994	1.16937	-1.34722	-0.448331	-0.423378
MGP_C57BL6NJ_G0028396	1.36241	-0.126199	1.05873	-1.04711	-0.880828	-0.367006
MGP_C57BL6NJ_G0017101	-0.204338	0.994369	1.48992	-0.653874	-0.813039	-0.813039
MGP_C57BL6NJ_G0023317	0.00232668	0.98014	1.43568	-0.942743	-0.715788	-0.759618
MGP_C57BL6NJ_G0021314	-0.00776867	1.18219	1.25572	-0.615062	-0.907537	-0.907537
MGP_C57BL6NJ_G0016323	-0.108209	1.27596	1.19725	-0.835599	-0.936528	-0.592873
MGP_C57BL6NJ_G0021635	-0.126268	1.34552	1.14484	-0.788031	-0.788031	-0.788031
MGP_C57BL6NJ_G0025273	0.204988	1.2137	1.13626	-0.906276	-0.742397	-0.906276
MGP_C57BL6NJ_G0031147	0.325638	1.20321	1.08212	-0.892236	-0.826495	-0.892236
MGP_C57BL6NJ_G0035984	0.168361	1.29934	1.02463	-1.02166	-0.502635	-0.968026
MGP_C57BL6NJ_G0036509	0.112255	1.48331	0.832749	-0.955581	-0.517153	-0.955581
MGP_C57BL6NJ_G0023988	0.576371	1.28545	0.755772	-1.14394	-0.89464	-0.579014
MGP_C57BL6NJ_G0024290	0.329536	1.4025	0.776011	-1.11424	-0.930707	-0.463098
MGP_C57BL6NJ_G0033191	0.314096	1.49742	0.639112	-1.1039	-0.923547	-0.423186
MGP_C57BL6NJ_G0033195	0.233018	1.59645	0.581359	-0.831299	-0.544227	-1.0353
MGP_C57BL6NJ_G0020484	0.353687	1.47566	0.723195	-0.884065	-0.854609	-0.813871
MGP_C57BL6NJ_G0032650	0.210053	1.50614	0.780622	-0.832273	-0.832273	-0.832273
MGP_C57BL6NJ_G0018015	0.380739	1.4743	0.671617	-0.626689	-1.07789	-0.822074
MGP_C57BL6NJ_G0019417	0.508465	1.47663	0.590883	-0.858659	-0.858659	-0.858659
MGP_C57BL6NJ_G0024996	0.434927	1.55171	0.531103	-0.766289	-0.875723	-0.875723
MGP_C57BL6NJ_G0027665	0.288122	0.922881	1.2793	-1.25561	-0.405349	-0.829346
MGP_C57BL6NJ_G0025761	0.556226	0.803217	1.25766	-1.03696	-0.525444	-1.0547
MGP_C57BL6NJ_G0028794	0.537627	0.801833	1.26723	-1.02359	-0.507573	-1.07553
MGP_C57BL6NJ_G0021232	0.16889	0.7956	1.2829	-1.31233	0.0488523	-0.983907
MGP_C57BL6NJ_G0036571	-0.146626	1.12887	1.2894	-0.939169	-0.297581	-1.03489
MGP_C57BL6NJ_G0026752	0.408085	0.68446	1.25267	-1.56652	-0.52832	-0.250367
MGP_C57BL6NJ_G0022943	0.440643	0.675472	1.15949	-1.55527	-0.764435	0.044097
MGP_C57BL6NJ_G0016727	0.420584	0.622486	1.12418	-1.71489	-0.479835	0.0274771
MGP_C57BL6NJ_G0028032	0.543024	0.66045	1.11442	-1.63598	-0.583921	-0.0979889
MGP_C57BL6NJ_G0026726	0.311508	0.907906	1.04467	-1.62791	-0.0584038	-0.57777
MGP_C57BL6NJ_G0033192	0.174533	1.12357	0.917116	-1.61646	-0.107266	-0.491494
MGP_C57BL6NJ_G0031709	0.340195	1.14506	0.961795	-1.47231	-0.538874	-0.435871
MGP_C57BL6NJ_G0036104	0.48114	0.944276	1.01983	-1.56192	-0.382222	-0.501101
MGP_C57BL6NJ_G0026838	0.635616	0.858897	0.967802	-1.59543	-0.417572	-0.449313
MGP_C57BL6NJ_G0027303	0.567281	0.809581	1.0076	-1.65436	-0.41028	-0.319827
MGP_C57BL6NJ_G0017609	1.45851	0.572406	0.312817	-0.180534	-0.888058	-1.27515
MGP_C57BL6NJ_G0025065	1.55136	0.513102	0.318137	-0.320554	-1.03103	-1.03103
MGP_C57BL6NJ_G0025676	1.61113	0.457899	0.295597	-0.435438	-0.796216	-1.13298
MGP_C57BL6NJ_G0023189	1.19752	0.905152	0.53236	-0.72263	-1.19327	-0.719134
MGP_C57BL6NJ_G0030070	1.29615	0.759287	0.541876	-0.813093	-1.20597	-0.578252
MGP_C57BL6NJ_G0018704	1.48619	0.711317	0.335822	-0.71475	-0.97257	-0.84601
MGP_C57BL6NJ_G0022223	1.3701	0.72121	0.46081	-0.511533	-1.17306	-0.867525
MGP_C57BL6NJ_G0034457	1.44798	0.61988	0.457325	-0.509566	-1.10516	-0.910456
MGP_C57BL6NJ_G0017505	1.29125	0.778293	0.597124	-0.888889	-0.888889	-0.888889
MGP_C57BL6NJ_G0031776	1.29961	0.686071	0.682958	-0.889547	-0.889547	-0.889547
MGP_C57BL6NJ_G0031789	1.43015	0.619861	0.555142	-0.868383	-0.868383	-0.868383
MGP_C57BL6NJ_G0031533	1.49555	0.562944	0.505333	-0.854609	-0.854609	-0.854609
MGP_C57BL6NJ_G0031774	1.49954	0.554756	0.506595	-0.866237	-0.866237	-0.828413
MGP_C57BL6NJ_G0016472	1.51127	0.432617	0.6008	-0.887981	-0.768722	-0.887981
MGP_C57BL6NJ_G0031146	1.50264	0.569299	0.471121	-0.929634	-0.683792	-0.929634
MGP_C57BL6NJ_G0025030	1.1667	0.568282	0.945357	-1.01847	-0.786259	-0.875604
MGP_C57BL6NJ_G0028719	1.1013	0.65792	0.949461	-0.933711	-0.940916	-0.834059
MGP_C57BL6NJ_G0023505	1.24843	0.633558	0.794562	-0.95093	-0.95093	-0.774694
MGP_C57BL6NJ_G0023250	1.21659	0.587318	0.876514	-0.804702	-0.937858	-0.937858
MGP_C57BL6NJ_G0031145	1.3081	0.435577	0.888573	-0.877417	-0.877417	-0.877417
MGP_C57BL6NJ_G0016896	1.11232	0.621186	0.946451	-0.795395	-0.751643	-1.13291
MGP_C57BL6NJ_G0027782	1.16585	0.760272	0.716267	-0.583653	-0.81737	-1.24137
MGP_C57BL6NJ_G0027780	0.761409	0.825175	0.894268	-0.057522	-1.20634	-1.21699
MGP_C57BL6NJ_G0033516	0.621689	0.888917	0.952468	-0.0577235	-1.10281	-1.30254
MGP_C57BL6NJ_G0033713	1.03142	0.953522	0.630789	-0.402397	-1.01257	-1.20077
MGP_C57BL6NJ_G0024364	1.00526	0.851725	0.70389	-0.254122	-1.00601	-1.30074
MGP_C57BL6NJ_G0026328	0.93289	0.868891	0.801065	-0.311168	-1.07402	-1.21766
MGP_C57BL6NJ_G0029252	1.05169	0.974083	0.571086	-0.375594	-1.18437	-1.0369
MGP_C57BL6NJ_G0017175	0.895686	0.985893	0.756178	-0.407258	-1.13163	-1.09887
MGP_C57BL6NJ_G0029304	0.988988	0.896037	0.75766	-0.4379	-1.20887	-0.995913
MGP_C57BL6NJ_G0031866	0.939534	0.943271	0.803853	-0.566375	-1.14	-0.980282
MGP_C57BL6NJ_G0020437	0.740334	1.3364	0.505269	-0.571929	-1.18298	-0.827095
MGP_C57BL6NJ_G0019858	0.720954	1.0855	0.882891	-0.624056	-1.04412	-1.02117
MGP_C57BL6NJ_G0021765	0.628403	1.21488	0.754207	-0.410217	-1.09364	-1.09364
MGP_C57BL6NJ_G0027378	1.2614	0.950031	0.253792	-0.311609	-1.19028	-0.963338
MGP_C57BL6NJ_G0027664	1.15751	1.14376	0.162479	-0.399065	-1.16438	-0.900304
MGP_C57BL6NJ_G0034463	1.30184	0.907654	0.40987	-0.740534	-0.939414	-0.939414
MGP_C57BL6NJ_G0017807	1.23551	0.895413	0.513428	-0.696004	-0.860873	-1.08748
MGP_C57BL6NJ_G0028552	1.20809	0.948646	0.457386	-0.561811	-0.956349	-1.09597
MGP_C57BL6NJ_G0018738	1.25622	0.949903	0.342626	-0.590724	-0.717953	-1.24007
MGP_C57BL6NJ_G0021823	1.15983	0.939802	0.471666	-0.434198	-0.872371	-1.26473
MGP_C57BL6NJ_G0018603	1.44715	0.583779	0.521364	-1.1302	-0.66291	-0.759178
MGP_C57BL6NJ_G0018491	1.24966	0.694121	0.649563	-1.30493	-0.614377	-0.674036
MGP_C57BL6NJ_G0034819	1.31895	0.605659	0.650033	-1.20324	-0.482176	-0.889228
MGP_C57BL6NJ_G0028093	1.19972	0.458438	0.92597	-1.25396	-0.799237	-0.530937
MGP_C57BL6NJ_G0026256	1.18415	0.680423	0.789013	-1.21562	-0.737397	-0.700562
MGP_C57BL6NJ_G0030178	1.2267	0.611515	0.812546	-1.14476	-0.662036	-0.84396
MGP_C57BL6NJ_G0016393	1.17256	0.669161	0.678395	-1.46212	-0.42989	-0.628105
MGP_C57BL6NJ_G0024031	1.0739	0.750504	0.727433	-1.46072	-0.432932	-0.658186
MGP_C57BL6NJ_G0027662	1.13191	0.795811	0.649159	-1.36457	-0.422916	-0.789395
MGP_C57BL6NJ_G0030739	1.07787	0.861887	0.68021	-1.31092	-0.48521	-0.823838
MGP_C57BL6NJ_G0028355	1.09494	0.863822	0.58518	-1.44616	-0.4526	-0.645175
MGP_C57BL6NJ_G0031284	1.07786	0.874595	0.634866	-1.39412	-0.510497	-0.682703
MGP_C57BL6NJ_G0016625	1.15249	0.852042	0.544079	-1.39394	-0.435769	-0.718904
MGP_C57BL6NJ_G0023188	1.20001	0.882891	0.486109	-1.323	-0.529267	-0.716738
MGP_C57BL6NJ_G0016348	0.991475	0.715439	0.900205	-1.39165	-0.509302	-0.706164
MGP_C57BL6NJ_G0021900	1.06137	0.67643	0.841395	-1.41697	-0.469776	-0.692448
MGP_C57BL6NJ_G0017425	0.973368	0.619343	0.881715	-1.55034	-0.287369	-0.636714
MGP_C57BL6NJ_G0019993	0.916856	0.737774	0.836283	-1.54314	-0.267395	-0.680375
MGP_C57BL6NJ_G0018210	0.89416	0.952324	0.753117	-1.34896	-0.375693	-0.874945
MGP_C57BL6NJ_G0033073	0.853874	0.941235	0.778477	-1.42204	-0.359305	-0.792238
MGP_C57BL6NJ_G0016858	0.864854	0.993595	0.62397	-1.47351	-0.191981	-0.816926
MGP_C57BL6NJ_G0022499	1.01828	0.862268	0.656238	-1.41267	-0.277905	-0.846217
MGP_C57BL6NJ_G0017214	0.973868	0.94224	0.515091	-1.56992	-0.253298	-0.607982
MGP_C57BL6NJ_G0017216	1.00863	0.897132	0.588201	-1.53494	-0.390277	-0.568747
MGP_C57BL6NJ_G0034806	0.949895	0.911655	0.66474	-1.51604	-0.415624	-0.594624
MGP_C57BL6NJ_G0022351	0.855741	0.902334	0.724445	-1.58763	-0.385366	-0.509529
MGP_C57BL6NJ_G0023101	0.87156	0.890883	0.682145	-1.6028	-0.250421	-0.591368
MGP_C57BL6NJ_G0017215	0.871035	0.934689	0.68765	-1.55118	-0.321488	-0.620705
MGP_C57BL6NJ_G0035990	0.894695	0.900684	0.684475	-1.57634	-0.336052	-0.567467
MGP_C57BL6NJ_G0018029	0.615132	0.941461	0.914846	-1.49319	-0.180727	-0.797521
MGP_C57BL6NJ_G0024030	0.901868	0.872652	0.745356	-1.50566	-0.297082	-0.71713
MGP_C57BL6NJ_G0031672	0.784232	0.890776	0.848109	-1.53361	-0.370904	-0.6186
MGP_C57BL6NJ_G0024305	0.661949	1.1389	0.722215	-1.48091	-0.461917	-0.580242
MGP_C57BL6NJ_G0030249	0.770198	0.856371	0.957211	-1.45556	-0.531886	-0.596334
MGP_C57BL6NJ_G0031781	0.84969	0.870018	0.873837	-1.44918	-0.536184	-0.608182
MGP_C57BL6NJ_G0018675	0.700534	1.03353	0.87195	-1.39024	-0.540954	-0.674822
MGP_C57BL6NJ_G0019246	0.681534	0.949129	0.919761	-1.49311	-0.542333	-0.514981
MGP_C57BL6NJ_G0016281	0.868486	0.815033	0.977021	-1.28686	-0.569851	-0.803824
MGP_C57BL6NJ_G0016632	0.867413	0.840101	0.976403	-1.13746	-0.55088	-0.995573
MGP_C57BL6NJ_G0035717	0.926276	0.872853	0.894029	-1.15133	-0.588329	-0.953496
MGP_C57BL6NJ_G0025298	1.06228	0.890366	0.72197	-1.09379	-0.554093	-1.02673
MGP_C57BL6NJ_G0031142	0.975661	0.922995	0.796806	-1.08478	-0.596333	-1.01434
MGP_C57BL6NJ_G0018024	0.967202	0.881831	0.786306	-1.2244	-0.410438	-1.0005
MGP_C57BL6NJ_G0018988	0.986557	0.955237	0.708749	-1.15531	-0.46539	-1.02985
MGP_C57BL6NJ_G0033520	0.932477	0.931342	0.804361	-1.13325	-0.490127	-1.0448
MGP_C57BL6NJ_G0027200	1.06164	0.797199	0.802987	-1.23713	-0.558681	-0.866016
MGP_C57BL6NJ_G0032975	0.952508	0.955335	0.741837	-1.31771	-0.60984	-0.722127
MGP_C57BL6NJ_G0031790	0.655456	1.09144	0.943156	-1.0103	-0.669461	-1.0103
MGP_C57BL6NJ_G0020848	0.793614	1.00324	0.9152	-1.00305	-0.681844	-1.02716
MGP_C57BL6NJ_G0035291	0.765267	0.997548	0.945532	-1.01839	-0.671574	-1.01839
MGP_C57BL6NJ_G0017500	0.769706	0.940873	1.01038	-0.981796	-0.757366	-0.981796
MGP_C57BL6NJ_G0032597	0.724036	0.981304	1.00055	-1.01083	-0.684231	-1.01083
MGP_C57BL6NJ_G0031148	0.902919	1.06195	0.738588	-1.04406	-0.680289	-0.979103
MGP_C57BL6NJ_G0035219	0.863299	1.06234	0.78872	-0.994389	-0.725576	-0.994389
MGP_C57BL6NJ_G0024272	0.830405	1.13695	0.712085	-1.12041	-0.637891	-0.921141
MGP_C57BL6NJ_G0035217	0.902392	1.12974	0.649686	-1.01635	-0.649118	-1.01635
MGP_C57BL6NJ_G0025296	0.858864	1.03955	0.768844	-1.07214	-0.506964	-1.08815
MGP_C57BL6NJ_G0030138	0.800159	1.04659	0.808298	-1.22873	-0.508137	-0.918182
MGP_C57BL6NJ_G0025295	1.22503	0.919154	0.487818	-0.971704	-0.613346	-1.04695
MGP_C57BL6NJ_G0019403	1.15882	0.86621	0.661492	-0.998352	-0.689814	-0.998352
MGP_C57BL6NJ_G0035904	1.13334	0.938444	0.596153	-1.0583	-0.625913	-0.983725
MGP_C57BL6NJ_G0024108	1.07885	0.823574	0.820586	-0.957423	-0.81519	-0.950396
MGP_C57BL6NJ_G0019228	1.09641	0.908219	0.699253	-0.922277	-0.738487	-1.04312
MGP_C57BL6NJ_G0021992	1.04833	0.891302	0.769153	-0.983266	-0.690303	-1.03521
MGP_C57BL6NJ_G0029746	1.07993	0.910041	0.716045	-0.99399	-0.715796	-0.996231
MGP_C57BL6NJ_G0026191	1.25076	0.777839	0.63274	-1.07668	-0.704586	-0.880076
MGP_C57BL6NJ_G0016359	1.17222	0.900449	0.616742	-0.971976	-0.771503	-0.945926
MGP_C57BL6NJ_G0023274	1.14757	0.935315	0.611306	-0.948096	-0.797999	-0.948096
MGP_C57BL6NJ_G0019456	1.19302	0.841847	0.662795	-0.942667	-0.8833	-0.871696
MGP_C57BL6NJ_G0025122	1.19183	0.823126	0.684883	-0.923097	-0.853648	-0.923097
MGP_C57BL6NJ_G0017390	1.22665	0.584996	0.805179	-1.04737	-0.487911	-1.08155
MGP_C57BL6NJ_G0027394	1.26034	0.62686	0.686328	-1.09585	-0.381832	-1.09585
MGP_C57BL6NJ_G0031675	0.920836	0.858244	0.896778	-0.944574	-0.533696	-1.19759
MGP_C57BL6NJ_G0023257	1.05558	0.84921	0.759167	-0.881794	-0.557412	-1.22475
MGP_C57BL6NJ_G0030443	1.14563	0.843421	0.659514	-0.890858	-0.560397	-1.19731
MGP_C57BL6NJ_G0034805	1.12572	0.85328	0.682963	-0.888261	-0.590024	-1.18368
MGP_C57BL6NJ_G0031674	0.750692	0.969299	0.882731	-0.864499	-0.389716	-1.34851
MGP_C57BL6NJ_G0034565	0.724378	1.07067	0.78879	-0.996244	-0.317334	-1.27026
MGP_C57BL6NJ_G0021793	1.13662	0.866098	0.607691	-1.10009	-0.410234	-1.10009
MGP_C57BL6NJ_G0030143	1.05595	0.970034	0.547046	-0.979781	-0.340802	-1.25245
MGP_C57BL6NJ_G0029333	0.932656	1.17092	0.523234	-1.05134	-0.524137	-1.05134
MGP_C57BL6NJ_G0018587	1.04067	1.04091	0.597518	-1.01132	-0.656457	-1.01132
MGP_C57BL6NJ_G0030381	0.995083	1.01058	0.682794	-0.907753	-0.652799	-1.1279
MGP_C57BL6NJ_G0036758	1.02703	0.988503	0.678035	-0.924671	-0.673687	-1.09521
MGP_C57BL6NJ_G0035517	0.444168	1.10382	0.782376	-1.05896	-1.3577	0.0862922
MGP_C57BL6NJ_G0020457	1.3027	0.695931	0.423378	-0.904514	-1.33748	-0.180019
MGP_C57BL6NJ_G0028139	1.054	0.827749	0.504526	-0.940178	-1.43713	-0.00896275
MGP_C57BL6NJ_G0023869	1.06756	0.932392	0.559738	-1.12562	-1.15428	-0.279791
MGP_C57BL6NJ_G0020545	1.05079	0.827781	0.784943	-1.15334	-1.00407	-0.5061
MGP_C57BL6NJ_G0028623	1.00564	0.910003	0.721057	-1.27943	-0.881907	-0.475356
MGP_C57BL6NJ_G0026565	0.715312	0.88387	1.11403	-0.817862	-0.92587	-0.969484
MGP_C57BL6NJ_G0029299	0.727506	0.909404	1.05921	-0.642601	-1.01271	-1.04081
MGP_C57BL6NJ_G0031140	0.564468	1.05481	1.07333	-0.897536	-0.897536	-0.897536
MGP_C57BL6NJ_G0022343	0.511137	0.934145	1.22232	-0.889202	-0.889202	-0.889202
MGP_C57BL6NJ_G0023263	0.428502	0.971883	1.242	-0.8455	-0.898442	-0.898442
MGP_C57BL6NJ_G0022832	0.536499	0.529135	1.49114	-0.711592	-0.922588	-0.922588
MGP_C57BL6NJ_G0031727	0.496823	0.72644	1.39375	-0.872337	-0.872337	-0.872337
MGP_C57BL6NJ_G0036507	0.581707	0.569239	1.43788	-0.940481	-0.707865	-0.940481
MGP_C57BL6NJ_G0031992	0.795762	0.453364	1.34836	-0.857365	-1.08692	-0.653201
MGP_C57BL6NJ_G0025757	1.05312	0.523823	1.10393	-0.91282	-0.91282	-0.855229
MGP_C57BL6NJ_G0022435	0.913745	0.61235	1.16957	-0.898555	-0.898555	-0.898555
MGP_C57BL6NJ_G0031667	0.880254	0.629495	1.17987	-1.02562	-0.846728	-0.817271
MGP_C57BL6NJ_G0022593	0.615858	0.824085	1.22368	-1.00279	-1.00279	-0.658052
MGP_C57BL6NJ_G0031991	0.669677	0.860063	1.1427	-1.06031	-1.00896	-0.603165
MGP_C57BL6NJ_G0029397	0.707769	0.899094	1.00901	-1.25316	-0.976057	-0.38665
MGP_C57BL6NJ_G0020132	0.776292	0.917184	0.968198	-1.29084	-0.765666	-0.60517
MGP_C57BL6NJ_G0029399	0.920522	0.814978	0.913786	-1.28129	-0.878982	-0.489017
MGP_C57BL6NJ_G0024815	0.888965	0.643538	1.08389	-0.607987	-1.34648	-0.661926
MGP_C57BL6NJ_G0021903	0.855851	0.950908	0.823461	-0.890352	-1.3052	-0.43467
MGP_C57BL6NJ_G0033463	0.856516	0.944735	0.894624	-0.896469	-1.1744	-0.625007
MGP_C57BL6NJ_G0031800	0.906543	1.1396	0.621832	-1.0758	-0.980417	-0.611758
MGP_C57BL6NJ_G0017057	0.876013	1.19647	0.62006	-0.897514	-0.897514	-0.897514
MGP_C57BL6NJ_G0024102	0.939137	1.06784	0.714014	-0.906996	-0.906996	-0.906996
MGP_C57BL6NJ_G0027661	0.942521	1.00969	0.776999	-0.9403	-0.9403	-0.848606
MGP_C57BL6NJ_G0024068	1.10514	0.879787	0.728789	-0.864753	-1.01495	-0.834018
MGP_C57BL6NJ_G0026941	1.11729	0.909908	0.66613	-0.771657	-1.09892	-0.822754
MGP_C57BL6NJ_G0019244	1.12353	1.05901	0.477645	-0.778805	-1.01717	-0.864214
MGP_C57BL6NJ_G0022511	1.02033	1.11785	0.531512	-0.977859	-0.986367	-0.705473
MGP_C57BL6NJ_G0030069	1.07516	1.0952	0.480369	-0.849637	-1.08756	-0.713536
MGP_C57BL6NJ_G0033918	0.927525	0.794865	1.00977	-0.910722	-0.910722	-0.910722
MGP_C57BL6NJ_G0036320	1.00383	0.778669	0.944101	-1.00116	-0.906124	-0.819318
MGP_C57BL6NJ_G0017011	0.916272	0.897608	0.914524	-0.987991	-0.752423	-0.987991
MGP_C57BL6NJ_G0022863	0.98842	0.882374	0.848383	-1.10438	-0.832369	-0.782429
MGP_C57BL6NJ_G0030193	0.733693	1.05561	0.934783	-0.90803	-0.90803	-0.90803
MGP_C57BL6NJ_G0036730	0.763419	1.01391	0.943092	-0.980818	-0.980818	-0.758784
MGP_C57BL6NJ_G0019926	0.65336	1.22316	0.81442	-0.89698	-0.89698	-0.89698
MGP_C57BL6NJ_G0019696	0.781963	1.12502	0.798545	-0.791207	-1.0731	-0.841218
MGP_C57BL6NJ_G0028089	0.806897	1.11987	0.791065	-0.838438	-0.939695	-0.939695
MGP_C57BL6NJ_G0018402	-0.716134	0.164739	-0.518516	-1.23701	1.15118	1.15574
MGP_C57BL6NJ_G0036105	-0.783489	0.164618	-0.412778	-1.25459	1.11863	1.16761
MGP_C57BL6NJ_G0017490	-0.495104	0.137902	-0.557062	-1.35784	1.15294	1.11916
MGP_C57BL6NJ_G0016518	-0.477617	0.118852	-0.660287	-1.28788	1.12063	1.1863
MGP_C57BL6NJ_G0028796	-0.50909	0.0709138	-0.726045	-1.19441	1.16397	1.19466
MGP_C57BL6NJ_G0021594	-0.630061	-0.0654803	-0.652667	-1.09088	1.28353	1.15556
MGP_C57BL6NJ_G0022963	-0.685862	-0.0809746	-0.540477	-1.12589	1.17748	1.25572
MGP_C57BL6NJ_G0026849	-0.776231	-0.0420679	-0.544019	-1.0692	1.23038	1.20113
MGP_C57BL6NJ_G0026718	-0.668295	0.0122315	-0.586614	-1.15514	1.20177	1.19605
MGP_C57BL6NJ_G0035566	-0.657422	0.0175058	-0.650759	-1.1165	1.19425	1.21292
MGP_C57BL6NJ_G0024456	-0.668147	0.12147	-0.638971	-1.16725	1.173	1.1799
MGP_C57BL6NJ_G0035509	-0.734534	0.0867446	-0.574547	-1.14706	1.18987	1.17953
MGP_C57BL6NJ_G0028375	-0.816274	0.136901	-0.651269	-1.03937	1.21705	1.15296
MGP_C57BL6NJ_G0034494	-0.791042	0.119099	-0.620156	-1.07842	1.22269	1.14783
MGP_C57BL6NJ_G0018722	-0.726889	0.117861	-0.620013	-1.13211	1.13513	1.22603
MGP_C57BL6NJ_G0020622	-0.777006	0.119793	-0.646099	-1.07047	1.16302	1.21076
MGP_C57BL6NJ_G0017784	-0.814146	-0.0217542	-0.625103	-0.979071	1.148	1.29207
MGP_C57BL6NJ_G0030646	-0.820971	0.0266192	-0.616819	-1.00196	1.08549	1.32764
MGP_C57BL6NJ_G0023574	-0.885817	0.0595944	-0.552629	-1.0161	1.14266	1.25229
MGP_C57BL6NJ_G0016692	-0.881906	-0.0346074	-0.511574	-0.999947	1.13732	1.29071
MGP_C57BL6NJ_G0025102	-0.857297	-0.0133275	-0.539006	-1.01152	1.11015	1.311
MGP_C57BL6NJ_G0021031	-0.932244	0.0439882	-0.601346	-0.921452	1.28203	1.12902
MGP_C57BL6NJ_G0026858	-0.866265	0.0341738	-0.587052	-0.992339	1.28134	1.13014
MGP_C57BL6NJ_G0017236	-0.935285	-0.0281643	-0.484643	-0.97574	1.20874	1.2151
MGP_C57BL6NJ_G0024794	-0.935195	-0.0152414	-0.590696	-0.896764	1.23307	1.20483
MGP_C57BL6NJ_G0021187	-0.744481	-0.0734497	-0.767888	-0.886405	1.30336	1.16887
MGP_C57BL6NJ_G0027630	-0.781715	-0.124551	-0.785416	-0.801563	1.3009	1.19235
MGP_C57BL6NJ_G0034037	-0.700088	-0.244692	-0.713458	-0.867075	1.27937	1.24594
MGP_C57BL6NJ_G0018169	-0.758409	-0.210682	-0.737954	-0.81278	1.27544	1.24438
MGP_C57BL6NJ_G0029706	-0.726342	-0.231441	-0.733092	-0.832938	1.29955	1.22426
MGP_C57BL6NJ_G0027588	-0.7298	-0.268217	-0.73378	-0.800778	1.33264	1.19994
MGP_C57BL6NJ_G0034791	-0.750736	-0.208609	-0.766717	-0.787418	1.37121	1.14227
MGP_C57BL6NJ_G0017126	-0.680658	-0.139616	-0.721974	-0.946276	1.19872	1.2898
MGP_C57BL6NJ_G0020049	-0.701453	-0.176481	-0.730505	-0.895019	1.18666	1.3168
MGP_C57BL6NJ_G0027594	-0.716446	-0.202133	-0.693933	-0.898248	1.20296	1.3078
MGP_C57BL6NJ_G0019101	-0.79957	-0.0774327	-0.714717	-0.879591	1.14483	1.32648
MGP_C57BL6NJ_G0017736	-0.832253	-0.108618	-0.707351	-0.838484	1.25573	1.23097
MGP_C57BL6NJ_G0022106	-0.818143	-0.147212	-0.636092	-0.89154	1.2147	1.27829
MGP_C57BL6NJ_G0033364	-0.769967	-0.174427	-0.697655	-0.864076	1.21405	1.29207
MGP_C57BL6NJ_G0024580	-0.659157	-0.0474446	-0.815948	-0.935695	1.24463	1.21362
MGP_C57BL6NJ_G0017375	-0.609466	-0.144645	-0.742707	-0.98636	1.24487	1.23831
MGP_C57BL6NJ_G0023260	-0.62728	-0.134266	-0.751572	-0.969935	1.23512	1.24793
MGP_C57BL6NJ_G0033365	-0.742799	-0.0853014	-0.670008	-0.96757	1.32252	1.14316
MGP_C57BL6NJ_G0030867	-0.750297	-0.187433	-0.659564	-0.907534	1.30808	1.19674
MGP_C57BL6NJ_G0016733	-0.761997	-0.155326	-0.614272	-0.95824	1.24921	1.24063
MGP_C57BL6NJ_G0017632	-0.721362	-0.171042	-0.653508	-0.951093	1.27317	1.22383
MGP_C57BL6NJ_G0020355	-0.479823	-0.191303	-0.791403	-1.01263	1.14206	1.33309
MGP_C57BL6NJ_G0023364	-0.582886	-0.296443	-0.638209	-0.993509	1.14301	1.36803
MGP_C57BL6NJ_G0031483	-0.654321	-0.0184209	-0.82074	-0.934642	1.01853	1.40959
MGP_C57BL6NJ_G0016384	-0.693072	-0.0326263	-0.729554	-0.988268	1.11161	1.33191
MGP_C57BL6NJ_G0025934	-0.723288	-0.0471824	-0.763638	-0.916593	1.06983	1.38087
MGP_C57BL6NJ_G0035684	-0.579132	-0.204509	-0.886207	-0.8344	1.19937	1.30488
MGP_C57BL6NJ_G0020983	-0.660982	-0.21513	-0.797309	-0.833553	1.10542	1.40155
MGP_C57BL6NJ_G0027622	-0.646013	-0.164168	-0.85185	-0.831927	1.12855	1.36541
MGP_C57BL6NJ_G0016926	-0.617951	-0.239714	-0.755028	-0.89807	1.12866	1.3821
MGP_C57BL6NJ_G0031874	-0.605908	-0.220445	-0.779202	-0.905231	1.20223	1.30855
MGP_C57BL6NJ_G0019214	-0.978749	-0.0599298	-0.829116	-0.584083	1.27076	1.18112
MGP_C57BL6NJ_G0020636	-0.976951	0.123471	-0.804582	-0.728294	1.24424	1.14212
MGP_C57BL6NJ_G0016370	-0.768565	-0.03515	-0.990509	-0.653077	1.27757	1.16973
MGP_C57BL6NJ_G0016976	-0.834594	-0.0589021	-0.901487	-0.669423	1.26775	1.19666
MGP_C57BL6NJ_G0029467	-0.84882	-0.0667955	-0.831807	-0.716969	1.35963	1.10476
MGP_C57BL6NJ_G0030156	-0.858711	-0.0688577	-0.777271	-0.765217	1.32877	1.14129
MGP_C57BL6NJ_G0022600	-0.819369	0.0211889	-0.819369	-0.819369	1.30839	1.12853
MGP_C57BL6NJ_G0032460	-0.860613	0.0938559	-0.828479	-0.810431	1.28572	1.11995
MGP_C57BL6NJ_G0030664	-0.862294	-0.0446154	-0.653466	-0.880974	1.03195	1.4094
MGP_C57BL6NJ_G0029975	-0.840978	-0.160739	-0.753752	-0.728208	1.0367	1.44698
MGP_C57BL6NJ_G0031372	-0.722215	-0.157754	-0.7571	-0.844931	1.03334	1.44866
MGP_C57BL6NJ_G0025470	-0.823092	0.0617155	-0.85229	-0.802183	1.08413	1.33172
MGP_C57BL6NJ_G0017504	-0.898795	0.00319119	-0.874086	-0.661204	1.08069	1.35021
MGP_C57BL6NJ_G0035682	-0.913103	0.0205161	-0.778605	-0.74668	1.01017	1.4077
MGP_C57BL6NJ_G0017329	-0.823685	-0.18205	-0.736199	-0.761706	1.12511	1.37853
MGP_C57BL6NJ_G0025994	-0.832413	-0.168757	-0.7567	-0.745457	1.15951	1.34382
MGP_C57BL6NJ_G0017257	-0.792338	-0.152733	-0.798305	-0.757171	1.17312	1.32743
MGP_C57BL6NJ_G0021333	-0.805404	-0.0844873	-0.805404	-0.779089	1.12049	1.3539
MGP_C57BL6NJ_G0018713	-0.967314	-0.115482	-0.716136	-0.667978	1.07677	1.39014
MGP_C57BL6NJ_G0024887	-0.947276	-0.161562	-0.774159	-0.605775	1.16287	1.3259
MGP_C57BL6NJ_G0032204	-0.577808	-0.0365511	-1.13502	-0.669555	1.17335	1.24558
MGP_C57BL6NJ_G0035237	-0.629879	0.111977	-1.04964	-0.806575	1.08655	1.28757
MGP_C57BL6NJ_G0021262	-0.714558	0.064148	-0.791477	-0.971744	1.2365	1.17713
MGP_C57BL6NJ_G0023272	-0.757417	0.068212	-0.723692	-0.994577	1.27717	1.1303
MGP_C57BL6NJ_G0028171	-0.734517	0.0157893	-0.697888	-1.01183	1.23315	1.19529
MGP_C57BL6NJ_G0018009	-0.743038	0.174011	-0.789174	-1.00327	1.17908	1.18239
MGP_C57BL6NJ_G0030090	-0.821182	0.1185	-0.713445	-0.973179	1.21861	1.17069
MGP_C57BL6NJ_G0030864	-0.737719	0.0785818	-0.896855	-0.855729	1.15699	1.25473
MGP_C57BL6NJ_G0026732	-0.728561	0.00611042	-0.83849	-0.882994	1.22412	1.21982
MGP_C57BL6NJ_G0028097	-0.749618	0.0495175	-0.887769	-0.83866	1.22085	1.20568
MGP_C57BL6NJ_G0018495	-0.84701	0.16739	-0.84701	-0.84701	1.15066	1.22298
MGP_C57BL6NJ_G0033031	-0.89625	0.0646708	-0.750656	-0.836665	1.16747	1.25143
MGP_C57BL6NJ_G0028628	-0.520296	0.0548673	-0.946365	-0.98099	1.14337	1.24942
MGP_C57BL6NJ_G0027191	-0.696261	0.0576977	-0.716891	-1.04704	1.11264	1.28985
MGP_C57BL6NJ_G0033844	-0.61919	-0.000209125	-0.700018	-1.0915	1.08516	1.32576
MGP_C57BL6NJ_G0019363	-0.666709	0.132235	-0.838088	-1.00278	1.12094	1.25441
MGP_C57BL6NJ_G0034065	-0.644085	0.0976599	-0.751391	-1.08386	1.18428	1.19739
MGP_C57BL6NJ_G0016781	-1.02438	-0.16238	-0.392882	-0.864318	1.08704	1.35692
MGP_C57BL6NJ_G0018896	-0.761861	-0.390752	-0.672738	-0.733819	1.30343	1.25574
MGP_C57BL6NJ_G0031270	-0.784159	-0.366016	-0.61713	-0.784159	1.26177	1.28969
MGP_C57BL6NJ_G0034832	-0.743345	-0.359699	-0.657236	-0.792422	1.27306	1.27964
MGP_C57BL6NJ_G0017545	-0.826425	-0.361496	-0.585956	-0.772977	1.23974	1.30711
MGP_C57BL6NJ_G0024572	-0.764038	-0.471981	-0.565175	-0.764038	1.27555	1.28968
MGP_C57BL6NJ_G0028376	-0.784457	-0.269034	-0.541439	-0.919584	1.33493	1.17958
MGP_C57BL6NJ_G0036239	-0.853277	-0.215446	-0.587719	-0.853277	1.29131	1.21841
MGP_C57BL6NJ_G0033352	-0.802795	-0.22887	-0.565632	-0.912352	1.22613	1.28352
MGP_C57BL6NJ_G0035267	-0.776715	-0.276475	-0.584954	-0.887651	1.27627	1.24953
MGP_C57BL6NJ_G0036553	-0.988245	-0.290136	-0.541604	-0.694764	1.23309	1.28166
MGP_C57BL6NJ_G0016899	-0.887553	-0.386709	-0.34928	-0.887553	1.24652	1.26458
MGP_C57BL6NJ_G0032979	-0.862684	-0.432137	-0.420079	-0.821704	1.27794	1.25866
MGP_C57BL6NJ_G0021381	-0.612606	-0.543772	-0.589619	-0.822446	1.22718	1.34126
MGP_C57BL6NJ_G0022136	-0.704	-0.468098	-0.574451	-0.802256	1.09628	1.45253
MGP_C57BL6NJ_G0027818	-0.672562	-0.51583	-0.616588	-0.759709	1.14925	1.41544
MGP_C57BL6NJ_G0023177	-0.666763	-0.465105	-0.637742	-0.795221	1.20881	1.35602
MGP_C57BL6NJ_G0028308	-0.688673	-0.426908	-0.610327	-0.830462	1.19512	1.36125
MGP_C57BL6NJ_G0028817	-0.734426	-0.432087	-0.603609	-0.789108	1.20197	1.35726
MGP_C57BL6NJ_G0017730	-0.736255	-0.52123	-0.555892	-0.754383	1.20822	1.35953
MGP_C57BL6NJ_G0034825	-0.76329	-0.454063	-0.563076	-0.776861	1.17671	1.38058
MGP_C57BL6NJ_G0027379	-0.566646	-0.451021	-0.711437	-0.820542	1.12364	1.42601
MGP_C57BL6NJ_G0018550	-0.635778	-0.415865	-0.743778	-0.743778	1.05435	1.48485
MGP_C57BL6NJ_G0021479	-0.635689	-0.37375	-0.723184	-0.80612	1.09504	1.4437
MGP_C57BL6NJ_G0035478	-0.677092	-0.380909	-0.717108	-0.765579	1.08521	1.45548
MGP_C57BL6NJ_G0021478	-0.719327	-0.402384	-0.719327	-0.719327	1.21671	1.34366
MGP_C57BL6NJ_G0030428	-0.684433	-0.434778	-0.710992	-0.735017	1.22523	1.33999
MGP_C57BL6NJ_G0022655	-0.754546	-0.414832	-0.722854	-0.667716	1.19768	1.36227
MGP_C57BL6NJ_G0028744	-0.744178	-0.395978	-0.673576	-0.741113	1.17057	1.38427
MGP_C57BL6NJ_G0019534	-0.651006	-0.349181	-0.772457	-0.772457	1.1674	1.3777
MGP_C57BL6NJ_G0022261	-0.665519	-0.365652	-0.745103	-0.770345	1.14654	1.40008
MGP_C57BL6NJ_G0033361	-0.685369	-0.357115	-0.733914	-0.769653	1.14943	1.39662
MGP_C57BL6NJ_G0031499	-0.731184	-0.39332	-0.731184	-0.695323	1.13633	1.41468
MGP_C57BL6NJ_G0020222	-0.695663	-0.398321	-0.790742	-0.667696	1.15606	1.39636
MGP_C57BL6NJ_G0027778	-0.704156	-0.353289	-0.783875	-0.702018	1.13424	1.4091
MGP_C57BL6NJ_G0022691	-0.853586	-0.2723	-0.695896	-0.709988	1.22139	1.31038
MGP_C57BL6NJ_G0016604	-0.846857	-0.27255	-0.610406	-0.794855	1.16964	1.35503
MGP_C57BL6NJ_G0032140	-0.815738	-0.256866	-0.672565	-0.782072	1.189	1.33824
MGP_C57BL6NJ_G0016798	-0.779062	-0.317314	-0.693347	-0.745174	1.11995	1.41494
MGP_C57BL6NJ_G0017498	-0.740173	-0.320197	-0.740173	-0.740173	1.15571	1.385
MGP_C57BL6NJ_G0021207	-0.737554	-0.336402	-0.737554	-0.737554	1.21969	1.32937
MGP_C57BL6NJ_G0022922	-0.738058	-0.334315	-0.738058	-0.738058	1.21658	1.3319
MGP_C57BL6NJ_G0035685	-0.765875	-0.278811	-0.758068	-0.733729	1.21438	1.3221
MGP_C57BL6NJ_G0028489	-0.757157	-0.258369	-0.757157	-0.757157	1.18326	1.34659
MGP_C57BL6NJ_G0030893	-0.74027	-0.283757	-0.756431	-0.756431	1.20059	1.3363
MGP_C57BL6NJ_G0016383	-0.761844	-0.24339	-0.60555	-0.887612	1.04327	1.45513
MGP_C57BL6NJ_G0017783	-0.801585	-0.185374	-0.546454	-0.952929	1.13033	1.35601
MGP_C57BL6NJ_G0023315	-0.757195	-0.270891	-0.546502	-0.934875	1.12841	1.38105
MGP_C57BL6NJ_G0020334	-0.878455	-0.280398	-0.57677	-0.779382	1.10426	1.41075
MGP_C57BL6NJ_G0032937	-0.834748	-0.367377	-0.614086	-0.727775	1.15899	1.385
MGP_C57BL6NJ_G0035381	-0.785287	-0.425556	-0.574809	-0.761187	1.11654	1.4303
MGP_C57BL6NJ_G0017134	-0.842984	-0.375452	-0.566988	-0.745025	1.07775	1.45269
MGP_C57BL6NJ_G0017722	-0.862045	-0.400086	-0.513677	-0.759057	1.11909	1.41577
MGP_C57BL6NJ_G0020923	-0.553621	-0.425292	-0.721363	-0.854124	1.2886	1.2658
MGP_C57BL6NJ_G0022050	-0.52349	-0.412799	-0.694784	-0.911207	1.34509	1.19719
MGP_C57BL6NJ_G0016528	-0.668026	-0.328263	-0.695995	-0.850772	1.22572	1.31733
MGP_C57BL6NJ_G0022066	-0.692858	-0.282119	-0.703937	-0.854925	1.22356	1.31028
MGP_C57BL6NJ_G0027648	-0.706386	-0.353948	-0.633229	-0.853328	1.23304	1.31385
MGP_C57BL6NJ_G0031615	-0.638846	-0.368613	-0.638647	-0.898521	1.23215	1.31248
MGP_C57BL6NJ_G0020040	-0.603827	-0.301831	-0.814697	-0.815465	1.2541	1.28172
MGP_C57BL6NJ_G0021409	-0.593179	-0.313969	-0.853373	-0.775467	1.22136	1.31463
MGP_C57BL6NJ_G0017043	-0.573899	-0.408405	-0.796417	-0.776031	1.23288	1.32187
MGP_C57BL6NJ_G0029932	-0.603785	-0.394079	-0.800401	-0.755228	1.20978	1.34372
MGP_C57BL6NJ_G0018171	-0.647442	-0.386541	-0.76124	-0.76124	1.22986	1.32661
MGP_C57BL6NJ_G0022693	-0.658133	-0.329047	-0.800564	-0.756974	1.2137	1.33102
MGP_C57BL6NJ_G0028826	-0.591095	-0.438825	-0.783917	-0.748567	1.29121	1.2712
MGP_C57BL6NJ_G0033583	-0.63887	-0.468597	-0.757381	-0.704641	1.26265	1.30684
MGP_C57BL6NJ_G0029730	-0.676372	-0.423732	-0.682256	-0.780935	1.31629	1.24701
MGP_C57BL6NJ_G0029969	-0.648602	-0.402888	-0.722785	-0.785706	1.29569	1.26429
MGP_C57BL6NJ_G0030873	-0.644968	-0.340033	-0.758461	-0.804463	1.27195	1.27598
MGP_C57BL6NJ_G0018441	-0.676923	-0.374385	-0.774687	-0.730502	1.27851	1.27799
MGP_C57BL6NJ_G0030068	-0.70326	-0.364235	-0.736184	-0.751845	1.28702	1.2685
MGP_C57BL6NJ_G0026976	-0.788491	-0.229561	-0.894657	-0.601177	1.30136	1.21253
MGP_C57BL6NJ_G0022088	-0.761511	-0.280269	-0.870258	-0.618454	1.2684	1.26209
MGP_C57BL6NJ_G0024226	-0.71434	-0.30765	-0.91489	-0.594325	1.23984	1.29137
MGP_C57BL6NJ_G0024437	-0.84735	-0.153632	-0.752123	-0.749121	1.22926	1.27297
MGP_C57BL6NJ_G0026807	-0.841992	-0.191843	-0.772107	-0.706666	1.28886	1.22375
MGP_C57BL6NJ_G0027666	-0.787902	-0.189025	-0.787902	-0.74897	1.2896	1.2242
MGP_C57BL6NJ_G0021446	-0.717142	-0.223721	-0.822148	-0.759835	1.26323	1.25962
MGP_C57BL6NJ_G0022109	-0.813452	-0.212528	-0.813452	-0.678734	1.24996	1.26821
MGP_C57BL6NJ_G0025119	-0.78252	-0.25832	-0.789274	-0.701071	1.22665	1.30453
MGP_C57BL6NJ_G0019831	-0.823453	-0.270752	-0.787845	-0.649309	1.30052	1.23084
MGP_C57BL6NJ_G0031424	-0.877096	-0.257963	-0.766224	-0.620975	1.33378	1.18848
MGP_C57BL6NJ_G0034089	-0.829637	-0.369818	-0.628564	-0.717184	1.38762	1.15759
MGP_C57BL6NJ_G0023275	-0.775231	-0.330828	-0.69292	-0.74439	1.37404	1.16933
MGP_C57BL6NJ_G0023368	-0.823162	-0.278887	-0.676607	-0.753735	1.34433	1.18806
MGP_C57BL6NJ_G0022846	-0.646809	-0.201437	-0.830903	-0.830903	1.32601	1.18405
MGP_C57BL6NJ_G0023307	-0.57101	-0.271499	-0.851093	-0.82574	1.36088	1.15847
MGP_C57BL6NJ_G0027680	-0.651992	-0.394903	-0.740755	-0.763083	1.40732	1.14341
MGP_C57BL6NJ_G0020933	-0.65904	-0.332942	-0.801253	-0.749845	1.3635	1.17958
MGP_C57BL6NJ_G0027463	-0.640311	-0.354862	-0.76493	-0.785636	1.37616	1.16958
MGP_C57BL6NJ_G0030878	-0.740044	-0.316159	-0.740044	-0.740044	1.41073	1.12557
MGP_C57BL6NJ_G0036211	-0.698388	-0.327033	-0.757737	-0.757737	1.39066	1.15024
MGP_C57BL6NJ_G0020223	-0.767164	-0.277711	-0.767164	-0.7097	1.4377	1.08404
MGP_C57BL6NJ_G0022014	-0.749357	-0.31093	-0.718658	-0.749357	1.44804	1.08026
MGP_C57BL6NJ_G0016927	-0.88706	-0.88706	-0.38781	-0.286103	0.909717	1.53831
MGP_C57BL6NJ_G0023159	-0.870795	-0.835721	-0.26154	-0.447108	0.784218	1.63095
MGP_C57BL6NJ_G0018657	-0.800327	-0.800327	-0.328846	-0.362397	0.492847	1.79905
MGP_C57BL6NJ_G0022714	-0.904042	-0.774865	-0.43134	-0.286663	0.728628	1.66828
MGP_C57BL6NJ_G0023075	-0.814878	-0.682435	-0.566349	-0.366215	0.73367	1.69621
MGP_C57BL6NJ_G0034916	-0.773924	-0.794063	-0.537898	-0.353794	0.823028	1.63665
MGP_C57BL6NJ_G0025424	-0.866886	-0.559796	-0.497783	-0.539651	0.807681	1.65644
MGP_C57BL6NJ_G0034464	-0.863	-0.521878	-0.629087	-0.410937	0.723482	1.70142
MGP_C57BL6NJ_G0022226	-0.660752	-0.472657	-0.614597	-0.618003	0.557966	1.80804
MGP_C57BL6NJ_G0024374	-0.628662	-0.628662	-0.535691	-0.628662	0.665341	1.75633
MGP_C57BL6NJ_G0016594	-0.605069	-0.605069	-0.605069	-0.605069	0.659366	1.76091
MGP_C57BL6NJ_G0035343	-0.609699	-0.609699	-0.609699	-0.609699	0.700161	1.73863
MGP_C57BL6NJ_G0020896	-0.571248	-0.571248	-0.571248	-0.571248	0.40625	1.87874
MGP_C57BL6NJ_G0019631	-0.572952	-0.572952	-0.572952	-0.572952	0.417648	1.87416
MGP_C57BL6NJ_G0031998	-0.574544	-0.574544	-0.574544	-0.574544	0.4284	1.86978
MGP_C57BL6NJ_G0027333	-0.640094	-0.640094	-0.640094	-0.399115	0.480824	1.83857
MGP_C57BL6NJ_G0019349	-0.613603	-0.613603	-0.613603	-0.517456	0.538038	1.82023
MGP_C57BL6NJ_G0020025	-0.601555	-0.601555	-0.601555	-0.515344	0.468052	1.85196
MGP_C57BL6NJ_G0031443	-0.52936	-0.897847	-0.7192	-0.256229	0.729929	1.67271
MGP_C57BL6NJ_G0017618	-0.652412	-0.653074	-0.716242	-0.263717	0.452188	1.83326
MGP_C57BL6NJ_G0027775	-0.71277	-0.71277	-0.71277	-0.144027	0.489016	1.79332
MGP_C57BL6NJ_G0024598	-0.72844	-0.72844	-0.640945	-0.224312	0.535984	1.78615
MGP_C57BL6NJ_G0033018	-0.692713	-0.692713	-0.692713	-0.259943	0.552777	1.7853
MGP_C57BL6NJ_G0017788	-0.671068	-0.680029	-0.866004	-0.0323595	0.489835	1.75963
MGP_C57BL6NJ_G0021527	-0.79601	-0.549196	-0.883936	-0.0654023	0.57865	1.71589
MGP_C57BL6NJ_G0025101	-0.825774	-0.609741	-0.818497	-0.00503801	0.52757	1.73148
MGP_C57BL6NJ_G0026591	-0.954068	-0.693546	-0.599356	-0.0677041	0.625322	1.68935
MGP_C57BL6NJ_G0035205	-0.898074	-0.717539	-0.564273	-0.174066	0.648132	1.70582
MGP_C57BL6NJ_G0029650	-0.794613	-0.661174	-0.794613	-0.130069	0.716	1.66447
MGP_C57BL6NJ_G0028010	-0.738736	-0.742357	-0.712533	-0.234898	0.771865	1.65666
MGP_C57BL6NJ_G0029319	-0.69909	-0.69909	-0.69909	-0.308186	0.680362	1.72509
MGP_C57BL6NJ_G0019587	-0.712293	-0.610856	-0.477879	-0.712293	0.920969	1.59235
MGP_C57BL6NJ_G0034748	-0.775587	-0.610232	-0.480075	-0.651749	0.941355	1.57629
MGP_C57BL6NJ_G0025383	-0.65135	-0.65135	-0.550727	-0.65135	0.873589	1.63119
MGP_C57BL6NJ_G0029014	-0.642759	-0.642759	-0.565277	-0.642759	0.839261	1.65429
MGP_C57BL6NJ_G0017015	-0.667301	-0.667301	-0.496311	-0.667301	0.863576	1.63464
MGP_C57BL6NJ_G0017733	-0.691152	-0.691152	-0.473327	-0.639608	0.861372	1.63387
MGP_C57BL6NJ_G0017826	-0.619299	-0.619299	-0.619299	-0.619299	0.792718	1.68448
MGP_C57BL6NJ_G0035377	-0.622898	-0.622898	-0.622898	-0.622898	0.831077	1.66051
MGP_C57BL6NJ_G0019095	-0.626183	-0.626183	-0.626183	-0.626183	0.86848	1.63625
MGP_C57BL6NJ_G0034765	-0.624668	-0.624668	-0.624668	-0.624668	0.850912	1.64776
MGP_C57BL6NJ_G0028906	-0.561244	-0.703513	-0.569366	-0.672067	0.883146	1.62304
MGP_C57BL6NJ_G0025197	-0.630495	-0.630495	-0.630495	-0.630495	0.922086	1.59989
MGP_C57BL6NJ_G0025754	-0.631117	-0.631117	-0.631117	-0.631117	0.930348	1.59412
MGP_C57BL6NJ_G0031322	-0.532632	-0.600111	-0.705129	-0.705129	1.0182	1.52481
MGP_C57BL6NJ_G0020462	-0.532106	-0.566637	-0.751861	-0.698705	1.05923	1.49008
MGP_C57BL6NJ_G0034156	-0.530904	-0.563323	-0.725481	-0.725481	1.03896	1.50623
MGP_C57BL6NJ_G0019776	-0.665337	-0.632369	-0.712491	-0.527185	0.992362	1.54502
MGP_C57BL6NJ_G0036658	-0.694523	-0.590274	-0.694523	-0.557437	0.986818	1.54994
MGP_C57BL6NJ_G0024317	-0.640954	-0.640954	-0.640954	-0.640954	1.09464	1.46917
MGP_C57BL6NJ_G0027504	-0.640391	-0.640391	-0.640391	-0.640391	1.0823	1.47926
MGP_C57BL6NJ_G0031752	-0.64057	-0.64057	-0.64057	-0.64057	1.08615	1.47613
MGP_C57BL6NJ_G0019394	-0.640197	-0.640197	-0.640197	-0.640197	1.07819	1.4826
MGP_C57BL6NJ_G0027338	-0.639999	-0.639999	-0.639999	-0.639999	1.07407	1.48593
MGP_C57BL6NJ_G0018597	-0.661569	-0.617805	-0.619898	-0.661569	1.08074	1.4801
MGP_C57BL6NJ_G0035441	-0.653795	-0.598275	-0.653795	-0.653795	1.07514	1.48452
MGP_C57BL6NJ_G0034757	-0.636769	-0.636769	-0.636769	-0.636769	1.0144	1.53268
MGP_C57BL6NJ_G0028829	-0.641911	-0.641911	-0.641911	-0.625668	1.03325	1.51815
MGP_C57BL6NJ_G0031960	-0.637938	-0.637938	-0.637938	-0.637938	1.03461	1.51714
MGP_C57BL6NJ_G0023356	-0.649336	-0.649336	-0.649336	-0.598278	1.01298	1.5333
MGP_C57BL6NJ_G0030623	-0.658463	-0.658463	-0.658463	-0.577277	1.04397	1.50869
MGP_C57BL6NJ_G0018204	-0.693807	-0.52888	-0.652175	-0.674338	1.04046	1.50874
MGP_C57BL6NJ_G0027243	-0.675954	-0.512625	-0.675954	-0.675954	1.0062	1.53429
MGP_C57BL6NJ_G0029705	-0.673854	-0.516523	-0.673854	-0.673854	0.995156	1.54293
MGP_C57BL6NJ_G0022909	-0.667099	-0.561665	-0.667099	-0.667099	1.1011	1.46187
MGP_C57BL6NJ_G0030581	-0.693297	-0.551511	-0.625143	-0.693297	1.11047	1.45278
MGP_C57BL6NJ_G0018113	-0.746354	-0.532351	-0.608925	-0.660874	1.04558	1.50292
MGP_C57BL6NJ_G0028217	-0.716599	-0.516631	-0.605143	-0.716599	1.08264	1.47233
MGP_C57BL6NJ_G0019369	-0.742628	-0.489416	-0.635621	-0.643405	0.910383	1.60069
MGP_C57BL6NJ_G0031627	-0.721549	-0.443672	-0.692556	-0.661477	0.949773	1.56948
MGP_C57BL6NJ_G0023385	-0.740884	-0.428335	-0.624488	-0.740884	1.02579	1.5088
MGP_C57BL6NJ_G0028394	-0.74349	-0.444218	-0.583279	-0.74349	0.944502	1.56997
MGP_C57BL6NJ_G0034445	-0.309811	-0.6589	-0.794894	-0.754064	1.03515	1.48252
MGP_C57BL6NJ_G0023573	-0.392621	-0.67302	-0.754266	-0.69994	0.977746	1.5421
MGP_C57BL6NJ_G0034967	-0.329877	-0.743362	-0.743362	-0.699851	1.00332	1.51313
MGP_C57BL6NJ_G0022463	-0.683679	-0.683679	-0.683679	-0.502757	1.0719	1.4819
MGP_C57BL6NJ_G0026921	-0.686821	-0.686821	-0.686821	-0.492545	1.07241	1.48059
MGP_C57BL6NJ_G0029547	-0.675661	-0.675661	-0.675661	-0.538552	1.12558	1.43996
MGP_C57BL6NJ_G0034203	-0.669015	-0.669015	-0.669015	-0.552222	1.08293	1.47634
MGP_C57BL6NJ_G0020558	-0.771602	-0.685152	-0.646573	-0.444173	1.08013	1.46737
MGP_C57BL6NJ_G0021142	-0.732583	-0.732583	-0.584216	-0.49795	1.05811	1.48922
MGP_C57BL6NJ_G0031622	-0.586876	-0.751685	-0.825992	-0.355156	1.02782	1.49189
MGP_C57BL6NJ_G0021716	-0.566502	-0.760454	-0.672241	-0.540037	1.01137	1.52786
MGP_C57BL6NJ_G0029873	-0.691962	-0.691962	-0.691962	-0.429251	0.905112	1.60003
MGP_C57BL6NJ_G0021686	-0.60725	-0.642358	-0.767443	-0.510069	0.966645	1.56048
MGP_C57BL6NJ_G0029466	-0.585842	-0.747686	-0.747686	-0.437306	0.962602	1.55592
MGP_C57BL6NJ_G0021368	-0.763093	-0.39413	-0.832069	-0.538873	1.05937	1.4688
MGP_C57BL6NJ_G0022881	-0.872364	-0.355451	-0.764948	-0.533394	1.10146	1.4247
MGP_C57BL6NJ_G0032681	-0.803982	-0.258356	-0.892209	-0.543648	1.05572	1.44247
MGP_C57BL6NJ_G0019730	-0.838344	-0.181358	-0.838344	-0.636042	1.09426	1.39982
MGP_C57BL6NJ_G0021550	-0.90683	-0.189584	-0.798393	-0.589063	1.05156	1.43231
MGP_C57BL6NJ_G0029407	-0.932375	-0.18619	-0.820931	-0.539687	1.06982	1.40937
MGP_C57BL6NJ_G0027890	-0.768559	-0.345559	-0.707969	-0.685385	0.957741	1.54973
MGP_C57BL6NJ_G0024484	-0.738184	-0.294903	-0.738184	-0.725316	0.947757	1.54883
MGP_C57BL6NJ_G0024643	-0.746453	-0.299541	-0.746453	-0.719425	1.00737	1.5045
MGP_C57BL6NJ_G0020201	-0.703273	-0.305396	-0.829006	-0.690276	1.10097	1.42698
MGP_C57BL6NJ_G0021162	-0.720759	-0.261738	-0.751269	-0.791774	1.13724	1.3883
MGP_C57BL6NJ_G0016900	-0.723118	-0.20541	-0.82043	-0.755498	1.08659	1.41787
MGP_C57BL6NJ_G0035414	-0.691724	-0.252223	-0.826215	-0.750409	1.12702	1.39355
MGP_C57BL6NJ_G0019544	-0.930529	-0.215308	-0.761151	-0.505239	0.791552	1.62067
MGP_C57BL6NJ_G0024878	-0.79875	-0.255386	-0.803937	-0.609485	0.891309	1.57625
MGP_C57BL6NJ_G0029269	-0.818305	-0.179533	-0.818305	-0.631405	0.881275	1.56627
MGP_C57BL6NJ_G0019676	-0.831026	-0.32102	-0.564239	-0.766591	0.911303	1.57157
MGP_C57BL6NJ_G0022839	-0.710107	-0.341341	-0.710107	-0.710107	0.838226	1.63344
MGP_C57BL6NJ_G0028908	-0.725543	-0.446212	-0.572792	-0.725543	0.805334	1.66476
MGP_C57BL6NJ_G0017853	-0.947326	-0.430609	-0.578708	-0.565169	1.05711	1.4647
MGP_C57BL6NJ_G0031019	-1.00182	-0.393145	-0.579324	-0.536135	1.07134	1.43908
MGP_C57BL6NJ_G0020286	-0.866682	-0.532636	-0.648415	-0.47955	1.0175	1.50978
MGP_C57BL6NJ_G0032845	-0.878262	-0.483543	-0.557177	-0.611389	1.03151	1.49886
MGP_C57BL6NJ_G0033061	-0.861923	-0.474455	-0.598465	-0.607966	1.08265	1.46016
MGP_C57BL6NJ_G0034453	-1.06775	-0.525774	-0.456865	-0.404027	0.911429	1.54299
MGP_C57BL6NJ_G0021774	-1.02812	-0.346062	-0.670818	-0.400423	0.888907	1.55651
MGP_C57BL6NJ_G0022884	-0.964159	-0.511594	-0.629034	-0.371877	0.916027	1.56064
MGP_C57BL6NJ_G0024977	-0.98235	-0.374191	-0.847344	-0.189267	0.824038	1.56911
MGP_C57BL6NJ_G0030344	-0.83844	-0.431119	-0.800531	-0.410507	0.904807	1.57579
MGP_C57BL6NJ_G0034337	-0.893502	-0.327491	-0.837252	-0.407108	0.925521	1.53983
MGP_C57BL6NJ_G0034845	-0.722543	-0.544608	-0.802104	-0.447312	0.965606	1.55096
MGP_C57BL6NJ_G0023903	-0.792043	-0.577489	-0.739992	-0.376821	0.883563	1.60278
MGP_C57BL6NJ_G0032693	-0.767237	-0.556105	-0.767237	-0.406559	0.90923	1.58791
MGP_C57BL6NJ_G0031753	-0.601526	-0.53943	-0.821231	-0.511024	0.816353	1.65686
MGP_C57BL6NJ_G0024599	-0.735514	-0.577799	-0.816989	-0.300454	0.760882	1.66988
MGP_C57BL6NJ_G0027253	-0.777994	-0.527634	-0.777994	-0.370498	0.801367	1.65275
MGP_C57BL6NJ_G0024053	-0.798403	-0.370719	-0.798403	-0.416966	0.657965	1.72653
MGP_C57BL6NJ_G0036003	-0.702146	-0.431118	-0.826826	-0.459302	0.709796	1.7096
MGP_C57BL6NJ_G0031383	-0.685233	-0.509138	-0.685233	-0.595867	0.800323	1.67515
MGP_C57BL6NJ_G0019545	-0.774566	-0.395018	-0.747841	-0.546273	0.812671	1.65103
MGP_C57BL6NJ_G0033993	-0.723652	-0.369237	-0.723652	-0.632425	0.767516	1.68145
MGP_C57BL6NJ_G0026020	-0.94038	-0.170743	-0.94038	-0.411237	1.21462	1.24812
MGP_C57BL6NJ_G0030326	-0.870496	-0.255807	-0.996365	-0.327391	1.03077	1.41929
MGP_C57BL6NJ_G0022428	-0.984649	-0.331742	-0.907799	-0.231935	1.1135	1.34262
MGP_C57BL6NJ_G0029573	-0.926984	-0.325441	-0.909034	-0.316996	1.10397	1.37448
MGP_C57BL6NJ_G0027315	-0.974007	-0.388814	-0.788146	-0.324446	1.00333	1.47208
MGP_C57BL6NJ_G0033834	-0.989727	-0.406067	-0.766175	-0.336095	1.11598	1.38208
MGP_C57BL6NJ_G0035401	-0.848934	-0.549924	-0.848934	-0.268457	1.16225	1.354
MGP_C57BL6NJ_G0018703	-0.772051	-0.449483	-0.939134	-0.347438	1.08986	1.41825
MGP_C57BL6NJ_G0030960	-0.868882	-0.47397	-0.865267	-0.27738	1.01262	1.47288
MGP_C57BL6NJ_G0024685	-0.837839	0.0675164	-1.18164	-0.389902	1.13215	1.20972
MGP_C57BL6NJ_G0028696	-0.715602	-0.062125	-1.23876	-0.358628	1.17452	1.2006
MGP_C57BL6NJ_G0035573	-0.90979	-0.0799741	-1.14372	-0.232091	1.12831	1.23727
MGP_C57BL6NJ_G0019208	-0.811828	-0.115128	-1.27207	-0.122148	1.17924	1.14193
MGP_C57BL6NJ_G0035571	-0.762825	-0.221142	-1.23794	-0.150412	1.19449	1.17783
MGP_C57BL6NJ_G0031625	-0.466785	-0.364837	-1.16792	-0.467518	1.34122	1.12584
MGP_C57BL6NJ_G0020350	-0.836335	-0.396362	-1.04778	-0.171592	1.2962	1.15587
MGP_C57BL6NJ_G0028725	-0.742683	-0.297929	-1.14335	-0.253426	1.31294	1.12445
MGP_C57BL6NJ_G0018445	-0.789422	-0.414433	-0.983575	-0.317305	1.24499	1.25974
MGP_C57BL6NJ_G0019334	-0.66573	-0.436418	-1.1248	-0.235413	1.14705	1.3153
MGP_C57BL6NJ_G0019565	-1.11792	0.00663682	-0.65131	-0.643015	1.10515	1.30046
MGP_C57BL6NJ_G0028912	-1.23091	-0.0836193	-0.652212	-0.40479	0.990092	1.38143
MGP_C57BL6NJ_G0021929	-1.27767	-0.291618	-0.445334	-0.373022	1.41135	0.976296
MGP_C57BL6NJ_G0026304	-1.09227	-0.46548	-0.574588	-0.366336	1.29522	1.20346
MGP_C57BL6NJ_G0023184	-1.41223	-0.275499	-0.68419	0.168048	1.15097	1.05291
MGP_C57BL6NJ_G0017125	-1.25492	-0.534649	-0.667461	0.145545	1.1799	1.13158
MGP_C57BL6NJ_G0020585	-1.20578	-0.472995	-0.728615	0.0799222	1.35935	0.968119
MGP_C57BL6NJ_G0018120	-0.946268	-0.214675	-1.15756	0.049484	1.40083	0.868194
MGP_C57BL6NJ_G0025779	-0.889854	-0.44657	-0.860194	-0.314028	1.35155	1.1591
MGP_C57BL6NJ_G0016356	-0.950107	-0.372725	-0.861079	-0.300061	1.38659	1.09738
MGP_C57BL6NJ_G0016603	-0.92402	-0.376089	-0.92402	-0.240058	1.4012	1.06298
MGP_C57BL6NJ_G0030203	-1.04688	-0.114133	-1.04688	-0.139191	1.27672	1.07036
MGP_C57BL6NJ_G0030519	-1.13301	-0.187536	-0.848417	-0.240441	1.22572	1.18368
MGP_C57BL6NJ_G0029700	-0.672829	-1.14674	-0.483732	-0.136742	1.25667	1.18338
MGP_C57BL6NJ_G0034199	-0.929593	-1.11968	-0.0372498	-0.270528	1.05654	1.30051
MGP_C57BL6NJ_G0031692	-0.951191	-0.673117	-0.627378	-0.218695	0.96194	1.50844
MGP_C57BL6NJ_G0035550	-0.920003	-0.625466	-0.735171	-0.184121	0.958073	1.50669
MGP_C57BL6NJ_G0021519	-0.784454	-0.784454	-0.784454	-0.0727502	0.892437	1.53368
MGP_C57BL6NJ_G0030411	-0.752354	-0.752354	-0.752354	-0.20752	0.89932	1.56526
MGP_C57BL6NJ_G0022183	-0.936522	-0.876164	-0.563649	-0.0657865	1.06097	1.38115
MGP_C57BL6NJ_G0032165	-0.858591	-0.858591	-0.645393	-0.104067	1.06582	1.40083
MGP_C57BL6NJ_G0034639	-1.06139	-0.678473	-0.703042	0.0544827	1.01589	1.37253
MGP_C57BL6NJ_G0019453	-0.814343	-0.814343	-0.814343	0.0218304	1.01191	1.40929
MGP_C57BL6NJ_G0019155	-0.89102	-0.71846	-0.811176	-0.0355387	1.14387	1.31232
MGP_C57BL6NJ_G0024676	-0.910662	-0.781116	-0.787173	0.0651702	1.0985	1.31528
MGP_C57BL6NJ_G0017637	-0.649191	-0.720943	-0.840447	-0.327606	1.37845	1.15973
MGP_C57BL6NJ_G0035425	-0.689543	-0.720052	-0.81651	-0.295048	1.4532	1.06796
MGP_C57BL6NJ_G0017540	-0.702598	-0.75915	-0.90555	-0.114196	1.33582	1.14567
MGP_C57BL6NJ_G0028451	-0.756413	-0.756413	-0.756413	-0.260755	1.35187	1.17812
MGP_C57BL6NJ_G0027701	-0.772794	-0.772794	-0.772794	-0.188439	1.37747	1.12935
MGP_C57BL6NJ_G0028275	-0.769642	-0.824649	-0.715508	-0.195236	1.39382	1.11121
MGP_C57BL6NJ_G0020646	-0.823211	-0.823211	-0.458615	-0.440161	1.30057	1.24463
MGP_C57BL6NJ_G0018285	-0.671136	-0.804851	-0.804851	-0.245832	1.23558	1.29109
MGP_C57BL6NJ_G0019603	-0.554441	-0.784634	-0.709939	-0.519073	1.22945	1.33864
MGP_C57BL6NJ_G0024440	-0.671297	-0.785503	-0.670609	-0.429157	1.15492	1.40165
MGP_C57BL6NJ_G0020631	-0.625381	-0.625381	-0.625381	-0.625381	1.64242	0.859104
MGP_C57BL6NJ_G0030086	-0.624134	-0.624134	-0.624134	-0.624134	1.65168	0.844852
MGP_C57BL6NJ_G0036524	-0.624369	-0.624369	-0.624369	-0.624369	1.64996	0.84752
MGP_C57BL6NJ_G0022138	-0.627989	-0.627989	-0.627989	-0.607472	1.66059	0.830847
MGP_C57BL6NJ_G0026158	-0.622014	-0.622014	-0.622014	-0.622014	1.66663	0.821425
MGP_C57BL6NJ_G0030155	-0.641216	-0.641216	-0.553299	-0.641216	1.68162	0.79533
MGP_C57BL6NJ_G0026198	-0.616328	-0.616328	-0.616328	-0.616328	1.70259	0.76272
MGP_C57BL6NJ_G0026658	-0.616774	-0.616774	-0.616774	-0.616774	1.69996	0.767135
MGP_C57BL6NJ_G0022427	-0.620607	-0.620607	-0.620607	-0.620607	1.67605	0.806377
MGP_C57BL6NJ_G0023492	-0.619402	-0.619402	-0.619402	-0.619402	1.68383	0.793778
MGP_C57BL6NJ_G0034997	-0.619719	-0.619719	-0.619719	-0.619719	1.6818	0.797074
MGP_C57BL6NJ_G0018183	-0.664325	-0.478323	-0.664325	-0.664325	1.67925	0.792046
MGP_C57BL6NJ_G0022843	-0.665712	-0.475311	-0.665712	-0.665712	1.67672	0.79573
MGP_C57BL6NJ_G0021907	-0.665452	-0.511441	-0.665452	-0.665452	1.61819	0.889604
MGP_C57BL6NJ_G0024096	-0.664153	-0.524989	-0.664153	-0.664153	1.59955	0.9179
MGP_C57BL6NJ_G0019172	-0.699669	-0.699669	-0.699669	-0.427049	1.54458	0.981476
MGP_C57BL6NJ_G0021376	-0.639305	-0.639305	-0.639305	-0.639305	1.4971	1.06012
MGP_C57BL6NJ_G0025488	-0.638324	-0.638324	-0.638324	-0.638324	1.51171	1.04159
MGP_C57BL6NJ_G0029707	-0.638477	-0.638477	-0.638477	-0.638477	1.50951	1.0444
MGP_C57BL6NJ_G0024397	-0.640385	-0.640385	-0.640385	-0.640385	1.47938	1.08216
MGP_C57BL6NJ_G0017512	-0.641292	-0.641292	-0.641292	-0.641292	1.46276	1.10241
MGP_C57BL6NJ_G0027795	-0.641265	-0.641265	-0.641265	-0.641265	1.46329	1.10178
MGP_C57BL6NJ_G0032059	-0.67362	-0.600337	-0.569329	-0.67362	1.60524	0.911668
MGP_C57BL6NJ_G0024046	-0.630794	-0.630794	-0.630794	-0.630794	1.59713	0.926043
MGP_C57BL6NJ_G0035621	-0.642944	-0.642944	-0.642944	-0.600286	1.58182	0.947297
MGP_C57BL6NJ_G0023124	-0.792128	-0.324434	-0.792128	-0.570534	1.58676	0.892461
MGP_C57BL6NJ_G0031084	-0.744853	-0.434979	-0.744853	-0.570525	1.60999	0.885219
MGP_C57BL6NJ_G0028329	-0.826382	-0.508627	-0.715439	-0.4876	1.47872	1.05933
MGP_C57BL6NJ_G0029735	-0.869054	-0.428125	-0.793947	-0.435748	1.41945	1.10743
MGP_C57BL6NJ_G0024762	-0.539809	-0.492582	-0.811475	-0.700667	1.47129	1.07324
MGP_C57BL6NJ_G0036552	-0.559881	-0.367159	-0.923496	-0.675047	1.42697	1.09861
MGP_C57BL6NJ_G0031528	-0.686155	-0.52495	-0.659672	-0.686155	1.47682	1.08011
MGP_C57BL6NJ_G0034980	-0.677531	-0.530523	-0.677531	-0.677531	1.44981	1.11331
MGP_C57BL6NJ_G0020030	-0.629667	-0.456709	-0.735615	-0.726115	1.47423	1.07387
MGP_C57BL6NJ_G0016382	-0.67752	-0.442147	-0.681838	-0.753815	1.43177	1.12355
MGP_C57BL6NJ_G0021881	-0.694136	-0.476809	-0.694136	-0.694136	1.44145	1.11776
MGP_C57BL6NJ_G0021240	-0.693246	-0.512508	-0.693246	-0.643737	1.52534	1.0174
MGP_C57BL6NJ_G0028407	-0.676542	-0.564094	-0.676542	-0.62659	1.53493	1.00883
MGP_C57BL6NJ_G0016253	-0.63933	-0.440925	-0.724039	-0.724039	1.53997	0.98836
MGP_C57BL6NJ_G0031011	-0.686942	-0.467215	-0.686942	-0.686942	1.55604	0.972003
MGP_C57BL6NJ_G0020921	-0.702	-0.421695	-0.702	-0.702	1.53692	0.990779
MGP_C57BL6NJ_G0026661	-0.6978	-0.440288	-0.6978	-0.6978	1.52722	1.00647
MGP_C57BL6NJ_G0035641	-0.572739	-0.888135	-0.451503	-0.626631	1.09148	1.44753
MGP_C57BL6NJ_G0022813	-0.832689	-0.781588	-0.300891	-0.587088	0.996273	1.50598
MGP_C57BL6NJ_G0031182	-0.759602	-0.693787	-0.309125	-0.759602	1.05061	1.47151
MGP_C57BL6NJ_G0036715	-0.706754	-0.706754	-0.425646	-0.706754	1.07358	1.47233
MGP_C57BL6NJ_G0031664	-0.734373	-0.734373	-0.315454	-0.734373	1.49484	1.02373
MGP_C57BL6NJ_G0022713	-0.826863	-0.568429	-0.378851	-0.773436	1.21732	1.33026
MGP_C57BL6NJ_G0023100	-0.738241	-0.690111	-0.39339	-0.738241	1.24657	1.31341
MGP_C57BL6NJ_G0027774	-0.760308	-0.652733	-0.384055	-0.760308	1.28743	1.26997
MGP_C57BL6NJ_G0024812	-0.505905	-0.72214	-0.536969	-0.798068	1.36101	1.20207
MGP_C57BL6NJ_G0033571	-0.554386	-0.734199	-0.513556	-0.766187	1.23584	1.33249
MGP_C57BL6NJ_G0022314	-0.497598	-0.606507	-0.69417	-0.764346	1.14915	1.41347
MGP_C57BL6NJ_G0022265	-0.504901	-0.5432	-0.769496	-0.749229	1.24993	1.3169
MGP_C57BL6NJ_G0028249	-0.450557	-0.631594	-0.802987	-0.67657	1.19606	1.36565
MGP_C57BL6NJ_G0026727	-0.555371	-0.542782	-0.739735	-0.732705	1.35205	1.21854
MGP_C57BL6NJ_G0024540	-0.444042	-0.707802	-0.707802	-0.707802	1.32831	1.23914
MGP_C57BL6NJ_G0027466	-0.515712	-0.686729	-0.686729	-0.686729	1.25945	1.31644
MGP_C57BL6NJ_G0022667	-0.520738	-0.596523	-0.901337	-0.535529	1.35455	1.19957
MGP_C57BL6NJ_G0026664	-0.498817	-0.696128	-0.877393	-0.47974	1.2051	1.34698
MGP_C57BL6NJ_G0018181	-0.327572	-0.889172	-0.784973	-0.528538	1.31729	1.21297
MGP_C57BL6NJ_G0028121	-0.398579	-0.867783	-0.71035	-0.564576	1.40419	1.1371
MGP_C57BL6NJ_G0019982	-0.579446	-0.794427	-0.762088	-0.419232	1.35535	1.19984
MGP_C57BL6NJ_G0024744	-0.594315	-0.803768	-0.613884	-0.549814	1.42273	1.13905
MGP_C57BL6NJ_G0022230	-0.728337	-0.728337	-0.541472	-0.575159	1.33195	1.24136
MGP_C57BL6NJ_G0023129	-0.671548	-0.671548	-0.565122	-0.671548	1.29717	1.28259
MGP_C57BL6NJ_G0031177	-0.656648	-0.656648	-0.656648	-0.611634	1.29669	1.28489
MGP_C57BL6NJ_G0034430	-0.645363	-0.645363	-0.645363	-0.645363	1.32296	1.2585
MGP_C57BL6NJ_G0018442	-0.749545	-0.670818	-0.674583	-0.476464	1.28144	1.28997
MGP_C57BL6NJ_G0019378	-0.707738	-0.707738	-0.707738	-0.442866	1.34939	1.21669
MGP_C57BL6NJ_G0020488	-0.701605	-0.701605	-0.701605	-0.465632	1.32292	1.24753
MGP_C57BL6NJ_G0033049	-0.83833	-0.518627	-0.644384	-0.564737	1.31213	1.25395
MGP_C57BL6NJ_G0027105	-0.741791	-0.530119	-0.741791	-0.553058	1.37946	1.1873
MGP_C57BL6NJ_G0034072	-0.753704	-0.611391	-0.679122	-0.52059	1.41804	1.14677
MGP_C57BL6NJ_G0025452	-0.896785	-0.513325	-0.504448	-0.630318	1.41789	1.12699
MGP_C57BL6NJ_G0028969	-0.664407	-0.664407	-0.575499	-0.664407	1.43491	1.1338
MGP_C57BL6NJ_G0017734	-0.644303	-0.644303	-0.644303	-0.644303	1.38475	1.19246
MGP_C57BL6NJ_G0029221	-0.644248	-0.644248	-0.644248	-0.644248	1.38681	1.19018
MGP_C57BL6NJ_G0021354	-0.642532	-0.642532	-0.642532	-0.642532	1.43643	1.1337
MGP_C57BL6NJ_G0028399	-0.643014	-0.643014	-0.643014	-0.643014	1.42457	1.14748
MGP_C57BL6NJ_G0017387	-0.639992	-0.5748	-0.583421	-0.765295	1.43695	1.12655
MGP_C57BL6NJ_G0016996	-0.714608	-0.58483	-0.590872	-0.685241	1.36488	1.21067
MGP_C57BL6NJ_G0031919	-0.628462	-0.611995	-0.60506	-0.73214	1.34457	1.23308
MGP_C57BL6NJ_G0026194	-0.730624	-0.461604	-0.649132	-0.722849	1.38612	1.17809
MGP_C57BL6NJ_G0034136	-0.693216	-0.487837	-0.693216	-0.693216	1.39415	1.17333
MGP_C57BL6NJ_G0020490	-0.691632	-0.494466	-0.728454	-0.659121	1.29599	1.27768
MGP_C57BL6NJ_G0026244	-0.706392	-0.449252	-0.706392	-0.706392	1.32158	1.24685
MGP_C57BL6NJ_G0028351	-0.67596	-0.524878	-0.662605	-0.713272	1.28341	1.29331
MGP_C57BL6NJ_G0025446	-0.66881	-0.572927	-0.66881	-0.66881	1.33023	1.24912
MGP_C57BL6NJ_G0030144	-0.668487	-0.571703	-0.650829	-0.688646	1.31361	1.26606
MGP_C57BL6NJ_G0027695	-0.82531	-0.618524	-0.591882	-0.527873	1.17855	1.38504
MGP_C57BL6NJ_G0031307	-0.803153	-0.554577	-0.59145	-0.618259	1.18509	1.38235
MGP_C57BL6NJ_G0022505	-0.698087	-0.698087	-0.632564	-0.548528	1.24879	1.32848
MGP_C57BL6NJ_G0035256	-0.673793	-0.673793	-0.673793	-0.555905	1.22628	1.351
MGP_C57BL6NJ_G0036117	-0.644933	-0.644933	-0.644933	-0.644933	1.22378	1.35596
MGP_C57BL6NJ_G0027609	-0.644477	-0.644477	-0.644477	-0.644477	1.20011	1.3778
MGP_C57BL6NJ_G0020647	-0.644644	-0.644644	-0.644644	-0.644644	1.208	1.37057
MGP_C57BL6NJ_G0024392	-0.644655	-0.644655	-0.644655	-0.644655	1.20856	1.37006
MGP_C57BL6NJ_G0025561	-0.658217	-0.605392	-0.658217	-0.658217	1.23786	1.34218
MGP_C57BL6NJ_G0030208	-0.645271	-0.645271	-0.645271	-0.645271	1.24869	1.33239
MGP_C57BL6NJ_G0024442	-0.645357	-0.645357	-0.645357	-0.645357	1.25779	1.32364
MGP_C57BL6NJ_G0017503	-0.645401	-0.645401	-0.645401	-0.645401	1.26348	1.31813
MGP_C57BL6NJ_G0029937	-0.645391	-0.645391	-0.645391	-0.645391	1.26215	1.31942
MGP_C57BL6NJ_G0034537	-0.65943	-0.65943	-0.65943	-0.594962	1.1628	1.41045
MGP_C57BL6NJ_G0027768	-0.63261	-0.592987	-0.67387	-0.67387	1.16637	1.40697
MGP_C57BL6NJ_G0033958	-0.649883	-0.622187	-0.649883	-0.649883	1.14687	1.42497
MGP_C57BL6NJ_G0020499	-0.683981	-0.553031	-0.65457	-0.683981	1.20633	1.36923
MGP_C57BL6NJ_G0021557	-0.674659	-0.553889	-0.674659	-0.674659	1.23887	1.339
MGP_C57BL6NJ_G0031183	-0.680519	-0.534933	-0.680519	-0.680519	1.2364	1.34009
MGP_C57BL6NJ_G0027679	-0.679276	-0.533111	-0.679276	-0.679276	1.16996	1.40098
MGP_C57BL6NJ_G0029725	-0.698778	-0.517142	-0.732195	-0.621112	1.17991	1.38931
MGP_C57BL6NJ_G0032013	-0.741116	-0.515909	-0.828166	-0.470557	1.20245	1.3533
MGP_C57BL6NJ_G0018866	-0.747548	-0.613559	-0.747548	-0.458455	1.26505	1.30206
MGP_C57BL6NJ_G0036654	-0.729207	-0.61282	-0.797871	-0.42081	1.26587	1.29484
MGP_C57BL6NJ_G0024531	-0.840204	-0.475103	-0.790841	-0.441421	1.31252	1.23505
MGP_C57BL6NJ_G0024768	-0.863219	-0.382875	-0.782338	-0.513885	1.25631	1.286
MGP_C57BL6NJ_G0029724	-0.836456	-0.369923	-0.836456	-0.494299	1.24643	1.2907
MGP_C57BL6NJ_G0030780	-0.862933	-0.862933	-0.732576	0.219327	1.57733	0.661789
MGP_C57BL6NJ_G0026644	-1.17132	-0.370033	-0.686759	-0.0171807	1.62188	0.623416
MGP_C57BL6NJ_G0021344	-1.00181	-0.580877	-0.880967	0.132782	1.43814	0.892735
MGP_C57BL6NJ_G0021247	-0.957925	-0.528987	-0.823346	-0.0830446	1.55289	0.840415
MGP_C57BL6NJ_G0016997	-0.92995	-0.601274	-0.821717	-0.0901122	1.45182	0.991239
MGP_C57BL6NJ_G0018462	-1.01231	-0.592936	-0.730755	-0.108099	1.43553	1.00857
MGP_C57BL6NJ_G0018826	-0.757492	-0.757492	-0.757492	0.230482	1.77619	0.265806
MGP_C57BL6NJ_G0035761	-0.713363	-0.585012	-0.713363	-0.010702	1.90418	0.118264
MGP_C57BL6NJ_G0035456	-0.330377	-1.04561	-0.712859	-0.208769	1.69939	0.598228
MGP_C57BL6NJ_G0017978	-0.638022	-0.638022	-0.638022	-0.411302	1.83572	0.48965
MGP_C57BL6NJ_G0036554	-0.63217	-0.63217	-0.63217	-0.405359	1.8536	0.448275
MGP_C57BL6NJ_G0019635	-0.578766	-0.578766	-0.578766	-0.578766	1.85766	0.457406
MGP_C57BL6NJ_G0034866	-0.587079	-0.587079	-0.587079	-0.587079	1.83145	0.516868
MGP_C57BL6NJ_G0022658	-0.583559	-0.583559	-0.583559	-0.583559	1.84295	0.491286
MGP_C57BL6NJ_G0026208	-0.582463	-0.582463	-0.582463	-0.582463	1.84641	0.483443
MGP_C57BL6NJ_G0020047	-0.718124	-0.574762	-0.718124	-0.409725	1.73017	0.690566
MGP_C57BL6NJ_G0023993	-0.616489	-0.616489	-0.616489	-0.579945	1.74971	0.6797
MGP_C57BL6NJ_G0029728	-0.608064	-0.608064	-0.608064	-0.608064	1.74674	0.685512
MGP_C57BL6NJ_G0021571	-0.621064	-0.621064	-0.621064	-0.530536	1.78695	0.606779
MGP_C57BL6NJ_G0024909	-0.6029	-0.6029	-0.6029	-0.6029	1.77066	0.640936
MGP_C57BL6NJ_G0028336	-0.599229	-0.599229	-0.599229	-0.599229	1.78629	0.610625
MGP_C57BL6NJ_G0031983	-0.597568	-0.597568	-0.597568	-0.597568	1.79303	0.597243
MGP_C57BL6NJ_G0024628	-1.20491	-0.0466777	-1.20491	0.70459	0.698242	1.05367
MGP_C57BL6NJ_G0024847	-1.20817	-0.203019	-1.11727	0.562143	0.954564	1.01175
MGP_C57BL6NJ_G0023517	-1.1069	-0.336982	-1.1069	0.476015	0.868455	1.20631
MGP_C57BL6NJ_G0035373	-1.12043	-0.374123	-1.09595	0.604351	0.811514	1.17464
MGP_C57BL6NJ_G0029588	-1.57648	0.0606431	-0.778906	0.471969	0.810551	1.01222
MGP_C57BL6NJ_G0016522	-1.36492	-0.5411	-0.658039	0.641389	0.686134	1.23654
MGP_C57BL6NJ_G0035177	-1.40446	-0.503723	-0.6743	0.76434	0.706551	1.11159
MGP_C57BL6NJ_G0025717	-0.800971	-0.728293	-0.961721	0.105784	1.03874	1.34646
MGP_C57BL6NJ_G0028686	-0.728746	-0.683482	-1.06718	0.120583	0.99727	1.36155
MGP_C57BL6NJ_G0034848	-0.877827	-0.634634	-0.877827	-0.0164656	0.920907	1.48585
MGP_C57BL6NJ_G0034952	-0.800775	-0.640427	-0.934501	-0.0328533	0.909599	1.49896
MGP_C57BL6NJ_G0018423	-0.880551	-0.691533	-0.880551	0.111853	0.839556	1.50123
MGP_C57BL6NJ_G0025770	-0.844961	-0.698091	-0.844961	-0.000139532	0.852675	1.53548
MGP_C57BL6NJ_G0030988	-0.683897	-0.385388	-1.15574	-0.193193	1.00074	1.41748
MGP_C57BL6NJ_G0020939	-0.683204	-0.446742	-1.16993	-0.0813917	0.942551	1.43871
MGP_C57BL6NJ_G0034432	-0.701634	-0.38921	-1.19441	-0.0952743	0.981591	1.39893
MGP_C57BL6NJ_G0016897	-0.779781	-0.447394	-1.15002	-0.00881978	1.08665	1.29936
MGP_C57BL6NJ_G0021943	-0.858661	-0.2941	-1.14257	-0.0701385	0.998219	1.36725
MGP_C57BL6NJ_G0036432	-0.660603	-0.591293	-1.03641	-0.079887	0.778329	1.58986
MGP_C57BL6NJ_G0016573	-0.775943	-0.344941	-1.1468	-0.0646861	0.820044	1.51232
MGP_C57BL6NJ_G0022256	-0.856374	-0.332439	-1.1129	0.0181009	0.748222	1.53539
MGP_C57BL6NJ_G0017822	-1.07212	-0.299627	-0.940662	0.149371	0.57445	1.58859
MGP_C57BL6NJ_G0029384	-1.16051	-0.229599	-0.789795	-0.0509531	0.622591	1.60826
MGP_C57BL6NJ_G0023547	-0.97896	-0.458839	-1.00892	0.199804	0.770649	1.47627
MGP_C57BL6NJ_G0025123	-0.968094	-0.591473	-0.929641	0.19309	0.851952	1.44417
MGP_C57BL6NJ_G0026338	-0.9277	-0.537974	-0.968961	0.132604	0.801866	1.50017
MGP_C57BL6NJ_G0017998	-1.2115	-0.452537	-0.766458	0.168632	0.853814	1.40805
MGP_C57BL6NJ_G0024548	-1.16505	-0.477048	-0.831767	0.171691	1.00315	1.29902
MGP_C57BL6NJ_G0035503	-0.904743	-0.584277	-0.963682	0.0404006	1.21461	1.19769
MGP_C57BL6NJ_G0023390	-0.787553	-0.536907	-1.02956	-0.101125	1.28838	1.16676
MGP_C57BL6NJ_G0031549	-0.772166	-0.528646	-1.11083	0.0107165	1.26383	1.1371
MGP_C57BL6NJ_G0020121	-0.97589	-0.421521	-0.940545	-0.097824	1.28592	1.14986
MGP_C57BL6NJ_G0021434	-0.968656	-0.499764	-0.866055	-0.132992	1.2323	1.23517
MGP_C57BL6NJ_G0029972	-0.968973	-0.546778	-0.846237	-0.100088	1.28145	1.18063
MGP_C57BL6NJ_G0024840	-1.05195	-0.383863	-0.958323	0.0162753	1.17695	1.20091
MGP_C57BL6NJ_G0028647	-0.94881	-0.455632	-0.937229	-0.0961315	1.09029	1.34751
MGP_C57BL6NJ_G0027071	-0.856278	-0.856278	-0.856278	0.243846	1.30055	1.02443
MGP_C57BL6NJ_G0030743	-0.815061	-0.815061	-0.815061	0.0353914	1.43098	0.978816
MGP_C57BL6NJ_G0028781	-0.669905	-0.673363	-1.01516	-0.0746405	1.44212	0.990944
MGP_C57BL6NJ_G0034137	-0.714148	-0.651044	-1.15624	0.214006	1.25703	1.0504
MGP_C57BL6NJ_G0023217	-1.23507	-0.390126	-0.885925	0.298277	1.11694	1.09591
MGP_C57BL6NJ_G0028090	-1.2651	-0.258337	-0.937466	0.296714	0.972452	1.19174
MGP_C57BL6NJ_G0023193	-1.10722	-0.485469	-0.931911	0.299536	0.883668	1.34139
MGP_C57BL6NJ_G0026050	-1.06884	-0.450357	-1.00559	0.276282	0.984008	1.2645
MGP_C57BL6NJ_G0018834	-1.00856	-0.544858	-1.068	0.506203	0.89634	1.21887
MGP_C57BL6NJ_G0016599	-1.02333	-0.459986	-1.08407	0.378509	0.977985	1.2109
MGP_C57BL6NJ_G0023316	-0.924279	-0.487296	-1.15426	0.377737	0.9538	1.2343
MGP_C57BL6NJ_G0021185	-1.13229	-0.489222	-1.02908	0.672546	1.06294	0.915111
MGP_C57BL6NJ_G0022249	-1.22231	-0.552368	-0.868038	0.62406	1.1104	0.908259
MGP_C57BL6NJ_G0016394	-0.851328	-0.517467	-1.25549	0.575125	1.0457	1.00347
MGP_C57BL6NJ_G0035591	-0.914863	-0.624758	-1.09701	0.497284	1.19927	0.940071
MGP_C57BL6NJ_G0031218	-1.04011	-0.501891	-1.01081	0.298794	1.21356	1.04045
MGP_C57BL6NJ_G0019317	-0.907478	-0.401703	-1.23018	0.362074	1.07482	1.10247
MGP_C57BL6NJ_G0034305	-0.883652	-0.462699	-1.20395	0.342005	1.09164	1.11666
MGP_C57BL6NJ_G0026626	-0.359993	-0.89019	-0.745377	0.784736	-0.437067	1.64789
MGP_C57BL6NJ_G0018261	-0.650085	-0.852686	-0.592806	1.06148	-0.44146	1.47556
MGP_C57BL6NJ_G0023765	-0.53569	-0.83466	-0.7016	1.00058	-0.451498	1.52287
MGP_C57BL6NJ_G0023679	-0.636003	-0.636003	-0.636003	1.00181	-0.636003	1.5422
MGP_C57BL6NJ_G0029840	-0.684822	-0.513125	-0.684822	1.15438	-0.684822	1.41321
MGP_C57BL6NJ_G0025275	-0.641086	-0.605685	-0.889789	1.345	-0.412961	1.20452
MGP_C57BL6NJ_G0016806	-0.683191	-0.747346	-0.704017	1.26656	-0.43151	1.2995
MGP_C57BL6NJ_G0020808	-0.68821	-0.68821	-0.68821	1.42466	-0.499973	1.13995
MGP_C57BL6NJ_G0022081	-0.830306	-1.19198	-0.229184	0.563608	0.103945	1.58392
MGP_C57BL6NJ_G0017855	-0.668252	-1.1216	-0.594294	1.17292	-0.0397479	1.25097
MGP_C57BL6NJ_G0034360	-0.609093	-1.29573	-0.376485	1.25074	-0.0817717	1.11234
MGP_C57BL6NJ_G0019314	-0.34956	-1.36321	-0.684045	0.926387	0.181922	1.28851
MGP_C57BL6NJ_G0032940	-0.3949	-1.20815	-0.760098	1.16611	-0.00580959	1.20284
MGP_C57BL6NJ_G0019124	-0.300549	-0.849249	-1.29867	0.316673	0.811573	1.32022
MGP_C57BL6NJ_G0025120	-0.268191	-1.0389	-1.17315	1.04644	0.298826	1.13497
MGP_C57BL6NJ_G0029832	-0.168473	-1.00112	-1.16087	0.787697	0.134492	1.40827
MGP_C57BL6NJ_G0025252	-1.12099	-0.546978	-0.833651	0.530438	0.473193	1.49798
MGP_C57BL6NJ_G0023671	-1.04635	-0.332604	-1.04635	0.419396	0.497021	1.50889
MGP_C57BL6NJ_G0036666	-0.9896	-0.384618	-0.9896	0.381828	0.365089	1.6169
MGP_C57BL6NJ_G0024760	-0.801888	-0.406464	-1.33867	0.526375	0.808874	1.21177
MGP_C57BL6NJ_G0033973	-0.784069	-0.47315	-1.23602	0.326911	0.782958	1.38337
MGP_C57BL6NJ_G0023237	-1.03917	-0.380479	-1.10812	0.597809	0.56021	1.36975
MGP_C57BL6NJ_G0030346	-0.987486	-0.511413	-1.07167	0.567251	0.623229	1.38009
MGP_C57BL6NJ_G0026002	-1.06169	-0.619806	-0.955303	0.676765	0.666033	1.294
MGP_C57BL6NJ_G0027896	-0.979602	-0.502047	-1.15211	0.798	0.654083	1.18167
MGP_C57BL6NJ_G0022586	-0.970213	-0.680513	-0.861176	0.745629	0.275623	1.49065
MGP_C57BL6NJ_G0017036	-0.79181	-0.97552	-0.802196	0.651311	0.452206	1.46601
MGP_C57BL6NJ_G0034452	-0.860676	-0.987278	-0.652739	0.666443	0.312117	1.52213
MGP_C57BL6NJ_G0019241	-0.785584	-0.785584	-0.785584	0.267121	0.376257	1.71337
MGP_C57BL6NJ_G0019257	-0.781122	-0.781122	-0.781122	0.27595	0.342229	1.72519
MGP_C57BL6NJ_G0032671	-0.998452	-0.796304	-0.717742	0.404302	0.570294	1.5379
MGP_C57BL6NJ_G0017870	-0.792435	-0.859863	-0.813504	0.314051	0.548027	1.60372
MGP_C57BL6NJ_G0021443	-0.836896	-0.880254	-0.688117	0.141966	0.646968	1.61633
MGP_C57BL6NJ_G0029456	-0.66464	-0.627888	-1.18774	0.381023	0.599794	1.49945
MGP_C57BL6NJ_G0020984	-0.788084	-0.748028	-0.994386	0.46662	0.540492	1.52339
MGP_C57BL6NJ_G0025989	-0.744932	-0.748454	-1.11848	0.585002	0.668783	1.35808
MGP_C57BL6NJ_G0017019	-0.721434	-0.78697	-1.06164	0.65874	0.46952	1.44178
MGP_C57BL6NJ_G0028784	-0.862697	-0.7182	-1.02077	0.655106	0.540689	1.40587
MGP_C57BL6NJ_G0022342	-0.909071	-0.812944	-0.895517	0.477406	0.759603	1.38052
MGP_C57BL6NJ_G0029072	-0.858106	-0.858106	-0.858106	0.440457	0.666755	1.46711
MGP_C57BL6NJ_G0025643	-0.821234	-0.822767	-0.965262	0.3962	0.870842	1.34222
MGP_C57BL6NJ_G0027232	-0.941283	-0.761418	-0.854443	0.298002	0.843659	1.41548
MGP_C57BL6NJ_G0028069	-0.698119	-0.873155	-0.951188	0.264105	0.793298	1.46506
MGP_C57BL6NJ_G0030527	-0.642657	-1.09849	-0.793385	0.367604	0.717445	1.44948
MGP_C57BL6NJ_G0028445	-0.504631	-0.116734	-1.44935	0.395908	0.105323	1.56948
MGP_C57BL6NJ_G0032203	-0.523033	-0.206804	-1.3388	-0.0533261	0.496579	1.62538
MGP_C57BL6NJ_G0017766	-0.846918	-0.282764	-0.846918	0.393529	-0.227675	1.81075
MGP_C57BL6NJ_G0023006	-0.739742	-0.345603	-1.05074	0.711429	-0.211877	1.63654
MGP_C57BL6NJ_G0022571	-0.956311	-0.699061	-0.563062	0.494716	-0.0183112	1.74203
MGP_C57BL6NJ_G0025929	-0.526621	-0.746525	-0.978005	0.476398	0.0486132	1.72614
MGP_C57BL6NJ_G0023024	-0.548654	-0.825545	-0.825545	0.753098	-0.204681	1.65133
MGP_C57BL6NJ_G0030042	-0.751025	-0.751025	-0.751025	0.614374	-0.0716466	1.71035
MGP_C57BL6NJ_G0023878	-0.695615	-0.663839	-0.517118	0.381365	-0.380397	1.8756
MGP_C57BL6NJ_G0025696	-0.552892	-0.552892	-0.552892	0.13986	-0.446819	1.96564
MGP_C57BL6NJ_G0029913	-0.552802	-0.552802	-0.552802	-0.0278485	-0.310287	1.99654
MGP_C57BL6NJ_G0026774	-0.656817	-0.656817	-0.656817	-0.186967	0.259076	1.89834
MGP_C57BL6NJ_G0027159	-0.661634	-0.547057	-0.661634	-0.272965	0.219044	1.92425
MGP_C57BL6NJ_G0029386	-0.704949	-0.62957	-0.704949	0.0645759	0.0776476	1.89724
MGP_C57BL6NJ_G0026568	-0.685303	-0.615728	-0.619038	0.0748997	-0.0923287	1.9375
MGP_C57BL6NJ_G0035383	-0.649066	-0.649066	-0.649066	0.121416	-0.100681	1.92646
MGP_C57BL6NJ_G0029906	-0.536458	-0.536458	-0.536458	2.00262	-0.0403394	-0.352903
MGP_C57BL6NJ_G0028125	-0.602934	-0.681512	-0.681512	1.89274	-0.210776	0.283991
MGP_C57BL6NJ_G0028705	-0.559413	-0.559413	-0.559413	1.93513	-0.50491	0.248022
MGP_C57BL6NJ_G0033495	-0.58034	-0.58034	-0.58034	1.90555	-0.49757	0.333038
MGP_C57BL6NJ_G0026705	-0.892411	-0.721503	-0.936228	1.48844	0.4137	0.648001
MGP_C57BL6NJ_G0027316	-0.809348	-0.788523	-0.956934	1.46947	0.370698	0.714637
MGP_C57BL6NJ_G0025103	-0.683743	-0.883151	-0.996209	1.4539	0.429859	0.679347
MGP_C57BL6NJ_G0031964	-0.768346	-0.790543	-1.04221	1.40751	0.546474	0.647118
MGP_C57BL6NJ_G0019670	-0.955317	-0.694695	-0.918876	1.46758	0.56088	0.54043
MGP_C57BL6NJ_G0027306	-0.870718	-0.674671	-1.0119	1.47359	0.49677	0.586925
MGP_C57BL6NJ_G0035765	-0.855472	-0.855472	-0.855472	1.48538	0.623688	0.45735
MGP_C57BL6NJ_G0018787	-0.909142	-0.790448	-0.909142	1.41119	0.68125	0.516294
MGP_C57BL6NJ_G0030859	-0.920447	-0.726576	-0.920447	1.46855	0.642162	0.456754
MGP_C57BL6NJ_G0032976	-0.830377	-0.861183	-0.93333	1.37015	0.756281	0.49846
MGP_C57BL6NJ_G0022785	-0.880099	-0.880099	-0.880099	1.29685	0.886247	0.457203
MGP_C57BL6NJ_G0026909	-0.782538	-0.874488	-0.934916	1.34799	0.903097	0.340858
MGP_C57BL6NJ_G0017334	-0.553092	-1.1087	-0.842998	1.47809	0.658991	0.367713
MGP_C57BL6NJ_G0033770	-0.694773	-1.13528	-0.820355	1.25429	0.759882	0.636238
MGP_C57BL6NJ_G0035615	-1.10415	-1.10415	-0.403144	1.10004	0.908908	0.602489
MGP_C57BL6NJ_G0036064	-1.00439	-0.934705	-0.729025	1.22744	0.864665	0.57601
MGP_C57BL6NJ_G0025104	-1.03127	-1.04543	-0.364259	1.47487	0.668764	0.29732
MGP_C57BL6NJ_G0030954	-0.610391	-1.33976	-0.439387	1.46632	0.639306	0.28391
MGP_C57BL6NJ_G0018245	-0.72759	-1.05045	-0.660219	1.52595	0.761606	0.150706
MGP_C57BL6NJ_G0026143	-0.743509	-1.1695	-0.570507	1.42196	0.821096	0.240462
MGP_C57BL6NJ_G0019865	-0.0799354	-1.0287	-1.16395	1.20636	1.06079	0.00543231
MGP_C57BL6NJ_G0031963	-0.237275	-0.883643	-1.27963	1.40267	0.67224	0.325634
MGP_C57BL6NJ_G0027726	-0.937043	-0.611374	-0.626538	1.64876	0.762483	-0.236289
MGP_C57BL6NJ_G0032535	-0.683751	-0.683751	-0.683751	1.82275	0.467044	-0.238543
MGP_C57BL6NJ_G0017680	-1.16178	-0.484848	-0.766711	1.27533	1.095	0.0430112
MGP_C57BL6NJ_G0034481	-0.856803	-0.856803	-0.696089	1.15972	1.30361	-0.0536407
MGP_C57BL6NJ_G0017438	-0.778553	-0.381442	-1.41709	0.863455	0.971723	0.741904
MGP_C57BL6NJ_G0021230	-0.965822	-0.326331	-1.29893	0.748113	0.833371	1.0096
MGP_C57BL6NJ_G0034451	-0.921726	-0.158327	-1.42127	0.874642	0.720317	0.906363
MGP_C57BL6NJ_G0018375	-1.17867	-0.239506	-1.14714	0.832108	1.01328	0.71993
MGP_C57BL6NJ_G0030426	-1.11534	-0.354323	-1.15466	0.844637	0.899549	0.880135
MGP_C57BL6NJ_G0020589	-1.20983	-0.0389971	-1.20983	0.9403	0.889962	0.628402
MGP_C57BL6NJ_G0028862	-1.19147	-0.0882591	-1.19147	1.08372	0.604344	0.783139
MGP_C57BL6NJ_G0027974	-0.517302	-0.524746	-1.43189	1.25929	0.811316	0.40333
MGP_C57BL6NJ_G0016586	-0.665983	-0.598047	-1.21981	1.48676	0.457665	0.539417
MGP_C57BL6NJ_G0022993	-0.74917	-0.358763	-1.26328	1.52001	0.569562	0.281637
MGP_C57BL6NJ_G0026635	-1.09019	-0.194608	-1.02201	1.49303	0.697447	0.116325
MGP_C57BL6NJ_G0035944	-1.01577	-0.573152	-1.01577	1.27166	0.892673	0.440368
MGP_C57BL6NJ_G0028318	-1.20304	-0.350266	-1.01357	1.22539	0.696189	0.645297
MGP_C57BL6NJ_G0029489	-1.21453	-0.475613	-0.879337	1.30285	0.74703	0.5196
MGP_C57BL6NJ_G0028260	-0.919253	-0.725984	-0.919253	0.746352	1.44434	0.373795
MGP_C57BL6NJ_G0034570	-0.850408	-0.850408	-0.850408	0.65019	1.49856	0.402471
MGP_C57BL6NJ_G0024270	-0.892757	-0.892757	-0.892757	0.724932	1.27303	0.680305
MGP_C57BL6NJ_G0029154	-0.883588	-0.760272	-1.02951	0.828975	1.23306	0.611338
MGP_C57BL6NJ_G0035858	-1.20787	-0.925201	-0.418315	0.441441	1.26622	0.843723
MGP_C57BL6NJ_G0025418	-0.994708	-0.854973	-0.810901	0.474294	1.03342	1.15286
MGP_C57BL6NJ_G0036647	-0.891099	-0.891099	-0.891099	0.503001	1.01543	1.15486
MGP_C57BL6NJ_G0017672	-0.719586	-0.980784	-0.929608	0.422997	1.24803	0.958955
MGP_C57BL6NJ_G0034051	-0.804329	-0.91805	-0.927234	0.437182	1.18343	1.029
MGP_C57BL6NJ_G0034487	-0.908325	-0.514421	-1.22459	0.692903	0.875534	1.0789
MGP_C57BL6NJ_G0020091	-0.911428	-0.627473	-1.15022	0.729387	0.991663	0.968073
MGP_C57BL6NJ_G0023821	-0.959828	-0.60812	-1.12447	0.798581	0.864964	1.02888
MGP_C57BL6NJ_G0026033	-0.979589	-0.502467	-1.18254	1.00417	0.793675	0.866752
MGP_C57BL6NJ_G0035565	-1.07418	-0.542292	-1.0702	0.887249	0.883313	0.916115
MGP_C57BL6NJ_G0026983	-0.780224	-0.606341	-1.27159	1.05976	0.743734	0.854657
MGP_C57BL6NJ_G0017842	-0.664252	-0.834922	-1.19313	0.778282	0.939222	0.974804
MGP_C57BL6NJ_G0025411	-0.69066	-0.808852	-1.19336	0.770385	1.00097	0.921516
MGP_C57BL6NJ_G0022919	-0.780168	-0.838032	-1.10098	0.960334	0.942206	0.816637
MGP_C57BL6NJ_G0026999	-0.846189	-0.71784	-1.13499	0.882718	1.06911	0.747192
MGP_C57BL6NJ_G0033875	-0.872742	-1.02987	-0.791364	0.965364	0.613868	1.11475
MGP_C57BL6NJ_G0023817	-0.890915	-0.934907	-0.893451	0.877743	0.736486	1.10504
MGP_C57BL6NJ_G0032470	-0.845662	-1.0271	-0.838485	0.851322	0.739635	1.12029
MGP_C57BL6NJ_G0032705	-0.670042	-1.1294	-0.847269	1.0676	0.4971	1.08201
MGP_C57BL6NJ_G0035209	-0.671082	-1.15216	-0.829007	0.805534	0.622639	1.22408
MGP_C57BL6NJ_G0033337	-1.0428	-0.759487	-0.924678	0.938843	0.876696	0.911426
MGP_C57BL6NJ_G0026734	-0.921899	-0.755484	-1.04564	0.825758	0.902325	0.994942
MGP_C57BL6NJ_G0023770	-0.91054	-0.91054	-0.91054	0.810836	0.887624	1.03316
MGP_C57BL6NJ_G0033078	-0.912186	-0.912186	-0.912186	0.851914	0.91029	0.974354
MGP_C57BL6NJ_G0030969	-0.694672	-1.06549	-0.946107	0.805699	1.07641	0.824155
MGP_C57BL6NJ_G0018950	-0.806236	-1.10725	-0.798646	0.806529	0.852792	1.05281
MGP_C57BL6NJ_G0029619	-0.789431	-1.11589	-0.807769	0.789808	0.907829	1.01545
MGP_C57BL6NJ_G0029863	-0.936473	-0.755992	-0.985838	1.09894	0.539928	1.03943
MGP_C57BL6NJ_G0023253	-0.965391	-0.594083	-1.09394	1.17863	0.592942	0.88184
MGP_C57BL6NJ_G0032328	-1.05665	-0.643984	-0.991031	1.0922	0.714307	0.885152
MGP_C57BL6NJ_G0033244	-1.01685	-0.656068	-1.01685	1.11183	0.687826	0.890121
MGP_C57BL6NJ_G0018522	-1.09829	-0.52304	-0.966097	1.20588	0.392151	0.989404
MGP_C57BL6NJ_G0028255	-1.13377	-0.598948	-0.876433	1.23169	0.441806	0.935656
MGP_C57BL6NJ_G0033761	-1.14519	-0.566238	-0.916727	1.24603	0.59156	0.790569
MGP_C57BL6NJ_G0034159	-1.06309	-0.543456	-0.99337	1.28485	0.467576	0.847489
MGP_C57BL6NJ_G0016531	-1.05457	-0.339998	-1.17975	1.0195	0.520151	1.03467
MGP_C57BL6NJ_G0021326	-1.24142	-0.488703	-0.89871	1.10097	0.635372	0.892494
MGP_C57BL6NJ_G0023108	-1.19019	-0.545678	-0.899521	1.17189	0.604669	0.858826
MGP_C57BL6NJ_G0021216	-1.09602	-0.518039	-1.03503	1.16446	0.765277	0.719357
MGP_C57BL6NJ_G0033892	-1.07415	-0.438294	-1.10584	1.16554	0.632828	0.819912
MGP_C57BL6NJ_G0019207	-0.926218	-0.497511	-1.16815	1.28838	0.550369	0.753131
MGP_C57BL6NJ_G0035725	-0.922191	-0.518768	-1.0835	1.40892	0.335057	0.780484
MGP_C57BL6NJ_G0027496	-0.725086	-0.560131	-1.29928	1.18591	0.489574	0.909012
MGP_C57BL6NJ_G0019823	-0.698962	-0.653557	-1.23988	1.12444	0.413678	1.05428
MGP_C57BL6NJ_G0031720	-0.744281	-0.630205	-1.19726	1.14137	0.334568	1.09581
MGP_C57BL6NJ_G0017098	-1.08084	-0.873054	-0.746815	1.05615	0.673778	0.970773
MGP_C57BL6NJ_G0018373	-1.01075	-1.01428	-0.64199	1.20375	0.637072	0.826193
MGP_C57BL6NJ_G0022162	-0.965706	-0.687679	-1.00462	1.27779	0.686996	0.693215
MGP_C57BL6NJ_G0027591	-0.977289	-0.734138	-0.977289	1.19837	0.699349	0.790999
MGP_C57BL6NJ_G0022912	-1.20583	-0.663076	-0.800469	1.13095	0.72967	0.808752
MGP_C57BL6NJ_G0026074	-1.09392	-0.770037	-0.814497	1.21016	0.781899	0.686397
MGP_C57BL6NJ_G0035163	-1.12408	-0.652243	-0.890312	1.2029	0.74043	0.723303
MGP_C57BL6NJ_G0028317	-0.801086	-0.858304	-1.03095	1.01237	1.09	0.587968
MGP_C57BL6NJ_G0031910	-0.748157	-0.902016	-1.0255	1.14842	0.975578	0.551684
MGP_C57BL6NJ_G0026835	-1.19452	-0.739309	-0.759559	0.932326	1.0024	0.758668
MGP_C57BL6NJ_G0031012	-1.1774	-0.543858	-0.945413	1.03438	0.921082	0.711205
MGP_C57BL6NJ_G0033538	-1.21912	-0.62451	-0.797747	1.16931	0.871195	0.600873
MGP_C57BL6NJ_G0019899	-1.54661	-0.546413	-0.188457	1.35836	0.498131	0.424989
MGP_C57BL6NJ_G0016937	-1.54491	0.0372429	-0.808833	1.10638	0.631359	0.578757
MGP_C57BL6NJ_G0036664	-1.62305	-0.0823381	-0.59844	1.01843	0.380542	0.904862
MGP_C57BL6NJ_G0032138	-1.42099	-0.223489	-0.53191	0.795593	-0.0381726	1.41897
MGP_C57BL6NJ_G0029837	-0.994032	-0.806606	-0.620457	0.981875	0.0208384	1.41838
MGP_C57BL6NJ_G0022718	-0.832304	-0.832304	-0.832304	0.934487	0.137802	1.42462
MGP_C57BL6NJ_G0028165	-0.834121	-0.834121	-0.834121	1.00663	0.123041	1.37269
MGP_C57BL6NJ_G0026561	-1.19336	-0.659568	-0.753206	1.11089	0.41475	1.08049
MGP_C57BL6NJ_G0036411	-1.04896	-0.803733	-0.789695	1.11216	0.431658	1.09857
MGP_C57BL6NJ_G0016530	-1.11775	-0.821014	-0.687845	0.919266	0.465797	1.24154
MGP_C57BL6NJ_G0017668	-1.07705	-0.662315	-0.904464	0.901986	0.515497	1.22635
MGP_C57BL6NJ_G0019138	-0.918592	-0.80481	-0.829734	1.31963	0.218118	1.01538
MGP_C57BL6NJ_G0028123	-0.875685	-0.821212	-0.908698	1.08023	0.313912	1.21145
MGP_C57BL6NJ_G0030757	-0.203867	-1.31715	-0.885509	1.28442	0.278076	0.844024
MGP_C57BL6NJ_G0025077	-0.634	-1.03459	-0.840728	1.34852	0.175058	0.98574
MGP_C57BL6NJ_G0033729	-0.533391	-1.06047	-0.882017	1.45222	0.211776	0.811879
MGP_C57BL6NJ_G0016572	-0.576676	-1.10819	-0.744784	1.42692	0.0855394	0.917188
MGP_C57BL6NJ_G0027138	-0.44653	-1.10303	-0.852397	1.44316	0.0825404	0.876254
MGP_C57BL6NJ_G0020625	-0.407771	-1.30335	-0.885866	1.12083	0.690853	0.785301
MGP_C57BL6NJ_G0030294	-0.63525	-1.32218	-0.67854	1.07488	0.696773	0.864314
MGP_C57BL6NJ_G0035849	-0.347111	-0.940715	-1.25762	1.23216	0.529424	0.78387
MGP_C57BL6NJ_G0032566	-0.556085	-0.909242	-1.17946	1.00568	0.576463	1.06265
MGP_C57BL6NJ_G0018970	-0.693911	-0.899604	-1.04379	1.2585	0.482865	0.895943
MGP_C57BL6NJ_G0033030	-0.714244	-0.893742	-1.07827	1.17395	0.698203	0.814105
MGP_C57BL6NJ_G0022611	-0.723314	-0.794748	-1.03338	1.26234	0.224484	1.06462
MGP_C57BL6NJ_G0020544	-0.739794	-0.635623	-1.12511	1.37772	0.204786	0.918017
MGP_C57BL6NJ_G0024874	-0.740261	-0.600941	-1.18308	1.28056	0.249062	0.994656
MGP_C57BL6NJ_G0023468	-0.434983	-0.831329	-1.1685	1.42846	0.181129	0.825215
MGP_C57BL6NJ_G0035986	-0.652176	-0.712508	-1.00803	1.52142	-0.00666785	0.857966
MGP_C57BL6NJ_G0028655	-0.752955	-0.651627	-0.852273	1.50254	-0.231098	0.985416
MGP_C57BL6NJ_G0034357	-0.847574	-0.625657	-0.837942	1.43168	-0.173265	1.05276
MGP_C57BL6NJ_G0016580	-0.703083	-0.794411	-0.823656	1.52323	-0.129057	0.926972
MGP_C57BL6NJ_G0029830	-0.624973	-0.687321	-0.927362	1.49042	-0.247865	0.997101
MGP_C57BL6NJ_G0028684	-0.555684	-0.66508	-1.09524	1.24084	-0.144944	1.2201
MGP_C57BL6NJ_G0029904	-0.710246	-0.55123	-1.07983	1.37487	-0.0948753	1.06131
MGP_C57BL6NJ_G0030019	-0.656707	-0.51615	-1.2158	1.32733	0.0310982	1.03023
MGP_C57BL6NJ_G0030354	-0.472596	-0.9411	-0.756335	1.47139	-0.325181	1.02382
MGP_C57BL6NJ_G0030583	-0.246186	-0.827555	-1.06515	1.38035	-0.301518	1.06006
MGP_C57BL6NJ_G0019822	-0.52954	-0.845624	-0.774549	1.74728	-0.166635	0.569071
MGP_C57BL6NJ_G0025170	-0.410103	-1.0178	-0.935673	1.58391	0.157776	0.621898
MGP_C57BL6NJ_G0029470	-0.624145	-0.624145	-0.624145	1.6516	-0.624145	0.844978
MGP_C57BL6NJ_G0034174	-0.603218	-0.668474	-0.8036	1.62308	-0.409054	0.861266
MGP_C57BL6NJ_G0032279	-0.692096	-0.692096	-0.692096	1.55304	-0.450479	0.973728
MGP_C57BL6NJ_G0034507	-0.666217	-0.666217	-0.666217	1.62088	-0.507482	0.885249
MGP_C57BL6NJ_G0035426	-0.621452	-0.621452	-0.621452	1.79469	-0.521066	0.590732
MGP_C57BL6NJ_G0023776	-0.824219	-0.586979	-0.708003	1.77327	-0.194814	0.540744
MGP_C57BL6NJ_G0024995	-0.696121	-0.696121	-0.696121	1.79909	-0.221208	0.510485
MGP_C57BL6NJ_G0018367	-0.72197	-0.72197	-0.72197	1.66804	-0.265839	0.763713
MGP_C57BL6NJ_G0025081	-0.836578	-0.642397	-0.607965	1.7092	-0.323546	0.70129
MGP_C57BL6NJ_G0016564	-0.724832	-0.979549	-0.506777	1.45043	-0.277351	1.03808
MGP_C57BL6NJ_G0019167	-0.906391	-0.75778	-0.530349	1.40497	-0.325406	1.11496
MGP_C57BL6NJ_G0016537	-0.919535	-0.800054	-0.613376	1.44183	-0.129847	1.02098
MGP_C57BL6NJ_G0023665	-0.936296	-0.833934	-0.56827	1.41509	-0.119737	1.04315
MGP_C57BL6NJ_G0027817	-0.917675	-0.803938	-0.734556	1.26758	0.020338	1.16825
MGP_C57BL6NJ_G0035723	-0.862501	-0.862501	-0.652838	1.23285	-0.102252	1.24725
MGP_C57BL6NJ_G0018195	-1.02996	-0.681687	-0.668934	1.41057	-0.0473732	1.01738
MGP_C57BL6NJ_G0029111	-0.91561	-0.783191	-0.719302	1.47087	0.0160188	0.931213
MGP_C57BL6NJ_G0034476	-0.938065	-0.805163	-0.668841	1.4054	-0.0175108	1.02418
MGP_C57BL6NJ_G0034624	-0.896755	-0.933941	-0.599992	1.49298	0.084826	0.852881
MGP_C57BL6NJ_G0017882	-0.769539	-0.967236	-0.625309	1.47827	-0.060791	0.944606
MGP_C57BL6NJ_G0030762	-0.77686	-0.947694	-0.642191	1.5509	-0.00912594	0.824968
MGP_C57BL6NJ_G0023784	-0.844355	-0.844355	-0.509631	1.6958	-0.143952	0.646498
MGP_C57BL6NJ_G0026617	-0.761838	-0.761838	-0.761838	1.64812	-0.0932262	0.730617
MGP_C57BL6NJ_G0032311	-0.873829	-0.731984	-0.734397	1.56485	-0.0661561	0.841516
MGP_C57BL6NJ_G0024626	-1.00923	-1.00923	-0.316312	1.51232	0.0666044	0.755843
MGP_C57BL6NJ_G0035722	-0.973681	-0.973681	-0.421424	1.50781	0.0548831	0.806091
MGP_C57BL6NJ_G0021758	-1.12283	-0.66838	-0.479491	1.45042	-0.147738	0.968017
MGP_C57BL6NJ_G0029601	-1.05788	-0.778865	-0.393749	1.42273	-0.216126	1.02389
MGP_C57BL6NJ_G0017894	-1.31276	-0.369353	-0.556879	1.31817	-0.117783	1.03861
MGP_C57BL6NJ_G0022578	-1.28911	-0.652349	-0.316689	1.34507	-0.084875	0.997956
MGP_C57BL6NJ_G0025982	-1.29687	-0.611868	-0.414567	1.45123	0.0581671	0.813901
MGP_C57BL6NJ_G0024015	-1.08769	-0.513524	-0.700881	1.29166	-0.159282	1.16971
MGP_C57BL6NJ_G0029080	-0.939787	-0.585159	-0.732978	1.34019	-0.255243	1.17298
MGP_C57BL6NJ_G0019318	-0.86828	-0.673328	-0.875884	1.32523	-0.0338676	1.12613
MGP_C57BL6NJ_G0035948	-0.936183	-0.532736	-0.990892	1.32156	0.0876918	1.05056
MGP_C57BL6NJ_G0019813	-0.800016	-0.702246	-0.901494	1.65572	0.50234	0.245694
MGP_C57BL6NJ_G0026809	-0.839992	-0.738704	-0.793551	1.67918	0.51856	0.174505
MGP_C57BL6NJ_G0026015	-0.837262	-0.541367	-0.95987	1.68899	0.427117	0.222395
MGP_C57BL6NJ_G0028340	-0.832283	-0.53079	-0.832283	1.79527	0.322192	0.077894
MGP_C57BL6NJ_G0029350	-0.890268	-0.672893	-0.908849	1.58956	0.361949	0.520502
MGP_C57BL6NJ_G0030658	-0.963491	-0.605412	-0.849984	1.63432	0.347984	0.436588
MGP_C57BL6NJ_G0023136	-0.925859	-0.80009	-0.731095	1.61236	0.345882	0.498802
MGP_C57BL6NJ_G0016867	-0.818398	-0.818398	-0.818398	1.62672	0.439481	0.388992
MGP_C57BL6NJ_G0019915	-0.828442	-0.722662	-0.828442	1.69371	0.317644	0.36819
MGP_C57BL6NJ_G0033246	-0.692249	-0.740298	-0.764785	1.81951	0.134825	0.242995
MGP_C57BL6NJ_G0029061	-0.728573	-0.728573	-0.728573	1.81585	0.0402952	0.329575
MGP_C57BL6NJ_G0029710	-0.751525	-0.702556	-0.751525	1.78769	-0.007451	0.425363
MGP_C57BL6NJ_G0030493	-0.863439	-0.892118	-0.540866	1.72109	0.149088	0.426244
MGP_C57BL6NJ_G0019871	-0.758402	-0.811299	-0.741901	1.70104	0.0442608	0.566297
MGP_C57BL6NJ_G0024965	-0.783928	-0.783928	-0.783928	1.69116	0.132649	0.527975
MGP_C57BL6NJ_G0017754	-1.16161	-0.0870877	-0.975311	1.54794	0.154738	0.521325
MGP_C57BL6NJ_G0033823	-1.12498	-0.663149	-0.76043	1.4264	0.399599	0.722563
MGP_C57BL6NJ_G0024936	-0.991841	-0.654789	-0.938991	1.39388	0.433437	0.758302
MGP_C57BL6NJ_G0026027	-1.0313	-0.683198	-0.870662	1.36526	0.382351	0.837544
MGP_C57BL6NJ_G0033643	-1.18342	-0.512829	-0.797197	1.30171	0.21087	0.98086
MGP_C57BL6NJ_G0025995	-1.01656	-0.630796	-0.887201	1.37602	0.249858	0.908682
MGP_C57BL6NJ_G0026022	-1.03006	-0.62686	-0.88624	1.33414	0.251098	0.957927
MGP_C57BL6NJ_G0020008	-1.05825	-0.485359	-0.924034	1.35844	0.148285	0.960909
MGP_C57BL6NJ_G0024054	-1.09477	-0.510682	-0.894214	1.34781	0.214627	0.937233
MGP_C57BL6NJ_G0025268	-0.77521	-0.74985	-0.927391	1.53743	0.145741	0.769283
MGP_C57BL6NJ_G0029605	-0.863597	-0.734603	-0.919079	1.46609	0.235827	0.815363
MGP_C57BL6NJ_G0025970	-0.745506	-0.750356	-0.966324	1.5723	0.245782	0.644106
MGP_C57BL6NJ_G0029718	-0.73476	-0.743882	-1.05244	1.46534	0.327919	0.73782
MGP_C57BL6NJ_G0024238	-0.878968	-0.53888	-0.878968	1.69547	0.0672206	0.534123
MGP_C57BL6NJ_G0034963	-0.855682	-0.836858	-0.768558	1.55049	0.174088	0.736516
MGP_C57BL6NJ_G0017928	-0.96388	-0.84485	-0.672147	1.54008	0.257105	0.683692
MGP_C57BL6NJ_G0020359	-0.877081	-0.879835	-0.654812	1.60842	0.158579	0.644728
MGP_C57BL6NJ_G0019032	-0.883447	-0.633788	-0.883447	1.60323	0.12573	0.671725
MGP_C57BL6NJ_G0030162	-0.979065	-0.583481	-0.851695	1.53255	0.0957392	0.785951
MGP_C57BL6NJ_G0035052	-0.989968	-0.647234	-0.858972	1.52566	0.305494	0.66502
MGP_C57BL6NJ_G0019955	-0.963132	-0.754755	-0.778813	1.51732	0.250605	0.728776
MGP_C57BL6NJ_G0020523	-0.996082	-0.645734	-0.830079	1.52185	0.215694	0.734356
MGP_C57BL6NJ_G0032755	-1.03039	-0.683389	-0.775175	1.4763	0.207849	0.804808
