# Supplementary material for: LncRNA-mRNA Expression Profiles of Osteoclast After Conditional Knockout HIF-1α
Source: Front Genet. 2022 Jun 21;13:909095. doi: 10.3389/fgene.2022.909095 (PMC9253292; doi:10.3389/fgene.2022.909095)
Supplement: Supplementary file 4 [file Table9.XLSX]

## Sheet: Sheet1
GeneID	Symbol	Family	Description
MGP_C57BL6NJ_G0020598	Klf6	zf-C2H2	Kruppel-like factor 6 [Source:MGI Symbol;Acc:MGI:1346318]
MGP_C57BL6NJ_G0019275	Tbx2	T-box	T-box 2 [Source:MGI Symbol;Acc:MGI:98494]
MGP_C57BL6NJ_G0019277	Tbx4	T-box	T-box 4 [Source:MGI Symbol;Acc:MGI:102556]
MGP_C57BL6NJ_G0036021	Tfe3	bHLH	transcription factor E3 [Source:MGI Symbol;Acc:MGI:98511]
MGP_C57BL6NJ_G0026119	Lhx2	Homeobox	LIM homeobox protein 2 [Source:MGI Symbol;Acc:MGI:96785]
MGP_C57BL6NJ_G0019090	Mnt	bHLH	max binding protein [Source:MGI Symbol;Acc:MGI:109150]
MGP_C57BL6NJ_G0018977	Bcl6b	ZBTB	B cell CLL/lymphoma 6, member B [Source:MGI Symbol;Acc:MGI:1278332]
MGP_C57BL6NJ_G0018106	Myf5	bHLH	myogenic factor 5 [Source:MGI Symbol;Acc:MGI:97252]
MGP_C57BL6NJ_G0031590	Mkrn2	zf-CCCH	makorin, ring finger protein, 2 [Source:MGI Symbol;Acc:MGI:1914277]
MGP_C57BL6NJ_G0031587	Pparg	THR-like	peroxisome proliferator activated receptor gamma [Source:MGI Symbol;Acc:MGI:97747]
MGP_C57BL6NJ_G0022854	Zfp385a	zf-C2H2	zinc finger protein 385A [Source:MGI Symbol;Acc:MGI:1352495]
MGP_C57BL6NJ_G0019740	Sox9	HMG	SRY (sex determining region Y)-box 9 [Source:MGI Symbol;Acc:MGI:98371]
MGP_C57BL6NJ_G0019397	Hoxb6	Homeobox	homeobox B6 [Source:MGI Symbol;Acc:MGI:96187]
MGP_C57BL6NJ_G0017810	Aire	SAND	autoimmune regulator (autoimmune polyendocrinopathy candidiasis ectodermal dystrophy) [Source:MGI Symbol;Acc:MGI:1338803]
MGP_C57BL6NJ_G0018675	Tcf7	HMG	transcription factor 7, T cell specific [Source:MGI Symbol;Acc:MGI:98507]
MGP_C57BL6NJ_G0027449	Zfp512b	zf-C2H2	zinc finger protein 512B [Source:MGI Symbol;Acc:MGI:2685478]
MGP_C57BL6NJ_G0018488	Bcl11a	zf-C2H2	B cell CLL/lymphoma 11A (zinc finger protein) [Source:MGI Symbol;Acc:MGI:106190]
MGP_C57BL6NJ_G0031184	Hoxa10	Homeobox	homeobox A10 [Source:MGI Symbol;Acc:MGI:96171]
MGP_C57BL6NJ_G0031179	Hoxa4	Homeobox	homeobox A4 [Source:MGI Symbol;Acc:MGI:96176]
MGP_C57BL6NJ_G0034743	Zfp276	zf-C2H2	zinc finger protein (C2H2 type) 276 [Source:MGI Symbol;Acc:MGI:1888495]
MGP_C57BL6NJ_G0019174	Sebox	Homeobox	SEBOX homeobox [Source:MGI Symbol;Acc:MGI:108012]
MGP_C57BL6NJ_G0031416	Mxd1	bHLH	MAX dimerization protein 1 [Source:MGI Symbol;Acc:MGI:96908]
MGP_C57BL6NJ_G0022827	Sp1	zf-C2H2	trans-acting transcription factor 1 [Source:MGI Symbol;Acc:MGI:98372]
MGP_C57BL6NJ_G0022820	Rarg	THR-like	retinoic acid receptor, gamma [Source:MGI Symbol;Acc:MGI:97858]
MGP_C57BL6NJ_G0027808	Glmp	NCU-G1	glycosylated lysosomal membrane protein [Source:MGI Symbol;Acc:MGI:1913318]
MGP_C57BL6NJ_G0027803	Mef2d	SRF	myocyte enhancer factor 2D [Source:MGI Symbol;Acc:MGI:99533]
MGP_C57BL6NJ_G0019417	Tbx21	T-box	T-box 21 [Source:MGI Symbol;Acc:MGI:1888984]
MGP_C57BL6NJ_G0034746	Tcf25	Others	transcription factor 25 (basic helix-loop-helix) [Source:MGI Symbol;Acc:MGI:1914105]
MGP_C57BL6NJ_G0019604	Meox1	Homeobox	mesenchyme homeobox 1 [Source:MGI Symbol;Acc:MGI:103220]
MGP_C57BL6NJ_G0020146	Nkx2-1	Homeobox	NK2 homeobox 1 [Source:MGI Symbol;Acc:MGI:108067]
MGP_C57BL6NJ_G0020148	Pax9	PAX	paired box 9 [Source:MGI Symbol;Acc:MGI:97493]
MGP_C57BL6NJ_G0021130	Irx2	Homeobox	Iroquois homeobox 2 [Source:MGI Symbol;Acc:MGI:1197526]
MGP_C57BL6NJ_G0019370	Dlx3	Homeobox	distal-less homeobox 3 [Source:MGI Symbol;Acc:MGI:94903]
MGP_C57BL6NJ_G0031759	Foxm1	Fork_head	forkhead box M1 [Source:MGI Symbol;Acc:MGI:1347487]
MGP_C57BL6NJ_G0031757	Tulp3	Tub	tubby-like protein 3 [Source:MGI Symbol;Acc:MGI:1329045]
MGP_C57BL6NJ_G0029806	Mnx1	Homeobox	motor neuron and pancreas homeobox 1 [Source:MGI Symbol;Acc:MGI:109160]
MGP_C57BL6NJ_G0022839	Hoxc13	Homeobox	homeobox C13 [Source:MGI Symbol;Acc:MGI:99560]
MGP_C57BL6NJ_G0022841	Hoxc11	Homeobox	homeobox C11 [Source:MGI Symbol;Acc:MGI:96193]
MGP_C57BL6NJ_G0022845	Hoxc8	Homeobox	homeobox C8 [Source:MGI Symbol;Acc:MGI:96198]
MGP_C57BL6NJ_G0022846	Hoxc6	Homeobox	homeobox C6 [Source:MGI Symbol;Acc:MGI:96197]
MGP_C57BL6NJ_G0026263	Evx2	Homeobox	even-skipped homeobox 2 [Source:MGI Symbol;Acc:MGI:95462]
MGP_C57BL6NJ_G0026264	Hoxd13	Homeobox	homeobox D13 [Source:MGI Symbol;Acc:MGI:96205]
MGP_C57BL6NJ_G0026265	Hoxd12	Homeobox	homeobox D12 [Source:MGI Symbol;Acc:MGI:96204]
MGP_C57BL6NJ_G0034363	Nfix	CTF/NFI	nuclear factor I/X [Source:MGI Symbol;Acc:MGI:97311]
MGP_C57BL6NJ_G0032156	Npas1	bHLH	neuronal PAS domain protein 1 [Source:MGI Symbol;Acc:MGI:109205]
MGP_C57BL6NJ_G0019169	Foxn1	Fork_head	forkhead box N1 [Source:MGI Symbol;Acc:MGI:102949]
MGP_C57BL6NJ_G0026565	Nr1h3	THR-like	nuclear receptor subfamily 1, group H, member 3 [Source:MGI Symbol;Acc:MGI:1352462]
MGP_C57BL6NJ_G0026562	Spi1	ETS	spleen focus forming virus (SFFV) proviral integration oncogene [Source:MGI Symbol;Acc:MGI:98282]
MGP_C57BL6NJ_G0018222	Stat6	STAT	signal transducer and activator of transcription 6 [Source:MGI Symbol;Acc:MGI:103034]
MGP_C57BL6NJ_G0023844	Tead3	TEA	TEA domain family member 3 [Source:MGI Symbol;Acc:MGI:109241]
MGP_C57BL6NJ_G0023841	Ppard	THR-like	peroxisome proliferator activator receptor delta [Source:MGI Symbol;Acc:MGI:101884]
MGP_C57BL6NJ_G0032059	Peg3	zf-C2H2	paternally expressed 3 [Source:MGI Symbol;Acc:MGI:104748]
MGP_C57BL6NJ_G0032058	Zim1	zf-C2H2	zinc finger, imprinted 1 [Source:MGI Symbol;Acc:MGI:1341879]
MGP_C57BL6NJ_G0021756	Irf9	IRF	interferon regulatory factor 9 [Source:MGI Symbol;Acc:MGI:107587]
MGP_C57BL6NJ_G0034238	Nr2f6	RXR-like	nuclear receptor subfamily 2, group F, member 6 [Source:MGI Symbol;Acc:MGI:1352453]
MGP_C57BL6NJ_G0018269	Ikzf4	zf-C2H2	IKAROS family zinc finger 4 [Source:MGI Symbol;Acc:MGI:1343139]
MGP_C57BL6NJ_G0023660	Zfp40	zf-C2H2	zinc finger protein 40 [Source:MGI Symbol;Acc:MGI:99185]
MGP_C57BL6NJ_G0032234	Relb	RHD	avian reticuloendotheliosis viral (v-rel) oncogene related B [Source:MGI Symbol;Acc:MGI:103289]
MGP_C57BL6NJ_G0020058	Hbp1	HMG	high mobility group box transcription factor 1 [Source:MGI Symbol;Acc:MGI:894659]
MGP_C57BL6NJ_G0028727	Klf4	zf-C2H2	Kruppel-like factor 4 (gut) [Source:MGI Symbol;Acc:MGI:1342287]
MGP_C57BL6NJ_G0016923	Elf3	ETS	E74-like factor 3 [Source:MGI Symbol;Acc:MGI:1101781]
MGP_C57BL6NJ_G0031671	Foxj2	Fork_head	forkhead box J2 [Source:MGI Symbol;Acc:MGI:1926805]
MGP_C57BL6NJ_G0032675	Irf3	IRF	interferon regulatory factor 3 [Source:MGI Symbol;Acc:MGI:1859179]
MGP_C57BL6NJ_G0024305	Zfp959	zf-C2H2	zinc finger protein 959 [Source:MGI Symbol;Acc:MGI:2385058]
MGP_C57BL6NJ_G0028439	Plag1	zf-C2H2	pleiomorphic adenoma gene 1 [Source:MGI Symbol;Acc:MGI:1891916]
MGP_C57BL6NJ_G0027783	Etv3	ETS	ets variant 3 [Source:MGI Symbol;Acc:MGI:1350926]
MGP_C57BL6NJ_G0032217	Fosb	TF_bZIP	FBJ osteosarcoma oncogene B [Source:MGI Symbol;Acc:MGI:95575]
MGP_C57BL6NJ_G0034592	Nfat5	RHD	nuclear factor of activated T cells 5 [Source:MGI Symbol;Acc:MGI:1859333]
MGP_C57BL6NJ_G0017737	Tfam	HMG	transcription factor A, mitochondrial [Source:MGI Symbol;Acc:MGI:107810]
MGP_C57BL6NJ_G0023933	Zfp81	zf-C2H2	zinc finger protein 81 [Source:MGI Symbol;Acc:MGI:1890752]
MGP_C57BL6NJ_G0019331	Hlf	TF_bZIP	hepatic leukemia factor [Source:MGI Symbol;Acc:MGI:96108]
MGP_C57BL6NJ_G0019564	Stat3	STAT	signal transducer and activator of transcription 3 [Source:MGI Symbol;Acc:MGI:103038]
MGP_C57BL6NJ_G0019563	Stat5a	STAT	signal transducer and activator of transcription 5A [Source:MGI Symbol;Acc:MGI:103036]
MGP_C57BL6NJ_G0022888	Cdip1	zf-LITAF-like	cell death inducing Trp53 target 1 [Source:MGI Symbol;Acc:MGI:1913876]
MGP_C57BL6NJ_G0020089	Etv1	ETS	ets variant 1 [Source:MGI Symbol;Acc:MGI:99254]
MGP_C57BL6NJ_G0025590	Pax2	PAX	paired box 2 [Source:MGI Symbol;Acc:MGI:97486]
MGP_C57BL6NJ_G0032173	Hif3a	bHLH	hypoxia inducible factor 3, alpha subunit [Source:MGI Symbol;Acc:MGI:1859778]
MGP_C57BL6NJ_G0018029	Spic	ETS	Spi-C transcription factor (Spi-1/PU.1 related) [Source:MGI Symbol;Acc:MGI:1341168]
MGP_C57BL6NJ_G0032100	Zfp324	zf-C2H2	zinc finger protein 324 [Source:MGI Symbol;Acc:MGI:2444641]
MGP_C57BL6NJ_G0031189	Tax1bp1	Others	Tax1 (human T cell leukemia virus type I) binding protein 1 [Source:MGI Symbol;Acc:MGI:1289308]
MGP_C57BL6NJ_G0035371	Arid3b	ARID	AT rich interactive domain 3B (BRIGHT-like) [Source:MGI Symbol;Acc:MGI:1930768]
MGP_C57BL6NJ_G0023362	Pou1f1	Pou	POU domain, class 1, transcription factor 1 [Source:MGI Symbol;Acc:MGI:97588]
MGP_C57BL6NJ_G0016587	Pax3	PAX	paired box 3 [Source:MGI Symbol;Acc:MGI:97487]
MGP_C57BL6NJ_G0017932	Pias4	zf-MIZ	protein inhibitor of activated STAT 4 [Source:MGI Symbol;Acc:MGI:2136940]
MGP_C57BL6NJ_G0022022	Klf5	zf-C2H2	Kruppel-like factor 5 [Source:MGI Symbol;Acc:MGI:1338056]
MGP_C57BL6NJ_G0018852	Zfp287	zf-C2H2	zinc finger protein 287 [Source:MGI Symbol;Acc:MGI:2176561]
MGP_C57BL6NJ_G0030605	Mlxipl	bHLH	MLX interacting protein-like [Source:MGI Symbol;Acc:MGI:1927999]
MGP_C57BL6NJ_G0032307	Cic	HMG	capicua transcriptional repressor [Source:MGI Symbol;Acc:MGI:1918972]
MGP_C57BL6NJ_G0031187	Evx1	Homeobox	even-skipped homeobox 1 [Source:MGI Symbol;Acc:MGI:95461]
MGP_C57BL6NJ_G0021180	Mef2c	SRF	myocyte enhancer factor 2C [Source:MGI Symbol;Acc:MGI:99458]
MGP_C57BL6NJ_G0032906	Zfp592	zf-C2H2	zinc finger protein 592 [Source:MGI Symbol;Acc:MGI:2443541]
MGP_C57BL6NJ_G0017147	Nr1i3	THR-like	nuclear receptor subfamily 1, group I, member 3 [Source:MGI Symbol;Acc:MGI:1346307]
MGP_C57BL6NJ_G0034546	Ctcf	zf-C2H2	CCCTC-binding factor [Source:MGI Symbol;Acc:MGI:109447]
MGP_C57BL6NJ_G0022880	Tfap4	bHLH	transcription factor AP4 [Source:MGI Symbol;Acc:MGI:103239]
MGP_C57BL6NJ_G0027981	Rfx5	RFX	regulatory factor X, 5 (influences HLA class II expression) [Source:MGI Symbol;Acc:MGI:1858421]
MGP_C57BL6NJ_G0024558	Gata6	zf-GATA	GATA binding protein 6 [Source:MGI Symbol;Acc:MGI:107516]
MGP_C57BL6NJ_G0031494	Nr2c2	RXR-like	nuclear receptor subfamily 2, group C, member 2 [Source:MGI Symbol;Acc:MGI:1352466]
MGP_C57BL6NJ_G0018060	Nr2c1	RXR-like	nuclear receptor subfamily 2, group C, member 1 [Source:MGI Symbol;Acc:MGI:1352465]
MGP_C57BL6NJ_G0018468	Otx1	TF_Otx	orthodenticle homeobox 1 [Source:MGI Symbol;Acc:MGI:97450]
MGP_C57BL6NJ_G0036153	Rhox6	Homeobox	reproductive homeobox 6 [Source:MGI Symbol;Acc:MGI:1202888]
MGP_C57BL6NJ_G0029473	Zbtb17	ZBTB	zinc finger and BTB domain containing 17 [Source:MGI Symbol;Acc:MGI:107410]
MGP_C57BL6NJ_G0025699	Vax1	Homeobox	ventral anterior homeobox 1 [Source:MGI Symbol;Acc:MGI:1277163]
MGP_C57BL6NJ_G0032482	Zbtb32	ZBTB	zinc finger and BTB domain containing 32 [Source:MGI Symbol;Acc:MGI:1891838]
MGP_C57BL6NJ_G0032485	Etv2	ETS	ets variant 2 [Source:MGI Symbol;Acc:MGI:99253]
MGP_C57BL6NJ_G0034720	Snai3	zf-C2H2	snail family zinc finger 3 [Source:MGI Symbol;Acc:MGI:1353563]
MGP_C57BL6NJ_G0029834	Tcf23	bHLH	transcription factor 23 [Source:MGI Symbol;Acc:MGI:1934960]
MGP_C57BL6NJ_G0023896	Pknox1	Homeobox	Pbx/knotted 1 homeobox [Source:MGI Symbol;Acc:MGI:1201409]
MGP_C57BL6NJ_G0020689	Zfp184	zf-C2H2	zinc finger protein 184 (Kruppel-like) [Source:MGI Symbol;Acc:MGI:1922244]
MGP_C57BL6NJ_G0031138	Zfp775	zf-C2H2	zinc finger protein 775 [Source:MGI Symbol;Acc:MGI:2683557]
MGP_C57BL6NJ_G0029691	Gatad1	zf-GATA	GATA zinc finger domain containing 1 [Source:MGI Symbol;Acc:MGI:1914460]
MGP_C57BL6NJ_G0024354	Khsrp	Others	KH-type splicing regulatory protein [Source:MGI Symbol;Acc:MGI:1336214]
MGP_C57BL6NJ_G0016709	Twist2	bHLH	twist basic helix-loop-helix transcription factor 2 [Source:MGI Symbol;Acc:MGI:104685]
MGP_C57BL6NJ_G0030795	Zfp655	zf-C2H2	zinc finger protein 655 [Source:MGI Symbol;Acc:MGI:1919861]
MGP_C57BL6NJ_G0021450	Zmiz1	zf-MIZ	zinc finger, MIZ-type containing 1 [Source:MGI Symbol;Acc:MGI:3040693]
MGP_C57BL6NJ_G0029384	Id3	bHLH	inhibitor of DNA binding 3 [Source:MGI Symbol;Acc:MGI:96398]
MGP_C57BL6NJ_G0029328	Arid1a	ARID	AT rich interactive domain 1A (SWI-like) [Source:MGI Symbol;Acc:MGI:1935147]
MGP_C57BL6NJ_G0033071	Phox2a	Homeobox	paired-like homeobox 2a [Source:MGI Symbol;Acc:MGI:106633]
MGP_C57BL6NJ_G0032650	Spib	ETS	Spi-B transcription factor (Spi-1/PU.1 related) [Source:MGI Symbol;Acc:MGI:892986]
MGP_C57BL6NJ_G0022912	Carhsp1	CSD	calcium regulated heat stable protein 1 [Source:MGI Symbol;Acc:MGI:1196368]
MGP_C57BL6NJ_G0018048	Elk3	ETS	ELK3, member of ETS oncogene family [Source:MGI Symbol;Acc:MGI:101762]
MGP_C57BL6NJ_G0032302	Pou2f2	Pou	POU domain, class 2, transcription factor 2 [Source:MGI Symbol;Acc:MGI:101897]
MGP_C57BL6NJ_G0028818	Nfib	CTF/NFI	nuclear factor I/B [Source:MGI Symbol;Acc:MGI:103188]
MGP_C57BL6NJ_G0023387	Gabpa	ETS	GA repeat binding protein, alpha [Source:MGI Symbol;Acc:MGI:95610]
MGP_C57BL6NJ_G0023029	Tbx1	T-box	T-box 1 [Source:MGI Symbol;Acc:MGI:98493]
MGP_C57BL6NJ_G0033759	Ascl2	bHLH	achaete-scute family bHLH transcription factor 2 [Source:MGI Symbol;Acc:MGI:96920]
MGP_C57BL6NJ_G0036107	Elk1	ETS	ELK1, member of ETS oncogene family [Source:MGI Symbol;Acc:MGI:101833]
MGP_C57BL6NJ_G0032746	Myod1	bHLH	myogenic differentiation 1 [Source:MGI Symbol;Acc:MGI:97275]
MGP_C57BL6NJ_G0022768	Tfcp2	CP2	transcription factor CP2 [Source:MGI Symbol;Acc:MGI:98509]
MGP_C57BL6NJ_G0020642	Pou6f2	Pou	POU domain, class 6, transcription factor 2 [Source:MGI Symbol;Acc:MGI:2443631]
MGP_C57BL6NJ_G0022769	Pou6f1	Pou	POU domain, class 6, transcription factor 1 [Source:MGI Symbol;Acc:MGI:102935]
MGP_C57BL6NJ_G0035878	Ubp1	CP2	upstream binding protein 1 [Source:MGI Symbol;Acc:MGI:104889]
MGP_C57BL6NJ_G0017331	Prox1	HPD	prospero homeobox 1 [Source:MGI Symbol;Acc:MGI:97772]
MGP_C57BL6NJ_G0033632	Ebf3	COE	early B cell factor 3 [Source:MGI Symbol;Acc:MGI:894289]
MGP_C57BL6NJ_G0027457	Myt1	zf-C2HC	myelin transcription factor 1 [Source:MGI Symbol;Acc:MGI:1100535]
MGP_C57BL6NJ_G0032232	Zfp296	zf-C2H2	zinc finger protein 296 [Source:MGI Symbol;Acc:MGI:1926956]
MGP_C57BL6NJ_G0032293	Dmrtc2	DM	doublesex and mab-3 related transcription factor like family C2 [Source:MGI Symbol;Acc:MGI:1918491]
MGP_C57BL6NJ_G0032437	Zfp790	zf-C2H2	zinc finger protein 790 [Source:MGI Symbol;Acc:MGI:1923431]
MGP_C57BL6NJ_G0026623	Ehf	ETS	ets homologous factor [Source:MGI Symbol;Acc:MGI:1270840]
MGP_C57BL6NJ_G0031669	Nanog	Homeobox	Nanog homeobox [Source:MGI Symbol;Acc:MGI:1919200]
MGP_C57BL6NJ_G0030023	Phox2b	Homeobox	paired-like homeobox 2b [Source:MGI Symbol;Acc:MGI:1100882]
MGP_C57BL6NJ_G0032591	Zfp715	zf-C2H2	zinc finger protein 715 [Source:MGI Symbol;Acc:MGI:1917180]
MGP_C57BL6NJ_G0023085	Etv5	ETS	ets variant 5 [Source:MGI Symbol;Acc:MGI:1096867]
MGP_C57BL6NJ_G0035948	Zfp651	ZBTB	zinc finger protein 651 [Source:MGI Symbol;Acc:MGI:2670992]
MGP_C57BL6NJ_G0028653	Pax5	PAX	paired box 5 [Source:MGI Symbol;Acc:MGI:97489]
MGP_C57BL6NJ_G0023511	Prdm15	zf-C2H2	PR domain containing 15 [Source:MGI Symbol;Acc:MGI:1930121]
MGP_C57BL6NJ_G0022881	Glis2	zf-C2H2	GLIS family zinc finger 2 [Source:MGI Symbol;Acc:MGI:1932535]
MGP_C57BL6NJ_G0029589	Camta1	CG-1	calmodulin binding transcription activator 1 [Source:MGI Symbol;Acc:MGI:2140230]
MGP_C57BL6NJ_G0028167	Alx3	Homeobox	aristaless-like homeobox 3 [Source:MGI Symbol;Acc:MGI:1277097]
MGP_C57BL6NJ_G0031175	Hoxa2	Homeobox	homeobox A2 [Source:MGI Symbol;Acc:MGI:96174]
MGP_C57BL6NJ_G0034531	E2f4	E2F	E2F transcription factor 4 [Source:MGI Symbol;Acc:MGI:103012]
MGP_C57BL6NJ_G0031443	Gata2	zf-GATA	GATA binding protein 2 [Source:MGI Symbol;Acc:MGI:95662]
MGP_C57BL6NJ_G0036284	Hmgb3	HMG	high mobility group box 3 [Source:MGI Symbol;Acc:MGI:1098219]
MGP_C57BL6NJ_G0023992	Atf6b	TF_bZIP	activating transcription factor 6 beta [Source:MGI Symbol;Acc:MGI:105121]
MGP_C57BL6NJ_G0017424	Hivep2	zf-C2H2	human immunodeficiency virus type I enhancer binding protein 2 [Source:MGI Symbol;Acc:MGI:1338076]
MGP_C57BL6NJ_G0028003	Arnt	bHLH	aryl hydrocarbon receptor nuclear translocator [Source:MGI Symbol;Acc:MGI:88071]
MGP_C57BL6NJ_G0023811	Nkx2-5	Homeobox	NK2 homeobox 5 [Source:MGI Symbol;Acc:MGI:97350]
MGP_C57BL6NJ_G0024218	Zfp318	Others	zinc finger protein 318 [Source:MGI Symbol;Acc:MGI:1889348]
MGP_C57BL6NJ_G0024225	Srf	SRF	serum response factor [Source:MGI Symbol;Acc:MGI:106658]
MGP_C57BL6NJ_G0025748	Gata3	zf-GATA	GATA binding protein 3 [Source:MGI Symbol;Acc:MGI:95663]
MGP_C57BL6NJ_G0027414	Gata5	zf-GATA	GATA binding protein 5 [Source:MGI Symbol;Acc:MGI:109497]
MGP_C57BL6NJ_G0032939	Arnt2	bHLH	aryl hydrocarbon receptor nuclear translocator 2 [Source:MGI Symbol;Acc:MGI:107188]
MGP_C57BL6NJ_G0026276	Nfe2l2	TF_bZIP	nuclear factor, erythroid derived 2, like 2 [Source:MGI Symbol;Acc:MGI:108420]
MGP_C57BL6NJ_G0017118	Rxrg	RXR-like	retinoid X receptor gamma [Source:MGI Symbol;Acc:MGI:98216]
MGP_C57BL6NJ_G0025933	Rxra	RXR-like	retinoid X receptor alpha [Source:MGI Symbol;Acc:MGI:98214]
MGP_C57BL6NJ_G0029968	Lcorl	HTH	ligand dependent nuclear receptor corepressor-like [Source:MGI Symbol;Acc:MGI:2651932]
MGP_C57BL6NJ_G0030584	Gtf2ird2	GTF2I	GTF2I repeat domain containing 2 [Source:MGI Symbol;Acc:MGI:2149780]
MGP_C57BL6NJ_G0035015	Fli1	ETS	Friend leukemia integration 1 [Source:MGI Symbol;Acc:MGI:95554]
MGP_C57BL6NJ_G0026648	Wt1	zf-C2H2	Wilms tumor 1 homolog [Source:MGI Symbol;Acc:MGI:98968]
MGP_C57BL6NJ_G0020797	E2f3	E2F	E2F transcription factor 3 [Source:MGI Symbol;Acc:MGI:1096340]
MGP_C57BL6NJ_G0030818	Gtf3a	zf-C2H2	general transcription factor III A [Source:MGI Symbol;Acc:MGI:1913846]
MGP_C57BL6NJ_G0021695	Tox4	HMG	TOX high mobility group box family member 4 [Source:MGI Symbol;Acc:MGI:1915389]
MGP_C57BL6NJ_G0027273	Rbpjl	CSL	recombination signal binding protein for immunoglobulin kappa J region-like [Source:MGI Symbol;Acc:MGI:1196616]
MGP_C57BL6NJ_G0019204	Zfp207	Others	zinc finger protein 207 [Source:MGI Symbol;Acc:MGI:1340045]
MGP_C57BL6NJ_G0021401	Rarb	THR-like	retinoic acid receptor, beta [Source:MGI Symbol;Acc:MGI:97857]
MGP_C57BL6NJ_G0027315	Zfp334	zf-C2H2	zinc finger protein 334 [Source:MGI Symbol;Acc:MGI:2388656]
MGP_C57BL6NJ_G0027461	Hnf4g	RXR-like	hepatocyte nuclear factor 4, gamma [Source:MGI Symbol;Acc:MGI:1353604]
MGP_C57BL6NJ_G0019603	Etv4	ETS	ets variant 4 [Source:MGI Symbol;Acc:MGI:99423]
MGP_C57BL6NJ_G0019570	Mlx	bHLH	MAX-like protein X [Source:MGI Symbol;Acc:MGI:108398]
MGP_C57BL6NJ_G0027240	Mybl2	MYB	myeloblastosis oncogene-like 2 [Source:MGI Symbol;Acc:MGI:101785]
MGP_C57BL6NJ_G0027248	Hnf4a	RXR-like	hepatic nuclear factor 4, alpha [Source:MGI Symbol;Acc:MGI:109128]
MGP_C57BL6NJ_G0030721	Mafk	TF_bZIP	v-maf musculoaponeurotic fibrosarcoma oncogene family, protein K (avian) [Source:MGI Symbol;Acc:MGI:99951]
MGP_C57BL6NJ_G0019456	Ikzf3	zf-C2H2	IKAROS family zinc finger 3 [Source:MGI Symbol;Acc:MGI:1342542]
MGP_C57BL6NJ_G0030429	Tbx5	T-box	T-box 5 [Source:MGI Symbol;Acc:MGI:102541]
MGP_C57BL6NJ_G0018870	Zkscan6	zf-C2H2	zinc finger with KRAB and SCAN domains 6 [Source:MGI Symbol;Acc:MGI:1289293]
MGP_C57BL6NJ_G0019313	Vezf1	zf-C2H2	vascular endothelial zinc finger 1 [Source:MGI Symbol;Acc:MGI:1313291]
MGP_C57BL6NJ_G0018845	Ncor1	MYB	nuclear receptor co-repressor 1 [Source:MGI Symbol;Acc:MGI:1349717]
MGP_C57BL6NJ_G0018961	Ybx2	CSD	Y box protein 2 [Source:MGI Symbol;Acc:MGI:1096372]
MGP_C57BL6NJ_G0030428	Tbx3	T-box	T-box 3 [Source:MGI Symbol;Acc:MGI:98495]
MGP_C57BL6NJ_G0019258	Tada2a	MYB	transcriptional adaptor 2A [Source:MGI Symbol;Acc:MGI:2144471]
MGP_C57BL6NJ_G0018438	Ikzf1	zf-C2H2	IKAROS family zinc finger 1 [Source:MGI Symbol;Acc:MGI:1342540]
MGP_C57BL6NJ_G0019411	Sp2	zf-C2H2	Sp2 transcription factor [Source:MGI Symbol;Acc:MGI:1926162]
MGP_C57BL6NJ_G0019262	Lhx1	Homeobox	LIM homeobox protein 1 [Source:MGI Symbol;Acc:MGI:99783]
MGP_C57BL6NJ_G0018944	Zbtb4	ZBTB	zinc finger and BTB domain containing 4 [Source:MGI Symbol;Acc:MGI:1922830]
MGP_C57BL6NJ_G0018696	Irf1	IRF	interferon regulatory factor 1 [Source:MGI Symbol;Acc:MGI:96590]
MGP_C57BL6NJ_G0019402	Hoxb1	Homeobox	homeobox B1 [Source:MGI Symbol;Acc:MGI:96182]
MGP_C57BL6NJ_G0029385	E2f2	E2F	E2F transcription factor 2 [Source:MGI Symbol;Acc:MGI:1096341]
MGP_C57BL6NJ_G0016952	Lhx9	Homeobox	LIM homeobox protein 9 [Source:MGI Symbol;Acc:MGI:1316721]
MGP_C57BL6NJ_G0020075	Ahr	bHLH	aryl-hydrocarbon receptor [Source:MGI Symbol;Acc:MGI:105043]
MGP_C57BL6NJ_G0027983	Zfp687	zf-C2H2	zinc finger protein 687 [Source:MGI Symbol;Acc:MGI:1925516]
MGP_C57BL6NJ_G0017866	Arid3a	ARID	AT rich interactive domain 3A (BRIGHT-like) [Source:MGI Symbol;Acc:MGI:1328360]
MGP_C57BL6NJ_G0017380	Esr1	ESR-like	estrogen receptor 1 (alpha) [Source:MGI Symbol;Acc:MGI:1352467]
MGP_C57BL6NJ_G0017517	Hey2	bHLH	hairy/enhancer-of-split related with YRPW motif 2 [Source:MGI Symbol;Acc:MGI:1341884]
MGP_C57BL6NJ_G0017584	Nr2e1	RXR-like	nuclear receptor subfamily 2, group E, member 1 [Source:MGI Symbol;Acc:MGI:1100526]
MGP_C57BL6NJ_G0017416	Plagl1	zf-C2H2	pleiomorphic adenoma gene-like 1 [Source:MGI Symbol;Acc:MGI:1100874]
MGP_C57BL6NJ_G0017570	Zbtb24	ZBTB	zinc finger and BTB domain containing 24 [Source:MGI Symbol;Acc:MGI:3039618]
MGP_C57BL6NJ_G0017634	Hsf2	HSF	heat shock factor 2 [Source:MGI Symbol;Acc:MGI:96239]
MGP_C57BL6NJ_G0017614	Rfx6	RFX	regulatory factor X, 6 [Source:MGI Symbol;Acc:MGI:2445208]
MGP_C57BL6NJ_G0017608	Sim1	bHLH	single-minded family bHLH transcription factor 1 [Source:MGI Symbol;Acc:MGI:98306]
MGP_C57BL6NJ_G0017724	Arid5b	ARID	AT rich interactive domain 5B (MRF1-like) [Source:MGI Symbol;Acc:MGI:2175912]
MGP_C57BL6NJ_G0017456	Myb	MYB	myeloblastosis oncogene [Source:MGI Symbol;Acc:MGI:97249]
MGP_C57BL6NJ_G0017994	Rfx4	RFX	regulatory factor X, 4 (influences HLA class II expression) [Source:MGI Symbol;Acc:MGI:1918387]
MGP_C57BL6NJ_G0018017	Ascl1	bHLH	achaete-scute family bHLH transcription factor 1 [Source:MGI Symbol;Acc:MGI:96919]
MGP_C57BL6NJ_G0018447	Plek	Others	pleckstrin [Source:MGI Symbol;Acc:MGI:1860485]
MGP_C57BL6NJ_G0018133	Thap2	THAP	THAP domain containing, apoptosis associated protein 2 [Source:MGI Symbol;Acc:MGI:1914066]
MGP_C57BL6NJ_G0018454	Meis1	Homeobox	Meis homeobox 1 [Source:MGI Symbol;Acc:MGI:104717]
MGP_C57BL6NJ_G0017897	Tcf3	bHLH	transcription factor 3 [Source:MGI Symbol;Acc:MGI:98510]
MGP_C57BL6NJ_G0018150	Yeats4	Others	YEATS domain containing 4 [Source:MGI Symbol;Acc:MGI:1927224]
MGP_C57BL6NJ_G0018114	E2f7	E2F	E2F transcription factor 7 [Source:MGI Symbol;Acc:MGI:1289147]
MGP_C57BL6NJ_G0017947	Hmg20b	HMG	high mobility group 20B [Source:MGI Symbol;Acc:MGI:1341190]
MGP_C57BL6NJ_G0017980	Nfyb	NF-YB	nuclear transcription factor-Y beta [Source:MGI Symbol;Acc:MGI:97317]
MGP_C57BL6NJ_G0018485	Rel	RHD	reticuloendotheliosis oncogene [Source:MGI Symbol;Acc:MGI:97897]
MGP_C57BL6NJ_G0018646	Zfp354b	zf-C2H2	zinc finger protein 354B [Source:MGI Symbol;Acc:MGI:1351476]
MGP_C57BL6NJ_G0018653	Zfp354a	zf-C2H2	zinc finger protein 354A [Source:MGI Symbol;Acc:MGI:103172]
MGP_C57BL6NJ_G0032374	Zfp607a	zf-C2H2	zinc finger protein 607A [Source:MGI Symbol;Acc:MGI:3584526]
MGP_C57BL6NJ_G0018348	Patz1	ZBTB	POZ (BTB) and AT hook containing zinc finger 1 [Source:MGI Symbol;Acc:MGI:1891832]
MGP_C57BL6NJ_G0018792	Zkscan17	zf-C2H2	zinc finger with KRAB and SCAN domains 17 [Source:MGI Symbol;Acc:MGI:2679270]
MGP_C57BL6NJ_G0018394	Xbp1	TF_bZIP	X-box binding protein 1 [Source:MGI Symbol;Acc:MGI:98970]
MGP_C57BL6NJ_G0018771	2810021J22Rik	zf-C2H2	RIKEN cDNA 2810021J22 gene [Source:MGI Symbol;Acc:MGI:1917194]
MGP_C57BL6NJ_G0018805	Srebf1	bHLH	sterol regulatory element binding transcription factor 1 [Source:MGI Symbol;Acc:MGI:107606]
MGP_C57BL6NJ_G0020027	Id2	bHLH	inhibitor of DNA binding 2 [Source:MGI Symbol;Acc:MGI:96397]
MGP_C57BL6NJ_G0019958	Ncoa1	bHLH	nuclear receptor coactivator 1 [Source:MGI Symbol;Acc:MGI:1276523]
MGP_C57BL6NJ_G0020022	Klf11	zf-C2H2	Kruppel-like factor 11 [Source:MGI Symbol;Acc:MGI:2653368]
MGP_C57BL6NJ_G0020021	Grhl1	CP2	grainyhead like transcription factor 1 [Source:MGI Symbol;Acc:MGI:2182540]
MGP_C57BL6NJ_G0019254	Hnf1b	Homeobox	HNF1 homeobox B [Source:MGI Symbol;Acc:MGI:98505]
MGP_C57BL6NJ_G0019339	Nme2	Others	NME/NM23 nucleoside diphosphate kinase 2 [Source:MGI Symbol;Acc:MGI:97356]
MGP_C57BL6NJ_G0019371	Dlx4	Homeobox	distal-less homeobox 4 [Source:MGI Symbol;Acc:MGI:94904]
MGP_C57BL6NJ_G0019394	Hoxb9	Homeobox	homeobox B9 [Source:MGI Symbol;Acc:MGI:96190]
MGP_C57BL6NJ_G0019465	Nr1d1	THR-like	nuclear receptor subfamily 1, group D, member 1 [Source:MGI Symbol;Acc:MGI:2444210]
MGP_C57BL6NJ_G0019562	Stat5b	STAT	signal transducer and activator of transcription 5B [Source:MGI Symbol;Acc:MGI:103035]
MGP_C57BL6NJ_G0019622	Ubtf	HMG	upstream binding transcription factor, RNA polymerase I [Source:MGI Symbol;Acc:MGI:98512]
MGP_C57BL6NJ_G0020104	Foxg1	Fork_head	forkhead box G1 [Source:MGI Symbol;Acc:MGI:1347464]
MGP_C57BL6NJ_G0020122	Npas3	bHLH	neuronal PAS domain protein 3 [Source:MGI Symbol;Acc:MGI:1351610]
MGP_C57BL6NJ_G0020241	Esr2	ESR-like	estrogen receptor 2 (beta) [Source:MGI Symbol;Acc:MGI:109392]
MGP_C57BL6NJ_G0020463	Gsc	Homeobox	goosecoid homeobox [Source:MGI Symbol;Acc:MGI:95841]
MGP_C57BL6NJ_G0020221	Six6	Homeobox	sine oculis-related homeobox 6 [Source:MGI Symbol;Acc:MGI:1341840]
MGP_C57BL6NJ_G0020230	Hif1a	Others	hypoxia inducible factor 1, alpha subunit [Source:MGI Symbol;Acc:MGI:106918]
MGP_C57BL6NJ_G0020274	Zfp36l1	zf-CCCH	zinc finger protein 36, C3H type-like 1 [Source:MGI Symbol;Acc:MGI:107946]
MGP_C57BL6NJ_G0020557	Mta1	zf-GATA	metastasis associated 1 [Source:MGI Symbol;Acc:MGI:2150037]
MGP_C57BL6NJ_G0032561	Tshz3	zf-C2H2	teashirt zinc finger family member 3 [Source:MGI Symbol;Acc:MGI:2442819]
MGP_C57BL6NJ_G0020328	Vsx2	Homeobox	visual system homeobox 2 [Source:MGI Symbol;Acc:MGI:88401]
MGP_C57BL6NJ_G0020349	Fos	TF_bZIP	FBJ osteosarcoma oncogene [Source:MGI Symbol;Acc:MGI:95574]
MGP_C57BL6NJ_G0020358	Esrrb	ESR-like	estrogen related receptor, beta [Source:MGI Symbol;Acc:MGI:1346832]
MGP_C57BL6NJ_G0020493	Yy1	zf-C2H2	YY1 transcription factor [Source:MGI Symbol;Acc:MGI:99150]
MGP_C57BL6NJ_G0020635	Gli3	zf-C2H2	GLI-Kruppel family member GLI3 [Source:MGI Symbol;Acc:MGI:95729]
MGP_C57BL6NJ_G0020662	Zkscan3	zf-C2H2	zinc finger with KRAB and SCAN domains 3 [Source:MGI Symbol;Acc:MGI:1919989]
MGP_C57BL6NJ_G0020802	Irf4	IRF	interferon regulatory factor 4 [Source:MGI Symbol;Acc:MGI:1096873]
MGP_C57BL6NJ_G0020862	Tfap2a	AP-2	transcription factor AP-2, alpha [Source:MGI Symbol;Acc:MGI:104671]
MGP_C57BL6NJ_G0020867	Gcm2	GCM	glial cells missing homolog 2 [Source:MGI Symbol;Acc:MGI:1861438]
MGP_C57BL6NJ_G0020876	Hivep1	zf-C2H2	human immunodeficiency virus type I enhancer binding protein 1 [Source:MGI Symbol;Acc:MGI:96100]
MGP_C57BL6NJ_G0020905	Id4	bHLH	inhibitor of DNA binding 4 [Source:MGI Symbol;Acc:MGI:99414]
MGP_C57BL6NJ_G0020909	Barx1	Homeobox	BarH-like homeobox 1 [Source:MGI Symbol;Acc:MGI:103124]
MGP_C57BL6NJ_G0020946	Msx2	Homeobox	msh homeobox 2 [Source:MGI Symbol;Acc:MGI:97169]
MGP_C57BL6NJ_G0020975	Mxd3	bHLH	Max dimerization protein 3 [Source:MGI Symbol;Acc:MGI:104987]
MGP_C57BL6NJ_G0020996	Pitx1	Homeobox	paired-like homeodomain transcription factor 1 [Source:MGI Symbol;Acc:MGI:107374]
MGP_C57BL6NJ_G0021106	Zfp729a	zf-C2H2	zinc finger protein 729a [Source:MGI Symbol;Acc:MGI:3036250]
MGP_C57BL6NJ_G0021078	Zfp369	zf-C2H2	zinc finger protein 369 [Source:MGI Symbol;Acc:MGI:2176229]
MGP_C57BL6NJ_G0021007	Smad5	MH1	SMAD family member 5 [Source:MGI Symbol;Acc:MGI:1328787]
MGP_C57BL6NJ_G0021151	Ahrr	bHLH	aryl-hydrocarbon receptor repressor [Source:MGI Symbol;Acc:MGI:1333776]
MGP_C57BL6NJ_G0021131	Irx4	Homeobox	Iroquois homeobox 4 [Source:MGI Symbol;Acc:MGI:1355275]
MGP_C57BL6NJ_G0021222	Otp	Homeobox	orthopedia homeobox [Source:MGI Symbol;Acc:MGI:99835]
MGP_C57BL6NJ_G0021383	Fezf2	zf-C2H2	Fez family zinc finger 2 [Source:MGI Symbol;Acc:MGI:1859823]
MGP_C57BL6NJ_G0021403	Nr1d2	THR-like	nuclear receptor subfamily 1, group D, member 2 [Source:MGI Symbol;Acc:MGI:2449205]
MGP_C57BL6NJ_G0021402	Thrb	THR-like	thyroid hormone receptor beta [Source:MGI Symbol;Acc:MGI:98743]
MGP_C57BL6NJ_G0021614	Otx2	TF_Otx	orthodenticle homeobox 2 [Source:MGI Symbol;Acc:MGI:97451]
MGP_C57BL6NJ_G0021863	Gata4	zf-GATA	GATA binding protein 4 [Source:MGI Symbol;Acc:MGI:95664]
MGP_C57BL6NJ_G0021878	Hmbox1	Homeobox	homeobox containing 1 [Source:MGI Symbol;Acc:MGI:2445066]
MGP_C57BL6NJ_G0021985	Tsc22d1	TSC22	TSC22 domain family, member 1 [Source:MGI Symbol;Acc:MGI:109127]
MGP_C57BL6NJ_G0021907	Ebf2	COE	early B cell factor 2 [Source:MGI Symbol;Acc:MGI:894332]
MGP_C57BL6NJ_G0021919	Nkx3-1	Homeobox	NK3 homeobox 1 [Source:MGI Symbol;Acc:MGI:97352]
MGP_C57BL6NJ_G0022139	Sub1	PC4	SUB1 homolog (S. cerevisiae) [Source:MGI Symbol;Acc:MGI:104811]
MGP_C57BL6NJ_G0020664	Zscan26	zf-C2H2	zinc finger and SCAN domain containing 26 [Source:MGI Symbol;Acc:MGI:3531417]
MGP_C57BL6NJ_G0022207	Grhl2	CP2	grainyhead like transcription factor 2 [Source:MGI Symbol;Acc:MGI:2182543]
MGP_C57BL6NJ_G0022226	Zfpm2	zf-C2H2	zinc finger protein, multitype 2 [Source:MGI Symbol;Acc:MGI:1334444]
MGP_C57BL6NJ_G0022192	Osr2	zf-C2H2	odd-skipped related 2 [Source:MGI Symbol;Acc:MGI:1930813]
MGP_C57BL6NJ_G0022317	Zfat	zf-C2H2	zinc finger and AT hook domain containing [Source:MGI Symbol;Acc:MGI:2681865]
MGP_C57BL6NJ_G0022295	Myc	bHLH	myelocytomatosis oncogene [Source:MGI Symbol;Acc:MGI:97250]
MGP_C57BL6NJ_G0022273	Zhx1	Homeobox	zinc fingers and homeoboxes 1 [Source:MGI Symbol;Acc:MGI:109271]
MGP_C57BL6NJ_G0022604	Ppara	THR-like	peroxisome proliferator activated receptor alpha [Source:MGI Symbol;Acc:MGI:104740]
MGP_C57BL6NJ_G0022530	Tef	TF_bZIP	thyrotroph embryonic factor [Source:MGI Symbol;Acc:MGI:98663]
MGP_C57BL6NJ_G0022544	Srebf2	bHLH	sterol regulatory element binding factor 2 [Source:MGI Symbol;Acc:MGI:107585]
MGP_C57BL6NJ_G0022691	Vdr	THR-like	vitamin D (1,25-dihydroxyvitamin D3) receptor [Source:MGI Symbol;Acc:MGI:103076]
MGP_C57BL6NJ_G0022842	Hoxc10	Homeobox	homeobox C10 [Source:MGI Symbol;Acc:MGI:96192]
MGP_C57BL6NJ_G0022843	Hoxc5	Homeobox	homeobox C5 [Source:MGI Symbol;Acc:MGI:96196]
MGP_C57BL6NJ_G0022933	Litaf	zf-LITAF-like	LPS-induced TN factor [Source:MGI Symbol;Acc:MGI:1929512]
MGP_C57BL6NJ_G0023104	Bcl6	ZBTB	B cell leukemia/lymphoma 6 [Source:MGI Symbol;Acc:MGI:107187]
MGP_C57BL6NJ_G0023107	Trp63	P53	transformation related protein 63 [Source:MGI Symbol;Acc:MGI:1330810]
MGP_C57BL6NJ_G0022420	Zfp251	zf-C2H2	zinc finger protein 251 [Source:MGI Symbol;Acc:MGI:1918841]
MGP_C57BL6NJ_G0023124	Hes1	bHLH	hes family bHLH transcription factor 1 [Source:MGI Symbol;Acc:MGI:104853]
MGP_C57BL6NJ_G0022864	Zfp263	zf-C2H2	zinc finger protein 263 [Source:MGI Symbol;Acc:MGI:1921370]
MGP_C57BL6NJ_G0022394	Maf1	Others	MAF1 homolog, negative regulator of RNA polymerase III [Source:MGI Symbol;Acc:MGI:1916127]
MGP_C57BL6NJ_G0022401	Hsf1	HSF	heat shock factor 1 [Source:MGI Symbol;Acc:MGI:96238]
MGP_C57BL6NJ_G0023299	Zbtb11	ZBTB	zinc finger and BTB domain containing 11 [Source:MGI Symbol;Acc:MGI:2443876]
MGP_C57BL6NJ_G0023290	Bbx	HMG	bobby sox HMG box containing [Source:MGI Symbol;Acc:MGI:1917758]
MGP_C57BL6NJ_G0022963	Snai2	zf-C2H2	snail family zinc finger 2 [Source:MGI Symbol;Acc:MGI:1096393]
MGP_C57BL6NJ_G0023240	Zbtb20	ZBTB	zinc finger and BTB domain containing 20 [Source:MGI Symbol;Acc:MGI:1929213]
MGP_C57BL6NJ_G0023013	Gsc2	Homeobox	goosecoid homebox 2 [Source:MGI Symbol;Acc:MGI:892006]
MGP_C57BL6NJ_G0022998	Thap7	THAP	THAP domain containing 7 [Source:MGI Symbol;Acc:MGI:1916259]
MGP_C57BL6NJ_G0023222	Nr1i2	THR-like	nuclear receptor subfamily 1, group I, member 2 [Source:MGI Symbol;Acc:MGI:1337040]
MGP_C57BL6NJ_G0023171	Zfp148	zf-C2H2	zinc finger protein 148 [Source:MGI Symbol;Acc:MGI:1332234]
MGP_C57BL6NJ_G0023494	Ets2	ETS	E26 avian leukemia oncogene 2, 3' domain [Source:MGI Symbol;Acc:MGI:95456]
MGP_C57BL6NJ_G0023476	Runx1	Runt	runt related transcription factor 1 [Source:MGI Symbol;Acc:MGI:99852]
MGP_C57BL6NJ_G0023463	Son	Others	Son DNA binding protein [Source:MGI Symbol;Acc:MGI:98353]
MGP_C57BL6NJ_G0023450	Paxbp1	GCFC	PAX3 and PAX7 binding protein 1 [Source:MGI Symbol;Acc:MGI:1914617]
MGP_C57BL6NJ_G0022701	Zfp641	zf-C2H2	zinc finger protein 641 [Source:MGI Symbol;Acc:MGI:2442788]
MGP_C57BL6NJ_G0022757	Atf1	TF_bZIP	activating transcription factor 1 [Source:MGI Symbol;Acc:MGI:1298366]
MGP_C57BL6NJ_G0022782	Nr4a1	NGFIB-like	nuclear receptor subfamily 4, group A, member 1 [Source:MGI Symbol;Acc:MGI:1352454]
MGP_C57BL6NJ_G0030587	Gtf2ird1	GTF2I	general transcription factor II I repeat domain-containing 1 [Source:MGI Symbol;Acc:MGI:1861942]
MGP_C57BL6NJ_G0030308	Zfp605	zf-C2H2	zinc finger protein 605 [Source:MGI Symbol;Acc:MGI:2444933]
MGP_C57BL6NJ_G0035547	Gcm1	GCM	glial cells missing homolog 1 [Source:MGI Symbol;Acc:MGI:108045]
MGP_C57BL6NJ_G0026244	Dlx2	Homeobox	distal-less homeobox 2 [Source:MGI Symbol;Acc:MGI:94902]
MGP_C57BL6NJ_G0021774	Nfatc4	RHD	nuclear factor of activated T cells, cytoplasmic, calcineurin dependent 4 [Source:MGI Symbol;Acc:MGI:1920431]
MGP_C57BL6NJ_G0036607	Esx1	Homeobox	extraembryonic, spermatogenesis, homeobox 1 [Source:MGI Symbol;Acc:MGI:1096388]
MGP_C57BL6NJ_G0032709	Tulp2	Tub	tubby-like protein 2 [Source:MGI Symbol;Acc:MGI:1861600]
MGP_C57BL6NJ_G0018912	Hes7	bHLH	hes family bHLH transcription factor 7 [Source:MGI Symbol;Acc:MGI:2135679]
MGP_C57BL6NJ_G0023636	Zfp54	zf-C2H2	zinc finger protein 54 [Source:MGI Symbol;Acc:MGI:99201]
MGP_C57BL6NJ_G0023637	Zfp51	zf-C2H2	zinc finger protein 51 [Source:MGI Symbol;Acc:MGI:99198]
MGP_C57BL6NJ_G0023666	Zscan10	zf-C2H2	zinc finger and SCAN domain containing 10 [Source:MGI Symbol;Acc:MGI:3040700]
MGP_C57BL6NJ_G0024290	Satb1	CUT	special AT-rich sequence binding protein 1 [Source:MGI Symbol;Acc:MGI:105084]
MGP_C57BL6NJ_G0024191	Cdc5l	MYB	cell division cycle 5-like (S. pombe) [Source:MGI Symbol;Acc:MGI:1918952]
MGP_C57BL6NJ_G0024263	Tfeb	bHLH	transcription factor EB [Source:MGI Symbol;Acc:MGI:103270]
MGP_C57BL6NJ_G0024265	Foxp4	Fork_head	forkhead box P4 [Source:MGI Symbol;Acc:MGI:1921373]
MGP_C57BL6NJ_G0024276	Nfya	NF-YA	nuclear transcription factor-Y alpha [Source:MGI Symbol;Acc:MGI:97316]
MGP_C57BL6NJ_G0023908	Wiz	zf-C2H2	widely-interspaced zinc finger motifs [Source:MGI Symbol;Acc:MGI:1332638]
MGP_C57BL6NJ_G0024449	Cebpz	Others	CCAAT/enhancer binding protein zeta [Source:MGI Symbol;Acc:MGI:109386]
MGP_C57BL6NJ_G0024494	Six2	Homeobox	sine oculis-related homeobox 2 [Source:MGI Symbol;Acc:MGI:102778]
MGP_C57BL6NJ_G0023709	E4f1	zf-C2H2	E4F transcription factor 1 [Source:MGI Symbol;Acc:MGI:109530]
MGP_C57BL6NJ_G0024498	Epas1	Others	endothelial PAS domain protein 1 [Source:MGI Symbol;Acc:MGI:109169]
MGP_C57BL6NJ_G0023764	Sox8	HMG	SRY (sex determining region Y)-box 8 [Source:MGI Symbol;Acc:MGI:98370]
MGP_C57BL6NJ_G0024345	Rfx2	RFX	regulatory factor X, 2 (influences HLA class II expression) [Source:MGI Symbol;Acc:MGI:106583]
MGP_C57BL6NJ_G0023831	Spdef	ETS	SAM pointed domain containing ets transcription factor [Source:MGI Symbol;Acc:MGI:1353422]
MGP_C57BL6NJ_G0023839	Zfp523	zf-C2H2	zinc finger protein 523 [Source:MGI Symbol;Acc:MGI:2687278]
MGP_C57BL6NJ_G0024534	Zeb1	zf-C2H2	zinc finger E-box binding homeobox 1 [Source:MGI Symbol;Acc:MGI:1344313]
MGP_C57BL6NJ_G0024601	Zfp397	zf-C2H2	zinc finger protein 397 [Source:MGI Symbol;Acc:MGI:1916506]
MGP_C57BL6NJ_G0023917	Zfp871	zf-C2H2	zinc finger protein 871 [Source:MGI Symbol;Acc:MGI:1921793]
MGP_C57BL6NJ_G0024042	Pou5f1	Pou	POU domain, class 5, transcription factor 1 [Source:MGI Symbol;Acc:MGI:101893]
MGP_C57BL6NJ_G0024572	Zfp521	zf-C2H2	zinc finger protein 521 [Source:MGI Symbol;Acc:MGI:95459]
MGP_C57BL6NJ_G0024777	Nr3c1	ESR-like	nuclear receptor subfamily 3, group C, member 1 [Source:MGI Symbol;Acc:MGI:95824]
MGP_C57BL6NJ_G0024789	Pou4f3	Pou	POU domain, class 4, transcription factor 3 [Source:MGI Symbol;Acc:MGI:102523]
MGP_C57BL6NJ_G0024958	Mbd2	MBD	methyl-CpG binding domain protein 2 [Source:MGI Symbol;Acc:MGI:1333813]
MGP_C57BL6NJ_G0024961	Smad4	MH1	SMAD family member 4 [Source:MGI Symbol;Acc:MGI:894293]
MGP_C57BL6NJ_G0024926	Rax	Homeobox	retina and anterior neural fold homeobox [Source:MGI Symbol;Acc:MGI:109632]
MGP_C57BL6NJ_G0024998	Setbp1	Others	SET binding protein 1 [Source:MGI Symbol;Acc:MGI:1933199]
MGP_C57BL6NJ_G0024969	Mbd1	MBD	methyl-CpG binding domain protein 1 [Source:MGI Symbol;Acc:MGI:1333811]
MGP_C57BL6NJ_G0024980	Smad2	MH1	SMAD family member 2 [Source:MGI Symbol;Acc:MGI:108051]
MGP_C57BL6NJ_G0025011	Sall3	zf-C2H2	spalt like transcription factor 3 [Source:MGI Symbol;Acc:MGI:109295]
MGP_C57BL6NJ_G0024886	Cdx1	Homeobox	caudal type homeobox 1 [Source:MGI Symbol;Acc:MGI:88360]
MGP_C57BL6NJ_G0024889	Hmgxb3	HMG	HMG box domain containing 3 [Source:MGI Symbol;Acc:MGI:2441817]
MGP_C57BL6NJ_G0025337	Zfp91	zf-C2H2	zinc finger protein 91 [Source:MGI Symbol;Acc:MGI:104854]
MGP_C57BL6NJ_G0025419	Dmrt1	DM	doublesex and mab-3 related transcription factor 1 [Source:MGI Symbol;Acc:MGI:1354733]
MGP_C57BL6NJ_G0025119	Fosl1	TF_bZIP	fos-like antigen 1 [Source:MGI Symbol;Acc:MGI:107179]
MGP_C57BL6NJ_G0025128	Ovol1	zf-C2H2	ovo like zinc finger 1 [Source:MGI Symbol;Acc:MGI:1330290]
MGP_C57BL6NJ_G0025132	Rela	RHD	v-rel reticuloendotheliosis viral oncogene homolog A (avian) [Source:MGI Symbol;Acc:MGI:103290]
MGP_C57BL6NJ_G0025182	Esrra	ESR-like	estrogen related receptor, alpha [Source:MGI Symbol;Acc:MGI:1346831]
MGP_C57BL6NJ_G0025201	Rcor2	MYB	REST corepressor 2 [Source:MGI Symbol;Acc:MGI:1859854]
MGP_C57BL6NJ_G0025674	Tcf7l2	HMG	transcription factor 7 like 2, T cell specific, HMG box [Source:MGI Symbol;Acc:MGI:1202879]
MGP_C57BL6NJ_G0025496	Hhex	Homeobox	hematopoietically expressed homeobox [Source:MGI Symbol;Acc:MGI:96086]
MGP_C57BL6NJ_G0025538	Lcor	HTH	ligand dependent nuclear receptor corepressor [Source:MGI Symbol;Acc:MGI:2443930]
MGP_C57BL6NJ_G0025658	Mxi1	bHLH	MAX interactor 1, dimerization protein [Source:MGI Symbol;Acc:MGI:97245]
MGP_C57BL6NJ_G0036389	Nr0b1	Miscellaneous	nuclear receptor subfamily 0, group B, member 1 [Source:MGI Symbol;Acc:MGI:1352460]
MGP_C57BL6NJ_G0032922	Bnc1	zf-C2H2	basonuclin 1 [Source:MGI Symbol;Acc:MGI:1097164]
MGP_C57BL6NJ_G0027504	Bhlhe22	bHLH	basic helix-loop-helix family, member e22 [Source:MGI Symbol;Acc:MGI:1930001]
MGP_C57BL6NJ_G0025599	Tlx1	Homeobox	T cell leukemia, homeobox 1 [Source:MGI Symbol;Acc:MGI:98769]
MGP_C57BL6NJ_G0025600	Lbx1	Homeobox	ladybird homeobox 1 [Source:MGI Symbol;Acc:MGI:104867]
MGP_C57BL6NJ_G0025617	Nfkb2	RHD	nuclear factor of kappa light polypeptide gene enhancer in B cells 2, p49/p100 [Source:MGI Symbol;Acc:MGI:1099800]
MGP_C57BL6NJ_G0025615	Pitx3	Homeobox	paired-like homeodomain transcription factor 3 [Source:MGI Symbol;Acc:MGI:1100498]
MGP_C57BL6NJ_G0027463	Zfhx4	Homeobox	zinc finger homeodomain 4 [Source:MGI Symbol;Acc:MGI:2137668]
MGP_C57BL6NJ_G0020573	Sp4	zf-C2H2	trans-acting transcription factor 4 [Source:MGI Symbol;Acc:MGI:107595]
MGP_C57BL6NJ_G0018260	Smarcc2	MYB	SWI/SNF related, matrix associated, actin dependent regulator of chromatin, subfamily c, member 2 [Source:MGI Symbol;Acc:MGI:1915344]
MGP_C57BL6NJ_G0018213	Gli1	zf-C2H2	GLI-Kruppel family member GLI1 [Source:MGI Symbol;Acc:MGI:95727]
MGP_C57BL6NJ_G0018210	Ddit3	TF_bZIP	DNA-damage inducible transcript 3 [Source:MGI Symbol;Acc:MGI:109247]
MGP_C57BL6NJ_G0024985	Pias2	zf-MIZ	protein inhibitor of activated STAT 2 [Source:MGI Symbol;Acc:MGI:1096566]
MGP_C57BL6NJ_G0033654	Msx3	Homeobox	msh homeobox 3 [Source:MGI Symbol;Acc:MGI:106587]
MGP_C57BL6NJ_G0033653	Zfp511	Others	zinc finger protein 511 [Source:MGI Symbol;Acc:MGI:1917002]
MGP_C57BL6NJ_G0033713	Irf7	IRF	interferon regulatory factor 7 [Source:MGI Symbol;Acc:MGI:1859212]
MGP_C57BL6NJ_G0036530	Zfp711	zf-C2H2	zinc finger protein 711 [Source:MGI Symbol;Acc:MGI:3045342]
MGP_C57BL6NJ_G0032911	Cpeb1	Others	cytoplasmic polyadenylation element binding protein 1 [Source:MGI Symbol;Acc:MGI:108442]
MGP_C57BL6NJ_G0036533	Dach2	DACH	dachshund family transcription factor 2 [Source:MGI Symbol;Acc:MGI:1890446]
MGP_C57BL6NJ_G0035159	Zfp202	zf-C2H2	zinc finger protein 202 [Source:MGI Symbol;Acc:MGI:1933401]
MGP_C57BL6NJ_G0023398	Bach1	TF_bZIP	BTB and CNC homology 1, basic leucine zipper transcription factor 1 [Source:MGI Symbol;Acc:MGI:894680]
MGP_C57BL6NJ_G0031123	Zfp282	zf-C2H2	zinc finger protein 282 [Source:MGI Symbol;Acc:MGI:2141413]
MGP_C57BL6NJ_G0024977	Smad7	MH1	SMAD family member 7 [Source:MGI Symbol;Acc:MGI:1100518]
MGP_C57BL6NJ_G0016199	Sox17	HMG	SRY (sex determining region Y)-box 17 [Source:MGI Symbol;Acc:MGI:107543]
MGP_C57BL6NJ_G0016218	Mybl1	MYB	myeloblastosis oncogene-like 1 [Source:MGI Symbol;Acc:MGI:99925]
MGP_C57BL6NJ_G0016241	Terf1	MYB	telomeric repeat binding factor 1 [Source:MGI Symbol;Acc:MGI:109634]
MGP_C57BL6NJ_G0016259	Tfap2b	AP-2	transcription factor AP-2 beta [Source:MGI Symbol;Acc:MGI:104672]
MGP_C57BL6NJ_G0016238	Msc	bHLH	musculin [Source:MGI Symbol;Acc:MGI:1333884]
MGP_C57BL6NJ_G0016486	Creb1	TF_bZIP	cAMP responsive element binding protein 1 [Source:MGI Symbol;Acc:MGI:88494]
MGP_C57BL6NJ_G0016485	Klf7	zf-C2H2	Kruppel-like factor 7 (ubiquitous) [Source:MGI Symbol;Acc:MGI:1935151]
MGP_C57BL6NJ_G0016512	Ikzf2	zf-C2H2	IKAROS family zinc finger 2 [Source:MGI Symbol;Acc:MGI:1342541]
MGP_C57BL6NJ_G0016465	Carf	Others	calcium response factor [Source:MGI Symbol;Acc:MGI:2182269]
MGP_C57BL6NJ_G0016346	Npas2	bHLH	neuronal PAS domain protein 2 [Source:MGI Symbol;Acc:MGI:109232]
MGP_C57BL6NJ_G0016406	Pms1	HMG	PMS1 homolog 1, mismatch repair system component [Source:MGI Symbol;Acc:MGI:1202302]
MGP_C57BL6NJ_G0016396	Stat1	STAT	signal transducer and activator of transcription 1 [Source:MGI Symbol;Acc:MGI:103063]
MGP_C57BL6NJ_G0016546	Zfp142	zf-C2H2	zinc finger protein 142 [Source:MGI Symbol;Acc:MGI:1924514]
MGP_C57BL6NJ_G0016625	Sp100	SAND	nuclear antigen Sp100 [Source:MGI Symbol;Acc:MGI:109561]
MGP_C57BL6NJ_G0016743	Thap4	THAP	THAP domain containing 4 [Source:MGI Symbol;Acc:MGI:1914276]
MGP_C57BL6NJ_G0016696	Lrrfip1	LRRFIP	leucine rich repeat (in FLII) interacting protein 1 [Source:MGI Symbol;Acc:MGI:1342770]
MGP_C57BL6NJ_G0016796	Tfcp2l1	CP2	transcription factor CP2-like 1 [Source:MGI Symbol;Acc:MGI:2444691]
MGP_C57BL6NJ_G0016948	Nr5a2	SF-like	nuclear receptor subfamily 5, group A, member 2 [Source:MGI Symbol;Acc:MGI:1346834]
MGP_C57BL6NJ_G0016868	Elk4	ETS	ELK4, member of ETS oncogene family [Source:MGI Symbol;Acc:MGI:102853]
MGP_C57BL6NJ_G0016906	Myog	bHLH	myogenin [Source:MGI Symbol;Acc:MGI:97276]
MGP_C57BL6NJ_G0017018	Lhx4	Homeobox	LIM homeobox protein 4 [Source:MGI Symbol;Acc:MGI:101776]
MGP_C57BL6NJ_G0017263	Ahctf1	Others	AT hook containing transcription factor 1 [Source:MGI Symbol;Acc:MGI:1915033]
MGP_C57BL6NJ_G0017272	Mixl1	Homeobox	Mix1 homeobox-like 1 (Xenopus laevis) [Source:MGI Symbol;Acc:MGI:1351322]
MGP_C57BL6NJ_G0017102	Pou2f1	Pou	POU domain, class 2, transcription factor 1 [Source:MGI Symbol;Acc:MGI:101898]
MGP_C57BL6NJ_G0017091	Tbx19	T-box	T-box 19 [Source:MGI Symbol;Acc:MGI:1891158]
MGP_C57BL6NJ_G0017086	Blzf1	Others	basic leucine zipper nuclear factor 1 [Source:MGI Symbol;Acc:MGI:1201607]
MGP_C57BL6NJ_G0017073	Prrx1	Homeobox	paired related homeobox 1 [Source:MGI Symbol;Acc:MGI:97712]
MGP_C57BL6NJ_G0017324	Esrrg	ESR-like	estrogen-related receptor gamma [Source:MGI Symbol;Acc:MGI:1347056]
MGP_C57BL6NJ_G0017341	Atf3	TF_bZIP	activating transcription factor 3 [Source:MGI Symbol;Acc:MGI:109384]
MGP_C57BL6NJ_G0017339	Batf3	TF_bZIP	basic leucine zipper transcription factor, ATF-like 3 [Source:MGI Symbol;Acc:MGI:1925491]
MGP_C57BL6NJ_G0017358	Irf6	IRF	interferon regulatory factor 6 [Source:MGI Symbol;Acc:MGI:1859211]
MGP_C57BL6NJ_G0017163	Usf1	bHLH	upstream transcription factor 1 [Source:MGI Symbol;Acc:MGI:99542]
MGP_C57BL6NJ_G0017135	Atf6	TF_bZIP	activating transcription factor 6 [Source:MGI Symbol;Acc:MGI:1926157]
MGP_C57BL6NJ_G0017119	Lmx1a	Homeobox	LIM homeobox transcription factor 1 alpha [Source:MGI Symbol;Acc:MGI:1888519]
MGP_C57BL6NJ_G0025798	Ptf1a	bHLH	pancreas specific transcription factor, 1a [Source:MGI Symbol;Acc:MGI:1328312]
MGP_C57BL6NJ_G0025790	Dnajc1	MYB	DnaJ heat shock protein family (Hsp40) member C1 [Source:MGI Symbol;Acc:MGI:103268]
MGP_C57BL6NJ_G0025789	Mllt10	Others	myeloid/lymphoid or mixed-lineage leukemia; translocated to, 10 [Source:MGI Symbol;Acc:MGI:1329038]
MGP_C57BL6NJ_G0026122	Nr5a1	SF-like	nuclear receptor subfamily 5, group A, member 1 [Source:MGI Symbol;Acc:MGI:1346833]
MGP_C57BL6NJ_G0026052	Zbtb43	ZBTB	zinc finger and BTB domain containing 43 [Source:MGI Symbol;Acc:MGI:1919084]
MGP_C57BL6NJ_G0025953	Ttf1	MYB	transcription termination factor, RNA polymerase I [Source:MGI Symbol;Acc:MGI:105044]
MGP_C57BL6NJ_G0025951	Barhl1	Homeobox	BarH like homeobox 1 [Source:MGI Symbol;Acc:MGI:1859288]
MGP_C57BL6NJ_G0025945	Gfi1b	zf-C2H2	growth factor independent 1B [Source:MGI Symbol;Acc:MGI:1276578]
MGP_C57BL6NJ_G0026160	Nr4a2	NGFIB-like	nuclear receptor subfamily 4, group A, member 2 [Source:MGI Symbol;Acc:MGI:1352456]
MGP_C57BL6NJ_G0026135	Zeb2	zf-C2H2	zinc finger E-box binding homeobox 2 [Source:MGI Symbol;Acc:MGI:1344407]
MGP_C57BL6NJ_G0026078	Lhx6	Homeobox	LIM homeobox protein 6 [Source:MGI Symbol;Acc:MGI:1306803]
MGP_C57BL6NJ_G0025895	Lhx3	Homeobox	LIM homeobox protein 3 [Source:MGI Symbol;Acc:MGI:102673]
MGP_C57BL6NJ_G0025827	Pax8	PAX	paired box 8 [Source:MGI Symbol;Acc:MGI:97492]
MGP_C57BL6NJ_G0026176	Baz2b	MBD	bromodomain adjacent to zinc finger domain, 2B [Source:MGI Symbol;Acc:MGI:2442782]
MGP_C57BL6NJ_G0026337	Ssrp1	HMG	structure specific recognition protein 1 [Source:MGI Symbol;Acc:MGI:107912]
MGP_C57BL6NJ_G0026269	Hoxd8	Homeobox	homeobox D8 [Source:MGI Symbol;Acc:MGI:96209]
MGP_C57BL6NJ_G0026260	Atf2	TF_bZIP	activating transcription factor 2 [Source:MGI Symbol;Acc:MGI:109349]
MGP_C57BL6NJ_G0026250	Sp3	zf-C2H2	trans-acting transcription factor 3 [Source:MGI Symbol;Acc:MGI:1277166]
MGP_C57BL6NJ_G0026651	Pax6	PAX	paired box 6 [Source:MGI Symbol;Acc:MGI:97490]
MGP_C57BL6NJ_G0026624	Elf5	ETS	E74-like factor 5 [Source:MGI Symbol;Acc:MGI:1335079]
MGP_C57BL6NJ_G0026845	Myef2	Others	myelin basic protein expression factor 2, repressor [Source:MGI Symbol;Acc:MGI:104592]
MGP_C57BL6NJ_G0026727	Meis2	Homeobox	Meis homeobox 2 [Source:MGI Symbol;Acc:MGI:108564]
MGP_C57BL6NJ_G0026583	Creb3l1	TF_bZIP	cAMP responsive element binding protein 3-like 1 [Source:MGI Symbol;Acc:MGI:1347062]
MGP_C57BL6NJ_G0026863	Gabpb1	Others	GA repeat binding protein, beta 1 [Source:MGI Symbol;Acc:MGI:95611]
MGP_C57BL6NJ_G0027024	Nkx2-2	Homeobox	NK2 homeobox 2 [Source:MGI Symbol;Acc:MGI:97347]
MGP_C57BL6NJ_G0027031	Gzf1	ZBTB	GDNF-inducible zinc finger protein 1 [Source:MGI Symbol;Acc:MGI:1921783]
MGP_C57BL6NJ_G0027079	Rbck1	Others	RanBP-type and C3HC4-type zinc finger containing 1 [Source:MGI Symbol;Acc:MGI:1344372]
MGP_C57BL6NJ_G0027143	E2f1	E2F	E2F transcription factor 1 [Source:MGI Symbol;Acc:MGI:101941]
MGP_C57BL6NJ_G0027350	Nfatc2	RHD	nuclear factor of activated T cells, cytoplasmic, calcineurin dependent 2 [Source:MGI Symbol;Acc:MGI:102463]
MGP_C57BL6NJ_G0027352	Sall4	zf-C2H2	spalt like transcription factor 4 [Source:MGI Symbol;Acc:MGI:2139360]
MGP_C57BL6NJ_G0027353	Zfp64	zf-C2H2	zinc finger protein 64 [Source:MGI Symbol;Acc:MGI:107342]
MGP_C57BL6NJ_G0027491	E2f5	E2F	E2F transcription factor 5 [Source:MGI Symbol;Acc:MGI:105091]
MGP_C57BL6NJ_G0027442	Zgpat	Others	zinc finger, CCCH-type with G patch domain [Source:MGI Symbol;Acc:MGI:2449939]
MGP_C57BL6NJ_G0027444	Zbtb46	ZBTB	zinc finger and BTB domain containing 46 [Source:MGI Symbol;Acc:MGI:1919397]
MGP_C57BL6NJ_G0027553	Zmat3	zf-C2H2	zinc finger matrin type 3 [Source:MGI Symbol;Acc:MGI:1195270]
MGP_C57BL6NJ_G0027556	Zfp639	zf-C2H2	zinc finger protein 639 [Source:MGI Symbol;Acc:MGI:1915028]
MGP_C57BL6NJ_G0027538	Mecom	zf-C2H2	MDS1 and EVI1 complex locus [Source:MGI Symbol;Acc:MGI:95457]
MGP_C57BL6NJ_G0027641	Sohlh2	bHLH	spermatogenesis and oogenesis specific basic helix-loop-helix 2 [Source:MGI Symbol;Acc:MGI:1921684]
MGP_C57BL6NJ_G0027635	Smad9	MH1	SMAD family member 9 [Source:MGI Symbol;Acc:MGI:1859993]
MGP_C57BL6NJ_G0027653	Tsc22d2	TSC22	TSC22 domain family, member 2 [Source:MGI Symbol;Acc:MGI:1919283]
MGP_C57BL6NJ_G0027696	Shox2	Homeobox	short stature homeobox 2 [Source:MGI Symbol;Acc:MGI:1201673]
MGP_C57BL6NJ_G0028078	Tbx15	T-box	T-box 15 [Source:MGI Symbol;Acc:MGI:1277234]
MGP_C57BL6NJ_G0027877	Creb3l4	TF_bZIP	cAMP responsive element binding protein 3-like 4 [Source:MGI Symbol;Acc:MGI:1916603]
MGP_C57BL6NJ_G0028278	Neurog2	bHLH	neurogenin 2 [Source:MGI Symbol;Acc:MGI:109619]
MGP_C57BL6NJ_G0028299	Lef1	HMG	lymphoid enhancer binding factor 1 [Source:MGI Symbol;Acc:MGI:96770]
MGP_C57BL6NJ_G0028283	Pitx2	Homeobox	paired-like homeodomain transcription factor 2 [Source:MGI Symbol;Acc:MGI:109340]
MGP_C57BL6NJ_G0027854	Zbtb7b	ZBTB	zinc finger and BTB domain containing 7B [Source:MGI Symbol;Acc:MGI:102755]
MGP_C57BL6NJ_G0028047	Pias3	zf-MIZ	protein inhibitor of activated STAT 3 [Source:MGI Symbol;Acc:MGI:1913126]
MGP_C57BL6NJ_G0027966	Rorc	THR-like	RAR-related orphan receptor gamma [Source:MGI Symbol;Acc:MGI:104856]
MGP_C57BL6NJ_G0028323	Nfkb1	RHD	nuclear factor of kappa light polypeptide gene enhancer in B cells 1, p105 [Source:MGI Symbol;Acc:MGI:97312]
MGP_C57BL6NJ_G0028674	Xpa	Others	xeroderma pigmentosum, complementation group A [Source:MGI Symbol;Acc:MGI:99135]
MGP_C57BL6NJ_G0028690	Nr4a3	NGFIB-like	nuclear receptor subfamily 4, group A, member 3 [Source:MGI Symbol;Acc:MGI:1352457]
MGP_C57BL6NJ_G0028781	Zfp618	zf-C2H2	zinc finger protein 618 [Source:MGI Symbol;Acc:MGI:1919950]
MGP_C57BL6NJ_G0028767	Zfp37	zf-C2H2	zinc finger protein 37 [Source:MGI Symbol;Acc:MGI:99181]
MGP_C57BL6NJ_G0028723	Tal2	bHLH	T cell acute lymphocytic leukemia 2 [Source:MGI Symbol;Acc:MGI:99540]
MGP_C57BL6NJ_G0028563	Nfx1	zf-NF-X1	nuclear transcription factor, X-box binding 1 [Source:MGI Symbol;Acc:MGI:1921414]
MGP_C57BL6NJ_G0028630	Creb3	TF_bZIP	cAMP responsive element binding protein 3 [Source:MGI Symbol;Acc:MGI:99946]
MGP_C57BL6NJ_G0028826	Bnc2	zf-C2H2	basonuclin 2 [Source:MGI Symbol;Acc:MGI:2443805]
MGP_C57BL6NJ_G0028927	Mier1	MYB	MEIR1 treanscription regulator [Source:MGI Symbol;Acc:MGI:1918398]
MGP_C57BL6NJ_G0028890	Nfia	CTF/NFI	nuclear factor I/A [Source:MGI Symbol;Acc:MGI:108056]
MGP_C57BL6NJ_G0028963	Dmrtb1	DM	DMRT-like family B with proline-rich C-terminal, 1 [Source:MGI Symbol;Acc:MGI:1927125]
MGP_C57BL6NJ_G0029129	Hivep3	zf-C2H2	human immunodeficiency virus type I enhancer binding protein 3 [Source:MGI Symbol;Acc:MGI:106589]
MGP_C57BL6NJ_G0029119	Ybx1	CSD	Y box protein 1 [Source:MGI Symbol;Acc:MGI:99146]
MGP_C57BL6NJ_G0027371	Tfap2c	AP-2	transcription factor AP-2, gamma [Source:MGI Symbol;Acc:MGI:106032]
MGP_C57BL6NJ_G0029154	Mycl	bHLH	v-myc avian myelocytomatosis viral oncogene lung carcinoma derived [Source:MGI Symbol;Acc:MGI:96799]
MGP_C57BL6NJ_G0029036	Dmbx1	Homeobox	diencephalon/mesencephalon homeobox 1 [Source:MGI Symbol;Acc:MGI:2153518]
MGP_C57BL6NJ_G0029020	Tal1	bHLH	T cell acute lymphocytic leukemia 1 [Source:MGI Symbol;Acc:MGI:98480]
MGP_C57BL6NJ_G0029447	Pax7	PAX	paired box 7 [Source:MGI Symbol;Acc:MGI:97491]
MGP_C57BL6NJ_G0029231	Zfp362	zf-C2H2	zinc finger protein 362 [Source:MGI Symbol;Acc:MGI:2652839]
MGP_C57BL6NJ_G0029245	Zbtb8a	ZBTB	zinc finger and BTB domain containing 8a [Source:MGI Symbol;Acc:MGI:1920930]
MGP_C57BL6NJ_G0029178	Mtf1	zf-C2H2	metal response element binding transcription factor 1 [Source:MGI Symbol;Acc:MGI:101786]
MGP_C57BL6NJ_G0029289	Gmeb1	SAND	glucocorticoid modulatory element binding protein 1 [Source:MGI Symbol;Acc:MGI:2135604]
MGP_C57BL6NJ_G0029604	Hes2	bHLH	hes family bHLH transcription factor 2 [Source:MGI Symbol;Acc:MGI:1098624]
MGP_C57BL6NJ_G0029607	Hes3	bHLH	hes family bHLH transcription factor 3 [Source:MGI Symbol;Acc:MGI:104877]
MGP_C57BL6NJ_G0029598	Zbtb48	ZBTB	zinc finger and BTB domain containing 48 [Source:MGI Symbol;Acc:MGI:2140248]
MGP_C57BL6NJ_G0029561	Casz1	Others	castor zinc finger 1 [Source:MGI Symbol;Acc:MGI:1196251]
MGP_C57BL6NJ_G0029753	Dnajc2	MYB	DnaJ heat shock protein family (Hsp40) member C2 [Source:MGI Symbol;Acc:MGI:99470]
MGP_C57BL6NJ_G0029621	Trp73	P53	transformation related protein 73 [Source:MGI Symbol;Acc:MGI:1336991]
MGP_C57BL6NJ_G0029877	Nkx1-1	Homeobox	NK1 homeobox 1 [Source:MGI Symbol;Acc:MGI:109346]
MGP_C57BL6NJ_G0029938	Zbtb49	ZBTB	zinc finger and BTB domain containing 49 [Source:MGI Symbol;Acc:MGI:1922329]
MGP_C57BL6NJ_G0029863	Fosl2	TF_bZIP	fos-like antigen 2 [Source:MGI Symbol;Acc:MGI:102858]
MGP_C57BL6NJ_G0029824	Cenpa	Others	centromere protein A [Source:MGI Symbol;Acc:MGI:88375]
MGP_C57BL6NJ_G0029998	Klf3	zf-C2H2	Kruppel-like factor 3 (basic) [Source:MGI Symbol;Acc:MGI:1342773]
MGP_C57BL6NJ_G0029920	Tada2b	MYB	transcriptional adaptor 2B [Source:MGI Symbol;Acc:MGI:3035274]
MGP_C57BL6NJ_G0030073	Clock	bHLH	circadian locomotor output cycles kaput [Source:MGI Symbol;Acc:MGI:99698]
MGP_C57BL6NJ_G0030087	Rest	zf-C2H2	RE1-silencing transcription factor [Source:MGI Symbol;Acc:MGI:104897]
MGP_C57BL6NJ_G0030274	Gfi1	zf-C2H2	growth factor independent 1 transcription repressor [Source:MGI Symbol;Acc:MGI:103170]
MGP_C57BL6NJ_G0030258	Zfp326	Others	zinc finger protein 326 [Source:MGI Symbol;Acc:MGI:1927246]
MGP_C57BL6NJ_G0030234	Aff1	AF-4	AF4/FMR2 family, member 1 [Source:MGI Symbol;Acc:MGI:1100819]
MGP_C57BL6NJ_G0030537	Ncor2	MYB	nuclear receptor co-repressor 2 [Source:MGI Symbol;Acc:MGI:1337080]
MGP_C57BL6NJ_G0030718	Uncx	Homeobox	UNC homeobox [Source:MGI Symbol;Acc:MGI:108013]
MGP_C57BL6NJ_G0030903	Tfec	bHLH	transcription factor EC [Source:MGI Symbol;Acc:MGI:1333760]
MGP_C57BL6NJ_G0030384	Hnf1a	Homeobox	HNF1 homeobox A [Source:MGI Symbol;Acc:MGI:98504]
MGP_C57BL6NJ_G0030901	Foxp2	Fork_head	forkhead box P2 [Source:MGI Symbol;Acc:MGI:2148705]
MGP_C57BL6NJ_G0030756	Zfp12	zf-C2H2	zinc finger protein 12 [Source:MGI Symbol;Acc:MGI:99157]
MGP_C57BL6NJ_G0030431	Lhx5	Homeobox	LIM homeobox protein 5 [Source:MGI Symbol;Acc:MGI:107792]
MGP_C57BL6NJ_G0030793	Zkscan14	zf-C2H2	zinc finger with KRAB and SCAN domains 14 [Source:MGI Symbol;Acc:MGI:1914485]
MGP_C57BL6NJ_G0030823	Pdx1	Homeobox	pancreatic and duodenal homeobox 1 [Source:MGI Symbol;Acc:MGI:102851]
MGP_C57BL6NJ_G0030824	Cdx2	Homeobox	caudal type homeobox 2 [Source:MGI Symbol;Acc:MGI:88361]
MGP_C57BL6NJ_G0030924	Fezf1	zf-C2H2	Fez family zinc finger 1 [Source:MGI Symbol;Acc:MGI:1920441]
MGP_C57BL6NJ_G0030637	Cux1	CUT	cut-like homeobox 1 [Source:MGI Symbol;Acc:MGI:88568]
MGP_C57BL6NJ_G0030947	Pax4	PAX	paired box 4 [Source:MGI Symbol;Acc:MGI:97488]
MGP_C57BL6NJ_G0030672	Tsc22d4	TSC22	TSC22 domain family, member 4 [Source:MGI Symbol;Acc:MGI:1926079]
MGP_C57BL6NJ_G0030682	Zkscan1	zf-C2H2	zinc finger with KRAB and SCAN domains 1 [Source:MGI Symbol;Acc:MGI:1921820]
MGP_C57BL6NJ_G0031114	Nobox	Homeobox	NOBOX oogenesis homeobox [Source:MGI Symbol;Acc:MGI:108011]
MGP_C57BL6NJ_G0030877	Dlx6	Homeobox	distal-less homeobox 6 [Source:MGI Symbol;Acc:MGI:101927]
MGP_C57BL6NJ_G0030878	Dlx5	Homeobox	distal-less homeobox 5 [Source:MGI Symbol;Acc:MGI:101926]
MGP_C57BL6NJ_G0030964	Irf5	IRF	interferon regulatory factor 5 [Source:MGI Symbol;Acc:MGI:1350924]
MGP_C57BL6NJ_G0031169	Nfe2l3	TF_bZIP	nuclear factor, erythroid derived 2, like 3 [Source:MGI Symbol;Acc:MGI:1339958]
MGP_C57BL6NJ_G0031174	Hoxa1	Homeobox	homeobox A1 [Source:MGI Symbol;Acc:MGI:96170]
MGP_C57BL6NJ_G0031270	Prdm5	zf-C2H2	PR domain containing 5 [Source:MGI Symbol;Acc:MGI:1918029]
MGP_C57BL6NJ_G0031405	Figla	bHLH	folliculogenesis specific basic helix-loop-helix [Source:MGI Symbol;Acc:MGI:1349421]
MGP_C57BL6NJ_G0031437	Cnbp	Others	cellular nucleic acid binding protein [Source:MGI Symbol;Acc:MGI:88431]
MGP_C57BL6NJ_G0031512	Tmf1	Others	TATA element modulatory factor 1 [Source:MGI Symbol;Acc:MGI:2684999]
MGP_C57BL6NJ_G0031519	Foxp1	Fork_head	forkhead box P1 [Source:MGI Symbol;Acc:MGI:1914004]
MGP_C57BL6NJ_G0031477	Klf15	zf-C2H2	Kruppel-like factor 15 [Source:MGI Symbol;Acc:MGI:1929988]
MGP_C57BL6NJ_G0031540	Bhlhe40	bHLH	basic helix-loop-helix family, member e40 [Source:MGI Symbol;Acc:MGI:1097714]
MGP_C57BL6NJ_G0031624	Zfp248	zf-C2H2	zinc finger protein 248 [Source:MGI Symbol;Acc:MGI:1919970]
MGP_C57BL6NJ_G0031810	Ybx3	CSD	Y box protein 3 [Source:MGI Symbol;Acc:MGI:2137670]
MGP_C57BL6NJ_G0031844	Etv6	ETS	ets variant 6 [Source:MGI Symbol;Acc:MGI:109336]
MGP_C57BL6NJ_G0031893	Aebp2	zf-C2H2	AE binding protein 2 [Source:MGI Symbol;Acc:MGI:1338038]
MGP_C57BL6NJ_G0031927	Bhlhe41	bHLH	basic helix-loop-helix family, member e41 [Source:MGI Symbol;Acc:MGI:1930704]
MGP_C57BL6NJ_G0031596	Mbd4	MBD	methyl-CpG binding domain protein 4 [Source:MGI Symbol;Acc:MGI:1333850]
MGP_C57BL6NJ_G0031756	Tead4	TEA	TEA domain family member 4 [Source:MGI Symbol;Acc:MGI:106907]
MGP_C57BL6NJ_G0032107	Mzf1	zf-C2H2	myeloid zinc finger 1 [Source:MGI Symbol;Acc:MGI:107457]
MGP_C57BL6NJ_G0032088	Zfp606	zf-C2H2	zinc finger protein 606 [Source:MGI Symbol;Acc:MGI:1914620]
MGP_C57BL6NJ_G0032070	Zik1	zf-C2H2	zinc finger protein interacting with K protein 1 [Source:MGI Symbol;Acc:MGI:108070]
MGP_C57BL6NJ_G0032044	Zfp583	zf-C2H2	zinc finger protein 583 [Source:MGI Symbol;Acc:MGI:2682297]
MGP_C57BL6NJ_G0032606	Zfp719	zf-C2H2	zinc finger protein 719 [Source:MGI Symbol;Acc:MGI:2444708]
MGP_C57BL6NJ_G0032269	Zfp108	zf-C2H2	zinc finger protein 108 [Source:MGI Symbol;Acc:MGI:1891198]
MGP_C57BL6NJ_G0032782	Dbx1	Homeobox	developing brain homeobox 1 [Source:MGI Symbol;Acc:MGI:94867]
MGP_C57BL6NJ_G0032880	Mesp2	bHLH	mesoderm posterior 2 [Source:MGI Symbol;Acc:MGI:1096325]
MGP_C57BL6NJ_G0032879	Mesp1	bHLH	mesoderm posterior 1 [Source:MGI Symbol;Acc:MGI:107785]
MGP_C57BL6NJ_G0032848	Nr2f2	RXR-like	nuclear receptor subfamily 2, group F, member 2 [Source:MGI Symbol;Acc:MGI:1352452]
MGP_C57BL6NJ_G0032841	Mef2a	SRF	myocyte enhancer factor 2A [Source:MGI Symbol;Acc:MGI:99532]
MGP_C57BL6NJ_G0032372	Zfp626	zf-C2H2	zinc finger protein 626 [Source:MGI Symbol;Acc:MGI:1918413]
MGP_C57BL6NJ_G0033511	Maz	zf-C2H2	MYC-associated zinc finger protein (purine-binding transcription factor) [Source:MGI Symbol;Acc:MGI:1338823]
MGP_C57BL6NJ_G0033492	Tbx6	T-box	T-box 6 [Source:MGI Symbol;Acc:MGI:102539]
MGP_C57BL6NJ_G0033025	Thap12	THAP	THAP domain containing 12 [Source:MGI Symbol;Acc:MGI:1920231]
MGP_C57BL6NJ_G0033458	Zkscan2	zf-C2H2	zinc finger with KRAB and SCAN domains 2 [Source:MGI Symbol;Acc:MGI:2444060]
MGP_C57BL6NJ_G0032693	Tead2	TEA	TEA domain family member 2 [Source:MGI Symbol;Acc:MGI:104904]
MGP_C57BL6NJ_G0033529	9130019O22Rik	zf-C2H2	RIKEN cDNA 9130019O22 gene [Source:MGI Symbol;Acc:MGI:1926171]
MGP_C57BL6NJ_G0033331	Tub	Tub	tubby bipartite transcription factor [Source:MGI Symbol;Acc:MGI:2651573]
MGP_C57BL6NJ_G0036111	Zfp300	zf-C2H2	zinc finger protein 300 [Source:MGI Symbol;Acc:MGI:3045326]
MGP_C57BL6NJ_G0036182	Smarca1	MYB	SWI/SNF related, matrix associated, actin dependent regulator of chromatin, subfamily a, member 1 [Source:MGI Symbol;Acc:MGI:1935127]
MGP_C57BL6NJ_G0036190	Elf4	ETS	E74-like factor 4 (ets domain transcription factor) [Source:MGI Symbol;Acc:MGI:1928377]
MGP_C57BL6NJ_G0036034	Gata1	zf-GATA	GATA binding protein 1 [Source:MGI Symbol;Acc:MGI:95661]
MGP_C57BL6NJ_G0036274	Aff2	AF-4	AF4/FMR2 family, member 2 [Source:MGI Symbol;Acc:MGI:1202294]
MGP_C57BL6NJ_G0036511	Tbx22	T-box	T-box 22 [Source:MGI Symbol;Acc:MGI:2389465]
MGP_C57BL6NJ_G0036477	Dmrtc1a	Others	DMRT-like family C1a [Source:MGI Symbol;Acc:MGI:1918137]
MGP_C57BL6NJ_G0036479	Cdx4	Homeobox	caudal type homeobox 4 [Source:MGI Symbol;Acc:MGI:88362]
MGP_C57BL6NJ_G0036303	Zfp275	zf-C2H2	zinc finger protein 275 [Source:MGI Symbol;Acc:MGI:1350985]
MGP_C57BL6NJ_G0036304	Zfp92	zf-C2H2	zinc finger protein 92 [Source:MGI Symbol;Acc:MGI:108094]
MGP_C57BL6NJ_G0036326	Mecp2	MBD	methyl CpG binding protein 2 [Source:MGI Symbol;Acc:MGI:99918]
MGP_C57BL6NJ_G0036628	Tsc22d3	TSC22	TSC22 domain family, member 3 [Source:MGI Symbol;Acc:MGI:1196284]
MGP_C57BL6NJ_G0034295	Nr3c2	ESR-like	nuclear receptor subfamily 3, group C, member 2 [Source:MGI Symbol;Acc:MGI:99459]
MGP_C57BL6NJ_G0034288	Isx	Homeobox	intestine specific homeobox [Source:MGI Symbol;Acc:MGI:1918847]
MGP_C57BL6NJ_G0034087	Irf2	IRF	interferon regulatory factor 2 [Source:MGI Symbol;Acc:MGI:96591]
MGP_C57BL6NJ_G0034420	Sall1	zf-C2H2	spalt like transcription factor 1 [Source:MGI Symbol;Acc:MGI:1889585]
MGP_C57BL6NJ_G0034308	Smad1	MH1	SMAD family member 1 [Source:MGI Symbol;Acc:MGI:109452]
MGP_C57BL6NJ_G0034301	Pou4f2	Pou	POU domain, class 4, transcription factor 2 [Source:MGI Symbol;Acc:MGI:102524]
MGP_C57BL6NJ_G0034349	Rfx1	RFX	regulatory factor X, 1 (influences HLA class II expression) [Source:MGI Symbol;Acc:MGI:105982]
MGP_C57BL6NJ_G0034429	Irx3	Homeobox	Iroquois related homeobox 3 [Source:MGI Symbol;Acc:MGI:1197522]
MGP_C57BL6NJ_G0034430	Irx5	Homeobox	Iroquois homeobox 5 [Source:MGI Symbol;Acc:MGI:1859086]
MGP_C57BL6NJ_G0034431	Irx6	Homeobox	Iroquois homeobox 6 [Source:MGI Symbol;Acc:MGI:1927642]
MGP_C57BL6NJ_G0034175	Pbx4	Homeobox	pre B cell leukemia homeobox 4 [Source:MGI Symbol;Acc:MGI:1931321]
MGP_C57BL6NJ_G0034830	Pgr	ESR-like	progesterone receptor [Source:MGI Symbol;Acc:MGI:97567]
MGP_C57BL6NJ_G0034522	Cbfb	CBF	core binding factor beta [Source:MGI Symbol;Acc:MGI:99851]
MGP_C57BL6NJ_G0034569	Nfatc3	RHD	nuclear factor of activated T cells, cytoplasmic, calcineurin dependent 3 [Source:MGI Symbol;Acc:MGI:103296]
MGP_C57BL6NJ_G0034576	Zfp90	zf-C2H2	zinc finger protein 90 [Source:MGI Symbol;Acc:MGI:104786]
MGP_C57BL6NJ_G0034590	Terf2	MYB	telomeric repeat binding factor 2 [Source:MGI Symbol;Acc:MGI:1195972]
MGP_C57BL6NJ_G0034985	Tbx20	T-box	T-box 20 [Source:MGI Symbol;Acc:MGI:1888496]
MGP_C57BL6NJ_G0035176	Pou2f3	Pou	POU domain, class 2, transcription factor 3 [Source:MGI Symbol;Acc:MGI:102565]
MGP_C57BL6NJ_G0035011	Barx2	Homeobox	BarH-like homeobox 2 [Source:MGI Symbol;Acc:MGI:109617]
MGP_C57BL6NJ_G0035016	Ets1	ETS	E26 avian leukemia oncogene 1, 5' domain [Source:MGI Symbol;Acc:MGI:95455]
MGP_C57BL6NJ_G0035192	Hinfp	zf-C2H2	histone H4 transcription factor [Source:MGI Symbol;Acc:MGI:2429620]
MGP_C57BL6NJ_G0035504	Tcf12	bHLH	transcription factor 12 [Source:MGI Symbol;Acc:MGI:101877]
MGP_C57BL6NJ_G0035482	Rora	THR-like	RAR-related orphan receptor alpha [Source:MGI Symbol;Acc:MGI:104661]
MGP_C57BL6NJ_G0035400	Nr2e3	RXR-like	nuclear receptor subfamily 2, group E, member 3 [Source:MGI Symbol;Acc:MGI:1346317]
MGP_C57BL6NJ_G0035335	Isl2	Homeobox	insulin related protein 2 (islet 2) [Source:MGI Symbol;Acc:MGI:109156]
MGP_C57BL6NJ_G0035342	Hmg20a	HMG	high mobility group 20A [Source:MGI Symbol;Acc:MGI:1914117]
MGP_C57BL6NJ_G0035617	Zic1	zf-C2H2	zinc finger protein of the cerebellum 1 [Source:MGI Symbol;Acc:MGI:106683]
MGP_C57BL6NJ_G0035620	Plscr1	Others	phospholipid scramblase 1 [Source:MGI Symbol;Acc:MGI:893575]
MGP_C57BL6NJ_G0035424	Smad3	MH1	SMAD family member 3 [Source:MGI Symbol;Acc:MGI:1201674]
MGP_C57BL6NJ_G0035418	Pias1	zf-MIZ	protein inhibitor of activated STAT 1 [Source:MGI Symbol;Acc:MGI:1913125]
MGP_C57BL6NJ_G0035636	Tfdp2	E2F	transcription factor Dp 2 [Source:MGI Symbol;Acc:MGI:107167]
MGP_C57BL6NJ_G0035598	Tbx18	T-box	T-box18 [Source:MGI Symbol;Acc:MGI:1923615]
MGP_C57BL6NJ_G0035603	Zfp949	zf-C2H2	zinc finger protein 949 [Source:MGI Symbol;Acc:MGI:1918890]
MGP_C57BL6NJ_G0035904	Eomes	T-box	eomesodermin [Source:MGI Symbol;Acc:MGI:1201683]
MGP_C57BL6NJ_G0035840	Smarcc1	MYB	SWI/SNF related, matrix associated, actin dependent regulator of chromatin, subfamily c, member 1 [Source:MGI Symbol;Acc:MGI:1203524]
MGP_C57BL6NJ_G0035866	Ltf	Others	lactotransferrin [Source:MGI Symbol;Acc:MGI:96837]
MGP_C57BL6NJ_G0035868	Lrrfip2	LRRFIP	leucine rich repeat (in FLII) interacting protein 2 [Source:MGI Symbol;Acc:MGI:1918518]
MGP_C57BL6NJ_G0035927	Csrnp1	CSRNP_N	cysteine-serine-rich nuclear protein 1 [Source:MGI Symbol;Acc:MGI:2387989]
MGP_C57BL6NJ_G0031850	Crebl2	Others	cAMP responsive element binding protein-like 2 [Source:MGI Symbol;Acc:MGI:1889385]
MGP_C57BL6NJ_G0021319	Mier3	MYB	MIER family member 3 [Source:MGI Symbol;Acc:MGI:2442317]
MGP_C57BL6NJ_G0029161	Heyl	bHLH	hairy/enhancer-of-split related with YRPW motif-like [Source:MGI Symbol;Acc:MGI:1860511]
MGP_C57BL6NJ_G0021317	Gpbp1	Others	GC-rich promoter binding protein 1 [Source:MGI Symbol;Acc:MGI:1920524]
MGP_C57BL6NJ_G0029138	Nfyc	NF-YC	nuclear transcription factor-Y gamma [Source:MGI Symbol;Acc:MGI:107901]
MGP_C57BL6NJ_G0029126	Foxj3	Fork_head	forkhead box J3 [Source:MGI Symbol;Acc:MGI:2443432]
MGP_C57BL6NJ_G0022477	Sox10	HMG	SRY (sex determining region Y)-box 10 [Source:MGI Symbol;Acc:MGI:98358]
MGP_C57BL6NJ_G0025009	Nfatc1	RHD	nuclear factor of activated T cells, cytoplasmic, calcineurin dependent 1 [Source:MGI Symbol;Acc:MGI:102469]
MGP_C57BL6NJ_G0027054	Vsx1	Homeobox	visual system homeobox 1 [Source:MGI Symbol;Acc:MGI:1890816]
MGP_C57BL6NJ_G0022678	Arid2	ARID	AT rich interactive domain 2 (ARID, RFX-like) [Source:MGI Symbol;Acc:MGI:1924294]
MGP_C57BL6NJ_G0034527	Hsf4	HSF	heat shock transcription factor 4 [Source:MGI Symbol;Acc:MGI:1347058]
MGP_C57BL6NJ_G0020246	Zbtb1	ZBTB	zinc finger and BTB domain containing 1 [Source:MGI Symbol;Acc:MGI:2442326]
MGP_C57BL6NJ_G0022421	Zfp7	zf-C2H2	zinc finger protein 7 [Source:MGI Symbol;Acc:MGI:99208]
MGP_C57BL6NJ_G0020401	Foxn3	Fork_head	forkhead box N3 [Source:MGI Symbol;Acc:MGI:1918625]
MGP_C57BL6NJ_G0031388	Emx1	Homeobox	empty spiracles homeobox 1 [Source:MGI Symbol;Acc:MGI:95387]
MGP_C57BL6NJ_G0021932	Egr3	zf-C2H2	early growth response 3 [Source:MGI Symbol;Acc:MGI:1306780]
MGP_C57BL6NJ_G0016210	St18	zf-C2HC	suppression of tumorigenicity 18 [Source:MGI Symbol;Acc:MGI:2446700]
MGP_C57BL6NJ_G0022412	Foxh1	Fork_head	forkhead box H1 [Source:MGI Symbol;Acc:MGI:1347465]
MGP_C57BL6NJ_G0025401	Klf9	zf-C2H2	Kruppel-like factor 9 [Source:MGI Symbol;Acc:MGI:1333856]
MGP_C57BL6NJ_G0027574	D3Ertd254e	zf-C2H2	DNA segment, Chr 3, ERATO Doi 254, expressed [Source:MGI Symbol;Acc:MGI:1098769]
MGP_C57BL6NJ_G0026775	Mga	T-box	MAX gene associated [Source:MGI Symbol;Acc:MGI:1352483]
MGP_C57BL6NJ_G0032101	Zfp446	zf-C2H2	zinc finger protein 446 [Source:MGI Symbol;Acc:MGI:2442185]
MGP_C57BL6NJ_G0016956	Zbtb41	ZBTB	zinc finger and BTB domain containing 41 [Source:MGI Symbol;Acc:MGI:2444487]
MGP_C57BL6NJ_G0023651	Zfp944	zf-C2H2	zinc finger protein 944 [Source:MGI Symbol;Acc:MGI:2442394]
MGP_C57BL6NJ_G0034364	Lyl1	bHLH	lymphoblastomic leukemia 1 [Source:MGI Symbol;Acc:MGI:96891]
MGP_C57BL6NJ_G0029050	Gpbp1l1	Others	GC-rich promoter binding protein 1-like 1 [Source:MGI Symbol;Acc:MGI:1924360]
MGP_C57BL6NJ_G0018143	Myrfl	NDT80/PhoG	myelin regulatory factor-like [Source:MGI Symbol;Acc:MGI:2685085]
MGP_C57BL6NJ_G0032087	Zfp551	zf-C2H2	zinc fingr protein 551 [Source:MGI Symbol;Acc:MGI:3588205]
MGP_C57BL6NJ_G0022400	Scx	bHLH	scleraxis [Source:MGI Symbol;Acc:MGI:102934]
MGP_C57BL6NJ_G0019817	Foxj1	Fork_head	forkhead box J1 [Source:MGI Symbol;Acc:MGI:1347474]
MGP_C57BL6NJ_G0020351	Batf	TF_bZIP	basic leucine zipper transcription factor, ATF-like [Source:MGI Symbol;Acc:MGI:1859147]
MGP_C57BL6NJ_G0020350	Jdp2	TF_bZIP	Jun dimerization protein 2 [Source:MGI Symbol;Acc:MGI:1932093]
MGP_C57BL6NJ_G0022617	Zbed4	zf-BED	zinc finger, BED type containing 4 [Source:MGI Symbol;Acc:MGI:2682302]
MGP_C57BL6NJ_G0030259	Barhl2	Homeobox	BarH like homeobox 2 [Source:MGI Symbol;Acc:MGI:1859314]
MGP_C57BL6NJ_G0022375	Zfp707	zf-C2H2	zinc finger protein 707 [Source:MGI Symbol;Acc:MGI:1916270]
MGP_C57BL6NJ_G0031475	Zxdc	zf-C2H2	ZXD family zinc finger C [Source:MGI Symbol;Acc:MGI:1933108]
MGP_C57BL6NJ_G0020223	Six4	Homeobox	sine oculis-related homeobox 4 [Source:MGI Symbol;Acc:MGI:106034]
MGP_C57BL6NJ_G0016687	Gbx2	Homeobox	gastrulation brain homeobox 2 [Source:MGI Symbol;Acc:MGI:95668]
MGP_C57BL6NJ_G0034289	Hmgxb4	HMG	HMG box domain containing 4 [Source:MGI Symbol;Acc:MGI:1918073]
MGP_C57BL6NJ_G0021883	Zfp395	Others	zinc finger protein 395 [Source:MGI Symbol;Acc:MGI:2682318]
MGP_C57BL6NJ_G0032063	Zfp418	zf-C2H2	zinc finger protein 418 [Source:MGI Symbol;Acc:MGI:2444763]
MGP_C57BL6NJ_G0036524	Hdx	Homeobox	highly divergent homeobox [Source:MGI Symbol;Acc:MGI:2685226]
MGP_C57BL6NJ_G0023984	Pbx2	Homeobox	pre B cell leukemia homeobox 2 [Source:MGI Symbol;Acc:MGI:1341793]
MGP_C57BL6NJ_G0026297	Neurod1	bHLH	neurogenic differentiation 1 [Source:MGI Symbol;Acc:MGI:1339708]
MGP_C57BL6NJ_G0028962	Glis1	zf-C2H2	GLIS family zinc finger 1 [Source:MGI Symbol;Acc:MGI:2386723]
MGP_C57BL6NJ_G0031376	Vax2	Homeobox	ventral anterior homeobox 2 [Source:MGI Symbol;Acc:MGI:1346018]
MGP_C57BL6NJ_G0026884	Zfp661	zf-C2H2	zinc finger protein 661 [Source:MGI Symbol;Acc:MGI:1919430]
MGP_C57BL6NJ_G0032546	Cebpa	TF_bZIP	CCAAT/enhancer binding protein (C/EBP), alpha [Source:MGI Symbol;Acc:MGI:99480]
MGP_C57BL6NJ_G0031355	Lbx2	Homeobox	ladybird homeobox 2 [Source:MGI Symbol;Acc:MGI:1342288]
MGP_C57BL6NJ_G0024515	Foxn2	Fork_head	forkhead box N2 [Source:MGI Symbol;Acc:MGI:1347478]
MGP_C57BL6NJ_G0017931	Zbtb7a	ZBTB	zinc finger and BTB domain containing 7a [Source:MGI Symbol;Acc:MGI:1335091]
MGP_C57BL6NJ_G0026185	Tbr1	T-box	T-box brain gene 1 [Source:MGI Symbol;Acc:MGI:107404]
MGP_C57BL6NJ_G0017929	Creb3l3	TF_bZIP	cAMP responsive element binding protein 3-like 3 [Source:MGI Symbol;Acc:MGI:2384786]
MGP_C57BL6NJ_G0031340	Gcfc2	GCFC	GC-rich sequence DNA binding factor 2 [Source:MGI Symbol;Acc:MGI:2141656]
MGP_C57BL6NJ_G0031517	Mitf	bHLH	melanogenesis associated transcription factor [Source:MGI Symbol;Acc:MGI:104554]
MGP_C57BL6NJ_G0030226	Nkx6-1	Homeobox	NK6 homeobox 1 [Source:MGI Symbol;Acc:MGI:1206039]
MGP_C57BL6NJ_G0036401	Arx	Homeobox	aristaless related homeobox [Source:MGI Symbol;Acc:MGI:1097716]
MGP_C57BL6NJ_G0017901	Klf16	zf-C2H2	Kruppel-like factor 16 [Source:MGI Symbol;Acc:MGI:2153049]
MGP_C57BL6NJ_G0024834	Fam170a	Others	family with sequence similarity 170, member A [Source:MGI Symbol;Acc:MGI:2684939]
MGP_C57BL6NJ_G0034994	Thyn1	Others	thymocyte nuclear protein 1 [Source:MGI Symbol;Acc:MGI:1925112]
MGP_C57BL6NJ_G0020152	Foxa1	Fork_head	forkhead box A1 [Source:MGI Symbol;Acc:MGI:1347472]
MGP_C57BL6NJ_G0030203	Prdm8	zf-C2H2	PR domain containing 8 [Source:MGI Symbol;Acc:MGI:1924880]
MGP_C57BL6NJ_G0017895	Mbd3	MBD	methyl-CpG binding domain protein 3 [Source:MGI Symbol;Acc:MGI:1333812]
MGP_C57BL6NJ_G0018003	Prdm4	zf-C2H2	PR domain containing 4 [Source:MGI Symbol;Acc:MGI:1920093]
MGP_C57BL6NJ_G0027237	L3mbtl1	zf-C2HC	L3MBTL1 histone methyl-lysine binding protein [Source:MGI Symbol;Acc:MGI:2676663]
MGP_C57BL6NJ_G0020069	Twist1	bHLH	twist basic helix-loop-helix transcription factor 1 [Source:MGI Symbol;Acc:MGI:98872]
MGP_C57BL6NJ_G0027231	Zhx3	Homeobox	zinc fingers and homeoboxes 3 [Source:MGI Symbol;Acc:MGI:2444772]
MGP_C57BL6NJ_G0018107	Myf6	bHLH	myogenic factor 6 [Source:MGI Symbol;Acc:MGI:97253]
MGP_C57BL6NJ_G0035050	Pknox2	Homeobox	Pbx/knotted 1 homeobox 2 [Source:MGI Symbol;Acc:MGI:2445415]
MGP_C57BL6NJ_G0030067	Gsx2	Homeobox	GS homeobox 2 [Source:MGI Symbol;Acc:MGI:95843]
MGP_C57BL6NJ_G0033340	Ascl3	bHLH	achaete-scute family bHLH transcription factor 3 [Source:MGI Symbol;Acc:MGI:1928820]
MGP_C57BL6NJ_G0024096	Zfp57	zf-C2H2	zinc finger protein 57 [Source:MGI Symbol;Acc:MGI:99204]
MGP_C57BL6NJ_G0025257	Myrf	NDT80/PhoG	myelin regulatory factor [Source:MGI Symbol;Acc:MGI:2684944]
MGP_C57BL6NJ_G0034186	Rfxank	Others	regulatory factor X-associated ankyrin-containing protein [Source:MGI Symbol;Acc:MGI:1333865]
MGP_C57BL6NJ_G0022844	Hoxc9	Homeobox	homeobox C9 [Source:MGI Symbol;Acc:MGI:96199]
MGP_C57BL6NJ_G0020086	Meox2	Homeobox	mesenchyme homeobox 2 [Source:MGI Symbol;Acc:MGI:103219]
MGP_C57BL6NJ_G0025389	Rorb	THR-like	RAR-related orphan receptor beta [Source:MGI Symbol;Acc:MGI:1343464]
MGP_C57BL6NJ_G0025902	Snapc4	MYB	small nuclear RNA activating complex, polypeptide 4 [Source:MGI Symbol;Acc:MGI:2443935]
MGP_C57BL6NJ_G0034556	Thap11	THAP	THAP domain containing 11 [Source:MGI Symbol;Acc:MGI:1930964]
MGP_C57BL6NJ_G0022004	Elf1	ETS	E74-like factor 1 [Source:MGI Symbol;Acc:MGI:107180]
MGP_C57BL6NJ_G0018097	Alx1	Homeobox	ALX homeobox 1 [Source:MGI Symbol;Acc:MGI:104621]
MGP_C57BL6NJ_G0034555	Cenpt	Others	centromere protein T [Source:MGI Symbol;Acc:MGI:2443939]
MGP_C57BL6NJ_G0034352	Cc2d1a	Others	coiled-coil and C2 domain containing 1A [Source:MGI Symbol;Acc:MGI:2384831]
MGP_C57BL6NJ_G0020661	Zscan12	zf-C2H2	zinc finger and SCAN domain containing 12 [Source:MGI Symbol;Acc:MGI:1099444]
MGP_C57BL6NJ_G0017708	Atoh7	bHLH	atonal bHLH transcription factor 7 [Source:MGI Symbol;Acc:MGI:1355553]
MGP_C57BL6NJ_G0035425	Smad6	MH1	SMAD family member 6 [Source:MGI Symbol;Acc:MGI:1336883]
MGP_C57BL6NJ_G0030699	Zfp157	zf-C2H2	zinc finger protein 157 [Source:MGI Symbol;Acc:MGI:1919404]
MGP_C57BL6NJ_G0036193	Zfp280c	Others	zinc finger protein 280C [Source:MGI Symbol;Acc:MGI:2387585]
MGP_C57BL6NJ_G0035618	Zic4	zf-C2H2	zinc finger protein of the cerebellum 4 [Source:MGI Symbol;Acc:MGI:107201]
MGP_C57BL6NJ_G0023518	Tfb1m	Others	transcription factor B1, mitochondrial [Source:MGI Symbol;Acc:MGI:2146851]
MGP_C57BL6NJ_G0018772	Zfp39	zf-C2H2	zinc finger protein 39 [Source:MGI Symbol;Acc:MGI:99183]
MGP_C57BL6NJ_G0030684	Zfp113	zf-C2H2	zinc finger protein 113 [Source:MGI Symbol;Acc:MGI:1929116]
MGP_C57BL6NJ_G0030683	Zscan21	zf-C2H2	zinc finger and SCAN domain containing 21 [Source:MGI Symbol;Acc:MGI:99182]
MGP_C57BL6NJ_G0027026	Foxa2	Fork_head	forkhead box A2 [Source:MGI Symbol;Acc:MGI:1347476]
MGP_C57BL6NJ_G0032451	Zfp146	zf-C2H2	zinc finger protein 146 [Source:MGI Symbol;Acc:MGI:1347092]
MGP_C57BL6NJ_G0027025	Pax1	PAX	paired box 1 [Source:MGI Symbol;Acc:MGI:97485]
MGP_C57BL6NJ_G0016341	Aff3	AF-4	AF4/FMR2 family, member 3 [Source:MGI Symbol;Acc:MGI:106927]
MGP_C57BL6NJ_G0019995	Mycn	bHLH	v-myc avian myelocytomatosis viral related oncogene, neuroblastoma derived [Source:MGI Symbol;Acc:MGI:97357]
MGP_C57BL6NJ_G0027612	Elf2	ETS	E74-like factor 2 [Source:MGI Symbol;Acc:MGI:1916507]
MGP_C57BL6NJ_G0029370	Grhl3	CP2	grainyhead like transcription factor 3 [Source:MGI Symbol;Acc:MGI:2655333]
MGP_C57BL6NJ_G0033989	Thap1	THAP	THAP domain containing, apoptosis associated protein 1 [Source:MGI Symbol;Acc:MGI:1921004]
MGP_C57BL6NJ_G0029891	Mxd4	bHLH	Max dimerization protein 4 [Source:MGI Symbol;Acc:MGI:104991]
MGP_C57BL6NJ_G0018740	Zfp692	zf-C2H2	zinc finger protein 692 [Source:MGI Symbol;Acc:MGI:2144276]
MGP_C57BL6NJ_G0027004	Ovol2	zf-C2H2	ovo like zinc finger 2 [Source:MGI Symbol;Acc:MGI:1338039]
MGP_C57BL6NJ_G0023792	Capn15	Others	calpain 15 [Source:MGI Symbol;Acc:MGI:1355075]
MGP_C57BL6NJ_G0018732	Hand1	bHLH	heart and neural crest derivatives expressed 1 [Source:MGI Symbol;Acc:MGI:103577]
MGP_C57BL6NJ_G0017352	Rcor3	MYB	REST corepressor 3 [Source:MGI Symbol;Acc:MGI:2441920]
MGP_C57BL6NJ_G0023845	Tulp1	Tub	tubby like protein 1 [Source:MGI Symbol;Acc:MGI:109571]
MGP_C57BL6NJ_G0016311	Arid5a	ARID	AT rich interactive domain 5A (MRF1-like) [Source:MGI Symbol;Acc:MGI:2443039]
MGP_C57BL6NJ_G0022213	Klf10	zf-C2H2	Kruppel-like factor 10 [Source:MGI Symbol;Acc:MGI:1101353]
MGP_C57BL6NJ_G0025051	Tbx10	T-box	T-box 10 [Source:MGI Symbol;Acc:MGI:1261436]
MGP_C57BL6NJ_G0021604	Wdhd1	HMG	WD repeat and HMG-box DNA binding protein 1 [Source:MGI Symbol;Acc:MGI:2443514]
MGP_C57BL6NJ_G0029322	Nr0b2	Miscellaneous	nuclear receptor subfamily 0, group B, member 2 [Source:MGI Symbol;Acc:MGI:1346344]
MGP_C57BL6NJ_G0017452	Bclaf1	Others	BCL2-associated transcription factor 1 [Source:MGI Symbol;Acc:MGI:1917580]
MGP_C57BL6NJ_G0031307	Atoh8	bHLH	atonal bHLH transcription factor 8 [Source:MGI Symbol;Acc:MGI:1918343]
MGP_C57BL6NJ_G0020543	Zbtb42	ZBTB	zinc finger and BTB domain containing 42 [Source:MGI Symbol;Acc:MGI:3644133]
MGP_C57BL6NJ_G0032371	Zfp60	zf-C2H2	zinc finger protein 60 [Source:MGI Symbol;Acc:MGI:99207]
MGP_C57BL6NJ_G0035508	Rfx7	RFX	regulatory factor X, 7 [Source:MGI Symbol;Acc:MGI:2442675]
MGP_C57BL6NJ_G0027540	Mynn	ZBTB	myoneurin [Source:MGI Symbol;Acc:MGI:1931415]
MGP_C57BL6NJ_G0017719	Egr2	zf-C2H2	early growth response 2 [Source:MGI Symbol;Acc:MGI:95296]
MGP_C57BL6NJ_G0020512	Rcor1	MYB	REST corepressor 1 [Source:MGI Symbol;Acc:MGI:106340]
MGP_C57BL6NJ_G0019477	Smarce1	HMG	SWI/SNF related, matrix associated, actin dependent regulator of chromatin, subfamily e, member 1 [Source:MGI Symbol;Acc:MGI:1927347]
MGP_C57BL6NJ_G0031211	Neurod6	bHLH	neurogenic differentiation 6 [Source:MGI Symbol;Acc:MGI:106593]
MGP_C57BL6NJ_G0019471	Rara	THR-like	retinoic acid receptor, alpha [Source:MGI Symbol;Acc:MGI:97856]
MGP_C57BL6NJ_G0029791	Kmt2c	HMG	lysine (K)-specific methyltransferase 2C [Source:MGI Symbol;Acc:MGI:2444959]
MGP_C57BL6NJ_G0017600	Prdm1	zf-C2H2	PR domain containing 1, with ZNF domain [Source:MGI Symbol;Acc:MGI:99655]
MGP_C57BL6NJ_G0034116	Hand2	bHLH	heart and neural crest derivatives expressed 2 [Source:MGI Symbol;Acc:MGI:103580]
MGP_C57BL6NJ_G0031186	Hoxa13	Homeobox	homeobox A13 [Source:MGI Symbol;Acc:MGI:96173]
MGP_C57BL6NJ_G0031185	Hoxa11	Homeobox	homeobox A11 [Source:MGI Symbol;Acc:MGI:96172]
MGP_C57BL6NJ_G0031183	Hoxa9	Homeobox	homeobox A9 [Source:MGI Symbol;Acc:MGI:96180]
MGP_C57BL6NJ_G0031182	Hoxa7	Homeobox	homeobox A7 [Source:MGI Symbol;Acc:MGI:96179]
MGP_C57BL6NJ_G0031180	Hoxa5	Homeobox	homeobox A5 [Source:MGI Symbol;Acc:MGI:96177]
MGP_C57BL6NJ_G0019447	Neurod2	bHLH	neurogenic differentiation 2 [Source:MGI Symbol;Acc:MGI:107755]
MGP_C57BL6NJ_G0016429	Satb2	CUT	special AT-rich sequence binding protein 2 [Source:MGI Symbol;Acc:MGI:2679336]
MGP_C57BL6NJ_G0030499	Mlxip	bHLH	MLX interacting protein [Source:MGI Symbol;Acc:MGI:2141183]
MGP_C57BL6NJ_G0031715	Zfp384	zf-C2H2	zinc finger protein 384 [Source:MGI Symbol;Acc:MGI:2443203]
MGP_C57BL6NJ_G0020808	Foxf2	Fork_head	forkhead box F2 [Source:MGI Symbol;Acc:MGI:1347479]
MGP_C57BL6NJ_G0020807	Foxq1	Fork_head	forkhead box Q1 [Source:MGI Symbol;Acc:MGI:1298228]
MGP_C57BL6NJ_G0024661	Egr1	zf-C2H2	early growth response 1 [Source:MGI Symbol;Acc:MGI:95295]
MGP_C57BL6NJ_G0033871	Tfdp1	E2F	transcription factor Dp 1 [Source:MGI Symbol;Acc:MGI:101934]
MGP_C57BL6NJ_G0031030	Parp12	Others	poly (ADP-ribose) polymerase family, member 12 [Source:MGI Symbol;Acc:MGI:2143990]
MGP_C57BL6NJ_G0020887	Jarid2	ARID	jumonji, AT rich interactive domain 2 [Source:MGI Symbol;Acc:MGI:104813]
MGP_C57BL6NJ_G0035505	Zfp280d	Others	zinc finger protein 280D [Source:MGI Symbol;Acc:MGI:2384583]
MGP_C57BL6NJ_G0032661	Atf5	TF_bZIP	activating transcription factor 5 [Source:MGI Symbol;Acc:MGI:2141857]
MGP_C57BL6NJ_G0019412	Sp6	zf-C2H2	trans-acting transcription factor 6 [Source:MGI Symbol;Acc:MGI:1932575]
MGP_C57BL6NJ_G0019406	Nfe2l1	TF_bZIP	nuclear factor, erythroid derived 2,-like 1 [Source:MGI Symbol;Acc:MGI:99421]
MGP_C57BL6NJ_G0028749	Zkscan16	zf-C2H2	zinc finger with KRAB and SCAN domains 16 [Source:MGI Symbol;Acc:MGI:3510405]
MGP_C57BL6NJ_G0031013	Creb3l2	TF_bZIP	cAMP responsive element binding protein 3-like 2 [Source:MGI Symbol;Acc:MGI:2442695]
MGP_C57BL6NJ_G0022242	Trps1	zf-GATA	transcriptional repressor GATA binding 1 [Source:MGI Symbol;Acc:MGI:1927616]
MGP_C57BL6NJ_G0019399	Hoxb4	Homeobox	homeobox B4 [Source:MGI Symbol;Acc:MGI:96185]
MGP_C57BL6NJ_G0019398	Hoxb5	Homeobox	homeobox B5 [Source:MGI Symbol;Acc:MGI:96186]
MGP_C57BL6NJ_G0027438	Gmeb2	SAND	glucocorticoid modulatory element binding protein 2 [Source:MGI Symbol;Acc:MGI:2652836]
MGP_C57BL6NJ_G0026055	Pbx3	Homeobox	pre B cell leukemia homeobox 3 [Source:MGI Symbol;Acc:MGI:97496]
MGP_C57BL6NJ_G0019396	Hoxb7	Homeobox	homeobox B7 [Source:MGI Symbol;Acc:MGI:96188]
MGP_C57BL6NJ_G0026053	Lmx1b	Homeobox	LIM homeobox transcription factor 1 beta [Source:MGI Symbol;Acc:MGI:1100513]
MGP_C57BL6NJ_G0027993	Gabpb2	Others	GA repeat binding protein, beta 2 [Source:MGI Symbol;Acc:MGI:95612]
MGP_C57BL6NJ_G0032902	Zscan2	zf-C2H2	zinc finger and SCAN domain containing 2 [Source:MGI Symbol;Acc:MGI:99176]
MGP_C57BL6NJ_G0024493	Six3	Homeobox	sine oculis-related homeobox 3 [Source:MGI Symbol;Acc:MGI:102764]
MGP_C57BL6NJ_G0019379	Phb	Others	prohibitin [Source:MGI Symbol;Acc:MGI:97572]
MGP_C57BL6NJ_G0034597	Zfhx3	Homeobox	zinc finger homeobox 3 [Source:MGI Symbol;Acc:MGI:99948]
MGP_C57BL6NJ_G0034965	Zfp653	zf-C2H2	zinc finger protein 653 [Source:MGI Symbol;Acc:MGI:2442362]
MGP_C57BL6NJ_G0027420	Tcfl5	bHLH	transcription factor-like 5 (basic helix-loop-helix) [Source:MGI Symbol;Acc:MGI:2672878]
MGP_C57BL6NJ_G0028406	Zzz3	MYB	zinc finger, ZZ domain containing 3 [Source:MGI Symbol;Acc:MGI:1920453]
MGP_C57BL6NJ_G0021443	Zfp503	Others	zinc finger protein 503 [Source:MGI Symbol;Acc:MGI:1353644]
MGP_C57BL6NJ_G0020849	Rreb1	zf-C2H2	ras responsive element binding protein 1 [Source:MGI Symbol;Acc:MGI:2443664]
MGP_C57BL6NJ_G0017501	L3mbtl3	Others	L3MBTL3 histone methyl-lysine binding protein [Source:MGI Symbol;Acc:MGI:2143628]
MGP_C57BL6NJ_G0029799	En2	Homeobox	engrailed 2 [Source:MGI Symbol;Acc:MGI:95390]
MGP_C57BL6NJ_G0024189	Runx2	Runt	runt related transcription factor 2 [Source:MGI Symbol;Acc:MGI:99829]
MGP_C57BL6NJ_G0028788	Akna	Others	AT-hook transcription factor [Source:MGI Symbol;Acc:MGI:2140340]
MGP_C57BL6NJ_G0029985	Rbpj	CSL	recombination signal binding protein for immunoglobulin kappa J region [Source:MGI Symbol;Acc:MGI:96522]
MGP_C57BL6NJ_G0026021	Ciz1	Others	CDKN1A interacting zinc finger protein 1 [Source:MGI Symbol;Acc:MGI:1920234]
MGP_C57BL6NJ_G0020630	Arid4b	ARID	AT rich interactive domain 4B (RBP1-like) [Source:MGI Symbol;Acc:MGI:2137512]
MGP_C57BL6NJ_G0019942	Zfp750	Others	zinc finger protein 750 [Source:MGI Symbol;Acc:MGI:2442210]
MGP_C57BL6NJ_G0019936	Foxk2	Fork_head	forkhead box K2 [Source:MGI Symbol;Acc:MGI:1916087]
MGP_C57BL6NJ_G0016524	Smarcal1	Others	SWI/SNF related matrix associated, actin dependent regulator of chromatin, subfamily a-like 1 [Source:MGI Symbol;Acc:MGI:1859183]
MGP_C57BL6NJ_G0017308	Hlx	Homeobox	H2.0-like homeobox [Source:MGI Symbol;Acc:MGI:96109]
MGP_C57BL6NJ_G0029626	Prdm16	zf-C2H2	PR domain containing 16 [Source:MGI Symbol;Acc:MGI:1917923]
MGP_C57BL6NJ_G0025994	Prrx2	Homeobox	paired related homeobox 2 [Source:MGI Symbol;Acc:MGI:98218]
MGP_C57BL6NJ_G0027330	Znfx1	Others	zinc finger, NFX1-type containing 1 [Source:MGI Symbol;Acc:MGI:2138982]
MGP_C57BL6NJ_G0036010	Foxp3	Fork_head	forkhead box P3 [Source:MGI Symbol;Acc:MGI:1891436]
MGP_C57BL6NJ_G0028703	Zfp189	zf-C2H2	zinc finger protein 189 [Source:MGI Symbol;Acc:MGI:2444707]
MGP_C57BL6NJ_G0023961	Rxrb	RXR-like	retinoid X receptor beta [Source:MGI Symbol;Acc:MGI:98215]
MGP_C57BL6NJ_G0025164	Batf2	TF_bZIP	basic leucine zipper transcription factor, ATF-like 2 [Source:MGI Symbol;Acc:MGI:1921731]
MGP_C57BL6NJ_G0029595	Thap3	THAP	THAP domain containing, apoptosis associated protein 3 [Source:MGI Symbol;Acc:MGI:1917126]
MGP_C57BL6NJ_G0022867	Zfp597	zf-C2H2	zinc finger protein 597 [Source:MGI Symbol;Acc:MGI:1918313]
MGP_C57BL6NJ_G0023453	Olig2	bHLH	oligodendrocyte transcription factor 2 [Source:MGI Symbol;Acc:MGI:1355331]
MGP_C57BL6NJ_G0027305	Zfp335	zf-C2H2	zinc finger protein 335 [Source:MGI Symbol;Acc:MGI:2682313]
MGP_C57BL6NJ_G0030943	Zfp800	zf-C2H2	zinc finger protein 800 [Source:MGI Symbol;Acc:MGI:1889334]
MGP_C57BL6NJ_G0029584	Rere	zf-GATA	arginine glutamic acid dipeptide (RE) repeats [Source:MGI Symbol;Acc:MGI:2683486]
MGP_C57BL6NJ_G0028544	Zfp292	zf-C2H2	zinc finger protein 292 [Source:MGI Symbol;Acc:MGI:1353423]
MGP_C57BL6NJ_G0018250	Stat2	STAT	signal transducer and activator of transcription 2 [Source:MGI Symbol;Acc:MGI:103039]
MGP_C57BL6NJ_G0018242	Baz2a	MBD	bromodomain adjacent to zinc finger domain, 2A [Source:MGI Symbol;Acc:MGI:2151152]
MGP_C57BL6NJ_G0033600	Hmx3	Homeobox	H6 homeobox 3 [Source:MGI Symbol;Acc:MGI:107160]
MGP_C57BL6NJ_G0033598	Ikzf5	zf-C2H2	IKAROS family zinc finger 5 [Source:MGI Symbol;Acc:MGI:1914393]
MGP_C57BL6NJ_G0031935	Arntl2	bHLH	aryl hydrocarbon receptor nuclear translocator-like 2 [Source:MGI Symbol;Acc:MGI:2684845]
MGP_C57BL6NJ_G0028520	Bach2	TF_bZIP	BTB and CNC homology, basic leucine zipper transcription factor 2 [Source:MGI Symbol;Acc:MGI:894679]
MGP_C57BL6NJ_G0027470	Hey1	bHLH	hairy/enhancer-of-split related with YRPW motif 1 [Source:MGI Symbol;Acc:MGI:1341800]
MGP_C57BL6NJ_G0026598	Alx4	Homeobox	aristaless-like homeobox 4 [Source:MGI Symbol;Acc:MGI:108359]
MGP_C57BL6NJ_G0026724	Zfp770	zf-C2H2	zinc finger protein 770 [Source:MGI Symbol;Acc:MGI:2445100]
MGP_C57BL6NJ_G0035640	Zbtb38	ZBTB	zinc finger and BTB domain containing 38 [Source:MGI Symbol;Acc:MGI:2442866]
MGP_C57BL6NJ_G0028501	Prdm13	zf-C2H2	PR domain containing 13 [Source:MGI Symbol;Acc:MGI:2448528]
MGP_C57BL6NJ_G0018582	Sox30	HMG	SRY (sex determining region Y)-box 30 [Source:MGI Symbol;Acc:MGI:1341157]
MGP_C57BL6NJ_G0035458	Zfp609	Others	zinc finger protein 609 [Source:MGI Symbol;Acc:MGI:2674092]
MGP_C57BL6NJ_G0018538	Tlx3	Homeobox	T cell leukemia, homeobox 3 [Source:MGI Symbol;Acc:MGI:1351209]
MGP_C57BL6NJ_G0017105	Mael	HMG	maelstrom spermatogenic transposon silencer [Source:MGI Symbol;Acc:MGI:2138453]
MGP_C57BL6NJ_G0021747	Nrl	TF_bZIP	neural retina leucine zipper gene [Source:MGI Symbol;Acc:MGI:102567]
MGP_C57BL6NJ_G0019003	Camta2	CG-1	calmodulin binding transcription activator 2 [Source:MGI Symbol;Acc:MGI:2135957]
MGP_C57BL6NJ_G0021740	Zfhx2	Homeobox	zinc finger homeobox 2 [Source:MGI Symbol;Acc:MGI:2686934]
MGP_C57BL6NJ_G0021473	Hesx1	Homeobox	homeobox gene expressed in ES cells [Source:MGI Symbol;Acc:MGI:96071]
MGP_C57BL6NJ_G0023493	Erg	ETS	ETS transcription factor [Source:MGI Symbol;Acc:MGI:95415]
MGP_C57BL6NJ_G0032205	Six5	Homeobox	sine oculis-related homeobox 5 [Source:MGI Symbol;Acc:MGI:106220]
MGP_C57BL6NJ_G0032306	Erf	ETS	Ets2 repressor factor [Source:MGI Symbol;Acc:MGI:109637]
MGP_C57BL6NJ_G0032200	Foxa3	Fork_head	forkhead box A3 [Source:MGI Symbol;Acc:MGI:1347477]
MGP_C57BL6NJ_G0025427	Rfx3	RFX	regulatory factor X, 3 (influences HLA class II expression) [Source:MGI Symbol;Acc:MGI:106582]
MGP_C57BL6NJ_G0028313	Tet2	Others	tet methylcytosine dioxygenase 2 [Source:MGI Symbol;Acc:MGI:2443298]
MGP_C57BL6NJ_G0018414	Zmiz2	zf-MIZ	zinc finger, MIZ-type containing 2 [Source:MGI Symbol;Acc:MGI:106374]
MGP_C57BL6NJ_G0025014	Zfp236	zf-C2H2	zinc finger protein 236 [Source:MGI Symbol;Acc:MGI:1926950]
MGP_C57BL6NJ_G0028450	Tox	HMG	thymocyte selection-associated high mobility group box [Source:MGI Symbol;Acc:MGI:2181659]
MGP_C57BL6NJ_G0018934	Sox15	HMG	SRY (sex determining region Y)-box 15 [Source:MGI Symbol;Acc:MGI:98363]
MGP_C57BL6NJ_G0033645	Nkx6-2	Homeobox	NK6 homeobox 2 [Source:MGI Symbol;Acc:MGI:1352738]
MGP_C57BL6NJ_G0032146	Meis3	Homeobox	Meis homeobox 3 [Source:MGI Symbol;Acc:MGI:108519]
MGP_C57BL6NJ_G0016947	Zfp281	zf-C2H2	zinc finger protein 281 [Source:MGI Symbol;Acc:MGI:3029290]
MGP_C57BL6NJ_G0034700	Irf8	IRF	interferon regulatory factor 8 [Source:MGI Symbol;Acc:MGI:96395]
MGP_C57BL6NJ_G0031918	Sox5	HMG	SRY (sex determining region Y)-box 5 [Source:MGI Symbol;Acc:MGI:98367]
MGP_C57BL6NJ_G0024399	L3mbtl4	zf-C2HC	L3MBTL4 histone methyl-lysine binding protein [Source:MGI Symbol;Acc:MGI:2444889]
MGP_C57BL6NJ_G0032136	Crx	TF_Otx	cone-rod homeobox [Source:MGI Symbol;Acc:MGI:1194883]
MGP_C57BL6NJ_G0032135	Obox6	Homeobox	oocyte specific homeobox 6 [Source:MGI Symbol;Acc:MGI:2149036]
MGP_C57BL6NJ_G0036686	Klf8	zf-C2H2	Kruppel-like factor 8 [Source:MGI Symbol;Acc:MGI:2442430]
MGP_C57BL6NJ_G0022077	Zic5	zf-C2H2	zinc finger protein of the cerebellum 5 [Source:MGI Symbol;Acc:MGI:1929518]
MGP_C57BL6NJ_G0021532	Prrxl1	Homeobox	paired related homeobox protein-like 1 [Source:MGI Symbol;Acc:MGI:2148204]
MGP_C57BL6NJ_G0026243	Dlx1	Homeobox	distal-less homeobox 1 [Source:MGI Symbol;Acc:MGI:94901]
MGP_C57BL6NJ_G0030364	Foxn4	Fork_head	forkhead box N4 [Source:MGI Symbol;Acc:MGI:2151057]
MGP_C57BL6NJ_G0020564	Zfp386	zf-C2H2	zinc finger protein 386 (Kruppel-like) [Source:MGI Symbol;Acc:MGI:1930708]
MGP_C57BL6NJ_G0031617	Zfp239	zf-C2H2	zinc finger protein 239 [Source:MGI Symbol;Acc:MGI:1306812]
MGP_C57BL6NJ_G0022536	Csdc2	CSD	cold shock domain containing C2, RNA binding [Source:MGI Symbol;Acc:MGI:2146027]
MGP_C57BL6NJ_G0035009	Nfrkb	Others	nuclear factor related to kappa B binding protein [Source:MGI Symbol;Acc:MGI:2442410]
MGP_C57BL6NJ_G0021347	Isl1	Homeobox	ISL1 transcription factor, LIM/homeodomain [Source:MGI Symbol;Acc:MGI:101791]
MGP_C57BL6NJ_G0020339	Prox2	HPD	prospero homeobox 2 [Source:MGI Symbol;Acc:MGI:1920672]
MGP_C57BL6NJ_G0021501	Pbrm1	HMG	polybromo 1 [Source:MGI Symbol;Acc:MGI:1923998]
MGP_C57BL6NJ_G0025420	Dmrt3	DM	doublesex and mab-3 related transcription factor 3 [Source:MGI Symbol;Acc:MGI:2449470]
MGP_C57BL6NJ_G0027880	Gatad2b	zf-GATA	GATA zinc finger domain containing 2B [Source:MGI Symbol;Acc:MGI:2443225]
MGP_C57BL6NJ_G0022507	Atf4	TF_bZIP	activating transcription factor 4 [Source:MGI Symbol;Acc:MGI:88096]
MGP_C57BL6NJ_G0016232	Prdm14	zf-C2H2	PR domain containing 14 [Source:MGI Symbol;Acc:MGI:3588194]
MGP_C57BL6NJ_G0024922	Zfp532	zf-C2H2	zinc finger protein 532 [Source:MGI Symbol;Acc:MGI:3036282]
MGP_C57BL6NJ_G0026273	Hoxd1	Homeobox	homeobox D1 [Source:MGI Symbol;Acc:MGI:96201]
MGP_C57BL6NJ_G0020320	Zfp410	zf-C2H2	zinc finger protein 410 [Source:MGI Symbol;Acc:MGI:1289280]
MGP_C57BL6NJ_G0029210	Tfap2e	AP-2	transcription factor AP-2, epsilon [Source:MGI Symbol;Acc:MGI:2679630]
MGP_C57BL6NJ_G0035008	Prdm10	zf-C2H2	PR domain containing 10 [Source:MGI Symbol;Acc:MGI:2682952]
MGP_C57BL6NJ_G0026266	Hoxd11	Homeobox	homeobox D11 [Source:MGI Symbol;Acc:MGI:96203]
MGP_C57BL6NJ_G0020318	Elmsan1	Others	ELM2 and Myb/SANT-like domain containing 1 [Source:MGI Symbol;Acc:MGI:2685106]
MGP_C57BL6NJ_G0029721	Dmtf1	MYB	cyclin D binding myb-like transcription factor 1 [Source:MGI Symbol;Acc:MGI:1344415]
MGP_C57BL6NJ_G0017839	Mier2	MYB	MIER family member 2 [Source:MGI Symbol;Acc:MGI:1917677]
MGP_C57BL6NJ_G0030469	Cux2	CUT	cut-like homeobox 2 [Source:MGI Symbol;Acc:MGI:107321]
MGP_C57BL6NJ_G0016258	Tfap2d	AP-2	transcription factor AP-2, delta [Source:MGI Symbol;Acc:MGI:2153466]
MGP_C57BL6NJ_G0022482	Maff	TF_bZIP	v-maf musculoaponeurotic fibrosarcoma oncogene family, protein F (avian) [Source:MGI Symbol;Acc:MGI:96910]
MGP_C57BL6NJ_G0027100	Id1	bHLH	inhibitor of DNA binding 1 [Source:MGI Symbol;Acc:MGI:96396]
MGP_C57BL6NJ_G0034701	Foxf1	Fork_head	forkhead box F1 [Source:MGI Symbol;Acc:MGI:1347470]
MGP_C57BL6NJ_G0027338	Snai1	zf-C2H2	snail family zinc finger 1 [Source:MGI Symbol;Acc:MGI:98330]
MGP_C57BL6NJ_G0036450	Foxo4	Fork_head	forkhead box O4 [Source:MGI Symbol;Acc:MGI:1891915]
MGP_C57BL6NJ_G0035523	Onecut1	CUT	one cut domain, family member 1 [Source:MGI Symbol;Acc:MGI:1196423]
MGP_C57BL6NJ_G0029847	Zfp513	zf-C2H2	zinc finger protein 513 [Source:MGI Symbol;Acc:MGI:2141255]
MGP_C57BL6NJ_G0034171	Zfp866	zf-C2H2	zinc finger protein 866 [Source:MGI Symbol;Acc:MGI:3584369]
MGP_C57BL6NJ_G0019095	Hic1	ZBTB	hypermethylated in cancer 1 [Source:MGI Symbol;Acc:MGI:1338010]
MGP_C57BL6NJ_G0031181	Hoxa6	Homeobox	homeobox A6 [Source:MGI Symbol;Acc:MGI:96178]
MGP_C57BL6NJ_G0032022	Zfp784	zf-C2H2	zinc finger protein 784 [Source:MGI Symbol;Acc:MGI:3606042]
MGP_C57BL6NJ_G0026268	Hoxd9	Homeobox	homeobox D9 [Source:MGI Symbol;Acc:MGI:96210]
MGP_C57BL6NJ_G0032562	Zfp536	zf-C2H2	zinc finger protein 536 [Source:MGI Symbol;Acc:MGI:1926102]
MGP_C57BL6NJ_G0017049	Zbtb37	ZBTB	zinc finger and BTB domain containing 37 [Source:MGI Symbol;Acc:MGI:2444467]
MGP_C57BL6NJ_G0019006	Zfp3	zf-C2H2	zinc finger protein 3 [Source:MGI Symbol;Acc:MGI:99177]
MGP_C57BL6NJ_G0034422	Tox3	HMG	TOX high mobility group box family member 3 [Source:MGI Symbol;Acc:MGI:3039593]
MGP_C57BL6NJ_G0028863	Dmrta1	DM	doublesex and mab-3 related transcription factor like family A1 [Source:MGI Symbol;Acc:MGI:2653627]
MGP_C57BL6NJ_G0025703	Emx2	Homeobox	empty spiracles homeobox 2 [Source:MGI Symbol;Acc:MGI:95388]
MGP_C57BL6NJ_G0024682	Pura	Others	purine rich element binding protein A [Source:MGI Symbol;Acc:MGI:103079]
MGP_C57BL6NJ_G0036133	Nkrf	Others	NF-kappaB repressing factor [Source:MGI Symbol;Acc:MGI:1924536]
MGP_C57BL6NJ_G0027620	Foxo1	Fork_head	forkhead box O1 [Source:MGI Symbol;Acc:MGI:1890077]
MGP_C57BL6NJ_G0021918	Nkx2-6	Homeobox	NK2 homeobox 6 [Source:MGI Symbol;Acc:MGI:97351]
MGP_C57BL6NJ_G0025567	Nkx2-3	Homeobox	NK2 homeobox 3 [Source:MGI Symbol;Acc:MGI:97348]
MGP_C57BL6NJ_G0019127	Bhlha9	bHLH	basic helix-loop-helix family, member a9 [Source:MGI Symbol;Acc:MGI:2444198]
MGP_C57BL6NJ_G0018642	Zfp879	zf-C2H2	zinc finger protein 879 [Source:MGI Symbol;Acc:MGI:3053099]
MGP_C57BL6NJ_G0017688	Neurog3	bHLH	neurogenin 3 [Source:MGI Symbol;Acc:MGI:893591]
MGP_C57BL6NJ_G0032560	Zfp507	zf-C2H2	zinc finger protein 507 [Source:MGI Symbol;Acc:MGI:1916378]
MGP_C57BL6NJ_G0023652	Zfp758	zf-C2H2	zinc finger protein 758 [Source:MGI Symbol;Acc:MGI:2385044]
MGP_C57BL6NJ_G0029017	Foxe3	Fork_head	forkhead box E3 [Source:MGI Symbol;Acc:MGI:1353569]
MGP_C57BL6NJ_G0021546	Zfp488	Others	zinc finger protein 488 [Source:MGI Symbol;Acc:MGI:2686052]
MGP_C57BL6NJ_G0018648	Prop1	Homeobox	paired like homeodomain factor 1 [Source:MGI Symbol;Acc:MGI:109330]
MGP_C57BL6NJ_G0035999	Mycs	bHLH	myc-like oncogene, s-myc protein [Source:MGI Symbol;Acc:MGI:1332242]
MGP_C57BL6NJ_G0018227	Zbtb39	ZBTB	zinc finger and BTB domain containing 39 [Source:MGI Symbol;Acc:MGI:2443316]
MGP_C57BL6NJ_G0022767	Csrnp2	CSRNP_N	cysteine-serine-rich nuclear protein 2 [Source:MGI Symbol;Acc:MGI:2386852]
MGP_C57BL6NJ_G0024979	Zbtb7c	ZBTB	zinc finger and BTB domain containing 7C [Source:MGI Symbol;Acc:MGI:2443302]
MGP_C57BL6NJ_G0026199	Csrnp3	CSRNP_N	cysteine-serine-rich nuclear protein 3 [Source:MGI Symbol;Acc:MGI:1925021]
MGP_C57BL6NJ_G0034612	Zfp612	zf-C2H2	zinc finger protein 612 [Source:MGI Symbol;Acc:MGI:2443465]
MGP_C57BL6NJ_G0018641	Zfp354c	zf-C2H2	zinc finger protein 354C [Source:MGI Symbol;Acc:MGI:1353621]
MGP_C57BL6NJ_G0032039	Zfp444	zf-C2H2	zinc finger protein 444 [Source:MGI Symbol;Acc:MGI:1923365]
MGP_C57BL6NJ_G0021062	Zfp367	zf-C2H2	zinc finger protein 367 [Source:MGI Symbol;Acc:MGI:2442266]
MGP_C57BL6NJ_G0036257	Sox3	HMG	SRY (sex determining region Y)-box 3 [Source:MGI Symbol;Acc:MGI:98365]
MGP_C57BL6NJ_G0033530	Zfp688	zf-C2H2	zinc finger protein 688 [Source:MGI Symbol;Acc:MGI:1916484]
MGP_C57BL6NJ_G0032301	Zfp574	zf-C2H2	zinc finger protein 574 [Source:MGI Symbol;Acc:MGI:2442951]
MGP_C57BL6NJ_G0029112	Zfp691	zf-C2H2	zinc finger protein 691 [Source:MGI Symbol;Acc:MGI:3041163]
MGP_C57BL6NJ_G0029833	Preb	Others	prolactin regulatory element binding [Source:MGI Symbol;Acc:MGI:1355326]
MGP_C57BL6NJ_G0034410	Zfp423	zf-C2H2	zinc finger protein 423 [Source:MGI Symbol;Acc:MGI:1891217]
MGP_C57BL6NJ_G0016428	Hsfy2	HSF	heat shock transcription factor, Y-linked 2 [Source:MGI Symbol;Acc:MGI:1918316]
MGP_C57BL6NJ_G0020142	Insm2	zf-C2H2	insulinoma-associated 2 [Source:MGI Symbol;Acc:MGI:1930787]
MGP_C57BL6NJ_G0031125	Zfp956	zf-C2H2	zinc finger protein 956 [Source:MGI Symbol;Acc:MGI:2141515]
MGP_C57BL6NJ_G0027424	Bhlhe23	bHLH	basic helix-loop-helix family, member e23 [Source:MGI Symbol;Acc:MGI:2153710]
MGP_C57BL6NJ_G0016365	Pou3f3	Pou	POU domain, class 3, transcription factor 3 [Source:MGI Symbol;Acc:MGI:102564]
MGP_C57BL6NJ_G0017898	Onecut3	CUT	one cut domain, family member 3 [Source:MGI Symbol;Acc:MGI:1891409]
MGP_C57BL6NJ_G0034907	Zfp560	zf-C2H2	zinc finger protein 560 [Source:MGI Symbol;Acc:MGI:1915280]
MGP_C57BL6NJ_G0017442	Olig3	bHLH	oligodendrocyte transcription factor 3 [Source:MGI Symbol;Acc:MGI:2149955]
MGP_C57BL6NJ_G0033521	Zfp553	zf-C2H2	zinc finger protein 553 [Source:MGI Symbol;Acc:MGI:2384725]
MGP_C57BL6NJ_G0022674	Dbx2	Homeobox	developing brain homeobox 2 [Source:MGI Symbol;Acc:MGI:107445]
MGP_C57BL6NJ_G0033540	Zfp629	zf-C2H2	zinc finger protein 629 [Source:MGI Symbol;Acc:MGI:2444524]
MGP_C57BL6NJ_G0017468	Tcf21	bHLH	transcription factor 21 [Source:MGI Symbol;Acc:MGI:1202715]
MGP_C57BL6NJ_G0036423	Hsf3	HSF	heat shock transcription factor 3 [Source:MGI Symbol;Acc:MGI:3045337]
MGP_C57BL6NJ_G0024482	Zfp36l2	zf-CCCH	zinc finger protein 36, C3H type-like 2 [Source:MGI Symbol;Acc:MGI:107945]
MGP_C57BL6NJ_G0025097	Npas4	bHLH	neuronal PAS domain protein 4 [Source:MGI Symbol;Acc:MGI:2664186]
MGP_C57BL6NJ_G0024915	Onecut2	CUT	one cut domain, family member 2 [Source:MGI Symbol;Acc:MGI:1891408]
MGP_C57BL6NJ_G0023454	Olig1	bHLH	oligodendrocyte transcription factor 1 [Source:MGI Symbol;Acc:MGI:1355334]
MGP_C57BL6NJ_G0032780	E2f8	E2F	E2F transcription factor 8 [Source:MGI Symbol;Acc:MGI:1922038]
MGP_C57BL6NJ_G0032435	Zfp84	zf-C2H2	zinc finger protein 84 [Source:MGI Symbol;Acc:MGI:107780]
MGP_C57BL6NJ_G0018612	Zfp62	zf-C2H2	zinc finger protein 62 [Source:MGI Symbol;Acc:MGI:99662]
MGP_C57BL6NJ_G0020728	Zfp322a	zf-C2H2	zinc finger protein 322A [Source:MGI Symbol;Acc:MGI:2442566]
MGP_C57BL6NJ_G0027452	Sox18	HMG	SRY (sex determining region Y)-box 18 [Source:MGI Symbol;Acc:MGI:103559]
MGP_C57BL6NJ_G0020068	Ferd3l	bHLH	Fer3 like bHLH transcription factor [Source:MGI Symbol;Acc:MGI:2150010]
MGP_C57BL6NJ_G0036428	Ar	ESR-like	androgen receptor [Source:MGI Symbol;Acc:MGI:88064]
MGP_C57BL6NJ_G0032304	Zfp526	zf-C2H2	zinc finger protein 526 [Source:MGI Symbol;Acc:MGI:2445181]
MGP_C57BL6NJ_G0034479	Zfp319	zf-C2H2	zinc finger protein 319 [Source:MGI Symbol;Acc:MGI:1890618]
MGP_C57BL6NJ_G0029945	Zfp518b	zf-C2H2	zinc finger protein 518B [Source:MGI Symbol;Acc:MGI:2140750]
MGP_C57BL6NJ_G0030757	Zfp316	zf-C2H2	zinc finger protein 316 [Source:MGI Symbol;Acc:MGI:1860402]
MGP_C57BL6NJ_G0023826	Hmga1	HMGA	high mobility group AT-hook 1 [Source:MGI Symbol;Acc:MGI:96160]
MGP_C57BL6NJ_G0034703	Foxc2	Fork_head	forkhead box C2 [Source:MGI Symbol;Acc:MGI:1347481]
MGP_C57BL6NJ_G0032038	Zfp787	zf-C2H2	zinc finger protein 787 [Source:MGI Symbol;Acc:MGI:1914359]
MGP_C57BL6NJ_G0036703	Mbtps2	zf-C2H2	membrane-bound transcription factor peptidase, site 2 [Source:MGI Symbol;Acc:MGI:2444506]
MGP_C57BL6NJ_G0024841	Zfp474	zf-C2H2	zinc finger protein 474 [Source:MGI Symbol;Acc:MGI:1914008]
MGP_C57BL6NJ_G0022818	Zfp740	zf-C2H2	zinc finger protein 740 [Source:MGI Symbol;Acc:MGI:1915994]
MGP_C57BL6NJ_G0021205	Spz1	Others	spermatogenic leucine zipper 1 [Source:MGI Symbol;Acc:MGI:1930801]
MGP_C57BL6NJ_G0023513	Zbtb21	ZBTB	zinc finger and BTB domain containing 21 [Source:MGI Symbol;Acc:MGI:1927240]
MGP_C57BL6NJ_G0025016	Tshz1	zf-C2H2	teashirt zinc finger family member 1 [Source:MGI Symbol;Acc:MGI:1346031]
MGP_C57BL6NJ_G0019988	Msgn1	bHLH	mesogenin 1 [Source:MGI Symbol;Acc:MGI:1860483]
MGP_C57BL6NJ_G0022362	Zfp41	zf-C2H2	zinc finger protein 41 [Source:MGI Symbol;Acc:MGI:99186]
MGP_C57BL6NJ_G0035964	Zfp445	zf-C2H2	zinc finger protein 445 [Source:MGI Symbol;Acc:MGI:2143340]
MGP_C57BL6NJ_G0023359	Zfp654	zf-C2H2	zinc finger protein 654 [Source:MGI Symbol;Acc:MGI:1919270]
MGP_C57BL6NJ_G0028997	Dmrta2	DM	doublesex and mab-3 related transcription factor like family A2 [Source:MGI Symbol;Acc:MGI:2653629]
MGP_C57BL6NJ_G0034082	Helt	bHLH	helt bHLH transcription factor [Source:MGI Symbol;Acc:MGI:3040955]
MGP_C57BL6NJ_G0033797	Zfp358	zf-C2H2	zinc finger protein 358 [Source:MGI Symbol;Acc:MGI:2153740]
MGP_C57BL6NJ_G0018854	Zfp286	zf-C2H2	zinc finger protein 286 [Source:MGI Symbol;Acc:MGI:2384758]
MGP_C57BL6NJ_G0033526	Zfp768	zf-C2H2	zinc finger protein 768 [Source:MGI Symbol;Acc:MGI:2384582]
MGP_C57BL6NJ_G0024405	Tgif1	Homeobox	TGFB-induced factor homeobox 1 [Source:MGI Symbol;Acc:MGI:1194497]
MGP_C57BL6NJ_G0035005	Zbtb44	ZBTB	zinc finger and BTB domain containing 44 [Source:MGI Symbol;Acc:MGI:1925123]
MGP_C57BL6NJ_G0032436	Zfp30	zf-C2H2	zinc finger protein 30 [Source:MGI Symbol;Acc:MGI:99178]
MGP_C57BL6NJ_G0020172	Mis18bp1	MYB	MIS18 binding protein 1 [Source:MGI Symbol;Acc:MGI:2145099]
MGP_C57BL6NJ_G0022365	Mafa	TF_bZIP	v-maf musculoaponeurotic fibrosarcoma oncogene family, protein A (avian) [Source:MGI Symbol;Acc:MGI:2673307]
MGP_C57BL6NJ_G0032266	Zfp235	zf-C2H2	zinc finger protein 235 [Source:MGI Symbol;Acc:MGI:1929117]
MGP_C57BL6NJ_G0018035	Nr1h4	THR-like	nuclear receptor subfamily 1, group H, member 4 [Source:MGI Symbol;Acc:MGI:1352464]
MGP_C57BL6NJ_G0018546	Foxi1	Fork_head	forkhead box I1 [Source:MGI Symbol;Acc:MGI:1096329]
MGP_C57BL6NJ_G0027355	Tshz2	zf-C2H2	teashirt zinc finger family member 2 [Source:MGI Symbol;Acc:MGI:2153084]
MGP_C57BL6NJ_G0029633	Hes5	bHLH	hes family bHLH transcription factor 5 [Source:MGI Symbol;Acc:MGI:104876]
MGP_C57BL6NJ_G0032659	Zfp473	zf-C2H2	zinc finger protein 473 [Source:MGI Symbol;Acc:MGI:2442697]
MGP_C57BL6NJ_G0018343	Neurod4	bHLH	neurogenic differentiation 4 [Source:MGI Symbol;Acc:MGI:108055]
MGP_C57BL6NJ_G0036161	Zbtb33	ZBTB	zinc finger and BTB domain containing 33 [Source:MGI Symbol;Acc:MGI:1927290]
MGP_C57BL6NJ_G0020204	Arid4a	ARID	AT rich interactive domain 4A (RBP1-like) [Source:MGI Symbol;Acc:MGI:2444354]
MGP_C57BL6NJ_G0025421	Dmrt2	DM	doublesex and mab-3 related transcription factor 2 [Source:MGI Symbol;Acc:MGI:1330307]
MGP_C57BL6NJ_G0023809	Crebrf	Others	CREB3 regulatory factor [Source:MGI Symbol;Acc:MGI:1924378]
MGP_C57BL6NJ_G0020484	Rit1	zf-C2H2	B cell leukemia/lymphoma 11B [Source:MGI Symbol;Acc:MGI:1929913]
MGP_C57BL6NJ_G0021108	Zfp738	zf-C2H2	zinc finger protein 738 [Source:MGI Symbol;Acc:MGI:3040706]
MGP_C57BL6NJ_G0022038	Pou4f1	Pou	POU domain, class 4, transcription factor 1 [Source:MGI Symbol;Acc:MGI:102525]
MGP_C57BL6NJ_G0033627	Foxi2	Fork_head	forkhead box I2 [Source:MGI Symbol;Acc:MGI:3028075]
MGP_C57BL6NJ_G0022403	Scrt1	zf-C2H2	scratch family zinc finger 1 [Source:MGI Symbol;Acc:MGI:2176606]
MGP_C57BL6NJ_G0019984	Osr1	zf-C2H2	odd-skipped related transcription factor 1 [Source:MGI Symbol;Acc:MGI:1344424]
MGP_C57BL6NJ_G0016797	Gli2	zf-C2H2	GLI-Kruppel family member GLI2 [Source:MGI Symbol;Acc:MGI:95728]
MGP_C57BL6NJ_G0025018	Zfp407	zf-C2H2	zinc finger protein 407 [Source:MGI Symbol;Acc:MGI:2685179]
MGP_C57BL6NJ_G0029935	Msx1	Homeobox	msh homeobox 1 [Source:MGI Symbol;Acc:MGI:97168]
MGP_C57BL6NJ_G0029246	Zbtb8b	ZBTB	zinc finger and BTB domain containing 8b [Source:MGI Symbol;Acc:MGI:2387181]
MGP_C57BL6NJ_G0021463	Duxbl1	Homeobox	double homeobox B-like 1 [Source:MGI Symbol;Acc:MGI:1916048]
MGP_C57BL6NJ_G0033607	Nkx1-2	Homeobox	NK1 homeobox 2 [Source:MGI Symbol;Acc:MGI:104806]
MGP_C57BL6NJ_G0028094	Nhlh2	bHLH	nescient helix loop helix 2 [Source:MGI Symbol;Acc:MGI:97324]
MGP_C57BL6NJ_G0020574	Sp8	zf-C2H2	trans-acting transcription factor 8 [Source:MGI Symbol;Acc:MGI:2443471]
MGP_C57BL6NJ_G0029077	Klf17	zf-C2H2	Kruppel-like factor 17 [Source:MGI Symbol;Acc:MGI:2181068]
MGP_C57BL6NJ_G0029226	Hmgb4	HMG	high-mobility group box 4 [Source:MGI Symbol;Acc:MGI:1916567]
MGP_C57BL6NJ_G0018644	Zfp454	zf-C2H2	zinc finger protein 454 [Source:MGI Symbol;Acc:MGI:2679253]
MGP_C57BL6NJ_G0017581	Foxo3	Fork_head	forkhead box O3 [Source:MGI Symbol;Acc:MGI:1890081]
MGP_C57BL6NJ_G0019400	Hoxb3	Homeobox	homeobox B3 [Source:MGI Symbol;Acc:MGI:96184]
MGP_C57BL6NJ_G0032884	Zfp710	zf-C2H2	zinc finger protein 710 [Source:MGI Symbol;Acc:MGI:1921747]
MGP_C57BL6NJ_G0020999	Neurog1	bHLH	neurogenin 1 [Source:MGI Symbol;Acc:MGI:107754]
MGP_C57BL6NJ_G0033531	Zfp689	zf-C2H2	zinc finger protein 689 [Source:MGI Symbol;Acc:MGI:1918381]
MGP_C57BL6NJ_G0028101	Nr1h5	THR-like	nuclear receptor subfamily 1, group H, member 5 [Source:MGI Symbol;Acc:MGI:3026618]
MGP_C57BL6NJ_G0034013	Purg	Others	purine-rich element binding protein G [Source:MGI Symbol;Acc:MGI:1922279]
MGP_C57BL6NJ_G0021687	Zfp219	zf-C2H2	zinc finger protein 219 [Source:MGI Symbol;Acc:MGI:1917140]
MGP_C57BL6NJ_G0018645	Zfp2	zf-C2H2	zinc finger protein 2 [Source:MGI Symbol;Acc:MGI:99167]
MGP_C57BL6NJ_G0029333	Zfp683	zf-C2H2	zinc finger protein 683 [Source:MGI Symbol;Acc:MGI:3650254]
MGP_C57BL6NJ_G0032449	Zfp260	zf-C2H2	zinc finger protein 260 [Source:MGI Symbol;Acc:MGI:1347071]
MGP_C57BL6NJ_G0018681	Aff4	AF-4	AF4/FMR2 family, member 4 [Source:MGI Symbol;Acc:MGI:2136171]
MGP_C57BL6NJ_G0021697	Sall2	zf-C2H2	spalt like transcription factor 2 [Source:MGI Symbol;Acc:MGI:1354373]
MGP_C57BL6NJ_G0034714	Zfpm1	zf-C2H2	zinc finger protein, multitype 1 [Source:MGI Symbol;Acc:MGI:1095400]
MGP_C57BL6NJ_G0032103	Zbtb45	ZBTB	zinc finger and BTB domain containing 45 [Source:MGI Symbol;Acc:MGI:2685003]
MGP_C57BL6NJ_G0019393	Hoxb13	Homeobox	homeobox B13 [Source:MGI Symbol;Acc:MGI:107730]
MGP_C57BL6NJ_G0030261	Zfp644	zf-C2H2	zinc finger protein 644 [Source:MGI Symbol;Acc:MGI:1277212]
MGP_C57BL6NJ_G0028656	Zbtb5	ZBTB	zinc finger and BTB domain containing 5 [Source:MGI Symbol;Acc:MGI:1924601]
MGP_C57BL6NJ_G0024402	Zbtb14	ZBTB	zinc finger and BTB domain containing 14 [Source:MGI Symbol;Acc:MGI:1195345]
MGP_C57BL6NJ_G0029949	Nkx3-2	Homeobox	NK3 homeobox 2 [Source:MGI Symbol;Acc:MGI:108015]
MGP_C57BL6NJ_G0033551	Zfp668	zf-C2H2	zinc finger protein 668 [Source:MGI Symbol;Acc:MGI:2442943]
MGP_C57BL6NJ_G0033552	Zfp646	zf-C2H2	zinc finger protein 646 [Source:MGI Symbol;Acc:MGI:3665412]
MGP_C57BL6NJ_G0018741	Zfp672	zf-C2H2	zinc finger protein 672 [Source:MGI Symbol;Acc:MGI:2442105]
MGP_C57BL6NJ_G0017770	Zfp280b	Others	zinc finger protein 280B [Source:MGI Symbol;Acc:MGI:1927865]
MGP_C57BL6NJ_G0024003	Zbtb12	ZBTB	zinc finger and BTB domain containing 12 [Source:MGI Symbol;Acc:MGI:88133]
MGP_C57BL6NJ_G0029146	Rlf	zf-C2H2	rearranged L-myc fusion sequence [Source:MGI Symbol;Acc:MGI:1924705]
MGP_C57BL6NJ_G0028070	Zfp697	zf-C2H2	zinc finger protein 697 [Source:MGI Symbol;Acc:MGI:2139736]
MGP_C57BL6NJ_G0033601	Hmx2	Homeobox	H6 homeobox 2 [Source:MGI Symbol;Acc:MGI:107159]
MGP_C57BL6NJ_G0036160	Rhox13	Homeobox	reproductive homeobox 13 [Source:MGI Symbol;Acc:MGI:1920864]
MGP_C57BL6NJ_G0022990	Hic2	ZBTB	hypermethylated in cancer 2 [Source:MGI Symbol;Acc:MGI:1929869]
MGP_C57BL6NJ_G0020809	Foxc1	Fork_head	forkhead box C1 [Source:MGI Symbol;Acc:MGI:1347466]
MGP_C57BL6NJ_G0022840	Hoxc12	Homeobox	homeobox C12 [Source:MGI Symbol;Acc:MGI:96194]
MGP_C57BL6NJ_G0026267	Hoxd10	Homeobox	homeobox D10 [Source:MGI Symbol;Acc:MGI:96202]
MGP_C57BL6NJ_G0035656	Foxl2	Fork_head	forkhead box L2 [Source:MGI Symbol;Acc:MGI:1349428]
MGP_C57BL6NJ_G0024043	Tcf19	Others	transcription factor 19 [Source:MGI Symbol;Acc:MGI:103180]
MGP_C57BL6NJ_G0027394	Zfp831	zf-C2H2	zinc finger protein 831 [Source:MGI Symbol;Acc:MGI:3641861]
MGP_C57BL6NJ_G0032270	Zfp61	zf-C2H2	zinc finger protein 61 [Source:MGI Symbol;Acc:MGI:99663]
MGP_C57BL6NJ_G0026804	Zscan29	zf-C2H2	zinc finger SCAN domains 29 [Source:MGI Symbol;Acc:MGI:2139317]
MGP_C57BL6NJ_G0026113	Zbtb26	ZBTB	zinc finger and BTB domain containing 26 [Source:MGI Symbol;Acc:MGI:2444402]
MGP_C57BL6NJ_G0022374	Zfp623	zf-C2H2	zinc finger protein 623 [Source:MGI Symbol;Acc:MGI:1926084]
MGP_C57BL6NJ_G0032438	Zfp940	zf-C2H2	zinc finger protein 940 [Source:MGI Symbol;Acc:MGI:2446235]
MGP_C57BL6NJ_G0021259	Zfp366	zf-C2H2	zinc finger protein 366 [Source:MGI Symbol;Acc:MGI:2178429]
MGP_C57BL6NJ_G0024533	Zfp438	zf-C2H2	zinc finger protein 438 [Source:MGI Symbol;Acc:MGI:2444919]
MGP_C57BL6NJ_G0020906	Zfp169	zf-C2H2	zinc finger protein 169 [Source:MGI Symbol;Acc:MGI:1915161]
MGP_C57BL6NJ_G0029332	Lin28a	CSD	lin-28 homolog A (C. elegans) [Source:MGI Symbol;Acc:MGI:1890546]
MGP_C57BL6NJ_G0030557	Zfp11	zf-C2H2	zinc finger protein 11 [Source:MGI Symbol;Acc:MGI:99156]
MGP_C57BL6NJ_G0021089	Zfp455	zf-C2H2	zinc finger protein 455 [Source:MGI Symbol;Acc:MGI:3040708]
MGP_C57BL6NJ_G0036158	Rhox11	Homeobox	reproductive homeobox 11 [Source:MGI Symbol;Acc:MGI:2681831]
MGP_C57BL6NJ_G0027345	Adnp	Homeobox	activity-dependent neuroprotective protein [Source:MGI Symbol;Acc:MGI:1338758]
MGP_C57BL6NJ_G0034060	Zfp42	zf-C2H2	zinc finger protein 42 [Source:MGI Symbol;Acc:MGI:99187]
MGP_C57BL6NJ_G0032018	Zfp524	zf-C2H2	zinc finger protein 524 [Source:MGI Symbol;Acc:MGI:1916740]
MGP_C57BL6NJ_G0017177	Nhlh1	bHLH	nescient helix loop helix 1 [Source:MGI Symbol;Acc:MGI:98481]
MGP_C57BL6NJ_G0023639	Zfp52	zf-C2H2	zinc finger protein 52 [Source:MGI Symbol;Acc:MGI:99199]
MGP_C57BL6NJ_G0029388	Zfp46	zf-C2H2	zinc finger protein 46 [Source:MGI Symbol;Acc:MGI:99192]
MGP_C57BL6NJ_G0020222	Six1	Homeobox	sine oculis-related homeobox 1 [Source:MGI Symbol;Acc:MGI:102780]
MGP_C57BL6NJ_G0023948	Zbtb22	ZBTB	zinc finger and BTB domain containing 22 [Source:MGI Symbol;Acc:MGI:1931870]
MGP_C57BL6NJ_G0027114	Plagl2	zf-C2H2	pleiomorphic adenoma gene-like 2 [Source:MGI Symbol;Acc:MGI:1933165]
MGP_C57BL6NJ_G0032990	Crebzf	TF_bZIP	CREB/ATF bZIP transcription factor [Source:MGI Symbol;Acc:MGI:2675296]
MGP_C57BL6NJ_G0024604	Zfp24	zf-C2H2	zinc finger protein 24 [Source:MGI Symbol;Acc:MGI:1929704]
MGP_C57BL6NJ_G0025415	Foxd4	Fork_head	forkhead box D4 [Source:MGI Symbol;Acc:MGI:1347467]
MGP_C57BL6NJ_G0031121	Zfp786	zf-C2H2	zinc finger protein 786 [Source:MGI Symbol;Acc:MGI:3026883]
MGP_C57BL6NJ_G0019908	Mafg	TF_bZIP	v-maf musculoaponeurotic fibrosarcoma oncogene family, protein G (avian) [Source:MGI Symbol;Acc:MGI:96911]
MGP_C57BL6NJ_G0032016	Zfp579	zf-C2H2	zinc finger protein 579 [Source:MGI Symbol;Acc:MGI:1915740]
MGP_C57BL6NJ_G0027082	Sox12	HMG	SRY (sex determining region Y)-box 12 [Source:MGI Symbol;Acc:MGI:98360]
MGP_C57BL6NJ_G0036150	Rhox2a	Homeobox	reproductive homeobox 2A [Source:MGI Symbol;Acc:MGI:1922449]
MGP_C57BL6NJ_G0033381	Sox6	HMG	SRY (sex determining region Y)-box 6 [Source:MGI Symbol;Acc:MGI:98368]
MGP_C57BL6NJ_G0023586	Prdm9	zf-C2H2	PR domain containing 9 [Source:MGI Symbol;Acc:MGI:2384854]
MGP_C57BL6NJ_G0032816	Klf13	zf-C2H2	Kruppel-like factor 13 [Source:MGI Symbol;Acc:MGI:1354948]
MGP_C57BL6NJ_G0027356	Zfp217	zf-C2H2	zinc finger protein 217 [Source:MGI Symbol;Acc:MGI:2685408]
MGP_C57BL6NJ_G0029131	Foxo6	Fork_head	forkhead box O6 [Source:MGI Symbol;Acc:MGI:2676586]
MGP_C57BL6NJ_G0022158	Zfp622	zf-C2H2	zinc finger protein 622 [Source:MGI Symbol;Acc:MGI:1289282]
MGP_C57BL6NJ_G0030777	Bhlha15	bHLH	basic helix-loop-helix family, member a15 [Source:MGI Symbol;Acc:MGI:891976]
MGP_C57BL6NJ_G0022835	Gm28047	TF_bZIP	predicted gene, 28047 [Source:MGI Symbol;Acc:MGI:5547783]
MGP_C57BL6NJ_G0021724	Cebpe	TF_bZIP	CCAAT/enhancer binding protein (C/EBP), epsilon [Source:MGI Symbol;Acc:MGI:103572]
MGP_C57BL6NJ_G0034264	Zfp961	zf-C2H2	zinc finger protein 961 [Source:MGI Symbol;Acc:MGI:3583954]
MGP_C57BL6NJ_G0017120	Pbx1	Homeobox	pre B cell leukemia homeobox 1 [Source:MGI Symbol;Acc:MGI:97495]
MGP_C57BL6NJ_G0032265	Zfp112	zf-C2H2	zinc finger protein 112 [Source:MGI Symbol;Acc:MGI:1929115]
MGP_C57BL6NJ_G0036574	Zmat1	zf-C2H2	zinc finger, matrin type 1 [Source:MGI Symbol;Acc:MGI:2442284]
MGP_C57BL6NJ_G0028876	Jun	TF_bZIP	jun proto-oncogene [Source:MGI Symbol;Acc:MGI:96646]
MGP_C57BL6NJ_G0024851	Zfp608	Others	zinc finger protein 608 [Source:MGI Symbol;Acc:MGI:2442338]
MGP_C57BL6NJ_G0031136	Repin1	zf-C2H2	replication initiator 1 [Source:MGI Symbol;Acc:MGI:1889817]
MGP_C57BL6NJ_G0031124	Zfp212	zf-C2H2	Zinc finger protein 212 [Source:MGI Symbol;Acc:MGI:2682609]
MGP_C57BL6NJ_G0034380	Junb	TF_bZIP	jun B proto-oncogene [Source:MGI Symbol;Acc:MGI:96647]
MGP_C57BL6NJ_G0025428	Glis3	zf-C2H2	GLIS family zinc finger 3 [Source:MGI Symbol;Acc:MGI:2444289]
MGP_C57BL6NJ_G0031191	Creb5	TF_bZIP	cAMP responsive element binding protein 5 [Source:MGI Symbol;Acc:MGI:2443973]
MGP_C57BL6NJ_G0025204	2700081O15Rik	zf-BED	RIKEN cDNA 2700081O15 gene [Source:MGI Symbol;Acc:MGI:1919667]
MGP_C57BL6NJ_G0030822	Gsx1	Homeobox	GS homeobox 1 [Source:MGI Symbol;Acc:MGI:95842]
MGP_C57BL6NJ_G0031139	AI854703	zf-C2H2	expressed sequence AI854703 [Source:MGI Symbol;Acc:MGI:2141510]
MGP_C57BL6NJ_G0023647	Zfp943	zf-C2H2	zinc finger prtoein 943 [Source:MGI Symbol;Acc:MGI:1921920]
MGP_C57BL6NJ_G0023924	Zfp952	zf-C2H2	zinc finger protein 952 [Source:MGI Symbol;Acc:MGI:2441928]
MGP_C57BL6NJ_G0024951	Tcf4	bHLH	transcription factor 4 [Source:MGI Symbol;Acc:MGI:98506]
MGP_C57BL6NJ_G0026920	Ebf4	COE	early B cell factor 4 [Source:MGI Symbol;Acc:MGI:2385972]
MGP_C57BL6NJ_G0023923	Zfp472	zf-C2H2	zinc finger protein 472 [Source:MGI Symbol;Acc:MGI:2385049]
MGP_C57BL6NJ_G0035669	Sox14	HMG	SRY (sex determining region Y)-box 14 [Source:MGI Symbol;Acc:MGI:98362]
MGP_C57BL6NJ_G0036157	Rhox10	Homeobox	reproductive homeobox 10 [Source:MGI Symbol;Acc:MGI:3580249]
MGP_C57BL6NJ_G0025001	Adnp2	Others	ADNP homeobox 2 [Source:MGI Symbol;Acc:MGI:2448562]
MGP_C57BL6NJ_G0032445	Zfp14	zf-C2H2	zinc finger protein 14 [Source:MGI Symbol;Acc:MGI:99160]
MGP_C57BL6NJ_G0027023	Nkx2-4	Homeobox	NK2 homeobox 4 [Source:MGI Symbol;Acc:MGI:97349]
MGP_C57BL6NJ_G0034374	Klf1	zf-C2H2	Kruppel-like factor 1 (erythroid) [Source:MGI Symbol;Acc:MGI:1342771]
MGP_C57BL6NJ_G0027828	Gon4l	Others	gon-4-like (C.elegans) [Source:MGI Symbol;Acc:MGI:1917579]
MGP_C57BL6NJ_G0032132	Obox1	Homeobox	oocyte specific homeobox 1 [Source:MGI Symbol;Acc:MGI:1918718]
MGP_C57BL6NJ_G0035165	Bsx	Homeobox	brain specific homeobox [Source:MGI Symbol;Acc:MGI:2669849]
MGP_C57BL6NJ_G0018791	Zfp867	zf-C2H2	zinc finger protein 867 [Source:MGI Symbol;Acc:MGI:2681848]
MGP_C57BL6NJ_G0034168	Zfp869	zf-C2H2	zinc finger protein 869 [Source:MGI Symbol;Acc:MGI:1914119]
MGP_C57BL6NJ_G0032097	Zscan22	zf-C2H2	zinc finger and SCAN domain containing 22 [Source:MGI Symbol;Acc:MGI:2443312]
MGP_C57BL6NJ_G0033522	Zfp771	zf-C2H2	zinc finger protein 771 [Source:MGI Symbol;Acc:MGI:2442050]
MGP_C57BL6NJ_G0034119	Hmgb2	HMG	high mobility group box 2 [Source:MGI Symbol;Acc:MGI:96157]
MGP_C57BL6NJ_G0036109	Zfp182	zf-C2H2	zinc finger protein 182 [Source:MGI Symbol;Acc:MGI:2442220]
MGP_C57BL6NJ_G0032043	Zfp667	zf-C2H2	zinc finger protein 667 [Source:MGI Symbol;Acc:MGI:2442757]
MGP_C57BL6NJ_G0020666	Zkscan4	zf-C2H2	zinc finger with KRAB and SCAN domains 4 [Source:MGI Symbol;Acc:MGI:3649412]
MGP_C57BL6NJ_G0022866	Zfp174	zf-C2H2	zinc finger protein 174 [Source:MGI Symbol;Acc:MGI:2686600]
MGP_C57BL6NJ_G0022424	Zfp647	zf-C2H2	zinc finger protein 647 [Source:MGI Symbol;Acc:MGI:3052806]
MGP_C57BL6NJ_G0017953	Nfic	CTF/NFI	nuclear factor I/C [Source:MGI Symbol;Acc:MGI:109591]
MGP_C57BL6NJ_G0032607	Zfp819	zf-C2H2	zinc finger protein 819 [Source:MGI Symbol;Acc:MGI:1921650]
MGP_C57BL6NJ_G0033367	Arntl	bHLH	aryl hydrocarbon receptor nuclear translocator-like [Source:MGI Symbol;Acc:MGI:1096381]
MGP_C57BL6NJ_G0034275	Klf2	zf-C2H2	Kruppel-like factor 2 (lung) [Source:MGI Symbol;Acc:MGI:1342772]
MGP_C57BL6NJ_G0032046	Zfp78	zf-C2H2	zinc finger protein 78 [Source:MGI Symbol;Acc:MGI:107783]
MGP_C57BL6NJ_G0016556	Fev	ETS	FEV (ETS oncogene family) [Source:MGI Symbol;Acc:MGI:2449712]
MGP_C57BL6NJ_G0023918	Zfp811	zf-C2H2	zinc finger protein 811 [Source:MGI Symbol;Acc:MGI:2682944]
MGP_C57BL6NJ_G0029016	Foxd2	Fork_head	forkhead box D2 [Source:MGI Symbol;Acc:MGI:1347471]
MGP_C57BL6NJ_G0023934	Zfp101	zf-C2H2	zinc finger protein 101 [Source:MGI Symbol;Acc:MGI:107547]
MGP_C57BL6NJ_G0033365	Tead1	TEA	TEA domain family member 1 [Source:MGI Symbol;Acc:MGI:101876]
MGP_C57BL6NJ_G0021091	Zfp457	zf-C2H2	zinc finger protein 457 [Source:MGI Symbol;Acc:MGI:2664334]
MGP_C57BL6NJ_G0034656	Maf	TF_bZIP	avian musculoaponeurotic fibrosarcoma oncogene homolog [Source:MGI Symbol;Acc:MGI:96909]
MGP_C57BL6NJ_G0021090	Zfp458	zf-C2H2	zinc finger protein 458 [Source:MGI Symbol;Acc:MGI:3040691]
MGP_C57BL6NJ_G0021099	Zfp459	zf-C2H2	zinc finger protein 459 [Source:MGI Symbol;Acc:MGI:3040701]
MGP_C57BL6NJ_G0032023	Zfp580	zf-C2H2	zinc finger protein 580 [Source:MGI Symbol;Acc:MGI:1916242]
MGP_C57BL6NJ_G0022017	Dach1	DACH	dachshund family transcription factor 1 [Source:MGI Symbol;Acc:MGI:1277991]
MGP_C57BL6NJ_G0031322	Tcf7l1	HMG	transcription factor 7 like 1 (T cell specific, HMG box) [Source:MGI Symbol;Acc:MGI:1202876]
MGP_C57BL6NJ_G0024480	Mta3	zf-GATA	metastasis associated 3 [Source:MGI Symbol;Acc:MGI:2151172]
MGP_C57BL6NJ_G0034637	Zfp1	zf-C2H2	zinc finger protein 1 [Source:MGI Symbol;Acc:MGI:99154]
MGP_C57BL6NJ_G0031290	Foxi3	Fork_head	forkhead box I3 [Source:MGI Symbol;Acc:MGI:3511278]
MGP_C57BL6NJ_G0020095	Zfp277	zf-C2H2	zinc finger protein 277 [Source:MGI Symbol;Acc:MGI:1890393]
MGP_C57BL6NJ_G0032131	Obox7	Homeobox	oocyte specific homeobox 7 [Source:MGI Symbol;Acc:MGI:3646231]
MGP_C57BL6NJ_G0030794	Zkscan5	zf-C2H2	zinc finger with KRAB and SCAN domains 5 [Source:MGI Symbol;Acc:MGI:107533]
MGP_C57BL6NJ_G0030702	A430033K04Rik	zf-C2H2	RIKEN cDNA A430033K04 gene [Source:MGI Symbol;Acc:MGI:3583896]
MGP_C57BL6NJ_G0034261	Zfp709	zf-C2H2	zinc finger protein 709 [Source:MGI Symbol;Acc:MGI:2384299]
MGP_C57BL6NJ_G0032545	Cebpg	TF_bZIP	CCAAT/enhancer binding protein (C/EBP), gamma [Source:MGI Symbol;Acc:MGI:104982]
MGP_C57BL6NJ_G0029532	Zfp981	zf-C2H2	zinc finger protein 981 [Source:MGI Symbol;Acc:MGI:3700965]
MGP_C57BL6NJ_G0032571	AI987944	zf-C2H2	expressed sequence AI987944 [Source:MGI Symbol;Acc:MGI:2142079]
MGP_C57BL6NJ_G0020245	Zbtb25	ZBTB	zinc finger and BTB domain containing 25 [Source:MGI Symbol;Acc:MGI:99197]
MGP_C57BL6NJ_G0030741	Foxk1	Fork_head	forkhead box K1 [Source:MGI Symbol;Acc:MGI:1347488]
MGP_C57BL6NJ_G0027341	Cebpb	TF_bZIP	CCAAT/enhancer binding protein (C/EBP), beta [Source:MGI Symbol;Acc:MGI:88373]
MGP_C57BL6NJ_G0032605	Zfp658	zf-C2H2	zinc finger protein 658 [Source:MGI Symbol;Acc:MGI:2652821]
MGP_C57BL6NJ_G0019395	Hoxb8	Homeobox	homeobox B8 [Source:MGI Symbol;Acc:MGI:96189]
MGP_C57BL6NJ_G0020943	Nfil3	TF_bZIP	nuclear factor, interleukin 3, regulated [Source:MGI Symbol;Acc:MGI:109495]
MGP_C57BL6NJ_G0018169	Hmga2	HMGA	high mobility group AT-hook 2 [Source:MGI Symbol;Acc:MGI:101761]
MGP_C57BL6NJ_G0027314	Zfp663	zf-C2H2	zinc finger protein 663 [Source:MGI Symbol;Acc:MGI:2685854]
MGP_C57BL6NJ_G0025379	Foxb2	Fork_head	forkhead box B2 [Source:MGI Symbol;Acc:MGI:1347468]
MGP_C57BL6NJ_G0036520	Pou3f4	Pou	POU domain, class 3, transcription factor 4 [Source:MGI Symbol;Acc:MGI:101894]
MGP_C57BL6NJ_G0032370	Zfp607b	zf-C2H2	zinc finger protein 607B [Source:MGI Symbol;Acc:MGI:2148237]
MGP_C57BL6NJ_G0018578	Ebf1	COE	early B cell factor 1 [Source:MGI Symbol;Acc:MGI:95275]
MGP_C57BL6NJ_G0032264	Zfp180	zf-C2H2	zinc finger protein 180 [Source:MGI Symbol;Acc:MGI:1923701]
MGP_C57BL6NJ_G0021726	Homez	Homeobox	homeodomain leucine zipper-encoding gene [Source:MGI Symbol;Acc:MGI:2678023]
MGP_C57BL6NJ_G0016352	Rfx8	RFX	regulatory factor X 8 [Source:MGI Symbol;Acc:MGI:3588206]
MGP_C57BL6NJ_G0021088	Zfp759	zf-C2H2	zinc finger protein 759 [Source:MGI Symbol;Acc:MGI:2446280]
MGP_C57BL6NJ_G0029885	Nsd2	HMG	nuclear receptor binding SET domain protein 2 [Source:MGI Symbol;Acc:MGI:1276574]
MGP_C57BL6NJ_G0023638	Zfp53	zf-C2H2	zinc finger protein 53 [Source:MGI Symbol;Acc:MGI:99200]
MGP_C57BL6NJ_G0020003	E2f6	E2F	E2F transcription factor 6 [Source:MGI Symbol;Acc:MGI:1354159]
MGP_C57BL6NJ_G0034893	Zfp317	zf-C2H2	zinc finger protein 317 [Source:MGI Symbol;Acc:MGI:107775]
MGP_C57BL6NJ_G0029490	Prdm2	zf-C2H2	PR domain containing 2, with ZNF domain [Source:MGI Symbol;Acc:MGI:107628]
MGP_C57BL6NJ_G0031127	Zfp746	zf-C2H2	zinc finger protein 746 [Source:MGI Symbol;Acc:MGI:1916478]
MGP_C57BL6NJ_G0024304	Zfp119a	zf-C2H2	zinc finger protein 119a [Source:MGI Symbol;Acc:MGI:1345189]
MGP_C57BL6NJ_G0021092	Zfp595	zf-C2H2	zinc finger protein 595 [Source:MGI Symbol;Acc:MGI:3040707]
MGP_C57BL6NJ_G0032094	Zfp329	zf-C2H2	zinc finger protein 329 [Source:MGI Symbol;Acc:MGI:1921283]
MGP_C57BL6NJ_G0035966	Zfp105	zf-C2H2	zinc finger protein 105 [Source:MGI Symbol;Acc:MGI:1277119]
MGP_C57BL6NJ_G0034972	Zfp809	zf-C2H2	zinc finger protein 809 [Source:MGI Symbol;Acc:MGI:2143362]
MGP_C57BL6NJ_G0032041	Zscan5b	zf-C2H2	zinc finger and SCAN domain containing 5B [Source:MGI Symbol;Acc:MGI:2159640]
MGP_C57BL6NJ_G0021107	Zfp729b	zf-C2H2	zinc finger protein 729b [Source:MGI Symbol;Acc:MGI:2145180]
MGP_C57BL6NJ_G0034911	Zfp846	zf-C2H2	zinc finger protein 846 [Source:MGI Symbol;Acc:MGI:1924012]
MGP_C57BL6NJ_G0032502	Usf2	bHLH	upstream transcription factor 2 [Source:MGI Symbol;Acc:MGI:99961]
MGP_C57BL6NJ_G0030701	Zfp68	zf-C2H2	zinc finger protein 68 [Source:MGI Symbol;Acc:MGI:1344427]
MGP_C57BL6NJ_G0021110	Zfp85	zf-C2H2	zinc finger protein 85 [Source:MGI Symbol;Acc:MGI:107767]
MGP_C57BL6NJ_G0028120	Phtf1	Others	putative homeodomain transcription factor 1 [Source:MGI Symbol;Acc:MGI:1332671]
MGP_C57BL6NJ_G0032439	Zfp420	zf-C2H2	zinc finger protein 420 [Source:MGI Symbol;Acc:MGI:2444666]
MGP_C57BL6NJ_G0030970	Nrf1	Nrf1	nuclear respiratory factor 1 [Source:MGI Symbol;Acc:MGI:1332235]
MGP_C57BL6NJ_G0017640	AW822073	Homeobox	expressed sequence AW822073 [Source:MGI Symbol;Acc:MGI:3034577]
MGP_C57BL6NJ_G0032095	Zfp110	zf-C2H2	zinc finger protein 110 [Source:MGI Symbol;Acc:MGI:1890378]
MGP_C57BL6NJ_G0016812	En1	Homeobox	engrailed 1 [Source:MGI Symbol;Acc:MGI:95389]
MGP_C57BL6NJ_G0020147	Nkx2-9	Homeobox	NK2 homeobox 9 [Source:MGI Symbol;Acc:MGI:1270158]
MGP_C57BL6NJ_G0036544	4932411N23Rik	MYB	RIKEN cDNA 4932411N23 gene [Source:MGI Symbol;Acc:MGI:3045322]
MGP_C57BL6NJ_G0033829	Zfp958	zf-C2H2	zinc finger protein 958 [Source:MGI Symbol;Acc:MGI:2385298]
MGP_C57BL6NJ_G0019464	Thra	THR-like	thyroid hormone receptor alpha [Source:MGI Symbol;Acc:MGI:98742]
MGP_C57BL6NJ_G0022851	Nfe2	TF_bZIP	nuclear factor, erythroid derived 2 [Source:MGI Symbol;Acc:MGI:97308]
MGP_C57BL6NJ_G0025015	Zfp516	zf-C2H2	zinc finger protein 516 [Source:MGI Symbol;Acc:MGI:2443957]
MGP_C57BL6NJ_G0021086	Zfp708	zf-C2H2	zinc finger protein 708 [Source:MGI Symbol;Acc:MGI:3040674]
MGP_C57BL6NJ_G0033717	Deaf1	SAND	DEAF1, transcription factor [Source:MGI Symbol;Acc:MGI:1858496]
MGP_C57BL6NJ_G0021098	Rsl1	zf-C2H2	regulator of sex limited protein 1 [Source:MGI Symbol;Acc:MGI:3044162]
MGP_C57BL6NJ_G0023659	Zfp945	zf-C2H2	zinc finger protein 945 [Source:MGI Symbol;Acc:MGI:2445132]
MGP_C57BL6NJ_G0035485	Foxb1	Fork_head	forkhead box B1 [Source:MGI Symbol;Acc:MGI:1927549]
MGP_C57BL6NJ_G0030085	Hopx	Homeobox	HOP homeobox [Source:MGI Symbol;Acc:MGI:1916782]
MGP_C57BL6NJ_G0029536	Zfp933	zf-C2H2	zinc finger protein 933 [Source:MGI Symbol;Acc:MGI:1922865]
MGP_C57BL6NJ_G0020256	Max	bHLH	Max protein [Source:MGI Symbol;Acc:MGI:96921]
MGP_C57BL6NJ_G0034909	Zfp426	zf-C2H2	zinc finger protein 426 [Source:MGI Symbol;Acc:MGI:1920248]
MGP_C57BL6NJ_G0018929	Trp53	P53	transformation related protein 53 [Source:MGI Symbol;Acc:MGI:98834]
MGP_C57BL6NJ_G0025890	Sohlh1	bHLH	spermatogenesis and oogenesis specific basic helix-loop-helix 1 [Source:MGI Symbol;Acc:MGI:2684956]
MGP_C57BL6NJ_G0031616	Zfp637	zf-C2H2	zinc finger protein 637 [Source:MGI Symbol;Acc:MGI:2448537]
MGP_C57BL6NJ_G0032724	Dbp	TF_bZIP	D site albumin promoter binding protein [Source:MGI Symbol;Acc:MGI:94866]
MGP_C57BL6NJ_G0021101	Zfp874b	zf-C2H2	zinc finger protein 874b [Source:MGI Symbol;Acc:MGI:3040702]
MGP_C57BL6NJ_G0027146	Zfp341	zf-C2H2	zinc finger protein 341 [Source:MGI Symbol;Acc:MGI:2682937]
MGP_C57BL6NJ_G0034162	Zfp930	zf-C2H2	zinc finger protein 930 [Source:MGI Symbol;Acc:MGI:2675306]
MGP_C57BL6NJ_G0032442	Zfp74	zf-C2H2	zinc finger protein 74 [Source:MGI Symbol;Acc:MGI:107784]
MGP_C57BL6NJ_G0027074	Scrt2	zf-C2H2	scratch family zinc finger 2 [Source:MGI Symbol;Acc:MGI:2139287]
MGP_C57BL6NJ_G0030586	Gtf2i	GTF2I	general transcription factor II I [Source:MGI Symbol;Acc:MGI:1202722]
MGP_C57BL6NJ_G0022826	Sp7	zf-C2H2	Sp7 transcription factor 7 [Source:MGI Symbol;Acc:MGI:2153568]
MGP_C57BL6NJ_G0017834	2610008E11Rik	zf-C2H2	RIKEN cDNA 2610008E11 gene [Source:MGI Symbol;Acc:MGI:1919378]
MGP_C57BL6NJ_G0033685	Zfp941	zf-C2H2	zinc finger protein 941 [Source:MGI Symbol;Acc:MGI:3039601]
MGP_C57BL6NJ_G0032096	Zfp128	zf-C2H2	zinc finger protein 128 [Source:MGI Symbol;Acc:MGI:2389445]
MGP_C57BL6NJ_G0034166	Zfp868	zf-C2H2	zinc finger protein 868 [Source:MGI Symbol;Acc:MGI:2142546]
MGP_C57BL6NJ_G0034910	Zfp266	zf-C2H2	zinc finger protein 266 [Source:MGI Symbol;Acc:MGI:1924769]
MGP_C57BL6NJ_G0032652	Nr1h2	THR-like	nuclear receptor subfamily 1, group H, member 2 [Source:MGI Symbol;Acc:MGI:1352463]
MGP_C57BL6NJ_G0019062	Zfp735	zf-C2H2	zinc finger protein 735 [Source:MGI Symbol;Acc:MGI:1923640]
MGP_C57BL6NJ_G0029401	Zbtb40	ZBTB	zinc finger and BTB domain containing 40 [Source:MGI Symbol;Acc:MGI:2682254]
MGP_C57BL6NJ_G0021129	Irx1	Homeobox	Iroquois homeobox 1 [Source:MGI Symbol;Acc:MGI:1197515]
MGP_C57BL6NJ_G0024540	Mkx	Homeobox	mohawk homeobox [Source:MGI Symbol;Acc:MGI:2687286]
MGP_C57BL6NJ_G0033348	Zfp143	zf-C2H2	zinc finger protein 143 [Source:MGI Symbol;Acc:MGI:1277969]
MGP_C57BL6NJ_G0026611	Rag1	Others	recombination activating gene 1 [Source:MGI Symbol;Acc:MGI:97848]
MGP_C57BL6NJ_G0017970	Zfp873	zf-C2H2	zinc finger protein 873 [Source:MGI Symbol;Acc:MGI:3040689]
MGP_C57BL6NJ_G0032017	Fiz1	zf-C2H2	Flt3 interacting zinc finger protein 1 [Source:MGI Symbol;Acc:MGI:1344336]
MGP_C57BL6NJ_G0022054	Sox21	HMG	SRY (sex determining region Y)-box 21 [Source:MGI Symbol;Acc:MGI:2654070]
MGP_C57BL6NJ_G0022078	Zic2	zf-C2H2	zinc finger protein of the cerebellum 2 [Source:MGI Symbol;Acc:MGI:106679]
MGP_C57BL6NJ_G0023644	Zfp229	zf-C2H2	zinc finger protein 229 [Source:MGI Symbol;Acc:MGI:2679295]
MGP_C57BL6NJ_G0029227	Zscan20	zf-C2H2	zinc finger and SCAN domains 20 [Source:MGI Symbol;Acc:MGI:2679268]
MGP_C57BL6NJ_G0030753	Rbak	zf-C2H2	RB-associated KRAB zinc finger [Source:MGI Symbol;Acc:MGI:1927369]
MGP_C57BL6NJ_G0020039	Myt1l	zf-C2HC	myelin transcription factor 1-like [Source:MGI Symbol;Acc:MGI:1100511]
MGP_C57BL6NJ_G0023665	Zfp13	zf-C2H2	zinc finger protein 13 [Source:MGI Symbol;Acc:MGI:99159]
MGP_C57BL6NJ_G0032440	Zfp27	zf-C2H2	zinc finger protein 27 [Source:MGI Symbol;Acc:MGI:99174]
MGP_C57BL6NJ_G0024306	Zfp119b	zf-C2H2	zinc finger protein 119b [Source:MGI Symbol;Acc:MGI:2385323]
MGP_C57BL6NJ_G0032061	Zfp954	zf-C2H2	zinc finger protein 954 [Source:MGI Symbol;Acc:MGI:1917764]
MGP_C57BL6NJ_G0023546	T	T-box	brachyury, T-box transcription factor T [Source:MGI Symbol;Acc:MGI:98472]
MGP_C57BL6NJ_G0022206	Zfp706	Others	zinc finger protein 706 [Source:MGI Symbol;Acc:MGI:1915286]
MGP_C57BL6NJ_G0031122	Zfp398	zf-C2H2	zinc finger protein 398 [Source:MGI Symbol;Acc:MGI:1917856]
MGP_C57BL6NJ_G0028875	Mysm1	MYB	myb-like, SWIRM and MPN domains 1 [Source:MGI Symbol;Acc:MGI:2444584]
MGP_C57BL6NJ_G0023484	Sim2	bHLH	single-minded family bHLH transcription factor 2 [Source:MGI Symbol;Acc:MGI:98307]
MGP_C57BL6NJ_G0023635	Zfp677	zf-C2H2	zinc finger protein 677 [Source:MGI Symbol;Acc:MGI:3053207]
MGP_C57BL6NJ_G0029855	Zfp512	zf-C2H2	zinc finger protein 512 [Source:MGI Symbol;Acc:MGI:1917345]
MGP_C57BL6NJ_G0034973	Zfp599	zf-C2H2	zinc finger protein 599 [Source:MGI Symbol;Acc:MGI:2679006]
MGP_C57BL6NJ_G0032047	Zfp28	zf-C2H2	zinc finger protein 28 [Source:MGI Symbol;Acc:MGI:99175]
MGP_C57BL6NJ_G0017972	Zfp938	zf-C2H2	zinc finger protein 938 [Source:MGI Symbol;Acc:MGI:3621440]
MGP_C57BL6NJ_G0016395	Stat4	STAT	signal transducer and activator of transcription 4 [Source:MGI Symbol;Acc:MGI:103062]
MGP_C57BL6NJ_G0033569	9130023H24Rik	zf-C2H2	RIKEN cDNA 9130023H24 gene [Source:MGI Symbol;Acc:MGI:2442738]
MGP_C57BL6NJ_G0032376	Zfp780b	zf-C2H2	zinc finger protein 780B [Source:MGI Symbol;Acc:MGI:2444764]
MGP_C57BL6NJ_G0021870	Sox7	HMG	SRY (sex determining region Y)-box 7 [Source:MGI Symbol;Acc:MGI:98369]
MGP_C57BL6NJ_G0034908	Zfp26	zf-C2H2	zinc finger protein 26 [Source:MGI Symbol;Acc:MGI:99173]
MGP_C57BL6NJ_G0024603	Zfp35	zf-C2H2	zinc finger protein 35 [Source:MGI Symbol;Acc:MGI:99179]
MGP_C57BL6NJ_G0023649	Zfp947	zf-C2H2	zinc finger protein 947 [Source:MGI Symbol;Acc:MGI:3646759]
MGP_C57BL6NJ_G0031019	D630045J12Rik	Others	RIKEN cDNA D630045J12 gene [Source:MGI Symbol;Acc:MGI:2669829]
MGP_C57BL6NJ_G0035965	Zkscan7	zf-C2H2	zinc finger with KRAB and SCAN domains 7 [Source:MGI Symbol;Acc:MGI:3040678]
MGP_C57BL6NJ_G0032062	Zfp773	zf-C2H2	zinc finger protein 773 [Source:MGI Symbol;Acc:MGI:1923623]
MGP_C57BL6NJ_G0031190	Jazf1	zf-C2H2	JAZF zinc finger 1 [Source:MGI Symbol;Acc:MGI:2141450]
MGP_C57BL6NJ_G0020030	Sox11	HMG	SRY (sex determining region Y)-box 11 [Source:MGI Symbol;Acc:MGI:98359]
MGP_C57BL6NJ_G0017249	Zbtb18	ZBTB	zinc finger and BTB domain containing 18 [Source:MGI Symbol;Acc:MGI:1353609]
MGP_C57BL6NJ_G0033954	Nkx6-3	Homeobox	NK6 homeobox 3 [Source:MGI Symbol;Acc:MGI:1921811]
MGP_C57BL6NJ_G0017604	Lin28b	CSD	lin-28 homolog B (C. elegans) [Source:MGI Symbol;Acc:MGI:3584032]
MGP_C57BL6NJ_G0024525	Crem	TF_bZIP	cAMP responsive element modulator [Source:MGI Symbol;Acc:MGI:88495]
MGP_C57BL6NJ_G0020668	Zkscan8	zf-C2H2	zinc finger with KRAB and SCAN domains 8 [Source:MGI Symbol;Acc:MGI:1913815]
MGP_C57BL6NJ_G0026123	Nr6a1	GCNF-like	nuclear receptor subfamily 6, group A, member 1 [Source:MGI Symbol;Acc:MGI:1352459]
MGP_C57BL6NJ_G0036152	Rhox8	Homeobox	reproductive homeobox 8 [Source:MGI Symbol;Acc:MGI:3579898]
MGP_C57BL6NJ_G0029141	Zfp69	zf-C2H2	zinc finger protein 69 [Source:MGI Symbol;Acc:MGI:107794]
MGP_C57BL6NJ_G0029533	Zfp600	zf-C2H2	zinc finger protein 600 [Source:MGI Symbol;Acc:MGI:3705222]
MGP_C57BL6NJ_G0028582	Arid3c	ARID	AT rich interactive domain 3C (BRIGHT-like) [Source:MGI Symbol;Acc:MGI:3650624]
MGP_C57BL6NJ_G0030836	Hmgb1	HMG	high mobility group box 1 [Source:MGI Symbol;Acc:MGI:96113]
MGP_C57BL6NJ_G0035257	Zbtb16	ZBTB	zinc finger and BTB domain containing 16 [Source:MGI Symbol;Acc:MGI:103222]
MGP_C57BL6NJ_G0032283	Zfp575	zf-C2H2	zinc finger protein 575 [Source:MGI Symbol;Acc:MGI:2141921]
MGP_C57BL6NJ_G0032130	Obox3	Homeobox	oocyte specific homeobox 3 [Source:MGI Symbol;Acc:MGI:2149032]
MGP_C57BL6NJ_G0017010	Zfp648	zf-C2H2	zinc finger protein 648 [Source:MGI Symbol;Acc:MGI:2685049]
MGP_C57BL6NJ_G0026112	Zbtb6	ZBTB	zinc finger and BTB domain containing 6 [Source:MGI Symbol;Acc:MGI:2442998]
MGP_C57BL6NJ_G0034974	Zfp810	zf-C2H2	zinc finger protein 810 [Source:MGI Symbol;Acc:MGI:2384563]
MGP_C57BL6NJ_G0032064	Zfp772	zf-C2H2	zinc finger protein 772 [Source:MGI Symbol;Acc:MGI:2385265]
MGP_C57BL6NJ_G0034263	Zfp617	zf-C2H2	zinc finger protein 617 [Source:MGI Symbol;Acc:MGI:2684459]
MGP_C57BL6NJ_G0016705	Hes6	bHLH	hairy and enhancer of split 6 [Source:MGI Symbol;Acc:MGI:1859852]
MGP_C57BL6NJ_G0028901	Foxd3	Fork_head	forkhead box D3 [Source:MGI Symbol;Acc:MGI:1347473]
MGP_C57BL6NJ_G0029939	Lyar	Others	Ly1 antibody reactive clone [Source:MGI Symbol;Acc:MGI:107470]
MGP_C57BL6NJ_G0023927	Zfp563	zf-C2H2	zinc finger protein 563 [Source:MGI Symbol;Acc:MGI:2677168]
MGP_C57BL6NJ_G0023925	Zfp763	zf-C2H2	zinc finger protein 763 [Source:MGI Symbol;Acc:MGI:1920701]
MGP_C57BL6NJ_G0029909	Hmx1	Homeobox	H6 homeobox 1 [Source:MGI Symbol;Acc:MGI:107178]
MGP_C57BL6NJ_G0029777	Gbx1	Homeobox	gastrulation brain homeobox 1 [Source:MGI Symbol;Acc:MGI:95667]
MGP_C57BL6NJ_G0036250	Zic3	zf-C2H2	zinc finger protein of the cerebellum 3 [Source:MGI Symbol;Acc:MGI:106676]
MGP_C57BL6NJ_G0023643	Zfp760	zf-C2H2	zinc finger protein 760 [Source:MGI Symbol;Acc:MGI:2679257]
MGP_C57BL6NJ_G0023642	Gm10226	zf-C2H2	predicted gene 10226 [Source:MGI Symbol;Acc:MGI:3704470]
MGP_C57BL6NJ_G0023640	Zfp948	zf-C2H2	zinc finger protein 948 [Source:MGI Symbol;Acc:MGI:3040683]
MGP_C57BL6NJ_G0023630	Zfp160	zf-C2H2	zinc finger protein 160 [Source:MGI Symbol;Acc:MGI:108187]
MGP_C57BL6NJ_G0036154	Rhox9	Homeobox	reproductive homeobox 9 [Source:MGI Symbol;Acc:MGI:1890128]
MGP_C57BL6NJ_G0027076	Tcf15	bHLH	transcription factor 15 [Source:MGI Symbol;Acc:MGI:104664]
MGP_C57BL6NJ_G0027047	Zfp120	zf-C2H2	zinc finger protein 120 [Source:MGI Symbol;Acc:MGI:1345179]
MGP_C57BL6NJ_G0027019	Insm1	zf-C2H2	insulinoma-associated 1 [Source:MGI Symbol;Acc:MGI:1859980]
MGP_C57BL6NJ_G0023249	Usf3	bHLH	upstream transcription factor family member 3 [Source:MGI Symbol;Acc:MGI:2685454]
MGP_C57BL6NJ_G0031391	Noto	Homeobox	notochord homeobox [Source:MGI Symbol;Acc:MGI:3053002]
MGP_C57BL6NJ_G0031353	Tlx2	Homeobox	T cell leukemia, homeobox 2 [Source:MGI Symbol;Acc:MGI:1350935]
MGP_C57BL6NJ_G0031129	Zfp467	zf-C2H2	zinc finger protein 467 [Source:MGI Symbol;Acc:MGI:1916160]
MGP_C57BL6NJ_G0028103	Csde1	CSD	cold shock domain containing E1, RNA binding [Source:MGI Symbol;Acc:MGI:92356]
MGP_C57BL6NJ_G0026253	Sp9	zf-C2H2	trans-acting transcription factor 9 [Source:MGI Symbol;Acc:MGI:3574660]
MGP_C57BL6NJ_G0032569	Zfp619	zf-C2H2	zinc finger protein 619 [Source:MGI Symbol;Acc:MGI:1917477]
MGP_C57BL6NJ_G0026051	Zbtb34	ZBTB	zinc finger and BTB domain containing 34 [Source:MGI Symbol;Acc:MGI:2685195]
MGP_C57BL6NJ_G0027473	Zbtb10	ZBTB	zinc finger and BTB domain containing 10 [Source:MGI Symbol;Acc:MGI:2139883]
MGP_C57BL6NJ_G0021173	Nr2f1	RXR-like	nuclear receptor subfamily 2, group F, member 1 [Source:MGI Symbol;Acc:MGI:1352451]
MGP_C57BL6NJ_G0021156	Zfp72	zf-C2H2	zinc finger protein 72 [Source:MGI Symbol;Acc:MGI:3033356]
MGP_C57BL6NJ_G0021100	Zfp874a	zf-C2H2	zinc finger protein 874a [Source:MGI Symbol;Acc:MGI:3040703]
MGP_C57BL6NJ_G0024848	Prdm6	zf-C2H2	PR domain containing 6 [Source:MGI Symbol;Acc:MGI:2684938]
MGP_C57BL6NJ_G0025715	Gm6020	zf-C2H2	predicted gene 6020 [Source:MGI Symbol;Acc:MGI:3643428]
MGP_C57BL6NJ_G0019075	Zfp616	zf-C2H2	zinc finger protein 616 [Source:MGI Symbol;Acc:MGI:3650906]
MGP_C57BL6NJ_G0032590	Zfp975	zf-C2H2	zinc finger protein 975 [Source:MGI Symbol;Acc:MGI:3648690]
MGP_C57BL6NJ_G0023521	Arid1b	ARID	AT rich interactive domain 1B (SWI-like) [Source:MGI Symbol;Acc:MGI:1926129]
MGP_C57BL6NJ_G0016623	Sp110	SAND	Sp110 nuclear body protein [Source:MGI Symbol;Acc:MGI:1923364]
MGP_C57BL6NJ_G0019300	Hsf5	HSF	heat shock transcription factor family member 5 [Source:MGI Symbol;Acc:MGI:2685585]
MGP_C57BL6NJ_G0030796	Zscan25	zf-C2H2	zinc finger and SCAN domain containing 25 [Source:MGI Symbol;Acc:MGI:3647079]
MGP_C57BL6NJ_G0027376	Ctcfl	zf-C2H2	CCCTC-binding factor (zinc finger protein)-like [Source:MGI Symbol;Acc:MGI:3652571]
MGP_C57BL6NJ_G0016891	Sox13	HMG	SRY (sex determining region Y)-box 13 [Source:MGI Symbol;Acc:MGI:98361]
MGP_C57BL6NJ_G0029363	Runx3	Runt	runt related transcription factor 3 [Source:MGI Symbol;Acc:MGI:102672]
MGP_C57BL6NJ_G0032375	Zfp974	zf-C2H2	zinc finger protein 974 [Source:MGI Symbol;Acc:MGI:1920680]
MGP_C57BL6NJ_G0028864	Zfp352	zf-C2H2	zinc finger protein 352 [Source:MGI Symbol;Acc:MGI:2387418]
MGP_C57BL6NJ_G0028675	Foxe1	Fork_head	forkhead box E1 [Source:MGI Symbol;Acc:MGI:1353500]
MGP_C57BL6NJ_G0034305	Zfp827	zf-C2H2	zinc finger protein 827 [Source:MGI Symbol;Acc:MGI:2444807]
MGP_C57BL6NJ_G0034215	Jund	TF_bZIP	jun D proto-oncogene [Source:MGI Symbol;Acc:MGI:96648]
MGP_C57BL6NJ_G0023664	Zfp213	zf-C2H2	zinc finger protein 213 [Source:MGI Symbol;Acc:MGI:3053094]
MGP_C57BL6NJ_G0023653	Zfp946	zf-C2H2	zinc finger protein 946 [Source:MGI Symbol;Acc:MGI:1921399]
MGP_C57BL6NJ_G0023646	Zfp942	zf-C2H2	zinc finger protein 942 [Source:MGI Symbol;Acc:MGI:1920483]
MGP_C57BL6NJ_G0021109	Zfp65	zf-C2H2	zinc finger protein 65 [Source:MGI Symbol;Acc:MGI:107769]
MGP_C57BL6NJ_G0021102	Zfp58	zf-C2H2	zinc finger protein 58 [Source:MGI Symbol;Acc:MGI:99205]
MGP_C57BL6NJ_G0031396	Egr4	zf-C2H2	early growth response 4 [Source:MGI Symbol;Acc:MGI:99252]
MGP_C57BL6NJ_G0021827	Setdb2	MBD	SET domain, bifurcated 2 [Source:MGI Symbol;Acc:MGI:2685139]
MGP_C57BL6NJ_G0031126	Zfp777	zf-C2H2	zinc finger protein 777 [Source:MGI Symbol;Acc:MGI:1919556]
MGP_C57BL6NJ_G0025240	Mta2	zf-GATA	metastasis-associated gene family, member 2 [Source:MGI Symbol;Acc:MGI:1346340]
MGP_C57BL6NJ_G0025225	Zbtb3	ZBTB	zinc finger and BTB domain containing 3 [Source:MGI Symbol;Acc:MGI:1922541]
MGP_C57BL6NJ_G0036684	Foxr2	Fork_head	forkhead box R2 [Source:MGI Symbol;Acc:MGI:3511682]
MGP_C57BL6NJ_G0022267	Zhx2	Homeobox	zinc fingers and homeoboxes 2 [Source:MGI Symbol;Acc:MGI:2683087]
MGP_C57BL6NJ_G0036159	Rhox12	Homeobox	reproductive homeobox 12 [Source:MGI Symbol;Acc:MGI:2685994]
MGP_C57BL6NJ_G0036163	Rhox7a	Homeobox	reproductive homeobox 7A [Source:MGI Symbol;Acc:MGI:3580246]
MGP_C57BL6NJ_G0036145	Rhox4b	Homeobox	reproductive homeobox 4B [Source:MGI Symbol;Acc:MGI:1930129]
MGP_C57BL6NJ_G0036143	Rhox1	Homeobox	reproductive homeobox 1 [Source:MGI Symbol;Acc:MGI:3580237]
MGP_C57BL6NJ_G0022023	Klf12	zf-C2H2	Kruppel-like factor 12 [Source:MGI Symbol;Acc:MGI:1333796]
MGP_C57BL6NJ_G0031625	Zfp9	zf-C2H2	zinc finger protein 9 [Source:MGI Symbol;Acc:MGI:99210]
MGP_C57BL6NJ_G0021464	Duxbl3	Homeobox	double homeobox B-like 3 [Source:MGI Symbol;Acc:MGI:3710520]
MGP_C57BL6NJ_G0021462	Duxbl2	Homeobox	double homeobox B-like 2 [Source:MGI Symbol;Acc:MGI:3710620]
MGP_C57BL6NJ_G0030303	4930522L14Rik	zf-C2H2	RIKEN cDNA 4930522L14 gene [Source:MGI Symbol;Acc:MGI:1925270]
MGP_C57BL6NJ_G0030248	Zfp951	zf-C2H2	zinc finger protein 951 [Source:MGI Symbol;Acc:MGI:2441896]
MGP_C57BL6NJ_G0030043	Nfxl1	zf-NF-X1	nuclear transcription factor, X-box binding-like 1 [Source:MGI Symbol;Acc:MGI:1923646]
MGP_C57BL6NJ_G0018767	Gm12258	zf-C2H2	predicted gene 12258 [Source:MGI Symbol;Acc:MGI:3651534]
MGP_C57BL6NJ_G0031264	Atoh1	bHLH	atonal bHLH transcription factor 1 [Source:MGI Symbol;Acc:MGI:104654]
MGP_C57BL6NJ_G0036413	Zxdb	zf-C2H2	zinc finger, X-linked, duplicated B [Source:MGI Symbol;Acc:MGI:3694898]
MGP_C57BL6NJ_G0036231	Zfp449	zf-C2H2	zinc finger protein 449 [Source:MGI Symbol;Acc:MGI:1925869]
MGP_C57BL6NJ_G0030984	Klf14	zf-C2H2	Kruppel-like factor 14 [Source:MGI Symbol;Acc:MGI:3577024]
MGP_C57BL6NJ_G0023938	Zfp414	zf-C2H2	zinc finger protein 414 [Source:MGI Symbol;Acc:MGI:1915641]
MGP_C57BL6NJ_G0017974	Gm4924	zf-C2H2	predicted gene 4924 [Source:MGI Symbol;Acc:MGI:3643133]
MGP_C57BL6NJ_G0029565	Cenps	Others	centromere protein S [Source:MGI Symbol;Acc:MGI:1917178]
MGP_C57BL6NJ_G0032577	Zfp788	zf-C2H2	zinc finger protein 788 [Source:MGI Symbol;Acc:MGI:1914857]
MGP_C57BL6NJ_G0032574	AW146154	zf-C2H2	expressed sequence AW146154 [Source:MGI Symbol;Acc:MGI:2142212]
MGP_C57BL6NJ_G0034392	Zfp791	zf-C2H2	zinc finger protein 791 [Source:MGI Symbol;Acc:MGI:3648473]
MGP_C57BL6NJ_G0032450	Zfp382	zf-C2H2	zinc finger protein 382 [Source:MGI Symbol;Acc:MGI:3588204]
MGP_C57BL6NJ_G0032444	Zfp568	zf-C2H2	zinc finger protein 568 [Source:MGI Symbol;Acc:MGI:2142347]
MGP_C57BL6NJ_G0032271	Zfp94	zf-C2H2	zinc finger protein 94 [Source:MGI Symbol;Acc:MGI:107610]
MGP_C57BL6NJ_G0032268	Zfp109	zf-C2H2	zinc finger protein 109 [Source:MGI Symbol;Acc:MGI:1929099]
MGP_C57BL6NJ_G0032137	Crxos	Homeobox	cone-rod homeobox, opposite strand [Source:MGI Symbol;Acc:MGI:2451355]
MGP_C57BL6NJ_G0032134	Obox5	Homeobox	oocyte specific homeobox 5 [Source:MGI Symbol;Acc:MGI:2149035]
MGP_C57BL6NJ_G0032019	Zfp865	zf-C2H2	zinc finger protein 865 [Source:MGI Symbol;Acc:MGI:2442656]
MGP_C57BL6NJ_G0032011	Zfp628	zf-C2H2	zinc finger protein 628 [Source:MGI Symbol;Acc:MGI:2665174]
MGP_C57BL6NJ_G0034971	Zfp872	zf-C2H2	zinc finger protein 872 [Source:MGI Symbol;Acc:MGI:3588272]
MGP_C57BL6NJ_G0034870	Zfp558	zf-C2H2	zinc finger protein 558 [Source:MGI Symbol;Acc:MGI:1921681]
MGP_C57BL6NJ_G0034867	Ubtfl1	HMG	upstream binding transcription factor, RNA polymerase I-like 1 [Source:MGI Symbol;Acc:MGI:3588290]
MGP_C57BL6NJ_G0027242	Tox2	HMG	TOX high mobility group box family member 2 [Source:MGI Symbol;Acc:MGI:3611233]
MGP_C57BL6NJ_G0027227	Mafb	TF_bZIP	v-maf musculoaponeurotic fibrosarcoma oncogene family, protein B (avian) [Source:MGI Symbol;Acc:MGI:104555]
MGP_C57BL6NJ_G0027568	Sox2	HMG	SRY (sex determining region Y)-box 2 [Source:MGI Symbol;Acc:MGI:98364]
MGP_C57BL6NJ_G0027105	Foxs1	Fork_head	forkhead box S1 [Source:MGI Symbol;Acc:MGI:95546]
MGP_C57BL6NJ_G0025714	Zfp950	zf-C2H2	zinc finger protein 950 [Source:MGI Symbol;Acc:MGI:2652824]
MGP_C57BL6NJ_G0027048	Gm21994	zf-C2H2	predicted gene 21994 [Source:MGI Symbol;Acc:MGI:5439751]
MGP_C57BL6NJ_G0021087	Rslcan18	zf-C2H2	regulator of sex-limitation candidate 18 [Source:MGI Symbol;Acc:MGI:5433745]
MGP_C57BL6NJ_G0035991	2010315B03Rik	zf-C2H2	RIKEN cDNA 2010315B03 gene [Source:MGI Symbol;Acc:MGI:1919321]
MGP_C57BL6NJ_G0027049	Gm10770	zf-C2H2	predicted gene 10770 [Source:MGI Symbol;Acc:MGI:3642046]
MGP_C57BL6NJ_G0017962	BC025920	zf-C2H2	cDNA sequence BC025920 [Source:MGI Symbol;Acc:MGI:2670983]
MGP_C57BL6NJ_G0026574	Zfp408	zf-C2H2	zinc finger protein 408 [Source:MGI Symbol;Acc:MGI:2685857]
MGP_C57BL6NJ_G0017639	Gm4981	Homeobox	predicted gene 4981 [Source:MGI Symbol;Acc:MGI:3645498]
MGP_C57BL6NJ_G0026230	Sp5	zf-C2H2	trans-acting transcription factor 5 [Source:MGI Symbol;Acc:MGI:1927715]
MGP_C57BL6NJ_G0017376	Zbtb2	ZBTB	zinc finger and BTB domain containing 2 [Source:MGI Symbol;Acc:MGI:2685949]
MGP_C57BL6NJ_G0022847	Hoxc4	Homeobox	homeobox C4 [Source:MGI Symbol;Acc:MGI:96195]
MGP_C57BL6NJ_G0019401	Hoxb2	Homeobox	homeobox B2 [Source:MGI Symbol;Acc:MGI:96183]
MGP_C57BL6NJ_G0019380	Zfp652	zf-C2H2	zinc finger protein 652 [Source:MGI Symbol;Acc:MGI:2442221]
MGP_C57BL6NJ_G0020795	Sox4	HMG	SRY (sex determining region Y)-box 4 [Source:MGI Symbol;Acc:MGI:98366]
MGP_C57BL6NJ_G0019918	Hmga1b	HMGA	high mobility group AT-hook 1B [Source:MGI Symbol;Acc:MGI:96161]
MGP_C57BL6NJ_G0021252	Foxd1	Fork_head	forkhead box D1 [Source:MGI Symbol;Acc:MGI:1347463]
MGP_C57BL6NJ_G0017971	AU041133	zf-C2H2	expressed sequence AU041133 [Source:MGI Symbol;Acc:MGI:2143755]
MGP_C57BL6NJ_G0029535	Zfp984	zf-C2H2	zinc finger protein 984 [Source:MGI Symbol;Acc:MGI:3651978]
MGP_C57BL6NJ_G0029534	Zfp978	zf-C2H2	zinc finger protein 978 [Source:MGI Symbol;Acc:MGI:3701123]
MGP_C57BL6NJ_G0033528	E430018J23Rik	zf-C2H2	RIKEN cDNA E430018J23 gene [Source:MGI Symbol;Acc:MGI:2141981]
MGP_C57BL6NJ_G0032448	Zfp566	zf-C2H2	zinc finger protein 566 [Source:MGI Symbol;Acc:MGI:1919806]
MGP_C57BL6NJ_G0032373	Zfp59	zf-C2H2	zinc finger protein 59 [Source:MGI Symbol;Acc:MGI:99206]
MGP_C57BL6NJ_G0032142	Zfp541	zf-C2H2	zinc finger protein 541 [Source:MGI Symbol;Acc:MGI:3647699]
MGP_C57BL6NJ_G0021097	Zfp429	zf-C2H2	zinc finger protein 429 [Source:MGI Symbol;Acc:MGI:1920057]
MGP_C57BL6NJ_G0021096	Zfp456	zf-C2H2	zinc finger protein 456 [Source:MGI Symbol;Acc:MGI:3040694]
MGP_C57BL6NJ_G0034189	Mef2b	SRF	myocyte enhancer factor 2B [Source:MGI Symbol;Acc:MGI:104526]
MGP_C57BL6NJ_G0034163	D130040H23Rik	zf-C2H2	RIKEN cDNA D130040H23 gene [Source:MGI Symbol;Acc:MGI:2444324]
MGP_C57BL6NJ_G0030535	Zfp664	zf-C2H2	zinc finger protein 664 [Source:MGI Symbol;Acc:MGI:2442505]
MGP_C57BL6NJ_G0026270	Hoxd3	Homeobox	homeobox D3 [Source:MGI Symbol;Acc:MGI:96207]
MGP_C57BL6NJ_G0026006	Prdm12	zf-C2H2	PR domain containing 12 [Source:MGI Symbol;Acc:MGI:2685844]
MGP_C57BL6NJ_G0036406	Zfx	zf-C2H2	zinc finger protein X-linked [Source:MGI Symbol;Acc:MGI:99211]
MGP_C57BL6NJ_G0031177	Hoxa3	Homeobox	homeobox A3 [Source:MGI Symbol;Acc:MGI:96175]
MGP_C57BL6NJ_G0036148	Rhox2h	Homeobox	reproductive homeobox 2H [Source:MGI Symbol;Acc:MGI:3713490]
MGP_C57BL6NJ_G0036144	Rhox2c	Homeobox	reproductive homeobox 2C [Source:MGI Symbol;Acc:MGI:3770266]
MGP_C57BL6NJ_G0036146	Rhox2b	Homeobox	reproductive homeobox 2B [Source:MGI Symbol;Acc:MGI:3770262]
MGP_C57BL6NJ_G0034928	Zglp1	zf-GATA	zinc finger, GATA-like protein 1 [Source:MGI Symbol;Acc:MGI:3696042]
MGP_C57BL6NJ_G0018004	Ascl4	bHLH	achaete-scute family bHLH transcription factor 4 [Source:MGI Symbol;Acc:MGI:1914591]
MGP_C57BL6NJ_G0032206	Gm4969	HMG	predicted gene 4969 [Source:MGI Symbol;Acc:MGI:3647482]
MGP_C57BL6NJ_G0032267	Zfp111	zf-C2H2	zinc finger protein 111 [Source:MGI Symbol;Acc:MGI:1929114]
MGP_C57BL6NJ_G0034262	Zfp882	zf-C2H2	zinc finger protein 882 [Source:MGI Symbol;Acc:MGI:3642748]
MGP_C57BL6NJ_G0023515	Gm15446	zf-C2H2	predicted gene 15446 [Source:MGI Symbol;Acc:MGI:3709333]
MGP_C57BL6NJ_G0029173	Pou3f1	Pou	POU domain, class 3, transcription factor 1 [Source:MGI Symbol;Acc:MGI:101896]
MGP_C57BL6NJ_G0021084	Zfp712	zf-C2H2	zinc finger protein 712 [Source:MGI Symbol;Acc:MGI:1925501]
MGP_C57BL6NJ_G0021113	Zfp493	zf-C2H2	zinc finger protein 493 [Source:MGI Symbol;Acc:MGI:1920208]
MGP_C57BL6NJ_G0032575	Gm6871	zf-C2H2	predicted gene 6871 [Source:MGI Symbol;Acc:MGI:3643456]
MGP_C57BL6NJ_G0030305	Gm17655	zf-C2H2	predicted gene, 17655 [Source:MGI Symbol;Acc:MGI:4937289]
MGP_C57BL6NJ_G0021051	Gm5141	zf-C2H2	predicted gene 5141 [Source:MGI Symbol;Acc:MGI:3779466]
MGP_C57BL6NJ_G0032576	2610021A01Rik	zf-C2H2	RIKEN cDNA 2610021A01 gene [Source:MGI Symbol;Acc:MGI:1922662]
MGP_C57BL6NJ_G0036704	Yy2	zf-C2H2	Yy2 transcription factor [Source:MGI Symbol;Acc:MGI:3837947]
MGP_C57BL6NJ_G0034167	Zfp964	zf-C2H2	zinc finger protein 964 [Source:MGI Symbol;Acc:MGI:3646490]
MGP_C57BL6NJ_G0022055	Gm9376	Homeobox	predicted gene 9376 [Source:MGI Symbol;Acc:MGI:3643023]
MGP_C57BL6NJ_G0032588	Gm2381	zf-C2H2	predicted gene 2381 [Source:MGI Symbol;Acc:MGI:3780549]
MGP_C57BL6NJ_G0034169	Zfp963	zf-C2H2	zinc finger protein 963 [Source:MGI Symbol;Acc:MGI:4867078]
MGP_C57BL6NJ_G0032585	Zfp977	zf-C2H2	zinc finger protein 977 [Source:MGI Symbol;Acc:MGI:3645327]
MGP_C57BL6NJ_G0032583	Zfp141	zf-C2H2	zinc finger protein 141 [Source:MGI Symbol;Acc:MGI:3584269]
MGP_C57BL6NJ_G0034170	Gm20422	zf-C2H2	predicted gene 20422 [Source:MGI Symbol;Acc:MGI:5141887]
MGP_C57BL6NJ_G0021172	Pou5f2	Pou	POU domain class 5, transcription factor 2 [Source:MGI Symbol;Acc:MGI:1922757]
MGP_C57BL6NJ_G0030758	Zfp853	zf-C2H2	zinc finger protein 853 [Source:MGI Symbol;Acc:MGI:2685638]
MGP_C57BL6NJ_G0017966	Gm4767	zf-C2H2	predicted gene 4767 [Source:MGI Symbol;Acc:MGI:3644409]
MGP_C57BL6NJ_G0016894	Gm38394	zf-BED	predicted gene, 38394 [Source:MGI Symbol;Acc:MGI:5614057]
MGP_C57BL6NJ_G0016788	Gm19965	zf-C2H2	predicted gene, 19965 [Source:MGI Symbol;Acc:MGI:5012150]
MGP_C57BL6NJ_G0023931	Zfp955a	zf-C2H2	zinc finger protein 955A [Source:MGI Symbol;Acc:MGI:4834570]
MGP_C57BL6NJ_G0018417	Purb	Others	purine rich element binding protein B [Source:MGI Symbol;Acc:MGI:1338779]
MGP_C57BL6NJ_G0030704	Gm5294	Fork_head	predicted gene 5294 [Source:MGI Symbol;Acc:MGI:3646467]
MGP_C57BL6NJ_G0017969	Gm3055	zf-C2H2	predicted gene 3055 [Source:MGI Symbol;Acc:MGI:3809197]
MGP_C57BL6NJ_G0021461	Cphx3	Homeobox	cytoplasmic polyadenylated homeobox 3 [Source:MGI Symbol;Acc:MGI:3711264]
MGP_C57BL6NJ_G0021364	Zfp131	ZBTB	zinc finger protein 131 [Source:MGI Symbol;Acc:MGI:1919715]
MGP_C57BL6NJ_G0021049	Gm3604	zf-C2H2	predicted gene 3604 [Source:MGI Symbol;Acc:MGI:3781781]
MGP_C57BL6NJ_G0028509	Pou3f2	Pou	POU domain, class 3, transcription factor 2 [Source:MGI Symbol;Acc:MGI:101895]
MGP_C57BL6NJ_G0023919	Zfp799	zf-C2H2	zinc finger protein 799 [Source:MGI Symbol;Acc:MGI:2443934]
MGP_C57BL6NJ_G0023920	Zfp870	zf-C2H2	zinc finger protein 870 [Source:MGI Symbol;Acc:MGI:3029586]
MGP_C57BL6NJ_G0021105	Zfp748	zf-C2H2	zinc finger protein 748 [Source:MGI Symbol;Acc:MGI:1916455]
MGP_C57BL6NJ_G0036149	Rhox2d	Homeobox	reproductive homeobox 2D [Source:MGI Symbol;Acc:MGI:3648779]
MGP_C57BL6NJ_G0036147	Rhox2f	Homeobox	reproductive homeobox 2F [Source:MGI Symbol;Acc:MGI:3770275]
MGP_C57BL6NJ_G0021459	Cphx1	Homeobox	cytoplasmic polyadenylated homeobox 1 [Source:MGI Symbol;Acc:MGI:2145733]
MGP_C57BL6NJ_G0019946	Gm21060	zf-C2H2	predicted gene, 21060 [Source:MGI Symbol;Acc:MGI:5434415]
MGP_C57BL6NJ_G0033855	Sox1	HMG	SRY (sex determining region Y)-box 1 [Source:MGI Symbol;Acc:MGI:98357]
MGP_C57BL6NJ_G0028416	Lhx8	Homeobox	LIM homeobox protein 8 [Source:MGI Symbol;Acc:MGI:1096343]
MGP_C57BL6NJ_G0023650	Zfp994	zf-C2H2	zinc finger protein 994 [Source:MGI Symbol;Acc:MGI:3643318]
MGP_C57BL6NJ_G0035994	Gm21836	zf-C2H2	predicted gene, 21836 [Source:MGI Symbol;Acc:MGI:5434000]
MGP_C57BL6NJ_G0017967	Zfp433	zf-C2H2	zinc finger protein 433 [Source:MGI Symbol;Acc:MGI:1920860]
MGP_C57BL6NJ_G0017965	Gm10778	zf-C2H2	predicted gene 10778 [Source:MGI Symbol;Acc:MGI:3809656]
MGP_C57BL6NJ_G0032377	Zfp850	zf-C2H2	zinc finger protein 850 [Source:MGI Symbol;Acc:MGI:3036281]
MGP_C57BL6NJ_G0034704	Foxl1	Fork_head	forkhead box L1 [Source:MGI Symbol;Acc:MGI:1347469]
MGP_C57BL6NJ_G0021104	Zfp87	zf-C2H2	zinc finger protein 87 [Source:MGI Symbol;Acc:MGI:107768]
MGP_C57BL6NJ_G0016938	Ascl5	bHLH	achaete-scute family bHLH transcription factor 5 [Source:MGI Symbol;Acc:MGI:2685043]
MGP_C57BL6NJ_G0032446	Zfp82	zf-C2H2	zinc finger protein 82 [Source:MGI Symbol;Acc:MGI:1890753]
MGP_C57BL6NJ_G0021460	Cphx2	Homeobox	cytoplasmic polyadenylated homeobox 2 [Source:MGI Symbol;Acc:MGI:3780272]
MGP_C57BL6NJ_G0021094	Zfp953	zf-C2H2	zinc finger protein 953 [Source:MGI Symbol;Acc:MGI:3612873]
MGP_C57BL6NJ_G0016222	Tcf24	bHLH	transcription factor 24 [Source:MGI Symbol;Acc:MGI:3780500]
MGP_C57BL6NJ_G0022836	Atf7	TF_bZIP	activating transcription factor 7 [Source:MGI Symbol;Acc:MGI:2443472]
MGP_C57BL6NJ_G0032125	Obox8	Homeobox	oocyte specific homeobox 8 [Source:MGI Symbol;Acc:MGI:3645855]
MGP_C57BL6NJ_G0032441	Zfp383	zf-C2H2	zinc finger protein 383 [Source:MGI Symbol;Acc:MGI:1920979]
MGP_C57BL6NJ_G0036540	Tgif2lx2	Homeobox	TGFB-induced factor homeobox 2-like, X-linked 2 [Source:MGI Symbol;Acc:MGI:3800824]
MGP_C57BL6NJ_G0021085	Gm28557	zf-C2H2	predicted gene 28557 [Source:MGI Symbol;Acc:MGI:5579263]
MGP_C57BL6NJ_G0016790	Gm28363	zf-C2H2	predicted gene 28363 [Source:MGI Symbol;Acc:MGI:5579069]
MGP_C57BL6NJ_G0032457	Ovol3	zf-C2H2	ovo like zinc finger 3 [Source:MGI Symbol;Acc:MGI:2388075]
MGP_C57BL6NJ_G0026271	Hoxd4	Homeobox	homeobox D4 [Source:MGI Symbol;Acc:MGI:96208]
MGP_C57BL6NJ_G0016789	B020011L13Rik	zf-C2H2	RIKEN cDNA B020011L13 gene [Source:MGI Symbol;Acc:MGI:3588191]
MGP_C57BL6NJ_G0016791	Gm28168	zf-C2H2	predicted gene 28168 [Source:MGI Symbol;Acc:MGI:5578874]
MGP_C57BL6NJ_G0016792	Gm29106	zf-C2H2	predicted gene 29106 [Source:MGI Symbol;Acc:MGI:5579812]
MGP_C57BL6NJ_G0016895	Zbed6	zf-BED	zinc finger, BED type containing 6 [Source:MGI Symbol;Acc:MGI:3828086]
MGP_C57BL6NJ_G0022913	Gm5767	zf-LITAF-like	predicted gene 5767 [Source:MGI Symbol;Acc:MGI:3643507]
MGP_C57BL6NJ_G0029076	Gm12845	zf-C2H2	predicted gene 12845 [Source:MGI Symbol;Acc:MGI:3651666]
