# Supplementary material for: LncRNA-mRNA Expression Profiles of Osteoclast After Conditional Knockout HIF-1α
Source: Front Genet. 2022 Jun 21;13:909095. doi: 10.3389/fgene.2022.909095 (PMC9253292; doi:10.3389/fgene.2022.909095)
Supplement: Supplementary file 5 [file Table6.XLSX]

## Sheet: Sheet1
PathwayID	Pathway	Level1	Level2	list_number	total_number	Pvalue	FDR	Gene	URL
mmu04666	Fc gamma R-mediated phagocytosis	Organismal Systems	Immune system	3	67	0.00108575	0.107489	MGP_C57BL6NJ_G0033450(Prkcb),MGP_C57BL6NJ_G0022301(Asap1),MGP_C57BL6NJ_G0033002(Gab2)	http://www.kegg.jp/kegg-bin/show_pathway?map04666/K12488%09%23FFFFFF,red/K19662%09%23FFFFFF,red/K08091%09%23FFFFFF,red/
mmu04071	Sphingolipid signaling pathway	Environmental Information Processing	Signal transduction	3	100	0.00342108	0.169344	MGP_C57BL6NJ_G0033450(Prkcb),MGP_C57BL6NJ_G0021906(Ppp2r2a),MGP_C57BL6NJ_G0033002(Gab2)	http://www.kegg.jp/kegg-bin/show_pathway?map04071/K04354%09%23FFFFFF,red/K19662%09%23FFFFFF,red/K08091%09%23FFFFFF,red/
mmu04727	GABAergic synapse	Organismal Systems	Nervous system	2	77	0.0228349	0.413805	MGP_C57BL6NJ_G0020259(Gphn),MGP_C57BL6NJ_G0033450(Prkcb)	http://www.kegg.jp/kegg-bin/show_pathway?map04727/K15376%09%23FFFFFF,red/K19662%09%23FFFFFF,red/
mmu05032	Morphine addiction	Human Diseases	Substance dependence	2	80	0.0245214	0.413805	MGP_C57BL6NJ_G0033450(Prkcb),MGP_C57BL6NJ_G0017454(Pde7b)	http://www.kegg.jp/kegg-bin/show_pathway?map05032/K19662%09%23FFFFFF,red/K18436%09%23FFFFFF,red/
mmu04750	Inflammatory mediator regulation of TRP channels	Organismal Systems	Sensory system	2	104	0.0397204	0.413805	MGP_C57BL6NJ_G0033450(Prkcb),MGP_C57BL6NJ_G0021587(Ptger2)	http://www.kegg.jp/kegg-bin/show_pathway?map04750/K19662%09%23FFFFFF,red/K04259%09%23FFFFFF,red/
mmu04728	Dopaminergic synapse	Organismal Systems	Nervous system	2	116	0.0483605	0.413805	MGP_C57BL6NJ_G0033450(Prkcb),MGP_C57BL6NJ_G0021906(Ppp2r2a)	http://www.kegg.jp/kegg-bin/show_pathway?map04728/K04354%09%23FFFFFF,red/K19662%09%23FFFFFF,red/
mmu05206	MicroRNAs in cancer	Human Diseases	Cancers: Overview	2	119	0.0506193	0.413805	MGP_C57BL6NJ_G0033450(Prkcb),MGP_C57BL6NJ_G0026135(Zeb2)	http://www.kegg.jp/kegg-bin/show_pathway?map05206/K09299%09%23FFFFFF,red/K19662%09%23FFFFFF,red/
mmu00230	Purine metabolism	Metabolism	Nucleotide metabolism	2	119	0.0506193	0.413805	MGP_C57BL6NJ_G0021924(Gm21685),MGP_C57BL6NJ_G0017454(Pde7b)	http://www.kegg.jp/kegg-bin/show_pathway?map00230/K12305%09%23FFFFFF,red/K18436%09%23FFFFFF,red/
mmu00900	Terpenoid backbone biosynthesis	Metabolism	Metabolism of terpenoids and polyketides	1	19	0.0562833	0.413805	MGP_C57BL6NJ_G0025810(Pdss1)	http://www.kegg.jp/kegg-bin/show_pathway?map00900/K12504%09%23FFFFFF,red/
mmu00515	Mannose type O-glycan biosynthesis	Metabolism	Glycan biosynthesis and metabolism	1	20	0.0591586	0.413805	MGP_C57BL6NJ_G0034287(Large)	http://www.kegg.jp/kegg-bin/show_pathway?map00515/K09668%09%23FFFFFF,red/
mmu00790	Folate biosynthesis	Metabolism	Metabolism of cofactors and vitamins	1	22	0.0648836	0.413805	MGP_C57BL6NJ_G0020259(Gphn)	http://www.kegg.jp/kegg-bin/show_pathway?map00790/K15376%09%23FFFFFF,red/
mmu05143	African trypanosomiasis	Human Diseases	Infectious diseases: Parasitic	1	27	0.0790483	0.413805	MGP_C57BL6NJ_G0033450(Prkcb)	http://www.kegg.jp/kegg-bin/show_pathway?map05143/K19662%09%23FFFFFF,red/
mmu04960	Aldosterone-regulated sodium reabsorption	Organismal Systems	Excretory system	1	30	0.0874467	0.413805	MGP_C57BL6NJ_G0033450(Prkcb)	http://www.kegg.jp/kegg-bin/show_pathway?map04960/K19662%09%23FFFFFF,red/
mmu04024	cAMP signaling pathway	Environmental Information Processing	Signal transduction	2	175	0.0988663	0.413805	MGP_C57BL6NJ_G0020565(Vipr2),MGP_C57BL6NJ_G0021587(Ptger2)	http://www.kegg.jp/kegg-bin/show_pathway?map04024/K04590%09%23FFFFFF,red/K04259%09%23FFFFFF,red/
mmu04973	Carbohydrate digestion and absorption	Organismal Systems	Digestive system	1	35	0.101279	0.413805	MGP_C57BL6NJ_G0033450(Prkcb)	http://www.kegg.jp/kegg-bin/show_pathway?map04973/K19662%09%23FFFFFF,red/
mmu04340	Hedgehog signaling pathway	Environmental Information Processing	Signal transduction	1	39	0.112197	0.413805	MGP_C57BL6NJ_G0024850(Csnk1g3)	http://www.kegg.jp/kegg-bin/show_pathway?map04340/K08958%09%23FFFFFF,red/
mmu02010	ABC transporters	Environmental Information Processing	Membrane transport	1	40	0.114907	0.413805	MGP_C57BL6NJ_G0036487(Abcb7)	http://www.kegg.jp/kegg-bin/show_pathway?map02010/K05662%09%23FFFFFF,red/
mmu04014	Ras signaling pathway	Environmental Information Processing	Signal transduction	2	194	0.117362	0.413805	MGP_C57BL6NJ_G0033450(Prkcb),MGP_C57BL6NJ_G0033002(Gab2)	http://www.kegg.jp/kegg-bin/show_pathway?map04014/K19662%09%23FFFFFF,red/K08091%09%23FFFFFF,red/
mmu04961	Endocrine and other factor-regulated calcium reabsorption	Organismal Systems	Excretory system	1	41	0.117608	0.413805	MGP_C57BL6NJ_G0033450(Prkcb)	http://www.kegg.jp/kegg-bin/show_pathway?map04961/K19662%09%23FFFFFF,red/
mmu00510	N-Glycan biosynthesis	Metabolism	Glycan biosynthesis and metabolism	1	44	0.125664	0.413805	MGP_C57BL6NJ_G0028083(Man1a2)	http://www.kegg.jp/kegg-bin/show_pathway?map00510/K01230%09%23FFFFFF,red/
mmu04144	Endocytosis	Cellular Processes	Transport and catabolism	2	204	0.12743	0.413805	MGP_C57BL6NJ_G0022301(Asap1),MGP_C57BL6NJ_G0024426(Ehd3)	http://www.kegg.jp/kegg-bin/show_pathway?map04144/K12488%09%23FFFFFF,red/K12476%09%23FFFFFF,red/
mmu00240	Pyrimidine metabolism	Metabolism	Nucleotide metabolism	1	50	0.141562	0.413805	MGP_C57BL6NJ_G0021924(Gm21685)	http://www.kegg.jp/kegg-bin/show_pathway?map00240/K12305%09%23FFFFFF,red/
mmu04730	Long-term depression	Organismal Systems	Nervous system	1	52	0.146798	0.413805	MGP_C57BL6NJ_G0033450(Prkcb)	http://www.kegg.jp/kegg-bin/show_pathway?map04730/K19662%09%23FFFFFF,red/
mmu04370	VEGF signaling pathway	Environmental Information Processing	Signal transduction	1	54	0.152004	0.413805	MGP_C57BL6NJ_G0033450(Prkcb)	http://www.kegg.jp/kegg-bin/show_pathway?map04370/K19662%09%23FFFFFF,red/
mmu05223	Non-small cell lung cancer	Human Diseases	Cancers: Specific types	1	54	0.152004	0.413805	MGP_C57BL6NJ_G0033450(Prkcb)	http://www.kegg.jp/kegg-bin/show_pathway?map05223/K19662%09%23FFFFFF,red/
mmu04664	Fc epsilon RI signaling pathway	Organismal Systems	Immune system	1	57	0.159754	0.413805	MGP_C57BL6NJ_G0033002(Gab2)	http://www.kegg.jp/kegg-bin/show_pathway?map04664/K08091%09%23FFFFFF,red/
mmu04720	Long-term potentiation	Organismal Systems	Nervous system	1	58	0.162322	0.413805	MGP_C57BL6NJ_G0033450(Prkcb)	http://www.kegg.jp/kegg-bin/show_pathway?map04720/K19662%09%23FFFFFF,red/
mmu05031	Amphetamine addiction	Human Diseases	Substance dependence	1	60	0.167435	0.413805	MGP_C57BL6NJ_G0033450(Prkcb)	http://www.kegg.jp/kegg-bin/show_pathway?map05031/K19662%09%23FFFFFF,red/
mmu04924	Renin secretion	Organismal Systems	Endocrine system	1	61	0.169981	0.413805	MGP_C57BL6NJ_G0021587(Ptger2)	http://www.kegg.jp/kegg-bin/show_pathway?map04924/K04259%09%23FFFFFF,red/
mmu04918	Thyroid hormone synthesis	Organismal Systems	Endocrine system	1	63	0.175048	0.413805	MGP_C57BL6NJ_G0033450(Prkcb)	http://www.kegg.jp/kegg-bin/show_pathway?map04918/K19662%09%23FFFFFF,red/
mmu04971	Gastric acid secretion	Organismal Systems	Digestive system	1	63	0.175048	0.413805	MGP_C57BL6NJ_G0033450(Prkcb)	http://www.kegg.jp/kegg-bin/show_pathway?map04971/K19662%09%23FFFFFF,red/
mmu05140	Leishmaniasis	Human Diseases	Infectious diseases: Parasitic	1	63	0.175048	0.413805	MGP_C57BL6NJ_G0033450(Prkcb)	http://www.kegg.jp/kegg-bin/show_pathway?map05140/K19662%09%23FFFFFF,red/
mmu05220	Chronic myeloid leukemia	Human Diseases	Cancers: Specific types	1	63	0.175048	0.413805	MGP_C57BL6NJ_G0033002(Gab2)	http://www.kegg.jp/kegg-bin/show_pathway?map05220/K08091%09%23FFFFFF,red/
mmu05214	Glioma	Human Diseases	Cancers: Specific types	1	64	0.177571	0.413805	MGP_C57BL6NJ_G0033450(Prkcb)	http://www.kegg.jp/kegg-bin/show_pathway?map05214/K19662%09%23FFFFFF,red/
mmu04662	B cell receptor signaling pathway	Organismal Systems	Immune system	1	64	0.177571	0.413805	MGP_C57BL6NJ_G0033450(Prkcb)	http://www.kegg.jp/kegg-bin/show_pathway?map04662/K19662%09%23FFFFFF,red/
mmu04970	Salivary secretion	Organismal Systems	Digestive system	1	64	0.177571	0.413805	MGP_C57BL6NJ_G0033450(Prkcb)	http://www.kegg.jp/kegg-bin/show_pathway?map04970/K19662%09%23FFFFFF,red/
mmu01521	EGFR tyrosine kinase inhibitor resistance	Human Diseases	Drug resistance: Antineoplastic	1	66	0.182594	0.413805	MGP_C57BL6NJ_G0033450(Prkcb)	http://www.kegg.jp/kegg-bin/show_pathway?map01521/K19662%09%23FFFFFF,red/
mmu04540	Gap junction	Cellular Processes	Cellular community - eukaryotes	1	71	0.19502	0.413805	MGP_C57BL6NJ_G0033450(Prkcb)	http://www.kegg.jp/kegg-bin/show_pathway?map04540/K19662%09%23FFFFFF,red/
mmu04012	ErbB signaling pathway	Environmental Information Processing	Signal transduction	1	72	0.197483	0.413805	MGP_C57BL6NJ_G0033450(Prkcb)	http://www.kegg.jp/kegg-bin/show_pathway?map04012/K19662%09%23FFFFFF,red/
mmu04911	Insulin secretion	Organismal Systems	Endocrine system	1	73	0.199939	0.413805	MGP_C57BL6NJ_G0033450(Prkcb)	http://www.kegg.jp/kegg-bin/show_pathway?map04911/K19662%09%23FFFFFF,red/
mmu05322	Systemic lupus erythematosus	Human Diseases	Immune diseases	1	74	0.202387	0.413805	MGP_C57BL6NJ_G0016967(Trove2)	http://www.kegg.jp/kegg-bin/show_pathway?map05322/K11089%09%23FFFFFF,red/
mmu04912	GnRH signaling pathway	Organismal Systems	Endocrine system	1	76	0.207263	0.413805	MGP_C57BL6NJ_G0033450(Prkcb)	http://www.kegg.jp/kegg-bin/show_pathway?map04912/K19662%09%23FFFFFF,red/
mmu04080	Neuroactive ligand-receptor interaction	Environmental Information Processing	Signaling molecules and interaction	2	279	0.20806	0.413805	MGP_C57BL6NJ_G0020565(Vipr2),MGP_C57BL6NJ_G0021587(Ptger2)	http://www.kegg.jp/kegg-bin/show_pathway?map04080/K04590%09%23FFFFFF,red/K04259%09%23FFFFFF,red/
mmu05231	Choline metabolism in cancer	Human Diseases	Cancers: Overview	1	78	0.212109	0.413805	MGP_C57BL6NJ_G0033450(Prkcb)	http://www.kegg.jp/kegg-bin/show_pathway?map05231/K19662%09%23FFFFFF,red/
mmu04972	Pancreatic secretion	Organismal Systems	Digestive system	1	79	0.214521	0.413805	MGP_C57BL6NJ_G0033450(Prkcb)	http://www.kegg.jp/kegg-bin/show_pathway?map04972/K19662%09%23FFFFFF,red/
mmu03015	mRNA surveillance pathway	Genetic Information Processing	Translation	1	79	0.214521	0.413805	MGP_C57BL6NJ_G0021906(Ppp2r2a)	http://www.kegg.jp/kegg-bin/show_pathway?map03015/K04354%09%23FFFFFF,red/
mmu04064	NF-kappa B signaling pathway	Environmental Information Processing	Signal transduction	1	79	0.214521	0.413805	MGP_C57BL6NJ_G0033450(Prkcb)	http://www.kegg.jp/kegg-bin/show_pathway?map04064/K19662%09%23FFFFFF,red/
mmu04070	Phosphatidylinositol signaling system	Environmental Information Processing	Signal transduction	1	82	0.221715	0.413805	MGP_C57BL6NJ_G0033450(Prkcb)	http://www.kegg.jp/kegg-bin/show_pathway?map04070/K19662%09%23FFFFFF,red/
mmu04640	Hematopoietic cell lineage	Organismal Systems	Immune system	1	83	0.224098	0.413805	MGP_C57BL6NJ_G0017366(Cd34)	http://www.kegg.jp/kegg-bin/show_pathway?map04640/K06474%09%23FFFFFF,red/
mmu04066	HIF-1 signaling pathway	Environmental Information Processing	Signal transduction	1	85	0.228844	0.413805	MGP_C57BL6NJ_G0033450(Prkcb)	http://www.kegg.jp/kegg-bin/show_pathway?map04066/K19662%09%23FFFFFF,red/
mmu04713	Circadian entrainment	Organismal Systems	Environmental adaptation	1	85	0.228844	0.413805	MGP_C57BL6NJ_G0033450(Prkcb)	http://www.kegg.jp/kegg-bin/show_pathway?map04713/K19662%09%23FFFFFF,red/
mmu04916	Melanogenesis	Organismal Systems	Endocrine system	1	85	0.228844	0.413805	MGP_C57BL6NJ_G0033450(Prkcb)	http://www.kegg.jp/kegg-bin/show_pathway?map04916/K19662%09%23FFFFFF,red/
mmu04925	Aldosterone synthesis and secretion	Organismal Systems	Endocrine system	1	86	0.231207	0.413805	MGP_C57BL6NJ_G0033450(Prkcb)	http://www.kegg.jp/kegg-bin/show_pathway?map04925/K19662%09%23FFFFFF,red/
mmu04928	Parathyroid hormone synthesis, secretion and action	Organismal Systems	Endocrine system	1	88	0.23591	0.413805	MGP_C57BL6NJ_G0033450(Prkcb)	http://www.kegg.jp/kegg-bin/show_pathway?map04928/K19662%09%23FFFFFF,red/
mmu05146	Amoebiasis	Human Diseases	Infectious diseases: Parasitic	1	89	0.238252	0.413805	MGP_C57BL6NJ_G0033450(Prkcb)	http://www.kegg.jp/kegg-bin/show_pathway?map05146/K19662%09%23FFFFFF,red/
mmu05142	Chagas disease (American trypanosomiasis)	Human Diseases	Infectious diseases: Parasitic	1	89	0.238252	0.413805	MGP_C57BL6NJ_G0021906(Ppp2r2a)	http://www.kegg.jp/kegg-bin/show_pathway?map05142/K04354%09%23FFFFFF,red/
mmu04933	AGE-RAGE signaling pathway in diabetic complications	Human Diseases	Endocrine and metabolic diseases	1	89	0.238252	0.413805	MGP_C57BL6NJ_G0033450(Prkcb)	http://www.kegg.jp/kegg-bin/show_pathway?map04933/K19662%09%23FFFFFF,red/
mmu04919	Thyroid hormone signaling pathway	Organismal Systems	Endocrine system	1	93	0.247547	0.416293	MGP_C57BL6NJ_G0033450(Prkcb)	http://www.kegg.jp/kegg-bin/show_pathway?map04919/K19662%09%23FFFFFF,red/
mmu04931	Insulin resistance	Human Diseases	Endocrine and metabolic diseases	1	98	0.259012	0.416293	MGP_C57BL6NJ_G0033450(Prkcb)	http://www.kegg.jp/kegg-bin/show_pathway?map04931/K19662%09%23FFFFFF,red/
mmu04725	Cholinergic synapse	Organismal Systems	Nervous system	1	98	0.259012	0.416293	MGP_C57BL6NJ_G0033450(Prkcb)	http://www.kegg.jp/kegg-bin/show_pathway?map04725/K19662%09%23FFFFFF,red/
mmu04724	Glutamatergic synapse	Organismal Systems	Nervous system	1	100	0.26355	0.416293	MGP_C57BL6NJ_G0033450(Prkcb)	http://www.kegg.jp/kegg-bin/show_pathway?map04724/K19662%09%23FFFFFF,red/
mmu04650	Natural killer cell mediated cytotoxicity	Organismal Systems	Immune system	1	102	0.268061	0.416293	MGP_C57BL6NJ_G0033450(Prkcb)	http://www.kegg.jp/kegg-bin/show_pathway?map04650/K19662%09%23FFFFFF,red/
mmu04152	AMPK signaling pathway	Environmental Information Processing	Signal transduction	1	103	0.270306	0.416293	MGP_C57BL6NJ_G0021906(Ppp2r2a)	http://www.kegg.jp/kegg-bin/show_pathway?map04152/K04354%09%23FFFFFF,red/
mmu04670	Leukocyte transendothelial migration	Organismal Systems	Immune system	1	103	0.270306	0.416293	MGP_C57BL6NJ_G0033450(Prkcb)	http://www.kegg.jp/kegg-bin/show_pathway?map04670/K19662%09%23FFFFFF,red/
mmu04380	Osteoclast differentiation	Organismal Systems	Development	1	106	0.277002	0.416293	MGP_C57BL6NJ_G0033002(Gab2)	http://www.kegg.jp/kegg-bin/show_pathway?map04380/K08091%09%23FFFFFF,red/
mmu05012	Parkinson's disease	Human Diseases	Neurodegenerative diseases	1	110	0.285837	0.416293	MGP_C57BL6NJ_G0026261(Atp5g3)	http://www.kegg.jp/kegg-bin/show_pathway?map05012/K02128%09%23FFFFFF,red/
mmu04142	Lysosome	Cellular Processes	Transport and catabolism	1	112	0.290215	0.416293	MGP_C57BL6NJ_G0021924(Gm21685)	http://www.kegg.jp/kegg-bin/show_pathway?map04142/K12305%09%23FFFFFF,red/
mmu00190	Oxidative phosphorylation	Metabolism	Energy metabolism	1	113	0.292395	0.416293	MGP_C57BL6NJ_G0026261(Atp5g3)	http://www.kegg.jp/kegg-bin/show_pathway?map00190/K02128%09%23FFFFFF,red/
mmu04726	Serotonergic synapse	Organismal Systems	Nervous system	1	114	0.294567	0.416293	MGP_C57BL6NJ_G0033450(Prkcb)	http://www.kegg.jp/kegg-bin/show_pathway?map04726/K19662%09%23FFFFFF,red/
mmu04270	Vascular smooth muscle contraction	Organismal Systems	Circulatory system	1	114	0.294567	0.416293	MGP_C57BL6NJ_G0033450(Prkcb)	http://www.kegg.jp/kegg-bin/show_pathway?map04270/K19662%09%23FFFFFF,red/
mmu04072	Phospholipase D signaling pathway	Environmental Information Processing	Signal transduction	1	118	0.303194	0.416293	MGP_C57BL6NJ_G0033002(Gab2)	http://www.kegg.jp/kegg-bin/show_pathway?map04072/K08091%09%23FFFFFF,red/
mmu04261	Adrenergic signaling in cardiomyocytes	Organismal Systems	Circulatory system	1	121	0.309596	0.416293	MGP_C57BL6NJ_G0021906(Ppp2r2a)	http://www.kegg.jp/kegg-bin/show_pathway?map04261/K04354%09%23FFFFFF,red/
mmu04723	Retrograde endocannabinoid signaling	Organismal Systems	Nervous system	1	125	0.318043	0.416293	MGP_C57BL6NJ_G0033450(Prkcb)	http://www.kegg.jp/kegg-bin/show_pathway?map04723/K19662%09%23FFFFFF,red/
mmu05161	Hepatitis B	Human Diseases	Infectious diseases: Viral	1	126	0.320139	0.416293	MGP_C57BL6NJ_G0033450(Prkcb)	http://www.kegg.jp/kegg-bin/show_pathway?map05161/K19662%09%23FFFFFF,red/
mmu04514	Cell adhesion molecules (CAMs)	Environmental Information Processing	Signaling molecules and interaction	1	129	0.32639	0.416293	MGP_C57BL6NJ_G0017366(Cd34)	http://www.kegg.jp/kegg-bin/show_pathway?map04514/K06474%09%23FFFFFF,red/
mmu04310	Wnt signaling pathway	Environmental Information Processing	Signal transduction	1	131	0.330526	0.416293	MGP_C57BL6NJ_G0033450(Prkcb)	http://www.kegg.jp/kegg-bin/show_pathway?map04310/K19662%09%23FFFFFF,red/
mmu04390	Hippo signaling pathway	Environmental Information Processing	Signal transduction	1	132	0.332584	0.416293	MGP_C57BL6NJ_G0021906(Ppp2r2a)	http://www.kegg.jp/kegg-bin/show_pathway?map04390/K04354%09%23FFFFFF,red/
mmu05160	Hepatitis C	Human Diseases	Infectious diseases: Viral	1	134	0.336683	0.416293	MGP_C57BL6NJ_G0021906(Ppp2r2a)	http://www.kegg.jp/kegg-bin/show_pathway?map05160/K04354%09%23FFFFFF,red/
mmu04150	mTOR signaling pathway	Environmental Information Processing	Signal transduction	1	134	0.336683	0.416293	MGP_C57BL6NJ_G0033450(Prkcb)	http://www.kegg.jp/kegg-bin/show_pathway?map04150/K19662%09%23FFFFFF,red/
mmu05202	Transcriptional misregulation in cancer	Human Diseases	Cancers: Overview	1	135	0.338724	0.416293	MGP_C57BL6NJ_G0035015(Fli1)	http://www.kegg.jp/kegg-bin/show_pathway?map05202/K09436%09%23FFFFFF,red/
mmu04921	Oxytocin signaling pathway	Organismal Systems	Endocrine system	1	136	0.340758	0.416293	MGP_C57BL6NJ_G0033450(Prkcb)	http://www.kegg.jp/kegg-bin/show_pathway?map04921/K19662%09%23FFFFFF,red/
mmu04141	Protein processing in endoplasmic reticulum	Genetic Information Processing	Folding, sorting and degradation	1	138	0.344808	0.416293	MGP_C57BL6NJ_G0028083(Man1a2)	http://www.kegg.jp/kegg-bin/show_pathway?map04141/K01230%09%23FFFFFF,red/
mmu05225	Hepatocellular carcinoma	Human Diseases	Cancers: Specific types	1	142	0.352836	0.41819	MGP_C57BL6NJ_G0033450(Prkcb)	http://www.kegg.jp/kegg-bin/show_pathway?map05225/K19662%09%23FFFFFF,red/
mmu05010	Alzheimer's disease	Human Diseases	Neurodegenerative diseases	1	143	0.354828	0.41819	MGP_C57BL6NJ_G0026261(Atp5g3)	http://www.kegg.jp/kegg-bin/show_pathway?map05010/K02128%09%23FFFFFF,red/
mmu04530	Tight junction	Cellular Processes	Cellular community - eukaryotes	1	148	0.364698	0.424766	MGP_C57BL6NJ_G0021906(Ppp2r2a)	http://www.kegg.jp/kegg-bin/show_pathway?map04530/K04354%09%23FFFFFF,red/
mmu04360	Axon guidance	Organismal Systems	Development	1	152	0.372489	0.428795	MGP_C57BL6NJ_G0034792(Nrp1)	http://www.kegg.jp/kegg-bin/show_pathway?map04360/K06724%09%23FFFFFF,red/
mmu05016	Huntington's disease	Human Diseases	Neurodegenerative diseases	1	155	0.378271	0.430446	MGP_C57BL6NJ_G0026261(Atp5g3)	http://www.kegg.jp/kegg-bin/show_pathway?map05016/K02128%09%23FFFFFF,red/
mmu04020	Calcium signaling pathway	Environmental Information Processing	Signal transduction	1	164	0.395307	0.44472	MGP_C57BL6NJ_G0033450(Prkcb)	http://www.kegg.jp/kegg-bin/show_pathway?map04020/K19662%09%23FFFFFF,red/
mmu05200	Pathways in cancer	Human Diseases	Cancers: Overview	2	451	0.401059	0.445031	MGP_C57BL6NJ_G0033450(Prkcb),MGP_C57BL6NJ_G0021587(Ptger2)	http://www.kegg.jp/kegg-bin/show_pathway?map05200/K19662%09%23FFFFFF,red/K04259%09%23FFFFFF,red/
mmu04062	Chemokine signaling pathway	Organismal Systems	Immune system	1	169	0.404574	0.445031	MGP_C57BL6NJ_G0033450(Prkcb)	http://www.kegg.jp/kegg-bin/show_pathway?map04062/K19662%09%23FFFFFF,red/
mmu04510	Focal adhesion	Cellular Processes	Cellular community - eukaryotes	1	174	0.413703	0.450073	MGP_C57BL6NJ_G0033450(Prkcb)	http://www.kegg.jp/kegg-bin/show_pathway?map04510/K19662%09%23FFFFFF,red/
mmu05205	Proteoglycans in cancer	Human Diseases	Cancers: Overview	1	177	0.419115	0.451004	MGP_C57BL6NJ_G0033450(Prkcb)	http://www.kegg.jp/kegg-bin/show_pathway?map05205/K19662%09%23FFFFFF,red/
mmu04015	Rap1 signaling pathway	Environmental Information Processing	Signal transduction	1	183	0.429794	0.457522	MGP_C57BL6NJ_G0033450(Prkcb)	http://www.kegg.jp/kegg-bin/show_pathway?map04015/K19662%09%23FFFFFF,red/
mmu04714	Thermogenesis	Organismal Systems	Environmental adaptation	1	190	0.44201	0.465522	MGP_C57BL6NJ_G0026261(Atp5g3)	http://www.kegg.jp/kegg-bin/show_pathway?map04714/K02128%09%23FFFFFF,red/
mmu05166	HTLV-I infection	Human Diseases	Infectious diseases: Viral	1	194	0.448877	0.467777	MGP_C57BL6NJ_G0034792(Nrp1)	http://www.kegg.jp/kegg-bin/show_pathway?map05166/K06724%09%23FFFFFF,red/
mmu04010	MAPK signaling pathway	Environmental Information Processing	Signal transduction	1	260	0.550984	0.568203	MGP_C57BL6NJ_G0033450(Prkcb)	http://www.kegg.jp/kegg-bin/show_pathway?map04010/K19662%09%23FFFFFF,red/
mmu05165	Human papillomavirus infection	Human Diseases	Infectious diseases: Viral	1	298	0.601157	0.613552	MGP_C57BL6NJ_G0021906(Ppp2r2a)	http://www.kegg.jp/kegg-bin/show_pathway?map05165/K04354%09%23FFFFFF,red/
mmu04151	PI3K-Akt signaling pathway	Environmental Information Processing	Signal transduction	1	311	0.617035	0.623331	MGP_C57BL6NJ_G0021906(Ppp2r2a)	http://www.kegg.jp/kegg-bin/show_pathway?map04151/K04354%09%23FFFFFF,red/
mmu04740	Olfactory transduction	Organismal Systems	Sensory system	2	942	0.792436	0.792436	MGP_C57BL6NJ_G0024119(Olfr114),MGP_C57BL6NJ_G0031611(Olfr215)	http://www.kegg.jp/kegg-bin/show_pathway?map04740/K04257%09%23FFFFFF,red/
