# Supplementary material for: LncRNA-mRNA Expression Profiles of Osteoclast After Conditional Knockout HIF-1α
Source: Front Genet. 2022 Jun 21;13:909095. doi: 10.3389/fgene.2022.909095 (PMC9253292; doi:10.3389/fgene.2022.909095)
Supplement: Supplementary file 6 [file Table4.XLSX]

## Sheet: Sheet1
Gene ID	Chromosome	Start Site	End Site	Direction	Length	Name	GO	KEGG	Description
MGP_C57BL6NJ_G0016429	1	58926675	59126707	-	6788	Satb2	GO:0000118;GO:0000122;GO:0000790;GO:0000977;GO:0000978;GO:0001077;GO:0001227;GO:0001764;GO:0002076;GO:0003677;GO:0003677;GO:0003677;GO:0003682;GO:0005515;GO:0005515;GO:0005634;GO:0005634;GO:0005634;GO:0005654;GO:0005654;GO:0005667;GO:0006325;GO:0006338;GO:0006351;GO:0006355;GO:0006366;GO:0007275;GO:0009880;GO:0010468;GO:0016363;GO:0016569;GO:0021902;GO:0043565;GO:0043565;GO:0045944;GO:0045944;GO:…	-	special AT-rich sequence binding protein 2[Source:MGI Symbol;Acc:MGI:2679336]
MGP_C57BL6NJ_G0016429	1	58926675	59126707	-	6788	Satb2	GO:0000118;GO:0000122;GO:0000790;GO:0000977;GO:0000978;GO:0001077;GO:0001227;GO:0001764;GO:0002076;GO:0003677;GO:0003677;GO:0003677;GO:0003682;GO:0005515;GO:0005515;GO:0005634;GO:0005634;GO:0005634;GO:0005654;GO:0005654;GO:0005667;GO:0006325;GO:0006338;GO:0006351;GO:0006355;GO:0006366;GO:0007275;GO:0009880;GO:0010468;GO:0016363;GO:0016569;GO:0021902;GO:0043565;GO:0043565;GO:0045944;GO:0045944;GO:…	-	special AT-rich sequence binding protein 2[Source:MGI Symbol;Acc:MGI:2679336]
MGP_C57BL6NJ_G0016429	1	58926675	59126707	-	6788	Satb2	GO:0000118;GO:0000122;GO:0000790;GO:0000977;GO:0000978;GO:0001077;GO:0001227;GO:0001764;GO:0002076;GO:0003677;GO:0003677;GO:0003677;GO:0003682;GO:0005515;GO:0005515;GO:0005634;GO:0005634;GO:0005634;GO:0005654;GO:0005654;GO:0005667;GO:0006325;GO:0006338;GO:0006351;GO:0006355;GO:0006366;GO:0007275;GO:0009880;GO:0010468;GO:0016363;GO:0016569;GO:0021902;GO:0043565;GO:0043565;GO:0045944;GO:0045944;GO:…	-	special AT-rich sequence binding protein 2[Source:MGI Symbol;Acc:MGI:2679336]
MGP_C57BL6NJ_G0016429	1	58926675	59126707	-	6788	Satb2	GO:0000118;GO:0000122;GO:0000790;GO:0000977;GO:0000978;GO:0001077;GO:0001227;GO:0001764;GO:0002076;GO:0003677;GO:0003677;GO:0003677;GO:0003682;GO:0005515;GO:0005515;GO:0005634;GO:0005634;GO:0005634;GO:0005654;GO:0005654;GO:0005667;GO:0006325;GO:0006338;GO:0006351;GO:0006355;GO:0006366;GO:0007275;GO:0009880;GO:0010468;GO:0016363;GO:0016569;GO:0021902;GO:0043565;GO:0043565;GO:0045944;GO:0045944;GO:…	-	special AT-rich sequence binding protein 2[Source:MGI Symbol;Acc:MGI:2679336]
MGP_C57BL6NJ_G0029869	5	32783055	32856782	-	10309	Prr14l	GO:0003674;GO:0005575;GO:0008150;	-	proline rich 14-like [Source:MGISymbol;Acc:MGI:2443658]
MGP_C57BL6NJ_G0016429	1	58926675	59126707	-	6788	Satb2	GO:0000118;GO:0000122;GO:0000790;GO:0000977;GO:0000978;GO:0001077;GO:0001227;GO:0001764;GO:0002076;GO:0003677;GO:0003677;GO:0003677;GO:0003682;GO:0005515;GO:0005515;GO:0005634;GO:0005634;GO:0005634;GO:0005654;GO:0005654;GO:0005667;GO:0006325;GO:0006338;GO:0006351;GO:0006355;GO:0006366;GO:0007275;GO:0009880;GO:0010468;GO:0016363;GO:0016569;GO:0021902;GO:0043565;GO:0043565;GO:0045944;GO:0045944;GO:…	-	special AT-rich sequence binding protein 2[Source:MGI Symbol;Acc:MGI:2679336]
MGP_C57BL6NJ_G0016429	1	58926675	59126707	-	6788	Satb2	GO:0000118;GO:0000122;GO:0000790;GO:0000977;GO:0000978;GO:0001077;GO:0001227;GO:0001764;GO:0002076;GO:0003677;GO:0003677;GO:0003677;GO:0003682;GO:0005515;GO:0005515;GO:0005634;GO:0005634;GO:0005634;GO:0005654;GO:0005654;GO:0005667;GO:0006325;GO:0006338;GO:0006351;GO:0006355;GO:0006366;GO:0007275;GO:0009880;GO:0010468;GO:0016363;GO:0016569;GO:0021902;GO:0043565;GO:0043565;GO:0045944;GO:0045944;GO:…	-	special AT-rich sequence binding protein 2[Source:MGI Symbol;Acc:MGI:2679336]
MGP_C57BL6NJ_G0024409	17	76113453	76234861	+	5672	Myom1	GO:0005200;GO:0005737;GO:0005856;GO:0005859;GO:0005865;GO:0006936;GO:0006941;GO:0007015;GO:0008307;GO:0010628;GO:0010737;GO:0019900;GO:0030017;GO:0030018;GO:0030240;GO:0030241;GO:0031430;GO:0031430;GO:0031430;GO:0032982;GO:0042802;GO:0042803;GO:0045214;GO:0048739;GO:0050714;GO:0051015;GO:0051371;GO:0055003;GO:0055008;GO:0071688;GO:0097493;GO:0006936;GO:0030017;GO:0031430;GO:0042803;	-	myomesin 1 [Source:MGI Symbol;Acc:MGI:1341430]"
MGP_C57BL6NJ_G0016429	1	58926675	59126707	-	6788	Satb2	GO:0000118;GO:0000122;GO:0000790;GO:0000977;GO:0000978;GO:0001077;GO:0001227;GO:0001764;GO:0002076;GO:0003677;GO:0003677;GO:0003677;GO:0003682;GO:0005515;GO:0005515;GO:0005634;GO:0005634;GO:0005634;GO:0005654;GO:0005654;GO:0005667;GO:0006325;GO:0006338;GO:0006351;GO:0006355;GO:0006366;GO:0007275;GO:0009880;GO:0010468;GO:0016363;GO:0016569;GO:0021902;GO:0043565;GO:0043565;GO:0045944;GO:0045944;GO:…	-	special AT-rich sequence binding protein 2[Source:MGI Symbol;Acc:MGI:2679336]
MGP_C57BL6NJ_G0016429	1	58926675	59126707	-	6788	Satb2	GO:0000118;GO:0000122;GO:0000790;GO:0000977;GO:0000978;GO:0001077;GO:0001227;GO:0001764;GO:0002076;GO:0003677;GO:0003677;GO:0003677;GO:0003682;GO:0005515;GO:0005515;GO:0005634;GO:0005634;GO:0005634;GO:0005654;GO:0005654;GO:0005667;GO:0006325;GO:0006338;GO:0006351;GO:0006355;GO:0006366;GO:0007275;GO:0009880;GO:0010468;GO:0016363;GO:0016569;GO:0021902;GO:0043565;GO:0043565;GO:0045944;GO:0045944;GO:…	-	special AT-rich sequence binding protein 2[Source:MGI Symbol;Acc:MGI:2679336]
MGP_C57BL6NJ_G0016429	1	58926675	59126707	-	6788	Satb2	GO:0000118;GO:0000122;GO:0000790;GO:0000977;GO:0000978;GO:0001077;GO:0001227;GO:0001764;GO:0002076;GO:0003677;GO:0003677;GO:0003677;GO:0003682;GO:0005515;GO:0005515;GO:0005634;GO:0005634;GO:0005634;GO:0005654;GO:0005654;GO:0005667;GO:0006325;GO:0006338;GO:0006351;GO:0006355;GO:0006366;GO:0007275;GO:0009880;GO:0010468;GO:0016363;GO:0016569;GO:0021902;GO:0043565;GO:0043565;GO:0045944;GO:0045944;GO:…	-	special AT-rich sequence binding protein 2[Source:MGI Symbol;Acc:MGI:2679336]
MGP_C57BL6NJ_G0016429	1	58926675	59126707	-	6788	Satb2	GO:0000118;GO:0000122;GO:0000790;GO:0000977;GO:0000978;GO:0001077;GO:0001227;GO:0001764;GO:0002076;GO:0003677;GO:0003677;GO:0003677;GO:0003682;GO:0005515;GO:0005515;GO:0005634;GO:0005634;GO:0005634;GO:0005654;GO:0005654;GO:0005667;GO:0006325;GO:0006338;GO:0006351;GO:0006355;GO:0006366;GO:0007275;GO:0009880;GO:0010468;GO:0016363;GO:0016569;GO:0021902;GO:0043565;GO:0043565;GO:0045944;GO:0045944;GO:…	-	special AT-rich sequence binding protein 2[Source:MGI Symbol;Acc:MGI:2679336]
MGP_C57BL6NJ_G0020351	12	88974857	88998939	+	955	Batf	GO:0000978;GO:0000978;GO:0000978;GO:0001077;GO:0001077;GO:0001816;GO:0001816;GO:0002320;GO:0002320;GO:0003677;GO:0003677;GO:0003700;GO:0003700;GO:0003700;GO:0005515;GO:0005515;GO:0005634;GO:0005634;GO:0005634;GO:0005654;GO:0005737;GO:0005737;GO:0006351;GO:0006355;GO:0006355;GO:0006357;GO:0006366;GO:0006974;GO:0006974;GO:0030154;GO:0030154;GO:0030330;GO:0030330;GO:0042832;GO:0042832;GO:0043011;GO:…	K09034	basic leucine zipper transcription factor, ATF-like[Source:MGI Symbol;Acc:MGI:1859147]
MGP_C57BL6NJ_G0016429	1	58926675	59126707	-	6788	Satb2	GO:0000118;GO:0000122;GO:0000790;GO:0000977;GO:0000978;GO:0001077;GO:0001227;GO:0001764;GO:0002076;GO:0003677;GO:0003677;GO:0003677;GO:0003682;GO:0005515;GO:0005515;GO:0005634;GO:0005634;GO:0005634;GO:0005654;GO:0005654;GO:0005667;GO:0006325;GO:0006338;GO:0006351;GO:0006355;GO:0006366;GO:0007275;GO:0009880;GO:0010468;GO:0016363;GO:0016569;GO:0021902;GO:0043565;GO:0043565;GO:0045944;GO:0045944;GO:…	-	special AT-rich sequence binding protein 2[Source:MGI Symbol;Acc:MGI:2679336]
MGP_C57BL6NJ_G0016429	1	58926675	59126707	-	6788	Satb2	GO:0000118;GO:0000122;GO:0000790;GO:0000977;GO:0000978;GO:0001077;GO:0001227;GO:0001764;GO:0002076;GO:0003677;GO:0003677;GO:0003677;GO:0003682;GO:0005515;GO:0005515;GO:0005634;GO:0005634;GO:0005634;GO:0005654;GO:0005654;GO:0005667;GO:0006325;GO:0006338;GO:0006351;GO:0006355;GO:0006366;GO:0007275;GO:0009880;GO:0010468;GO:0016363;GO:0016569;GO:0021902;GO:0043565;GO:0043565;GO:0045944;GO:0045944;GO:…	-	special AT-rich sequence binding protein 2[Source:MGI Symbol;Acc:MGI:2679336]
MGP_C57BL6NJ_G0021900	14	64128064	64232726	+	8144	Adra1a	GO:0001985;GO:0001994;GO:0001994;GO:0001996;GO:0001997;GO:0003084;GO:0004871;GO:0004930;GO:0004930;GO:0004935;GO:0004935;GO:0004937;GO:0004937;GO:0004937;GO:0005634;GO:0005634;GO:0005737;GO:0005737;GO:0005886;GO:0005886;GO:0005887;GO:0005901;GO:0006937;GO:0007165;GO:0007186;GO:0007186;GO:0007188;GO:0007200;GO:0007200;GO:0007202;GO:0007204;GO:0007204;GO:0007267;GO:0007512;GO:0007568;GO:0009725;GO:…	-	adrenergic receptor, alpha 1a [Source:MGISymbol;Acc:MGI:104773]
MGP_C57BL6NJ_G0029285	4	138855570	139014442	-	8811	Epb41	GO:0001558;GO:0003779;GO:0003779;GO:0003779;GO:0005198;GO:0005200;GO:0005516;GO:0005545;GO:0005634;GO:0005737;GO:0005737;GO:0005829;GO:0005856;GO:0005856;GO:0005886;GO:0005886;GO:0005886;GO:0005911;GO:0005938;GO:0006810;GO:0007010;GO:0007016;GO:0007049;GO:0008022;GO:0008092;GO:0008360;GO:0009898;GO:0014069;GO:0015629;GO:0016020;GO:0030036;GO:0030054;GO:0030507;GO:0030863;GO:0030866;GO:0031032;GO:…	-	erythrocyte membrane protein band 4.1 [Source:MGISymbol;Acc:MGI:95401]
MGP_C57BL6NJ_G0016429	1	58926675	59126707	-	6788	Satb2	GO:0000118;GO:0000122;GO:0000790;GO:0000977;GO:0000978;GO:0001077;GO:0001227;GO:0001764;GO:0002076;GO:0003677;GO:0003677;GO:0003677;GO:0003682;GO:0005515;GO:0005515;GO:0005634;GO:0005634;GO:0005634;GO:0005654;GO:0005654;GO:0005667;GO:0006325;GO:0006338;GO:0006351;GO:0006355;GO:0006366;GO:0007275;GO:0009880;GO:0010468;GO:0016363;GO:0016569;GO:0021902;GO:0043565;GO:0043565;GO:0045944;GO:0045944;GO:…	-	special AT-rich sequence binding protein 2[Source:MGI Symbol;Acc:MGI:2679336]
MGP_C57BL6NJ_G0035015	9	31193748	31323027	-	3458	Fli1	GO:0000978;GO:0000978;GO:0000980;GO:0000980;GO:0000981;GO:0001077;GO:0001077;GO:0003677;GO:0003682;GO:0003682;GO:0003700;GO:0005634;GO:0005634;GO:0005634;GO:0005634;GO:0005634;GO:0005829;GO:0006351;GO:0006355;GO:0006355;GO:0006355;GO:0006355;GO:0006357;GO:0006366;GO:0008015;GO:0008015;GO:0009887;GO:0009887;GO:0009987;GO:0016604;GO:0030154;GO:0035855;GO:0035855;GO:0043565;GO:0043565;GO:0043565;GO:…	K09436	Friend leukemia integration 1 [Source:MGISymbol;Acc:MGI:95554]
MGP_C57BL6NJ_G0021322	13	118447105	118488425	+	5493	Il6st	GO:0004896;GO:0004896;GO:0004897;GO:0004915;GO:0004921;GO:0004923;GO:0004924;GO:0005127;GO:0005127;GO:0005138;GO:0005515;GO:0005515;GO:0005615;GO:0005886;GO:0005896;GO:0005896;GO:0005900;GO:0005900;GO:0005977;GO:0006642;GO:0007165;GO:0008284;GO:0008284;GO:0008593;GO:0009897;GO:0009897;GO:0014911;GO:0016020;GO:0016020;GO:0016020;GO:0016021;GO:0019221;GO:0019838;GO:0019955;GO:0019970;GO:0019981;GO:…	-	interleukin 6 signal transducer [Source:MGISymbol;Acc:MGI:96560]
MGP_C57BL6NJ_G0031664	6	128879881	128902934	+	3065	Mfap5	GO:0001527;GO:0001527;GO:0001527;GO:0005515;GO:0005576;GO:0005578;GO:0005578;GO:0005615;GO:0030023;GO:0030023;GO:0031012;GO:0060216;GO:0062023;GO:0097435;GO:0005578;GO:0005615;GO:0031012;GO:0060216;GO:0097435;	-	microfibrillar associated protein 5 [Source:MGISymbol;Acc:MGI:1354387]
MGP_C57BL6NJ_G0021878	14	62167616	62311275	-	9811	Hmbox1	GO:0000122;GO:0000784;GO:0000784;GO:0003677;GO:0003677;GO:0003691;GO:0003720;GO:0005515;GO:0005634;GO:0005634;GO:0005634;GO:0005634;GO:0005654;GO:0005697;GO:0005737;GO:0005737;GO:0005829;GO:0006278;GO:0006351;GO:0006355;GO:0016604;GO:0032212;GO:0032403;GO:0032403;GO:0035563;GO:0042162;GO:0042162;GO:0042802;GO:0043565;GO:0043565;GO:0044877;GO:0044877;GO:0045892;GO:0045892;GO:0045893;GO:0051973;GO:…	-	homeobox containing 1 [Source:MGISymbol;Acc:MGI:2445066]
MGP_C57BL6NJ_G0025810	2	21228739	21277392	+	4248	Pdss1	GO:0000010;GO:0005739;GO:0006744;GO:0008299;GO:0046982;GO:0050347;GO:0051290;GO:1990234;	K12504	prenyl (solanesyl) diphosphate synthase, subunit 1[Source:MGI Symbol;Acc:MGI:1889278]
MGP_C57BL6NJ_G0026118	2	37553941	38065863	-	15294	Dennd1a	GO:0005085;GO:0005515;GO:0005515;GO:0005654;GO:0005829;GO:0005829;GO:0005886;GO:0006810;GO:0006897;GO:0006897;GO:0006897;GO:0008289;GO:0015031;GO:0016020;GO:0017112;GO:0017112;GO:0017112;GO:0017112;GO:0017124;GO:0017124;GO:0017137;GO:0017137;GO:0017137;GO:0030054;GO:0030136;GO:0030136;GO:0030136;GO:0030425;GO:0030425;GO:0030665;GO:0030665;GO:0030665;GO:0031410;GO:0032266;GO:0032266;GO:0032456;GO:…	K20160	DENN/MADD domain containing 1A [Source:MGISymbol;Acc:MGI:2442794]
MGP_C57BL6NJ_G0036487	X	103933460	104080580	-	5905	Abcb7	GO:0000166;GO:0005524;GO:0005524;GO:0005739;GO:0005739;GO:0005739;GO:0005743;GO:0005743;GO:0005743;GO:0005743;GO:0006810;GO:0006879;GO:0006879;GO:0006879;GO:0016020;GO:0016021;GO:0016021;GO:0016887;GO:0042626;GO:0055085;	K05662	ATP-binding cassette, sub-family B (MDR/TAP),member 7 [Source:MGI Symbol;Acc:MGI:109533]
MGP_C57BL6NJ_G0034792	8	136586172	136742155	+	6000	Nrp1	GO:0001525;GO:0001525;GO:0001525;GO:0001525;GO:0001525;GO:0001569;GO:0001569;GO:0001569;GO:0001764;GO:0001764;GO:0002040;GO:0002040;GO:0002042;GO:0002042;GO:0003148;GO:0003148;GO:0005021;GO:0005021;GO:0005021;GO:0005021;GO:0005096;GO:0005515;GO:0005515;GO:0005515;GO:0005515;GO:0005615;GO:0005769;GO:0005769;GO:0005829;GO:0005883;GO:0005883;GO:0005886;GO:0005886;GO:0005886;GO:0005886;GO:0005925;GO:…	K06724	neuropilin 1 [Source:MGI Symbol;Acc:MGI:106206]"
MGP_C57BL6NJ_G0029745	5	20230681	20376208	-	4371	Ccdc146	GO:0003674;GO:0005814;GO:0008150;	-	coiled-coil domain containing 146 [Source:MGISymbol;Acc:MGI:1922422]
MGP_C57BL6NJ_G0036143	X	32803860	32812295	-	883	Rhox1	GO:0003677;GO:0003677;GO:0005575;GO:0005634;GO:0008150;	-	reproductive homeobox 1 [Source:MGISymbol;Acc:MGI:3580237]
MGP_C57BL6NJ_G0020402	12	104283110	104453931	-	2069	Efcab11	GO:0005509;GO:0005509;GO:0005575;GO:0005634;GO:0005813;GO:0005825;GO:0007020;GO:0008017;GO:0008150;GO:0019722;GO:0030474;GO:0046872;GO:0070390;GO:1903087;	-	EF-hand calcium binding domain 11 [Source:MGISymbol;Acc:MGI:1926017]
MGP_C57BL6NJ_G0024426	17	79140249	79168308	+	3658	Ehd3	GO:0000166;GO:0001881;GO:0005509;GO:0005515;GO:0005515;GO:0005524;GO:0005525;GO:0005737;GO:0005737;GO:0005768;GO:0005829;GO:0005886;GO:0005925;GO:0005929;GO:0006810;GO:0008289;GO:0015031;GO:0016020;GO:0020018;GO:0020018;GO:0030030;GO:0030139;GO:0030139;GO:0031410;GO:0032456;GO:0032456;GO:0034498;GO:0042995;GO:0043209;GO:0043209;GO:0046872;GO:0048471;GO:0048471;GO:0051260;GO:0051260;GO:0055038;GO:…	K12476	EH-domain containing 3 [Source:MGISymbol;Acc:MGI:1928900]
MGP_C57BL6NJ_G0020259	12	80804228	81282386	+	3397	Gphn	GO:0000166;GO:0003824;GO:0005102;GO:0005515;GO:0005515;GO:0005524;GO:0005622;GO:0005737;GO:0005737;GO:0005737;GO:0005829;GO:0005856;GO:0005886;GO:0006777;GO:0006777;GO:0006777;GO:0006777;GO:0007529;GO:0007529;GO:0008092;GO:0008152;GO:0008940;GO:0010038;GO:0014069;GO:0016020;GO:0016740;GO:0018315;GO:0019897;GO:0030054;GO:0030425;GO:0030425;GO:0030425;GO:0031234;GO:0032324;GO:0032324;GO:0032324;GO:…	K15376	gephyrin [Source:MGI Symbol;Acc:MGI:109602]"
MGP_C57BL6NJ_G0024287	17	54018763	54201640	+	4050	Plcl2	GO:0002322;GO:0002322;GO:0002337;GO:0002337;GO:0004435;GO:0004871;GO:0005737;GO:0006629;GO:0007165;GO:0007165;GO:0007214;GO:0007214;GO:0008081;GO:0032228;GO:0032228;GO:0032228;GO:0033135;GO:0033135;GO:0035556;GO:0050811;GO:0050811;GO:0050859;GO:0050859;GO:0070679;GO:0120163;GO:0120163;GO:1900122;GO:1900122;	K15370	phospholipase C-like 2 [Source:MGISymbol;Acc:MGI:1352756]
MGP_C57BL6NJ_G0035602	9	91734952	91776530	-	12467	Syncrip	GO:0001649;GO:0003676;GO:0003723;GO:0003723;GO:0005634;GO:0005654;GO:0005681;GO:0005737;GO:0005737;GO:0005783;GO:0006397;GO:0008143;GO:0008380;GO:0016020;GO:0017148;GO:0030529;GO:0030529;GO:0043231;GO:0070934;GO:0070937;GO:0070937;GO:0071013;GO:0071204;GO:0071346;GO:0097452;GO:1990904;GO:1990904;GO:0005737;GO:0008143;GO:0071204;	K13160	synaptotagmin binding, cytoplasmic RNA interactingprotein [Source:MGI Symbol;Acc:MGI:1891690]
MGP_C57BL6NJ_G0020259	12	80804228	81282386	+	3397	Gphn	GO:0000166;GO:0003824;GO:0005102;GO:0005515;GO:0005515;GO:0005524;GO:0005622;GO:0005737;GO:0005737;GO:0005737;GO:0005829;GO:0005856;GO:0005886;GO:0006777;GO:0006777;GO:0006777;GO:0006777;GO:0007529;GO:0007529;GO:0008092;GO:0008152;GO:0008940;GO:0010038;GO:0014069;GO:0016020;GO:0016740;GO:0018315;GO:0019897;GO:0030054;GO:0030425;GO:0030425;GO:0030425;GO:0031234;GO:0032324;GO:0032324;GO:0032324;GO:…	K15376	gephyrin [Source:MGI Symbol;Acc:MGI:109602]"
MGP_C57BL6NJ_G0028083	3	105412920	105540616	-	7969	Man1a2	GO:0000139;GO:0000139;GO:0000139;GO:0000139;GO:0003824;GO:0004571;GO:0004571;GO:0004571;GO:0005509;GO:0005783;GO:0005794;GO:0005794;GO:0006486;GO:0006491;GO:0007585;GO:0007585;GO:0008152;GO:0009100;GO:0009100;GO:0016020;GO:0016020;GO:0016020;GO:0016021;GO:0016787;GO:0016798;GO:0046872;GO:0048286;GO:0048286;GO:0070062;	K01230	mannosidase, alpha, class 1A, member 2 [Source:MGISymbol;Acc:MGI:104676]
MGP_C57BL6NJ_G0020645	13	17166896	17207839	-	5580	Stard3nl	-	-	STARD3 N-terminal like [Source:MGISymbol;Acc:MGI:1923455]
MGP_C57BL6NJ_G0021587	14	40268718	40285477	+	3684	Ptger2	GO:0004871;GO:0004930;GO:0004930;GO:0004957;GO:0004957;GO:0004957;GO:0005622;GO:0005886;GO:0006954;GO:0007165;GO:0007186;GO:0007186;GO:0007189;GO:0007189;GO:0007189;GO:0007204;GO:0016020;GO:0016021;GO:0016021;GO:0032496;GO:0032496;GO:0032570;GO:0032570;GO:0042127;GO:0042127;GO:0071380;GO:0071380;GO:0071380;GO:1904346;	K04259	prostaglandin E receptor 2 (subtype EP2)[Source:MGI Symbol;Acc:MGI:97794]
MGP_C57BL6NJ_G0020259	12	80804228	81282386	+	3397	Gphn	GO:0000166;GO:0003824;GO:0005102;GO:0005515;GO:0005515;GO:0005524;GO:0005622;GO:0005737;GO:0005737;GO:0005737;GO:0005829;GO:0005856;GO:0005886;GO:0006777;GO:0006777;GO:0006777;GO:0006777;GO:0007529;GO:0007529;GO:0008092;GO:0008152;GO:0008940;GO:0010038;GO:0014069;GO:0016020;GO:0016740;GO:0018315;GO:0019897;GO:0030054;GO:0030425;GO:0030425;GO:0030425;GO:0031234;GO:0032324;GO:0032324;GO:0032324;GO:…	K15376	gephyrin [Source:MGI Symbol;Acc:MGI:109602]"
MGP_C57BL6NJ_G0016429	1	58926675	59126707	-	6788	Satb2	GO:0000118;GO:0000122;GO:0000790;GO:0000977;GO:0000978;GO:0001077;GO:0001227;GO:0001764;GO:0002076;GO:0003677;GO:0003677;GO:0003677;GO:0003682;GO:0005515;GO:0005515;GO:0005634;GO:0005634;GO:0005634;GO:0005654;GO:0005654;GO:0005667;GO:0006325;GO:0006338;GO:0006351;GO:0006355;GO:0006366;GO:0007275;GO:0009880;GO:0010468;GO:0016363;GO:0016569;GO:0021902;GO:0043565;GO:0043565;GO:0045944;GO:0045944;GO:…	-	special AT-rich sequence binding protein 2[Source:MGI Symbol;Acc:MGI:2679336]
MGP_C57BL6NJ_G0034283	8	75847867	75863046	+	2094	Tmem38a	GO:0005261;GO:0005267;GO:0005634;GO:0006810;GO:0006811;GO:0006813;GO:0015269;GO:0015672;GO:0016020;GO:0016020;GO:0016021;GO:0016529;GO:0031965;GO:0033017;GO:0070062;GO:0071805;	-	transmembrane protein 38A [Source:MGISymbol;Acc:MGI:1921416]
MGP_C57BL6NJ_G0016429	1	58926675	59126707	-	6788	Satb2	GO:0000118;GO:0000122;GO:0000790;GO:0000977;GO:0000978;GO:0001077;GO:0001227;GO:0001764;GO:0002076;GO:0003677;GO:0003677;GO:0003677;GO:0003682;GO:0005515;GO:0005515;GO:0005634;GO:0005634;GO:0005634;GO:0005654;GO:0005654;GO:0005667;GO:0006325;GO:0006338;GO:0006351;GO:0006355;GO:0006366;GO:0007275;GO:0009880;GO:0010468;GO:0016363;GO:0016569;GO:0021902;GO:0043565;GO:0043565;GO:0045944;GO:0045944;GO:…	-	special AT-rich sequence binding protein 2[Source:MGI Symbol;Acc:MGI:2679336]
MGP_C57BL6NJ_G0018462	11	19227849	19235329	-	4115	Lgalsl	GO:0003674;GO:0005622;GO:0008150;GO:0030246;GO:0030246;GO:0062023;	-	lectin, galactoside binding-like [Source:MGISymbol;Acc:MGI:1916114]
MGP_C57BL6NJ_G0022940	16	8363206	8797358	+	5693	Snx29	GO:0003674;GO:0008150;GO:0035091;GO:0070062;	K17935	sorting nexin 29 [Source:MGISymbol;Acc:MGI:1921728]
MGP_C57BL6NJ_G0026135	2	45367130	45507531	-	19901	Zeb2	GO:0000122;GO:0000122;GO:0000790;GO:0001205;GO:0001227;GO:0001755;GO:0001756;GO:0001843;GO:0003676;GO:0003677;GO:0003677;GO:0005634;GO:0005634;GO:0005634;GO:0005730;GO:0005829;GO:0006351;GO:0006355;GO:0006366;GO:0007417;GO:0021540;GO:0021766;GO:0021846;GO:0021957;GO:0030177;GO:0043507;GO:0043565;GO:0045636;GO:0045944;GO:0045944;GO:0046872;GO:0048023;GO:0048066;GO:0048598;GO:0048668;GO:0050772;GO:…	K09299	zinc finger E-box binding homeobox 2 [Source:MGISymbol;Acc:MGI:1344407]
MGP_C57BL6NJ_G0018428	11	5792646	6036509	-	11182	Tns3	GO:0003674;GO:0005829;GO:0005925;GO:0005925;GO:0008284;GO:0008284;GO:0016477;GO:0016477;GO:0030054;GO:0048286;GO:0048286;	K18080	tensin 3 [Source:MGI Symbol;Acc:MGI:2443012]"
MGP_C57BL6NJ_G0024539	18	3916904	3941939	+	2257	Rab18	GO:0000166;GO:0001654;GO:0003924;GO:0003924;GO:0005525;GO:0005525;GO:0005622;GO:0005794;GO:0005886;GO:0006810;GO:0006886;GO:0007275;GO:0007420;GO:0009925;GO:0015031;GO:0016020;GO:0016324;GO:0019003;GO:0019003;GO:0032482;GO:0034389;GO:0034389;GO:0045202;GO:0051170;GO:0051170;GO:0070062;GO:0071782;GO:0071786;	K07910	RAB18, member RAS oncogene family [Source:MGISymbol;Acc:MGI:102790]
MGP_C57BL6NJ_G0030171	5	96862856	96909288	-	6064	Cdkl2	GO:0000166;GO:0004672;GO:0004674;GO:0004693;GO:0004693;GO:0005524;GO:0005524;GO:0005634;GO:0005634;GO:0005634;GO:0005737;GO:0005813;GO:0006468;GO:0006468;GO:0016301;GO:0016310;GO:0016740;GO:0051726;GO:1903955;	K08824	cyclin-dependent kinase-like 2 (CDC2-relatedkinase) [Source:MGI Symbol;Acc:MGI:1858227]
MGP_C57BL6NJ_G0021906	14	64541896	64604428	-	4036	Ppp2r2a	GO:0000159;GO:0000159;GO:0000159;GO:0000159;GO:0000278;GO:0004722;GO:0004722;GO:0005829;GO:0006470;GO:0019888;GO:0019888;GO:0032502;GO:0043278;GO:0043278;GO:0043666;GO:0044877;GO:0048156;GO:0050790;GO:0051721;GO:0070262;	K04354	protein phosphatase 2, regulatory subunit B, alpha[Source:MGI Symbol;Acc:MGI:1919228]
MGP_C57BL6NJ_G0021963	14	71103730	71126880	-	1773	Itm2b	GO:0000139;GO:0001540;GO:0001540;GO:0005515;GO:0005524;GO:0005524;GO:0005576;GO:0005615;GO:0005615;GO:0005768;GO:0005794;GO:0005794;GO:0005794;GO:0005886;GO:0005886;GO:0005886;GO:0007399;GO:0010008;GO:0016020;GO:0016020;GO:0016021;GO:0030660;GO:0030660;GO:0031301;GO:0031301;GO:0042985;GO:0042985;GO:0042985;GO:0043231;GO:0070062;GO:0070062;GO:0097192;GO:0097192;	K18264	integral membrane protein 2B [Source:MGISymbol;Acc:MGI:1309517]
MGP_C57BL6NJ_G0019711	11	114000794	114292139	-	6610	Pitpnc1	GO:0005548;GO:0005622;GO:0005634;GO:0005737;GO:0005737;GO:0005737;GO:0006810;GO:0006869;GO:0007165;GO:0008289;GO:0008526;GO:0008526;GO:0008526;GO:0015914;GO:0035091;GO:0046488;	-	phosphatidylinositol transfer protein, cytoplasmic1 [Source:MGI Symbol;Acc:MGI:1919045]
MGP_C57BL6NJ_G0021924	14	67031704	67065600	+	8074	Gm21685	GO:0000139;GO:0000421;GO:0005794;GO:0016020;GO:0016021;GO:0016787;GO:0016787;GO:0017110;GO:0017110;GO:0017111;GO:0030173;GO:0031410;GO:0045134;GO:0045134;GO:0097637;	K12305	predicted gene, 21685 [Source:MGISymbol;Acc:MGI:5435040]
MGP_C57BL6NJ_G0019782	11	123143939	123159076	+	3069	Armc7	GO:0005634;GO:0005737;GO:0008150;GO:0016342;GO:0019903;GO:0045294;GO:0045296;	-	armadillo repeat containing 7 [Source:MGISymbol;Acc:MGI:2679719]
MGP_C57BL6NJ_G0031590	6	121241334	121263050	+	6986	Mkrn2	GO:0003674;GO:0003723;GO:0005622;GO:0005622;GO:0008150;GO:0008150;GO:0016567;GO:0016740;GO:0046872;GO:0046872;	K15687	makorin, ring finger protein, 2 [Source:MGISymbol;Acc:MGI:1914277]
MGP_C57BL6NJ_G0026714	2	118750924	118900445	+	4982	Aven	GO:0003674;GO:0005622;GO:0005622;GO:0006915;GO:0012505;GO:0016020;GO:0016020;GO:0043066;GO:0043066;	-	apoptosis, caspase activation inhibitor [Source:MGISymbol;Acc:MGI:1921518]
MGP_C57BL6NJ_G0026178	2	61596594	61631004	-	1354	Cd302	GO:0004888;GO:0005737;GO:0005887;GO:0005902;GO:0005938;GO:0005938;GO:0006909;GO:0007165;GO:0016020;GO:0016020;GO:0016021;GO:0030175;GO:0030175;GO:0030246;GO:0042995;	K06722	CD302 antigen [Source:MGI Symbol;Acc:MGI:1913455]"
MGP_C57BL6NJ_G0035508	9	74597595	74694400	+	15296	Rfx7	GO:0000978;GO:0003677;GO:0003700;GO:0005634;GO:0006355;GO:0006357;	-	regulatory factor X, 7 [Source:MGISymbol;Acc:MGI:2442675]
MGP_C57BL6NJ_G0017303	1	196074615	196117760	-	7196	-	-	-	-
MGP_C57BL6NJ_G0032858	7	80711924	80741232	+	3856	Klhl25	GO:0003674;GO:0005737;GO:0005737;GO:0006417;GO:0006446;GO:0006446;GO:0006446;GO:0006511;GO:0006511;GO:0006511;GO:0016567;GO:0016567;GO:0016567;GO:0031463;GO:0031463;GO:0031463;GO:0031463;GO:0042787;GO:0042787;	K10462	kelch-like 25 [Source:MGI Symbol;Acc:MGI:2668031]"
MGP_C57BL6NJ_G0022290	15	60853591	61090348	+	3281	Nsmce2	GO:0000722;GO:0000722;GO:0000724;GO:0000724;GO:0000724;GO:0000781;GO:0000781;GO:0004842;GO:0005634;GO:0005634;GO:0005694;GO:0006281;GO:0006310;GO:0006974;GO:0007049;GO:0008270;GO:0016567;GO:0016604;GO:0016605;GO:0016605;GO:0016740;GO:0016874;GO:0016925;GO:0019789;GO:0019789;GO:0019789;GO:0030915;GO:0030915;GO:0030915;GO:0034184;GO:0034184;GO:0045842;GO:0045842;GO:0046872;GO:0051301;GO:0090398;GO:…	-	NSE2/MMS21 homolog, SMC5-SMC6 complex SUMO ligase[Source:MGI Symbol;Acc:MGI:1915751]
MGP_C57BL6NJ_G0035602	9	91734952	91776530	-	12467	Syncrip	GO:0001649;GO:0003676;GO:0003723;GO:0003723;GO:0005634;GO:0005654;GO:0005681;GO:0005737;GO:0005737;GO:0005783;GO:0006397;GO:0008143;GO:0008380;GO:0016020;GO:0017148;GO:0030529;GO:0030529;GO:0043231;GO:0070934;GO:0070937;GO:0070937;GO:0071013;GO:0071204;GO:0071346;GO:0097452;GO:1990904;GO:1990904;GO:0005737;GO:0008143;GO:0071204;	K13160	synaptotagmin binding, cytoplasmic RNA interactingprotein [Source:MGI Symbol;Acc:MGI:1891690]
MGP_C57BL6NJ_G0024539	18	3916904	3941939	+	2257	Rab18	GO:0000166;GO:0001654;GO:0003924;GO:0003924;GO:0005525;GO:0005525;GO:0005622;GO:0005794;GO:0005886;GO:0006810;GO:0006886;GO:0007275;GO:0007420;GO:0009925;GO:0015031;GO:0016020;GO:0016324;GO:0019003;GO:0019003;GO:0032482;GO:0034389;GO:0034389;GO:0045202;GO:0051170;GO:0051170;GO:0070062;GO:0071782;GO:0071786;	K07910	RAB18, member RAS oncogene family [Source:MGISymbol;Acc:MGI:102790]
MGP_C57BL6NJ_G0026135	2	45367130	45507531	-	19901	Zeb2	GO:0000122;GO:0000122;GO:0000790;GO:0001205;GO:0001227;GO:0001755;GO:0001756;GO:0001843;GO:0003676;GO:0003677;GO:0003677;GO:0005634;GO:0005634;GO:0005634;GO:0005730;GO:0005829;GO:0006351;GO:0006355;GO:0006366;GO:0007417;GO:0021540;GO:0021766;GO:0021846;GO:0021957;GO:0030177;GO:0043507;GO:0043565;GO:0045636;GO:0045944;GO:0045944;GO:0046872;GO:0048023;GO:0048066;GO:0048598;GO:0048668;GO:0050772;GO:…	K09299	zinc finger E-box binding homeobox 2 [Source:MGISymbol;Acc:MGI:1344407]
MGP_C57BL6NJ_G0022301	15	66020075	66332488	-	7485	Asap1	GO:0001786;GO:0002102;GO:0002102;GO:0005096;GO:0005096;GO:0005096;GO:0005096;GO:0005515;GO:0005515;GO:0005546;GO:0005546;GO:0005547;GO:0005737;GO:0005829;GO:0005829;GO:0005829;GO:0005886;GO:0005886;GO:0016020;GO:0017124;GO:0030030;GO:0031253;GO:0031253;GO:0032266;GO:0042277;GO:0043197;GO:0043547;GO:0043547;GO:0045296;GO:0046872;GO:0060271;GO:0060271;GO:0060271;GO:0061000;GO:0071803;GO:0071803;GO:…	K12488	ArfGAP with SH3 domain, ankyrin repeat and PHdomain1 [Source:MGI Symbol;Acc:MGI:1342335]
MGP_C57BL6NJ_G0031611	6	122336471	122337564	-	1094	Olfr215	GO:0004871;GO:0004930;GO:0004930;GO:0004984;GO:0004984;GO:0004984;GO:0005886;GO:0007165;GO:0007186;GO:0007186;GO:0007186;GO:0007608;GO:0007608;GO:0016020;GO:0016021;GO:0016021;GO:0016021;GO:0050896;GO:0050911;	K04257	olfactory receptor 215 [Source:MGISymbol;Acc:MGI:3030049]
MGP_C57BL6NJ_G0016617	1	88328703	88683010	-	8080	Pid1	GO:0001933;GO:0005515;GO:0005737;GO:0005737;GO:0005737;GO:0005737;GO:0010628;GO:0042127;GO:0044320;GO:0044320;GO:0045944;GO:0046325;GO:0046325;GO:0046627;GO:0046627;GO:0051881;GO:0051881;GO:0051881;GO:0070346;GO:0070584;GO:0071345;GO:0071345;GO:0071354;GO:0071354;GO:0071356;GO:0071356;GO:0071398;GO:0071398;GO:0090298;GO:1903077;GO:2000045;GO:2000377;GO:2000377;GO:2000379;GO:2001170;GO:2001171;GO:…	-	phosphotyrosine interaction domain containing 1[Source:MGI Symbol;Acc:MGI:2138391]
MGP_C57BL6NJ_G0020849	13	37256013	37444021	+	13991	Rreb1	GO:0000122;GO:0000122;GO:0000977;GO:0000978;GO:0000979;GO:0001228;GO:0001650;GO:0003676;GO:0003677;GO:0003700;GO:0003700;GO:0005634;GO:0005634;GO:0006351;GO:0006355;GO:0006366;GO:0007165;GO:0007275;GO:0010634;GO:0016607;GO:0016607;GO:0033601;GO:0043565;GO:0044212;GO:0045892;GO:0045944;GO:0046872;GO:0070062;GO:1900026;GO:1903691;GO:2000394;GO:0000122;GO:0003700;GO:0045892;	-	ras responsive element binding protein 1[Source:MGI Symbol;Acc:MGI:2443664]
MGP_C57BL6NJ_G0024850	18	54820830	54916484	+	4587	Csnk1g3	GO:0000166;GO:0000287;GO:0004672;GO:0004674;GO:0004674;GO:0004674;GO:0004674;GO:0005524;GO:0005524;GO:0005524;GO:0005634;GO:0005737;GO:0005737;GO:0005886;GO:0006468;GO:0006468;GO:0006897;GO:0008360;GO:0016055;GO:0016055;GO:0016301;GO:0016310;GO:0016740;GO:0018105;GO:0018105;GO:0018107;GO:0042277;GO:0046777;GO:0051219;GO:0090263;	K08958	casein kinase 1, gamma 3 [Source:MGISymbol;Acc:MGI:1917675]
MGP_C57BL6NJ_G0017454	10	18595513	18942529	-	7232	Pde7b	GO:0004114;GO:0004115;GO:0006198;GO:0007165;GO:0008081;GO:0016787;GO:0046872;GO:0004115;	K18436	phosphodiesterase 7B [Source:MGISymbol;Acc:MGI:1352752]
MGP_C57BL6NJ_G0017366	1	208485161	208508627	+	7279	Cd34	GO:0001894;GO:0001894;GO:0001935;GO:0003094;GO:0005576;GO:0005576;GO:0005737;GO:0005737;GO:0005764;GO:0005764;GO:0005886;GO:0005886;GO:0005887;GO:0007155;GO:0007155;GO:0007160;GO:0008134;GO:0008217;GO:0008217;GO:0008283;GO:0009897;GO:0009897;GO:0009925;GO:0009925;GO:0009986;GO:0009986;GO:0009986;GO:0010629;GO:0016020;GO:0016020;GO:0016020;GO:0016020;GO:0016021;GO:0016324;GO:0016324;GO:0030097;GO:…	K06474	CD34 antigen [Source:MGI Symbol;Acc:MGI:88329]"
MGP_C57BL6NJ_G0034287	8	76086325	76626826	-	7979	Large	GO:0000139;GO:0003824;GO:0005515;GO:0005794;GO:0005794;GO:0006486;GO:0008152;GO:0009101;GO:0015020;GO:0015020;GO:0016020;GO:0016021;GO:0016740;GO:0016757;GO:0016757;GO:0016757;GO:0030145;GO:0030145;GO:0035269;GO:0035269;GO:0042285;GO:0042285;GO:0043231;GO:0043403;GO:0046716;GO:0046872;GO:0060538;	K09668	like-glycosyltransferase [Source:MGISymbol;Acc:MGI:1342270]
MGP_C57BL6NJ_G0016429	1	58926675	59126707	-	6788	Satb2	GO:0000118;GO:0000122;GO:0000790;GO:0000977;GO:0000978;GO:0001077;GO:0001227;GO:0001764;GO:0002076;GO:0003677;GO:0003677;GO:0003677;GO:0003682;GO:0005515;GO:0005515;GO:0005634;GO:0005634;GO:0005634;GO:0005654;GO:0005654;GO:0005667;GO:0006325;GO:0006338;GO:0006351;GO:0006355;GO:0006366;GO:0007275;GO:0009880;GO:0010468;GO:0016363;GO:0016569;GO:0021902;GO:0043565;GO:0043565;GO:0045944;GO:0045944;GO:…	-	special AT-rich sequence binding protein 2[Source:MGI Symbol;Acc:MGI:2679336]
MGP_C57BL6NJ_G0036163	X	33998648	34012460	+	331	-	-	-	-
MGP_C57BL6NJ_G0028496	4	17507540	17534830	+	2141	Slc7a13	GO:0003333;GO:0005887;GO:0006810;GO:0006865;GO:0015171;GO:0015179;GO:0015297;GO:0016020;GO:0016020;GO:0016021;GO:0022857;GO:0055085;GO:1902475;	K13870	solute carrier family 7, (cationic amino acidtransporter, y+ system) member 13 [Source:MGISymbol;Acc:MGI:1921337]
MGP_C57BL6NJ_G0022835	15	108613706	108720125	-	1611	-	-	-	-
MGP_C57BL6NJ_G0033002	7	103646856	103884762	+	6215	Gab2	GO:0007169;	K08091	growth factor receptor bound protein 2-associatedprotein 2 [Source:MGI Symbol;Acc:MGI:1333854]
MGP_C57BL6NJ_G0020467	12	109987773	109993943	+	621	4930408O17Rik	GO:0003674;GO:0005575;GO:0008150;	-	RIKEN cDNA 4930408O17 gene [Source:MGISymbol;Acc:MGI:1921178]
MGP_C57BL6NJ_G0027001	2	152557935	152604591	+	571	Banf2	GO:0003674;GO:0003677;GO:0005634;GO:0005634;GO:0005737;GO:0008150;	-	barrier to autointegration factor 2 [Source:MGISymbol;Acc:MGI:2684961]
MGP_C57BL6NJ_G0020282	12	83512690	83519185	-	5626	Ccdc177	GO:0003674;GO:0005575;GO:0008150;	-	coiled-coil domain containing 177 [Source:MGISymbol;Acc:MGI:2686414]
MGP_C57BL6NJ_G0033450	7	131351059	131716176	+	7640	Prkcb	GO:0000166;GO:0001666;GO:0002250;GO:0002376;GO:0003682;GO:0003682;GO:0004672;GO:0004674;GO:0004674;GO:0004674;GO:0004674;GO:0004697;GO:0004697;GO:0004697;GO:0005080;GO:0005246;GO:0005515;GO:0005515;GO:0005524;GO:0005524;GO:0005634;GO:0005634;GO:0005654;GO:0005737;GO:0005737;GO:0005813;GO:0005829;GO:0005886;GO:0006325;GO:0006351;GO:0006355;GO:0006357;GO:0006357;GO:0006468;GO:0006468;GO:0006816;GO:…	K19662	protein kinase C, beta [Source:MGISymbol;Acc:MGI:97596]
MGP_C57BL6NJ_G0028281	3	135017721	135049223	-	8763	Ap1ar	GO:0001920;GO:0005768;GO:0005768;GO:0005794;GO:0005829;GO:0019894;GO:0019894;GO:0030133;GO:0034315;GO:0034315;GO:0034613;GO:0035650;GO:0035650;GO:0035650;GO:0048203;GO:0048203;GO:0048203;GO:0071933;GO:1900025;GO:1900025;GO:2000146;GO:2000146;GO:0005768;GO:0034315;GO:0034613;GO:1900025;GO:2000146;	-	adaptor-related protein complex 1 associatedregulatory protein [Source:MGI Symbol;Acc:MGI:2384822]
MGP_C57BL6NJ_G0024119	17	39628629	39630065	-	1000	Olfr114	GO:0004871;GO:0004930;GO:0004930;GO:0004984;GO:0004984;GO:0004984;GO:0005549;GO:0005886;GO:0007165;GO:0007186;GO:0007186;GO:0007186;GO:0007186;GO:0007608;GO:0007608;GO:0007608;GO:0016020;GO:0016021;GO:0016021;GO:0016021;GO:0050896;GO:0050911;	K04257	olfactory receptor 114 [Source:MGISymbol;Acc:MGI:2177497]
MGP_C57BL6NJ_G0034287	8	76086325	76626826	-	7979	Large	GO:0000139;GO:0003824;GO:0005515;GO:0005794;GO:0005794;GO:0006486;GO:0008152;GO:0009101;GO:0015020;GO:0015020;GO:0016020;GO:0016021;GO:0016740;GO:0016757;GO:0016757;GO:0016757;GO:0030145;GO:0030145;GO:0035269;GO:0035269;GO:0042285;GO:0042285;GO:0043231;GO:0043403;GO:0046716;GO:0046872;GO:0060538;	K09668	like-glycosyltransferase [Source:MGISymbol;Acc:MGI:1342270]
MGP_C57BL6NJ_G0016210	1	3763176	4201077	+	6464	St18	GO:0000122;GO:0000977;GO:0000977;GO:0000978;GO:0001047;GO:0001078;GO:0001228;GO:0003677;GO:0003677;GO:0003700;GO:0005634;GO:0005634;GO:0005634;GO:0005634;GO:0006351;GO:0006355;GO:0006355;GO:0006366;GO:0008270;GO:0008285;GO:0032993;GO:0033209;GO:0045944;GO:0046872;GO:0070102;GO:0070498;GO:2001269;	-	suppression of tumorigenicity 18 [Source:MGISymbol;Acc:MGI:2446700]
MGP_C57BL6NJ_G0016986	1	161720327	161884914	+	7380	Fam129a	GO:0001933;GO:0001934;GO:0003674;GO:0003674;GO:0005737;GO:0005737;GO:0005829;GO:0005886;GO:0006417;GO:0016020;GO:0016020;GO:0034976;GO:0045727;GO:0070062;GO:0001933;GO:0001934;GO:0034976;GO:0045727;	-	family with sequence similarity 129, member A[Source:MGI Symbol;Acc:MGI:2137237]
MGP_C57BL6NJ_G0020565	12	122687025	122753740	+	4443	Vipr2	-	K04590	vasoactive intestinal peptide receptor 2[Source:MGI Symbol;Acc:MGI:107166]
MGP_C57BL6NJ_G0016967	1	153099507	153125733	-	9533	Trove2	GO:0002520;GO:0002520;GO:0003723;GO:0003723;GO:0003723;GO:0003723;GO:0003723;GO:0005634;GO:0005634;GO:0005654;GO:0005737;GO:0005737;GO:0005737;GO:0005829;GO:0007224;GO:0007224;GO:0009411;GO:0009411;GO:0030030;GO:0030529;GO:0030529;GO:0030529;GO:0030620;GO:0030620;GO:0034336;GO:0046872;GO:0060271;GO:0060271;GO:1990904;GO:1990904;GO:1990904;GO:1990904;	K11089	TROVE domain family, member 2 [Source:MGISymbol;Acc:MGI:106652]
MGP_C57BL6NJ_G0026261	2	76425820	76428699	-	2181	Atp5g3	GO:0000276;GO:0005739;GO:0005739;GO:0006810;GO:0006811;GO:0008289;GO:0015078;GO:0015986;GO:0015986;GO:0015991;GO:0015992;GO:0016020;GO:0016021;GO:0031966;GO:0033177;GO:0045263;GO:0045263;GO:0045263;GO:0046933;GO:0005739;	K02128	ATP synthase, H+ transporting, mitochondrial F0complex, subunit C3 (subunit 9) [Source:MGISymbol;Acc:MGI:2442035]
MGP_C57BL6NJ_G0022517	15	84595774	84781606	-	5910	Mkl1	GO:0000976;GO:0000976;GO:0001105;GO:0001764;GO:0001764;GO:0003700;GO:0003700;GO:0003713;GO:0003713;GO:0003713;GO:0003779;GO:0003779;GO:0003779;GO:0003785;GO:0003785;GO:0003785;GO:0005515;GO:0005515;GO:0005515;GO:0005634;GO:0005634;GO:0005634;GO:0005634;GO:0005654;GO:0005737;GO:0005737;GO:0005737;GO:0005737;GO:0005829;GO:0006351;GO:0006355;GO:0006357;GO:0006366;GO:0010735;GO:0010735;GO:0010735;GO:…	K22525	MKL (megakaryoblastic leukemia)/myocardin-like 1[Source:MGI Symbol;Acc:MGI:2384495]
