# Supplementary material for: LncRNA-mRNA Expression Profiles of Osteoclast After Conditional Knockout HIF-1α
Source: Front Genet. 2022 Jun 21;13:909095. doi: 10.3389/fgene.2022.909095 (PMC9253292; doi:10.3389/fgene.2022.909095)
Supplement: Supplementary file 8 [file Table10.XLSX]

## Sheet: Sheet1
Gene_ID	Length	Ctrl_1:read count	Ctrl_1:fpkm	Ctrl_2:read count	Ctrl_2:fpkm	Ctrl_3:read count	Ctrl_3:fpkm	Cko_1:read count	Cko_1:fpkm	Cko_2:read count	Cko_2:fpkm	Cko_3:read count	Cko_3:fpkm	Chromosome	Start Site	End Site	Direction	Length	Name	GO	KEGG	Description
MGP_C57BL6NJ_G0016197	6094	0	0	0	0	0	0	0	0	0	0	0	0	1	236101	739323	-	6094	Xkr4	-	-	X-linked Kx blood group related 4 [Source:MGISymbol;Acc:MGI:3528744]
MGP_C57BL6NJ_G0016198	9108	0	0	0	0	0	0	0	0	0	0	12	0.130972	1	1395482	1520558	-	9108	Rp1	GO:0001750;GO:0001750;GO:0001917;GO:0001917;GO:0004096;GO:0005622;GO:0005737;GO:0005856;GO:0005875;GO:0005929;GO:0005929;GO:0005930;GO:0005930;GO:0005930;GO:0007026;GO:0007601;GO:0007601;GO:0008017;GO:0008017;GO:0020037;GO:0030030;GO:0032391;GO:0032391;GO:0035082;GO:0035082;GO:0035556;GO:0035845;GO:0042461;GO:0042461;GO:0042461;GO:0042995;GO:0045494;GO:0046548;GO:0046549;GO:0046785;GO:0050896;GO:…	-	retinitis pigmentosa 1 (human) [Source:MGISymbol;Acc:MGI:1341105]
MGP_C57BL6NJ_G0016199	4772	0	0	0	0	0	0	0	0	0	0	0	0	1	1599613	1606036	-	4772	Sox17	GO:0000122;GO:0000122;GO:0000122;GO:0000981;GO:0000981;GO:0000981;GO:0001228;GO:0001228;GO:0001228;GO:0001525;GO:0001525;GO:0001525;GO:0001570;GO:0001570;GO:0001570;GO:0001706;GO:0001828;GO:0001828;GO:0001947;GO:0001947;GO:0001947;GO:0001947;GO:0003142;GO:0003142;GO:0003143;GO:0003143;GO:0003151;GO:0003151;GO:0003308;GO:0003308;GO:0003677;GO:0003677;GO:0003677;GO:0003700;GO:0003700;GO:0003705;GO:…	K04495	SRY (sex determining region Y)-box 17 [Source:MGISymbol;Acc:MGI:107543]
MGP_C57BL6NJ_G0016200	8487	214	2.04924	376	2.87987	519	2.81314	194	2.38717	204	2.53674	198	2.31917	1	1901332	1920220	-	8487	Mrpl15	GO:0000002;GO:0003723;GO:0003735;GO:0003735;GO:0003735;GO:0005739;GO:0005739;GO:0005762;GO:0005762;GO:0005762;GO:0005840;GO:0006412;GO:0006412;GO:0015934;GO:0030529;GO:1990830;GO:0005739;GO:1990830;	K02876	mitochondrial ribosomal protein L15 [Source:MGISymbol;Acc:MGI:1351639]
MGP_C57BL6NJ_G0016201	7017	479	5.54776	574	5.3174	296	1.94052	225	3.34863	218	3.27873	247	3.49918	1	1944939	1989568	+	7017	Lypla1	GO:0002084;GO:0002084;GO:0002084;GO:0004622;GO:0005737;GO:0005737;GO:0005739;GO:0005829;GO:0006629;GO:0006631;GO:0008474;GO:0008474;GO:0008474;GO:0016298;GO:0016787;GO:0016787;GO:0042997;GO:0052689;GO:0070062;GO:0002084;GO:0005739;GO:0005829;GO:0008474;GO:0042997;	-	lysophospholipase 1 [Source:MGISymbol;Acc:MGI:1344588]
MGP_C57BL6NJ_G0016202	825	0	0	0	0	0	0	0	0	0	0	0	0	1	1945043	2040954	+	825	Gm37988	-	-	predicted gene, 37988 [Source:MGISymbol;Acc:MGI:5611216]
MGP_C57BL6NJ_G0016203	852	563	53.7035	464	35.4011	216	11.6625	338	41.4299	432	53.5112	289	33.7193	1	2008441	2053249	+	852	Tcea1	GO:0003676;GO:0003677;GO:0005515;GO:0005634;GO:0005634;GO:0005634;GO:0005654;GO:0005669;GO:0005730;GO:0006351;GO:0006351;GO:0006355;GO:0006355;GO:0008270;GO:0030218;GO:0045893;GO:0045944;GO:0046872;	K03145	transcription elongation factor A (SII) 1[Source:MGI Symbol;Acc:MGI:1196624]
MGP_C57BL6NJ_G0016204	4254	8	0.152836	0	0	0	0	0	0	1	0.0248087	0	0	1	2066129	2233095	-	4254	Rgs20	GO:0005096;GO:0005634;GO:0005737;GO:0005737;GO:0005794;GO:0005802;GO:0005886;GO:0007186;GO:0009968;GO:0016020;GO:0031410;GO:0043547;	K16449	regulator of G-protein signaling 20 [Source:MGISymbol;Acc:MGI:1929866]
MGP_C57BL6NJ_G0016205	9746	1196	9.97329	1422	9.48445	6332	29.8877	683	7.31865	1096	11.8682	647	6.59931	1	2232828	2333419	+	9746	Atp6v1h	GO:0000221;GO:0000221;GO:0000221;GO:0005765;GO:0005765;GO:0006810;GO:0006811;GO:0006897;GO:0007035;GO:0015991;GO:0015991;GO:0015992;GO:0016820;GO:0046961;GO:0046961;GO:0046961;GO:0070062;	K02144	ATPase, H+ transporting, lysosomal V1 subunit H[Source:MGI Symbol;Acc:MGI:1914864]
MGP_C57BL6NJ_G0016206	9147	0	0	0	0	0	0	0	0	0	0	0	0	1	2778881	2796534	+	9147	Oprk1	GO:0004985;GO:0005887;GO:0007626;GO:0019233;GO:0046877;	K04214	opioid receptor, kappa 1 [Source:MGISymbol;Acc:MGI:97439]
MGP_C57BL6NJ_G0016207	3692	0	0	0	0	0	0	0	0	0	0	0	0	1	3132173	3135864	-	3692	Npbwr1	GO:0004871;GO:0004930;GO:0004930;GO:0004930;GO:0005886;GO:0005887;GO:0007165;GO:0007186;GO:0007186;GO:0007186;GO:0007187;GO:0007218;GO:0007268;GO:0008188;GO:0016020;GO:0016021;GO:0016021;GO:0019222;GO:0019222;GO:0042923;GO:0043005;	K05268	neuropeptides B/W receptor 1 [Source:MGISymbol;Acc:MGI:891989]
MGP_C57BL6NJ_G0016208	13599	2841	16.9784	2850	13.6231	402	1.35987	1440	11.0584	1712	13.2861	1473	10.7675	1	3450433	3531362	+	13599	Rb1cc1	GO:0000045;GO:0000045;GO:0000407;GO:0000422;GO:0001889;GO:0001934;GO:0001934;GO:0005515;GO:0005515;GO:0005515;GO:0005634;GO:0005634;GO:0005737;GO:0005737;GO:0005829;GO:0005829;GO:0006351;GO:0006355;GO:0006914;GO:0006914;GO:0007049;GO:0007507;GO:0019898;GO:0019901;GO:0019901;GO:0030242;GO:0031965;GO:0032947;GO:0034045;GO:0034045;GO:0034727;GO:0043066;GO:0045793;GO:0046330;GO:0061709;GO:0061723;GO:…	-	RB1-inducible coiled-coil 1 [Source:MGISymbol;Acc:MGI:1341850]
MGP_C57BL6NJ_G0016209	923	0	0	0	0	0	0	2	0.22629	0	0	0	0	1	3617958	3661240	+	923	Fam150a	GO:0005575;GO:0005576;GO:0010976;GO:0030298;GO:0030298;GO:0030971;GO:0030971;GO:0061098;GO:0070374;GO:0070378;	-	family with sequence similarity 150, member A[Source:MGI Symbol;Acc:MGI:3645495]
MGP_C57BL6NJ_G0016210	6464	893	11.2275	1044	10.4988	305	2.17058	786	12.6987	973	15.8859	935	14.3791	1	3763176	4201077	+	6464	St18	GO:0000122;GO:0000977;GO:0000977;GO:0000978;GO:0001047;GO:0001078;GO:0001228;GO:0003677;GO:0003677;GO:0003700;GO:0005634;GO:0005634;GO:0005634;GO:0005634;GO:0006351;GO:0006355;GO:0006355;GO:0006366;GO:0008270;GO:0008285;GO:0032993;GO:0033209;GO:0045944;GO:0046872;GO:0070102;GO:0070498;GO:2001269;	-	suppression of tumorigenicity 18 [Source:MGISymbol;Acc:MGI:2446700]
MGP_C57BL6NJ_G0016211	4490	1226	22.191	1588	22.9902	365	3.7396	913	21.2354	930	21.8594	782	17.3134	1	4439612	4545522	+	4490	Pcmtd1	GO:0004719;GO:0004719;GO:0005737;GO:0005737;GO:0006464;GO:0006479;GO:0008150;GO:0008168;GO:0016020;GO:0016740;GO:0032259;GO:0032259;	-	protein-L-isoaspartate (D-aspartate) O-methyltransferase domain containing 1 [Source:MGISymbol;Acc:MGI:2441773]
MGP_C57BL6NJ_G0016212	1391	11	0.642686	61	2.85063	143	4.72919	9	0.675697	5	0.379353	6	0.42879	1	4542846	4544950	+	1391	-	-	-	-
MGP_C57BL6NJ_G0016213	10908	18	0.13411	0	0	0	0	0	0	0	0	0	0	1	5822197	6828043	-	10908	Sntg1	GO:0005198;	-	syntrophin, gamma 1 [Source:MGISymbol;Acc:MGI:1918346]
MGP_C57BL6NJ_G0016214	655	0	0	0	0	0	0	0	0	0	0	0	0	1	6342559	6343213	+	655	-	-	-	-
MGP_C57BL6NJ_G0016215	2049	264	10.4712	81	2.5697	82	1.84098	216	11.009	173	8.91056	135	6.54957	1	7111625	7113779	+	2049	Rrs1	GO:0000027;GO:0000027;GO:0000055;GO:0000447;GO:0000794;GO:0001650;GO:0002244;GO:0002244;GO:0003723;GO:0005515;GO:0005634;GO:0005634;GO:0005634;GO:0005730;GO:0005730;GO:0005730;GO:0005730;GO:0005783;GO:0005783;GO:0007080;GO:0008097;GO:0008097;GO:0030687;GO:0042254;GO:0042254;GO:0042273;GO:0042273;GO:1901796;GO:1901796;GO:1902570;GO:1902570;	K14852	ribosome biogenesis regulator 1 [Source:MGISymbol;Acc:MGI:1929721]
MGP_C57BL6NJ_G0016216	3780	4	0.0860006	15	0.257952	165	2.00803	23	0.635437	20	0.558392	2	0.0525968	1	7114272	7145278	+	3780	Adhfe1	GO:0004022;GO:0005739;GO:0005739;GO:0005829;GO:0006539;GO:0006539;GO:0015993;GO:0015993;GO:0016491;GO:0016491;GO:0046872;GO:0047988;GO:0047988;GO:0055114;GO:0055114;GO:0055114;	K11173	alcohol dehydrogenase, iron containing, 1[Source:MGI Symbol;Acc:MGI:1923437]
MGP_C57BL6NJ_G0016217	3256	0	0	0	0	0	0	0	0	0	0	0	0	1	7169045	7197693	+	3256	3110035E14Rik	GO:0003674;GO:0005575;GO:0005634;GO:0005634;GO:0005886;GO:0005886;GO:0007399;GO:0008150;GO:0016020;GO:0022008;GO:0022008;GO:0030182;GO:0030182;	-	RIKEN cDNA 3110035E14 gene [Source:MGISymbol;Acc:MGI:1924232]
MGP_C57BL6NJ_G0016218	5396	133	2.00315	287	3.45739	15	0.127879	95	1.8386	96	1.87759	55	1.01324	1	7241122	7283146	-	5396	Mybl1	GO:0003677;GO:0006355;GO:0006366;	K09421	myeloblastosis oncogene-like 1 [Source:MGISymbol;Acc:MGI:99925]
MGP_C57BL6NJ_G0016219	9749	2288	19.0735	2666	17.7762	1043	4.92156	1988	21.2957	2594	28.0809	1848	18.8436	1	7302428	7331301	-	9749	Vcpip1	GO:0004843;GO:0016567;	K11861	valosin containing protein (p97)/p47 complexinteracting protein 1 [Source:MGI Symbol;Acc:MGI:1917925]
MGP_C57BL6NJ_G0016220	14214	839	4.7971	1019	4.66012	631	2.04217	808	5.93651	1114	8.27122	859	6.00755	1	7386857	7500544	+	14214	Sgk3	GO:0000166;GO:0001558;GO:0004672;GO:0004674;GO:0004674;GO:0004674;GO:0004674;GO:0005246;GO:0005524;GO:0005524;GO:0005768;GO:0005769;GO:0006468;GO:0015459;GO:0016301;GO:0016310;GO:0016740;GO:0017080;GO:0017081;GO:0018105;GO:0031410;GO:0031410;GO:0032411;GO:0035091;GO:0035556;GO:0042127;GO:0055037;GO:2001240;GO:0004674;GO:0031410;GO:2001240;	K13304	serum/glucocorticoid regulated kinase 3 [Source:MGISymbol;Acc:MGI:2182368]
MGP_C57BL6NJ_G0016221	5916	0	0	18	0.19778	2	0.0155518	0	0	3	0.0535173	1	0.0168032	1	7508331	7543510	+	5916	Mcmdc2	GO:0003674;GO:0003677;GO:0005524;GO:0005575;GO:0006270;GO:0006281;GO:0006974;GO:0007130;GO:0007146;GO:0007283;GO:0042140;GO:0048477;GO:0051321;GO:1990918;GO:0007130;GO:0007146;GO:0007283;GO:0042140;GO:0048477;GO:1990918;	-	minichromosome maintenance domain containing 2[Source:MGI Symbol;Acc:MGI:3045334]
MGP_C57BL6NJ_G0016222	4193	0	0	7	0.108521	6	0.0658271	3	0.0747193	0	0	0	0	1	7561588	7570507	-	4193	Tcf24	GO:0003674;GO:0005575;GO:0008150;GO:0046983;	-	transcription factor 24 [Source:MGISymbol;Acc:MGI:3780500]
MGP_C57BL6NJ_G0016223	1517	6	0.321439	0	0	0	0	0	0	0	0	0	0	1	7571199	7613519	-	1517	Ppp1r42	GO:0002177;GO:0003779;GO:0005515;GO:0005737;GO:0005813;GO:0005815;GO:0005856;GO:0010921;GO:0015630;GO:0015631;GO:0070840;GO:0002177;GO:0003779;GO:0005813;GO:0005815;GO:0010921;GO:0015630;GO:0015631;GO:0070840;	-	protein phosphatase 1, regulatory subunit 42[Source:MGI Symbol;Acc:MGI:1921138]
MGP_C57BL6NJ_G0016224	3766	352	7.59619	460	7.93992	1136	13.8764	307	8.51323	391	10.9571	294	7.76047	1	7628986	7642546	-	3766	Cops5	GO:0000338;GO:0000338;GO:0000785;GO:0003713;GO:0004222;GO:0004843;GO:0005515;GO:0005634;GO:0005634;GO:0005654;GO:0005667;GO:0005737;GO:0005737;GO:0005737;GO:0005829;GO:0005829;GO:0006355;GO:0006508;GO:0006508;GO:0008021;GO:0008021;GO:0008180;GO:0008180;GO:0008180;GO:0008180;GO:0008180;GO:0008233;GO:0008237;GO:0008237;GO:0008237;GO:0016579;GO:0016787;GO:0019784;GO:0019899;GO:0019899;GO:0030054;GO:…	K09613	COP9 signalosome subunit 5 [Source:MGISymbol;Acc:MGI:1349415]
MGP_C57BL6NJ_G0016225	17545	824	3.81687	1104	4.09029	69	0.180915	567	3.37494	743	4.46927	497	2.81594	1	7642365	7745448	+	17545	Cspp1	GO:0000922;GO:0005819;	-	centrosome and spindle pole associated protein 1[Source:MGI Symbol;Acc:MGI:2681832]
MGP_C57BL6NJ_G0016226	11015	2896	21.3672	3330	19.6516	1371	5.72573	2377	22.5362	2668	25.5624	2128	19.2047	1	7746251	7855590	-	11015	Arfgef1	GO:0000139;GO:0000139;GO:0005085;GO:0005085;GO:0005086;GO:0005086;GO:0005634;GO:0005654;GO:0005730;GO:0005730;GO:0005737;GO:0005794;GO:0005794;GO:0005802;GO:0005802;GO:0005802;GO:0005829;GO:0005829;GO:0006810;GO:0007030;GO:0007030;GO:0010256;GO:0010256;GO:0015031;GO:0016020;GO:0016192;GO:0016363;GO:0017022;GO:0030532;GO:0030532;GO:0030837;GO:0030837;GO:0031175;GO:0032012;GO:0034237;GO:0034237;GO:…	K18442	ADP-ribosylation factor guanine nucleotide-exchangefactor 1(brefeldin A-inhibited) [Source:MGISymbol;Acc:MGI:2442988]
MGP_C57BL6NJ_G0016227	6502	35	0.437476	41	0.409898	0	0	6	0.0963697	0	0	0	0	1	7949133	8375250	-	6502	Cpa6	GO:0004180;GO:0004180;GO:0004181;GO:0004181;GO:0005576;GO:0005578;GO:0005615;GO:0006508;GO:0006508;GO:0006508;GO:0008233;GO:0008237;GO:0008270;GO:0016787;GO:0046872;	-	carboxypeptidase A6 [Source:MGISymbol;Acc:MGI:3045348]
MGP_C57BL6NJ_G0016228	16370	0	0	1	0.00397091	0	0	0	0	7	0.0451284	1	0.00607257	1	8659664	8981505	+	16370	Prex2	GO:0005085;GO:0005085;GO:0005089;GO:0005096;GO:0005622;GO:0005737;GO:0005886;GO:0005886;GO:0005886;GO:0006469;GO:0007186;GO:0007186;GO:0008344;GO:0008344;GO:0014065;GO:0014065;GO:0016020;GO:0016021;GO:0030676;GO:0030676;GO:0030676;GO:0032007;GO:0035023;GO:0035556;GO:0043547;GO:0048813;GO:0048813;GO:0065009;	K17588	phosphatidylinositol-3,4,5-trisphosphate-dependentRac exchange factor 2 [Source:MGI Symbol;Acc:MGI:1923385]
MGP_C57BL6NJ_G0016229	9400	0	0	0	0	0	0	0	0	0	0	0	0	1	9102429	9705462	+	9400	A830018L16Rik	GO:0003674;GO:0005575;GO:0008150;	-	RIKEN cDNA A830018L16 gene [Source:MGISymbol;Acc:MGI:2444149]
MGP_C57BL6NJ_G0016230	11228	657	4.7555	669	3.87313	2	0.00819419	108	1.00452	20	0.187987	14	0.12395	1	10518255	10698221	+	11228	Sulf1	GO:0001502;GO:0001822;GO:0001937;GO:0001937;GO:0001937;GO:0002063;GO:0002063;GO:0003094;GO:0003094;GO:0003824;GO:0004065;GO:0004065;GO:0005509;GO:0005539;GO:0005615;GO:0005615;GO:0005615;GO:0005783;GO:0005783;GO:0005783;GO:0005783;GO:0005794;GO:0005794;GO:0005794;GO:0005795;GO:0005886;GO:0005886;GO:0006790;GO:0006915;GO:0007155;GO:0008152;GO:0008449;GO:0008449;GO:0008449;GO:0008484;GO:0009986;GO:…	K14607	sulfatase 1 [Source:MGI Symbol;Acc:MGI:2138563]"
MGP_C57BL6NJ_G0016231	8215	0	0	40	0.316513	18	0.100796	1	0.0127124	3	0.0385402	7	0.0847055	1	10709508	10849283	-	8215	Slco5a1	GO:0005215;GO:0005886;GO:0005887;GO:0006810;GO:0006811;GO:0015347;GO:0016020;GO:0016020;GO:0016021;GO:0043252;GO:0055085;	-	solute carrier organic anion transporter family,member 5A1 [Source:MGI Symbol;Acc:MGI:2443431]
MGP_C57BL6NJ_G0016232	2564	0	0	0	0	0	0	0	0	0	0	0	0	1	10987612	11001104	-	2564	Prdm14	GO:0000122;GO:0000122;GO:0000122;GO:0000902;GO:0000902;GO:0000977;GO:0000977;GO:0000977;GO:0001227;GO:0001708;GO:0001708;GO:0001827;GO:0001827;GO:0003676;GO:0003677;GO:0003723;GO:0003723;GO:0005515;GO:0005515;GO:0005634;GO:0005634;GO:0005634;GO:0005634;GO:0005654;GO:0006351;GO:0006355;GO:0007281;GO:0007281;GO:0007281;GO:0007566;GO:0007566;GO:0008168;GO:0009566;GO:0009566;GO:0010468;GO:0010468;GO:…	-	PR domain containing 14 [Source:MGISymbol;Acc:MGI:3588194]
MGP_C57BL6NJ_G0016233	15635	1427	7.41753	2155	8.95959	867	2.55094	1317	8.79679	1522	10.2735	1371	8.71687	1	11016348	11256688	-	15635	Ncoa2	GO:0000122;GO:0000978;GO:0001162;GO:0003682;GO:0003713;GO:0003713;GO:0003713;GO:0005102;GO:0005515;GO:0005515;GO:0005515;GO:0005634;GO:0005634;GO:0005634;GO:0005634;GO:0005654;GO:0005654;GO:0005737;GO:0005791;GO:0005794;GO:0005874;GO:0006351;GO:0006355;GO:0006355;GO:0006355;GO:0007623;GO:0008134;GO:0010468;GO:0010906;GO:0014069;GO:0016604;GO:0016922;GO:0016922;GO:0017162;GO:0019904;GO:0030165;GO:…	-	nuclear receptor coactivator 2 [Source:MGISymbol;Acc:MGI:1276533]
MGP_C57BL6NJ_G0016234	3162	2795	71.8379	3113	63.9965	3023	43.9799	1963	64.8328	1784	59.5434	1785	56.1174	1	11459828	11486465	-	3162	Tram1	GO:0003674;GO:0005783;GO:0005783;GO:0005789;GO:0005791;GO:0006616;GO:0006810;GO:0015031;GO:0016020;GO:0016021;GO:0016021;GO:0030176;GO:0030176;	K14010	translocating chain-associating membrane protein 1[Source:MGI Symbol;Acc:MGI:1919515]
MGP_C57BL6NJ_G0016235	4659	319	5.56457	608	8.483	380	3.75205	241	5.40208	208	4.71163	194	4.13933	1	11523288	11561766	-	4659	Lactb2	GO:0003723;GO:0003727;GO:0003727;GO:0003727;GO:0004518;GO:0004519;GO:0004521;GO:0004521;GO:0004521;GO:0005739;GO:0005739;GO:0005739;GO:0005759;GO:0005759;GO:0005759;GO:0008270;GO:0008270;GO:0016787;GO:0046872;GO:0090502;GO:0090502;	K16639	lactamase, beta 2 [Source:MGISymbol;Acc:MGI:2442551]
MGP_C57BL6NJ_G0016236	1926	0	0	0	0	0	0	0	0	0	0	1	0.0516137	1	11570293	11616955	+	1926	Xkr9	GO:0003674;GO:0008150;GO:0016020;GO:0016021;GO:0016021;	-	X-linked Kx blood group related 9 [Source:MGISymbol;Acc:MGI:2686466]
MGP_C57BL6NJ_G0016237	7808	991	10.315	817	6.80176	106	0.624517	711	9.50969	845	11.4214	597	7.60073	1	12081900	12236783	-	7808	Eya1	GO:0000132;GO:0000132;GO:0001656;GO:0001656;GO:0001657;GO:0001657;GO:0001658;GO:0001658;GO:0003151;GO:0003151;GO:0003723;GO:0003723;GO:0004721;GO:0004725;GO:0004725;GO:0004725;GO:0004725;GO:0004725;GO:0005515;GO:0005515;GO:0005634;GO:0005634;GO:0005634;GO:0005634;GO:0005654;GO:0005737;GO:0005737;GO:0005737;GO:0006281;GO:0006302;GO:0006302;GO:0006325;GO:0006351;GO:0006355;GO:0006470;GO:0006470;GO:…	K15616	EYA transcriptional coactivator and phosphatase 1[Source:MGI Symbol;Acc:MGI:109344]
MGP_C57BL6NJ_G0016238	2546	0	0	0	0	0	0	0	0	0	0	0	0	1	12727513	12730159	-	2546	Msc	GO:0000122;GO:0000122;GO:0000980;GO:0000980;GO:0001206;GO:0001206;GO:0003677;GO:0005634;GO:0005634;GO:0005634;GO:0005654;GO:0006351;GO:0006355;GO:0014707;GO:0014707;GO:0046983;GO:0060021;GO:0060021;GO:0060539;GO:0060539;GO:1990830;GO:1990830;	K09072	musculin [Source:MGI Symbol;Acc:MGI:1333884]"
MGP_C57BL6NJ_G0016239	4263	0	0	0	0	0	0	2	0.0489949	0	0	0	0	1	12864214	12911412	-	4263	Trpa1	GO:0005216;GO:0005216;GO:0005216;GO:0005245;GO:0005262;GO:0005262;GO:0005515;GO:0005886;GO:0005887;GO:0005887;GO:0006810;GO:0006811;GO:0006811;GO:0006816;GO:0006816;GO:0007166;GO:0007166;GO:0009409;GO:0009409;GO:0010033;GO:0010033;GO:0014070;GO:0014070;GO:0014832;GO:0015267;GO:0015267;GO:0015278;GO:0015278;GO:0016020;GO:0016020;GO:0016021;GO:0016021;GO:0016021;GO:0016324;GO:0019233;GO:0030424;GO:…	K04984	transient receptor potential cation channel,subfamily A, member 1 [Source:MGI Symbol;Acc:MGI:3522699]
MGP_C57BL6NJ_G0016240	15169	0	0	0	0	0	0	0	0	0	0	0	0	1	13310995	13770265	+	15169	Kcnb2	GO:0005216;GO:0005244;GO:0005249;GO:0005249;GO:0005251;GO:0005251;GO:0005251;GO:0005267;GO:0005886;GO:0005886;GO:0006810;GO:0006811;GO:0006811;GO:0006813;GO:0006813;GO:0006813;GO:0008076;GO:0008076;GO:0008076;GO:0008076;GO:0016020;GO:0016020;GO:0016021;GO:0016021;GO:0030425;GO:0030425;GO:0030425;GO:0032809;GO:0032809;GO:0034765;GO:0042995;GO:0043025;GO:0043025;GO:0043204;GO:0044325;GO:0046982;GO:…	K04886	potassium voltage gated channel, Shab-relatedsubfamily, member 2 [Source:MGI Symbol;Acc:MGI:99632]
MGP_C57BL6NJ_G0016241	4635	254	4.45366	303	4.24944	17	0.168724	237	5.33992	260	5.92004	237	5.08299	1	13855687	13896679	+	4635	Terf1	GO:0000723;GO:0000723;GO:0000723;GO:0000781;GO:0000781;GO:0000783;GO:0000783;GO:0000783;GO:0000784;GO:0000784;GO:0000784;GO:0000784;GO:0000784;GO:0001650;GO:0003677;GO:0003677;GO:0003691;GO:0003691;GO:0003691;GO:0003720;GO:0005515;GO:0005515;GO:0005515;GO:0005634;GO:0005634;GO:0005634;GO:0005634;GO:0005654;GO:0005694;GO:0005730;GO:0005737;GO:0005819;GO:0005819;GO:0005856;GO:0007004;GO:0007049;GO:…	K11110	telomeric repeat binding factor 1 [Source:MGISymbol;Acc:MGI:109634]
MGP_C57BL6NJ_G0016242	2748	0	0	0	0	0	0	0	0	0	0	0	0	1	13906194	13942671	-	2748	Sbspon	GO:0003674;GO:0005044;GO:0005576;GO:0005578;GO:0006898;GO:0006955;GO:0008150;GO:0030247;GO:0031012;	-	somatomedin B and thrombospondin, type 1 domaincontaining [Source:MGI Symbol;Acc:MGI:2684952]
MGP_C57BL6NJ_G0016243	2055	0	0	0	0	0	0	0	0	0	0	0	0	1	14142254	14176192	-	2055	4930444P10Rik	GO:0003674;GO:0005575;GO:0008150;	-	RIKEN cDNA 4930444P10 gene [Source:MGISymbol;Acc:MGI:1923049]
MGP_C57BL6NJ_G0016244	2673	2094	63.6665	2512	61.0885	4344	74.76	1146	44.7736	1089	42.9962	1204	44.7763	1	14190968	14196285	-	2673	Rpl7	GO:0005844;GO:0022625;	K02937	ribosomal protein L7 [Source:MGISymbol;Acc:MGI:98073]
MGP_C57BL6NJ_G0016245	4160	61	1.19171	136	2.12512	112	1.23852	14	0.351456	28	0.710339	23	0.549611	1	14197921	14225878	+	4160	Rdh10	GO:0001656;GO:0001656;GO:0001701;GO:0001701;GO:0002138;GO:0002138;GO:0002138;GO:0004745;GO:0004745;GO:0005737;GO:0005783;GO:0005789;GO:0005811;GO:0007601;GO:0008406;GO:0008406;GO:0009887;GO:0009887;GO:0014032;GO:0014032;GO:0016020;GO:0016020;GO:0016020;GO:0016021;GO:0016021;GO:0016491;GO:0016491;GO:0031076;GO:0031076;GO:0031090;GO:0035115;GO:0035115;GO:0042572;GO:0042572;GO:0042574;GO:0043231;GO:…	K11151	retinol dehydrogenase 10 (all-trans) [Source:MGISymbol;Acc:MGI:1924238]
MGP_C57BL6NJ_G0016246	6391	476	6.05301	444	4.51599	335	2.41132	171	2.79424	173	2.85679	101	1.57099	1	14319461	14637603	-	6391	Stau2	GO:0003723;GO:0003723;GO:0003725;GO:0005634;GO:0005634;GO:0005730;GO:0005737;GO:0005737;GO:0005783;GO:0005874;GO:0006810;GO:0010468;GO:0010494;GO:0016020;GO:0019894;GO:0030424;GO:0030425;GO:0030544;GO:0031965;GO:0032839;GO:0032956;GO:0043022;GO:0043025;GO:0043198;GO:0048592;GO:0051019;GO:0051489;GO:0051965;GO:0061003;GO:0098964;GO:1900454;GO:1990124;	K17597	staufen (RNA binding protein) homolog 2(Drosophila) [Source:MGI Symbol;Acc:MGI:1352508]
MGP_C57BL6NJ_G0016247	4930	495	8.16003	438	5.77519	782	7.29689	244	5.16868	255	5.45876	203	4.09327	1	14655072	14745580	-	4930	Ube2w	-	-	ubiquitin-conjugating enzyme E2W (putative)[Source:MGI Symbol;Acc:MGI:1914049]
MGP_C57BL6NJ_G0016248	3026	387	10.3938	498	10.6979	201	3.05566	256	8.83502	287	10.0095	330	10.8409	1	14768985	14784294	-	3026	Tceb1	GO:0004842;GO:0005515;GO:0005515;GO:0005634;GO:0006351;GO:0006355;GO:0006511;GO:0006511;GO:0016567;GO:0030891;GO:0032968;GO:0042787;GO:0044877;GO:0070449;GO:0070449;	K03872	transcription elongation factor B (SIII),polypeptide 1 [Source:MGI Symbol;Acc:MGI:1915173]
MGP_C57BL6NJ_G0016249	1820	265	11.8334	344	12.2864	384	9.70595	142	8.14804	126	7.30634	127	6.9367	1	14794300	14808682	+	1820	Tmem70	GO:0003674;GO:0003674;GO:0005654;GO:0005739;GO:0005739;GO:0005743;GO:0016020;GO:0016021;GO:0032592;GO:0032592;GO:0033615;GO:0033615;	K17966	transmembrane protein 70 [Source:MGISymbol;Acc:MGI:1915068]
MGP_C57BL6NJ_G0016250	1021	432	34.3868	403	25.6577	208	9.37164	436	44.5961	323	33.387	631	61.4362	1	14819679	14843528	+	1021	Ly96	GO:0031663;GO:0031666;GO:0032760;GO:0034142;GO:0046696;GO:0071222;	K05400	lymphocyte antigen 96 [Source:MGISymbol;Acc:MGI:1341909]
MGP_C57BL6NJ_G0016251	4958	62	1.01629	76	0.996428	0	0	6	0.126381	4	0.085144	2	0.0401	1	15148191	15290298	-	4958	Jph1	GO:0005634;GO:0005654;GO:0005783;GO:0005783;GO:0005789;GO:0005789;GO:0005886;GO:0005886;GO:0007517;GO:0008307;GO:0008307;GO:0014701;GO:0015278;GO:0016020;GO:0016021;GO:0016529;GO:0016529;GO:0016529;GO:0030018;GO:0030314;GO:0030314;GO:0030314;GO:0033017;GO:0051209;GO:0005783;GO:0005789;GO:0005886;GO:0007517;GO:0008307;GO:0014701;GO:0016529;GO:0030018;GO:0030314;	-	junctophilin 1 [Source:MGI Symbol;Acc:MGI:1891495]"
MGP_C57BL6NJ_G0016252	7730	7	0.0735956	30	0.252279	0	0	0	0	17	0.232097	7	0.0900201	1	15338897	15359833	+	7730	Gdap1	GO:0000266;GO:0000266;GO:0000266;GO:0004364;GO:0005634;GO:0005737;GO:0005737;GO:0005739;GO:0005739;GO:0005739;GO:0005741;GO:0005829;GO:0006626;GO:0006626;GO:0006626;GO:0006749;GO:0007005;GO:0008053;GO:0008053;GO:0016020;GO:0016020;GO:0016021;GO:0031307;GO:0031307;GO:0031307;GO:0032526;GO:0032526;	K22077	ganglioside-induced differentiation-associated-protein 1 [Source:MGI Symbol;Acc:MGI:1338002]
MGP_C57BL6NJ_G0016253	6909	105	1.23512	89	0.837363	0	0	7	0.105808	2	0.0305503	0	0	1	15837768	15868047	+	6909	Pi15	GO:0005576;	-	peptidase inhibitor 15 [Source:MGISymbol;Acc:MGI:1934659]
MGP_C57BL6NJ_G0016254	4501	0	0	0	0	0	0	0	0	0	0	0	0	1	15970112	16009395	+	4501	Crispld1	GO:0003674;GO:0005576;GO:0005576;GO:0005615;GO:0060325;GO:0070062;	-	cysteine-rich secretory protein LCCL domaincontaining 1 [Source:MGI Symbol;Acc:MGI:1934666]
MGP_C57BL6NJ_G0016255	2737	0	0	0	0	0	0	0	0	0	0	0	0	1	16387158	16416624	-	2737	Crisp4	GO:0005246;GO:0007339;GO:0060046;	K19919	cysteine-rich secretory protein 4 [Source:MGISymbol;Acc:MGI:1925331]
MGP_C57BL6NJ_G0016256	258	0	0	0	0	0	0	0	0	0	0	0	0	1	16514067	16515037	-	258	Defb18	GO:0003674;GO:0005575;GO:0005576;GO:0005576;GO:0006952;GO:0008150;GO:0042742;GO:0045087;	-	defensin beta 18 [Source:MGISymbol;Acc:MGI:3648148]
MGP_C57BL6NJ_G0016257	610	0	0	0	0	0	0	0	0	0	0	0	0	1	16530320	16544964	-	610	Defb41	GO:0003674;GO:0005576;GO:0005576;GO:0006952;GO:0042742;GO:0045087;	-	defensin beta 41 [Source:MGISymbol;Acc:MGI:1924923]
MGP_C57BL6NJ_G0016258	1954	0	0	0	0	0	0	0	0	0	0	0	0	1	17480103	17544314	+	1954	Tfap2d	GO:0000977;GO:0000977;GO:0000977;GO:0000981;GO:0000981;GO:0000981;GO:0003677;GO:0003700;GO:0005515;GO:0005515;GO:0005634;GO:0005634;GO:0005634;GO:0005667;GO:0005667;GO:0006351;GO:0006355;GO:0006355;GO:0006357;GO:0042127;GO:0043524;GO:0043524;GO:0045893;GO:0045893;GO:0045944;GO:0045944;GO:0061379;GO:0061379;	K09178	transcription factor AP-2, delta [Source:MGISymbol;Acc:MGI:2153466]
MGP_C57BL6NJ_G0016259	6409	0	0	0	0	0	0	0	0	0	0	0	0	1	17591223	17623342	+	6409	Tfap2b	GO:0000122;GO:0000122;GO:0000977;GO:0000978;GO:0000978;GO:0000978;GO:0000979;GO:0000979;GO:0000979;GO:0000981;GO:0000981;GO:0000983;GO:0000983;GO:0001077;GO:0001077;GO:0001105;GO:0001105;GO:0001106;GO:0001106;GO:0001158;GO:0001822;GO:0001822;GO:0003091;GO:0003091;GO:0003677;GO:0003682;GO:0003700;GO:0003700;GO:0003700;GO:0003700;GO:0003713;GO:0003713;GO:0003713;GO:0003714;GO:0003714;GO:0003714;GO:…	K09176	transcription factor AP-2 beta [Source:MGISymbol;Acc:MGI:104672]
MGP_C57BL6NJ_G0016260	14310	0	0	0	0	0	0	0	0	0	0	0	0	1	18495092	19096464	-	14310	Pkhd1	GO:0001822;GO:0001822;GO:0005515;GO:0005515;GO:0005737;GO:0005813;GO:0005929;GO:0005929;GO:0006874;GO:0008284;GO:0010824;GO:0010824;GO:0016020;GO:0016021;GO:0016324;GO:0032006;GO:0032088;GO:0036064;GO:0043066;GO:0048471;GO:0051898;GO:0060271;GO:0060271;GO:0070062;GO:0070372;GO:0072686;	K19865	polycystic kidney and hepatic disease 1 [Source:MGISymbol;Acc:MGI:2155808]
MGP_C57BL6NJ_G0016261	1171	0	0	0	0	0	0	0	0	0	0	0	0	1	19213761	19217351	+	1171	Il17a	GO:0005125;GO:0005125;GO:0005576;GO:0005576;GO:0005615;GO:0005615;GO:0005615;GO:0005737;GO:0006954;GO:0009897;GO:0009897;GO:0010469;GO:0010940;GO:0032747;GO:0045672;GO:0045944;GO:0045944;GO:0050832;GO:0050832;GO:0071347;GO:0071347;GO:0071385;GO:0072537;GO:0097530;GO:0097530;GO:1900017;GO:1900017;GO:2000778;GO:2000778;	K05489	interleukin 17A [Source:MGI Symbol;Acc:MGI:107364]"
MGP_C57BL6NJ_G0016262	1445	0	0	0	0	0	0	0	0	0	0	2	0.137589	1	19268380	19281776	-	1445	Il17f	GO:0005125;GO:0005125;GO:0005125;GO:0005126;GO:0005126;GO:0005576;GO:0005576;GO:0005615;GO:0005615;GO:0005615;GO:0006954;GO:0010469;GO:0016525;GO:0017015;GO:0019955;GO:0042089;GO:0042109;GO:0042803;GO:0045076;GO:0045408;GO:0045414;GO:0045423;GO:0045944;GO:0045944;GO:0051216;GO:1900017;GO:1900017;GO:2000778;GO:2000778;	K05494	interleukin 17F [Source:MGISymbol;Acc:MGI:2676631]
MGP_C57BL6NJ_G0016263	3752	449	9.72561	662	11.4692	579	7.09895	777	21.6269	654	18.3957	693	18.3608	1	19295246	19312590	-	3752	Mcm3	GO:0000166;GO:0000784;GO:0003677;GO:0003677;GO:0004386;GO:0005524;GO:0005524;GO:0005634;GO:0005634;GO:0005634;GO:0005654;GO:0005737;GO:0005737;GO:0005813;GO:0006260;GO:0006260;GO:0006270;GO:0007049;GO:0016020;GO:0016787;GO:0042555;GO:0042555;GO:0042555;GO:0048471;	K02541	minichromosome maintenance complex component 3[Source:MGI Symbol;Acc:MGI:101845]
MGP_C57BL6NJ_G0016264	5488	54	0.799674	60	0.710683	43	0.36044	14	0.26641	24	0.461528	6	0.108682	1	19389255	19437153	+	5488	Paqr8	GO:0003707;GO:0005496;GO:0005496;GO:0005794;GO:0005886;GO:0005886;GO:0005886;GO:0007275;GO:0008289;GO:0016020;GO:0016021;GO:0016021;GO:0030154;GO:0038023;GO:0043401;GO:0048477;GO:0048545;	-	progestin and adipoQ receptor family member VIII[Source:MGI Symbol;Acc:MGI:1921479]
MGP_C57BL6NJ_G0016265	2208	10	0.368073	0	0	8	0.166674	1	0.0472974	0	0	5	0.225108	1	19449075	19487195	+	2208	Efhc1	-	K23029	EF-hand domain (C-terminal) containing 1[Source:MGI Symbol;Acc:MGI:1919127]
MGP_C57BL6NJ_G0016266	6654	605	7.38935	655	6.39878	349	2.4128	275	4.31605	309	4.90091	391	5.84137	1	19492653	19578323	-	6654	Tram2	GO:0005515;GO:0005791;GO:0006616;GO:0006810;GO:0015031;GO:0016020;GO:0016021;GO:0016021;GO:0032964;GO:0045048;GO:0045048;	-	translocating chain-associating membrane protein 2[Source:MGI Symbol;Acc:MGI:1924817]
MGP_C57BL6NJ_G0016267	1351	45	2.70701	18	0.866076	80	2.72404	13	1.0049	11	0.859287	9	0.662229	1	19738660	19753234	+	1351	Tmem14a	GO:0003674;GO:0005739;GO:0005783;GO:0005789;GO:0005789;GO:0016020;GO:0016020;GO:0016021;GO:0031966;GO:0031966;GO:0043066;GO:0043066;GO:1901029;GO:1901029;	-	transmembrane protein 14A [Source:MGISymbol;Acc:MGI:1922962]
MGP_C57BL6NJ_G0016268	4392	709	13.1195	760	11.2484	742	7.77177	450	10.7001	381	9.15511	474	10.7284	1	19765704	19791779	+	4392	Gsta3	GO:0001657;GO:0001657;GO:0004364;GO:0004364;GO:0004364;GO:0004364;GO:0005737;GO:0005829;GO:0006749;GO:0008152;GO:0016740;GO:0046223;GO:0046223;GO:0070062;	K00799	glutathione S-transferase, alpha 3 [Source:MGISymbol;Acc:MGI:95856]
MGP_C57BL6NJ_G0016269	2176	0	0	0	0	0	0	0	0	0	0	0	0	1	19907716	19945801	+	2176	Khdc1b	GO:0003723;GO:0003723;GO:0003723;GO:0003723;GO:0005515;GO:0005737;GO:0005737;GO:0006919;GO:0006919;GO:0042802;GO:0042802;	-	KH domain containing 1B [Source:MGISymbol;Acc:MGI:2138477]
MGP_C57BL6NJ_G0016270	2065	0	0	0	0	0	0	0	0	0	0	0	0	1	19907718	19913112	+	2065	-	-	-	-
MGP_C57BL6NJ_G0016271	2013	0	0	0	0	0	0	0	0	0	0	0	0	1	19907770	19913112	+	2013	-	-	-	-
MGP_C57BL6NJ_G0016272	7699	57	0.601692	34	0.287067	7	0.0418256	18	0.24416	14	0.191909	3	0.0387354	1	19990969	20618514	-	7699	Kcnq5	GO:0005216;GO:0005244;GO:0005249;GO:0005249;GO:0005249;GO:0005251;GO:0005267;GO:0005516;GO:0005886;GO:0005887;GO:0005887;GO:0006810;GO:0006811;GO:0006811;GO:0006813;GO:0006813;GO:0006813;GO:0008076;GO:0008076;GO:0008076;GO:0008076;GO:0016020;GO:0016020;GO:0016021;GO:0016021;GO:0030118;GO:0030118;GO:0034765;GO:0034765;GO:0055085;GO:0071805;GO:0071805;GO:0071805;GO:0071805;	K04930	potassium voltage-gated channel, subfamily Q,member 5 [Source:MGI Symbol;Acc:MGI:1924937]
MGP_C57BL6NJ_G0016273	7340	0	0	1	0.0088561	0	0	0	0	0	0	0	0	1	20963297	21509988	-	7340	-	-	-	-
MGP_C57BL6NJ_G0016274	1781	0	0	0	0	0	0	0	0	0	0	0	0	1	21823511	21825291	-	1781	4933415F23Rik	GO:0004865;GO:0005575;GO:0005737;GO:0032515;GO:0035304;GO:0042325;GO:0045087;GO:0045087;GO:0045087;	-	RIKEN cDNA 4933415F23 gene [Source:MGISymbol;Acc:MGI:1914005]
MGP_C57BL6NJ_G0016276	2338	0	0	0	0	0	0	0	0	0	0	0	0	1	22547772	22641185	+	2338	B3gat2	GO:0000139;GO:0000139;GO:0005794;GO:0005975;GO:0006486;GO:0015018;GO:0015018;GO:0015018;GO:0015018;GO:0016020;GO:0016020;GO:0016021;GO:0016051;GO:0016740;GO:0030204;GO:0046872;GO:0050650;	-	beta-1,3-glucuronyltransferase 2(glucuronosyltransferase S) [Source:MGISymbol;Acc:MGI:2389490]
MGP_C57BL6NJ_G0016277	3581	2234	50.7005	1679	30.4779	1071	13.7583	1646	48.0023	1306	38.4893	1599	44.3879	1	22640479	22714501	-	3581	Smap1	GO:0005096;GO:0005737;GO:0030276;GO:0045648;GO:2000369;	K12486	small ArfGAP 1 [Source:MGI Symbol;Acc:MGI:2138261]"
MGP_C57BL6NJ_G0016278	874	32	2.97558	28	2.0825	55	2.89487	6	0.716929	0	0	10	1.13739	1	22811495	22821212	-	874	Sdhaf4	GO:0003407;GO:0005739;GO:0005739;GO:0005739;GO:0005759;GO:0008177;GO:0008177;GO:0034553;GO:0034553;GO:0034553;GO:0034553;GO:0045087;GO:0045087;GO:0045333;GO:0045333;GO:0045333;GO:0097032;GO:0097032;	-	succinate dehydrogenase complex assembly factor 4[Source:MGI Symbol;Acc:MGI:1915252]
MGP_C57BL6NJ_G0016279	7773	308	3.22029	349	2.91861	78	0.46162	130	1.74659	126	1.71073	112	1.43235	1	22826649	22914170	-	7773	Fam135a	GO:0005575;GO:0044255;GO:0052689;	-	family with sequence similarity 135, member A[Source:MGI Symbol;Acc:MGI:1915437]
MGP_C57BL6NJ_G0016280	5068	0	0	0	0	0	0	0	0	0	0	0	0	1	23002070	23082213	+	5068	Col9a1	GO:0005581;	K08131	collagen, type IX, alpha 1 [Source:MGISymbol;Acc:MGI:88465]
MGP_C57BL6NJ_G0016281	6880	27	0.31894	26	0.245654	16	0.106982	56	0.850033	57	0.874354	64	0.924725	1	23091223	23448780	-	6880	Col19a1	GO:0007519;GO:0030198;	-	collagen, type XIX, alpha 1 [Source:MGISymbol;Acc:MGI:1095415]
MGP_C57BL6NJ_G0016282	2256	1522	54.8288	1461	42.0969	3173	64.7007	1456	67.3998	1095	51.2243	1260	55.5204	1	23551320	23661631	+	2256	Lmbrd1	GO:0005158;GO:0005764;GO:0005764;GO:0005765;GO:0005886;GO:0006810;GO:0016020;GO:0016020;GO:0016021;GO:0031419;GO:0038016;GO:0045334;GO:0046325;GO:0046627;GO:0051898;GO:0005158;GO:0005764;GO:0005886;GO:0038016;GO:0045334;GO:0046325;GO:0046627;GO:0051898;	-	LMBR1 domain containing 1 [Source:MGISymbol;Acc:MGI:1915671]
MGP_C57BL6NJ_G0016283	18583	0	0	14	0.0489724	0	0	0	0	0	0	0	0	1	23985124	24815525	-	18583	Adgrb3	GO:0004871;GO:0004888;GO:0004930;GO:0004930;GO:0004930;GO:0005096;GO:0005515;GO:0005515;GO:0005622;GO:0005886;GO:0005886;GO:0005887;GO:0007165;GO:0007166;GO:0007186;GO:0007186;GO:0007189;GO:0007520;GO:0007520;GO:0016020;GO:0016020;GO:0016021;GO:0016021;GO:0016322;GO:0016322;GO:0016525;GO:0043083;GO:0043083;GO:0043547;GO:0048814;GO:0051965;GO:0061743;GO:0098794;GO:0098794;GO:0099558;GO:0005096;GO:…	-	adhesion G protein-coupled receptor B3 [Source:MGISymbol;Acc:MGI:2441837]
MGP_C57BL6NJ_G0016284	4318	0	0	0	0	0	0	3	0.0725563	0	0	0	0	1	25736567	25748250	-	4318	4931408C20Rik	GO:0003674;GO:0005575;GO:0008150;GO:0016020;GO:0016021;	-	RIKEN cDNA 4931408C20 gene [Source:MGISymbol;Acc:MGI:3588222]
MGP_C57BL6NJ_G0016285	2887	0	0	0	0	0	0	0	0	0	0	0	0	1	28064297	28068428	-	2887	Gm597	GO:0003674;GO:0005575;GO:0008150;GO:0016020;GO:0016021;	-	predicted gene 597 [Source:MGISymbol;Acc:MGI:2685443]
MGP_C57BL6NJ_G0016286	14190	4354	24.9367	4417	20.2341	784	2.54163	3125	22.9987	3575	26.5885	3239	22.6908	1	30346017	30421673	-	14190	Phf3	GO:0003674;GO:0005575;GO:0006351;GO:0008150;GO:0046872;	-	PHD finger protein 3 [Source:MGISymbol;Acc:MGI:2446126]
MGP_C57BL6NJ_G0016288	1516	0	0	2	0.085757	0	0	0	0	0	0	7	0.459007	1	30700155	30801977	-	1516	4931428L18Rik	GO:0003674;GO:0005575;GO:0008150;	-	RIKEN cDNA 4931428L18 gene [Source:MGISymbol;Acc:MGI:1918238]
MGP_C57BL6NJ_G0016289	1937	0	0	0	0	0	0	0	0	0	0	0	0	1	30746365	30781629	+	1937	Lgsn	GO:0003824;GO:0004356;GO:0005515;GO:0005886;GO:0005886;GO:0006542;GO:0006807;GO:0016020;	-	lengsin, lens protein with glutamine synthetasedomain [Source:MGI Symbol;Acc:MGI:2672844]
MGP_C57BL6NJ_G0016290	1451	0	0	0	0	0	0	0	0	0	0	0	0	1	30802131	30803581	+	1451	Pih1d3	GO:0003341;GO:0005515;GO:0005737;GO:0005737;GO:0005737;GO:0030317;GO:0030317;GO:0030317;GO:0051087;GO:0051087;GO:0070286;GO:0070286;GO:0070286;	-	PIH1 domain containing 3 [Source:MGISymbol;Acc:MGI:1921958]
MGP_C57BL6NJ_G0016291	10291	8	0.063178	0	0	0	0	0	0	0	0	0	0	1	31875783	32415678	+	10291	Khdrbs2	GO:0003676;GO:0003723;GO:0003723;GO:0005070;GO:0005515;GO:0005634;GO:0005634;GO:0006351;GO:0006355;GO:0006397;GO:0008143;GO:0008143;GO:0008266;GO:0008266;GO:0009967;GO:0017124;GO:0017124;GO:0017124;GO:0042169;GO:0042169;GO:0042802;GO:0046982;GO:0046982;GO:0048024;GO:0048024;	K17843	KH domain containing, RNA binding, signaltransduction associated 2 [Source:MGISymbol;Acc:MGI:2159649]
MGP_C57BL6NJ_G0016292	5941	288	3.93973	260	2.84481	224	1.73447	204	3.58597	328	5.8266	255	4.26679	1	33275099	33511629	-	5941	Prim2	GO:0003677;GO:0003697;GO:0003887;GO:0003896;GO:0003896;GO:0003899;GO:0005658;GO:0006260;GO:0006269;GO:0006269;GO:0016740;GO:0016779;GO:0016779;GO:0046872;GO:0051536;GO:0051539;GO:0071897;	K02685	DNA primase, p58 subunit [Source:MGISymbol;Acc:MGI:97758]
MGP_C57BL6NJ_G0016293	8285	326	3.19785	292	2.29102	103	0.571904	86	1.08403	102	1.2993	154	1.84778	1	33565507	33589346	+	8285	Rab23	-	K06234	RAB23, member RAS oncogene family [Source:MGISymbol;Acc:MGI:99833]
MGP_C57BL6NJ_G0016294	3059	752	19.9789	776	16.49	94	1.4136	140	4.77953	39	1.34551	80	2.59975	1	33592201	33605708	-	3059	Bag2	GO:0000774;GO:0000774;GO:0000774;GO:0005575;GO:0005874;GO:0005874;GO:0006457;GO:0010954;GO:0019538;GO:0030424;GO:0030424;GO:0030425;GO:0030425;GO:0031072;GO:0031072;GO:0031397;GO:0031397;GO:0031397;GO:0031625;GO:0031625;GO:0032091;GO:0042802;GO:0044325;GO:0048156;GO:0048156;GO:0050790;GO:0050821;GO:0051087;GO:0051087;GO:0101031;GO:1901588;GO:1901588;GO:1901800;GO:1901800;GO:1904667;	K09556	BCL2-associated athanogene 2 [Source:MGISymbol;Acc:MGI:1891254]
MGP_C57BL6NJ_G0016295	15839	2108	10.8162	2101	8.62258	363	1.05428	1000	6.59339	1198	7.98233	941	5.90585	1	33609458	33662472	-	15839	Zfp451	GO:0001106;GO:0001106;GO:0003676;GO:0003677;GO:0003714;GO:0003714;GO:0005634;GO:0005634;GO:0005654;GO:0006351;GO:0006355;GO:0010468;GO:0016605;GO:0016740;GO:0016874;GO:0016925;GO:0016925;GO:0030512;GO:0030512;GO:0046872;GO:0060633;GO:0060633;GO:0061665;GO:0061665;GO:2000616;GO:2000616;	-	zinc finger protein 451 [Source:MGISymbol;Acc:MGI:2137896]
MGP_C57BL6NJ_G0016296	3396	62	1.48374	70	1.33989	41	0.555385	34	1.04556	16	0.497225	17	0.497625	1	33703221	33758863	-	3396	Bend6	GO:0000122;GO:0001106;GO:0001106;GO:0003682;GO:0003714;GO:0003714;GO:0005634;GO:0005634;GO:0006351;GO:0006355;GO:0007399;GO:0045666;GO:0045666;GO:0045746;GO:0045746;GO:0045746;GO:1903507;GO:0001106;GO:0003682;GO:0003714;GO:0005634;GO:0045666;GO:0045746;	-	BEN domain containing 6 [Source:MGISymbol;Acc:MGI:2444572]
MGP_C57BL6NJ_G0016297	38860	9281	19.41	11528	19.2837	1708	2.02192	3721	9.99985	4853	13.1798	2951	7.54896	1	33759297	34174359	+	38860	Dst	GO:0003779;GO:0005198;GO:0005509;GO:0005515;GO:0005515;GO:0005515;GO:0005634;GO:0005635;GO:0005737;GO:0005737;GO:0005783;GO:0005789;GO:0005856;GO:0005856;GO:0005874;GO:0005882;GO:0005886;GO:0005925;GO:0005938;GO:0007155;GO:0007409;GO:0008017;GO:0008017;GO:0008017;GO:0008090;GO:0008090;GO:0008092;GO:0014069;GO:0015629;GO:0015630;GO:0016020;GO:0016020;GO:0016021;GO:0030018;GO:0030054;GO:0030056;GO:…	K10382	dystonin [Source:MGI Symbol;Acc:MGI:104627]"
MGP_C57BL6NJ_G0016298	2514	199	6.43311	351	9.07571	117	2.14091	262	10.8836	109	4.57575	300	11.8625	1	34315343	34318236	-	2514	Ccdc115	GO:0005764;GO:0005764;GO:0005764;GO:0005768;GO:0005783;GO:0005783;GO:0005793;GO:0005793;GO:0006879;GO:0006879;GO:0007042;GO:0007042;GO:0016020;GO:0016471;GO:0016471;GO:0030137;GO:0030137;GO:0031410;GO:0036295;GO:0036295;GO:0042406;GO:0051082;GO:1905146;GO:1905146;	-	coiled-coil domain containing 115 [Source:MGISymbol;Acc:MGI:1916918]
MGP_C57BL6NJ_G0016299	8553	826	7.84865	1419	10.7846	2460	13.2311	568	6.93532	573	7.07029	689	8.00796	1	34318415	34329887	+	8553	Imp4	GO:0001650;GO:0003723;GO:0005634;GO:0005730;GO:0005730;GO:0005730;GO:0005730;GO:0006364;GO:0006364;GO:0006364;GO:0030515;GO:0030519;GO:0030529;GO:0030684;GO:0032040;GO:0034457;GO:0034457;GO:0042134;GO:0042254;	K14561	IMP4, U3 small nucleolar ribonucleoprotein[Source:MGI Symbol;Acc:MGI:106572]
MGP_C57BL6NJ_G0016300	6457	166	2.08935	279	2.80874	1185	8.4424	121	1.957	109	1.78154	84	1.29321	1	34340196	34362142	+	6457	Ptpn18	GO:0004726;GO:0005634;GO:0005737;	K18024	protein tyrosine phosphatase, non-receptor type 18[Source:MGI Symbol;Acc:MGI:108410]
MGP_C57BL6NJ_G0016301	1333	0	0	0	0	0	0	0	0	1	0.0791718	0	0	1	34389006	34394451	+	1333	Prss39	GO:0001669;GO:0004252;GO:0004252;GO:0005576;GO:0005615;GO:0006508;GO:0006508;GO:0031410;	-	protease, serine 39 [Source:MGISymbol;Acc:MGI:1270856]
MGP_C57BL6NJ_G0016302	1040	0	0	0	0	0	0	0	0	0	0	0	0	1	34444162	34454241	+	1040	Cfc1	GO:0001889;GO:0001889;GO:0001947;GO:0001947;GO:0003007;GO:0003007;GO:0005102;GO:0005576;GO:0005576;GO:0005886;GO:0005886;GO:0007275;GO:0007368;GO:0007368;GO:0007368;GO:0007369;GO:0007492;GO:0007492;GO:0007507;GO:0009791;GO:0009791;GO:0009952;GO:0009952;GO:0009952;GO:0009986;GO:0016020;GO:0030509;GO:0030509;GO:0030509;GO:0031225;GO:0038092;GO:0038092;GO:0038092;GO:0038100;GO:0038100;GO:0048536;GO:…	-	cripto, FRL-1, cryptic family 1 [Source:MGISymbol;Acc:MGI:109448]
MGP_C57BL6NJ_G0016303	2105	0	0	0	0	0	0	0	0	0	0	0	0	1	34453896	34473510	-	2105	Prss40	GO:0001669;GO:0004252;GO:0004252;GO:0005576;GO:0005615;GO:0006508;GO:0006508;GO:0006508;GO:0008233;GO:0008236;GO:0016787;GO:0031410;	-	protease, serine 40 [Source:MGISymbol;Acc:MGI:1270857]
MGP_C57BL6NJ_G0016304	4392	0	0	0	0	0	0	0	0	0	0	3	0.0679016	1	34495309	34507189	+	4392	Amer3	GO:0005546;GO:0005886;GO:0005886;GO:0008013;GO:0008289;GO:0016020;GO:0016055;GO:0048856;GO:0060828;	-	APC membrane recruitment 3 [Source:MGISymbol;Acc:MGI:3026939]
MGP_C57BL6NJ_G0016305	9561	13	0.110503	100	0.679885	89	0.428218	21	0.229378	64	0.706444	49	0.509464	1	34602396	34750490	+	9561	-	-	K05769	-
MGP_C57BL6NJ_G0016306	5219	2585	40.2538	3246	40.4297	3624	31.9433	1904	38.0992	1778	35.9538	2235	42.5707	1	34750400	34782459	-	5219	Fam168b	GO:0003674;GO:0005737;GO:0005886;GO:0008150;GO:0016020;GO:0016021;GO:0030424;GO:0042995;GO:0048471;GO:0070062;	-	family with sequence similarity 168, member B[Source:MGI Symbol;Acc:MGI:2448487]
MGP_C57BL6NJ_G0016307	7987	2336	23.7696	2890	23.5208	9293	53.5242	1882	24.6078	1831	24.1939	2178	27.1079	1	34789370	34821300	+	7987	Plekhb2	GO:0005547;GO:0005768;GO:0016020;GO:0016021;GO:0045595;GO:0055038;	-	pleckstrin homology domain containing, family B(evectins) member 2 [Source:MGI Symbol;Acc:MGI:2385825]
MGP_C57BL6NJ_G0016308	5387	612	9.2329	1371	16.5436	1378	11.7674	431	8.35539	537	10.5203	570	10.5184	1	36139091	36183032	+	5387	Hs6st1	GO:0001525;GO:0001525;GO:0008146;GO:0015012;GO:0015012;GO:0015015;GO:0015015;GO:0015015;GO:0016020;GO:0016021;GO:0016021;GO:0016740;GO:0017095;GO:0017095;GO:0017095;GO:0048286;GO:0048286;GO:0048666;GO:0048666;GO:0060716;GO:0060716;	K02514	heparan sulfate 6-O-sulfotransferase 1 [Source:MGISymbol;Acc:MGI:1354958]
MGP_C57BL6NJ_G0016309	12801	3261	20.7033	4121	20.9265	3260	11.7153	1948	15.8921	1984	16.3568	2133	16.5641	1	36224100	36334266	-	12801	Uggt1	GO:0003980;GO:0003980;GO:0003980;GO:0003980;GO:0005515;GO:0005783;GO:0005783;GO:0005783;GO:0005788;GO:0005788;GO:0005793;GO:0005793;GO:0006486;GO:0006486;GO:0016740;GO:0016757;GO:0018279;GO:0030968;GO:0032991;GO:0043234;GO:0051082;GO:0051082;GO:0051082;GO:0051084;GO:0070062;GO:0071712;GO:0097359;	K11718	UDP-glucose glycoprotein glucosyltransferase 1[Source:MGI Symbol;Acc:MGI:2443162]
MGP_C57BL6NJ_G0016310	3217	557	14.0714	889	17.9634	2637	37.7083	756	24.5418	792	25.9821	1013	31.3025	1	36359115	36368927	-	3217	Neurl3	GO:0005575;GO:0016567;GO:0016567;GO:0016567;GO:0016740;GO:0046872;GO:0061630;GO:0061630;	K15689	neuralized E3 ubiquitin protein ligase 3[Source:MGI Symbol;Acc:MGI:2429944]
MGP_C57BL6NJ_G0016311	12540	37	0.239794	129	0.668699	99	0.363175	138	1.14926	98	0.824763	119	0.943344	1	36408469	36425844	+	12540	Arid5a	GO:0000122;GO:0002062;GO:0002376;GO:0003677;GO:0003677;GO:0003682;GO:0003714;GO:0003723;GO:0005515;GO:0005634;GO:0005634;GO:0005634;GO:0005654;GO:0005667;GO:0005730;GO:0006351;GO:0006355;GO:0006357;GO:0008134;GO:0030331;GO:0035066;GO:0035613;GO:0043565;GO:0044212;GO:0045087;GO:0045944;GO:0046965;GO:0046966;GO:0050681;GO:0071222;GO:0071391;GO:1902715;GO:1904469;GO:1905078;GO:2000318;GO:2000556;GO:…	-	AT rich interactive domain 5A (MRF1-like)[Source:MGI Symbol;Acc:MGI:2443039]
MGP_C57BL6NJ_G0016312	6742	600	7.23263	870	8.38821	1232	8.40621	369	5.71576	425	6.65275	345	5.08688	1	36437476	36485182	-	6742	Kansl3	GO:0000123;GO:0000123;GO:0005634;GO:0005634;GO:0005634;GO:0005654;GO:0005730;GO:0006325;GO:0016569;GO:0043231;GO:0043981;GO:0043981;GO:0043981;GO:0043982;GO:0043982;GO:0043982;GO:0043984;GO:0043984;GO:0043984;GO:0043995;GO:0043995;GO:0043996;GO:0043996;GO:0044545;GO:0046972;GO:0046972;	K16719	KAT8 regulatory NSL complex subunit 3 [Source:MGISymbol;Acc:MGI:1918055]
MGP_C57BL6NJ_G0016313	6356	0	0	0	0	0	0	0	0	0	0	0	0	1	36487946	36540629	+	6356	Fer1l5	GO:0003674;GO:0005575;GO:0005886;GO:0007520;GO:0008150;GO:0016020;GO:0016021;GO:0016021;	K22126	fer-1-like 5 (C. elegans) [Source:MGISymbol;Acc:MGI:3616091]
MGP_C57BL6NJ_G0016314	7359	295	3.25789	480	4.23995	817	5.10718	240	3.40588	246	3.52791	220	2.97184	1	36538390	36565407	-	7359	Lman2l	GO:0000139;GO:0000139;GO:0005537;GO:0005783;GO:0005789;GO:0005789;GO:0005789;GO:0005793;GO:0005794;GO:0005794;GO:0006888;GO:0007029;GO:0007030;GO:0015031;GO:0015031;GO:0016020;GO:0016020;GO:0016021;GO:0030134;GO:0030246;GO:0046872;	-	lectin, mannose-binding 2-like [Source:MGISymbol;Acc:MGI:2443010]
MGP_C57BL6NJ_G0016315	4788	169	2.86857	267	3.6249	253	2.43077	199	4.34046	151	3.32831	128	2.65752	1	36594719	36631797	+	4788	Cnnm4	GO:0005886;GO:0006810;GO:0006811;GO:0007601;GO:0010960;GO:0010960;GO:0015081;GO:0015081;GO:0015095;GO:0015095;GO:0015693;GO:0015693;GO:0016020;GO:0016021;GO:0016323;GO:0016323;GO:0030425;GO:0031214;GO:0032991;GO:0035725;GO:0043025;GO:0043234;GO:0050896;GO:0055065;GO:0070166;GO:0070166;GO:1903830;	K16302	cyclin M4 [Source:MGI Symbol;Acc:MGI:2151060]"
MGP_C57BL6NJ_G0016316	6420	210	2.65838	319	3.22994	781	5.59621	192	3.12322	123	2.02195	109	1.68777	1	36636558	36652891	+	6420	Cnnm3	GO:0003674;GO:0005886;GO:0006810;GO:0006811;GO:0008150;GO:0016020;GO:0016020;GO:0016021;	K16302	cyclin M3 [Source:MGI Symbol;Acc:MGI:2151055]"
MGP_C57BL6NJ_G0016318	504	14	2.25752	3	0.386927	50	4.56371	8	1.65766	0	0	6	1.18343	1	36664119	36673395	-	504	Ankrd39	GO:0003674;GO:0005575;GO:0008150;	-	ankyrin repeat domain 39 [Source:MGISymbol;Acc:MGI:1914816]
MGP_C57BL6NJ_G0016319	4593	50	0.884722	93	1.31621	312	3.1249	6	0.136424	44	1.01101	27	0.58437	1	36674849	36684559	-	4593	Sema4c	GO:0001755;GO:0001843;GO:0005515;GO:0005515;GO:0005515;GO:0005615;GO:0005615;GO:0005886;GO:0005887;GO:0007275;GO:0007399;GO:0014069;GO:0016020;GO:0016021;GO:0021535;GO:0021549;GO:0030054;GO:0030154;GO:0030215;GO:0030335;GO:0030672;GO:0031410;GO:0032874;GO:0032874;GO:0038191;GO:0042692;GO:0042692;GO:0045202;GO:0045211;GO:0045499;GO:0048843;GO:0050919;GO:0071526;GO:0071526;GO:0001843;GO:0014069;GO:…	K06521	sema domain, immunoglobulin domain (Ig),transmembrane domain (TM) and short cytoplasmic domain,(semaphorin) 4C [Source:MGI Symbol;Acc:MGI:109252]
MGP_C57BL6NJ_G0016320	3190	0	0	0	0	0	0	0	0	0	0	1	0.0311624	1	36689684	36819468	-	3190	Fam178b	-	-	family with sequence similarity 178, member B[Source:MGI Symbol;Acc:MGI:3026913]
MGP_C57BL6NJ_G0016321	1552	345	18.066	544	22.7848	459	13.605	330	22.2054	258	17.544	337	21.5853	1	36827769	36829966	+	1552	Cox5b	GO:0003674;GO:0004129;GO:0005575;GO:0005740;GO:0008150;GO:0022900;GO:1902600;	K02265	cytochrome c oxidase subunit Vb [Source:MGISymbol;Acc:MGI:88475]
MGP_C57BL6NJ_G0016322	4274	776	14.7557	1581	24.0456	3933	42.3319	335	8.18553	394	9.72887	387	9.00114	1	36834943	36853047	-	4274	Actr1b	GO:0000166;GO:0003674;GO:0005524;GO:0005737;GO:0005737;GO:0005813;GO:0005815;GO:0005856;GO:0005869;GO:0008150;GO:0015630;GO:0016020;GO:0070062;	K16575	ARP1 actin-related protein 1B, centractin beta[Source:MGI Symbol;Acc:MGI:1917446]
MGP_C57BL6NJ_G0016323	2992	0	0	5	0.108629	2	0.0307501	27	0.942407	8	0.282182	27	0.897063	1	36909783	36936765	+	2992	Zap70	GO:0000166;GO:0001772;GO:0001772;GO:0001784;GO:0002250;GO:0002376;GO:0004672;GO:0004672;GO:0004672;GO:0004713;GO:0004713;GO:0004713;GO:0004713;GO:0004715;GO:0004715;GO:0004715;GO:0005102;GO:0005515;GO:0005515;GO:0005515;GO:0005524;GO:0005524;GO:0005524;GO:0005524;GO:0005737;GO:0005737;GO:0005737;GO:0005829;GO:0005829;GO:0005886;GO:0005886;GO:0005886;GO:0005911;GO:0005911;GO:0006468;GO:0006468;GO:…	K07360	zeta-chain (TCR) associated protein kinase[Source:MGI Symbol;Acc:MGI:99613]
MGP_C57BL6NJ_G0016324	9405	4011	34.6599	4601	31.8004	1805	8.8287	3497	38.8305	3147	35.3133	3406	36.0004	1	36945788	37102706	-	9405	Tmem131	GO:0003674;GO:0016020;GO:0016020;GO:0016021;	-	transmembrane protein 131 [Source:MGISymbol;Acc:MGI:1927110]
MGP_C57BL6NJ_G0016325	5473	0	0	0	0	0	0	1	0.0190814	0	0	1	0.0181633	1	37194551	37379016	+	5473	Vwa3b	GO:0003674;GO:0005575;GO:0008150;	-	von Willebrand factor A domain containing 3B[Source:MGI Symbol;Acc:MGI:1918103]
MGP_C57BL6NJ_G0016326	3955	0	0	0	0	0	0	0	0	0	0	0	0	1	37406268	37461348	+	3955	Cnga3	GO:0000166;GO:0001750;GO:0005216;GO:0005221;GO:0005222;GO:0005223;GO:0005223;GO:0005249;GO:0005515;GO:0005737;GO:0005886;GO:0005887;GO:0006810;GO:0006811;GO:0006811;GO:0006812;GO:0007601;GO:0008022;GO:0016020;GO:0016020;GO:0016021;GO:0030425;GO:0030553;GO:0030553;GO:0030553;GO:0032026;GO:0034220;GO:0034220;GO:0034765;GO:0042391;GO:0042622;GO:0043025;GO:0043194;GO:0043204;GO:0046549;GO:0050896;GO:…	-	cyclic nucleotide gated channel alpha 3 [Source:MGISymbol;Acc:MGI:1341818]
MGP_C57BL6NJ_G0016327	10381	587	4.5955	767	4.80281	1220	5.40628	427	4.29561	589	5.98793	541	5.18059	1	37498132	37612163	+	10381	Inpp4a	-	K01109	inositol polyphosphate-4-phosphatase, type I[Source:MGI Symbol;Acc:MGI:1931123]
MGP_C57BL6NJ_G0016328	5220	1122	17.4685	1403	17.4713	3212	28.3063	1231	24.6277	1237	25.0092	1213	23.1	1	37619853	37632825	-	5220	Coa5	GO:0003674;GO:0005739;GO:0005739;GO:0033617;	K18178	cytochrome C oxidase assembly factor 5 [Source:MGISymbol;Acc:MGI:1923428]
MGP_C57BL6NJ_G0016329	1579	174	8.95572	138	5.68114	892	25.9873	130	8.598	83	5.54749	79	4.97354	1	37632861	37641039	+	1579	Unc50	GO:0000139;GO:0000139;GO:0003723;GO:0003723;GO:0005634;GO:0005637;GO:0005637;GO:0005794;GO:0005794;GO:0006810;GO:0006810;GO:0007166;GO:0015031;GO:0016020;GO:0016021;GO:0030173;GO:0005794;	-	unc-50 homolog (C. elegans) [Source:MGISymbol;Acc:MGI:1914637]
MGP_C57BL6NJ_G0016330	8469	274	2.62937	349	2.67875	183	0.994025	278	3.42807	312	3.88797	233	2.73492	1	37645631	37754991	-	8469	Mgat4a	GO:0000139;GO:0005576;GO:0005794;GO:0005975;GO:0006486;GO:0006487;GO:0008375;GO:0008454;GO:0016020;GO:0016020;GO:0016021;GO:0016740;GO:0016757;GO:0016757;GO:0016758;GO:0046872;GO:0070062;GO:0006487;GO:0008375;GO:0016757;	K00738	mannoside acetylglucosaminyltransferase 4,isoenzyme A [Source:MGI Symbol;Acc:MGI:2662992]
MGP_C57BL6NJ_G0016331	5012	0	0	60	0.778178	226	2.07432	13	0.270875	18	0.37902	28	0.555351	1	37833431	37945119	-	5012	2010300C02Rik	GO:0003674;GO:0005575;GO:0008150;	-	RIKEN cDNA 2010300C02 gene [Source:MGISymbol;Acc:MGI:1919347]
MGP_C57BL6NJ_G0016332	10529	122	0.941686	246	1.51875	63	0.275253	146	1.44811	224	2.24523	112	1.05743	1	37984637	38099121	-	10529	Tsga10	GO:0005198;GO:0005515;GO:0005634;GO:0005737;GO:0005737;GO:0005737;GO:0007283;GO:0016020;GO:0030031;GO:0030031;GO:0031514;GO:0031514;GO:0031965;GO:0043005;GO:0043005;	-	testis specific 10 [Source:MGISymbol;Acc:MGI:2685063]
MGP_C57BL6NJ_G0016333	2051	40	1.58499	31	0.982505	91	2.04105	22	1.12019	9	0.463103	9	0.436212	1	38105613	38110103	+	2051	Lipt1	GO:0005739;GO:0005739;GO:0005739;GO:0006464;GO:0009249;GO:0009249;GO:0016740;GO:0016746;GO:0016979;GO:0005739;	-	lipoyltransferase 1 [Source:MGISymbol;Acc:MGI:3645211]
MGP_C57BL6NJ_G0016334	2770	145	4.25424	159	3.73127	56	0.930008	198	7.46486	184	7.01034	183	6.56738	1	38108676	38124279	-	2770	Mitd1	GO:0000281;GO:0000920;GO:0005768;GO:0006810;GO:0007049;GO:0016020;GO:0019898;GO:0019904;GO:0030496;GO:0030496;GO:0031902;GO:0032091;GO:0035091;GO:0042803;GO:0043231;GO:0051301;GO:0070062;	-	MIT, microtubule interacting and transport, domaincontaining 1 [Source:MGI Symbol;Acc:MGI:1916278]
MGP_C57BL6NJ_G0016335	3226	182	4.58501	202	4.07029	705	10.0532	155	5.01769	146	4.77627	159	4.89952	1	38124345	38134512	+	3226	Mrpl30	GO:0003674;GO:0003735;GO:0005739;GO:0005739;GO:0005739;GO:0005761;GO:0005762;GO:0005762;GO:0005840;GO:0006412;GO:0008150;GO:0015934;GO:0030529;	K02907	mitochondrial ribosomal protein L30 [Source:MGISymbol;Acc:MGI:1333820]
MGP_C57BL6NJ_G0016336	2564	0	0	0	0	0	0	0	0	0	0	0	0	1	38143340	38153745	-	2564	Lyg2	GO:0003796;GO:0003796;GO:0005576;GO:0005576;GO:0008152;GO:0009253;GO:0016787;GO:0016798;GO:0016998;GO:0042742;GO:0050830;	-	lysozyme G-like 2 [Source:MGISymbol;Acc:MGI:2685622]
MGP_C57BL6NJ_G0016337	888	0	0	0	0	0	0	0	0	0	0	0	0	1	38186322	38197337	-	888	Lyg1	-	-	lysozyme G-like 1 [Source:MGISymbol;Acc:MGI:1916791]
MGP_C57BL6NJ_G0016338	9102	973	8.68779	1137	8.12012	1069	5.4028	734	8.42162	761	8.82366	734	8.01641	1	38232210	38245223	-	9102	Txndc9	GO:0005634;GO:0005634;GO:0005634;GO:0005737;GO:0005737;GO:0005737;GO:0005813;GO:0005813;GO:0005815;GO:0005829;GO:0005856;GO:0008479;GO:0008616;GO:0030496;GO:0030496;GO:0030496;GO:0045296;GO:0045454;	-	thioredoxin domain containing 9 [Source:MGISymbol;Acc:MGI:2138153]
MGP_C57BL6NJ_G0016339	9753	8833	73.6044	7627	50.834	789	3.72149	7364	78.8519	7313	79.1331	6851	69.8291	1	38245340	38309523	+	9753	Eif5b	GO:0000166;GO:0003723;GO:0003743;GO:0003743;GO:0003743;GO:0003924;GO:0005525;GO:0005525;GO:0005737;GO:0005737;GO:0006412;GO:0006413;GO:0006446;GO:0016787;GO:0046872;	K03243	eukaryotic translation initiation factor 5B[Source:MGI Symbol;Acc:MGI:2441772]
MGP_C57BL6NJ_G0016340	6465	382	4.80207	458	4.60506	210	1.49427	275	4.44223	288	4.70137	271	4.16698	1	38306729	38386702	-	6465	Rev1	GO:0003677;GO:0003684;GO:0005515;GO:0005634;GO:0006281;GO:0006281;GO:0006974;GO:0009411;GO:0016740;GO:0016779;GO:0016779;GO:0017125;GO:0042276;GO:0042276;GO:0046872;GO:0071897;GO:0017125;GO:0042276;	K03515	REV1, DNA directed polymerase [Source:MGISymbol;Acc:MGI:1929074]
MGP_C57BL6NJ_G0016341	6654	66	0.806111	74	0.722916	12	0.0829615	26	0.408063	28	0.444095	42	0.627462	1	38436160	38947418	-	6654	Aff3	-	K15195	AF4/FMR2 family, member 3 [Source:MGISymbol;Acc:MGI:106927]
MGP_C57BL6NJ_G0016342	7209	0	0	0	0	0	0	0	0	0	0	0	0	1	39080977	39123508	-	7209	Lonrf2	GO:0000209;GO:0005622;GO:0031624;GO:0032436;GO:0061630;	-	LON peptidase N-terminal domain and ring finger 2[Source:MGI Symbol;Acc:MGI:1920209]
MGP_C57BL6NJ_G0016343	11964	7	0.0475505	9	0.0488996	3	0.0115351	9	0.0785602	10	0.0882113	9	0.0747803	1	39154920	39194298	-	11964	Chst10	GO:0000139;GO:0005794;GO:0005975;GO:0008146;GO:0016020;GO:0016021;GO:0016021;GO:0016051;GO:0016740;	-	carbohydrate sulfotransferase 10 [Source:MGISymbol;Acc:MGI:2138283]
MGP_C57BL6NJ_G0016344	1001	0	0	0	0	0	0	0	0	0	0	0	0	1	39242356	39253477	+	1001	Nms	GO:0001664;GO:0001664;GO:0005576;GO:0007218;GO:0007218;GO:0007218;GO:0045475;GO:0045475;	-	neuromedin S [Source:MGI Symbol;Acc:MGI:3583618]"
MGP_C57BL6NJ_G0016345	1362	554	33.0572	607	28.9701	212	7.16039	365	27.9867	269	20.8438	250	18.2467	1	39288717	39298453	+	1362	Pdcl3	GO:0001525;GO:0001938;GO:0005634;GO:0005737;GO:0005737;GO:0005737;GO:0005829;GO:0006457;GO:0006915;GO:0008479;GO:0008616;GO:0043184;GO:0044183;GO:0045766;GO:0050730;GO:2000059;GO:0043184;	-	phosducin-like 3 [Source:MGISymbol;Acc:MGI:1916083]
MGP_C57BL6NJ_G0016346	4507	51	0.919636	69	0.995177	67	0.683857	46	1.06588	52	1.21763	38	0.838141	1	39507798	39686440	+	4507	Npas2	GO:0003677;GO:0003700;GO:0005634;GO:0005634;GO:0005667;GO:0005737;GO:0006351;GO:0006355;GO:0006355;GO:0046983;	-	neuronal PAS domain protein 2 [Source:MGISymbol;Acc:MGI:109232]
MGP_C57BL6NJ_G0016347	867	1809	169.572	2011	150.776	3411	180.984	1806	217.538	1646	200.36	2195	251.673	1	39692583	39696071	+	867	Rpl31	GO:0002181;GO:0002181;GO:0003723;GO:0003735;GO:0003735;GO:0005515;GO:0005622;GO:0005654;GO:0005730;GO:0005840;GO:0005840;GO:0005925;GO:0006412;GO:0016020;GO:0022625;GO:0022625;GO:0030529;GO:0042788;GO:0070062;	-	ribosomal protein L31 [Source:MGISymbol;Acc:MGI:2149632]
MGP_C57BL6NJ_G0016348	5239	483	7.49259	526	6.52644	449	3.94254	853	17.0034	1009	20.3256	1010	19.1643	1	39696197	39809103	-	5239	Tbc1d8	GO:0005096;GO:0005096;GO:0005622;GO:0005622;GO:0006886;GO:0012505;GO:0017137;GO:0031338;GO:0090630;	K19951	TBC1 domain family, member 8 [Source:MGISymbol;Acc:MGI:1927225]
MGP_C57BL6NJ_G0016349	3508	628	14.549	725	13.4344	540	7.08129	678	20.184	502	15.1024	625	17.7109	1	39873015	39890407	+	3508	Cnot11	GO:0003674;GO:0005634;GO:0005737;GO:0006351;GO:0006355;GO:0006417;GO:0008150;GO:0030014;GO:0030014;GO:0030014;GO:0031047;	-	CCR4-NOT transcription complex, subunit 11[Source:MGI Symbol;Acc:MGI:106580]
MGP_C57BL6NJ_G0016350	2838	2715	77.7483	3255	74.5551	11671	189.179	1589	58.472	1662	61.8044	1596	55.9038	1	39894804	39921804	-	2838	Rnf149	GO:0005515;GO:0006511;GO:0016020;GO:0016020;GO:0016021;GO:0016567;GO:0016567;GO:0016740;GO:0031647;GO:0031647;GO:0035690;GO:0035690;GO:0043409;GO:0043409;GO:0046872;GO:0061630;GO:0061630;GO:0061630;GO:0070062;	K15704	ring finger protein 149 [Source:MGISymbol;Acc:MGI:2677438]
MGP_C57BL6NJ_G0016351	6799	643	7.68598	927	8.86285	539	3.64688	403	6.19008	361	5.60355	516	7.54441	1	39967161	40001593	-	6799	Creg2	GO:0003674;GO:0005576;GO:0005783;GO:0005783;GO:0005794;GO:0005794;GO:0008150;GO:0048037;	-	cellular repressor of E1A-stimulated genes 2[Source:MGI Symbol;Acc:MGI:1928333]
MGP_C57BL6NJ_G0016352	2139	0	0	14	0.425457	0	0	0	0	0	0	0	0	1	40016144	40072806	-	2139	Rfx8	GO:0000978;GO:0003677;GO:0003677;GO:0003700;GO:0005634;GO:0005634;GO:0006351;GO:0006355;GO:0006355;GO:0006357;	-	regulatory factor X 8 [Source:MGISymbol;Acc:MGI:3588206]
MGP_C57BL6NJ_G0016353	352	0	0	0	0	0	0	0	0	0	0	0	0	1	40161232	40162416	-	352	Gm3646	GO:0003674;GO:0005575;GO:0008150;	-	predicted gene 3646 [Source:MGISymbol;Acc:MGI:3781822]
MGP_C57BL6NJ_G0016354	9579	7130	60.4927	8532	57.8988	4396	21.1113	2989	32.5868	2768	30.4963	2838	29.4519	1	40267371	40400663	+	9579	Map4k4	GO:0000166;GO:0004672;GO:0004674;GO:0005524;GO:0005524;GO:0006468;	K04407	mitogen-activated protein kinase kinase kinasekinase 4 [Source:MGI Symbol;Acc:MGI:1349394]
MGP_C57BL6NJ_G0016355	1908	0	0	2	0.0681382	0	0	0	0	0	0	0	0	1	40450369	40509628	+	1908	Il1r2	GO:0004908;GO:0004908;GO:0004910;GO:0005576;GO:0005737;GO:0005886;GO:0010955;GO:0016020;GO:0016021;GO:0019221;GO:0019966;GO:0050712;GO:1900016;GO:2000660;GO:0004908;GO:0005737;GO:0010955;GO:0019966;GO:0050712;GO:1900016;GO:2000660;	-	interleukin 1 receptor, type II [Source:MGISymbol;Acc:MGI:96546]
MGP_C57BL6NJ_G0016356	6381	526	6.69932	498	5.07317	129	0.929992	50	0.81831	8	0.132313	14	0.218102	1	40612725	40709659	+	6381	Il1r1	GO:0002020;GO:0002020;GO:0004871;GO:0004871;GO:0004908;GO:0004908;GO:0004908;GO:0004909;GO:0005161;GO:0005515;GO:0005515;GO:0005515;GO:0005576;GO:0005615;GO:0005634;GO:0005886;GO:0006954;GO:0007165;GO:0009314;GO:0009897;GO:0009897;GO:0009986;GO:0009986;GO:0009986;GO:0010286;GO:0014069;GO:0016020;GO:0016020;GO:0016021;GO:0019221;GO:0019221;GO:0019966;GO:0019966;GO:0030424;GO:0032729;GO:0032729;GO:…	K04386	interleukin 1 receptor, type I [Source:MGISymbol;Acc:MGI:96545]
MGP_C57BL6NJ_G0016357	6812	430	5.13012	392	3.74068	562	3.79525	217	3.32676	176	2.72671	182	2.65594	1	40716932	40760767	+	6812	Il1rl2	GO:0032755;GO:0045582;GO:0050727;	K05172	interleukin 1 receptor-like 2 [Source:MGISymbol;Acc:MGI:1913107]
MGP_C57BL6NJ_G0016358	6894	613	7.22641	828	7.80725	0	0	65	0.984642	6	0.0918503	91	1.31217	1	40833047	40872838	+	6894	Il1rl1	GO:0002113;GO:0002114;GO:0002826;GO:0004908;GO:0005515;GO:0005576;GO:0005578;GO:0005615;GO:0005886;GO:0007165;GO:0008285;GO:0009897;GO:0009986;GO:0016020;GO:0016020;GO:0016021;GO:0019221;GO:0031012;GO:0032689;GO:0032754;GO:0038172;GO:0043032;GO:0043124;GO:0050729;GO:0090197;GO:0002113;GO:0002114;GO:0002826;GO:0005578;GO:0009897;GO:0016020;GO:0031012;GO:0032689;GO:0032754;GO:0043032;GO:0043124;GO:…	-	interleukin 1 receptor-like 1 [Source:MGISymbol;Acc:MGI:98427]
MGP_C57BL6NJ_G0016359	4779	9	0.153052	2	0.0272039	1	0.0096259	114	2.49117	144	3.17999	91	1.89289	1	40872975	40912268	+	4779	Il18r1	GO:0005515;GO:0006954;GO:0007165;GO:0016020;GO:0016021;GO:0030101;GO:0032729;GO:0032729;GO:0035655;GO:0035655;GO:0042007;GO:0042007;GO:0042008;GO:0042346;GO:0045063;GO:0051092;GO:0051092;GO:0120163;GO:1901224;GO:2000556;GO:2000556;GO:0030101;GO:0032729;GO:0035655;GO:0042008;GO:0042346;GO:0045063;GO:0120163;GO:1901224;	-	interleukin 18 receptor 1 [Source:MGISymbol;Acc:MGI:105383]
MGP_C57BL6NJ_G0016360	6752	107	1.28791	54	0.519876	1	0.00681312	83	1.28375	182	2.84472	56	0.824473	1	40926776	40964159	+	6752	Il18rap	GO:0004908;GO:0005886;GO:0006954;GO:0007165;GO:0008283;GO:0008283;GO:0016020;GO:0016021;GO:0032609;GO:0032609;GO:0032635;GO:0032635;GO:0035655;GO:0035655;GO:0035655;GO:0035744;GO:0035744;GO:0042008;GO:0042008;GO:0042119;GO:0042119;GO:0045092;GO:0045954;GO:0045954;GO:0051092;GO:0051092;GO:0071351;GO:0071351;	K05174	interleukin 18 receptor accessory protein[Source:MGI Symbol;Acc:MGI:1338888]
MGP_C57BL6NJ_G0016361	4562	9	0.160332	9	0.128241	3	0.0302513	19	0.434945	9	0.208203	1	0.0217904	1	41005707	41075135	+	4562	Slc9a4	GO:0001696;GO:0001696;GO:0002064;GO:0002064;GO:0005886;GO:0005886;GO:0006810;GO:0006811;GO:0006812;GO:0006814;GO:0006814;GO:0006885;GO:0015297;GO:0015299;GO:0015385;GO:0015385;GO:0015386;GO:0016020;GO:0016021;GO:0016021;GO:0016323;GO:0016324;GO:0051453;GO:0055085;GO:0071805;GO:0098719;GO:1902600;	K13961	solute carrier family 9 (sodium/hydrogenexchanger), member 4 [Source:MGI Symbol;Acc:MGI:105074]
MGP_C57BL6NJ_G0016362	6984	8	0.0930935	0	0	17	0.111975	0	0	0	0	0	0	1	41138728	41243453	+	6984	Slc9a2	GO:0005886;GO:0005903;GO:0006810;GO:0006811;GO:0006812;GO:0006814;GO:0006814;GO:0006814;GO:0006814;GO:0006885;GO:0006885;GO:0006885;GO:0008104;GO:0008104;GO:0015297;GO:0015299;GO:0015385;GO:0015385;GO:0015385;GO:0015385;GO:0015386;GO:0016020;GO:0016021;GO:0016021;GO:0035725;GO:0051453;GO:0055085;GO:0071805;GO:0098719;GO:1902600;	K14722	solute carrier family 9 (sodium/hydrogenexchanger), member 2 [Source:MGI Symbol;Acc:MGI:105075]
MGP_C57BL6NJ_G0016363	5125	52	0.824599	95	1.20495	246	2.2081	46	0.937347	22	0.453033	17	0.329743	1	41246218	41267766	-	5125	Mfsd9	GO:0005215;GO:0005215;GO:0006810;GO:0016020;GO:0016021;GO:0016021;GO:0055085;GO:0055085;	-	major facilitator superfamily domain containing 9[Source:MGI Symbol;Acc:MGI:2443548]
MGP_C57BL6NJ_G0016364	2716	0	0	0	0	0	0	4	0.153804	0	0	0	0	1	41283903	41335649	+	2716	Tmem182	GO:0003674;GO:0005575;GO:0008150;GO:0016020;GO:0016021;GO:0016021;	-	transmembrane protein 182 [Source:MGISymbol;Acc:MGI:1923725]
MGP_C57BL6NJ_G0016365	7172	0	0	0	0	0	0	0	0	0	0	0	0	1	43367639	43376020	+	7172	Pou3f3	GO:0000122;GO:0001822;GO:0001822;GO:0003677;GO:0003677;GO:0003677;GO:0003677;GO:0003700;GO:0003700;GO:0003705;GO:0005515;GO:0005634;GO:0005634;GO:0005634;GO:0005634;GO:0006351;GO:0006355;GO:0006355;GO:0006357;GO:0007275;GO:0007399;GO:0007420;GO:0007588;GO:0007588;GO:0008284;GO:0008284;GO:0010628;GO:0021799;GO:0021799;GO:0021869;GO:0021869;GO:0043066;GO:0043066;GO:0043565;GO:0043565;GO:0043565;GO:…	K09365	POU domain, class 3, transcription factor 3[Source:MGI Symbol;Acc:MGI:102564]
MGP_C57BL6NJ_G0016366	5728	489	6.93808	531	6.02602	409	3.28472	336	6.12594	623	11.4785	343	5.95267	1	43541663	43598684	+	5728	Mrps9	GO:0000462;GO:0003723;GO:0003723;GO:0003735;GO:0003735;GO:0005730;GO:0005739;GO:0005739;GO:0005739;GO:0005763;GO:0005763;GO:0005840;GO:0005840;GO:0006412;GO:0006412;GO:0030529;	K02996	mitochondrial ribosomal protein S9 [Source:MGISymbol;Acc:MGI:1916777]
MGP_C57BL6NJ_G0016367	7273	0	0	0	0	0	0	1	0.014359	0	0	0	0	1	43646391	43732706	+	7273	Gpr45	-	K08409	G protein-coupled receptor 45 [Source:MGISymbol;Acc:MGI:2135882]
MGP_C57BL6NJ_G0016368	10972	412	3.05172	747	4.42561	1156	4.84675	416	3.95953	341	3.27997	434	3.9321	1	43744396	43799360	-	10972	Tgfbrap1	GO:0005160;GO:0005737;GO:0005768;GO:0005769;GO:0005769;GO:0006355;GO:0006810;GO:0006886;GO:0007165;GO:0007165;GO:0008333;GO:0015031;GO:0016020;GO:0016192;GO:0033263;GO:0033263;GO:0034058;GO:0043231;GO:0046332;GO:0046332;	K20177	transforming growth factor, beta receptorassociated protein 1 [Source:MGI Symbol;Acc:MGI:2447427]
MGP_C57BL6NJ_G0016369	3458	257	6.04007	237	4.45515	283	3.76478	132	3.98644	145	4.42531	128	3.67964	1	43799433	43816655	+	3458	AI597479	GO:0003674;GO:0008150;GO:0048598;GO:0072669;GO:0072669;GO:0072669;GO:0072669;	K15432	expressed sequence AI597479 [Source:MGISymbol;Acc:MGI:2138299]
MGP_C57BL6NJ_G0016370	1364	356	21.2114	385	18.3478	26	0.876874	41	3.13911	8	0.61898	3	0.218639	1	43826136	43868548	-	1364	Fhl2	GO:0000122;GO:0000122;GO:0001649;GO:0001649;GO:0005515;GO:0005515;GO:0005634;GO:0005634;GO:0005634;GO:0005634;GO:0005634;GO:0005737;GO:0005925;GO:0006351;GO:0006355;GO:0006357;GO:0006357;GO:0008134;GO:0008134;GO:0009725;GO:0030018;GO:0030018;GO:0030018;GO:0030018;GO:0031430;GO:0042802;GO:0043066;GO:0043066;GO:0045892;GO:0045892;GO:0046872;GO:0055014;GO:0055014;GO:0055015;GO:0055015;GO:0060347;GO:…	K14380	four and a half LIM domains 2 [Source:MGISymbol;Acc:MGI:1338762]
MGP_C57BL6NJ_G0016371	4455	339	6.18423	510	7.44151	581	5.99938	218	5.11029	369	8.74137	305	6.8057	1	44175011	44308520	+	4455	Nck2	GO:0001771;GO:0001784;GO:0005070;GO:0005515;GO:0005737;GO:0005737;GO:0005783;GO:0005783;GO:0005829;GO:0006417;GO:0007015;GO:0012506;GO:0014069;GO:0016477;GO:0030032;GO:0030838;GO:0032403;GO:0033137;GO:0036493;GO:0042102;GO:0044877;GO:0045202;GO:0045944;GO:0048013;GO:0060996;GO:0097110;GO:1902237;GO:1903898;GO:1903912;GO:1903912;GO:1990441;GO:0007015;GO:0012506;GO:0016477;GO:0030032;GO:0032403;GO:…	-	non-catalytic region of tyrosine kinase adaptorprotein 2 [Source:MGI Symbol;Acc:MGI:1306821]
MGP_C57BL6NJ_G0016372	902	0	0	5	0.360332	0	0	0	0	0	0	0	0	1	44474139	44491033	+	902	1500015O10Rik	GO:0003674;GO:0005576;GO:0005615;GO:0005615;GO:0005615;GO:0030133;GO:0031045;GO:0031145;GO:0031145;GO:0031410;GO:0070314;GO:0070314;GO:0090398;GO:0090398;	-	RIKEN cDNA 1500015O10 gene [Source:MGISymbol;Acc:MGI:1926146]
MGP_C57BL6NJ_G0016373	5097	554	8.83341	702	8.95285	449	4.05238	447	9.1586	408	8.44785	431	8.40589	1	44495409	44581638	-	5097	Uxs1	GO:0005737;GO:0005739;GO:0005739;GO:0005794;GO:0005794;GO:0016020;GO:0016021;GO:0016829;GO:0016831;GO:0032580;GO:0033320;GO:0042803;GO:0048040;GO:0048040;GO:0048040;GO:0048040;GO:0051262;GO:0070062;GO:0070403;GO:0070403;	K08678	UDP-glucuronate decarboxylase 1 [Source:MGISymbol;Acc:MGI:1915133]
MGP_C57BL6NJ_G0016374	10078	3314	26.7246	3253	20.9821	1850	8.44453	2169	22.4761	2624	27.4783	2095	20.6648	1	44687145	44773897	+	10078	Tpp2	-	K01280	tripeptidyl peptidase II [Source:MGISymbol;Acc:MGI:102724]
MGP_C57BL6NJ_G0016375	4300	0	0	0	0	0	0	0	0	0	0	0	0	1	44780299	44794978	-	4300	Mettl21c	GO:0005634;GO:0005634;GO:0006479;GO:0006479;GO:0007519;GO:0007519;GO:0008168;GO:0008628;GO:0008628;GO:0010880;GO:0010880;GO:0016279;GO:0016279;GO:0016740;GO:0018022;GO:0031072;GO:0032259;GO:0032991;GO:0043234;GO:0071549;GO:0071549;	K21805	methyltransferase like 21C [Source:MGISymbol;Acc:MGI:3611450]
MGP_C57BL6NJ_G0016376	5985	3	0.0407371	0	0	0	0	2	0.0348981	6	0.105801	0	0	1	44830785	44836769	-	5985	Gm8251	GO:0003674;GO:0005575;GO:0008150;	-	predicted gene 8251 [Source:MGISymbol;Acc:MGI:3647616]
MGP_C57BL6NJ_G0016377	1917	6	0.254368	11	0.373	12	0.287963	2	0.108954	15	0.825791	15	0.77784	1	44862422	44878046	-	1917	Tex30	GO:0003674;GO:0008150;GO:0016787;	-	testis expressed 30 [Source:MGISymbol;Acc:MGI:1922873]
MGP_C57BL6NJ_G0016378	3199	174	4.42047	202	4.10465	130	1.86942	84	2.74221	88	2.90315	75	2.3306	1	44882081	44894333	-	3199	Kdelc1	GO:0005783;GO:0005788;GO:0005788;GO:0005788;GO:0006664;GO:0046527;	-	KDEL (Lys-Asp-Glu-Leu) containing 1 [Source:MGISymbol;Acc:MGI:1919300]
MGP_C57BL6NJ_G0016379	2392	245	8.32412	239	6.49495	183	3.5194	133	5.80667	100	4.41204	138	5.73507	1	44894482	44920923	+	2392	-	-	-	-
MGP_C57BL6NJ_G0016380	5864	421	5.83474	471	5.22114	178	1.39638	197	3.5084	195	3.50947	225	3.81425	1	44925525	44958762	+	5864	Ercc5	-	K10846	excision repair cross-complementing rodent repairdeficiency, complementation group 5 [Source:MGISymbol;Acc:MGI:103582]
MGP_C57BL6NJ_G0016381	3979	0	0	0	0	0	0	0	0	0	0	0	0	1	44982054	44996962	-	3979	Mettl21e	GO:0003674;GO:0005575;GO:0008150;GO:0008168;GO:0016740;GO:0032259;	-	methyltransferase like 21E [Source:MGISymbol;Acc:MGI:2685837]
MGP_C57BL6NJ_G0016382	3758	175	3.78455	164	2.83678	0	0	9	0.250105	2	0.0561661	2	0.0529047	1	45339235	45598586	+	3758	Gulp1	GO:0003674;GO:0005737;GO:0006810;GO:0006869;GO:0006909;GO:0006911;GO:0006915;	-	GULP, engulfment adaptor PTB domain containing 1[Source:MGI Symbol;Acc:MGI:1920407]
MGP_C57BL6NJ_G0016383	9816	2180	18.0491	5126	33.9456	23	0.107788	175	1.86183	31	0.333294	67	0.678518	1	46187689	46232092	+	9816	Col3a1	GO:0001568;GO:0005578;GO:0005581;GO:0005586;GO:0005615;GO:0021987;GO:0030199;GO:0031012;GO:0031012;GO:0035025;GO:0046332;GO:0048565;GO:0060414;GO:0071230;GO:2001223;	K19720	collagen, type III, alpha 1 [Source:MGISymbol;Acc:MGI:88453]
MGP_C57BL6NJ_G0016384	9591	7902	66.9586	14759	100.03	115	0.551585	704	7.66558	149	1.63954	142	1.47179	1	46259870	46404834	-	9591	Col5a2	GO:0001501;GO:0001501;GO:0001501;GO:0005201;GO:0005201;GO:0005576;GO:0005578;GO:0005581;GO:0005581;GO:0005581;GO:0005581;GO:0005588;GO:0005588;GO:0005615;GO:0005615;GO:0005615;GO:0030020;GO:0030198;GO:0030199;GO:0030199;GO:0030199;GO:0030199;GO:0030903;GO:0031012;GO:0031012;GO:0031012;GO:0031012;GO:0043588;GO:0043588;GO:0043588;GO:0043588;GO:0046332;GO:0046332;GO:0046872;GO:0048592;GO:0062023;GO:…	K19721	collagen, type V, alpha 2 [Source:MGISymbol;Acc:MGI:88458]
MGP_C57BL6NJ_G0016385	4900	521	8.64122	689	9.14033	586	5.50148	251	5.34951	267	5.75064	279	5.66016	1	46750363	46779948	+	4900	Wdr75	GO:0003723;GO:0005634;GO:0005730;GO:0005730;GO:0006351;GO:0006355;GO:0006364;GO:0016020;GO:0016021;GO:0042254;GO:0045943;GO:1903146;GO:1903955;GO:2000234;	K14552	WD repeat domain 75 [Source:MGISymbol;Acc:MGI:1920924]
MGP_C57BL6NJ_G0016386	749	0	0	0	0	0	0	0	0	2	0.281805	0	0	1	46848491	46849352	-	749	Gm5269	-	-	predicted gene 5269 [Source:MGISymbol;Acc:MGI:3646793]
MGP_C57BL6NJ_G0016387	9000	1942	17.5364	2817	20.3462	791	4.04308	3010	34.9269	3776	44.2782	3494	38.5924	1	46869053	46888658	-	9000	Slc40a1	GO:0002260;GO:0002260;GO:0003158;GO:0003158;GO:0004872;GO:0004872;GO:0005381;GO:0005381;GO:0005381;GO:0005515;GO:0005515;GO:0005622;GO:0005654;GO:0005829;GO:0005886;GO:0005886;GO:0005886;GO:0006810;GO:0006811;GO:0006826;GO:0006826;GO:0006879;GO:0008021;GO:0008021;GO:0015093;GO:0015093;GO:0016020;GO:0016021;GO:0016021;GO:0016323;GO:0016323;GO:0016323;GO:0017046;GO:0017046;GO:0017046;GO:0034395;GO:…	K14685	solute carrier family 40 (iron-regulatedtransporter), member 1 [Source:MGISymbol;Acc:MGI:1315204]
MGP_C57BL6NJ_G0016390	5086	1230	19.6545	1035	13.2283	370	3.3466	768	15.7696	614	12.7407	759	14.835	1	48068517	48161201	-	5086	Slc39a10	GO:0002903;GO:0002903;GO:0005385;GO:0005385;GO:0005385;GO:0005886;GO:0005886;GO:0005887;GO:0006810;GO:0006811;GO:0006829;GO:0006882;GO:0006882;GO:0006882;GO:0016020;GO:0016020;GO:0016021;GO:0030001;GO:0030890;GO:0030890;GO:0046873;GO:0050861;GO:0050861;GO:0050861;GO:0055085;GO:0071578;GO:0071578;GO:0071578;GO:1903615;GO:1903615;	K14716	solute carrier family 39 (zinc transporter), member10 [Source:MGI Symbol;Acc:MGI:1914515]
MGP_C57BL6NJ_G0016391	6707	33	0.39987	89	0.862582	0	0	15	0.23356	0	0	0	0	1	52518159	52835644	+	6707	Tmeff2	-	-	transmembrane protein with EGF-like and twofollistatin-like domains 2 [Source:MGISymbol;Acc:MGI:1861735]
MGP_C57BL6NJ_G0016392	3055	758	20.1647	846	18.0011	4	0.060232	92	3.14494	14	0.483635	26	0.846025	1	52940402	52956238	+	3055	Sdpr	GO:0001786;GO:0001786;GO:0005080;GO:0005515;GO:0005654;GO:0005737;GO:0005737;GO:0005737;GO:0005829;GO:0005829;GO:0005886;GO:0005901;GO:0005901;GO:0005901;GO:0005901;GO:0008289;GO:0015629;GO:0016020;GO:0045121;GO:0045944;GO:0097320;GO:0097320;	-	serum deprivation response [Source:MGISymbol;Acc:MGI:99513]
MGP_C57BL6NJ_G0016393	8140	767	7.65781	825	6.58822	594	3.35691	1324	16.9863	1862	24.141	1400	17.0972	1	53127456	53139945	-	8140	Nabp1	GO:0000724;GO:0000724;GO:0000784;GO:0003677;GO:0003697;GO:0003697;GO:0003723;GO:0005634;GO:0005634;GO:0005654;GO:0005829;GO:0006281;GO:0006281;GO:0006974;GO:0006974;GO:0007093;GO:0007093;GO:0010212;GO:0010212;GO:0070876;GO:0070876;GO:0000784;GO:0003697;GO:0003723;GO:0005634;	-	nucleic acid binding protein 1 [Source:MGISymbol;Acc:MGI:1923258]
MGP_C57BL6NJ_G0016394	10792	1714	12.9075	2065	12.4382	1991	8.48687	300	2.90306	202	1.97538	124	1.1422	1	53424046	53593225	-	10792	Myo1b	GO:0000146;GO:0000146;GO:0000166;GO:0003774;GO:0003774;GO:0003774;GO:0003777;GO:0003779;GO:0003779;GO:0005516;GO:0005516;GO:0005524;GO:0005524;GO:0005524;GO:0005546;GO:0005546;GO:0005547;GO:0005547;GO:0005737;GO:0005737;GO:0005769;GO:0005884;GO:0005886;GO:0005886;GO:0005903;GO:0005903;GO:0006892;GO:0007015;GO:0007018;GO:0008017;GO:0010008;GO:0016459;GO:0016459;GO:0030048;GO:0030048;GO:0030175;GO:…	K10356	myosin IB [Source:MGI Symbol;Acc:MGI:107752]"
MGP_C57BL6NJ_G0016395	3872	13	0.272861	0	0	3	0.0356422	17	0.458511	19	0.517868	14	0.359429	1	53664175	53788748	+	3872	Stat4	GO:0003677;GO:0003677;GO:0003700;GO:0004871;GO:0004871;GO:0005634;GO:0005634;GO:0005737;GO:0006351;GO:0006355;GO:0006355;GO:0007165;GO:0019221;GO:0045944;	K11222	signal transducer and activator of transcription 4[Source:MGI Symbol;Acc:MGI:103062]
MGP_C57BL6NJ_G0016396	7105	852	9.74561	702	6.42261	1076	6.96669	1698	24.958	2293	34.0597	1187	16.6076	1	53800977	53842750	+	7105	Stat1	GO:0003677;GO:0003677;GO:0003700;GO:0004871;GO:0004871;GO:0005634;GO:0005634;GO:0005737;GO:0006351;GO:0006355;GO:0006355;GO:0007165;	K11220	signal transducer and activator of transcription 1[Source:MGI Symbol;Acc:MGI:103063]
MGP_C57BL6NJ_G0016397	15056	2802	15.1249	3176	13.7123	1555	4.75115	1422	9.86339	1369	9.5961	1223	8.07491	1	53844333	53930651	-	15056	Gls	GO:0001967;GO:0001967;GO:0002087;GO:0002087;GO:0004359;GO:0004359;GO:0004359;GO:0004359;GO:0004359;GO:0005515;GO:0005737;GO:0005739;GO:0005739;GO:0005759;GO:0005829;GO:0006537;GO:0006537;GO:0006537;GO:0006537;GO:0006541;GO:0006543;GO:0006543;GO:0006543;GO:0006543;GO:0007268;GO:0007268;GO:0016787;GO:0051289;GO:0051289;GO:0051289;	K01425	glutaminase [Source:MGI Symbol;Acc:MGI:95752]"
MGP_C57BL6NJ_G0016398	4100	1441	28.5636	1681	26.6516	614	6.8891	1167	29.7251	949	24.4277	1122	27.2038	1	54163050	54206731	-	4100	Nab1	GO:0001958;GO:0001958;GO:0005634;GO:0005634;GO:0005634;GO:0006351;GO:0006355;GO:0006355;GO:0006355;GO:0006355;GO:0006355;GO:0008134;GO:0008134;GO:0014037;GO:0014037;GO:0042552;GO:0042552;GO:0045682;GO:0045682;GO:0045892;	K22388	Ngfi-A binding protein 1 [Source:MGISymbol;Acc:MGI:107564]
MGP_C57BL6NJ_G0016399	7078	93	1.06784	64	0.587771	19	0.123487	84	1.23938	83	1.23757	103	1.4466	1	54350617	54371833	+	7078	Nemp2	GO:0003674;GO:0005634;GO:0005635;GO:0005637;GO:0008150;GO:0016020;GO:0016021;	-	nuclear envelope integral membrane protein 2[Source:MGI Symbol;Acc:MGI:2444113]
MGP_C57BL6NJ_G0016400	8293	725	7.10493	944	7.39944	732	4.06048	327	4.11787	447	5.68849	455	5.45407	1	54376581	54451055	-	8293	Mfsd6	GO:0002250;GO:0002376;GO:0005886;GO:0016020;GO:0016020;GO:0016021;GO:0032393;GO:0042288;GO:0042590;	-	major facilitator superfamily domain containing 6[Source:MGI Symbol;Acc:MGI:1922925]
MGP_C57BL6NJ_G0016401	6243	261	3.39767	256	2.66554	116	0.854757	145	2.42555	127	2.1469	106	1.68785	1	54499805	54535229	-	6243	Inpp1	GO:0004441;GO:0004441;GO:0016311;GO:0016787;GO:0046854;GO:0046855;GO:0046872;	K01107	inositol polyphosphate-1-phosphatase [Source:MGISymbol;Acc:MGI:104848]
MGP_C57BL6NJ_G0016402	5433	188	2.81224	199	2.38096	231	1.95592	101	1.94141	203	3.94328	115	2.10416	1	54570453	54652935	+	5433	Hibch	GO:0005739;	K05605	3-hydroxyisobutyryl-Coenzyme A hydrolase[Source:MGI Symbol;Acc:MGI:1923792]
MGP_C57BL6NJ_G0016403	4285	1	0.0189663	0	0	0	0	1	0.0243717	5	0.123146	2	0.0463981	1	54654881	54741012	-	4285	1700019D03Rik	GO:0003674;GO:0005886;GO:0008150;GO:0016020;GO:0034237;	-	RIKEN cDNA 1700019D03 gene [Source:MGISymbol;Acc:MGI:1914330]
MGP_C57BL6NJ_G0016404	2705	0	0	0	0	0	0	0	0	0	0	0	0	1	54789853	54796292	+	2705	Mstn	GO:0005102;GO:0005102;GO:0005102;GO:0005125;GO:0005125;GO:0005160;GO:0005515;GO:0005576;GO:0005615;GO:0005615;GO:0005615;GO:0005615;GO:0005623;GO:0005737;GO:0007179;GO:0007179;GO:0008083;GO:0008083;GO:0008201;GO:0008201;GO:0010469;GO:0010862;GO:0014732;GO:0014732;GO:0014741;GO:0033673;GO:0033673;GO:0042802;GO:0042802;GO:0042802;GO:0042803;GO:0042803;GO:0042981;GO:0043408;GO:0045662;GO:0045893;GO:…	K05497	myostatin [Source:MGI Symbol;Acc:MGI:95691]"
MGP_C57BL6NJ_G0016405	768	3	0.317463	0	0	0	0	0	0	13	1.78642	0	0	1	54878412	54913596	-	768	1700019A02Rik	GO:0003674;GO:0005575;GO:0008150;	-	RIKEN cDNA 1700019A02 gene [Source:MGISymbol;Acc:MGI:1916647]
MGP_C57BL6NJ_G0016406	4991	83	1.35152	98	1.27637	56	0.516153	115	2.40628	127	2.68545	99	1.97183	1	54915147	55018129	-	4991	Pms1	GO:0003677;GO:0003697;GO:0005524;GO:0005634;GO:0006298;GO:0006298;GO:0006298;GO:0006298;GO:0016887;GO:0016887;GO:0030983;GO:0032300;GO:0032300;GO:0032389;	K10864	postmeiotic segregation increased 1 (S. cerevisiae)[Source:MGI Symbol;Acc:MGI:1202302]
MGP_C57BL6NJ_G0016407	4719	107	1.84275	76	1.04689	154	1.50124	54	1.19503	45	1.00638	61	1.28499	1	55018206	55033328	+	4719	Ormdl1	-	-	ORM1-like 1 (S. cerevisiae) [Source:MGISymbol;Acc:MGI:2181669]
MGP_C57BL6NJ_G0016408	785	0	0	0	0	0	0	0	0	0	0	0	0	1	55018222	55041054	+	785	Gm28778	GO:0005789;GO:0006672;GO:0006672;GO:0016020;GO:0016021;GO:0016021;GO:0035339;GO:0090155;GO:0090156;GO:1900060;	-	predicted gene 28778 [Source:MGISymbol;Acc:MGI:5579484]
MGP_C57BL6NJ_G0016409	6147	148	1.95673	83	0.877715	63	0.471472	83	1.4101	101	1.73404	132	2.13467	1	55036643	55049362	+	6147	Osgepl1	GO:0000408;GO:0002949;GO:0002949;GO:0002949;GO:0004222;GO:0005739;GO:0005739;GO:0005739;GO:0006508;GO:0008033;GO:0016740;GO:0016746;GO:0016747;GO:0046872;GO:0061711;GO:0005739;	K01409	O-sialoglycoprotein endopeptidase-like 1[Source:MGI Symbol;Acc:MGI:1919335]
MGP_C57BL6NJ_G0016410	3142	0	0	0	0	0	0	0	0	0	0	0	0	1	55048526	55076932	-	3142	Gm28551	GO:0004066;GO:0004066;GO:0006529;GO:0006529;GO:0006529;GO:0006541;GO:0008652;GO:0042803;	-	predicted gene 28551 [Source:MGISymbol;Acc:MGI:5579257]
MGP_C57BL6NJ_G0016411	3528	18	0.414646	37	0.681729	26	0.339018	15	0.444016	10	0.299138	15	0.422653	1	55067451	55077017	-	3528	Asnsd1	GO:0004066;GO:0004066;GO:0006529;GO:0006529;GO:0006529;GO:0006541;GO:0008652;GO:0042803;	-	asparagine synthetase domain containing 1[Source:MGI Symbol;Acc:MGI:1917646]
MGP_C57BL6NJ_G0016412	669	0	0	0	0	0	0	0	0	0	0	0	0	1	55563354	55573889	-	669	-	-	#N/A	-
MGP_C57BL6NJ_G0016413	5079	655	10.4809	1116	14.2832	1045	9.46491	544	11.1855	719	14.94	542	10.6082	1	55656007	55685685	-	5079	Stk17b	GO:0000166;GO:0004672;GO:0004672;GO:0004672;GO:0004674;GO:0004674;GO:0004674;GO:0005524;GO:0005524;GO:0005524;GO:0005524;GO:0005634;GO:0005634;GO:0005634;GO:0005793;GO:0005886;GO:0006468;GO:0006468;GO:0006468;GO:0006915;GO:0006915;GO:0012501;GO:0015629;GO:0016020;GO:0016301;GO:0016310;GO:0016740;GO:0035556;GO:0035556;GO:0046777;GO:0046777;GO:2000271;GO:2000271;	K08804	serine/threonine kinase 17b (apoptosis-inducing)[Source:MGI Symbol;Acc:MGI:2138162]
MGP_C57BL6NJ_G0016414	12947	74	0.464511	69	0.346433	0	0	18	0.145191	0	0	8	0.0614245	1	55710298	56115438	-	12947	Hecw2	GO:0000209;GO:0004842;GO:0005737;GO:0005737;GO:0005819;GO:0005856;GO:0006511;GO:0016567;GO:0016567;GO:0016740;GO:0016874;GO:0030071;GO:0042787;GO:0043161;GO:0045732;GO:0048814;GO:0061630;GO:0072686;GO:2000650;	K12168	HECT, C2 and WW domain containing E3 ubiquitinprotein ligase 2 [Source:MGI Symbol;Acc:MGI:2685817]
MGP_C57BL6NJ_G0016415	5021	19	0.307537	10	0.129464	0	0	4	0.0831967	10	0.210189	4	0.0791937	1	56170877	56292497	+	5021	Ccdc150	-	-	coiled-coil domain containing 150 [Source:MGISymbol;Acc:MGI:1925266]
MGP_C57BL6NJ_G0016416	4921	635	10.4871	603	7.96531	622	5.81454	385	8.17041	384	8.23529	355	7.17127	1	56316654	56355250	-	4921	Gtf3c3	GO:0000127;GO:0000127;GO:0000995;GO:0001004;GO:0005634;GO:0005730;GO:0006359;GO:0006383;GO:0006383;GO:0031965;GO:0070898;	K15201	general transcription factor IIIC, polypeptide 3[Source:MGI Symbol;Acc:MGI:2138383]
MGP_C57BL6NJ_G0016417	16611	1279	6.25761	1609	6.2965	894	2.47583	2278	14.3217	3024	19.2126	2410	14.4226	1	56394828	56485186	-	16611	Pgap1	GO:0004518;GO:0004518;GO:0005783;GO:0005783;GO:0005783;GO:0005789;GO:0006505;GO:0006506;GO:0006810;GO:0006888;GO:0007605;GO:0007605;GO:0009880;GO:0009880;GO:0009948;GO:0009948;GO:0015031;GO:0015798;GO:0015798;GO:0016020;GO:0016021;GO:0016787;GO:0016788;GO:0021871;GO:0021871;GO:0042578;GO:0042578;GO:0050185;GO:0060322;GO:0060322;GO:0090305;	K05294	post-GPI attachment to proteins 1 [Source:MGISymbol;Acc:MGI:2443342]
MGP_C57BL6NJ_G0016418	14119	1643	9.4573	1697	7.81298	495	1.6128	1531	11.3242	1824	13.6339	1354	9.53313	1	56587384	56880675	-	14119	Ankrd44	-	K15503	ankyrin repeat domain 44 [Source:MGISymbol;Acc:MGI:3045243]
MGP_C57BL6NJ_G0016419	11370	4446	31.7792	5773	33.005	2279	9.22066	3250	29.851	3539	32.8489	3082	26.9459	1	56947850	57000548	-	11370	Sf3b1	GO:0000245;GO:0003729;	K12828	splicing factor 3b, subunit 1 [Source:MGISymbol;Acc:MGI:1932339]
MGP_C57BL6NJ_G0016420	4805	255	4.31301	310	4.19379	318	3.04447	153	3.32533	146	3.20671	199	4.117	1	57031011	57050919	+	4805	Coq10b	-	K18588	coenzyme Q10B [Source:MGI Symbol;Acc:MGI:1915126]"
MGP_C57BL6NJ_G0016421	3751	3719	80.5773	2890	50.0829	1138	13.9564	1774	49.3904	1848	51.9943	1119	29.6554	1	57052193	57072671	-	3751	Hspd1	GO:0000166;GO:0001530;GO:0001530;GO:0002020;GO:0002039;GO:0002368;GO:0002755;GO:0002842;GO:0003723;GO:0003725;GO:0005524;GO:0005524;GO:0005615;GO:0005737;GO:0005737;GO:0005739;GO:0005739;GO:0005739;GO:0005743;GO:0005759;GO:0005759;GO:0005769;GO:0005782;GO:0005791;GO:0005794;GO:0005829;GO:0005829;GO:0005886;GO:0005905;GO:0006457;GO:0006458;GO:0006919;GO:0006986;GO:0007005;GO:0008035;GO:0008637;GO:…	K04077	heat shock protein 1 (chaperonin) [Source:MGISymbol;Acc:MGI:96242]
MGP_C57BL6NJ_G0016422	1474	1325	73.0553	1236	54.5079	1062	33.144	849	60.1515	727	52.052	837	56.448	1	57072560	57075735	+	1474	Hspe1	GO:0001649;GO:0003723;GO:0005524;GO:0005737;GO:0005739;GO:0005739;GO:0005739;GO:0005759;GO:0005759;GO:0005759;GO:0006457;GO:0006986;GO:0016020;GO:0046872;GO:0051082;GO:0051085;GO:0051087;GO:0051087;GO:0051087;GO:0070062;	K04078	heat shock protein 1 (chaperonin 10) [Source:MGISymbol;Acc:MGI:104680]
MGP_C57BL6NJ_G0016423	4852	501	8.39171	561	7.5159	206	1.9531	420	9.03993	399	8.67866	420	8.60497	1	57120166	57148086	+	4852	Mob4	GO:0005737;GO:0005737;GO:0005794;GO:0005794;GO:0005829;GO:0006810;GO:0016020;GO:0016020;GO:0019900;GO:0019900;GO:0032580;GO:0043025;GO:0043197;GO:0046872;GO:0048471;GO:0048471;	-	MOB family member 4, phocein [Source:MGISymbol;Acc:MGI:104899]
MGP_C57BL6NJ_G0016424	5871	120	1.66113	238	2.63514	129	1.01078	48	0.853819	22	0.395468	16	0.270912	1	57165419	57225458	-	5871	Rftn2	GO:0003674;GO:0005737;GO:0005886;GO:0016020;GO:0032596;GO:0033227;GO:0033227;GO:0043330;GO:0043330;GO:0045121;GO:0050851;	-	raftlin family member 2 [Source:MGISymbol;Acc:MGI:1921263]
MGP_C57BL6NJ_G0016425	11294	153	1.10097	231	1.32954	118	0.480632	115	1.06338	82	0.766244	49	0.43129	1	57239719	57251012	+	11294	Mars2	GO:0000166;GO:0000166;GO:0004812;GO:0004812;GO:0004825;GO:0004825;GO:0004825;GO:0004825;GO:0005524;GO:0005524;GO:0005737;GO:0005739;GO:0005739;GO:0005739;GO:0005739;GO:0005759;GO:0005759;GO:0006412;GO:0006418;GO:0006431;GO:0006431;GO:0006431;GO:0016874;	K01874	methionine-tRNA synthetase 2 (mitochondrial)[Source:MGI Symbol;Acc:MGI:2444136]
MGP_C57BL6NJ_G0016426	3504	0	0	0	0	0	0	0	0	0	0	0	0	1	57251200	57374682	-	3504	Boll	GO:0003676;GO:0003723;GO:0003729;GO:0003730;GO:0005737;GO:0005737;GO:0005737;GO:0006417;GO:0007275;GO:0007281;GO:0007283;GO:0008494;GO:0008494;GO:0030154;GO:0045948;GO:0045948;GO:0051321;GO:0070935;	-	bol, boule-like (Drosophila) [Source:MGISymbol;Acc:MGI:1922638]
MGP_C57BL6NJ_G0016427	6683	57	0.693165	101	0.982401	13	0.089485	21	0.328159	2	0.0315834	8	0.118998	1	57415348	57809181	+	6683	Plcl1	GO:0004435;GO:0004871;GO:0005737;GO:0005886;GO:0005886;GO:0006629;GO:0007165;GO:0007165;GO:0007214;GO:0007214;GO:0008081;GO:0032228;GO:0032228;GO:0032228;GO:0033135;GO:0033135;GO:0035556;GO:0050811;GO:0050811;GO:0070679;GO:0120163;GO:0120163;GO:1900122;GO:1900122;	K15375	phospholipase C-like 1 [Source:MGISymbol;Acc:MGI:3036262]
MGP_C57BL6NJ_G0016428	1392	1	0.0583841	0	0	0	0	0	0	0	0	0	0	1	58755398	58756789	-	1392	Hsfy2	GO:0000978;GO:0003674;GO:0003677;GO:0003700;GO:0003700;GO:0005575;GO:0005634;GO:0005634;GO:0005634;GO:0006355;GO:0008150;GO:0034605;GO:0043565;GO:0043565;GO:0061408;	-	heat shock transcription factor, Y-linked 2[Source:MGI Symbol;Acc:MGI:1918316]
MGP_C57BL6NJ_G0016429	6788	259	3.10093	374	3.58153	43	0.29141	82	1.26156	100	1.55474	83	1.21551	1	58926675	59126707	-	6788	Satb2	GO:0000118;GO:0000122;GO:0000790;GO:0000977;GO:0000978;GO:0001077;GO:0001227;GO:0001764;GO:0002076;GO:0003677;GO:0003677;GO:0003677;GO:0003682;GO:0005515;GO:0005515;GO:0005634;GO:0005634;GO:0005634;GO:0005654;GO:0005654;GO:0005667;GO:0006325;GO:0006338;GO:0006351;GO:0006355;GO:0006366;GO:0007275;GO:0009880;GO:0010468;GO:0016363;GO:0016569;GO:0021902;GO:0043565;GO:0043565;GO:0045944;GO:0045944;GO:…	-	special AT-rich sequence binding protein 2[Source:MGI Symbol;Acc:MGI:2679336]
MGP_C57BL6NJ_G0016430	3235	57	1.43197	88	1.76826	53	0.753668	40	1.29129	75	2.44674	50	1.53644	1	59559745	59569080	+	3235	1700066M21Rik	GO:0003674;GO:0005575;GO:0005576;GO:0008150;	-	RIKEN cDNA 1700066M21 gene [Source:MGISymbol;Acc:MGI:1920717]
MGP_C57BL6NJ_G0016431	2808	137	3.96513	164	3.79652	37	0.606154	72	2.67776	73	2.74364	93	3.29236	1	59571894	59590754	-	2808	Tyw5	GO:0000049;GO:0000049;GO:0000049;GO:0005506;GO:0005506;GO:0005575;GO:0008033;GO:0016491;GO:0016706;GO:0016706;GO:0016706;GO:0031591;GO:0031591;GO:0031591;GO:0042803;GO:0042803;GO:0046872;GO:0051213;GO:0055114;GO:0055114;GO:0102524;	K18066	tRNA-yW synthesizing protein 5 [Source:MGISymbol;Acc:MGI:1915986]
MGP_C57BL6NJ_G0016432	3540	85	1.95141	149	2.73604	326	4.23636	83	2.44856	79	2.35518	114	3.20127	1	59589981	59602041	+	3540	9430016H08Rik	GO:0005739;GO:0005743;GO:0005759;GO:0005759;GO:0007007;GO:0032979;GO:0036444;GO:0036444;GO:0043022;GO:0051204;GO:0051204;GO:0051560;GO:0051560;GO:0097033;GO:0097034;	-	RIKEN cDNA 9430016H08 gene [Source:MGISymbol;Acc:MGI:1915365]
MGP_C57BL6NJ_G0016433	6081	22	0.294023	17	0.181724	0	0	0	0	0	0	1	0.0163473	1	59969419	60146324	+	6081	Spats2l	GO:0003723;GO:0005634;GO:0005634;GO:0005730;GO:0005730;GO:0005737;GO:0005737;GO:0005829;GO:0008150;GO:0032991;GO:0043234;	-	spermatogenesis associated, serine-rich 2-like[Source:MGI Symbol;Acc:MGI:1914448]
MGP_C57BL6NJ_G0016434	12973	217	1.35942	235	1.17751	290	1.02834	206	1.6583	159	1.29347	222	1.70111	1	60154962	60218955	-	12973	Kctd18	GO:0003674;GO:0005575;GO:0008150;GO:0051260;	-	potassium channel tetramerisation domain containing18 [Source:MGI Symbol;Acc:MGI:3603813]
MGP_C57BL6NJ_G0016435	7007	296	3.43315	348	3.22839	15	0.0984776	339	5.05247	399	6.00954	312	4.42633	1	60193197	60225898	+	7007	Sgol2a	GO:0000775;GO:0000775;GO:0000775;GO:0000775;GO:0000776;GO:0000776;GO:0000777;GO:0000779;GO:0000779;GO:0000780;GO:0000780;GO:0005515;GO:0005634;GO:0005654;GO:0005694;GO:0007049;GO:0007059;GO:0007140;GO:0007140;GO:0007143;GO:0007143;GO:0008104;GO:0008104;GO:0010789;GO:0010789;GO:0016604;GO:0030892;GO:0051301;GO:0051321;GO:0051754;GO:0051754;GO:0051754;GO:2000711;GO:2000711;	K11581	shugoshin-like 2a (S. pombe) [Source:MGISymbol;Acc:MGI:1098767]
MGP_C57BL6NJ_G0016436	8683	205	1.91875	95	0.711201	78	0.413241	37	0.445009	68	0.826494	55	0.629671	1	60231857	60310903	+	8683	Aox1	GO:0003824;GO:0005506;GO:0009055;GO:0016491;GO:0016614;GO:0022900;GO:0043546;GO:0046872;GO:0046872;GO:0050660;GO:0051287;GO:0051536;GO:0051536;GO:0051537;GO:0051537;GO:0055114;GO:0071949;	K00157	aldehyde oxidase 1 [Source:MGISymbol;Acc:MGI:88035]
MGP_C57BL6NJ_G0016437	7033	0	0	0	0	2	0.0130818	0	0	0	0	0	0	1	60318949	60408371	+	7033	Aox3	GO:0004031;GO:0009055;GO:0030151;	K00157	aldehyde oxidase 3 [Source:MGISymbol;Acc:MGI:1918974]
MGP_C57BL6NJ_G0016438	8416	9	0.0869101	4	0.0308953	0	0	0	0	0	0	0	0	1	60418070	60480232	+	8416	Aox4	GO:0003824;GO:0004031;GO:0004031;GO:0004854;GO:0005506;GO:0005506;GO:0005737;GO:0005829;GO:0005829;GO:0009055;GO:0009055;GO:0009115;GO:0016491;GO:0016491;GO:0016614;GO:0016903;GO:0017144;GO:0022900;GO:0030151;GO:0042803;GO:0043546;GO:0046872;GO:0046872;GO:0050250;GO:0050660;GO:0050660;GO:0050660;GO:0051287;GO:0051536;GO:0051536;GO:0051537;GO:0051537;GO:0055114;GO:0055114;GO:0071949;GO:0102797;GO:…	K00157	aldehyde oxidase 4 [Source:MGISymbol;Acc:MGI:1919122]
MGP_C57BL6NJ_G0016439	5771	0	0	8	0.090111	0	0	0	0	0	0	0	0	1	60489943	60586725	+	5771	Aox2	GO:0003824;GO:0004031;GO:0004854;GO:0005506;GO:0005506;GO:0005737;GO:0005829;GO:0005829;GO:0009055;GO:0009115;GO:0016491;GO:0016491;GO:0016614;GO:0016903;GO:0017144;GO:0022900;GO:0042803;GO:0043546;GO:0046872;GO:0046872;GO:0050250;GO:0050660;GO:0050660;GO:0050660;GO:0051287;GO:0051536;GO:0051536;GO:0051537;GO:0051537;GO:0055114;GO:0055114;GO:0071949;GO:0102797;GO:0102798;	K00157	aldehyde oxidase 2 [Source:MGISymbol;Acc:MGI:3529596]
MGP_C57BL6NJ_G0016440	3779	10261	220.672	7124	122.542	2756	33.5491	5653	156.221	4571	127.654	5324	140.05	1	60601738	60616268	+	3779	Bzw1	GO:0003723;GO:0005737;GO:0005737;GO:0006351;GO:0006355;GO:0016020;GO:0045296;	-	basic leucine zipper and W2 domains 1 [Source:MGISymbol;Acc:MGI:1914132]
MGP_C57BL6NJ_G0016441	8132	2203	22.0166	2338	18.689	314	1.77628	1966	25.2477	2229	28.9277	2058	25.1576	1	60619104	60633065	-	8132	Clk1	GO:0004674;GO:0004713;GO:0005634;GO:0018105;GO:0018107;GO:0018108;GO:0046777;	K08823	CDC-like kinase 1 [Source:MGISymbol;Acc:MGI:107403]
MGP_C57BL6NJ_G0016442	4283	164	3.11193	188	2.85331	482	5.17699	155	3.77938	139	3.42505	128	2.97086	1	60640054	60654395	-	4283	Ppil3	GO:0000413;GO:0000413;GO:0003755;GO:0003755;GO:0003755;GO:0005681;GO:0006397;GO:0006457;GO:0008380;GO:0016853;GO:0071013;	K12734	peptidylprolyl isomerase (cyclophilin)-like 3[Source:MGI Symbol;Acc:MGI:1917475]
MGP_C57BL6NJ_G0016443	7570	128	1.37419	233	2.00078	670	4.07153	135	1.86241	112	1.56143	142	1.86472	1	60654060	60690923	+	7570	Nif3l1	GO:0005515;GO:0005634;GO:0005634;GO:0005737;GO:0005737;GO:0005737;GO:0005737;GO:0005739;GO:0005739;GO:0005739;GO:0008134;GO:0030182;GO:0030182;GO:0042802;GO:0045893;GO:1903507;GO:1903507;	-	Ngg1 interacting factor 3-like 1 (S. pombe)[Source:MGI Symbol;Acc:MGI:1929485]
MGP_C57BL6NJ_G0016444	3857	376	7.92267	584	9.84242	372	4.43682	231	6.25459	241	6.59429	291	7.50005	1	60671306	60719411	-	3857	Orc2	GO:0000784;GO:0000785;GO:0000785;GO:0000792;GO:0000792;GO:0000808;GO:0000808;GO:0000939;GO:0000939;GO:0003688;GO:0003688;GO:0003688;GO:0005634;GO:0005634;GO:0005634;GO:0005654;GO:0005664;GO:0005664;GO:0005664;GO:0005813;GO:0006260;GO:0006260;GO:0016020;	K02604	origin recognition complex, subunit 2 [Source:MGISymbol;Acc:MGI:1328306]
MGP_C57BL6NJ_G0016445	12008	450	3.04562	523	2.8312	121	0.463546	273	2.37426	254	2.23236	180	1.49013	1	60738609	60804026	-	12008	Fam126b	GO:0003674;GO:0005622;GO:0005737;GO:0005829;GO:0005886;GO:0008150;GO:0016020;	K21844	family with sequence similarity 126, member B[Source:MGI Symbol;Acc:MGI:1098784]
MGP_C57BL6NJ_G0016446	763	347	36.9605	523	44.557	112	6.75261	211	28.8798	104	14.385	186	24.2331	1	60804087	60814615	+	763	Ndufb3	GO:0003674;GO:0005739;GO:0005739;GO:0005739;GO:0005739;GO:0005743;GO:0005743;GO:0005743;GO:0005747;GO:0005747;GO:0005747;GO:0005747;GO:0016020;GO:0016021;GO:0022900;GO:0032981;GO:0032981;GO:0032981;GO:0055114;GO:0070062;GO:0070469;	K03959	NADH dehydrogenase (ubiquinone) 1 beta subcomplex 3[Source:MGI Symbol;Acc:MGI:1913745]
MGP_C57BL6NJ_G0016447	2562	0	0	0	0	0	0	0	0	0	0	0	0	1	60908538	60949249	-	2562	Als2cr12	GO:0001520;GO:0001520;GO:0003674;GO:0005737;GO:0005737;GO:0005737;GO:0005929;GO:0008150;GO:0031514;GO:0035686;GO:0035686;GO:0036126;GO:0036126;GO:0042995;	-	amyotrophic lateral sclerosis 2 (juvenile)chromosome region, candidate 12 (human) [Source:MGISymbol;Acc:MGI:1918359]
MGP_C57BL6NJ_G0016448	12704	4273	27.3354	4579	23.4298	4010	14.5205	4492	36.9263	5115	42.4919	4270	33.4124	1	60972615	61017995	+	12704	Cflar	-	K04724	CASP8 and FADD-like apoptosis regulator [Source:MGISymbol;Acc:MGI:1336166]
MGP_C57BL6NJ_G0016449	2893	1705	47.8971	1438	32.3109	1496	23.7882	1891	68.2621	1651	60.2281	1724	59.2393	1	61066741	61112266	+	2893	Casp8	GO:0001525;GO:0001841;GO:0004175;GO:0004197;GO:0004197;GO:0005123;GO:0005164;GO:0005515;GO:0005515;GO:0005515;GO:0005634;GO:0005654;GO:0005737;GO:0005737;GO:0005737;GO:0005737;GO:0005739;GO:0005829;GO:0005886;GO:0006508;GO:0006508;GO:0006508;GO:0006915;GO:0006915;GO:0006915;GO:0006915;GO:0006919;GO:0006919;GO:0007507;GO:0008233;GO:0008233;GO:0008234;GO:0008234;GO:0008625;GO:0008625;GO:0016787;GO:…	K04398	caspase 8 [Source:MGI Symbol;Acc:MGI:1261423]"
MGP_C57BL6NJ_G0016450	7262	1375	15.3879	1750	15.6646	1256	7.95631	787	11.3176	813	11.815	818	11.1974	1	61174040	61241634	-	7262	Trak2	GO:0005102;GO:0005102;GO:0005634;GO:0005737;GO:0005737;GO:0005739;GO:0005739;GO:0005769;GO:0005886;GO:0006357;GO:0006493;GO:0006605;GO:0006605;GO:0008089;GO:0008104;GO:0008333;GO:0017022;GO:0019894;GO:0019899;GO:0022008;GO:0030425;GO:0030425;GO:0030911;GO:0031410;GO:0032839;GO:0032839;GO:0043005;GO:0043025;GO:0044295;GO:0047496;GO:0048311;GO:0048813;GO:0050771;GO:0050811;GO:0050811;GO:0098939;GO:…	K15374	trafficking protein, kinesin binding 2 [Source:MGISymbol;Acc:MGI:1918077]
MGP_C57BL6NJ_G0016451	7250	248	2.78002	275	2.46566	841	5.33625	253	3.64434	260	3.78474	294	4.03116	1	61241553	61264543	+	7250	Stradb	GO:0000902;GO:0004672;GO:0007254;GO:2001240;	-	STE20-related kinase adaptor beta [Source:MGISymbol;Acc:MGI:2144047]
MGP_C57BL6NJ_G0016452	2204	0	0	0	0	0	0	1	0.0473832	1	0.0478839	0	0	1	61321479	61368187	-	2204	Als2cr11	GO:0003674;GO:0005575;GO:0008150;	-	amyotrophic lateral sclerosis 2 (juvenile)chromosome region, candidate 11 (human) [Source:MGISymbol;Acc:MGI:1920713]
MGP_C57BL6NJ_G0016453	2389	102	3.4699	178	4.84331	390	7.50977	96	4.19654	85	3.75494	86	3.57852	1	61373877	61402578	-	2389	Tmem237	GO:0003674;GO:0005929;GO:0016020;GO:0016020;GO:0016021;GO:0030030;GO:0030111;GO:0030111;GO:0035869;GO:0035869;GO:0042995;GO:0060271;GO:0060271;GO:0030111;GO:0035869;GO:0060271;	K22765	transmembrane protein 237 [Source:MGISymbol;Acc:MGI:2138365]
MGP_C57BL6NJ_G0016454	7089	7	0.0802503	2	0.0183393	6	0.0389354	5	0.0736583	0	0	0	0	1	61403105	61448956	-	7089	Mpp4	GO:0000139;GO:0005102;GO:0005737;GO:0005829;GO:0005913;GO:0005913;GO:0015629;GO:0016328;GO:0032991;GO:0035418;GO:0042734;GO:0042734;GO:0044316;GO:0044317;GO:0045178;	K21109	membrane protein, palmitoylated 4 (MAGUK p55subfamily member 4) [Source:MGI Symbol;Acc:MGI:2386681]
MGP_C57BL6NJ_G0016455	9496	279	2.38779	435	2.97774	635	3.07618	316	3.47522	425	4.72334	301	3.15099	1	61448493	61536759	-	9496	Als2	GO:0001662;GO:0001662;GO:0001726;GO:0001726;GO:0001881;GO:0001881;GO:0005085;GO:0005085;GO:0005089;GO:0005096;GO:0005515;GO:0005634;GO:0005737;GO:0005737;GO:0005769;GO:0005769;GO:0005813;GO:0005813;GO:0005829;GO:0005829;GO:0006979;GO:0006979;GO:0007032;GO:0007041;GO:0007409;GO:0007528;GO:0007528;GO:0007626;GO:0007626;GO:0008104;GO:0008104;GO:0008219;GO:0014069;GO:0014069;GO:0016020;GO:0016050;GO:…	K04575	amyotrophic lateral sclerosis 2 (juvenile)[Source:MGI Symbol;Acc:MGI:1921268]
MGP_C57BL6NJ_G0016456	2483	0	0	8	0.209436	0	0	0	0	9	0.382531	4	0.160142	1	61559502	61653737	+	2483	Cdk15	GO:0000166;GO:0004672;GO:0004674;GO:0004674;GO:0004693;GO:0004693;GO:0005524;GO:0005524;GO:0005634;GO:0005737;GO:0005829;GO:0006468;GO:0006468;GO:0016301;GO:0016310;GO:0016740;GO:0030332;GO:0046872;GO:0051726;	K15594	cyclin-dependent kinase 15 [Source:MGISymbol;Acc:MGI:3583944]
MGP_C57BL6NJ_G0016457	4532	1365	24.478	1295	18.5746	944	9.58209	648	14.9321	423	9.85034	417	9.14675	1	61792437	61796968	+	4532	Fzd7	GO:0004871;GO:0004888;GO:0004930;GO:0004930;GO:0005109;GO:0005515;GO:0005515;GO:0005515;GO:0005546;GO:0005768;GO:0005886;GO:0005886;GO:0005886;GO:0005886;GO:0005886;GO:0005886;GO:0006355;GO:0007165;GO:0007166;GO:0007186;GO:0007275;GO:0010008;GO:0010812;GO:0010812;GO:0010812;GO:0014834;GO:0014834;GO:0016020;GO:0016020;GO:0016021;GO:0016021;GO:0016021;GO:0016055;GO:0016055;GO:0017147;GO:0017147;GO:…	K02432	frizzled class receptor 7 [Source:MGISymbol;Acc:MGI:108570]
MGP_C57BL6NJ_G0016458	5484	0	0	0	0	0	0	0	0	0	0	0	0	1	61829237	61960552	+	5484	Gm973	GO:0003674;GO:0005575;GO:0008150;	-	predicted gene 973 [Source:MGISymbol;Acc:MGI:2685819]
MGP_C57BL6NJ_G0016459	2071	1206	47.3261	1265	39.7054	926	20.5688	1389	70.042	1043	53.1502	1155	55.4399	1	61908523	62000494	-	2071	Sumo1	GO:0001741;GO:0005634;GO:0006355;GO:0008134;GO:0016604;GO:0016925;GO:0030578;GO:0031647;GO:0060021;GO:0086004;GO:0090204;GO:1901896;GO:1903169;	K12160	small ubiquitin-like modifier 1 [Source:MGISymbol;Acc:MGI:1197010]
MGP_C57BL6NJ_G0016460	10734	1283	9.71401	1454	8.80525	207	0.887129	741	7.2093	628	6.17446	663	6.14006	1	62016228	62053650	+	10734	Nop58	-	-	NOP58 ribonucleoprotein [Source:MGISymbol;Acc:MGI:1933184]
MGP_C57BL6NJ_G0016461	18013	6479	29.2318	6453	23.287	681	1.73916	3203	18.5698	3048	17.8579	2766	15.2647	1	62112678	62245009	+	18013	Bmpr2	GO:0000166;GO:0001707;GO:0001707;GO:0001893;GO:0001893;GO:0001935;GO:0001938;GO:0001946;GO:0001946;GO:0001974;GO:0001974;GO:0002063;GO:0003085;GO:0003148;GO:0003151;GO:0003151;GO:0003183;GO:0003186;GO:0003197;GO:0003197;GO:0003252;GO:0003252;GO:0004672;GO:0004674;GO:0004675;GO:0004702;GO:0005024;GO:0005026;GO:0005515;GO:0005524;GO:0005524;GO:0005615;GO:0005654;GO:0005737;GO:0005886;GO:0005886;GO:…	K04671	bone morphogenetic protein receptor, type II(serine/threonine kinase) [Source:MGISymbol;Acc:MGI:1095407]
MGP_C57BL6NJ_G0016462	7290	827	9.21959	1037	9.24677	768	4.84632	512	7.33464	477	6.90544	480	6.54538	1	62281939	62352512	+	7290	Fam117b	GO:0003674;GO:0005737;GO:0008150;	-	family with sequence similarity 117, member B[Source:MGI Symbol;Acc:MGI:1920000]
MGP_C57BL6NJ_G0016463	5356	0	0	18	0.218459	0	0	2	0.0389965	0	0	0	0	1	62349656	62414929	-	5356	Ica1l	GO:0001669;GO:0007286;	K19864	islet cell autoantigen 1-like [Source:MGISymbol;Acc:MGI:1917625]
MGP_C57BL6NJ_G0016464	11859	215	1.47341	414	2.2693	290	1.12494	200	1.76124	176	1.56627	136	1.14002	1	62442114	62479417	-	11859	Wdr12	GO:0000460;GO:0000463;GO:0000463;GO:0000466;GO:0000466;GO:0000470;GO:0005515;GO:0005634;GO:0005634;GO:0005634;GO:0005654;GO:0005654;GO:0005730;GO:0005730;GO:0006364;GO:0007219;GO:0007219;GO:0008283;GO:0008283;GO:0030687;GO:0030687;GO:0030687;GO:0042254;GO:0042254;GO:0042273;GO:0043021;GO:0070545;GO:0070545;GO:0070545;	K14863	WD repeat domain 12 [Source:MGISymbol;Acc:MGI:1927241]
MGP_C57BL6NJ_G0016465	14544	197	1.10082	247	1.10396	57	0.180289	83	0.595979	157	1.13924	133	0.909052	1	62479019	62537014	+	14544	Carf	GO:0000978;GO:0001077;GO:0003677;GO:0003677;GO:0003700;GO:0005634;GO:0005634;GO:0005654;GO:0005730;GO:0006351;GO:0006355;GO:0006355;GO:0006366;GO:0035865;GO:0035865;GO:0045944;GO:0061400;GO:0061400;GO:0071277;GO:0071277;GO:0000978;GO:0001077;GO:0003700;GO:0005634;GO:0005654;GO:0005730;GO:0006355;GO:0045944;	-	calcium response factor [Source:MGISymbol;Acc:MGI:2182269]
MGP_C57BL6NJ_G0016466	28312	1943	5.57745	2200	5.05116	180	0.292469	902	3.32715	1157	4.31284	799	2.80542	1	62579474	62754746	+	28312	Nbeal1	-	-	neurobeachin like 1 [Source:MGISymbol;Acc:MGI:2444343]
MGP_C57BL6NJ_G0016467	2286	298	10.5943	339	9.63967	513	10.3233	158	7.21801	101	4.66279	183	7.95785	1	62761637	62808509	+	2286	Cyp20a1	-	K07435	cytochrome P450, family 20, subfamily a,polypeptide 1 [Source:MGI Symbol;Acc:MGI:1925201]
MGP_C57BL6NJ_G0016468	8543	796	7.57245	791	6.01873	370	1.99237	685	8.37368	529	6.53501	687	7.99406	1	62836025	62912712	+	8543	Abi2	GO:0005515;GO:0005737;GO:0005829;GO:0005829;GO:0005856;GO:0005913;GO:0005913;GO:0007611;GO:0007611;GO:0008154;GO:0016358;GO:0016358;GO:0016477;GO:0016477;GO:0016601;GO:0016601;GO:0017124;GO:0017124;GO:0018108;GO:0030027;GO:0030027;GO:0030027;GO:0030175;GO:0030175;GO:0030296;GO:0030425;GO:0030425;GO:0031209;GO:0031209;GO:0031625;GO:0031625;GO:0032403;GO:0032433;GO:0032433;GO:0042995;GO:0043010;GO:…	K05751	abl-interactor 2 [Source:MGISymbol;Acc:MGI:106913]
MGP_C57BL6NJ_G0016469	20479	4547	18.0447	5264	16.7088	971	2.18117	1789	9.12301	2030	10.4614	1740	8.4462	1	62913846	63006259	-	20479	Raph1	GO:0005515;GO:0005829;GO:0005886;GO:0007165;GO:0016604;GO:0031252;GO:0031252;GO:0048675;GO:0048675;	-	Ras association (RalGDS/AF-6) and pleckstrinhomology domains 1 [Source:MGI Symbol;Acc:MGI:1924550]
MGP_C57BL6NJ_G0016470	6121	179	2.37664	274	2.90983	206	1.54819	373	6.36389	265	4.56903	356	5.78161	1	63157518	63216713	+	6121	Cd28	GO:0001772;GO:0002863;GO:0009897;GO:0014068;GO:0019901;GO:0031295;GO:0042102;GO:0045060;GO:0045086;GO:0045589;GO:0045944;GO:0046641;GO:0048304;GO:0050852;GO:0051897;GO:0097190;	K06470	CD28 antigen [Source:MGI Symbol;Acc:MGI:88327]"
MGP_C57BL6NJ_G0016471	2330	0	0	0	0	0	0	6	0.268925	13	0.588828	0	0	1	63347104	63379047	+	2330	Ctla4	-	K06538	cytotoxic T-lymphocyte-associated protein 4[Source:MGI Symbol;Acc:MGI:88556]
MGP_C57BL6NJ_G0016472	3429	2	0.0474019	0	0	0	0	22	0.670026	50	1.53887	27	0.782739	1	63447502	63468881	+	3429	Icos	GO:0002517;GO:0005515;GO:0005515;GO:0005887;GO:0005887;GO:0009897;GO:0009897;GO:0016020;GO:0016021;GO:0031295;GO:0098609;	K06713	inducible T cell co-stimulator [Source:MGISymbol;Acc:MGI:1858745]
MGP_C57BL6NJ_G0016473	13150	87	0.537684	75	0.370744	15	0.0524739	17	0.135008	32	0.256818	22	0.16631	1	64138230	65170381	+	13150	Pard3b	-	-	par-3 family cell polarity regulator beta[Source:MGI Symbol;Acc:MGI:1919301]
MGP_C57BL6NJ_G0016474	11736	23720	164.259	28365	157.109	32679	128.093	20187	179.634	21243	191.028	19357	163.96	1	65236528	65366416	+	11736	Nrp2	GO:0001755;GO:0001764;GO:0003148;GO:0007411;GO:0007507;GO:0017154;GO:0021612;GO:0021649;GO:0021675;GO:0021828;GO:0030424;GO:0036486;GO:0048846;GO:0050919;GO:0061549;GO:0061551;GO:0097374;GO:0097490;GO:0097491;GO:1901166;GO:1902285;GO:1903375;GO:1904835;GO:1990830;	K06819	neuropilin 2 [Source:MGI Symbol;Acc:MGI:1100492]"
MGP_C57BL6NJ_G0016475	12504	1570	10.2043	1411	7.33528	339	1.24718	921	7.69214	1299	10.9638	812	6.45547	1	65508685	65679278	-	12504	Ino80d	-	K11668	INO80 complex subunit D [Source:MGISymbol;Acc:MGI:3027003]
MGP_C57BL6NJ_G0016476	8067	1154	11.6259	1441	11.6116	3048	17.3813	567	7.34019	647	8.46434	433	5.33577	1	65715909	65752971	-	8067	Ndufs1	GO:0005739;GO:0043209;	K03934	NADH dehydrogenase (ubiquinone) Fe-S protein 1[Source:MGI Symbol;Acc:MGI:2443241]
MGP_C57BL6NJ_G0016477	2532	1078	34.601	1853	47.5719	2123	38.5713	571	23.551	557	23.2163	614	24.106	1	65752963	65757637	+	2532	Eef1b2	GO:0003746;GO:0003746;GO:0003746;GO:0005515;GO:0005737;GO:0005783;GO:0005853;GO:0005853;GO:0006412;GO:0006414;GO:0006414;GO:0016020;GO:0016021;GO:0045471;	K03232	eukaryotic translation elongation factor 1 beta 2[Source:MGI Symbol;Acc:MGI:1929520]
MGP_C57BL6NJ_G0016478	2496	0	0	0	0	0	0	0	0	0	0	0	0	1	65759842	65799989	-	2496	Gpr1	GO:0004871;GO:0004930;GO:0004930;GO:0004930;GO:0005654;GO:0005886;GO:0005886;GO:0005887;GO:0007165;GO:0007186;GO:0007186;GO:0007187;GO:0007218;GO:0007268;GO:0016020;GO:0016021;GO:0016021;GO:0042923;GO:0043005;GO:0043231;	K04310	G protein-coupled receptor 1 [Source:MGISymbol;Acc:MGI:2385324]
MGP_C57BL6NJ_G0016479	12512	2	0.0129908	0	0	0	0	0	0	0	0	2	0.01589	1	65861407	65909433	+	12512	Zdbf2	GO:0003674;GO:0005575;GO:0008150;	-	zinc finger, DBF-type containing 2 [Source:MGISymbol;Acc:MGI:1921134]
MGP_C57BL6NJ_G0016480	17904	524	2.37856	660	2.39625	4	0.0102775	78	0.454968	31	0.182731	15	0.0832841	1	66058416	66224595	+	17904	Adam23	GO:0004222;GO:0005515;GO:0005515;GO:0005576;GO:0005886;GO:0006508;GO:0007155;GO:0008237;GO:0016020;GO:0016021;GO:1990830;GO:1990830;	K06837	a disintegrin and metallopeptidase domain 23[Source:MGI Symbol;Acc:MGI:1345162]
MGP_C57BL6NJ_G0016481	6143	0	0	0	0	0	0	0	0	0	0	0	0	1	66259008	66326071	-	6143	Dytn	GO:0003674;GO:0005575;GO:0005886;GO:0008150;GO:0008270;GO:0016020;GO:0046872;	-	dystrotelin [Source:MGI Symbol;Acc:MGI:2685061]"
MGP_C57BL6NJ_G0016482	1719	0	0	0	0	0	0	0	0	0	0	1	0.0578289	1	66336916	66368425	-	1719	Mdh1b	GO:0003824;GO:0005737;GO:0005975;GO:0006099;GO:0006099;GO:0006107;GO:0006108;GO:0006108;GO:0006734;GO:0016491;GO:0016615;GO:0016616;GO:0030060;GO:0055114;GO:0055114;	-	malate dehydrogenase 1B, NAD (soluble) [Source:MGISymbol;Acc:MGI:1923918]
MGP_C57BL6NJ_G0016483	5722	394	5.59605	340	3.86251	360	2.89423	225	4.10649	249	4.59253	220	3.82204	1	66368721	66397192	+	5722	Fastkd2	GO:0003723;GO:0003723;GO:0004672;GO:0005634;GO:0005739;GO:0005739;GO:0005739;GO:0006468;GO:0019843;GO:0019843;GO:0035770;GO:0035770;GO:0042254;GO:0042645;GO:0042645;GO:0045171;GO:0045333;GO:0070131;GO:0070131;GO:1902775;GO:1902775;	K18190	FAST kinase domains 2 [Source:MGISymbol;Acc:MGI:1922869]
MGP_C57BL6NJ_G0016484	1758	0	0	0	0	0	0	0	0	0	0	0	0	1	66397444	66411887	-	1758	4933402D24Rik	GO:0003674;GO:0005575;GO:0008150;	-	RIKEN cDNA 4933402D24 gene [Source:MGISymbol;Acc:MGI:1921676]
MGP_C57BL6NJ_G0016485	8131	1224	12.2341	1316	10.5208	342	1.93491	558	7.16682	716	9.2933	511	6.24738	1	66684264	66778548	-	8131	Klf7	GO:0000978;GO:0000981;GO:0001077;GO:0003676;GO:0003677;GO:0003677;GO:0003677;GO:0003700;GO:0003700;GO:0005634;GO:0005634;GO:0006351;GO:0006355;GO:0006357;GO:0006366;GO:0007409;GO:0007409;GO:0007411;GO:0007411;GO:0045893;GO:0045893;GO:0045944;GO:0046872;GO:0048813;GO:0048813;	K09207	Kruppel-like factor 7 (ubiquitous) [Source:MGISymbol;Acc:MGI:1935151]
MGP_C57BL6NJ_G0016486	13892	1320	7.72223	1500	7.01884	307	1.0166	1245	9.35925	1265	9.61007	1294	9.25956	1	67211120	67288891	+	13892	Creb1	GO:0000785;GO:0000790;GO:0000790;GO:0000790;GO:0000978;GO:0000980;GO:0001102;GO:0001190;GO:0001225;GO:0001228;GO:0003677;GO:0003677;GO:0003677;GO:0003690;GO:0003700;GO:0003700;GO:0003705;GO:0005515;GO:0005515;GO:0005634;GO:0005634;GO:0005634;GO:0005654;GO:0005654;GO:0005667;GO:0005667;GO:0005719;GO:0005739;GO:0005759;GO:0006351;GO:0006355;GO:0006355;GO:0006355;GO:0006366;GO:0006468;GO:0007179;GO:…	-	cAMP responsive element binding protein 1[Source:MGI Symbol;Acc:MGI:88494]
MGP_C57BL6NJ_G0016487	3005	45	1.21703	167	3.61252	285	4.36293	36	1.25111	56	1.96673	63	2.08409	1	67290816	67302921	-	3005	Mettl21a	GO:0005737;GO:0006479;GO:0006479;GO:0008168;GO:0008276;GO:0016279;GO:0016279;GO:0016740;GO:0018022;GO:0030544;GO:0031072;GO:0032259;GO:0032991;GO:0043234;GO:0051117;	K21804	methyltransferase like 21A [Source:MGISymbol;Acc:MGI:1914349]
MGP_C57BL6NJ_G0016488	3579	353	8.01579	417	7.57379	115	1.47814	189	5.51489	224	6.60522	119	3.30526	1	67377278	67416534	+	3579	Ccnyl1	GO:0000079;GO:0001932;GO:0001932;GO:0005515;GO:0005515;GO:0005886;GO:0005886;GO:0005886;GO:0007283;GO:0007283;GO:0016020;GO:0016020;GO:0016538;GO:0019901;GO:0030317;GO:0030317;GO:0045737;GO:0045859;GO:0045859;	-	cyclin Y-like 1 [Source:MGISymbol;Acc:MGI:2138614]
MGP_C57BL6NJ_G0016489	6915	254	2.98521	368	3.45935	235	1.56334	73	1.10247	65	0.992024	78	1.1213	1	67422214	67429407	-	6915	Fzd5	GO:0000139;GO:0000578;GO:0001525;GO:0001525;GO:0001525;GO:0001540;GO:0001944;GO:0001944;GO:0002726;GO:0004871;GO:0004888;GO:0004930;GO:0004930;GO:0005515;GO:0005515;GO:0005515;GO:0005769;GO:0005769;GO:0005794;GO:0005794;GO:0005794;GO:0005886;GO:0005886;GO:0005886;GO:0005886;GO:0005887;GO:0005923;GO:0005923;GO:0007165;GO:0007166;GO:0007186;GO:0007275;GO:0008285;GO:0008285;GO:0008289;GO:0008595;GO:…	K02375	frizzled class receptor 5 [Source:MGISymbol;Acc:MGI:108571]
MGP_C57BL6NJ_G0016490	10951	1691	12.5494	1887	11.201	2845	11.9511	1117	10.6521	1539	14.8315	1254	11.3832	1	67484036	67658902	-	10951	Plekhm3	GO:0003674;GO:0005515;GO:0005575;GO:0005737;GO:0005794;GO:0005886;GO:0008150;GO:0016020;GO:0045445;GO:0046872;GO:0005737;GO:0005794;GO:0005886;GO:0045445;	-	pleckstrin homology domain containing, family M,member 3 [Source:MGI Symbol;Acc:MGI:2443627]
MGP_C57BL6NJ_G0016491	4209	0	0	0	0	0	0	0	0	0	0	1	0.0236179	1	67718444	67746074	-	4209	Akr1cl	GO:0003674;GO:0004032;GO:0005575;GO:0008106;GO:0008150;GO:0008202;GO:0016229;GO:0016491;GO:0016491;GO:0047086;GO:0055114;	-	aldo-keto reductase family 1, member C-like[Source:MGI Symbol;Acc:MGI:1918111]
MGP_C57BL6NJ_G0016492	646	0	0	0	0	0	0	0	0	0	0	0	0	1	67766634	67770385	-	646	Cryge	GO:0001654;GO:0001654;GO:0002088;GO:0002088;GO:0005212;	-	crystallin, gamma E [Source:MGISymbol;Acc:MGI:88525]
MGP_C57BL6NJ_G0016493	615	0	0	0	0	0	0	0	0	0	0	0	0	1	67783981	67784687	-	615	-	-	#N/A	-
MGP_C57BL6NJ_G0016494	786	0	0	0	0	0	0	0	0	0	0	0	0	1	67792635	67794799	-	786	Crygc	GO:0001654;GO:0005212;GO:0005212;GO:0005212;GO:0005634;GO:0005737;GO:0007601;GO:0007601;GO:0043010;	-	crystallin, gamma C [Source:MGISymbol;Acc:MGI:88523]
MGP_C57BL6NJ_G0016495	634	0	0	0	0	0	0	0	0	0	0	0	0	1	67801284	67803353	-	634	Crygb	GO:0001654;GO:0001654;GO:0002088;GO:0002088;GO:0005212;GO:0005212;GO:0005212;GO:0005634;GO:0005634;GO:0005737;GO:0005737;GO:0070307;GO:0070307;GO:0070309;GO:0070309;	-	crystallin, gamma B [Source:MGISymbol;Acc:MGI:88522]
MGP_C57BL6NJ_G0016496	730	0	0	0	0	0	0	0	0	0	0	0	0	1	67818143	67820707	-	730	Cryga	GO:0001654;GO:0002088;	-	crystallin, gamma A [Source:MGISymbol;Acc:MGI:88521]
MGP_C57BL6NJ_G0016497	733	0	0	0	0	0	0	0	0	0	0	0	0	1	67818373	67836139	-	733	Gm28845	-	-	predicted gene 28845 [Source:MGISymbol;Acc:MGI:5579551]
MGP_C57BL6NJ_G0016498	2665	3	0.0914866	2	0.0487833	5	0.086308	4	0.156747	0	0	0	0	1	67822619	67839632	-	2665	D630023F18Rik	GO:0003674;GO:0005575;GO:0008150;	-	RIKEN cDNA D630023F18 gene [Source:MGISymbol;Acc:MGI:2138198]
MGP_C57BL6NJ_G0016499	2771	1467	43.0256	2301	53.9783	3068	50.9327	1687	63.5792	1360	51.7968	2035	73.0044	1	67879085	67910344	-	2771	Idh1	GO:0000287;GO:0000287;GO:0000287;GO:0004448;GO:0004448;GO:0004450;GO:0004450;GO:0004450;GO:0004450;GO:0004450;GO:0005102;GO:0005737;GO:0005737;GO:0005739;GO:0005739;GO:0005777;GO:0005777;GO:0005829;GO:0005829;GO:0005829;GO:0005829;GO:0006097;GO:0006099;GO:0006102;GO:0006102;GO:0006102;GO:0006102;GO:0006103;GO:0006103;GO:0006739;GO:0006749;GO:0006749;GO:0006979;GO:0006979;GO:0014070;GO:0016491;GO:…	K00031	isocitrate dehydrogenase 1 (NADP+), soluble[Source:MGI Symbol;Acc:MGI:96413]
MGP_C57BL6NJ_G0016500	18505	2039	8.95492	2687	9.43881	998	2.48096	1601	9.03522	2266	12.9232	1730	9.29347	1	67910533	68023216	+	18505	Pikfyve	GO:0005829;GO:0005911;GO:0008270;GO:0012506;GO:0016308;GO:0031410;GO:0032288;GO:0035556;GO:0048471;	-	phosphoinositide kinase, FYVE finger containing[Source:MGI Symbol;Acc:MGI:1335106]
MGP_C57BL6NJ_G0016501	2582	9	0.283283	0	0	0	0	0	0	0	0	0	0	1	68026577	68147627	+	2582	Pth2r	GO:0004871;GO:0004888;GO:0004930;GO:0004930;GO:0004991;GO:0004991;GO:0005886;GO:0007165;GO:0007166;GO:0007186;GO:0007186;GO:0008528;GO:0016020;GO:0016020;GO:0016021;GO:0016021;GO:0017046;GO:0120162;GO:0120162;	-	parathyroid hormone 2 receptor [Source:MGISymbol;Acc:MGI:2180917]
MGP_C57BL6NJ_G0016502	627	0	0	0	0	0	0	0	0	0	0	0	0	1	68722124	68723990	+	627	Crygf	GO:0001654;GO:0001654;GO:0005212;	-	crystallin, gamma F [Source:MGISymbol;Acc:MGI:88526]
MGP_C57BL6NJ_G0016503	16449	19	0.0938745	26	0.102748	0	0	0	0	14	0.0898234	0	0	1	68984271	69265793	+	16449	-	-	-	-
MGP_C57BL6NJ_G0016504	15143	0	0	0	0	0	0	0	0	2	0.0139386	0	0	1	69291928	69545455	+	15143	Unc80	GO:0005515;	-	unc-80, NALCN activator [Source:MGISymbol;Acc:MGI:2652882]
MGP_C57BL6NJ_G0016505	3113	702	18.327	937	19.5659	733	10.8319	434	14.5595	516	17.4933	436	13.9229	1	69547283	69565032	+	3113	Rpe	GO:0003824;GO:0004750;GO:0004750;GO:0004750;GO:0004750;GO:0005829;GO:0005975;GO:0005975;GO:0005975;GO:0006098;GO:0006098;GO:0006098;GO:0008152;GO:0009052;GO:0009052;GO:0016020;GO:0016021;GO:0016853;GO:0016857;GO:0019323;GO:0030246;GO:0042802;GO:0042803;GO:0043231;GO:0044262;GO:0046872;GO:0046872;GO:0046872;GO:0048029;GO:0070062;	-	ribulose-5-phosphate-3-epimerase [Source:MGISymbol;Acc:MGI:1913896]
MGP_C57BL6NJ_G0016506	6549	431	5.34855	444	4.40704	50	0.351215	255	4.06632	370	5.96249	248	3.76442	1	69564590	69667242	-	6549	Kansl1l	GO:0000123;GO:0008150;GO:0035035;GO:0044545;	-	KAT8 regulatory NSL complex subunit 1-like[Source:MGI Symbol;Acc:MGI:1915941]
MGP_C57BL6NJ_G0016507	2005	2796	113.333	3046	98.7539	4753	109.052	2173	113.183	2057	108.273	2606	129.205	1	69680486	69711361	-	2005	Acadl	GO:0003995;GO:0004466;GO:0008152;GO:0016491;GO:0016627;GO:0042758;GO:0050660;GO:0050660;GO:0055114;GO:0055114;	K00255	acyl-Coenzyme A dehydrogenase, long-chain[Source:MGI Symbol;Acc:MGI:87866]
MGP_C57BL6NJ_G0016508	2074	0	0	0	0	0	0	0	0	0	0	0	0	1	69786132	69807600	-	2074	Myl1	GO:0005509;GO:0006936;GO:0016459;GO:0030016;GO:0043292;GO:0060048;	K05738	myosin, light polypeptide 1 [Source:MGISymbol;Acc:MGI:97269]
MGP_C57BL6NJ_G0016509	6863	181	2.14337	263	2.49104	1038	6.95763	123	1.87166	147	2.2605	126	1.82506	1	69865627	69907844	-	6863	Lancl1	GO:0003824;GO:0005737;GO:0005886;GO:0005886;GO:0007165;GO:0008270;GO:0008270;GO:0016020;GO:0017124;GO:0043295;GO:0043295;GO:0046872;GO:0050750;GO:0070062;	-	LanC (bacterial lantibiotic synthetase componentC)-like 1 [Source:MGI Symbol;Acc:MGI:1336997]
MGP_C57BL6NJ_G0016510	5555	9	0.131672	0	0	0	0	2	0.0375995	3	0.0569952	1	0.0178952	1	69998013	70113739	+	5555	Cps1	GO:0000050;GO:0000050;GO:0000050;GO:0000166;GO:0003824;GO:0003824;GO:0004070;GO:0004087;GO:0004087;GO:0004087;GO:0004087;GO:0004088;GO:0004088;GO:0004151;GO:0004175;GO:0005509;GO:0005515;GO:0005524;GO:0005524;GO:0005524;GO:0005543;GO:0005634;GO:0005730;GO:0005730;GO:0005737;GO:0005737;GO:0005739;GO:0005739;GO:0005739;GO:0005743;GO:0006207;GO:0006207;GO:0006508;GO:0006526;GO:0006541;GO:0006541;GO:…	K01948	carbamoyl-phosphate synthetase 1 [Source:MGISymbol;Acc:MGI:891996]
MGP_C57BL6NJ_G0016511	12396	0	0	0	0	0	0	0	0	0	0	0	0	1	70936626	72120913	-	12396	Erbb4	GO:0000166;GO:0001755;GO:0001755;GO:0004672;GO:0004713;GO:0004713;GO:0004713;GO:0004713;GO:0004713;GO:0004714;GO:0004714;GO:0004714;GO:0004714;GO:0004716;GO:0004888;GO:0005154;GO:0005154;GO:0005515;GO:0005524;GO:0005524;GO:0005634;GO:0005634;GO:0005737;GO:0005737;GO:0005739;GO:0005739;GO:0005886;GO:0005886;GO:0005887;GO:0005901;GO:0006351;GO:0006355;GO:0006468;GO:0006915;GO:0007165;GO:0007169;GO:…	K05085	erb-b2 receptor tyrosine kinase 4 [Source:MGISymbol;Acc:MGI:104771]
MGP_C57BL6NJ_G0016512	4828	65	1.09416	126	1.69645	5	0.047641	44	0.951748	53	1.15854	32	0.658876	1	72578173	72740157	-	4828	Ikzf2	GO:0000122;GO:0003676;GO:0003677;GO:0003700;GO:0005634;GO:0005634;GO:0005634;GO:0005654;GO:0006351;GO:0006355;GO:0042803;GO:0042803;GO:0044212;GO:0045944;GO:0045944;GO:0045944;GO:0046872;GO:0046982;GO:0046982;	K09220	IKAROS family zinc finger 2 [Source:MGISymbol;Acc:MGI:1342541]
MGP_C57BL6NJ_G0016513	6764	0	0	0	0	0	0	0	0	0	0	0	0	1	72886704	73858830	+	6764	Spag16	GO:0005634;GO:0005737;GO:0005930;GO:0007288;GO:0051012;GO:0060271;GO:0060294;GO:0097231;GO:1990716;	-	sperm associated antigen 16 [Source:MGISymbol;Acc:MGI:1913972]
MGP_C57BL6NJ_G0016514	7689	0	0	0	0	0	0	0	0	0	0	0	0	1	73859413	74036426	+	7689	Vwc2l	GO:0003674;GO:0005576;GO:0005615;GO:0005615;GO:0007275;GO:0030054;GO:0030514;GO:0030514;GO:0032281;GO:0032281;GO:0045202;GO:0045666;GO:0045666;	-	von Willebrand factor C domain-containing protein2-like [Source:MGI Symbol;Acc:MGI:2444069]
MGP_C57BL6NJ_G0016515	5650	92	1.32334	83	0.954923	11	0.0895617	160	2.95739	167	3.11938	156	2.74471	1	74190212	74262234	-	5650	Bard1	GO:0003723;GO:0004842;GO:0004842;GO:0005634;GO:0005634;GO:0005634;GO:0005737;GO:0005737;GO:0006281;GO:0006974;GO:0016567;GO:0016567;GO:0016607;GO:0016740;GO:0031436;GO:0031436;GO:0031436;GO:0036464;GO:0042325;GO:0042325;GO:0042803;GO:0042803;GO:0043065;GO:0043065;GO:0043065;GO:0043066;GO:0043066;GO:0046826;GO:0046826;GO:0046872;GO:0046982;GO:0046982;GO:0070531;GO:0085020;GO:0085020;	K10683	BRCA1 associated RING domain 1 [Source:MGISymbol;Acc:MGI:1328361]
MGP_C57BL6NJ_G0016516	14683	0	0	0	0	0	0	0	0	0	0	0	0	1	74413759	74595806	-	14683	Abca12	GO:0000166;GO:0005102;GO:0005215;GO:0005319;GO:0005515;GO:0005524;GO:0005524;GO:0005737;GO:0005743;GO:0005743;GO:0005829;GO:0005829;GO:0005886;GO:0006869;GO:0006869;GO:0006869;GO:0010875;GO:0010875;GO:0016020;GO:0016021;GO:0016021;GO:0016887;GO:0030216;GO:0030216;GO:0031424;GO:0031424;GO:0032940;GO:0033700;GO:0034191;GO:0035627;GO:0035627;GO:0042626;GO:0042626;GO:0043129;GO:0043129;GO:0043231;GO:…	K05646	ATP-binding cassette, sub-family A (ABC1), member12 [Source:MGI Symbol;Acc:MGI:2676312]
MGP_C57BL6NJ_G0016517	7985	1243	12.6511	1632	13.2857	2824	16.2693	838	10.9599	766	10.1241	893	11.1173	1	74745066	74767811	+	7985	Atic	GO:0003824;GO:0003824;GO:0003937;GO:0003937;GO:0003937;GO:0004643;GO:0004643;GO:0004643;GO:0005739;GO:0005739;GO:0005829;GO:0005886;GO:0006164;GO:0006164;GO:0006189;GO:0006189;GO:0008152;GO:0009116;GO:0009259;GO:0016020;GO:0016740;GO:0016787;GO:0042803;GO:0042803;GO:0045296;GO:0046452;GO:0046654;GO:0070062;	K00602	5-aminoimidazole-4-carboxamide ribonucleotideformyltransferase/IMP cyclohydrolase [Source:MGISymbol;Acc:MGI:1351352]
MGP_C57BL6NJ_G0016518	11690	45136	313.792	64432	358.283	373	1.46782	4578	40.8976	1286	11.6099	909	7.72984	1	74773795	74846666	-	11690	Fn1	GO:0001525;GO:0001775;GO:0001932;GO:0002020;GO:0005102;GO:0005178;GO:0005201;GO:0005515;GO:0005515;GO:0005576;GO:0005576;GO:0005576;GO:0005577;GO:0005578;GO:0005578;GO:0005604;GO:0005605;GO:0005615;GO:0005615;GO:0005793;GO:0006953;GO:0007044;GO:0007155;GO:0007155;GO:0007160;GO:0007161;GO:0008022;GO:0008201;GO:0008284;GO:0008347;GO:0008360;GO:0010628;GO:0010952;GO:0016324;GO:0016504;GO:0018149;GO:…	K05717	fibronectin 1 [Source:MGI Symbol;Acc:MGI:95566]"
MGP_C57BL6NJ_G0016519	2603	36	1.12399	44	1.0988	376	6.64495	10	0.401201	24	0.973056	31	1.18388	1	75449966	75508873	-	2603	Mreg	GO:0005515;GO:0005886;GO:0016020;GO:0016324;GO:0030318;GO:0030318;GO:0030318;GO:0032402;GO:0032402;GO:0032402;GO:0032402;GO:0032991;GO:0032991;GO:0042470;GO:0042470;GO:0042470;GO:0042470;GO:0043234;GO:0043234;GO:0043473;GO:0043473;GO:0048066;GO:0048066;	-	melanoregulin [Source:MGI Symbol;Acc:MGI:2151839]"
MGP_C57BL6NJ_G0016520	1464	0	0	21	0.932432	107	3.36218	14	0.998673	20	1.44175	9	0.611114	1	75576366	75602947	-	1464	Pecr	GO:0005102;GO:0005739;GO:0005739;GO:0005777;GO:0005777;GO:0005777;GO:0005778;GO:0006629;GO:0006631;GO:0006633;GO:0016491;GO:0019166;GO:0019166;GO:0019166;GO:0030497;GO:0033306;GO:0033306;GO:0043231;GO:0055114;GO:0055114;GO:0055114;GO:0005739;	-	peroxisomal trans-2-enoyl-CoA reductase [Source:MGISymbol;Acc:MGI:2148199]
MGP_C57BL6NJ_G0016521	3054	0	0	0	0	0	0	0	0	0	0	3	0.0976502	1	75603002	75623347	+	3054	Tmem169	GO:0003674;GO:0005575;GO:0008150;GO:0016020;GO:0016021;	-	transmembrane protein 169 [Source:MGISymbol;Acc:MGI:2442781]
MGP_C57BL6NJ_G0016522	2848	97	2.76799	176	4.01709	166	2.68131	27	0.990057	8	0.29645	25	0.872611	1	75627664	75719699	+	2848	Xrcc5	GO:0000166;GO:0000723;GO:0000723;GO:0000784;GO:0000784;GO:0002218;GO:0002376;GO:0003677;GO:0003677;GO:0003684;GO:0003690;GO:0003691;GO:0003723;GO:0003723;GO:0004003;GO:0004386;GO:0005515;GO:0005524;GO:0005634;GO:0005634;GO:0005634;GO:0005634;GO:0005654;GO:0005694;GO:0005730;GO:0005737;GO:0005737;GO:0005886;GO:0006281;GO:0006302;GO:0006302;GO:0006303;GO:0006303;GO:0006303;GO:0006303;GO:0006310;GO:…	K10885	X-ray repair complementing defective repair inChinese hamster cells 5 [Source:MGISymbol;Acc:MGI:104517]
MGP_C57BL6NJ_G0016523	4553	0	0	0	0	0	0	0	0	0	0	2	0.043667	1	75755238	75874247	-	4553	43528	GO:0000139;GO:0004842;GO:0004842;GO:0005794;GO:0005795;GO:0005795;GO:0005802;GO:0005802;GO:0008270;GO:0016020;GO:0016021;GO:0016567;GO:0016740;GO:0046872;	K10659	membrane-associated ring finger (C3HC4) 4[Source:MGI Symbol;Acc:MGI:2683550]
MGP_C57BL6NJ_G0016524	5728	160	2.27013	269	3.05273	343	2.75467	67	1.22154	122	2.2478	123	2.13463	1	75921559	75977070	+	5728	Smarcal1	GO:0008094;	K14440	SWI/SNF related matrix associated, actin dependentregulator of chromatin, subfamily a-like 1 [Source:MGISymbol;Acc:MGI:1859183]
MGP_C57BL6NJ_G0016525	4573	0	0	0	0	0	0	1	0.0228368	0	0	0	0	1	75988023	76056308	-	4573	Ankar	GO:0005634;GO:0005737;GO:0016020;GO:0016021;	-	ankyrin and armadillo repeat containing [Source:MGISymbol;Acc:MGI:2442559]
MGP_C57BL6NJ_G0016526	584	812	113	1032	114.87	9910	780.619	572	102.287	498	89.9948	733	124.771	1	76073205	76075754	+	584	Rpl37a	GO:0003723;GO:0003735;GO:0005622;GO:0005634;GO:0005840;GO:0005840;GO:0005925;GO:0006412;GO:0022625;GO:0030529;GO:0046872;GO:0070062;GO:0070180;	K02921	ribosomal protein L37a [Source:MGISymbol;Acc:MGI:98068]
MGP_C57BL6NJ_G0016527	1637	16	0.794337	19	0.754473	0	0	0	0	0	0	0	0	1	76203355	76234032	+	1637	Igfbp2	GO:0001558;GO:0005520;GO:0005520;GO:0005520;GO:0005576;GO:0005576;GO:0005576;GO:0005615;GO:0005615;GO:0005615;GO:0005615;GO:0016324;GO:0019838;GO:0031410;GO:0031994;GO:0031994;GO:0031994;GO:0031995;GO:0031995;GO:0031995;GO:0040008;GO:0042104;GO:0042104;GO:0043567;GO:0043567;GO:0070062;	-	insulin-like growth factor binding protein 2[Source:MGI Symbol;Acc:MGI:96437]
MGP_C57BL6NJ_G0016528	6006	318	4.30304	435	4.70807	0	0	30	0.521642	9	0.158146	8	0.132411	1	76239470	76256429	-	6006	Igfbp5	GO:0001558;GO:0001558;GO:0001558;GO:0001649;GO:0001649;GO:0001968;GO:0001968;GO:0001968;GO:0005520;GO:0005520;GO:0005576;GO:0005576;GO:0005615;GO:0005622;GO:0006006;GO:0006006;GO:0007565;GO:0007565;GO:0010906;GO:0010906;GO:0014912;GO:0016942;GO:0017148;GO:0019838;GO:0030336;GO:0031069;GO:0031069;GO:0031994;GO:0031994;GO:0031994;GO:0031995;GO:0040008;GO:0040008;GO:0042567;GO:0042567;GO:0042593;GO:…	-	insulin-like growth factor binding protein 5[Source:MGI Symbol;Acc:MGI:96440]
MGP_C57BL6NJ_G0016529	437	1	0.185974	0	0	0	0	0	0	1	0.241501	0	0	1	76411197	76412032	-	437	Tnp1	GO:0000012;GO:0000786;GO:0000786;GO:0000786;GO:0000788;GO:0000788;GO:0001673;GO:0001673;GO:0003677;GO:0003677;GO:0003677;GO:0005634;GO:0005634;GO:0005634;GO:0005634;GO:0005694;GO:0006337;GO:0006338;GO:0006338;GO:0006342;GO:0007275;GO:0007283;GO:0007283;GO:0007283;GO:0007283;GO:0007286;GO:0007290;GO:0007290;GO:0010954;GO:0010954;GO:0019953;GO:0030154;GO:0030317;GO:0035093;GO:0035093;GO:0045892;	-	transition protein 1 [Source:MGISymbol;Acc:MGI:98784]
MGP_C57BL6NJ_G0016530	15940	1333	6.79634	2616	10.6681	3073	8.86855	457	2.99409	366	2.42322	526	3.28034	1	77387823	77609734	-	15940	Tns1	GO:0003723;GO:0003779;GO:0005622;GO:0005925;GO:0005925;GO:0007044;GO:0007044;GO:0010761;GO:0010761;GO:0030055;GO:0030055;GO:0035556;	K18080	tensin 1 [Source:MGI Symbol;Acc:MGI:104552]"
MGP_C57BL6NJ_G0016531	1692	193	9.27023	515	19.7854	712	19.3579	35	2.16025	3	0.187121	0	0	1	77612995	77638551	+	1692	Rufy4	GO:0000045;GO:0003674;GO:0005515;GO:0005575;GO:0005776;GO:0008150;GO:0016239;GO:0032266;GO:0046872;GO:0071353;GO:0071353;	-	RUN and FYVE domain containing 4 [Source:MGISymbol;Acc:MGI:3588214]
MGP_C57BL6NJ_G0016532	3046	3	0.0800433	5	0.106704	0	0	3	0.102856	9	0.311827	4	0.130542	1	77644794	77653407	+	3046	Cxcr2	GO:0002438;GO:0002690;GO:0004871;GO:0004871;GO:0004918;GO:0004930;GO:0004930;GO:0004930;GO:0004950;GO:0005515;GO:0005622;GO:0005886;GO:0006935;GO:0006935;GO:0006935;GO:0006935;GO:0006955;GO:0006968;GO:0007165;GO:0007165;GO:0007166;GO:0007186;GO:0007186;GO:0007200;GO:0007204;GO:0007204;GO:0008284;GO:0009897;GO:0009986;GO:0010666;GO:0016020;GO:0016020;GO:0016021;GO:0016021;GO:0016493;GO:0016494;GO:…	K05050	chemokine (C-X-C motif) receptor 2 [Source:MGISymbol;Acc:MGI:105303]
MGP_C57BL6NJ_G0016533	1491	0	0	0	0	34	1.04901	0	0	0	0	0	0	1	77683995	77686841	-	1491	Cxcr1	GO:0004871;GO:0004918;GO:0004930;GO:0004930;GO:0005622;GO:0005886;GO:0006935;GO:0006935;GO:0006935;GO:0006955;GO:0007165;GO:0007166;GO:0007186;GO:0007186;GO:0007204;GO:0009897;GO:0016020;GO:0016021;GO:0016021;GO:0016493;GO:0016494;GO:0019722;GO:0019956;GO:0019957;GO:0019959;GO:0030593;GO:0031623;GO:0038112;GO:0060326;GO:0070098;	K04175	chemokine (C-X-C motif) receptor 1 [Source:MGISymbol;Acc:MGI:2448715]
MGP_C57BL6NJ_G0016534	2033	9142	365.458	9879	315.874	19399	438.955	5969	306.62	6142	318.84	5488	268.348	1	77731682	77763634	+	2033	Arpc2	GO:0003779;GO:0005200;GO:0005200;GO:0005515;GO:0005737;GO:0005737;GO:0005768;GO:0005856;GO:0005885;GO:0005885;GO:0005885;GO:0005886;GO:0005925;GO:0009986;GO:0010592;GO:0014911;GO:0015629;GO:0030027;GO:0030041;GO:0030054;GO:0030141;GO:0030426;GO:0030833;GO:0030838;GO:0031252;GO:0031941;GO:0032587;GO:0034314;GO:0034314;GO:0034314;GO:0035254;GO:0036120;GO:0036195;GO:0042995;GO:0043005;GO:0043197;GO:…	-	actin related protein 2/3 complex, subunit 2[Source:MGI Symbol;Acc:MGI:1923959]
MGP_C57BL6NJ_G0016535	1075	0	0	0	0	0	0	0	0	0	0	0	0	1	77773968	77775042	+	1075	Gpbar1	GO:0004871;GO:0004930;GO:0004930;GO:0004930;GO:0005737;GO:0005886;GO:0005886;GO:0007165;GO:0007186;GO:0007186;GO:0016020;GO:0016021;GO:0016021;GO:0038181;GO:0038183;GO:2000810;GO:2000810;	K08400	G protein-coupled bile acid receptor 1 [Source:MGISymbol;Acc:MGI:2653863]
MGP_C57BL6NJ_G0016536	3458	645	15.1589	1284	24.1368	3536	47.0398	487	14.7076	533	16.2668	577	16.5871	1	77775258	77780156	-	3458	Aamp	GO:0005829;GO:0008201;GO:0009986;GO:0015630;GO:0030687;GO:0042273;GO:0045171;GO:0051082;	-	angio-associated migratory protein [Source:MGISymbol;Acc:MGI:107809]
MGP_C57BL6NJ_G0016537	7832	104	1.07918	278	2.30734	497	2.91919	44	0.5867	38	0.512049	56	0.710782	1	77780348	77859412	+	7832	Pnkd	GO:0004416;GO:0005515;GO:0005634;GO:0005737;GO:0005739;GO:0005739;GO:0016020;GO:0016020;GO:0016021;GO:0016787;GO:0019243;GO:0032225;GO:0042053;GO:0046872;GO:0046929;GO:0050884;GO:0005739;GO:0032225;GO:0042053;GO:0046929;GO:0050884;	-	paroxysmal nonkinesiogenic dyskinesia [Source:MGISymbol;Acc:MGI:1930773]
MGP_C57BL6NJ_G0016538	12596	929	5.994	2004	10.342	6077	22.194	666	5.52177	637	5.33713	647	5.10614	1	77783665	77806226	-	12596	Tmbim1	GO:0016020;GO:0016021;	K06890	transmembrane BAX inhibitor motif containing 1[Source:MGI Symbol;Acc:MGI:1916910]
MGP_C57BL6NJ_G0016539	2211	4	0.14703	12	0.352802	0	0	0	0	11	0.525055	0	0	1	77874495	77881425	+	2211	Catip	GO:0003674;GO:0005634;GO:0005737;GO:0005856;GO:0005886;GO:0015629;GO:0016020;GO:0030030;GO:0030041;GO:0044782;	-	ciliogenesis associated TTC17 interacting protein[Source:MGI Symbol;Acc:MGI:2685062]
MGP_C57BL6NJ_G0016540	3705	2445	53.632	4280	75.0921	40906	507.899	2601	73.3143	2550	72.6361	3091	82.9338	1	77887287	77899669	+	3705	Slc11a1	GO:0000165;GO:0001818;GO:0001819;GO:0002309;GO:0002369;GO:0002606;GO:0002827;GO:0005384;GO:0005384;GO:0005764;GO:0005770;GO:0005886;GO:0006810;GO:0006811;GO:0006826;GO:0006828;GO:0006876;GO:0006879;GO:0006909;GO:0006954;GO:0007035;GO:0009617;GO:0010008;GO:0010628;GO:0015086;GO:0015707;GO:0016020;GO:0016020;GO:0016021;GO:0030001;GO:0030670;GO:0032147;GO:0032496;GO:0032623;GO:0032632;GO:0032729;GO:…	K12347	solute carrier family 11 (proton-coupled divalentmetal ion transporters), member 1 [Source:MGISymbol;Acc:MGI:1345275]
MGP_C57BL6NJ_G0016541	2908	346	9.66975	951	21.2581	1270	20.0904	272	9.76812	223	8.09303	391	13.3661	1	77905330	77911218	+	2908	Ctdsp1	GO:0001933;GO:0045665;GO:0050768;GO:2000134;	K15731	CTD (carboxy-terminal domain, RNA polymerase II,polypeptide A) small phosphatase 1 [Source:MGISymbol;Acc:MGI:2654470]
MGP_C57BL6NJ_G0016542	3551	31	0.709487	0	0	0	0	6	0.176456	4	0.11888	7	0.19596	1	77925307	77956910	+	3551	Vil1	GO:0001726;GO:0001726;GO:0001951;GO:0001951;GO:0003779;GO:0003779;GO:0005509;GO:0005509;GO:0005509;GO:0005515;GO:0005515;GO:0005546;GO:0005546;GO:0005546;GO:0005654;GO:0005737;GO:0005856;GO:0005886;GO:0005902;GO:0005902;GO:0005902;GO:0005903;GO:0005903;GO:0005903;GO:0006915;GO:0006915;GO:0007010;GO:0007173;GO:0007173;GO:0008360;GO:0008360;GO:0009617;GO:0010634;GO:0010634;GO:0030027;GO:0030027;GO:…	K05761	villin 1 [Source:MGI Symbol;Acc:MGI:98930]"
MGP_C57BL6NJ_G0016543	11081	573	4.20251	686	4.02424	213	0.884258	472	4.44836	623	5.93349	458	4.10873	1	77956862	78071875	-	11081	Usp37	GO:0000082;GO:0000082;GO:0000082;GO:0004197;GO:0004197;GO:0004197;GO:0004843;GO:0004843;GO:0004843;GO:0005634;GO:0005634;GO:0006275;GO:0006275;GO:0006508;GO:0006511;GO:0007049;GO:0008233;GO:0008234;GO:0016579;GO:0016579;GO:0016579;GO:0016579;GO:0016787;GO:0019901;GO:0035871;GO:0035871;GO:0036459;GO:0036459;GO:0051301;GO:0071108;GO:0071108;	K11850	ubiquitin specific peptidase 37 [Source:MGISymbol;Acc:MGI:2442483]
MGP_C57BL6NJ_G0016544	3826	2075	44.0765	999	16.973	1158	13.9233	1750	47.7672	1257	34.673	1526	39.6488	1	78032652	78058531	+	3826	Cnot9	GO:0000288;GO:0000932;GO:0000932;GO:0000932;GO:0005154;GO:0005515;GO:0005515;GO:0005634;GO:0005737;GO:0006351;GO:0006355;GO:0006402;GO:0006417;GO:0016020;GO:0017148;GO:0019221;GO:0019221;GO:0019900;GO:0019904;GO:0030014;GO:0030014;GO:0030014;GO:0030015;GO:0031047;GO:0032991;GO:0033138;GO:0033147;GO:0033147;GO:0042803;GO:0043234;GO:0045742;GO:2000327;GO:2000327;	K12606	CCR4-NOT transcription complex, subunit 9[Source:MGI Symbol;Acc:MGI:1928902]
MGP_C57BL6NJ_G0016545	7045	1	0.0115359	2	0.0184539	0	0	0	0	0	0	0	0	1	78070479	78096063	+	7045	Plcd4	GO:0004435;GO:0004435;GO:0004435;GO:0004629;GO:0004629;GO:0004871;GO:0005509;GO:0005622;GO:0005622;GO:0005622;GO:0005634;GO:0005737;GO:0005783;GO:0005829;GO:0005886;GO:0006629;GO:0006629;GO:0007165;GO:0007165;GO:0007165;GO:0007340;GO:0007340;GO:0007340;GO:0008081;GO:0016020;GO:0016042;GO:0016787;GO:0031965;GO:0035556;GO:0046488;GO:0046488;GO:0046872;	K05857	phospholipase C, delta 4 [Source:MGISymbol;Acc:MGI:107469]
MGP_C57BL6NJ_G0016546	11355	523	3.74324	811	4.64272	453	1.83522	324	2.97985	416	3.8664	371	3.24794	1	78093396	78116552	-	11355	Zfp142	GO:0003674;GO:0003674;GO:0003676;GO:0005575;GO:0005575;GO:0008150;GO:0008150;GO:0010468;	-	zinc finger protein 142 [Source:MGISymbol;Acc:MGI:1924514]
MGP_C57BL6NJ_G0016547	2194	76	2.81521	273	8.08844	417	8.74335	82	3.90314	82	3.94437	86	3.89657	1	78116595	78120751	+	2194	Bcs1l	GO:0000166;GO:0005524;GO:0005524;GO:0005739;GO:0005739;GO:0005743;GO:0007005;GO:0016020;GO:0016021;GO:0032981;GO:0033617;GO:0034551;GO:0034551;GO:0005739;GO:0034551;	K08900	BCS1-like (yeast) [Source:MGISymbol;Acc:MGI:1914071]
MGP_C57BL6NJ_G0016548	2004	176	7.13754	340	11.0286	637	14.6224	226	11.7773	231	12.1651	253	12.55	1	78123081	78132370	-	2004	Rnf25	GO:0004842;GO:0004842;GO:0005515;GO:0005634;GO:0005634;GO:0005634;GO:0005829;GO:0005829;GO:0016567;GO:0016567;GO:0016567;GO:0016740;GO:0046872;GO:0051059;GO:0051059;GO:0051092;GO:0051092;GO:0051092;GO:0061630;GO:0061630;GO:0061630;GO:0061630;	K10640	ring finger protein 25 [Source:MGISymbol;Acc:MGI:1890215]
MGP_C57BL6NJ_G0016549	6427	0	0	56	0.566394	58	0.415143	2	0.0324981	9	0.147787	23	0.355746	1	78132418	78169987	+	6427	Stk36	GO:0000166;GO:0003351;GO:0003351;GO:0004672;GO:0004674;GO:0005515;GO:0005515;GO:0005524;GO:0005524;GO:0005634;GO:0005634;GO:0005737;GO:0005737;GO:0005737;GO:0005829;GO:0006468;GO:0007228;GO:0007228;GO:0007275;GO:0007420;GO:0007420;GO:0008134;GO:0008134;GO:0009791;GO:0009791;GO:0016301;GO:0016310;GO:0016740;GO:0030030;GO:0045880;GO:0045880;GO:0046872;GO:0051090;GO:0051090;GO:0060271;GO:0060271;	K06228	serine/threonine kinase 36 [Source:MGISymbol;Acc:MGI:1920831]
MGP_C57BL6NJ_G0016550	11527	291	2.05168	456	2.5715	260	1.03761	218	1.97504	262	2.39875	202	1.74203	1	78195077	78238230	+	11527	Ttll4	GO:0000166;GO:0005515;GO:0005524;GO:0005524;GO:0005575;GO:0005737;GO:0005856;GO:0005874;GO:0005929;GO:0006464;GO:0015631;GO:0015631;GO:0016874;GO:0018095;GO:0018095;GO:0018095;GO:0018095;GO:0018200;GO:0018200;GO:0042995;GO:0070739;GO:0070739;	K16601	tubulin tyrosine ligase-like family, member 4[Source:MGI Symbol;Acc:MGI:1914784]
MGP_C57BL6NJ_G0016551	2173	31	1.15941	67	2.00426	125	2.64624	86	4.13309	100	4.8567	81	3.70549	1	78254528	78279891	+	2173	Cyp27a1	GO:0004497;GO:0005506;GO:0005739;GO:0005739;GO:0005739;GO:0005740;GO:0005743;GO:0005743;GO:0008203;GO:0016020;GO:0016491;GO:0016705;GO:0020037;GO:0030343;GO:0031073;GO:0031966;GO:0036378;GO:0046872;GO:0055114;GO:0055114;	K00488	cytochrome P450, family 27, subfamily a,polypeptide 1 [Source:MGI Symbol;Acc:MGI:88594]
MGP_C57BL6NJ_G0016552	3678	0	0	0	0	0	0	0	0	0	0	0	0	1	78280921	78291208	-	3678	Prkag3	GO:0000166;GO:0004679;GO:0005524;GO:0005615;GO:0005654;GO:0005829;GO:0005978;GO:0006096;GO:0006468;GO:0006629;GO:0006631;GO:0006633;GO:0014873;GO:0015758;GO:0019901;GO:0031588;GO:0032559;GO:0071900;GO:0004679;GO:0005978;GO:0006096;GO:0014873;GO:0015758;	K07200	protein kinase, AMP-activated, gamma 3 non-catatlytic subunit [Source:MGI Symbol;Acc:MGI:1891343]
MGP_C57BL6NJ_G0016553	2192	0	0	14	0.41517	218	4.57503	1	0.0476426	11	0.529606	0	0	1	78317581	78333912	+	2192	Wnt6	GO:0001658;GO:0001658;GO:0005102;GO:0005102;GO:0005109;GO:0005576;GO:0005576;GO:0005578;GO:0005578;GO:0005578;GO:0005615;GO:0005788;GO:0007165;GO:0007267;GO:0007275;GO:0007275;GO:0009798;GO:0009798;GO:0009887;GO:0009986;GO:0009986;GO:0010628;GO:0010628;GO:0016055;GO:0016055;GO:0016055;GO:0016055;GO:0016055;GO:0030182;GO:0031012;GO:0031012;GO:0042475;GO:0045165;GO:0045893;GO:0045893;GO:0060684;GO:…	K00445	wingless-type MMTV integration site family, member6 [Source:MGI Symbol;Acc:MGI:98960]
MGP_C57BL6NJ_G0016554	1816	0	0	0	0	0	0	0	0	0	0	0	0	1	78342133	78354075	+	1816	Wnt10a	GO:0001942;GO:0005102;GO:0005102;GO:0005109;GO:0005576;GO:0005576;GO:0005578;GO:0005615;GO:0007165;GO:0007267;GO:0007275;GO:0007275;GO:0009887;GO:0010469;GO:0010628;GO:0010628;GO:0014033;GO:0014033;GO:0016055;GO:0016055;GO:0016055;GO:0030182;GO:0031069;GO:0042476;GO:0042487;GO:0042487;GO:0043586;GO:0043588;GO:0045165;GO:0048018;GO:0048730;GO:0048733;GO:0060070;	K01357	wingless-type MMTV integration site family, member10A [Source:MGI Symbol;Acc:MGI:108071]
MGP_C57BL6NJ_G0016555	2799	0	0	0	0	0	0	0	0	0	0	0	0	1	78411222	78414020	+	2799	Cdk5r2	GO:0001764;GO:0001764;GO:0003779;GO:0003779;GO:0005737;GO:0005737;GO:0005886;GO:0008092;GO:0008289;GO:0016020;GO:0016020;GO:0016533;GO:0016534;GO:0016534;GO:0016534;GO:0016534;GO:0021549;GO:0021549;GO:0021722;GO:0021722;GO:0021766;GO:0021766;GO:0021819;GO:0021819;GO:0030426;GO:0043005;GO:0045860;GO:0045860;GO:0045956;GO:0045956;GO:0071902;	K19929	cyclin-dependent kinase 5, regulatory subunit 2(p39) [Source:MGI Symbol;Acc:MGI:1330828]
MGP_C57BL6NJ_G0016556	1618	0	0	0	0	0	0	0	0	0	0	0	0	1	78439284	78443216	-	1618	Fev	GO:0000978;GO:0000981;GO:0000981;GO:0001077;GO:0003677;GO:0003690;GO:0003700;GO:0003700;GO:0005634;GO:0005634;GO:0005634;GO:0005634;GO:0006351;GO:0006355;GO:0006355;GO:0006357;GO:0006357;GO:0006366;GO:0007275;GO:0007399;GO:0010628;GO:0010628;GO:0016607;GO:0030154;GO:0030154;GO:0042551;GO:0042551;GO:0043025;GO:0043565;GO:0045893;GO:0045944;GO:0048665;GO:0048665;GO:0051611;GO:1905627;	K09437	FEV (ETS oncogene family) [Source:MGISymbol;Acc:MGI:2449712]
MGP_C57BL6NJ_G0016557	1199	0	0	0	0	0	0	0	0	0	0	0	0	1	78447594	78450825	-	1199	Cryba2	GO:0002088;GO:0002088;GO:0005212;GO:0005212;GO:0042803;GO:0042803;	-	crystallin, beta A2 [Source:MGISymbol;Acc:MGI:104336]
MGP_C57BL6NJ_G0016558	7821	1	0.0103913	0	0	0	0	0	0	1	0.0134939	0	0	1	78459809	78494010	-	7821	Ccdc108	GO:0003723;GO:0005575;GO:0005886;GO:0005929;GO:0008150;GO:0016020;GO:0016021;GO:0031514;GO:0042995;	-	coiled-coil domain containing 108 [Source:MGISymbol;Acc:MGI:2444274]
MGP_C57BL6NJ_G0016559	3048	0	0	0	0	4	0.0603703	0	0	0	0	0	0	1	78503714	78510098	-	3048	Ihh	GO:0005615;GO:0005886;GO:0006508;GO:0006508;GO:0007267;GO:0007275;GO:0007275;GO:0008233;GO:0008233;GO:0016020;GO:0016539;GO:0016787;GO:0046872;	K11989	Indian hedgehog [Source:MGI Symbol;Acc:MGI:96533]"
MGP_C57BL6NJ_G0016560	1745	25	1.16434	38	1.41556	146	3.84889	18	1.07724	11	0.66527	10	0.569673	1	78526947	78638056	-	1745	Nhej1	GO:0005634;GO:0006302;	-	nonhomologous end-joining factor 1 [Source:MGISymbol;Acc:MGI:1922820]
MGP_C57BL6NJ_G0016561	2167	0	0	0	0	0	0	0	0	0	0	0	0	1	78638332	78646681	-	2167	Slc23a3	GO:0005215;GO:0006810;GO:0016020;GO:0016020;GO:0016021;GO:0022857;GO:0055085;	K14612	solute carrier family 23 (nucleobase transporters),member 3 [Source:MGI Symbol;Acc:MGI:104516]
MGP_C57BL6NJ_G0016562	5635	285	4.1104	875	10.0938	1955	15.9599	297	5.50426	237	4.43869	403	7.10938	1	78647345	78655504	-	5635	Cnppd1	GO:0000079;GO:0003674;GO:0005575;GO:0008150;GO:0016020;GO:0016021;GO:0019901;	-	cyclin Pas1/PHO80 domain containing 1 [Source:MGISymbol;Acc:MGI:1916421]
MGP_C57BL6NJ_G0016563	2999	918	24.8771	1104	23.9294	3820	58.5956	546	19.0131	488	17.1729	565	18.7281	1	78655571	78660701	+	2999	Fam134a	GO:0003674;GO:0008150;GO:0016020;GO:0016021;GO:0016021;	-	family with sequence similarity 134, member A[Source:MGI Symbol;Acc:MGI:2388278]
MGP_C57BL6NJ_G0016564	1772	71	3.25633	213	7.81366	388	10.0727	32	1.88592	39	2.32275	49	2.74886	1	78681396	78684379	+	1772	Zfand2b	GO:0000502;GO:0005783;GO:0031225;GO:0031593;GO:0036435;GO:0043130;GO:0043161;GO:0043567;GO:0045047;	-	zinc finger, AN1 type domain 2B [Source:MGISymbol;Acc:MGI:1916068]
MGP_C57BL6NJ_G0016565	5315	11	0.168199	0	0	0	0	3	0.058946	0	0	0	0	1	78684467	78693140	-	5315	Abcb6	GO:0000139;GO:0000166;GO:0005524;GO:0005524;GO:0005524;GO:0005654;GO:0005739;GO:0005739;GO:0005739;GO:0005739;GO:0005740;GO:0005741;GO:0005741;GO:0005768;GO:0005768;GO:0005783;GO:0005783;GO:0005789;GO:0005794;GO:0005794;GO:0005829;GO:0005886;GO:0005886;GO:0006779;GO:0006810;GO:0006810;GO:0007420;GO:0010008;GO:0015439;GO:0015562;GO:0015886;GO:0016020;GO:0016021;GO:0016021;GO:0016887;GO:0020037;GO:…	K05661	ATP-binding cassette, sub-family B (MDR/TAP),member 6 [Source:MGI Symbol;Acc:MGI:1921354]
MGP_C57BL6NJ_G0016566	5762	217	3.06069	424	4.78334	692	5.52473	125	2.26555	101	1.8499	190	3.27794	1	78693608	78704944	-	5762	Atg9a	GO:0005794;GO:0006810;GO:0006914;GO:0015031;GO:0016020;GO:0016021;GO:0030659;GO:0031410;	K17907	autophagy related 9A [Source:MGISymbol;Acc:MGI:2138446]
MGP_C57BL6NJ_G0016567	5142	154	2.43401	306	3.86837	217	1.94136	90	1.82788	103	2.114	143	2.76455	1	78704899	78711936	+	5142	Ankzf1	-	-	ankyrin repeat and zinc finger domain containing 1[Source:MGI Symbol;Acc:MGI:1098746]
MGP_C57BL6NJ_G0016568	5904	110	1.51419	207	2.2791	261	2.03363	62	1.09668	109	1.94841	114	1.91946	1	78710785	78723333	-	5904	Glb1l	GO:0005615;	-	galactosidase, beta 1-like [Source:MGISymbol;Acc:MGI:1921827]
MGP_C57BL6NJ_G0016569	4518	393	7.06936	577	8.30173	788	8.0234	261	6.03296	298	6.96099	317	6.97483	1	78723358	78728816	+	4518	Stk16	GO:0000166;GO:0001077;GO:0004672;GO:0004672;GO:0004674;GO:0004674;GO:0004715;GO:0005524;GO:0005524;GO:0005737;GO:0005798;GO:0005798;GO:0005829;GO:0006366;GO:0006468;GO:0006468;GO:0006468;GO:0016020;GO:0016301;GO:0016310;GO:0016740;GO:0018108;GO:0045944;GO:0046777;GO:0046777;GO:0046777;GO:0048471;GO:0071560;GO:0071560;	K08856	serine/threonine kinase 16 [Source:MGISymbol;Acc:MGI:1313271]
MGP_C57BL6NJ_G0016570	3701	447	9.81571	1011	17.7571	2145	26.6616	312	8.80384	213	6.07381	248	6.66122	1	78727438	78733075	-	3701	Tuba4a	GO:0000166;GO:0000226;GO:0000278;GO:0003924;GO:0003924;GO:0005200;GO:0005200;GO:0005525;GO:0005525;GO:0005525;GO:0005737;GO:0005737;GO:0005856;GO:0005856;GO:0005874;GO:0005874;GO:0005874;GO:0005874;GO:0007010;GO:0007017;GO:0007017;GO:0015630;GO:0019899;GO:0019901;GO:0070062;GO:0019899;	K07374	tubulin, alpha 4A [Source:MGISymbol;Acc:MGI:1095410]
MGP_C57BL6NJ_G0016571	1123	0	0	0	0	0	0	0	0	0	0	0	0	1	78733305	78745282	-	1123	A630095N17Rik	GO:0003674;GO:0005575;GO:0008150;	-	RIKEN cDNA A630095N17 gene [Source:MGISymbol;Acc:MGI:2686470]
MGP_C57BL6NJ_G0016572	4283	85	1.61289	189	2.86848	365	3.92033	20	0.487661	37	0.911705	33	0.765926	1	78749584	78758891	+	4283	Dnajb2	GO:0000502;GO:0001671;GO:0001671;GO:0001671;GO:0005634;GO:0005634;GO:0005737;GO:0005737;GO:0005783;GO:0005789;GO:0005829;GO:0005829;GO:0008285;GO:0008285;GO:0016020;GO:0016234;GO:0030308;GO:0030308;GO:0030433;GO:0030433;GO:0030544;GO:0030544;GO:0030544;GO:0031227;GO:0031227;GO:0031227;GO:0031396;GO:0031396;GO:0031398;GO:0031593;GO:0031593;GO:0031625;GO:0031965;GO:0032091;GO:0032436;GO:0032436;GO:…	K09508	DnaJ heat shock protein family (Hsp40) member B2[Source:MGI Symbol;Acc:MGI:1928739]
MGP_C57BL6NJ_G0016573	4239	249	4.77386	606	9.29283	162	1.75804	48	1.18254	21	0.522825	5	0.117254	1	78760226	78781436	-	4239	Ptprn	GO:0004721;GO:0004725;GO:0006470;GO:0016020;GO:0016021;GO:0016787;GO:0035335;	K07817	protein tyrosine phosphatase, receptor type, N[Source:MGI Symbol;Acc:MGI:102765]
MGP_C57BL6NJ_G0016574	1032	0	0	0	0	0	0	0	0	1	0.102264	0	0	1	78790062	78797524	-	1032	Resp18	GO:0001701;GO:0001701;GO:0003674;GO:0005576;GO:0005783;GO:0005783;GO:0005783;GO:0005783;GO:0005794;GO:0030141;GO:0031410;GO:0043204;GO:0048237;	-	regulated endocrine-specific protein 18 [Source:MGISymbol;Acc:MGI:1098222]
MGP_C57BL6NJ_G0016575	3886	161	3.3671	507	8.48094	2204	26.0908	105	2.82178	90	2.44422	92	2.35346	1	78827059	78837109	-	3886	Dnpep	GO:0004177;GO:0004177;GO:0005576;GO:0005634;GO:0005737;GO:0005737;GO:0005829;GO:0006508;GO:0006508;GO:0006518;GO:0008233;GO:0008237;GO:0008270;GO:0016787;GO:0042802;GO:0046872;GO:0070006;GO:0072562;	K01267	aspartyl aminopeptidase [Source:MGISymbol;Acc:MGI:1278328]
MGP_C57BL6NJ_G0016576	3754	0	0	9	0.155843	0	0	0	0	0	0	1	0.0264805	1	78880030	78888280	+	3754	Des	GO:0005198;GO:0005198;GO:0005200;GO:0005515;GO:0005634;GO:0005634;GO:0005737;GO:0005737;GO:0005737;GO:0005856;GO:0005856;GO:0005882;GO:0005882;GO:0005882;GO:0005882;GO:0005886;GO:0005911;GO:0005911;GO:0005916;GO:0005916;GO:0005921;GO:0007517;GO:0008092;GO:0014704;GO:0016020;GO:0030018;GO:0030018;GO:0030018;GO:0031594;GO:0031594;GO:0042383;GO:0042383;GO:0042383;GO:0042802;GO:0043292;GO:0043292;GO:…	K07610	desmin [Source:MGI Symbol;Acc:MGI:94885]"
MGP_C57BL6NJ_G0016577	12732	428	2.732	1121	5.72332	3038	10.9766	347	2.84623	549	4.55068	495	3.86482	1	78896319	78954320	+	12732	Speg	GO:0000166;GO:0001701;GO:0004672;GO:0004672;GO:0004674;GO:0004674;GO:0005524;GO:0005524;GO:0005634;GO:0005634;GO:0006468;GO:0016301;GO:0016310;GO:0016740;GO:0030154;GO:0042692;GO:0055013;GO:0060541;GO:0072358;GO:0072358;	K08809	SPEG complex locus [Source:MGISymbol;Acc:MGI:109282]
MGP_C57BL6NJ_G0016578	2395	216	7.32962	581	15.7692	1645	31.5965	219	9.54938	152	6.6979	150	6.22596	1	78957930	78967194	+	2395	Gmppa	GO:0003674;GO:0005575;GO:0005737;GO:0009058;GO:0016740;GO:0016779;	K00966	GDP-mannose pyrophosphorylase A [Source:MGISymbol;Acc:MGI:1916330]
MGP_C57BL6NJ_G0016579	2727	0	0	0	0	0	0	0	0	0	0	0	0	1	78974486	79006305	+	2727	Asic4	GO:0001662;GO:0005272;GO:0005272;GO:0006810;GO:0006811;GO:0006814;GO:0006814;GO:0016020;GO:0016020;GO:0016021;GO:0035725;GO:0001662;	K04831	acid-sensing (proton-gated) ion channel familymember 4 [Source:MGI Symbol;Acc:MGI:2652846]
MGP_C57BL6NJ_G0016580	3856	132	2.78208	507	8.54692	1266	15.1034	41	1.11041	47	1.28636	41	1.05698	1	79006531	79011277	-	3856	Chpf	GO:0005575;GO:0005737;GO:0005739;GO:0005759;GO:0005794;GO:0005829;GO:0008376;GO:0016020;GO:0016021;GO:0016740;GO:0016757;GO:0016757;GO:0030206;GO:0030206;GO:0032580;GO:0032580;GO:0046872;GO:0047238;GO:0050510;	K00747	chondroitin polymerizing factor [Source:MGISymbol;Acc:MGI:106576]
MGP_C57BL6NJ_G0016581	8529	0	0	63	0.480155	0	0	0	0	0	0	0	0	1	79011280	79040046	-	8529	Obsl1	-	K19574	obscurin-like 1 [Source:MGISymbol;Acc:MGI:2138628]
MGP_C57BL6NJ_G0016582	2503	0	0	19	0.493437	20	0.367576	1	0.041723	16	0.674621	0	0	1	79011502	79017705	+	2503	Tmem198	GO:0003674;GO:0005886;GO:0005886;GO:0007275;GO:0016020;GO:0016021;GO:0016055;GO:0031410;GO:0031410;GO:0090263;	-	transmembrane protein 198 [Source:MGISymbol;Acc:MGI:2443133]
MGP_C57BL6NJ_G0016583	1475	0	0	0	0	0	0	0	0	0	0	0	0	1	79040653	79043942	+	1475	Inha	GO:0001541;GO:0001750;GO:0001917;GO:0005102;GO:0005125;GO:0005160;GO:0005179;GO:0005576;GO:0005615;GO:0005615;GO:0005737;GO:0008083;GO:0008083;GO:0008584;GO:0010469;GO:0010862;GO:0030509;GO:0034673;GO:0034711;GO:0042127;GO:0042541;GO:0042541;GO:0042981;GO:0043025;GO:0043408;GO:0043512;GO:0043513;GO:0046882;GO:0046982;GO:0048468;GO:0051726;GO:0060395;	K05500	inhibin alpha [Source:MGI Symbol;Acc:MGI:96569]"
MGP_C57BL6NJ_G0016584	5754	244	3.4463	867	9.79463	2944	23.5367	156	2.83133	203	3.72329	244	4.21542	1	79062930	79078874	+	5754	Stk11ip	GO:0005200;GO:0005737;GO:0005737;GO:0005737;GO:0005765;GO:0007010;GO:0008104;GO:0008104;GO:0019901;GO:0019901;GO:0043231;	-	serine/threonine kinase 11 interacting protein[Source:MGI Symbol;Acc:MGI:1918978]
MGP_C57BL6NJ_G0016585	8596	73	0.690176	101	0.763772	147	0.786682	23	0.279427	20	0.245547	8	0.0925155	1	79087805	79103696	+	8596	Slc4a3	GO:0005452;GO:0005886;GO:0005886;GO:0005887;GO:0006810;GO:0006811;GO:0006820;GO:0008509;GO:0008510;GO:0015297;GO:0015301;GO:0015301;GO:0015301;GO:0015698;GO:0015701;GO:0015701;GO:0016020;GO:0016020;GO:0016021;GO:0016021;GO:0019899;GO:0035725;GO:0051453;GO:0051453;GO:0051453;GO:0055085;GO:0098656;	K13856	solute carrier family 4 (anion exchanger), member 3[Source:MGI Symbol;Acc:MGI:109350]
MGP_C57BL6NJ_G0016586	8054	69	0.696259	91	0.734461	218	1.24515	21	0.272298	19	0.248968	6	0.074056	1	81053366	81213081	-	8054	Epha4	GO:0000166;GO:0004672;GO:0004672;GO:0004672;GO:0004713;GO:0004713;GO:0004713;GO:0004714;GO:0004714;GO:0004888;GO:0005003;GO:0005004;GO:0005004;GO:0005005;GO:0005005;GO:0005005;GO:0005515;GO:0005515;GO:0005524;GO:0005524;GO:0005737;GO:0005737;GO:0005737;GO:0005741;GO:0005768;GO:0005769;GO:0005783;GO:0005794;GO:0005886;GO:0005886;GO:0005886;GO:0005887;GO:0005887;GO:0005887;GO:0005887;GO:0005887;GO:…	K05105	Eph receptor A4 [Source:MGI Symbol;Acc:MGI:98277]"
MGP_C57BL6NJ_G0016587	6187	0	0	6	0.0630391	1	0.00743529	0	0	0	0	0	0	1	81836367	81940203	-	6187	Pax3	GO:0000122;GO:0001755;GO:0001843;GO:0003677;GO:0003677;GO:0003682;GO:0003700;GO:0003705;GO:0005515;GO:0005515;GO:0005634;GO:0005634;GO:0005654;GO:0005667;GO:0006351;GO:0006355;GO:0006355;GO:0007275;GO:0007399;GO:0007507;GO:0007517;GO:0007517;GO:0008283;GO:0008284;GO:0014807;GO:0016477;GO:0021527;GO:0021915;GO:0035914;GO:0043565;GO:0043565;GO:0045893;GO:0045944;GO:0048066;GO:0048663;GO:0055007;GO:…	K09381	paired box 3 [Source:MGI Symbol;Acc:MGI:97487]"
MGP_C57BL6NJ_G0016588	4126	0	0	0	0	0	0	1	0.0253109	0	0	1	0.024093	1	82070565	82186552	+	4126	Sgpp2	GO:0005783;GO:0005783;GO:0005789;GO:0006670;GO:0016020;GO:0016021;GO:0016311;GO:0016787;GO:0042392;	K04717	sphingosine-1-phosphate phosphotase 2 [Source:MGISymbol;Acc:MGI:3589109]
MGP_C57BL6NJ_G0016589	2620	1092	33.8731	1055	26.1752	1363	23.9317	455	18.1362	430	17.3208	603	22.879	1	82184114	82256454	-	2620	Farsb	GO:0000166;GO:0000166;GO:0000287;GO:0003723;GO:0004812;GO:0004826;GO:0004826;GO:0004826;GO:0004826;GO:0005524;GO:0005524;GO:0005737;GO:0005737;GO:0006412;GO:0006432;GO:0006432;GO:0006432;GO:0006432;GO:0009328;GO:0009328;GO:0009328;GO:0016020;GO:0016874;GO:0051290;GO:0051290;	K01890	phenylalanyl-tRNA synthetase, beta subunit[Source:MGI Symbol;Acc:MGI:1346035]
MGP_C57BL6NJ_G0016590	3305	0	0	0	0	0	0	0	0	0	0	0	0	1	82266437	82289054	-	3305	-	-	-	-
MGP_C57BL6NJ_G0016591	1558	7	0.365144	0	0	0	0	0	0	0	0	0	0	1	82287887	82319228	+	1558	Mogat1	GO:0003846;GO:0003846;GO:0004144;GO:0005783;GO:0005783;GO:0005789;GO:0006071;GO:0006629;GO:0006651;GO:0016020;GO:0016020;GO:0016021;GO:0016740;GO:0016746;GO:0016747;GO:0019432;GO:0003846;GO:0004144;GO:0005783;GO:0006651;GO:0016020;	-	monoacylglycerol O-acyltransferase 1 [Source:MGISymbol;Acc:MGI:1915643]
MGP_C57BL6NJ_G0016592	4361	1048	19.5303	1219	18.1701	541	5.70676	596	14.2724	619	14.9798	750	17.0961	1	82441033	82505412	+	4361	Acsl3	GO:0000166;GO:0001676;GO:0003824;GO:0004467;GO:0004467;GO:0005524;GO:0005739;GO:0005741;GO:0005777;GO:0005778;GO:0005783;GO:0005783;GO:0005789;GO:0005794;GO:0005811;GO:0006629;GO:0006631;GO:0006633;GO:0008152;GO:0016020;GO:0016020;GO:0016021;GO:0016874;GO:0019901;GO:0019904;GO:0031090;GO:0034379;GO:0042998;GO:0043231;GO:0044539;GO:0048471;GO:0051047;GO:0102391;GO:2001247;	-	acyl-CoA synthetase long-chain family member 3[Source:MGI Symbol;Acc:MGI:1921455]
MGP_C57BL6NJ_G0016593	6983	839	9.76458	881	8.20111	86	0.566545	549	8.21045	515	7.78334	597	8.49871	1	82452801	82466275	+	6983	Utp14b	GO:0006364;GO:0032040;	K14567	UTP14B small subunit processome component[Source:MGI Symbol;Acc:MGI:2445092]
MGP_C57BL6NJ_G0016594	2657	18	0.550572	52	1.27219	0	0	0	0	0	0	0	0	1	82657434	82660704	+	2657	Kcne4	GO:0005244;GO:0005249;GO:0005267;GO:0005267;GO:0006810;GO:0006811;GO:0006811;GO:0006813;GO:0008076;GO:0016020;GO:0016020;GO:0016021;GO:0016324;GO:0034765;GO:0034765;GO:0044325;GO:0071805;GO:0071805;	K04898	potassium voltage-gated channel, Isk-relatedsubfamily, gene 4 [Source:MGI Symbol;Acc:MGI:1891125]
MGP_C57BL6NJ_G0016595	2515	0	0	0	0	0	0	1	0.0415239	2	0.0839253	2	0.079052	1	83324087	83329538	-	2515	Scg2	GO:0000165;GO:0000165;GO:0001525;GO:0001525;GO:0001525;GO:0001525;GO:0001938;GO:0001938;GO:0005125;GO:0005125;GO:0005125;GO:0005576;GO:0005615;GO:0005615;GO:0005615;GO:0010469;GO:0030141;GO:0030141;GO:0030141;GO:0031045;GO:0031045;GO:0035556;GO:0035556;GO:0042056;GO:0042056;GO:0042056;GO:0048245;GO:0048245;GO:0048245;GO:0050918;GO:0050918;GO:0050930;GO:0050930;GO:0098992;GO:0098992;GO:2000352;GO:…	-	secretogranin II [Source:MGISymbol;Acc:MGI:103033]
MGP_C57BL6NJ_G0016596	905	25	2.24504	50	3.59137	7	0.355818	28	3.23107	13	1.51599	22	2.41655	1	83516077	83585672	-	905	-	-	-	-
MGP_C57BL6NJ_G0016597	5638	475	6.84703	752	8.67025	1919	15.6577	459	8.50206	478	8.94754	435	7.66982	1	83615751	83685074	-	5638	Wdfy1	GO:0005515;GO:0005545;GO:0005634;GO:0005768;GO:0005769;GO:0005769;GO:0005769;GO:0005829;GO:0034141;GO:0034141;GO:0034141;GO:0034145;GO:0034145;GO:0034145;GO:0046872;GO:0046872;	-	WD repeat and FYVE domain containing 1 [Source:MGISymbol;Acc:MGI:1916618]
MGP_C57BL6NJ_G0016598	1644	98	4.8446	172	6.80089	641	17.9364	102	6.4794	78	5.00718	84	5.07924	1	83684949	83690376	+	1644	Mrpl44	GO:0003723;GO:0003723;GO:0003725;GO:0004518;GO:0004519;GO:0004525;GO:0004525;GO:0005634;GO:0005634;GO:0005739;GO:0005739;GO:0005762;GO:0005762;GO:0005840;GO:0005886;GO:0006396;GO:0006396;GO:0016787;GO:0030422;GO:0030529;GO:0031053;GO:0031054;GO:0070125;GO:0070125;GO:0090305;GO:0090501;GO:0090502;GO:0090502;	K17425	mitochondrial ribosomal protein L44 [Source:MGISymbol;Acc:MGI:1916413]
MGP_C57BL6NJ_G0016599	8287	932	9.14012	1508	11.8289	817	4.53527	109	1.37362	27	0.343849	22	0.263904	1	83704638	83787589	-	8287	Serpine2	GO:0004867;GO:0004867;GO:0004867;GO:0004867;GO:0004867;GO:0005102;GO:0005102;GO:0005539;GO:0005576;GO:0005576;GO:0005576;GO:0005576;GO:0005615;GO:0005615;GO:0005615;GO:0005615;GO:0005615;GO:0005615;GO:0005829;GO:0007275;GO:0007399;GO:0007596;GO:0007596;GO:0008201;GO:0008201;GO:0008285;GO:0008285;GO:0009611;GO:0009611;GO:0010466;GO:0010466;GO:0010466;GO:0010544;GO:0010544;GO:0010544;GO:0010757;GO:…	K16643	serine (or cysteine) peptidase inhibitor, clade E,member 2 [Source:MGI Symbol;Acc:MGI:101780]
MGP_C57BL6NJ_G0016600	3357	2	0.0484186	0	0	0	0	0	0	0	0	2	0.0592242	1	84144918	84166791	-	3357	Fam124b	GO:0003674;GO:0005634;GO:0005654;GO:0005739;GO:0008150;	-	family with sequence similarity 124, member B[Source:MGI Symbol;Acc:MGI:3026880]
MGP_C57BL6NJ_G0016601	4873	3525	58.789	2863	38.1912	1104	10.422	2231	47.8123	2257	48.8805	2110	43.0434	1	84225283	84302136	-	4873	Cul3	GO:0000122;GO:0000122;GO:0000139;GO:0000209;GO:0000209;GO:0000278;GO:0000278;GO:0000902;GO:0000902;GO:0001701;GO:0001701;GO:0001831;GO:0001831;GO:0004842;GO:0004842;GO:0005112;GO:0005515;GO:0005634;GO:0005634;GO:0005634;GO:0005737;GO:0005737;GO:0005737;GO:0005794;GO:0005794;GO:0005794;GO:0005827;GO:0005827;GO:0005929;GO:0006357;GO:0006357;GO:0006511;GO:0006511;GO:0006511;GO:0006511;GO:0006513;GO:…	K03869	cullin 3 [Source:MGI Symbol;Acc:MGI:1347360]"
MGP_C57BL6NJ_G0016602	18250	5992	26.6835	6371	22.6926	2719	6.85369	7049	40.3368	8644	49.9865	6660	36.2771	1	84483678	84765190	-	18250	Dock10	GO:0005085;GO:0005622;GO:0007264;GO:0065009;	K21853	dedicator of cytokinesis 10 [Source:MGISymbol;Acc:MGI:2146320]
MGP_C57BL6NJ_G0016603	12506	630	4.09407	581	3.01993	167	0.614294	56	0.467634	0	0	0	0	1	85108619	85400364	+	12506	Nyap2	GO:0005622;GO:0014065;GO:0048812;	-	neuronal tyrosine-phophorylated phosphoinositide 3-kinase adaptor 2 [Source:MGI Symbol;Acc:MGI:2443135]
MGP_C57BL6NJ_G0016604	9147	642	5.70414	983	6.98576	10	0.0502921	63	0.71928	0	0	23	0.24996	1	86344306	86404098	-	9147	Irs1	GO:0005158;GO:0005622;GO:0008286;	K16172	insulin receptor substrate 1 [Source:MGISymbol;Acc:MGI:99454]
MGP_C57BL6NJ_G0016605	2822	0	0	0	0	0	0	0	0	0	0	0	0	1	86344317	86347138	+	2822	Gm9747	GO:0003674;GO:0005575;GO:0008150;	-	predicted gene 9747 [Source:MGISymbol;Acc:MGI:3710571]
MGP_C57BL6NJ_G0016606	6966	703	8.20173	531	4.95507	1682	11.1076	457	6.85124	428	6.48427	398	5.67964	1	86429154	86563207	+	6966	Rhbdd1	GO:0004175;GO:0004175;GO:0004175;GO:0004252;GO:0004252;GO:0004252;GO:0004252;GO:0005515;GO:0005739;GO:0005783;GO:0005783;GO:0005789;GO:0006508;GO:0006915;GO:0007283;GO:0008233;GO:0008233;GO:0008236;GO:0010954;GO:0010954;GO:0016020;GO:0016021;GO:0016021;GO:0016787;GO:0030154;GO:0030176;GO:0030176;GO:0031293;GO:0031293;GO:0033619;GO:0033619;GO:0034620;GO:0034620;GO:0034644;GO:0034644;GO:0036503;GO:…	K09651	rhomboid domain containing 1 [Source:MGISymbol;Acc:MGI:1924117]
MGP_C57BL6NJ_G0016607	10611	0	0	8	0.0490086	0	0	0	0	0	0	0	0	1	86566252	86718695	-	10611	Col4a4	GO:0001525;GO:0001886;GO:0005201;GO:0005201;GO:0005201;GO:0005201;GO:0005201;GO:0005576;GO:0005578;GO:0005581;GO:0005581;GO:0005587;GO:0005587;GO:0005587;GO:0005587;GO:0005604;GO:0005604;GO:0005604;GO:0005605;GO:0005605;GO:0005615;GO:0030020;GO:0030198;GO:0031012;GO:0032836;GO:0032836;GO:0032836;GO:0062023;	K06237	collagen, type IV, alpha 4 [Source:MGISymbol;Acc:MGI:104687]
MGP_C57BL6NJ_G0016608	9965	4	0.0326224	7	0.0456625	0	0	0	0	0	0	0	0	1	86718767	86869638	+	9965	Col4a3	GO:0005587;GO:0005604;GO:0007166;GO:0016525;GO:0032836;GO:0038063;	K06237	collagen, type IV, alpha 3 [Source:MGISymbol;Acc:MGI:104688]
MGP_C57BL6NJ_G0016609	9763	618	5.14445	871	5.79927	1734	8.17041	371	3.96851	470	5.0806	322	3.27864	1	86872469	86899970	+	9763	Mff	GO:0000266;GO:0005515;GO:0005739;GO:0005741;GO:0005741;GO:0005777;GO:0006626;GO:0008021;GO:0008021;GO:0008053;GO:0010666;GO:0016020;GO:0016021;GO:0030054;GO:0030672;GO:0031410;GO:0031966;GO:0042803;GO:0044877;GO:0045202;GO:0051020;GO:0070584;GO:0090141;GO:0090141;GO:0090314;GO:1900244;GO:0000266;GO:0005739;GO:0005741;GO:0005777;	K22076	mitochondrial fission factor [Source:MGISymbol;Acc:MGI:1922984]
MGP_C57BL6NJ_G0016610	1508	4	0.215572	0	0	0	0	0	0	0	0	2	0.131841	1	86904219	86916033	-	1508	Tm4sf20	GO:0003674;GO:0005783;GO:0005789;GO:0005789;GO:0005886;GO:0005925;GO:0016020;GO:0016021;GO:0016021;GO:0016021;GO:0045861;GO:0045861;	-	transmembrane 4 L six family member 20 [Source:MGISymbol;Acc:MGI:1913511]
MGP_C57BL6NJ_G0016611	8384	1059	10.2655	1307	10.1336	1112	6.10143	760	9.4667	785	9.88142	641	7.60025	1	86988270	87065584	+	8384	Agfg1	GO:0001675;GO:0003677;GO:0005096;GO:0005634;GO:0006810;GO:0007275;GO:0007283;GO:0007289;GO:0030154;GO:0031410;GO:0031410;GO:0031410;GO:0042995;GO:0043025;GO:0043231;GO:0043231;GO:0043547;GO:0045109;GO:0046872;GO:0001675;GO:0007289;GO:0031410;GO:0042995;GO:0043025;GO:0045109;	K15044	ArfGAP with FG repeats 1 [Source:MGISymbol;Acc:MGI:1333754]
MGP_C57BL6NJ_G0016612	3065	1	0.0265157	9	0.190876	0	0	0	0	0	0	0	0	1	87218215	87245657	-	3065	Slc19a3	GO:0005886;GO:0005886;GO:0006810;GO:0015234;GO:0015234;GO:0015234;GO:0015234;GO:0015234;GO:0015884;GO:0015888;GO:0015888;GO:0016020;GO:0016021;GO:0016021;GO:0051180;GO:0055085;GO:0071934;GO:0071934;GO:0090482;	K14610	solute carrier family 19, member 3 [Source:MGISymbol;Acc:MGI:1931307]
MGP_C57BL6NJ_G0016613	1007	0	0	0	0	0	0	0	0	0	0	0	0	1	87270910	87271916	+	1007	Krtap28-13	GO:0003674;GO:0005575;GO:0008150;	-	keratin associated protein 28-13 [Source:MGISymbol;Acc:MGI:1918636]
MGP_C57BL6NJ_G0016614	1421	0	0	0	0	0	0	0	0	0	0	0	0	1	87332459	87334860	+	1421	Ccl20	GO:0002548;GO:0005125;GO:0005125;GO:0005125;GO:0005515;GO:0005576;GO:0005576;GO:0005615;GO:0005615;GO:0005615;GO:0005622;GO:0006935;GO:0006935;GO:0006935;GO:0006954;GO:0006954;GO:0006955;GO:0007186;GO:0008009;GO:0008009;GO:0008009;GO:0010469;GO:0030593;GO:0031731;GO:0031731;GO:0031731;GO:0035584;GO:0035584;GO:0043547;GO:0048020;GO:0048247;GO:0050726;GO:0051770;GO:0060326;GO:0060326;GO:0060326;GO:…	-	chemokine (C-C motif) ligand 20 [Source:MGISymbol;Acc:MGI:1329031]
MGP_C57BL6NJ_G0016615	2140	0	0	0	0	0	0	0	0	0	0	0	0	1	87376852	87443386	+	2140	Daw1	GO:0007368;GO:0007507;	K19760	dynein assembly factor with WDR repeat domains 1[Source:MGI Symbol;Acc:MGI:1923089]
MGP_C57BL6NJ_G0016616	9602	0	0	0	0	0	0	4	0.0435046	0	0	1	0.0103528	1	87484471	87658814	-	9602	Sphkap	-	-	SPHK1 interactor, AKAP domain containing[Source:MGI Symbol;Acc:MGI:1924879]
MGP_C57BL6NJ_G0016617	8080	2337	23.5061	2587	20.8125	2712	15.4403	2351	30.3863	2717	35.4878	1880	23.1296	1	88328703	88683010	-	8080	Pid1	GO:0001933;GO:0005515;GO:0005737;GO:0005737;GO:0005737;GO:0005737;GO:0010628;GO:0042127;GO:0044320;GO:0044320;GO:0045944;GO:0046325;GO:0046325;GO:0046627;GO:0046627;GO:0051881;GO:0051881;GO:0051881;GO:0070346;GO:0070584;GO:0071345;GO:0071345;GO:0071354;GO:0071354;GO:0071356;GO:0071356;GO:0071398;GO:0071398;GO:0090298;GO:1903077;GO:2000045;GO:2000377;GO:2000377;GO:2000379;GO:2001170;GO:2001171;GO:…	-	phosphotyrosine interaction domain containing 1[Source:MGI Symbol;Acc:MGI:2138391]
MGP_C57BL6NJ_G0016618	4784	7	0.118916	12	0.163053	9	0.0865425	5	0.109148	0	0	4	0.083117	1	88688644	89008374	-	4784	Dner	GO:0005112;GO:0005112;GO:0005509;GO:0005769;GO:0005886;GO:0005886;GO:0005886;GO:0007219;GO:0007220;GO:0007220;GO:0007275;GO:0010001;GO:0010001;GO:0016020;GO:0016021;GO:0030154;GO:0030425;GO:0030425;GO:0043025;GO:0043025;GO:0048741;GO:0048741;	-	delta/notch-like EGF repeat containing [Source:MGISymbol;Acc:MGI:2152889]
MGP_C57BL6NJ_G0016619	16590	9115	44.6523	11327	44.382	5841	16.1964	7008	44.1148	8480	53.9449	7338	43.9696	1	89028460	89179524	-	16590	Trip12	GO:0004842;GO:0004842;GO:0004842;GO:0005634;GO:0005634;GO:0005654;GO:0005654;GO:0005737;GO:0006281;GO:0006511;GO:0006511;GO:0006511;GO:0006974;GO:0006974;GO:0006974;GO:0008270;GO:0009790;GO:0016567;GO:0016567;GO:0016607;GO:0016607;GO:0016740;GO:0042787;GO:0042787;GO:0042787;GO:0045995;GO:0046966;GO:0061630;GO:1901315;GO:1901315;GO:1901315;GO:2000780;GO:2000780;GO:0009790;GO:0045995;	K10590	thyroid hormone receptor interactor 12 [Source:MGISymbol;Acc:MGI:1309481]
MGP_C57BL6NJ_G0016620	2148	46	1.74043	99	2.99599	70	1.49914	23	1.11823	27	1.32657	12	0.555351	1	89178849	89250027	+	2148	Fbxo36	GO:0003674;GO:0005575;	K10312	F-box protein 36 [Source:MGISymbol;Acc:MGI:1289192]
MGP_C57BL6NJ_G0016621	3352	10	0.242454	6	0.116355	3	0.0411714	25	0.778883	11	0.346329	8	0.23725	1	89255246	89294752	-	3352	Slc16a14	GO:0005886;GO:0005887;GO:0006810;GO:0008028;GO:0015293;GO:0015718;GO:0016020;GO:0016021;GO:0016021;GO:0055085;	K08190	solute carrier family 16 (monocarboxylic acidtransporters), member 14 [Source:MGISymbol;Acc:MGI:1919031]
MGP_C57BL6NJ_G0016622	372	0	0	0	0	0	0	0	0	0	0	0	0	1	89355395	89356061	+	372	G530012D18Rik	-	-	RIKEN cDNA G530012D1 gene [Source:MGISymbol;Acc:MGI:3642025]
MGP_C57BL6NJ_G0016623	495	0	0	0	0	0	0	0	0	0	0	0	0	1	89358944	89666247	-	495	-	-	#N/A	-
MGP_C57BL6NJ_G0016624	494	0	0	0	0	0	0	10	2.11402	16	3.41817	0	0	1	90056263	90061315	-	494	-	-	#N/A	-
MGP_C57BL6NJ_G0016625	7460	1265	13.7811	1223	10.6568	911	5.61769	3038	42.529	3888	55.0032	2448	32.6207	1	90088011	90223832	+	7460	-	-	K15413	-
MGP_C57BL6NJ_G0016626	399	0	0	0	0	0	0	0	0	0	0	0	0	1	90162700	90169642	+	399	-	-	-	-
MGP_C57BL6NJ_G0016627	391	0	0	0	0	0	0	0	0	0	0	0	0	1	90167295	90169699	+	391	-	-	-	-
MGP_C57BL6NJ_G0016628	2709	701	21.0302	488	11.7098	148	2.51322	589	22.7061	999	38.9186	658	24.1456	1	90230118	90292287	-	2709	A630001G21Rik	-	-	RIKEN cDNA A630001G21 gene [Source:MGISymbol;Acc:MGI:2443131]
MGP_C57BL6NJ_G0016629	7077	2796	32.1086	3869	35.5376	2764	17.9666	1930	28.4803	2314	34.5076	2128	29.8912	1	90308194	90368683	+	7077	Cab39	GO:0004674;GO:0005509;GO:0005622;GO:0005622;GO:0005737;GO:0005737;GO:0010800;GO:0018105;GO:0019900;GO:0023014;GO:0023014;GO:0030295;GO:0030295;GO:0032147;GO:0032147;GO:0035556;GO:0043539;GO:0070062;GO:0071902;	K08272	calcium binding protein 39 [Source:MGISymbol;Acc:MGI:107438]
MGP_C57BL6NJ_G0016630	2505	468	15.1835	1095	28.4148	6805	124.968	389	16.2173	406	17.1048	437	17.3418	1	90446302	90460710	+	2505	Itm2c	GO:0001540;GO:0001540;GO:0005524;GO:0005524;GO:0005764;GO:0005764;GO:0005764;GO:0005765;GO:0005794;GO:0005794;GO:0005886;GO:0005886;GO:0005886;GO:0007399;GO:0010977;GO:0016020;GO:0016021;GO:0030182;GO:0042985;GO:0048471;GO:0070062;GO:0070062;GO:2001238;GO:2001238;	K18265	integral membrane protein 2C [Source:MGISymbol;Acc:MGI:1927594]
MGP_C57BL6NJ_G0016631	3343	0	0	0	0	0	0	0	0	0	0	0	0	1	90481332	90493662	+	3343	4933407L21Rik	GO:0003674;GO:0005575;GO:0008150;	-	RIKEN cDNA 4933407L21 gene [Source:MGISymbol;Acc:MGI:1918391]
MGP_C57BL6NJ_G0016632	3722	62	1.35378	43	0.750984	48	0.593257	176	4.93825	178	5.04713	206	5.50189	1	90491355	90513985	-	3722	Gpr55	GO:0004871;GO:0004930;GO:0004930;GO:0004930;GO:0004949;GO:0004949;GO:0005886;GO:0005887;GO:0005887;GO:0005887;GO:0007165;GO:0007186;GO:0007186;GO:0007202;GO:0007202;GO:0007202;GO:0016020;GO:0016021;GO:0016021;GO:0035025;GO:0035025;GO:0035025;GO:0038171;GO:0045453;GO:0045671;GO:0051482;GO:0070374;GO:0070374;	K08413	G protein-coupled receptor 55 [Source:MGISymbol;Acc:MGI:2685064]
MGP_C57BL6NJ_G0016633	2041	0	0	0	0	0	0	0	0	0	0	1	0.0487055	1	90577766	90590908	+	2041	Spata3	-	-	spermatogenesis associated 3 [Source:MGISymbol;Acc:MGI:1917310]
MGP_C57BL6NJ_G0016634	3331	0	0	0	0	0	0	0	0	0	0	0	0	1	90607463	90616132	+	3331	2810459M11Rik	GO:0005515;GO:0005575;GO:0008150;	-	RIKEN cDNA 2810459M11 gene [Source:MGISymbol;Acc:MGI:1920042]
MGP_C57BL6NJ_G0016635	7265	2509	28.0672	3321	29.7147	3444	21.8075	1479	21.2603	1550	22.5163	1316	18.007	1	90625056	90706265	+	7265	Psmd1	GO:0000502;GO:0022624;	-	proteasome (prosome, macropain) 26S subunit, non-ATPase, 1 [Source:MGI Symbol;Acc:MGI:1917497]
MGP_C57BL6NJ_G0016636	2131	25	0.953433	31	0.945621	22	0.474917	18	0.882116	5	0.247621	0	0	1	90663165	90676109	-	2131	Htr2b	GO:0001755;GO:0001755;GO:0001819;GO:0001819;GO:0001938;GO:0001938;GO:0001938;GO:0001965;GO:0001965;GO:0002031;GO:0002031;GO:0003007;GO:0003007;GO:0003300;GO:0003300;GO:0004871;GO:0004930;GO:0004930;GO:0004930;GO:0004993;GO:0004993;GO:0004993;GO:0004993;GO:0004993;GO:0005096;GO:0005096;GO:0005654;GO:0005737;GO:0005737;GO:0005737;GO:0005886;GO:0005886;GO:0005886;GO:0005887;GO:0005887;GO:0006182;GO:…	K04157	5-hydroxytryptamine (serotonin) receptor 2B[Source:MGI Symbol;Acc:MGI:109323]
MGP_C57BL6NJ_G0016637	776	0	0	0	0	0	0	0	0	0	0	0	0	1	90699589	90729919	+	776	-	-	-	-
MGP_C57BL6NJ_G0016638	12992	133	0.831973	178	0.8906	374	1.32426	40	0.321529	94	0.763577	52	0.397876	1	90721867	90851891	+	12992	Armc9	-	K22864	armadillo repeat containing 9 [Source:MGISymbol;Acc:MGI:1926045]
MGP_C57BL6NJ_G0016639	4137	16	0.314317	52	0.817065	47	0.522625	7	0.176705	1	0.0255103	11	0.264319	1	90886034	90890507	+	4137	B3gnt7	-	K09664	UDP-GlcNAc:betaGal beta-1,3-N-acetylglucosaminyltransferase 7 [Source:MGISymbol;Acc:MGI:2384394]
MGP_C57BL6NJ_G0016640	10179	20673	165.056	18087	115.505	1302	5.88415	12601	129.281	11598	120.248	11332	110.668	1	90939536	90954212	-	10179	Ncl	GO:0001525;GO:0001650;GO:0001651;GO:0003676;GO:0003677;GO:0003697;GO:0003723;GO:0003723;GO:0003723;GO:0003723;GO:0005102;GO:0005509;GO:0005515;GO:0005515;GO:0005515;GO:0005634;GO:0005634;GO:0005634;GO:0005654;GO:0005654;GO:0005730;GO:0005730;GO:0005730;GO:0005730;GO:0005737;GO:0005737;GO:0005938;GO:0006897;GO:0008022;GO:0009986;GO:0016020;GO:0017148;GO:0030529;GO:0030529;GO:0032760;GO:0035368;GO:…	K11294	nucleolin [Source:MGI Symbol;Acc:MGI:97286]"
MGP_C57BL6NJ_G0016641	1322	0	0	0	0	0	0	5	0.39498	0	0	5	0.375975	1	90982449	90984351	-	1322	Nmur1	GO:0001607;GO:0001607;GO:0004871;GO:0004930;GO:0004930;GO:0005622;GO:0005886;GO:0005887;GO:0006816;GO:0006821;GO:0007165;GO:0007186;GO:0007186;GO:0007200;GO:0007202;GO:0007218;GO:0008188;GO:0016020;GO:0016021;GO:0016021;GO:0016021;GO:0019722;GO:0042924;GO:0048016;GO:1903955;	K05052	neuromedin U receptor 1 [Source:MGISymbol;Acc:MGI:1341898]
MGP_C57BL6NJ_G0016642	1724	0	0	0	0	0	0	0	0	0	0	0	0	1	91023674	91025397	+	1724	1700019O17Rik	GO:0003674;GO:0005737;GO:0005737;GO:0008150;	-	RIKEN cDNA 1700019O17 gene [Source:MGISymbol;Acc:MGI:1919113]
MGP_C57BL6NJ_G0016643	1622	6621	331.746	7566	303.218	2264	64.2102	5824	374.979	4950	322.074	5286	323.964	1	91144175	91148462	+	1622	-	-	-	-
MGP_C57BL6NJ_G0016644	2178	151	5.63446	267	7.96879	654	13.8133	227	10.8844	123	5.96002	170	7.75911	1	91165580	91206070	-	2178	Pde6d	GO:0005095;	K13758	phosphodiesterase 6D, cGMP-specific, rod, delta[Source:MGI Symbol;Acc:MGI:1270843]
MGP_C57BL6NJ_G0016645	5515	131	1.93045	188	2.2159	221	1.84342	74	1.40127	100	1.91362	93	1.67633	1	91206345	91234060	+	5515	Cops7b	GO:0000338;GO:0000338;GO:0003674;GO:0005634;GO:0005654;GO:0005737;GO:0008180;GO:0008180;GO:0008180;GO:0008180;	K12180	COP9 signalosome subunit 7B [Source:MGISymbol;Acc:MGI:1349388]
MGP_C57BL6NJ_G0016646	1042	0	0	0	0	0	0	0	0	0	0	0	0	1	91299085	91303365	-	1042	Nppc	GO:0001503;GO:0003418;GO:0003418;GO:0003419;GO:0003419;GO:0005102;GO:0005102;GO:0005179;GO:0005179;GO:0005179;GO:0005184;GO:0005576;GO:0005576;GO:0005576;GO:0005615;GO:0006182;GO:0006182;GO:0006182;GO:0006457;GO:0007168;GO:0007168;GO:0008285;GO:0009791;GO:0009791;GO:0010469;GO:0010753;GO:0019934;GO:0022414;GO:0022414;GO:0030141;GO:0030814;GO:0030823;GO:0032966;GO:0032991;GO:0040014;GO:0040014;GO:…	K12336	natriuretic peptide type C [Source:MGISymbol;Acc:MGI:97369]
MGP_C57BL6NJ_G0016647	8861	289	2.65063	484	3.5506	505	2.62172	250	2.94641	429	5.10946	302	3.38801	1	91341021	91732842	+	8861	Dis3l2	GO:0000175;GO:0000287;GO:0005737;GO:0008266;GO:0010587;GO:0019827;	K18758	DIS3 like 3'-5' exoribonuclease 2 [Source:MGISymbol;Acc:MGI:2442555]
MGP_C57BL6NJ_G0016648	2256	0	0	0	0	0	0	0	0	0	0	0	0	1	91770114	91773348	-	2256	Alppl2	GO:0003824;GO:0004035;GO:0004035;GO:0004035;GO:0005886;GO:0005886;GO:0008152;GO:0016020;GO:0016311;GO:0016787;GO:0016791;GO:0030016;GO:0030016;GO:0031225;GO:0046872;	K01077	alkaline phosphatase, placental-like 2 [Source:MGISymbol;Acc:MGI:108009]
MGP_C57BL6NJ_G0016649	2337	32	1.11282	0	0	0	0	9	0.40218	9	0.406429	8	0.340292	1	91780390	91783994	-	2337	Alpi	GO:0000287;GO:0003824;GO:0004035;GO:0004035;GO:0005886;GO:0006793;GO:0008152;GO:0008270;GO:0009897;GO:0009986;GO:0016311;GO:0016311;GO:0016787;GO:0016791;GO:0042803;GO:0071773;GO:0071773;	K01077	alkaline phosphatase, intestinal [Source:MGISymbol;Acc:MGI:1924018]
MGP_C57BL6NJ_G0016650	2099	11	0.425906	0	0	0	0	7	0.348275	2	0.100558	6	0.284158	1	91807480	91810419	+	2099	Akp3	-	K01077	alkaline phosphatase 3, intestine, not Mn requiring[Source:MGI Symbol;Acc:MGI:87984]
MGP_C57BL6NJ_G0016651	3500	0	0	0	0	2	0.0262869	0	0	0	0	0	0	1	91823498	91832364	-	3500	Ecel1	GO:0003016;GO:0003016;GO:0004222;GO:0004222;GO:0004222;GO:0005622;GO:0005887;GO:0006508;GO:0006508;GO:0007218;GO:0007218;GO:0008233;GO:0008237;GO:0008237;GO:0016020;GO:0016021;GO:0016787;GO:0035556;GO:0046872;	K09610	endothelin converting enzyme-like 1 [Source:MGISymbol;Acc:MGI:1343461]
MGP_C57BL6NJ_G0016652	2180	0	0	0	0	0	0	0	0	0	0	0	0	1	91859241	91864333	+	2180	Prss56	GO:0004252;GO:0004252;GO:0004252;GO:0005615;GO:0005783;GO:0005783;GO:0005789;GO:0006508;GO:0006508;GO:0006508;GO:0008233;GO:0008236;GO:0016020;GO:0016787;GO:0043010;GO:0043010;	-	protease, serine 56 [Source:MGISymbol;Acc:MGI:1916703]
MGP_C57BL6NJ_G0016653	3288	0	0	0	0	0	0	0	0	0	0	0	0	1	91866535	91875815	+	3288	Chrnd	GO:0005886;GO:0005892;GO:0022848;GO:0042166;GO:0042391;	K04816	cholinergic receptor, nicotinic, delta polypeptide[Source:MGI Symbol;Acc:MGI:87893]
MGP_C57BL6NJ_G0016654	4163	0	0	0	0	0	0	0	0	0	0	0	0	1	91880402	91888439	+	4163	Chrng	GO:0004888;GO:0005216;GO:0005230;GO:0005886;GO:0006810;GO:0006811;GO:0006811;GO:0007165;GO:0016020;GO:0016021;GO:0016021;GO:0022848;GO:0030054;GO:0034220;GO:0034220;GO:0045202;GO:0045211;GO:0045211;GO:0055085;GO:0060078;GO:0060079;	-	cholinergic receptor, nicotinic, gamma polypeptide[Source:MGI Symbol;Acc:MGI:87895]
MGP_C57BL6NJ_G0016655	7473	1244	13.5288	1901	16.5358	2474	15.2294	867	12.116	966	13.6422	967	12.8633	1	91889607	91916154	+	7473	Eif4e2	GO:0001701;GO:0003723;GO:0003723;GO:0003723;GO:0003743;GO:0003743;GO:0005737;GO:0005845;GO:0005845;GO:0006412;GO:0006413;GO:0006413;GO:0006417;GO:0017148;GO:0031625;GO:0001701;	-	eukaryotic translation initiation factor 4E member2 [Source:MGI Symbol;Acc:MGI:1914440]
MGP_C57BL6NJ_G0016656	2125	10	0.38245	10	0.3059	0	0	0	0	0	0	0	0	1	91939714	91985868	+	2125	Efhd1	GO:0005509;GO:0005739;GO:0005739;GO:0005743;GO:0005743;GO:0016020;GO:0031175;GO:0046872;GO:0070062;GO:0005739;GO:0005743;GO:0031175;	-	EF hand domain containing 1 [Source:MGISymbol;Acc:MGI:1921607]
MGP_C57BL6NJ_G0016657	14216	2770	15.8356	2877	13.1553	842	2.72466	1830	13.4434	1926	14.2981	2002	13.9993	1	92002000	92131124	+	14216	Gigyf2	GO:0005737;GO:0007631;GO:0008344;GO:0009791;GO:0016021;GO:0021522;GO:0031571;GO:0031982;GO:0035264;GO:0043204;GO:0044267;GO:0048009;GO:0048873;GO:0050881;GO:0050885;GO:1990635;	K18730	GRB10 interacting GYF protein 2 [Source:MGISymbol;Acc:MGI:2138584]
MGP_C57BL6NJ_G0016658	1270	0	0	0	0	0	0	0	0	0	0	0	0	1	92062943	92071309	-	1270	Kcnj13	GO:0005242;GO:0005242;GO:0005244;GO:0005887;GO:0006810;GO:0006811;GO:0006813;GO:0006813;GO:0010107;GO:0016020;GO:0016020;GO:0016021;GO:0016021;GO:0034220;GO:0034765;GO:0071805;GO:0098655;	K05006	potassium inwardly-rectifying channel, subfamily J,member 13 [Source:MGI Symbol;Acc:MGI:3781032]
MGP_C57BL6NJ_G0016659	665	0	0	0	0	0	0	0	0	0	0	0	0	1	92143268	92148422	+	665	3110079O15Rik	GO:0003674;GO:0005515;GO:0005576;GO:0005578;GO:0005737;GO:0008150;GO:0016020;GO:0016021;GO:0031012;GO:0031012;GO:0051216;GO:0051216;GO:0051216;GO:0071944;GO:0071944;GO:0071944;GO:0071944;	-	RIKEN cDNA 3110079O15 gene [Source:MGISymbol;Acc:MGI:1920484]
MGP_C57BL6NJ_G0016660	3905	6	0.124872	5	0.0832315	0	0	0	0	0	0	0	0	1	92149776	92243786	-	3905	Ngef	GO:0005085;GO:0005085;GO:0005089;GO:0005515;GO:0005737;GO:0005829;GO:0007275;GO:0007399;GO:0009987;GO:0016020;GO:0030154;GO:0030426;GO:0035023;GO:0042995;GO:0043087;GO:0046875;GO:0048013;GO:0061002;GO:0065009;	K07525	neuronal guanine nucleotide exchange factor[Source:MGI Symbol;Acc:MGI:1858414]
MGP_C57BL6NJ_G0016661	2590	0	0	0	0	1	0.0177615	0	0	0	0	0	0	1	92183040	92266966	+	2590	Neu2	GO:0004308;GO:0004308;GO:0004308;GO:0004308;GO:0005737;GO:0005737;GO:0005737;GO:0005829;GO:0005975;GO:0006629;GO:0006689;GO:0006689;GO:0006689;GO:0008152;GO:0009313;GO:0009313;GO:0009313;GO:0010831;GO:0016020;GO:0016042;GO:0016787;GO:0016798;GO:0043231;GO:0045663;GO:0051692;GO:0052794;GO:0052794;GO:0052795;GO:0052796;GO:1902494;	-	neuraminidase 2 [Source:MGISymbol;Acc:MGI:1344417]
MGP_C57BL6NJ_G0016662	1031	0	0	0	0	0	0	0	0	0	0	0	0	1	92213716	92214746	-	1031	-	-	-	-
MGP_C57BL6NJ_G0016663	7510	2714	29.37	3815	33.0212	6214	38.0636	2469	34.3335	2770	38.9261	2717	35.9642	1	92287740	92394361	+	7510	Inpp5d	GO:0004445;GO:0008285;GO:0008340;GO:0009968;GO:0016064;GO:0017124;GO:0030853;GO:0030889;GO:0034594;GO:0035556;GO:0043065;GO:0045409;GO:0045579;GO:0045621;GO:0045648;GO:0045656;GO:0045659;GO:0045671;GO:0045779;GO:0050777;GO:0050869;GO:0051425;	K03084	inositol polyphosphate-5-phosphatase D [Source:MGISymbol;Acc:MGI:107357]
MGP_C57BL6NJ_G0016664	9620	400	3.37924	653	4.41242	797	3.8112	269	2.92021	450	4.93672	273	2.82103	1	92431908	92472129	+	9620	Atg16l1	GO:0000045;GO:0000045;GO:0000421;GO:0000421;GO:0005515;GO:0005515;GO:0005515;GO:0005737;GO:0005776;GO:0005829;GO:0005930;GO:0006810;GO:0006914;GO:0015031;GO:0016020;GO:0034045;GO:0034497;GO:0039689;GO:0039689;GO:0042802;GO:0051020;GO:0061739;GO:0098792;GO:0000421;GO:0005776;GO:0005930;GO:0034497;GO:0039689;GO:0061739;GO:0098792;	-	autophagy related 16-like 1 (S. cerevisiae)[Source:MGI Symbol;Acc:MGI:1924290]
MGP_C57BL6NJ_G0016665	8758	0	0	4	0.0296889	0	0	7	0.0834698	3	0.0361507	1	0.0113505	1	92483381	92536140	+	8758	Sag	GO:0001750;GO:0001917;GO:0002046;GO:0051219;	K19627	S-antigen, retina and pineal gland (arrestin)[Source:MGI Symbol;Acc:MGI:98227]
MGP_C57BL6NJ_G0016666	6850	1027	12.1847	1419	13.4658	2321	15.587	706	10.7634	945	14.5594	648	9.40384	1	92544168	92646125	+	6850	Dgkd	GO:0000166;GO:0003951;GO:0004143;GO:0004143;GO:0004143;GO:0005524;GO:0005737;GO:0005829;GO:0005886;GO:0007165;GO:0007205;GO:0008152;GO:0010033;GO:0016301;GO:0016301;GO:0016310;GO:0016310;GO:0016740;GO:0031410;GO:0035556;GO:0042802;GO:0042803;GO:0042803;GO:0046339;GO:0046982;GO:0046982;GO:0051260;	K00901	diacylglycerol kinase, delta [Source:MGISymbol;Acc:MGI:2138334]
MGP_C57BL6NJ_G0016667	11867	1020	6.98542	1275	6.98406	411	1.59323	727	6.39779	864	7.68376	782	6.55068	1	92646064	92714313	-	11867	Usp40	GO:0004197;GO:0004843;GO:0005829;GO:0006508;GO:0006511;GO:0008233;GO:0008234;GO:0016579;GO:0016579;GO:0016787;GO:0031647;GO:0036459;GO:0036459;	-	ubiquitin specific peptidase 40 [Source:MGISymbol;Acc:MGI:2443184]
MGP_C57BL6NJ_G0016668	1020	0	0	0	0	3	0.1353	0	0	2	0.206933	0	0	1	92730997	92732016	+	1020	-	-	-	-
MGP_C57BL6NJ_G0016669	2193	0	0	0	0	0	0	0	0	0	0	0	0	1	92770204	92996661	+	2193	Ugt1a10	GO:0004857;GO:0005080;GO:0005496;GO:0005504;GO:0005783;GO:0008144;GO:0008152;GO:0008194;GO:0015020;GO:0015020;GO:0015020;GO:0016020;GO:0016020;GO:0016021;GO:0016740;GO:0016757;GO:0016758;GO:0019899;GO:0042803;GO:0043086;GO:0043231;GO:0046982;GO:0052696;GO:0052697;GO:0070062;	-	UDP glycosyltransferase 1 family, polypeptide A10[Source:MGI Symbol;Acc:MGI:3580642]
MGP_C57BL6NJ_G0016670	2116	0	0	0	0	0	0	0	0	0	0	0	0	1	92790594	92996654	+	2116	Ugt1a9	GO:0004857;GO:0005080;GO:0005496;GO:0005504;GO:0005783;GO:0005783;GO:0005789;GO:0008144;GO:0008152;GO:0008194;GO:0015020;GO:0015020;GO:0015020;GO:0016020;GO:0016020;GO:0016021;GO:0016740;GO:0016757;GO:0016758;GO:0019899;GO:0042803;GO:0043086;GO:0043231;GO:0043231;GO:0046982;GO:0052696;GO:0052697;GO:0070062;	K00699	UDP glucuronosyltransferase 1 family, polypeptideA9 [Source:MGI Symbol;Acc:MGI:3576092]
MGP_C57BL6NJ_G0016671	2153	0	0	0	0	0	0	0	0	0	0	0	0	1	92818567	92996661	+	2153	Ugt1a8	GO:0008152;GO:0008194;GO:0015020;GO:0015020;GO:0016020;GO:0016021;GO:0016740;GO:0016757;GO:0016758;GO:0043231;GO:0052696;GO:0052697;	K00699	UDP glucuronosyltransferase 1 family, polypeptideA8 [Source:MGI Symbol;Acc:MGI:3576090]
MGP_C57BL6NJ_G0016672	3843	2031	42.951	1950	32.984	6339	75.8802	1886	51.2516	1723	47.3168	1932	49.9756	1	92825457	92997357	+	3843	-	-	-	-
MGP_C57BL6NJ_G0016673	2308	0	0	0	0	0	0	5	0.226241	0	0	0	0	1	92842928	92996660	+	2308	-	-	K00699	-
MGP_C57BL6NJ_G0016674	2223	0	0	0	0	0	0	0	0	0	0	0	0	1	92846034	92996654	+	2223	-	-	K00699	-
MGP_C57BL6NJ_G0016675	2129	0	0	13	0.396923	1	0.0216074	13	0.637682	45	2.23068	9	0.420231	1	92929800	92996654	+	2129	Ugt1a5	GO:0005783;GO:0008152;GO:0008194;GO:0015020;GO:0015020;GO:0015020;GO:0016020;GO:0016021;GO:0016740;GO:0016757;GO:0016758;GO:0019899;GO:0042803;GO:0043231;GO:0046982;GO:0052695;GO:0052696;GO:0052697;	K00699	UDP glucuronosyltransferase 1 family, polypeptideA5 [Source:MGI Symbol;Acc:MGI:3032634]
MGP_C57BL6NJ_G0016676	2137	21	0.798635	9	0.273764	2	0.043053	0	0	9	0.444466	6	0.279105	1	92976604	92996654	+	2137	Ugt1a2	GO:0001972;GO:0005783;GO:0005783;GO:0005789;GO:0008152;GO:0008194;GO:0015020;GO:0015020;GO:0015020;GO:0016020;GO:0016021;GO:0016740;GO:0016757;GO:0016758;GO:0019899;GO:0042803;GO:0043231;GO:0043231;GO:0046982;GO:0052695;GO:0052696;GO:0052696;GO:0052697;GO:0052697;	K00699	UDP glucuronosyltransferase 1 family, polypeptideA2 [Source:MGI Symbol;Acc:MGI:3576049]
MGP_C57BL6NJ_G0016677	1051	0	0	0	0	3	0.13131	1	0.0993651	0	0	1	0.0945841	1	92980732	92981782	-	1051	Dnajb3	-	K09509	DnaJ heat shock protein family (Hsp40) member B3[Source:MGI Symbol;Acc:MGI:1306822]
MGP_C57BL6NJ_G0016678	2139	0	0	0	0	12	0.258077	12	0.585878	23	1.1348	0	0	1	92988097	92996654	+	2139	-	-	-	-
MGP_C57BL6NJ_G0016680	6879	350	4.13501	456	4.30902	388	2.59468	247	3.7498	348	5.33894	293	4.23412	1	93088347	93116688	-	6879	Hjurp	GO:0005634;GO:0042393;	-	Holliday junction recognition protein [Source:MGISymbol;Acc:MGI:2685821]
MGP_C57BL6NJ_G0016681	4561	0	0	0	0	0	0	0	0	0	0	0	0	1	93184362	93274886	+	4561	Trpm8	GO:0005216;GO:0005262;GO:0005515;GO:0005886;GO:0005886;GO:0006810;GO:0006811;GO:0006812;GO:0006816;GO:0006874;GO:0009266;GO:0009409;GO:0009897;GO:0016020;GO:0016020;GO:0016021;GO:0016021;GO:0016021;GO:0016048;GO:0034220;GO:0042803;GO:0045121;GO:0050896;GO:0050951;GO:0050955;GO:0051289;GO:0070207;GO:0070588;GO:0120162;GO:0005216;GO:0005262;GO:0006816;GO:0006874;GO:0009266;GO:0009409;GO:0009897;GO:…	K04983	transient receptor potential cation channel,subfamily M, member 8 [Source:MGI Symbol;Acc:MGI:2181435]
MGP_C57BL6NJ_G0016682	759	0	0	0	0	0	0	0	0	0	0	0	0	1	93293452	93312708	+	759	Spp2	GO:0003674;GO:0005576;GO:0005576;GO:0031012;GO:0032991;GO:0046849;GO:0065003;GO:0070062;	-	secreted phosphoprotein 2 [Source:MGISymbol;Acc:MGI:1922646]
MGP_C57BL6NJ_G0016683	1948	4	0.16688	15	0.500543	24	0.566762	19	1.01859	16	0.866826	8	0.408246	1	93397314	93407472	-	1948	Glrp1	GO:0000122;GO:0000122;GO:0003674;GO:0005634;GO:0005634;	-	glutamine repeat protein 1 [Source:MGISymbol;Acc:MGI:108038]
MGP_C57BL6NJ_G0016684	5492	1341	19.8441	2396	28.3593	3165	26.5107	1513	28.7703	1618	31.092	1714	31.0242	1	93596257	93641385	-	5492	Arl4c	GO:0000166;GO:0005525;GO:0005525;GO:0005525;GO:0005622;GO:0005737;GO:0005737;GO:0005737;GO:0005829;GO:0005886;GO:0005886;GO:0005886;GO:0006810;GO:0006886;GO:0007264;GO:0016020;GO:0016192;GO:0030175;GO:0032456;GO:0032456;GO:0032456;GO:0042995;GO:0043014;GO:0043014;	K07945	ADP-ribosylation factor-like 4C [Source:MGISymbol;Acc:MGI:2445172]
MGP_C57BL6NJ_G0016685	4989	182	2.96477	327	4.26062	988	9.11007	90	1.88393	129	2.72883	167	3.32754	1	94035765	94122648	+	4989	Sh3bp4	GO:0005092;GO:0005092;GO:0005634;GO:0005737;GO:0005737;GO:0005737;GO:0005905;GO:0006897;GO:0008285;GO:0008285;GO:0010508;GO:0010508;GO:0016020;GO:0017016;GO:0017016;GO:0030136;GO:0030308;GO:0030308;GO:0031410;GO:0032007;GO:0032007;GO:0032007;GO:0034260;GO:0034260;GO:0042802;GO:0050790;GO:0050790;GO:0061462;GO:0061462;GO:0070062;GO:0071230;GO:0071230;	K20066	SH3-domain binding protein 4 [Source:MGISymbol;Acc:MGI:2138297]
MGP_C57BL6NJ_G0016686	17559	3227	14.9359	4658	17.244	5479	14.3542	1259	7.48794	1208	7.26052	1297	7.34279	1	94433924	94897897	+	17559	Agap1	GO:0000166;GO:0003924;GO:0003924;GO:0005096;GO:0005096;GO:0005525;GO:0005525;GO:0005543;GO:0005634;GO:0005737;GO:0005829;GO:0006810;GO:0007165;GO:0015031;GO:0016020;GO:0043547;GO:0046872;	K12491	ArfGAP with GTPase domain, ankyrin repeat and PHdomain 1 [Source:MGI Symbol;Acc:MGI:2653690]
MGP_C57BL6NJ_G0016687	2177	0	0	0	0	0	0	7	0.335796	0	0	0	0	1	94929916	94933127	-	2177	Gbx2	GO:0000977;GO:0000977;GO:0000979;GO:0000979;GO:0001190;GO:0001190;GO:0001228;GO:0001228;GO:0001569;GO:0001569;GO:0001755;GO:0001755;GO:0003677;GO:0003677;GO:0005634;GO:0005634;GO:0005634;GO:0006351;GO:0006355;GO:0006355;GO:0006366;GO:0007411;GO:0007411;GO:0008283;GO:0008283;GO:0021549;GO:0021549;GO:0021555;GO:0021555;GO:0021568;GO:0021568;GO:0021794;GO:0021794;GO:0021884;GO:0021884;GO:0021930;GO:…	K09321	gastrulation brain homeobox 2 [Source:MGISymbol;Acc:MGI:95668]
MGP_C57BL6NJ_G0016688	3746	0	0	0	0	0	0	0	0	0	0	0	0	1	94953583	95025747	-	3746	Asb18	GO:0000151;GO:0004842;GO:0005622;GO:0005634;GO:0005737;GO:0008150;GO:0016567;GO:0031625;GO:0035556;	K10340	ankyrin repeat and SOCS box-containing 18[Source:MGI Symbol;Acc:MGI:2655109]
MGP_C57BL6NJ_G0016689	4054	0	0	0	0	0	0	0	0	0	0	0	0	1	95054833	95180502	-	4054	Iqca	GO:0000166;GO:0003674;GO:0005524;GO:0005524;GO:0005575;GO:0005737;GO:0005856;GO:0005929;GO:0008150;GO:0031514;GO:0042995;	-	IQ motif containing with AAA domain [Source:MGISymbol;Acc:MGI:1922168]
MGP_C57BL6NJ_G0016690	3348	5	0.121372	37	0.718381	0	0	15	0.467888	0	0	23	0.68291	1	95233942	95246709	+	3348	Ackr3	GO:0001525;GO:0001570;GO:0004871;GO:0004930;GO:0004930;GO:0005044;GO:0005044;GO:0005634;GO:0005737;GO:0005737;GO:0005768;GO:0005768;GO:0005769;GO:0005886;GO:0005886;GO:0005905;GO:0005905;GO:0006935;GO:0006935;GO:0006955;GO:0007155;GO:0007165;GO:0007186;GO:0007186;GO:0007204;GO:0007275;GO:0009897;GO:0009986;GO:0009986;GO:0015026;GO:0016020;GO:0016021;GO:0016021;GO:0016493;GO:0016494;GO:0019722;GO:…	K04304	atypical chemokine receptor 3 [Source:MGISymbol;Acc:MGI:109562]
MGP_C57BL6NJ_G0016691	3927	400	8.27814	469	7.76338	1247	14.6078	356	9.46729	232	6.23488	387	9.7965	1	95652886	95662781	+	3927	Cops8	GO:0000338;GO:0000338;GO:0005634;GO:0005634;GO:0005634;GO:0005654;GO:0005737;GO:0005829;GO:0006468;GO:0007250;GO:0008180;GO:0008180;GO:0008180;GO:0008180;GO:0008180;GO:0008285;GO:0010387;GO:0048471;GO:0070062;	K12181	COP9 signalosome subunit 8 [Source:MGISymbol;Acc:MGI:1915363]
MGP_C57BL6NJ_G0016692	11963	5265	35.7678	8512	46.252	30	0.115361	505	4.40847	40	0.352875	178	1.47911	1	95833719	95920221	-	11963	Col6a3	GO:0003429;GO:0004867;GO:0005576;GO:0005578;GO:0005581;GO:0005615;GO:0005615;GO:0010951;GO:0030020;GO:0031012;GO:0031012;GO:0042383;GO:0062023;GO:0070062;GO:1903561;GO:0005578;GO:0005581;GO:0005615;GO:0031012;GO:0042383;	-	collagen, type VI, alpha 3 [Source:MGISymbol;Acc:MGI:88461]
MGP_C57BL6NJ_G0016693	4982	3	0.0489385	31	0.40448	16	0.147739	2	0.041924	0	0	6	0.11972	1	96002734	96038398	+	4982	Mlph	GO:0006886;GO:0017137;GO:0046872;	K22235	melanophilin [Source:MGI Symbol;Acc:MGI:2176380]"
MGP_C57BL6NJ_G0016694	276	0	0	0	0	0	0	0	0	0	0	0	0	1	96040364	96041283	+	276	Prlh	GO:0001894;GO:0001894;GO:0002021;GO:0002021;GO:0002023;GO:0005179;GO:0005184;GO:0005737;GO:0006112;GO:0006112;GO:0006629;GO:0006629;GO:0007186;GO:0007631;GO:0009749;GO:0009749;GO:0010469;GO:0031861;GO:0032868;GO:0032868;GO:0040014;GO:0040014;GO:0042755;GO:0042755;GO:0043434;GO:0043434;GO:0045444;GO:0045444;GO:0048483;GO:0048483;	K05269	prolactin releasing hormone [Source:MGISymbol;Acc:MGI:3644668]
MGP_C57BL6NJ_G0016695	1992	0	0	0	0	1	0.0230935	0	0	0	0	0	0	1	96046632	96058083	-	1992	Rab17	GO:0000166;GO:0002415;GO:0002415;GO:0003924;GO:0003924;GO:0003924;GO:0005515;GO:0005525;GO:0005525;GO:0005622;GO:0005768;GO:0005768;GO:0005769;GO:0005886;GO:0006810;GO:0006886;GO:0015031;GO:0016020;GO:0016323;GO:0016323;GO:0016324;GO:0016324;GO:0019003;GO:0019003;GO:0030100;GO:0030139;GO:0030425;GO:0030425;GO:0032401;GO:0032401;GO:0032402;GO:0032402;GO:0032456;GO:0032456;GO:0032456;GO:0032482;GO:…	K07909	RAB17, member RAS oncogene family [Source:MGISymbol;Acc:MGI:104640]
MGP_C57BL6NJ_G0016696	5582	3617	52.6614	4676	54.4532	1065	8.77684	2447	45.7805	2437	46.0751	2160	38.4667	1	96083684	96220775	+	5582	Lrrfip1	GO:0000122;GO:0000978;GO:0001078;GO:0003677;GO:0003677;GO:0005515;GO:0005515;GO:0005634;GO:0005737;GO:0005829;GO:0005886;GO:0006351;GO:0006355;GO:0006355;GO:0042803;GO:0045296;GO:0051092;GO:0051092;	-	leucine rich repeat (in FLII) interacting protein 1[Source:MGI Symbol;Acc:MGI:1342770]
MGP_C57BL6NJ_G0016697	6518	0	0	0	0	0	0	0	0	5	0.0809574	19	0.289774	1	96236516	96267670	+	6518	Rbm44	GO:0005737;GO:0042803;GO:0045171;	-	RNA binding motif protein 44 [Source:MGISymbol;Acc:MGI:2685663]
MGP_C57BL6NJ_G0016698	3022	20	0.53786	29	0.623796	74	1.12646	23	0.794822	24	0.838142	12	0.394737	1	96276687	96321704	+	3022	Ramp1	GO:0001525;GO:0001525;GO:0001635;GO:0004872;GO:0004948;GO:0005615;GO:0005622;GO:0005886;GO:0006810;GO:0006816;GO:0006816;GO:0006886;GO:0007186;GO:0007186;GO:0007189;GO:0008277;GO:0008277;GO:0008565;GO:0008565;GO:0008565;GO:0009986;GO:0009986;GO:0015026;GO:0015026;GO:0015031;GO:0015031;GO:0016020;GO:0016021;GO:0016021;GO:0030816;GO:0030819;GO:0031623;GO:0031623;GO:0031716;GO:0032870;GO:0043235;GO:…	-	receptor (calcitonin) activity modifying protein 1[Source:MGI Symbol;Acc:MGI:1858418]
MGP_C57BL6NJ_G0016699	8835	1229	11.3052	1736	12.7727	2006	10.4449	1152	13.617	1265	15.1107	1140	12.8268	1	96348535	96388671	+	8835	Ube2f	GO:0019788;GO:0045116;	K10687	ubiquitin-conjugating enzyme E2F (putative)[Source:MGI Symbol;Acc:MGI:1915171]
MGP_C57BL6NJ_G0016700	4549	235	4.19842	558	7.97365	1949	19.7094	486	11.1572	438	10.1615	487	10.6423	1	96398100	96423847	+	4549	Scly	GO:0003824;	K01763	selenocysteine lyase [Source:MGISymbol;Acc:MGI:1355310]
MGP_C57BL6NJ_G0016701	5440	0	0	0	0	0	0	0	0	0	0	0	0	1	96424847	96452570	+	5440	Espnl	GO:0003779;GO:0005515;GO:0005737;GO:0007605;GO:0007605;GO:0031941;GO:0032420;GO:0032426;GO:0032426;GO:0032426;GO:0042995;GO:0051015;GO:0051015;GO:0051015;GO:0051017;	-	espin-like [Source:MGI Symbol;Acc:MGI:2685402]"
MGP_C57BL6NJ_G0016702	3089	0	0	0	0	0	0	0	0	0	0	0	0	1	96455280	96466658	+	3089	Klhl30	GO:0004842;GO:0016567;GO:0031463;	K10466	kelch-like 30 [Source:MGI Symbol;Acc:MGI:1918038]"
MGP_C57BL6NJ_G0016703	2815	1	0.0288706	0	0	0	0	0	0	0	0	0	0	1	96470672	96478459	+	2815	Fam132b	GO:0005179;GO:0005179;GO:0005179;GO:0005576;GO:0005576;GO:0005615;GO:0005615;GO:0005615;GO:0005623;GO:0006879;GO:0006879;GO:0006879;GO:0010469;GO:0019217;GO:0019217;GO:0042803;GO:0042803;GO:2000193;GO:2000193;	-	family with sequence similarity 132, member B[Source:MGI Symbol;Acc:MGI:3606476]
MGP_C57BL6NJ_G0016704	5556	402	5.88027	506	5.92007	471	3.89975	220	4.1352	195	3.70402	244	4.36565	1	96478103	96503244	-	5556	Ilkap	GO:0003824;GO:0004721;GO:0004722;GO:0004722;GO:0005575;GO:0005634;GO:0005654;GO:0005737;GO:0005829;GO:0006470;GO:0006470;GO:0007229;GO:0016301;GO:0016310;GO:0016787;GO:0033262;GO:0043169;GO:0046872;	-	integrin-linked kinase-associated serine/threoninephosphatase 2C [Source:MGI Symbol;Acc:MGI:1914694]
MGP_C57BL6NJ_G0016705	1808	6	0.269703	99	3.55939	236	6.00471	30	1.73284	18	1.05069	18	0.98968	1	96515904	96518459	-	1808	Hes6	GO:0000122;GO:0000977;GO:0001227;GO:0003700;GO:0003712;GO:0005667;GO:0006357;GO:0007399;GO:0030154;	K09087	hairy and enhancer of split 6 [Source:MGISymbol;Acc:MGI:1859852]
MGP_C57BL6NJ_G0016706	5856	151	2.0956	217	2.40878	72	0.5656	83	1.48018	76	1.36966	63	1.06945	1	96520397	96563842	-	5856	Per2	-	K02633	period circadian clock 2 [Source:MGISymbol;Acc:MGI:1195265]
MGP_C57BL6NJ_G0016707	3712	278	6.08654	167	2.92447	63	0.780748	153	4.30447	167	4.74798	117	3.13328	1	96593991	96630006	+	3712	Traf3ip1	GO:0000122;GO:0001738;GO:0001738;GO:0001738;GO:0001822;GO:0001822;GO:0001933;GO:0005102;GO:0005515;GO:0005515;GO:0005737;GO:0005813;GO:0005813;GO:0005813;GO:0005829;GO:0005856;GO:0005929;GO:0005929;GO:0005929;GO:0005929;GO:0005929;GO:0005930;GO:0005930;GO:0008017;GO:0008017;GO:0015630;GO:0015631;GO:0021532;GO:0021532;GO:0030030;GO:0030992;GO:0030992;GO:0030992;GO:0030992;GO:0031076;GO:0031076;GO:…	K19680	TRAF3 interacting protein 1 [Source:MGISymbol;Acc:MGI:1921269]
MGP_C57BL6NJ_G0016708	6432	20	0.252707	84	0.84893	302	2.15993	43	0.698166	28	0.459423	18	0.278194	1	96642870	96664149	+	6432	Asb1	GO:0000151;GO:0005622;GO:0007275;GO:0016567;GO:0016567;GO:0030539;GO:0030539;GO:0035556;GO:0061630;	K10323	ankyrin repeat and SOCS box-containing 1[Source:MGI Symbol;Acc:MGI:1929735]
MGP_C57BL6NJ_G0016709	3174	60	1.53631	53	1.08544	0	0	0	0	0	0	11	0.344514	1	96921163	96967428	+	3174	Twist2	GO:0046983;	K09069	twist basic helix-loop-helix transcription factor 2[Source:MGI Symbol;Acc:MGI:104685]
MGP_C57BL6NJ_G0016710	15365	390	2.06284	855	3.6172	502	1.50297	265	1.80115	276	1.89573	254	1.64332	1	97051664	97301862	-	15365	Hdac4	GO:0000118;GO:0000118;GO:0000122;GO:0000122;GO:0000978;GO:0001025;GO:0001047;GO:0001085;GO:0001501;GO:0001501;GO:0002076;GO:0002076;GO:0003677;GO:0003677;GO:0003682;GO:0003682;GO:0003714;GO:0003714;GO:0004407;GO:0004407;GO:0004407;GO:0005515;GO:0005515;GO:0005515;GO:0005634;GO:0005634;GO:0005634;GO:0005634;GO:0005654;GO:0005654;GO:0005737;GO:0005737;GO:0005737;GO:0005737;GO:0005829;GO:0005829;GO:…	K11406	histone deacetylase 4 [Source:MGISymbol;Acc:MGI:3036234]
MGP_C57BL6NJ_G0016711	3331	1131	27.5944	1095	21.3687	3154	43.5577	571	17.9018	551	17.4573	595	17.7567	1	97582045	97616816	-	3331	Ndufa10	GO:0005737;GO:0005739;GO:0005739;GO:0005739;GO:0005739;GO:0005739;GO:0005747;GO:0005747;GO:0005747;GO:0005747;GO:0005759;GO:0006120;GO:0006120;GO:0006120;GO:0006120;GO:0008137;GO:0008137;GO:0032981;GO:0032981;GO:0043209;GO:0043209;GO:0055114;GO:0070469;	K03954	NADH dehydrogenase (ubiquinone) 1 alpha subcomplex10 [Source:MGI Symbol;Acc:MGI:1914523]
MGP_C57BL6NJ_G0016712	1076	0	0	0	0	0	0	0	0	0	0	0	0	1	97624878	97649308	-	1076	Olfr1416	GO:0004871;GO:0004930;GO:0004930;GO:0004984;GO:0004984;GO:0004984;GO:0005549;GO:0005886;GO:0007165;GO:0007186;GO:0007186;GO:0007186;GO:0007186;GO:0007608;GO:0007608;GO:0007608;GO:0016020;GO:0016021;GO:0016021;GO:0016021;GO:0050896;GO:0050911;	K04257	olfactory receptor 1416 [Source:MGISymbol;Acc:MGI:3031250]
MGP_C57BL6NJ_G0016713	1046	0	0	0	0	0	0	0	0	0	0	0	0	1	97668205	97677115	-	1046	Olfr1414	GO:0004871;GO:0004930;GO:0004930;GO:0004984;GO:0004984;GO:0004984;GO:0005549;GO:0005886;GO:0007165;GO:0007186;GO:0007186;GO:0007186;GO:0007186;GO:0007608;GO:0007608;GO:0007608;GO:0016020;GO:0016021;GO:0016021;GO:0016021;GO:0050896;GO:0050911;	K04257	olfactory receptor 1414 [Source:MGISymbol;Acc:MGI:3031248]
MGP_C57BL6NJ_G0016714	1098	0	0	0	0	0	0	0	0	0	0	0	0	1	97675508	97681488	-	1098	Olfr1415	GO:0004871;GO:0004930;GO:0004930;GO:0004984;GO:0004984;GO:0004984;GO:0005549;GO:0005886;GO:0007165;GO:0007186;GO:0007186;GO:0007186;GO:0007186;GO:0007608;GO:0007608;GO:0007608;GO:0016020;GO:0016021;GO:0016021;GO:0016021;GO:0050896;GO:0050911;	K04257	olfactory receptor 1415 [Source:MGISymbol;Acc:MGI:3031249]
MGP_C57BL6NJ_G0016715	1082	0	0	0	0	0	0	0	0	0	0	0	0	1	97752721	97753802	+	1082	Olfr1413	GO:0004871;GO:0004930;GO:0004930;GO:0004984;GO:0004984;GO:0004984;GO:0005549;GO:0005886;GO:0007165;GO:0007186;GO:0007186;GO:0007186;GO:0007186;GO:0007608;GO:0007608;GO:0007608;GO:0016020;GO:0016021;GO:0016021;GO:0016021;GO:0050896;GO:0050911;	K04257	olfactory receptor 1413 [Source:MGISymbol;Acc:MGI:3031247]
MGP_C57BL6NJ_G0016716	1091	0	0	0	0	0	0	0	0	0	0	0	0	1	97778469	97779559	+	1091	Olfr1412	GO:0004871;GO:0004930;GO:0004930;GO:0004984;GO:0004984;GO:0004984;GO:0005549;GO:0005886;GO:0007165;GO:0007186;GO:0007186;GO:0007186;GO:0007186;GO:0007608;GO:0007608;GO:0007608;GO:0016020;GO:0016021;GO:0016021;GO:0016021;GO:0050896;GO:0050911;	K04257	olfactory receptor 1412 [Source:MGISymbol;Acc:MGI:3031246]
MGP_C57BL6NJ_G0016717	998	0	0	0	0	0	0	0	0	0	0	0	0	1	97786860	97787857	+	998	Olfr1411	GO:0004871;GO:0004930;GO:0004930;GO:0004984;GO:0004984;GO:0004984;GO:0005549;GO:0005886;GO:0007165;GO:0007186;GO:0007186;GO:0007186;GO:0007186;GO:0007608;GO:0007608;GO:0007608;GO:0016020;GO:0016021;GO:0016021;GO:0016021;GO:0050896;GO:0050911;	K04257	olfactory receptor 1411 [Source:MGISymbol;Acc:MGI:3031245]
MGP_C57BL6NJ_G0016718	977	0	0	0	0	0	0	0	0	0	0	0	0	1	97798204	97799212	+	977	Olfr1410	GO:0004871;GO:0004930;GO:0004930;GO:0004984;GO:0004984;GO:0004984;GO:0005549;GO:0005886;GO:0007165;GO:0007186;GO:0007186;GO:0007186;GO:0007186;GO:0007608;GO:0007608;GO:0007608;GO:0016020;GO:0016021;GO:0016021;GO:0016021;GO:0050896;GO:0050911;	K04257	olfactory receptor 1410 [Source:MGISymbol;Acc:MGI:3031244]
MGP_C57BL6NJ_G0016719	1056	0	0	0	0	0	0	0	0	0	0	0	0	1	97810059	97811114	+	1056	Olfr12	GO:0004871;GO:0004930;GO:0004930;GO:0004984;GO:0004984;GO:0004984;GO:0005549;GO:0005886;GO:0007165;GO:0007186;GO:0007186;GO:0007186;GO:0007186;GO:0007608;GO:0007608;GO:0007608;GO:0016020;GO:0016021;GO:0016021;GO:0016021;GO:0050896;GO:0050911;	K04257	olfactory receptor 12 [Source:MGISymbol;Acc:MGI:107863]
MGP_C57BL6NJ_G0016720	1499	460	24.9396	439	19.0371	1451	44.5291	307	21.3881	289	20.3468	305	20.2264	1	97827201	97832041	-	1499	-	-	-	-
MGP_C57BL6NJ_G0016721	3082	0	0	0	0	7	0.104483	3	0.101654	0	0	0	0	1	97834274	97838897	-	3082	Otos	GO:0005576;GO:0007605;GO:0007605;GO:0007605;GO:0007605;	-	otospiralin [Source:MGI Symbol;Acc:MGI:2672814]"
MGP_C57BL6NJ_G0016722	5159	593	9.34163	1674	21.0925	15071	134.386	477	9.65582	530	10.842	547	10.5401	1	98031004	98060111	+	5159	Gpc1	GO:0005507;GO:0005507;GO:0005576;GO:0005576;GO:0005578;GO:0005578;GO:0005578;GO:0005615;GO:0005654;GO:0005768;GO:0005796;GO:0005829;GO:0005886;GO:0005886;GO:0009966;GO:0014037;GO:0014037;GO:0016020;GO:0016020;GO:0017134;GO:0017134;GO:0030200;GO:0030200;GO:0031012;GO:0031012;GO:0031012;GO:0031225;GO:0032288;GO:0032288;GO:0040037;GO:0040037;GO:0043025;GO:0043236;GO:0043236;GO:0043395;GO:0045121;GO:…	K08107	glypican 1 [Source:MGI Symbol;Acc:MGI:1194891]"
MGP_C57BL6NJ_G0016723	3455	11	0.258749	0	0	6	0.079888	8	0.241812	4	0.122184	7	0.201405	1	98060526	98104193	-	3455	Ankmy1	GO:0046872;	-	ankyrin repeat and MYND domain containing 1[Source:MGI Symbol;Acc:MGI:3045261]
MGP_C57BL6NJ_G0016724	1314	20	1.237	21	1.03887	109	3.81601	13	1.0332	16	1.28507	11	0.832182	1	98108170	98109624	+	1314	Dusp28	GO:0004721;GO:0004725;GO:0006470;GO:0008138;GO:0016311;GO:0016311;GO:0016311;GO:0016787;GO:0016791;GO:0016791;GO:0016791;GO:0035335;GO:0035335;	K14165	dual specificity phosphatase 28 [Source:MGISymbol;Acc:MGI:1914696]
MGP_C57BL6NJ_G0016725	9467	288	2.47237	720	4.94378	2794	13.5766	221	2.4379	166	1.85053	273	2.86663	1	98111972	98125578	+	9467	Rnpepl1	GO:0004177;GO:0005737;GO:0006508;GO:0006508;GO:0006508;GO:0006508;GO:0008233;GO:0008237;GO:0008237;GO:0008270;GO:0008270;GO:0016787;GO:0042277;GO:0043171;GO:0046872;GO:0070006;GO:0070006;GO:0070006;GO:0070006;	K09605	arginyl aminopeptidase (aminopeptidase B)-like 1[Source:MGI Symbol;Acc:MGI:1914170]
MGP_C57BL6NJ_G0016726	4346	10	0.187001	46	0.688029	285	3.01671	6	0.144178	21	0.509953	22	0.503215	1	98136855	98150364	+	4346	Capn10	GO:0000149;GO:0000422;GO:0004198;GO:0004198;GO:0004198;GO:0005622;GO:0005634;GO:0005737;GO:0005737;GO:0005739;GO:0005741;GO:0005743;GO:0005758;GO:0005759;GO:0005829;GO:0005856;GO:0005886;GO:0005938;GO:0006508;GO:0006508;GO:0006508;GO:0006508;GO:0007005;GO:0007568;GO:0008092;GO:0008233;GO:0008234;GO:0016787;GO:0031532;GO:0031532;GO:0031532;GO:0031667;GO:0032024;GO:0032388;GO:0032388;GO:0032869;GO:…	K08579	calpain 10 [Source:MGI Symbol;Acc:MGI:1344392]"
MGP_C57BL6NJ_G0016727	4839	48	0.806156	95	1.27616	3	0.0285196	92	1.98549	79	1.72295	134	2.75277	1	98153288	98184882	+	4839	Gpr35	GO:0004871;GO:0004930;GO:0004930;GO:0004930;GO:0004930;GO:0004950;GO:0005886;GO:0005886;GO:0005887;GO:0005887;GO:0005887;GO:0007010;GO:0007165;GO:0007186;GO:0007186;GO:0007186;GO:0007204;GO:0007204;GO:0016020;GO:0016021;GO:0016021;GO:0016494;GO:0016494;GO:0035025;GO:0038023;GO:0048246;GO:0051482;GO:0070098;GO:0070098;GO:1901386;GO:1904456;GO:0005886;GO:0005887;GO:0007010;	-	G protein-coupled receptor 35 [Source:MGISymbol;Acc:MGI:1929509]
MGP_C57BL6NJ_G0016728	1088	0	0	0	0	0	0	0	0	0	0	0	0	1	98206028	98213251	+	1088	Aqp12	GO:0005737;GO:0005737;GO:0005886;GO:0006810;GO:0006833;GO:0015250;GO:0015267;GO:0016020;GO:0016020;GO:0016021;GO:0055085;	K09871	aquaporin 12 [Source:MGI Symbol;Acc:MGI:2664636]"
MGP_C57BL6NJ_G0016729	9327	285	2.48334	378	2.63444	402	1.98272	141	1.57875	129	1.45965	68	0.724749	1	98216446	98309590	-	9327	Kif1a	GO:0000166;GO:0003774;GO:0003777;GO:0005524;GO:0005524;GO:0007018;GO:0008017;GO:1904115;	K10392	kinesin family member 1A [Source:MGISymbol;Acc:MGI:108391]
MGP_C57BL6NJ_G0016730	1697	0	0	0	0	0	0	0	0	0	0	0	0	1	98341942	98351936	+	1697	Agxt	GO:0003824;GO:0004760;GO:0004760;GO:0004760;GO:0005102;GO:0005739;GO:0005739;GO:0005739;GO:0005759;GO:0005759;GO:0005777;GO:0005777;GO:0005777;GO:0005777;GO:0005782;GO:0007219;GO:0007219;GO:0008453;GO:0008453;GO:0008453;GO:0008453;GO:0008483;GO:0008483;GO:0009436;GO:0016597;GO:0016740;GO:0019265;GO:0019265;GO:0019448;GO:0030170;GO:0042802;GO:0042803;GO:0042803;GO:0042853;GO:0042866;GO:0043231;GO:…	K00830	alanine-glyoxylate aminotransferase [Source:MGISymbol;Acc:MGI:1329033]
MGP_C57BL6NJ_G0016731	2368	0	0	0	0	0	0	0	0	0	0	0	0	1	98365498	98375097	-	2368	2310007B03Rik	GO:0003674;GO:0005575;GO:0008150;	-	RIKEN cDNA 2310007B03 gene [Source:MGISymbol;Acc:MGI:1919124]
MGP_C57BL6NJ_G0016732	7236	5	0.0561571	6	0.0539003	5	0.031787	0	0	0	0	0	0	1	98382789	98454309	+	7236	Crocc2	GO:0003674;GO:0005575;GO:0008150;	-	ciliary rootlet coiled-coil, rootletin familymember 2 [Source:MGI Symbol;Acc:MGI:3045962]
MGP_C57BL6NJ_G0016733	9491	1789	15.3191	2212	15.15	25	0.121173	179	1.9696	38	0.422544	67	0.701752	1	98459078	98531547	+	9491	Sned1	GO:0005509;GO:0007160;	-	sushi, nidogen and EGF-like domains 1 [Source:MGISymbol;Acc:MGI:3045960]
MGP_C57BL6NJ_G0016734	5271	113	1.74228	144	1.77586	170	1.48366	90	1.78314	95	1.90209	85	1.60305	1	98529693	98536397	-	5271	Mterf4	GO:0003690;GO:0003723;GO:0003727;GO:0005739;GO:0005739;GO:0005739;GO:0005762;GO:0005829;GO:0006355;GO:0006364;GO:0006390;GO:0006390;GO:0006626;GO:0007507;GO:0008380;GO:0019843;GO:0019843;GO:0032543;GO:0042255;GO:0043010;GO:0061668;GO:0005739;GO:0006390;GO:0006626;GO:0007507;GO:0042255;GO:0043010;	-	mitochondrial transcription termination factor 4[Source:MGI Symbol;Acc:MGI:1918355]
MGP_C57BL6NJ_G0016735	9060	31	0.278078	93	0.667258	21	0.106628	73	0.841455	76	0.885291	91	0.998468	1	98541112	98579980	-	9060	Pask	GO:0043576;GO:0070092;GO:0097009;GO:2000505;	K08801	PAS domain containing serine/threonine kinase[Source:MGI Symbol;Acc:MGI:2155936]
MGP_C57BL6NJ_G0016736	10495	458	3.54664	454	2.81198	440	1.92863	324	3.22403	318	3.19776	350	3.31518	1	98579352	98611579	+	10495	Ppp1r7	GO:0005515;GO:0005634;GO:0005634;GO:0005694;GO:0007059;GO:0007059;GO:0035307;GO:0070062;	K17550	protein phosphatase 1, regulatory (inhibitor)subunit 7 [Source:MGI Symbol;Acc:MGI:1913635]
MGP_C57BL6NJ_G0016737	3984	0	0	3	0.0489487	0	0	0	0	3	0.0794699	0	0	1	98612020	98643605	+	3984	Ano7	GO:0005229;GO:0005229;GO:0005622;GO:0005622;GO:0005634;GO:0005634;GO:0005783;GO:0005783;GO:0005886;GO:0005886;GO:0006810;GO:0006821;GO:0006821;GO:0006869;GO:0016020;GO:0016021;GO:0017128;GO:0017128;GO:0034220;GO:0046983;GO:0061588;GO:0061589;GO:0061589;GO:0061590;GO:0061590;GO:0061591;GO:0061591;GO:1902476;	K19501	anoctamin 7 [Source:MGI Symbol;Acc:MGI:3052714]"
MGP_C57BL6NJ_G0016738	11314	8654	62.1633	11132	63.9581	7884	32.056	3836	35.4078	3487	32.5264	3623	31.8327	1	98645242	98719734	-	11314	Hdlbp	GO:0003676;GO:0003723;GO:0003723;GO:0003723;GO:0005634;GO:0005737;GO:0005829;GO:0006629;GO:0006810;GO:0006869;GO:0008202;GO:0008203;GO:0034364;GO:0045296;	-	high density lipoprotein (HDL) binding protein[Source:MGI Symbol;Acc:MGI:99256]
MGP_C57BL6NJ_G0016739	6302	2454	31.6468	2780	28.6751	1403	10.2414	1725	28.5856	1875	31.3996	1637	25.8221	1	98719909	98752103	+	6302	Sept2	GO:0000145;GO:0000166;GO:0000281;GO:0000775;GO:0000776;GO:0000777;GO:0000910;GO:0000921;GO:0002036;GO:0003924;GO:0003924;GO:0005515;GO:0005525;GO:0005525;GO:0005634;GO:0005694;GO:0005730;GO:0005737;GO:0005737;GO:0005819;GO:0005826;GO:0005829;GO:0005856;GO:0005876;GO:0005886;GO:0005886;GO:0005929;GO:0005930;GO:0005938;GO:0005938;GO:0005940;GO:0007049;GO:0007049;GO:0007224;GO:0007283;GO:0009986;GO:…	-	septin 2 [Source:MGI Symbol;Acc:MGI:97298]"
MGP_C57BL6NJ_G0016740	5235	407	6.31846	579	7.18953	139	1.22145	210	4.18928	160	3.22555	136	2.58252	1	98756600	98877789	+	5235	Farp2	GO:0005085;GO:0005089;GO:0005089;GO:0005737;GO:0005829;GO:0005856;GO:0007155;GO:0007155;GO:0008092;GO:0016322;GO:0016601;GO:0022405;GO:0022405;GO:0030316;GO:0030316;GO:0030676;GO:0030676;GO:0030676;GO:0031532;GO:0031532;GO:0033623;GO:0033623;GO:0035023;GO:0065009;GO:0071526;GO:0071526;GO:0071800;GO:0071800;	K06082	FERM, RhoGEF and pleckstrin domain protein 2[Source:MGI Symbol;Acc:MGI:2385126]
MGP_C57BL6NJ_G0016741	5741	477	6.7525	846	9.57903	1551	12.428	311	5.6573	338	6.21341	294	5.09074	1	98875564	98917547	-	5741	Stk25	GO:0000139;GO:0000165;GO:0000166;GO:0000185;GO:0004672;GO:0004674;GO:0004674;GO:0005515;GO:0005524;GO:0005524;GO:0005737;GO:0005737;GO:0005737;GO:0005794;GO:0005794;GO:0006468;GO:0006468;GO:0006468;GO:0007163;GO:0007163;GO:0007346;GO:0008349;GO:0016301;GO:0016310;GO:0016740;GO:0023014;GO:0031098;GO:0032147;GO:0032874;GO:0036481;GO:0042542;GO:0042803;GO:0042981;GO:0046777;GO:0046872;GO:0050772;GO:…	K08838	serine/threonine kinase 25 (yeast) [Source:MGISymbol;Acc:MGI:1891699]
MGP_C57BL6NJ_G0016742	1840	0	0	19	0.671235	15	0.375018	0	0	0	0	0	0	1	98945134	98956397	+	1840	Bok	GO:0001836;GO:0005102;GO:0005102;GO:0005515;GO:0005634;GO:0005634;GO:0005640;GO:0005737;GO:0005737;GO:0005739;GO:0005739;GO:0005741;GO:0005741;GO:0005743;GO:0005743;GO:0005768;GO:0005783;GO:0005783;GO:0005789;GO:0005789;GO:0005789;GO:0005794;GO:0005794;GO:0006915;GO:0006915;GO:0006919;GO:0006919;GO:0006921;GO:0006921;GO:0008630;GO:0008635;GO:0008635;GO:0010506;GO:0016020;GO:0016020;GO:0016021;GO:…	K02561	BCL2-related ovarian killer [Source:MGISymbol;Acc:MGI:1858494]
MGP_C57BL6NJ_G0016743	6519	122	1.52094	222	2.21366	773	5.45477	74	1.18546	37	0.598993	90	1.37241	1	98962569	99020884	-	6519	Thap4	GO:0003674;GO:0003676;GO:0003677;GO:0005575;GO:0008150;GO:0020037;GO:0042803;GO:0046872;	-	THAP domain containing 4 [Source:MGISymbol;Acc:MGI:1914276]
MGP_C57BL6NJ_G0016744	8281	195	1.91375	422	3.3126	1223	6.79394	131	1.65206	247	3.14786	208	2.4969	1	99014875	99059421	+	8281	Atg4b	GO:0004197;GO:0005737;GO:0006508;GO:0006508;GO:0006810;GO:0006914;GO:0006914;GO:0008233;GO:0008234;GO:0015031;GO:0016787;	-	autophagy related 4B, cysteine peptidase[Source:MGI Symbol;Acc:MGI:1913865]
MGP_C57BL6NJ_G0016745	2597	98	3.06682	140	3.50425	143	2.53304	107	4.30277	89	3.61675	93	3.55985	1	99061410	99074761	-	2597	Dtymk	GO:0000166;GO:0004798;GO:0004798;GO:0004798;GO:0004798;GO:0004798;GO:0005524;GO:0005524;GO:0005634;GO:0005737;GO:0005739;GO:0005739;GO:0005758;GO:0005759;GO:0005829;GO:0006227;GO:0006233;GO:0006233;GO:0006233;GO:0006233;GO:0006235;GO:0006235;GO:0006235;GO:0009041;GO:0009165;GO:0009165;GO:0009165;GO:0016301;GO:0016310;GO:0016740;GO:0046939;GO:0046940;GO:0050145;GO:0071363;GO:0071363;	K00943	deoxythymidylate kinase [Source:MGISymbol;Acc:MGI:108396]
MGP_C57BL6NJ_G0016746	4543	405	7.24512	396	5.66619	482	4.8807	277	6.36757	295	6.85299	188	4.11373	1	99076810	99097188	+	4543	Ing5	GO:0003682;GO:0005634;GO:0005634;GO:0005634;GO:0006260;GO:0006260;GO:0006325;GO:0006351;GO:0006355;GO:0006473;GO:0008285;GO:0008285;GO:0016569;GO:0016573;GO:0035064;GO:0043065;GO:0043966;GO:0043966;GO:0045893;GO:0045893;GO:0045926;GO:0046872;GO:0070776;GO:0070776;GO:0070776;GO:2001235;GO:0003682;GO:0008285;GO:2001235;	-	inhibitor of growth family, member 5 [Source:MGISymbol;Acc:MGI:1922816]
MGP_C57BL6NJ_G0016747	4418	24	0.441488	57	0.838664	150	1.56187	24	0.567312	47	1.12272	20	0.450013	1	99099991	99238465	+	4418	D2hgdh	GO:0003824;GO:0004458;GO:0005739;GO:0005739;GO:0005739;GO:0005739;GO:0010042;GO:0010042;GO:0010043;GO:0010043;GO:0016491;GO:0016491;GO:0016614;GO:0019516;GO:0022904;GO:0031234;GO:0032025;GO:0032025;GO:0044267;GO:0044267;GO:0050660;GO:0051990;GO:0051990;GO:0051990;GO:0055114;GO:0055114;GO:0071949;GO:0071949;	-	D-2-hydroxyglutarate dehydrogenase [Source:MGISymbol;Acc:MGI:2138209]
MGP_C57BL6NJ_G0016749	2985	0	0	0	0	0	0	0	0	0	0	0	0	1	99154017	99328691	+	2985	Gm6086	-	K09675	predicted gene 6086 [Source:MGISymbol;Acc:MGI:3646771]
MGP_C57BL6NJ_G0016750	2705	0	0	0	0	0	0	0	0	0	0	0	0	1	99158438	99328697	+	2705	-	-	K09675	-
MGP_C57BL6NJ_G0016751	4637	0	0	0	0	0	0	0	0	0	0	0	0	1	99437155	99445037	+	4637	Neu4	GO:0004308;GO:0004308;GO:0004308;GO:0004308;GO:0004308;GO:0005737;GO:0005739;GO:0005739;GO:0005764;GO:0005975;GO:0006516;GO:0006516;GO:0006629;GO:0006689;GO:0006689;GO:0006689;GO:0008152;GO:0009313;GO:0009313;GO:0009313;GO:0016020;GO:0016020;GO:0016042;GO:0016787;GO:0016798;GO:0019866;GO:0019866;GO:0043231;GO:0052794;GO:0052795;GO:0052796;	K12357	sialidase 4 [Source:MGI Symbol;Acc:MGI:2661364]"
MGP_C57BL6NJ_G0016752	1933	0	0	0	0	0	0	0	0	0	0	14	0.719974	1	99454897	99469089	-	1933	Pdcd1	GO:0002376;GO:0002644;GO:0002644;GO:0005515;GO:0005515;GO:0005886;GO:0006915;GO:0009897;GO:0009897;GO:0016020;GO:0016021;GO:0043065;GO:0043065;GO:0043066;GO:0043066;GO:0070234;	K06744	programmed cell death 1 [Source:MGISymbol;Acc:MGI:104879]
MGP_C57BL6NJ_G0016753	4814	337	5.68928	328	4.42901	601	5.7431	329	7.13717	302	6.62067	388	8.0121	1	100827565	100850130	+	4814	Fam174a	GO:0003674;GO:0005575;GO:0008150;GO:0016020;GO:0016021;	-	family with sequence similarity 174, member A[Source:MGI Symbol;Acc:MGI:1914948]
MGP_C57BL6NJ_G0016754	20093	2086	8.43729	2484	8.03611	620	1.41947	1057	5.49372	1310	6.88062	1147	5.67466	1	101151585	101233881	-	20093	St8sia4	GO:0000139;GO:0001574;GO:0003828;GO:0003828;GO:0005794;GO:0006486;GO:0006486;GO:0006486;GO:0006491;GO:0008373;GO:0009311;GO:0016020;GO:0016021;GO:0016740;GO:0016757;GO:0097503;	K06614	ST8 alpha-N-acetyl-neuraminide alpha-2,8-sialyltransferase 4 [Source:MGI Symbol;Acc:MGI:106018]
MGP_C57BL6NJ_G0016755	4904	0	0	0	0	0	0	2	0.0425908	0	0	0	0	1	102465949	102524852	-	4904	Slco4c1	GO:0005215;GO:0005886;GO:0005887;GO:0006810;GO:0006811;GO:0007275;GO:0007283;GO:0008514;GO:0015347;GO:0015711;GO:0016020;GO:0016020;GO:0016021;GO:0016021;GO:0016323;GO:0016323;GO:0030154;GO:0043252;GO:0055085;GO:0070062;	K14355	solute carrier organic anion transporter family,member 4C1 [Source:MGI Symbol;Acc:MGI:2442784]
MGP_C57BL6NJ_G0016756	2842	0	0	0	0	0	0	0	0	0	0	0	0	1	102725745	102804811	-	2842	Slco6c1	GO:0005215;GO:0005887;GO:0005887;GO:0008514;GO:0015347;GO:0015711;GO:0016020;GO:0016020;GO:0016021;GO:0043252;GO:0055085;	-	solute carrier organic anion transporter family,member 6c1 [Source:MGI Symbol;Acc:MGI:1921691]
MGP_C57BL6NJ_G0016757	40926	1534	3.04621	1760	2.79545	1098	1.23419	956	2.43947	1558	4.01762	1116	2.71073	1	103313860	103372567	-	40926	D1Ertd622e	GO:0003674;GO:0005737;GO:0005737;GO:0005929;GO:0006810;GO:0010764;GO:0010764;GO:0015031;GO:0030030;GO:0035869;GO:0035869;GO:0042995;GO:0060271;GO:1900016;GO:1900016;	-	DNA segment, Chr 1, ERATO Doi 622, expressed[Source:MGI Symbol;Acc:MGI:1277184]
MGP_C57BL6NJ_G0016758	14386	1122	6.3385	1420	6.41634	391	1.2503	730	5.29931	892	6.54373	820	5.66624	1	103418510	103490269	-	14386	Ppip5k2	GO:0000828;GO:0033857;	K13024	diphosphoinositol pentakisphosphate kinase 2[Source:MGI Symbol;Acc:MGI:2142810]
MGP_C57BL6NJ_G0016759	6048	197	2.64721	203	2.18184	50	0.380309	118	2.03754	159	2.77451	87	1.42997	1	103490030	103517279	+	6048	Gin1	GO:0003676;GO:0015074;	-	gypsy retrotransposon integrase 1 [Source:MGISymbol;Acc:MGI:2182036]
MGP_C57BL6NJ_G0016760	11479	1318	9.33136	1620	9.17381	1239	4.9653	494	4.49427	404	3.71431	405	3.50729	1	103518684	103826862	-	11479	Pam	GO:0001519;GO:0001519;GO:0001676;GO:0003824;GO:0003824;GO:0004497;GO:0004497;GO:0004504;GO:0004504;GO:0004504;GO:0004598;GO:0004598;GO:0004598;GO:0005507;GO:0005507;GO:0005509;GO:0005576;GO:0005615;GO:0005802;GO:0005829;GO:0005886;GO:0005886;GO:0005887;GO:0006357;GO:0006518;GO:0006518;GO:0008152;GO:0008270;GO:0009268;GO:0009404;GO:0009986;GO:0016020;GO:0016020;GO:0016020;GO:0016021;GO:0016491;GO:…	-	peptidylglycine alpha-amidating monooxygenase[Source:MGI Symbol;Acc:MGI:97475]
MGP_C57BL6NJ_G0016761	3173	1	0.0256132	0	0	0	0	0	0	0	0	0	0	1	104169031	104269069	+	3173	Slco6d1	GO:0005215;GO:0005887;GO:0015347;GO:0016020;GO:0016020;GO:0016021;GO:0043252;GO:0055085;	-	solute carrier organic anion transporter family,member 6d1 [Source:MGI Symbol;Acc:MGI:1918116]
MGP_C57BL6NJ_G0016762	5205	0	0	0	0	0	0	1	0.0200639	0	0	0	0	1	105605779	106365445	+	5205	Cntnap5b	GO:0007155;GO:0016020;GO:0016021;	-	contactin associated protein-like 5B [Source:MGISymbol;Acc:MGI:3664583]
MGP_C57BL6NJ_G0016763	4012	0	0	0	0	0	0	0	0	0	0	0	0	1	111011494	111244471	+	4012	Cdh20	GO:0005509;GO:0005509;GO:0005886;GO:0005886;GO:0005886;GO:0005913;GO:0007043;GO:0007155;GO:0007155;GO:0007156;GO:0007156;GO:0008092;GO:0009986;GO:0016020;GO:0016020;GO:0016021;GO:0016339;GO:0016342;GO:0034332;GO:0042803;GO:0044331;GO:0045296;GO:0046872;GO:0098609;	K06807	cadherin 20 [Source:MGI Symbol;Acc:MGI:1346069]"
MGP_C57BL6NJ_G0016764	8529	0	0	0	0	0	0	2	0.0244888	0	0	4	0.0466211	1	111524636	111606792	-	8529	Rnf152	GO:0000209;GO:0004842;GO:0004842;GO:0005764;GO:0005764;GO:0005764;GO:0005765;GO:0005765;GO:0005765;GO:0006915;GO:0006915;GO:0010508;GO:0010508;GO:0010508;GO:0010508;GO:0010508;GO:0016020;GO:0016021;GO:0016567;GO:0016740;GO:0031267;GO:0031301;GO:0031301;GO:0034198;GO:0034198;GO:0034198;GO:0034198;GO:0046872;GO:0061630;GO:0061630;GO:0061630;GO:0070534;GO:0070534;GO:0070936;GO:0070936;GO:0070936;GO:…	K15705	ring finger protein 152 [Source:MGISymbol;Acc:MGI:2443787]
MGP_C57BL6NJ_G0016765	10660	705	5.37484	844	5.14664	494	2.13181	373	3.65416	505	4.9996	301	2.80692	1	111778541	111923745	-	10660	Pign	GO:0003824;GO:0005789;GO:0006506;GO:0008152;GO:0016020;GO:0016021;GO:0016021;GO:0016740;GO:0051377;	K05285	phosphatidylinositol glycan anchor biosynthesis,class N [Source:MGI Symbol;Acc:MGI:1351629]
MGP_C57BL6NJ_G0016766	9500	712	6.09102	882	6.03509	204	0.987836	550	6.0461	662	7.3542	439	4.59369	1	111923929	112022207	+	9500	2310035C23Rik	-	-	RIKEN cDNA 2310035C23 gene [Source:MGISymbol;Acc:MGI:1922832]
MGP_C57BL6NJ_G0016767	5987	2670	36.2439	2633	28.5878	2055	15.79	2204	38.4449	2304	40.6138	1788	29.6879	1	112048184	112121863	+	5987	Tnfrsf11a	GO:0001503;GO:0001503;GO:0002250;GO:0004888;GO:0005031;GO:0005031;GO:0005515;GO:0005829;GO:0005886;GO:0005886;GO:0005887;GO:0006955;GO:0007275;GO:0007275;GO:0009897;GO:0009986;GO:0009986;GO:0016020;GO:0016021;GO:0019955;GO:0030316;GO:0032496;GO:0032496;GO:0033209;GO:0033209;GO:0034097;GO:0034612;GO:0034612;GO:0042127;GO:0042981;GO:0043507;GO:0045780;GO:0045780;GO:0046872;GO:0048535;GO:0048535;GO:…	K05147	tumor necrosis factor receptor superfamily, member11a, NFKB activator [Source:MGI Symbol;Acc:MGI:1314891]
MGP_C57BL6NJ_G0016768	6774	1566	18.788	1863	17.8775	2738	18.5937	1643	25.3296	2084	32.4678	1489	21.851	1	112279137	112324254	+	6774	Zcchc2	GO:0003674;GO:0003676;GO:0005737;GO:0008150;GO:0008270;GO:0035091;GO:0046872;	K22700	zinc finger, CCHC domain containing 2 [Source:MGISymbol;Acc:MGI:2444114]
MGP_C57BL6NJ_G0016769	6752	956	11.5069	1137	10.9463	2714	18.4908	1212	18.7459	1406	21.9763	1190	17.5201	1	112461113	112688987	+	6752	Phlpp1	GO:0001917;GO:0001932;GO:0002667;GO:0002667;GO:0003824;GO:0004721;GO:0004722;GO:0004722;GO:0005634;GO:0005654;GO:0005737;GO:0005737;GO:0005737;GO:0005886;GO:0005886;GO:0006470;GO:0006470;GO:0006470;GO:0006915;GO:0007165;GO:0009649;GO:0009649;GO:0016020;GO:0016787;GO:0031965;GO:0031965;GO:0042622;GO:0042981;GO:0043408;GO:0046328;GO:0046328;GO:0046872;GO:0051896;GO:0051897;GO:0051898;GO:0070373;GO:…	K16340	PH domain and leucine rich repeat proteinphosphatase 1 [Source:MGI Symbol;Acc:MGI:2138327]
MGP_C57BL6NJ_G0016770	9129	273	2.43037	341	2.42812	299	1.5067	299	3.42046	298	3.44504	270	2.9401	1	112847969	113035252	-	9129	Bcl2	GO:0000209;GO:0000902;GO:0000902;GO:0001503;GO:0001503;GO:0001541;GO:0001541;GO:0001656;GO:0001656;GO:0001657;GO:0001657;GO:0001658;GO:0001658;GO:0001662;GO:0001662;GO:0001776;GO:0001776;GO:0001782;GO:0001782;GO:0001822;GO:0001822;GO:0001836;GO:0001836;GO:0001952;GO:0001952;GO:0002020;GO:0002260;GO:0002260;GO:0002320;GO:0002320;GO:0002326;GO:0002326;GO:0002360;GO:0002360;GO:0002520;GO:0002520;GO:…	K02161	B cell leukemia/lymphoma 2 [Source:MGISymbol;Acc:MGI:88138]
MGP_C57BL6NJ_G0016771	8133	199	1.98855	353	2.82139	414	2.34168	99	1.27122	108	1.40144	108	1.32006	1	113041437	113081152	-	8133	Kdsr	GO:0005783;GO:0005783;GO:0005783;GO:0005789;GO:0005789;GO:0006629;GO:0006665;GO:0006666;GO:0006666;GO:0016020;GO:0016020;GO:0016021;GO:0016491;GO:0016491;GO:0030148;GO:0030148;GO:0030148;GO:0047560;GO:0047560;GO:0047560;GO:0055114;GO:0055114;	K04708	3-ketodihydrosphingosine reductase [Source:MGISymbol;Acc:MGI:1918000]
MGP_C57BL6NJ_G0016772	8905	2548	23.2541	3266	23.8408	2692	13.9065	1997	23.4197	1934	22.9205	2130	23.7775	1	113085496	113119546	-	8905	Vps4b	GO:0000166;GO:0000920;GO:0000922;GO:0005515;GO:0005515;GO:0005524;GO:0005524;GO:0005634;GO:0005634;GO:0005737;GO:0005768;GO:0005768;GO:0005813;GO:0005829;GO:0006810;GO:0006813;GO:0006997;GO:0007032;GO:0007049;GO:0007080;GO:0008022;GO:0010008;GO:0010824;GO:0010971;GO:0015031;GO:0016020;GO:0016197;GO:0016787;GO:0016887;GO:0016887;GO:0019076;GO:0030301;GO:0031902;GO:0032510;GO:0033993;GO:0036258;GO:…	K12196	vacuolar protein sorting 4B [Source:MGISymbol;Acc:MGI:1100499]
MGP_C57BL6NJ_G0016773	2750	0	0	0	0	0	0	0	0	0	0	0	0	1	113183792	113214375	+	2750	Serpinb5	GO:0002009;GO:0004867;GO:0004867;GO:0005576;GO:0005615;GO:0005615;GO:0005615;GO:0005737;GO:0010951;GO:0010951;GO:0030198;GO:0050678;GO:0060512;GO:0070062;GO:0002009;GO:0005737;GO:0030198;GO:0050678;GO:0060512;	K10139	serine (or cysteine) peptidase inhibitor, clade B,member 5 [Source:MGI Symbol;Acc:MGI:109579]
MGP_C57BL6NJ_G0016774	2498	31	1.00856	49	1.27509	197	3.62787	15	0.627098	17	0.71822	10	0.39795	1	113272789	113295401	+	2498	Serpinb12	GO:0002244;GO:0002244;GO:0004867;GO:0004867;GO:0004867;GO:0005615;GO:0005615;GO:0005737;GO:0010466;GO:0010951;GO:0010951;GO:0030414;GO:0070062;	K13966	serine (or cysteine) peptidase inhibitor, clade B(ovalbumin), member 12 [Source:MGISymbol;Acc:MGI:1919119]
MGP_C57BL6NJ_G0016775	1672	0	0	0	0	0	0	0	0	0	0	0	0	1	113318204	113341108	+	1672	Serpinb13	GO:0002020;GO:0004867;GO:0004867;GO:0004869;GO:0005615;GO:0005615;GO:0005654;GO:0005737;GO:0005737;GO:0005829;GO:0010466;GO:0010951;GO:0010951;GO:0016020;GO:0016021;GO:0016607;GO:0030414;GO:0070062;GO:1902173;	K13963	serine (or cysteine) peptidase inhibitor, clade B(ovalbumin), member 13 [Source:MGISymbol;Acc:MGI:3042250]
MGP_C57BL6NJ_G0016776	1631	0	0	0	0	0	0	0	0	0	0	0	0	1	113395182	113409680	-	1631	Serpinb3a	GO:0002020;GO:0004867;GO:0004867;GO:0005615;GO:0005615;GO:0005622;GO:0010466;GO:0010951;GO:0010951;GO:0019899;GO:0042270;GO:0070062;	K13963	serine (or cysteine) peptidase inhibitor, clade B(ovalbumin), member 3A [Source:MGISymbol;Acc:MGI:3573933]
MGP_C57BL6NJ_G0016777	1688	0	0	0	0	0	0	0	0	0	0	0	0	1	113522258	113668431	-	1688	Serpinb3b	GO:0004867;GO:0004867;GO:0004867;GO:0004869;GO:0004869;GO:0005615;GO:0005615;GO:0010951;GO:0010951;	K13963	serine (or cysteine) peptidase inhibitor, clade B(ovalbumin), member 3B [Source:MGISymbol;Acc:MGI:2683293]
MGP_C57BL6NJ_G0016778	1612	0	0	0	0	0	0	0	0	0	0	0	0	1	113659995	113668441	-	1612	-	-	-	-
MGP_C57BL6NJ_G0016779	2186	0	0	0	0	0	0	0	0	0	0	0	0	1	113762335	113781612	+	2186	Serpinb11	GO:0004867;GO:0004867;GO:0005615;GO:0005615;GO:0005737;GO:0010466;GO:0010951;GO:0010951;GO:0030414;	-	serine (or cysteine) peptidase inhibitor, clade B(ovalbumin), member 11 [Source:MGISymbol;Acc:MGI:1914207]
MGP_C57BL6NJ_G0016780	1957	0	0	0	0	5	0.117532	0	0	0	0	0	0	1	113794999	113857795	+	1957	Serpinb7	GO:0004867;GO:0004867;GO:0005615;GO:0005615;GO:0005737;GO:0010466;GO:0010951;GO:0010951;GO:0030162;GO:0030414;GO:0032914;GO:0032967;GO:0072126;GO:0090362;	-	serine (or cysteine) peptidase inhibitor, clade B,member 7 [Source:MGI Symbol;Acc:MGI:2151053]
MGP_C57BL6NJ_G0016781	2349	581	20.1014	1042	28.8352	37	0.724598	73	3.24546	9	0.404353	51	2.15828	1	113919993	113946234	+	2349	Serpinb2	GO:0004867;GO:0004867;GO:0004867;GO:0005576;GO:0005615;GO:0005615;GO:0005615;GO:0005737;GO:0010466;GO:0010951;GO:0010951;GO:0030414;GO:0042060;GO:0043066;	K19821	serine (or cysteine) peptidase inhibitor, clade B,member 2 [Source:MGI Symbol;Acc:MGI:97609]
MGP_C57BL6NJ_G0016782	963	0	0	0	0	0	0	0	0	0	0	0	0	1	113946264	113960129	+	963	Serpinb10	GO:0005615;	K13963	serine (or cysteine) peptidase inhibitor, clade B(ovalbumin), member 10 [Source:MGISymbol;Acc:MGI:2138648]
MGP_C57BL6NJ_G0016783	4775	886	15.0797	1079	14.6888	890	8.57422	486	10.6292	529	11.6918	462	9.6181	1	114009305	114029818	+	4775	Serpinb8	GO:0004867;GO:0004867;GO:0004867;GO:0004867;GO:0005615;GO:0005615;GO:0005737;GO:0005737;GO:0005829;GO:0010466;GO:0010951;GO:0010951;GO:0030414;GO:0070062;GO:0090136;	K13965	serine (or cysteine) peptidase inhibitor, clade B,member 8 [Source:MGI Symbol;Acc:MGI:894657]
MGP_C57BL6NJ_G0016784	10034	0	0	0	0	0	0	0	0	0	0	0	0	1	116558800	116750280	+	10034	Cdh7	GO:0005509;GO:0005509;GO:0005886;GO:0005886;GO:0005886;GO:0005913;GO:0007043;GO:0007155;GO:0007155;GO:0007156;GO:0007156;GO:0008092;GO:0009986;GO:0016020;GO:0016020;GO:0016021;GO:0016339;GO:0016342;GO:0034332;GO:0042803;GO:0044331;GO:0045296;GO:0046872;GO:0098609;	-	cadherin 7, type 2 [Source:MGISymbol;Acc:MGI:2442792]
MGP_C57BL6NJ_G0016785	4280	6	0.113931	20	0.303756	0	0	8	0.195201	0	0	0	0	1	117533887	117636479	-	4280	Cdh19	GO:0003674;GO:0005509;GO:0005509;GO:0005575;GO:0005886;GO:0005886;GO:0005886;GO:0005913;GO:0007043;GO:0007155;GO:0007155;GO:0007156;GO:0007156;GO:0008092;GO:0008150;GO:0009986;GO:0016020;GO:0016020;GO:0016021;GO:0016339;GO:0016342;GO:0034332;GO:0042803;GO:0044331;GO:0045296;GO:0098609;	K06806	cadherin 19, type 2 [Source:MGISymbol;Acc:MGI:3588198]
MGP_C57BL6NJ_G0016786	5763	252	3.55374	310	3.49665	83	0.662533	99	1.794	126	2.3074	120	2.06992	1	118610501	118616717	-	5763	Dsel	GO:0030204;GO:0030205;GO:0047757;	-	dermatan sulfate epimerase-like [Source:MGISymbol;Acc:MGI:2442948]
MGP_C57BL6NJ_G0016787	10956	0	0	0	0	0	0	0	0	0	0	0	0	1	122705128	123670455	+	10956	Cntnap5a	GO:0004190;GO:0006508;GO:0007155;GO:0016020;GO:0016021;	-	contactin associated protein-like 5A [Source:MGISymbol;Acc:MGI:3643623]
MGP_C57BL6NJ_G0016788	3030	0	0	0	0	0	0	0	0	0	0	0	0	1	123906271	123929426	+	3030	Gm19965	GO:0003676;GO:0005622;GO:0006355;GO:0046872;	-	predicted gene, 19965 [Source:MGISymbol;Acc:MGI:5012150]
MGP_C57BL6NJ_G0016789	1963	0	0	0	0	0	0	0	0	0	0	0	0	1	124876422	125492388	+	1963	-	-	-	-
MGP_C57BL6NJ_G0016790	981	0	0	0	0	0	0	0	0	0	0	0	0	1	124876422	125130567	+	981	Gm28363	GO:0003676;GO:0005622;GO:0005634;GO:0006355;GO:0046872;	-	predicted gene 28363 [Source:MGISymbol;Acc:MGI:5579069]
MGP_C57BL6NJ_G0016791	2242	0	0	0	0	0	0	0	0	0	0	0	0	1	124894065	124946262	+	2242	-	-	-	-
MGP_C57BL6NJ_G0016792	2391	0	0	0	0	0	0	0	0	0	0	0	0	1	125463348	125492273	+	2391	-	-	-	-
MGP_C57BL6NJ_G0016793	9036	785	7.06036	943	6.78382	1241	6.31791	436	5.03903	379	4.42653	455	5.0056	1	125589541	125612035	-	9036	Tsn	GO:0003677;GO:0003697;GO:0003697;GO:0003697;GO:0003723;GO:0003723;GO:0003723;GO:0003723;GO:0003729;GO:0003729;GO:0004518;GO:0004519;GO:0004521;GO:0005515;GO:0005634;GO:0005634;GO:0005634;GO:0005634;GO:0005737;GO:0005737;GO:0005737;GO:0005737;GO:0016070;GO:0016787;GO:0042802;GO:0043565;GO:0043565;GO:0043565;GO:0044877;GO:0090305;GO:0090502;	-	translin [Source:MGI Symbol;Acc:MGI:109263]"
MGP_C57BL6NJ_G0016794	1965	1127	46.6117	1394	46.1147	485	11.3542	627	33.3228	504	27.0688	542	27.4194	1	125622028	125633940	+	1965	Nifk	GO:0000794;GO:0003676;GO:0003723;GO:0003723;GO:0005634;GO:0005654;GO:0005694;GO:0005730;GO:0005730;GO:0005737;GO:0010923;GO:0010923;	K14838	nucleolar protein interacting with the FHA domainof MKI67 [Source:MGI Symbol;Acc:MGI:1915199]
MGP_C57BL6NJ_G0016795	21569	2339	8.8132	2840	8.55908	1074	2.29062	1203	5.82468	1331	6.51252	994	4.58118	1	125700962	125959988	+	21569	Clasp1	GO:0005828;GO:0005881;GO:0043515;GO:0051010;	K16578	CLIP associating protein 1 [Source:MGISymbol;Acc:MGI:1923957]
MGP_C57BL6NJ_G0016796	9438	0	0	5	0.0344373	12	0.0584897	0	0	0	0	0	0	1	125981488	126040966	+	9438	Tfcp2l1	GO:0000122;GO:0000902;GO:0000977;GO:0002070;GO:0005634;GO:0005737;GO:0007028;GO:0007431;GO:0008340;GO:0016020;GO:0045927;	K09275	transcription factor CP2-like 1 [Source:MGISymbol;Acc:MGI:2444691]
MGP_C57BL6NJ_G0016797	6869	15	0.177473	25	0.236584	0	0	0	0	0	0	0	0	1	126210418	126437378	-	6869	Gli2	GO:0000122;GO:0000122;GO:0000978;GO:0000978;GO:0001077;GO:0001077;GO:0001501;GO:0001501;GO:0001649;GO:0001649;GO:0001701;GO:0001701;GO:0001822;GO:0001822;GO:0002009;GO:0002009;GO:0002062;GO:0002062;GO:0002076;GO:0002076;GO:0003676;GO:0003677;GO:0003677;GO:0003677;GO:0003682;GO:0003682;GO:0003700;GO:0003700;GO:0005515;GO:0005515;GO:0005515;GO:0005634;GO:0005634;GO:0005634;GO:0005654;GO:0005730;GO:…	K16798	GLI-Kruppel family member GLI2 [Source:MGISymbol;Acc:MGI:95728]
MGP_C57BL6NJ_G0016798	4255	165	3.1515	271	4.14008	7	0.0756792	19	0.466327	2	0.0496057	5	0.116813	1	126840438	126848831	-	4255	Inhbb	GO:0001654;GO:0005125;GO:0005160;GO:0005179;GO:0005179;GO:0005576;GO:0005576;GO:0005576;GO:0005615;GO:0005615;GO:0005615;GO:0005615;GO:0008083;GO:0008083;GO:0009267;GO:0009267;GO:0009611;GO:0009612;GO:0009612;GO:0010469;GO:0010862;GO:0032869;GO:0032869;GO:0032924;GO:0032924;GO:0034711;GO:0042803;GO:0042803;GO:0042981;GO:0043408;GO:0043513;GO:0044320;GO:0044320;GO:0045444;GO:0045444;GO:0046676;GO:…	K22687	inhibin beta-B [Source:MGI Symbol;Acc:MGI:96571]"
MGP_C57BL6NJ_G0016799	4930	1232	20.3094	2047	26.9904	1299	12.1211	787	16.6711	714	15.2845	744	15.0019	1	126909427	126943845	-	4930	Ralb	GO:0000145;GO:0000166;GO:0001928;GO:0001928;GO:0001934;GO:0003924;GO:0003924;GO:0003924;GO:0005525;GO:0005525;GO:0005525;GO:0005622;GO:0005776;GO:0005886;GO:0005886;GO:0005886;GO:0006915;GO:0007049;GO:0007165;GO:0007265;GO:0009267;GO:0016020;GO:0016020;GO:0019003;GO:0030496;GO:0030496;GO:0031625;GO:0032091;GO:0032092;GO:0051117;GO:0051301;GO:0060178;GO:0060178;GO:0070062;GO:0071360;GO:0071902;GO:…	K07835	v-ral simian leukemia viral oncogene B [Source:MGISymbol;Acc:MGI:1927244]
MGP_C57BL6NJ_G0016800	2824	7	0.20145	14	0.322257	4	0.0651589	8	0.295843	0	0	1	0.0352011	1	126965559	126968382	+	2824	Tmem185b	GO:0003674;GO:0005575;GO:0008150;GO:0016020;GO:0016021;	-	transmembrane protein 185B [Source:MGISymbol;Acc:MGI:1917634]
MGP_C57BL6NJ_G0016801	14688	53	0.293256	43	0.190303	17	0.0532432	7	0.0497705	0	0	14	0.0947515	1	126986440	127091350	-	14688	Epb41l5	GO:0000904;GO:0001701;GO:0001756;GO:0001837;GO:0001839;GO:0001954;GO:0003382;GO:0003383;GO:0005200;GO:0005515;GO:0005634;GO:0005737;GO:0005829;GO:0005856;GO:0005856;GO:0005886;GO:0005912;GO:0005912;GO:0005925;GO:0006931;GO:0007398;GO:0007492;GO:0007498;GO:0007509;GO:0008092;GO:0009826;GO:0010608;GO:0010634;GO:0010718;GO:0019904;GO:0022408;GO:0030036;GO:0030054;GO:0031032;GO:0031032;GO:0031252;GO:…	-	erythrocyte membrane protein band 4.1 like 5[Source:MGI Symbol;Acc:MGI:103006]
MGP_C57BL6NJ_G0016802	11343	393	2.81578	639	3.66194	105	0.425833	364	3.35127	374	3.47972	283	2.48016	1	127094817	127282003	-	11343	Ptpn4	GO:0004721;GO:0004725;GO:0004725;GO:0004726;GO:0004726;GO:0005515;GO:0005737;GO:0005737;GO:0005856;GO:0005856;GO:0005886;GO:0006470;GO:0008092;GO:0009898;GO:0016020;GO:0016311;GO:0016787;GO:0016791;GO:0035335;	K18037	protein tyrosine phosphatase, non-receptor type 4[Source:MGI Symbol;Acc:MGI:1099792]
MGP_C57BL6NJ_G0016803	3341	107	2.6028	89	1.73162	329	4.52999	63	1.96925	51	1.611	106	3.15392	1	127357265	127362583	-	3341	Tmem177	GO:0003674;GO:0005575;GO:0005739;GO:0005743;GO:0008150;GO:0016020;GO:0016021;GO:0031305;GO:0031305;	-	transmembrane protein 177 [Source:MGISymbol;Acc:MGI:1913593]
MGP_C57BL6NJ_G0016804	2915	0	0	0	0	0	0	0	0	1	0.0362045	0	0	1	127372666	127449936	-	2915	Cfap221	GO:0003341;GO:0003341;GO:0003341;GO:0005516;GO:0005516;GO:0005737;GO:0005856;GO:0005929;GO:0005929;GO:0005929;GO:0005929;GO:0005930;GO:0030030;GO:0042995;GO:0044458;GO:0044458;GO:0060271;	-	cilia and flagella associated protein 221[Source:MGI Symbol;Acc:MGI:2684947]
MGP_C57BL6NJ_G0016805	2012	0	0	0	0	0	0	0	0	0	0	0	0	1	127461579	127524408	+	2012	Sctr	GO:0004871;GO:0004888;GO:0004930;GO:0004930;GO:0005881;GO:0005881;GO:0005886;GO:0007165;GO:0007166;GO:0007186;GO:0007186;GO:0007186;GO:0007420;GO:0008528;GO:0015055;GO:0015055;GO:0016020;GO:0016020;GO:0016021;GO:0016021;GO:0017046;GO:0017046;GO:0042277;GO:0043950;	K04588	secretin receptor [Source:MGISymbol;Acc:MGI:2441720]
MGP_C57BL6NJ_G0016806	1311	14	0.867878	164	8.13167	224	7.86002	5	0.398294	6	0.483002	6	0.454956	1	127528249	127537359	-	1311	Tmem37	GO:0005244;GO:0005244;GO:0005262;GO:0005262;GO:0006810;GO:0006811;GO:0006816;GO:0016020;GO:0016021;GO:0016021;GO:0034765;GO:0070588;	-	transmembrane protein 37 [Source:MGISymbol;Acc:MGI:2157899]
MGP_C57BL6NJ_G0016807	1277	1076	68.4786	1033	52.5833	2278	82.0618	589	48.1682	450	37.1897	644	50.1321	1	127579347	127587085	-	1277	Dbi	GO:0000062;GO:0000062;GO:0001662;GO:0001942;GO:0005615;GO:0005634;GO:0005737;GO:0005739;GO:0005783;GO:0005794;GO:0005794;GO:0005886;GO:0006641;GO:0006810;GO:0007611;GO:0008021;GO:0008289;GO:0014009;GO:0021670;GO:0030156;GO:0031999;GO:0032228;GO:0036042;GO:0036151;GO:0043292;GO:0043588;GO:0046889;GO:0046983;GO:0051281;GO:0060291;GO:0070062;GO:0097038;	K08762	diazepam binding inhibitor [Source:MGISymbol;Acc:MGI:94865]
MGP_C57BL6NJ_G0016808	2423	7	0.234789	40	1.07311	32	0.60754	14	0.603408	24	1.04534	27	1.10772	1	127587225	127657361	+	2423	3110009E18Rik	GO:0003674;GO:0005575;GO:0008150;	-	RIKEN cDNA 3110009E18 gene [Source:MGISymbol;Acc:MGI:1920353]
MGP_C57BL6NJ_G0016809	5417	355	5.32602	1120	13.44	1498	12.7213	304	5.86072	209	4.07182	220	4.03724	1	127659928	127742057	-	5417	Steap3	GO:0016020;GO:0016021;	-	STEAP family member 3 [Source:MGISymbol;Acc:MGI:1915678]
MGP_C57BL6NJ_G0016810	1999	0	0	7	0.227627	0	0	0	0	0	0	0	0	1	127814160	127816751	+	1999	C1ql2	GO:0005515;GO:0005515;GO:0005576;GO:0005576;GO:0005576;GO:0005581;GO:0042802;GO:0042802;GO:0051259;GO:0051259;	-	complement component 1, q subcomponent-like 2[Source:MGI Symbol;Acc:MGI:3032521]
MGP_C57BL6NJ_G0016811	1925	2954	124.713	5254	177.418	8805	210.415	2400	130.202	2556	140.13	1979	102.196	1	127954081	127984413	-	1925	Marco	GO:0001540;GO:0001664;GO:0001664;GO:0001934;GO:0002376;GO:0005044;GO:0005581;GO:0005622;GO:0005622;GO:0005886;GO:0005886;GO:0005886;GO:0005886;GO:0006897;GO:0006897;GO:0006897;GO:0006898;GO:0007193;GO:0016020;GO:0016020;GO:0016021;GO:0043277;GO:0043277;GO:0045087;GO:0070374;GO:0097242;	K13884	macrophage receptor with collagenous structure[Source:MGI Symbol;Acc:MGI:1309998]
MGP_C57BL6NJ_G0016812	2627	12	0.37124	9	0.222701	0	0	0	0	0	0	0	0	1	128090098	128095657	+	2627	En1	GO:0000122;GO:0000978;GO:0001078;GO:0003677;GO:0003677;GO:0005515;GO:0005634;GO:0005634;GO:0005634;GO:0006355;GO:0007275;GO:0007275;GO:0008344;GO:0008344;GO:0009953;GO:0009953;GO:0009954;GO:0009954;GO:0010468;GO:0010468;GO:0016020;GO:0021549;GO:0021549;GO:0030182;GO:0030182;GO:0030326;GO:0030326;GO:0030326;GO:0030901;GO:0030901;GO:0030901;GO:0030902;GO:0030902;GO:0030917;GO:0030917;GO:0035115;GO:…	K09319	engrailed 1 [Source:MGI Symbol;Acc:MGI:95389]"
MGP_C57BL6NJ_G0016813	3164	145	3.72447	335	6.88251	516	7.50225	125	4.12582	143	4.7698	119	3.73879	1	128863017	128893174	-	3164	Insig2	GO:0005783;GO:0005783;GO:0005789;GO:0006629;GO:0006641;GO:0006641;GO:0006695;GO:0006695;GO:0006991;GO:0006991;GO:0008134;GO:0008202;GO:0008203;GO:0008203;GO:0008203;GO:0010894;GO:0010894;GO:0016020;GO:0016021;GO:0016126;GO:0016126;GO:0032933;GO:0032937;GO:0042472;GO:0042472;GO:0042474;GO:0042474;GO:0045717;GO:0045717;GO:0060021;GO:0060021;GO:0060363;GO:0060363;	-	insulin induced gene 2 [Source:MGISymbol;Acc:MGI:1920249]
MGP_C57BL6NJ_G0016814	11441	1584	11.2519	1884	10.7042	1998	8.03359	1220	11.1361	1545	14.2517	1171	10.1745	1	128996553	129075394	+	11441	Ccdc93	GO:0003674;GO:0005768;GO:0005769;GO:0006810;GO:0006893;GO:0006893;GO:0015031;GO:0043231;	-	coiled-coil domain containing 93 [Source:MGISymbol;Acc:MGI:1918079]
MGP_C57BL6NJ_G0016815	1935	0	0	0	0	0	0	0	0	0	0	0	0	1	129079391	129112034	-	1935	Htr5b	GO:0004871;GO:0004930;GO:0004930;GO:0004993;GO:0005886;GO:0005887;GO:0007165;GO:0007186;GO:0007186;GO:0016020;GO:0016021;GO:0016021;GO:0098664;	K04161	5-hydroxytryptamine (serotonin) receptor 5B[Source:MGI Symbol;Acc:MGI:96284]
MGP_C57BL6NJ_G0016816	2404	672	22.7179	899	24.3088	422	8.07525	444	19.2879	439	19.2722	417	17.2434	1	129139040	129156846	-	2404	Ddx18	GO:0000166;GO:0003676;GO:0003723;GO:0003723;GO:0004004;GO:0004386;GO:0005524;GO:0005524;GO:0005634;GO:0005694;GO:0005694;GO:0005730;GO:0005730;GO:0005730;GO:0005737;GO:0010501;GO:0016020;GO:0016787;	K13179	DEAD (Asp-Glu-Ala-Asp) box polypeptide 18[Source:MGI Symbol;Acc:MGI:1914192]
MGP_C57BL6NJ_G0016817	15364	4	0.0211587	1	0.00423092	0	0	0	0	15	0.103036	3	0.0194106	1	131066973	131856097	-	15364	Dpp10	GO:0006508;GO:0008236;GO:0016020;GO:0016021;	K23014	dipeptidylpeptidase 10 [Source:MGISymbol;Acc:MGI:2442409]
MGP_C57BL6NJ_G0016818	3475	8820	206.275	8629	161.415	8707	115.264	7914	237.836	7530	228.687	8003	228.939	1	133335417	133380337	-	3475	-	-	K18584	-
MGP_C57BL6NJ_G0016819	2956	452	12.427	653	14.3598	1168	18.1768	318	11.2346	452	16.1374	477	16.0411	1	133516329	133553381	+	2956	Slc35f5	GO:0003674;GO:0005575;GO:0006810;GO:0006810;GO:0016020;GO:0016020;GO:0016021;GO:0016021;	-	solute carrier family 35, member F5 [Source:MGISymbol;Acc:MGI:1921400]
MGP_C57BL6NJ_G0016820	3015	23	0.619975	40	0.862405	3	0.0457733	4	0.138551	0	0	0	0	1	133645244	133858373	+	3015	Gpr39	GO:0004871;GO:0004930;GO:0004930;GO:0007165;GO:0007186;GO:0007186;GO:0016020;GO:0016021;GO:0016021;	K08412	G protein-coupled receptor 39 [Source:MGISymbol;Acc:MGI:1918361]
MGP_C57BL6NJ_G0016821	7041	0	0	10	0.0923218	0	0	0	0	0	0	0	0	1	133852130	133897568	-	7041	Lypd1	GO:0001662;GO:0001662;GO:0001775;GO:0005515;GO:0005576;GO:0005886;GO:0007271;GO:0007271;GO:0016020;GO:0016020;GO:0016020;GO:0030550;GO:0030550;GO:0031225;GO:0033130;GO:0033130;GO:0035094;GO:0035094;GO:0095500;GO:0095500;GO:1903077;GO:1903077;GO:2000272;	-	Ly6/Plaur domain containing 1 [Source:MGISymbol;Acc:MGI:1919835]
MGP_C57BL6NJ_G0016822	11898	0	0	15	0.0819513	1	0.00386638	0	0	0	0	2	0.01671	1	133898104	134893293	-	11898	Nckap5	GO:0001578;GO:0003674;GO:0005575;GO:0007019;GO:0008150;GO:0035371;	-	NCK-associated protein 5 [Source:MGISymbol;Acc:MGI:2686394]
MGP_C57BL6NJ_G0016823	10280	3391	26.8082	4319	27.3105	3751	16.7854	2268	23.0402	2270	23.3042	2661	25.7319	1	135309684	135612049	+	10280	Mgat5	GO:0005794;GO:0006487;GO:0008375;GO:0016757;GO:0030144;	K00744	mannoside acetylglucosaminyltransferase 5[Source:MGI Symbol;Acc:MGI:894701]
MGP_C57BL6NJ_G0016824	4290	0	0	0	0	29	0.31097	0	0	0	0	0	0	1	135610259	135817965	-	4290	Tmem163	GO:0005515;GO:0005768;GO:0005886;GO:0008150;GO:0008270;GO:0008270;GO:0016020;GO:0016021;GO:0030054;GO:0030285;GO:0030285;GO:0030672;GO:0031410;GO:0031901;GO:0031901;GO:0045202;GO:0097708;GO:0099180;GO:0030285;	-	transmembrane protein 163 [Source:MGISymbol;Acc:MGI:1919410]
MGP_C57BL6NJ_G0016825	2831	0	0	0	0	0	0	0	0	0	0	0	0	1	135876184	135913981	+	2831	Acmsd	GO:0001760;GO:0001760;GO:0001760;GO:0005829;GO:0005829;GO:0005829;GO:0008270;GO:0016787;GO:0016829;GO:0016831;GO:0016831;GO:0016831;GO:0046872;GO:0046874;GO:0051259;GO:0070062;GO:1904985;GO:1904985;	K03392	amino carboxymuconate semialdehyde decarboxylase[Source:MGI Symbol;Acc:MGI:2386323]
MGP_C57BL6NJ_G0016826	12346	1156	7.60966	1150	6.05495	505	1.88167	1073	9.07632	1435	12.2667	1000	8.05183	1	135920130	135955814	+	12346	Ccnt2	GO:0003682;GO:0007519;GO:0048471;	K15188	cyclin T2 [Source:MGI Symbol;Acc:MGI:1920199]"
MGP_C57BL6NJ_G0016827	4669	0	0	3	0.0417673	0	0	0	0	0	0	0	0	1	135963019	136002916	-	4669	Map3k19	GO:0000166;GO:0004672;GO:0004674;GO:0004674;GO:0005524;GO:0005524;GO:0005622;GO:0005737;GO:0006468;GO:0007346;GO:0016301;GO:0016310;GO:0016740;GO:0023014;GO:0031098;GO:0032147;GO:0042981;	-	mitogen-activated protein kinase kinase kinase 19[Source:MGI Symbol;Acc:MGI:1203481]
MGP_C57BL6NJ_G0016828	10010	670	5.43969	867	5.6302	1348	6.1949	398	4.15227	467	4.92361	471	4.67743	1	136020347	136093399	+	10010	Rab3gap1	GO:0005096;GO:0005096;GO:0005096;GO:0005096;GO:0005737;GO:0005737;GO:0005737;GO:0005794;GO:0005811;GO:0007420;GO:0010628;GO:0010807;GO:0017112;GO:0017137;GO:0017137;GO:0021854;GO:0032483;GO:0032991;GO:0032991;GO:0034389;GO:0043010;GO:0043087;GO:0043234;GO:0043234;GO:0043547;GO:0043547;GO:0043547;GO:0045202;GO:0048172;GO:0048489;GO:0050821;GO:0060079;GO:0060325;GO:0061646;GO:0070062;GO:0071782;GO:…	K18270	RAB3 GTPase activating protein subunit 1[Source:MGI Symbol;Acc:MGI:2445001]
MGP_C57BL6NJ_G0016829	9079	365	3.26729	395	2.82812	542	2.74625	334	3.84189	448	5.20764	235	2.57306	1	136103706	136272002	-	9079	Zranb3	GO:0000166;GO:0000733;GO:0003676;GO:0003824;GO:0004386;GO:0004518;GO:0004519;GO:0004519;GO:0004520;GO:0004520;GO:0004520;GO:0005524;GO:0005524;GO:0005634;GO:0005634;GO:0005634;GO:0005694;GO:0006281;GO:0006281;GO:0006281;GO:0006974;GO:0006974;GO:0006974;GO:0008152;GO:0009411;GO:0009411;GO:0016787;GO:0031297;GO:0031297;GO:0031297;GO:0032508;GO:0036292;GO:0036292;GO:0036292;GO:0036310;GO:0036310;GO:…	-	zinc finger, RAN-binding domain containing 3[Source:MGI Symbol;Acc:MGI:1918362]
MGP_C57BL6NJ_G0016830	31314	3329	8.6399	3566	7.40255	676	0.993085	2011	6.70672	2554	8.60762	1684	5.34594	1	136272256	136414212	+	31314	R3hdm1	-	-	R3H domain containing 1 [Source:MGISymbol;Acc:MGI:2448514]
MGP_C57BL6NJ_G0016831	4659	2347	40.9406	2668	37.2248	1561	15.413	1452	32.547	1340	30.3538	1385	29.5514	1	136420500	136456926	+	4659	Ubxn4	-	-	UBX domain protein 4 [Source:MGISymbol;Acc:MGI:1915062]
MGP_C57BL6NJ_G0016832	6406	30	0.380599	0	0	0	0	4	0.0652093	8	0.131796	2	0.0310359	1	136464726	136516937	-	6406	Lct	GO:0000016;GO:0000016;GO:0001666;GO:0004553;GO:0005887;GO:0005903;GO:0005975;GO:0007584;GO:0008152;GO:0008422;GO:0010033;GO:0010040;GO:0010045;GO:0010288;GO:0016020;GO:0016021;GO:0016740;GO:0016787;GO:0016798;GO:0042493;GO:0045471;GO:1901657;	K01229	lactase [Source:MGI Symbol;Acc:MGI:104576]"
MGP_C57BL6NJ_G0016833	4666	833	14.5089	1100	15.3245	711	7.00976	941	21.0611	919	20.786	779	16.5964	1	136520209	136550619	-	4666	Mcm6	GO:0000166;GO:0000784;GO:0003677;GO:0003677;GO:0003678;GO:0003678;GO:0003678;GO:0003697;GO:0003697;GO:0004003;GO:0004003;GO:0004386;GO:0005515;GO:0005515;GO:0005524;GO:0005524;GO:0005634;GO:0005634;GO:0005634;GO:0005634;GO:0005654;GO:0006260;GO:0006260;GO:0006268;GO:0006268;GO:0006270;GO:0007049;GO:0016787;GO:0042555;GO:0042555;GO:0042555;GO:0042802;	K02542	minichromosome maintenance complex component 6[Source:MGI Symbol;Acc:MGI:1298227]
MGP_C57BL6NJ_G0016834	4358	1278	23.8329	1669	24.8948	991	10.4608	757	18.1403	772	18.6952	810	18.4765	1	136554662	136611717	-	4358	Dars	GO:0000166;GO:0000166;GO:0003676;GO:0003723;GO:0003723;GO:0004812;GO:0004812;GO:0004815;GO:0004815;GO:0004815;GO:0004815;GO:0005524;GO:0005524;GO:0005737;GO:0005737;GO:0005737;GO:0005737;GO:0005829;GO:0005829;GO:0006412;GO:0006418;GO:0006422;GO:0006422;GO:0006422;GO:0016020;GO:0016874;GO:0017101;GO:0017101;GO:0017101;GO:0017101;GO:0045202;GO:0045202;GO:0070062;	K22503	aspartyl-tRNA synthetase [Source:MGISymbol;Acc:MGI:2442544]
MGP_C57BL6NJ_G0016835	1808	1394	62.6611	1243	44.6901	1490	37.9111	1308	75.552	1584	92.4608	1966	108.095	1	136797810	136804418	-	1808	Cxcr4	GO:0004871;GO:0004930;GO:0004930;GO:0004950;GO:0006935;GO:0007165;GO:0007186;GO:0007186;GO:0016020;GO:0016021;GO:0016021;GO:0019955;GO:0070098;	K04189	chemokine (C-X-C motif) receptor 4 [Source:MGISymbol;Acc:MGI:109563]
MGP_C57BL6NJ_G0016836	12093	0	0	0	0	0	0	0	0	0	0	0	0	1	137542691	138526720	+	12093	Thsd7b	-	-	thrombospondin, type I, domain containing 7B[Source:MGI Symbol;Acc:MGI:2443925]
MGP_C57BL6NJ_G0016837	2955	161	4.42794	96	2.1118	2	0.0311351	331	11.6979	346	12.3572	266	8.94839	1	138712873	138818146	-	2955	-	-	-	-
MGP_C57BL6NJ_G0016838	1161	0	0	0	0	0	0	0	0	0	0	0	0	1	138747856	138767022	-	1161	Cd55b	GO:0016020;GO:0016021;	K04006	CD55 molecule, decay accelerating factor forcomplement B [Source:MGI Symbol;Acc:MGI:104849]
MGP_C57BL6NJ_G0016839	2121	0	0	0	0	0	0	0	0	0	0	0	0	1	138954584	139005747	-	2121	Zp3r	-	K04002	zona pellucida 3 receptor [Source:MGISymbol;Acc:MGI:104965]
MGP_C57BL6NJ_G0016840	6730	0	0	0	0	0	0	0	0	0	0	0	0	1	139010851	139038324	-	6730	C4bp	GO:0002376;GO:0005515;GO:0005576;GO:0006958;GO:0045087;	K04002	complement component 4 binding protein [Source:MGISymbol;Acc:MGI:88229]
MGP_C57BL6NJ_G0016841	1909	7	0.298006	5	0.170256	0	0	0	0	0	0	0	0	1	139048802	139096240	-	1909	Gm29427	GO:0003824;GO:0003873;GO:0003873;GO:0005524;GO:0006000;GO:0006003;GO:0008152;GO:0016301;GO:0016310;GO:0016740;GO:0046835;	-	predicted gene 29427 [Source:MGISymbol;Acc:MGI:5580133]
MGP_C57BL6NJ_G0016842	6295	159	2.05274	189	1.95166	205	1.49808	55	0.912438	60	1.0059	27	0.426372	1	139069608	139110456	-	6295	-	-	-	-
MGP_C57BL6NJ_G0016843	6127	709	9.40442	690	7.32049	129	0.968546	467	7.95986	427	7.35497	386	6.26268	1	139097768	139105561	+	6127	Yod1	GO:0003676;GO:0004843;GO:0004843;GO:0004843;GO:0004843;GO:0005634;GO:0005737;GO:0005737;GO:0005829;GO:0006508;GO:0006986;GO:0008233;GO:0008234;GO:0016236;GO:0016236;GO:0016579;GO:0016579;GO:0016787;GO:0030433;GO:0030433;GO:0030433;GO:0030433;GO:0030968;GO:0030968;GO:0030968;GO:0031625;GO:0035523;GO:0035523;GO:0035871;GO:0035871;GO:0036459;GO:0046872;GO:0070536;GO:0070536;GO:0071108;GO:0071108;GO:…	K13719	YOD1 deubiquitinase [Source:MGISymbol;Acc:MGI:2442596]
MGP_C57BL6NJ_G0016844	3640	12	0.267925	16	0.285731	16	0.202207	1	0.0286903	2	0.0579868	2	0.0546197	1	139113179	139127624	+	3640	AA986860	GO:0003674;GO:0005737;GO:0005737;GO:0005737;GO:0005829;GO:0005886;GO:0008150;GO:0070062;	-	expressed sequence AA986860 [Source:MGISymbol;Acc:MGI:2138143]
MGP_C57BL6NJ_G0016845	1911	0	0	0	0	0	0	0	0	0	0	0	0	1	139201233	139215057	+	1911	Fcamr	GO:0001791;GO:0002250;GO:0002376;GO:0004888;GO:0005886;GO:0006955;GO:0007165;GO:0016020;GO:0016021;GO:0019862;GO:0001791;GO:0004888;GO:0019862;	K16851	Fc receptor, IgA, IgM, high affinity [Source:MGISymbol;Acc:MGI:1927803]
MGP_C57BL6NJ_G0016846	3989	48	0.977937	0	0	0	0	11	0.287982	17	0.449765	9	0.224285	1	139227017	139252527	+	3989	Pigr	GO:0001580;GO:0001792;GO:0002415;GO:0005154;GO:0005576;GO:0005615;GO:0005886;GO:0005886;GO:0007173;GO:0016020;GO:0016021;GO:0030133;GO:0038093;GO:0043113;GO:0043235;GO:0055038;GO:0070062;	K13073	polymeric immunoglobulin receptor [Source:MGISymbol;Acc:MGI:103080]
MGP_C57BL6NJ_G0016847	1736	2	0.0936297	0	0	0	0	17	1.02267	13	0.790304	0	0	1	139267276	139282244	+	1736	Fcmr	GO:0016020;GO:0016021;	-	Fc fragment of IgM receptor [Source:MGISymbol;Acc:MGI:1916419]
MGP_C57BL6NJ_G0016848	1386	0	0	0	0	0	0	0	0	0	0	0	0	1	139283527	139288907	-	1386	Il24	-	K22668	interleukin 24 [Source:MGI Symbol;Acc:MGI:2135548]"
MGP_C57BL6NJ_G0016849	1186	0	0	0	0	0	0	0	0	0	0	0	0	1	139313367	139317183	-	1186	Il20	GO:0005102;GO:0005125;GO:0005125;GO:0005125;GO:0005576;GO:0005615;GO:0005615;GO:0005615;GO:0005622;GO:0007262;GO:0010469;GO:0030097;GO:0045517;GO:0045517;GO:0045517;GO:0045518;GO:0045518;GO:0045672;GO:0045672;	K22667	interleukin 20 [Source:MGI Symbol;Acc:MGI:1890473]"
MGP_C57BL6NJ_G0016850	1149	0	0	0	0	0	0	0	0	0	0	0	0	1	139336280	139343777	-	1149	Il19	GO:0005125;GO:0005576;GO:0005615;GO:0006915;GO:0010469;GO:0010989;GO:0010989;GO:0016020;GO:0016021;GO:0042226;GO:0042226;GO:0072593;GO:0072593;GO:2001235;GO:2001235;GO:2001237;GO:2001237;GO:2001244;GO:2001244;	K05444	interleukin 19 [Source:MGI Symbol;Acc:MGI:1890472]"
MGP_C57BL6NJ_G0016851	1310	10	0.620386	37	1.83599	32	1.12372	18	1.43495	29	2.33629	6	0.455303	1	139427000	139433080	+	1310	Il10	GO:0001818;GO:0001938;GO:0001938;GO:0002237;GO:0002740;GO:0002875;GO:0002875;GO:0002904;GO:0005125;GO:0005125;GO:0005125;GO:0005125;GO:0005141;GO:0005576;GO:0005576;GO:0005615;GO:0005615;GO:0005615;GO:0006954;GO:0006955;GO:0006955;GO:0008285;GO:0008285;GO:0010468;GO:0030886;GO:0030886;GO:0030889;GO:0032689;GO:0032689;GO:0032695;GO:0032695;GO:0032715;GO:0032720;GO:0032720;GO:0032800;GO:0034115;GO:…	K05443	interleukin 10 [Source:MGI Symbol;Acc:MGI:96537]"
MGP_C57BL6NJ_G0016852	3041	501	13.3892	1480	31.6362	13824	209.12	542	18.6131	519	18.0116	742	24.2554	1	139465327	139510336	-	3041	Mapkapk2	GO:0000166;GO:0002224;GO:0002224;GO:0002224;GO:0004672;GO:0004674;GO:0004674;GO:0004674;GO:0004683;GO:0004871;GO:0005515;GO:0005515;GO:0005516;GO:0005524;GO:0005524;GO:0005634;GO:0005634;GO:0005634;GO:0005634;GO:0005654;GO:0005737;GO:0005737;GO:0005737;GO:0005737;GO:0005813;GO:0006468;GO:0006468;GO:0006468;GO:0006954;GO:0006954;GO:0006954;GO:0006974;GO:0006974;GO:0009931;GO:0016301;GO:0016310;GO:…	K04443	MAP kinase-activated protein kinase 2 [Source:MGISymbol;Acc:MGI:109298]
MGP_C57BL6NJ_G0016853	3178	12	0.306875	22	0.449995	57	0.825086	0	0	0	0	8	0.25024	1	139546225	139558153	-	3178	Dyrk3	GO:0000166;GO:0000287;GO:0000287;GO:0000287;GO:0004672;GO:0004672;GO:0004672;GO:0004672;GO:0004674;GO:0004674;GO:0004674;GO:0004712;GO:0004713;GO:0004713;GO:0005515;GO:0005524;GO:0005524;GO:0005524;GO:0005524;GO:0005634;GO:0005634;GO:0005654;GO:0005737;GO:0005737;GO:0005829;GO:0006468;GO:0006468;GO:0006468;GO:0006468;GO:0010494;GO:0010494;GO:0016301;GO:0016310;GO:0016740;GO:0018108;GO:0030218;GO:…	K18669	dual-specificity tyrosine-(Y)-phosphorylationregulated kinase 3 [Source:MGI Symbol;Acc:MGI:1330300]
MGP_C57BL6NJ_G0016854	6994	130	1.51061	234	2.17485	841	5.53157	116	1.73208	121	1.82583	115	1.63453	1	139574505	139609455	+	6994	Eif2d	-	K15027	eukaryotic translation initiation factor 2D[Source:MGI Symbol;Acc:MGI:109342]
MGP_C57BL6NJ_G0016855	3843	194	4.10265	426	7.20573	403	4.82406	316	8.58723	311	8.54065	268	6.93243	1	139598583	139675600	-	3843	Rassf5	GO:0005515;GO:0005515;GO:0005634;GO:0005634;GO:0005737;GO:0005856;GO:0005874;GO:0006915;GO:0007165;GO:0008285;GO:0008285;GO:0017016;GO:0031398;GO:0031398;GO:0035556;GO:0042802;GO:0042981;GO:0046872;GO:1900180;GO:1900180;	K08015	Ras association (RalGDS/AF-6) domain family member5 [Source:MGI Symbol;Acc:MGI:1926375]
MGP_C57BL6NJ_G0016856	9018	852	7.67826	1282	9.24095	2784	14.2016	1065	12.3332	1499	17.5425	1285	14.1649	1	139684685	139713193	-	9018	Ikbke	GO:0008384;GO:0010884;GO:0031625;GO:0034340;GO:0036435;GO:0098586;	K07211	inhibitor of kappaB kinase epsilon [Source:MGISymbol;Acc:MGI:1929612]
MGP_C57BL6NJ_G0016857	12560	4044	26.1671	4087	21.1521	2120	7.7647	5368	44.6333	6657	55.9358	5103	40.3884	1	139720314	139980912	-	12560	Srgap2	GO:0003363;GO:0005096;GO:0005096;GO:0005096;GO:0005634;GO:0005654;GO:0005737;GO:0005737;GO:0005743;GO:0005743;GO:0005829;GO:0005829;GO:0005829;GO:0005886;GO:0005886;GO:0005886;GO:0007165;GO:0007399;GO:0014069;GO:0014069;GO:0016020;GO:0021816;GO:0021816;GO:0030027;GO:0030027;GO:0030054;GO:0030336;GO:0031410;GO:0034446;GO:0042802;GO:0042803;GO:0042803;GO:0042803;GO:0042995;GO:0043197;GO:0043547;GO:…	K07526	SLIT-ROBO Rho GTPase activating protein 2[Source:MGI Symbol;Acc:MGI:109605]
MGP_C57BL6NJ_G0016858	2191	34	1.26116	22	0.652708	9	0.188964	65	3.09819	59	2.84191	53	2.40466	1	139981463	139993432	+	2191	Fam72a	GO:0003674;GO:0005737;GO:0005739;GO:0005829;GO:0005829;GO:0016020;GO:0016020;GO:0031552;GO:0043065;GO:0043231;	-	family with sequence similarity 72, member A[Source:MGI Symbol;Acc:MGI:1919669]
MGP_C57BL6NJ_G0016859	4023	0	0	0	0	0	0	0	0	0	0	0	0	1	140055946	140069915	+	4023	Avpr1b	GO:0001992;GO:0001992;GO:0001992;GO:0004871;GO:0004930;GO:0004930;GO:0005000;GO:0005000;GO:0005000;GO:0005886;GO:0005886;GO:0005887;GO:0007165;GO:0007186;GO:0007186;GO:0007186;GO:0016020;GO:0016021;GO:0016021;GO:0016021;GO:0017046;GO:0032870;GO:0042277;GO:0042803;GO:0045907;GO:1901652;	K04227	arginine vasopressin receptor 1B [Source:MGISymbol;Acc:MGI:1347010]
MGP_C57BL6NJ_G0016860	3170	0	0	0	0	0	0	14	0.461217	13	0.432798	0	0	1	140099241	140135235	+	3170	Ctse	GO:0004190;GO:0004190;GO:0004190;GO:0004190;GO:0004190;GO:0005768;GO:0005768;GO:0005768;GO:0005768;GO:0006508;GO:0006508;GO:0006508;GO:0008233;GO:0016540;GO:0016540;GO:0016787;GO:0019886;GO:0019886;GO:0019886;GO:0030163;GO:0042803;GO:0042803;GO:0070062;	K01382	cathepsin E [Source:MGI Symbol;Acc:MGI:107361]"
MGP_C57BL6NJ_G0016861	4618	1516	26.6796	2171	30.5594	3049	30.3726	1927	43.5777	1842	42.0956	1984	42.7079	1	140146688	140173000	+	4618	Rab7b	GO:0000166;GO:0003924;GO:0003924;GO:0005525;GO:0005525;GO:0005764;GO:0005764;GO:0005764;GO:0005764;GO:0005768;GO:0005770;GO:0005770;GO:0005770;GO:0005770;GO:0005774;GO:0005794;GO:0005794;GO:0005802;GO:0005802;GO:0006810;GO:0006886;GO:0008333;GO:0015031;GO:0016020;GO:0030670;GO:0031410;GO:0032482;GO:0032755;GO:0032755;GO:0034144;GO:0034144;GO:0034164;GO:0034164;GO:0034499;GO:0034499;GO:0045335;GO:…	K07898	RAB7B, member RAS oncogene family [Source:MGISymbol;Acc:MGI:2442295]
MGP_C57BL6NJ_G0016862	5212	5	0.0779649	0	0	6	0.0529572	4	0.0801479	2	0.0404973	3	0.0572187	1	140204909	140232374	+	5212	Slc26a9	GO:0005254;GO:0006810;GO:0006811;GO:0006821;GO:0008271;GO:0008271;GO:0008272;GO:0015116;GO:0015301;GO:0015701;GO:0016020;GO:0016020;GO:0016021;GO:0016021;GO:0055085;GO:0098656;GO:1902358;GO:1902476;	K14706	solute carrier family 26, member 9 [Source:MGISymbol;Acc:MGI:2444594]
MGP_C57BL6NJ_G0016863	7028	2	0.0231277	12	0.110991	3	0.0196367	2	0.029719	7	0.105116	0	0	1	140261481	140285572	+	7028	Pm20d1	GO:0005576;GO:0005615;GO:0005615;GO:0006508;GO:0006520;GO:0006520;GO:0006520;GO:0008152;GO:0008233;GO:0016787;GO:0016787;GO:0016811;GO:0016811;GO:0016829;GO:0043604;GO:0043604;GO:0043604;GO:0043605;GO:0043605;GO:0043605;GO:0044255;GO:0044255;GO:0044255;GO:0046872;GO:0070062;GO:0097009;GO:0097009;GO:1901215;GO:1990845;GO:1990845;GO:2000275;GO:2000275;	K13049	peptidase M20 domain containing 1 [Source:MGISymbol;Acc:MGI:2442939]
MGP_C57BL6NJ_G0016864	4912	141	2.33289	229	3.03051	284	2.65973	30	0.637822	53	1.13872	70	1.41664	1	140292699	140314371	+	4912	Slc41a1	GO:0070838;GO:0071286;GO:0072509;GO:1903830;	K15122	solute carrier family 41, member 1 [Source:MGISymbol;Acc:MGI:2444823]
MGP_C57BL6NJ_G0016865	1468	106	5.86831	143	6.33211	416	13.036	74	5.26432	79	5.67939	74	5.01102	1	140333174	140339403	+	1468	Rab29	GO:0003924;GO:0005525;GO:0005794;GO:0005802;GO:0005829;GO:0016192;GO:0031982;	K07916	RAB29, member RAS oncogene family [Source:MGISymbol;Acc:MGI:2385107]
MGP_C57BL6NJ_G0016866	6779	2854	34.2154	3313	31.7683	1126	7.64101	1483	22.8461	1586	24.691	1616	23.6972	1	140400197	140428880	+	6779	Nucks1	GO:0000724;GO:0000785;GO:0000790;GO:0001077;GO:0001678;GO:0003682;GO:0003690;GO:0003697;GO:0003723;GO:0005634;GO:0005634;GO:0005634;GO:0005730;GO:0005737;GO:0005737;GO:0006275;GO:0006325;GO:0006357;GO:0006366;GO:0008134;GO:0019046;GO:0031297;GO:0036297;GO:0042593;GO:0043923;GO:0044829;GO:0045944;GO:0046626;GO:0046628;GO:0060382;GO:0071481;GO:1990968;GO:1990969;GO:0000785;GO:0001077;GO:0001678;GO:…	-	nuclear casein kinase and cyclin-dependent kinasesubstrate 1 [Source:MGI Symbol;Acc:MGI:1934811]
MGP_C57BL6NJ_G0016867	3563	82	1.87039	96	1.75144	524	6.7654	0	0	0	0	0	0	1	140458781	140478815	+	3563	Slc45a3	GO:0005575;GO:0006810;GO:0008506;GO:0010907;GO:0015770;GO:0016020;GO:0016021;GO:0016021;GO:0045723;GO:0048713;GO:0055085;GO:0008506;GO:0010907;GO:0015770;GO:0045723;GO:0048713;	K15379	solute carrier family 45, member 3 [Source:MGISymbol;Acc:MGI:1922082]
MGP_C57BL6NJ_G0016868	6410	1207	15.3032	1666	16.8949	798	5.72695	1132	18.4427	1326	21.8316	1115	17.2917	1	140506180	140532287	+	6410	Elk4	GO:0000122;GO:0000122;GO:0000978;GO:0000981;GO:0003677;GO:0003682;GO:0003682;GO:0003700;GO:0005634;GO:0005634;GO:0005654;GO:0005829;GO:0006351;GO:0006355;GO:0006355;GO:0006357;GO:0030154;GO:0043565;GO:0045944;GO:0070932;GO:0070932;	K04376	ELK4, member of ETS oncogene family [Source:MGISymbol;Acc:MGI:102853]
MGP_C57BL6NJ_G0016869	7204	5	0.0564066	0	0	2	0.0127713	0	0	0	0	1	0.013799	1	140522469	140569104	-	7204	Mfsd4a	GO:0005355;GO:0005575;GO:0006810;GO:0008150;GO:0016020;GO:0016021;GO:0016021;GO:0055085;GO:1904659;	-	major facilitator superfamily domain containing 4A[Source:MGI Symbol;Acc:MGI:2442786]
MGP_C57BL6NJ_G0016870	4764	1984	33.8457	3961	54.047	7295	70.442	2061	45.1796	1905	42.2011	2602	54.2946	1	140615411	140644362	-	4764	Cdk18	GO:0000166;GO:0004672;GO:0004674;GO:0004674;GO:0004693;GO:0005524;GO:0005524;GO:0005634;GO:0005737;GO:0006468;GO:0006468;GO:0016301;GO:0016310;GO:0016740;GO:0051726;	K15596	cyclin-dependent kinase 18 [Source:MGISymbol;Acc:MGI:97518]
MGP_C57BL6NJ_G0016871	9289	0	0	0	0	0	0	0	0	0	0	0	0	1	140698363	140771337	+	9289	Lemd1	GO:0003674;GO:0005575;GO:0008150;GO:0016020;GO:0016021;	-	LEM domain containing 1 [Source:MGISymbol;Acc:MGI:1922403]
MGP_C57BL6NJ_G0016872	720	0	0	0	0	0	0	0	0	0	0	0	0	1	140737914	140738633	-	720	Gm10188	GO:0003674;GO:0005575;GO:0008150;	-	predicted gene 10188 [Source:MGISymbol;Acc:MGI:3704196]
MGP_C57BL6NJ_G0016873	4268	23	0.437962	69	1.05091	5	0.0538919	13	0.318094	0	0	0	0	1	140815474	140824204	+	4268	Klhdc8a	GO:0004842;GO:0016567;GO:0031463;	-	kelch domain containing 8A [Source:MGISymbol;Acc:MGI:2442630]
MGP_C57BL6NJ_G0016874	3920	169	3.50376	393	6.51696	734	8.61367	159	4.23592	174	4.68451	133	3.37277	1	140834186	140852923	+	3920	Nuak2	GO:0000166;GO:0000287;GO:0000287;GO:0004672;GO:0004674;GO:0004674;GO:0004674;GO:0005524;GO:0005524;GO:0005524;GO:0005634;GO:0005737;GO:0006468;GO:0006468;GO:0006468;GO:0006468;GO:0006915;GO:0016301;GO:0016310;GO:0016740;GO:0030036;GO:0030036;GO:0035556;GO:0042149;GO:0042149;GO:0042149;GO:0043066;GO:0043066;GO:0046872;	K08800	NUAK family, SNF1-like kinase, 2 [Source:MGISymbol;Acc:MGI:1921387]
MGP_C57BL6NJ_G0016875	5177	60	0.941904	82	1.02961	448	3.98087	26	0.524483	42	0.856193	52	0.998495	1	140876862	140911673	-	5177	Tmcc2	GO:0003674;GO:0005783;GO:0005783;GO:0016020;GO:0016021;GO:0042982;GO:0042982;	-	transmembrane and coiled-coil domains 2 [Source:MGISymbol;Acc:MGI:1916125]
MGP_C57BL6NJ_G0016876	9340	448	3.8982	728	5.06668	1067	5.25528	299	3.34319	509	5.75138	404	4.29987	1	140939058	140991377	+	9340	Dstyk	GO:0000166;GO:0004672;GO:0004674;GO:0004674;GO:0004712;GO:0004713;GO:0005524;GO:0005524;GO:0005737;GO:0005737;GO:0005737;GO:0005829;GO:0005886;GO:0006468;GO:0006468;GO:0016020;GO:0016301;GO:0016310;GO:0016323;GO:0016323;GO:0016323;GO:0016324;GO:0016324;GO:0016324;GO:0016740;GO:0018108;GO:0030054;GO:0033674;GO:0033674;GO:0035556;GO:0043066;GO:0043066;GO:0044344;GO:0044344;GO:0045743;GO:0045743;GO:…	K16288	dual serine/threonine and tyrosine protein kinase[Source:MGI Symbol;Acc:MGI:1925064]
MGP_C57BL6NJ_G0016877	3935	1026	21.1903	1218	20.1206	870	10.1707	1077	28.583	1027	27.544	1125	28.4203	1	141001774	141033626	+	3935	Rbbp5	GO:0005515;GO:0005515;GO:0005634;GO:0005634;GO:0005654;GO:0005730;GO:0006325;GO:0006351;GO:0006355;GO:0006974;GO:0016569;GO:0035064;GO:0035097;GO:0042800;GO:0043627;GO:0044212;GO:0044666;GO:0048188;GO:0048188;GO:0048188;GO:0051568;GO:0071339;GO:0071339;GO:0051568;	K14961	retinoblastoma binding protein 5 [Source:MGISymbol;Acc:MGI:1918367]
MGP_C57BL6NJ_G0016878	2018	64	2.57746	56	1.80387	77	1.75529	57	2.94978	47	2.45798	48	2.36451	1	141034192	141036601	+	2018	Tmem81	GO:0003674;GO:0005575;GO:0008150;GO:0016020;GO:0016021;	-	transmembrane protein 81 [Source:MGISymbol;Acc:MGI:1921876]
MGP_C57BL6NJ_G0016879	9304	0	0	0	0	0	0	0	0	0	0	0	0	1	141037389	141077704	-	9304	Cntn2	GO:0000226;GO:0001764;GO:0005515;GO:0005886;GO:0005886;GO:0007155;GO:0007160;GO:0007399;GO:0007409;GO:0007411;GO:0007413;GO:0007612;GO:0007628;GO:0008076;GO:0009986;GO:0010769;GO:0010954;GO:0016020;GO:0021853;GO:0022010;GO:0030246;GO:0030424;GO:0031133;GO:0031175;GO:0031175;GO:0031225;GO:0031623;GO:0033268;GO:0043005;GO:0043025;GO:0043209;GO:0043621;GO:0044224;GO:0045163;GO:0045202;GO:0045665;GO:…	-	contactin 2 [Source:MGI Symbol;Acc:MGI:104518]"
MGP_C57BL6NJ_G0016880	8214	0	0	0	0	0	0	0	0	1	0.0128483	0	0	1	141104236	141279997	-	8214	Nfasc	GO:0002175;GO:0005515;GO:0005622;GO:0005886;GO:0005886;GO:0005886;GO:0005918;GO:0005925;GO:0007155;GO:0007411;GO:0007411;GO:0007422;GO:0016020;GO:0016021;GO:0019226;GO:0019226;GO:0019904;GO:0030424;GO:0030425;GO:0030913;GO:0033010;GO:0033268;GO:0033270;GO:0033270;GO:0034113;GO:0042552;GO:0043194;GO:0043209;GO:0045162;GO:0050808;GO:0050808;GO:0070062;GO:0071205;GO:0072659;GO:0086080;GO:0097454;GO:…	K06757	neurofascin [Source:MGI Symbol;Acc:MGI:104753]"
MGP_C57BL6NJ_G0016881	3595	0	0	0	0	0	0	0	0	0	0	0	0	1	141438555	141498485	+	3595	Lrrn2	GO:0003674;GO:0005578;GO:0005615;GO:0007409;GO:0016020;GO:0016021;GO:0031012;	-	leucine rich repeat protein 2, neuronal [Source:MGISymbol;Acc:MGI:106037]
MGP_C57BL6NJ_G0016882	13732	625	3.69896	864	4.08996	143	0.47905	393	2.98879	767	5.89471	478	3.46031	1	141517984	141615698	-	13732	Mdm4	GO:0000122;GO:0000122;GO:0002027;GO:0003170;GO:0003181;GO:0003203;GO:0003281;GO:0003283;GO:0005515;GO:0005634;GO:0005634;GO:0005634;GO:0006461;GO:0008283;GO:0008284;GO:0019899;GO:0030330;GO:0042177;GO:0042177;GO:0043066;GO:0045023;GO:0046872;GO:0065003;GO:0071157;	-	transformed mouse 3T3 cell double minute 4[Source:MGI Symbol;Acc:MGI:107934]
MGP_C57BL6NJ_G0016883	9105	2	0.0178519	18	0.128508	59	0.298092	2	0.0229396	1	0.011591	0	0	1	141631253	141698855	+	9105	Pik3c2b	GO:0001727;GO:0005515;GO:0005654;GO:0005737;GO:0005829;GO:0005886;GO:0005942;GO:0009267;GO:0014065;GO:0016020;GO:0016236;GO:0016301;GO:0016301;GO:0016303;GO:0016310;GO:0016477;GO:0016740;GO:0030139;GO:0035005;GO:0035091;GO:0036092;GO:0036092;GO:0043491;GO:0046854;GO:0046854;GO:0048015;GO:0048015;GO:0048015;GO:1905037;GO:0001727;GO:0009267;GO:0016236;GO:0030139;GO:0036092;GO:0043491;GO:1905037;	-	phosphoinositide-3-kinase, class 2, betapolypeptide [Source:MGI Symbol;Acc:MGI:2685045]
MGP_C57BL6NJ_G0016884	5594	1371	19.9181	2065	23.9959	3697	30.4022	802	14.9723	976	18.4132	814	14.4651	1	141722030	141732441	+	5594	Ppp1r15b	GO:0000164;GO:0000164;GO:0000164;GO:0000164;GO:0001933;GO:0005737;GO:0005783;GO:0006417;GO:0006446;GO:0006979;GO:0006979;GO:0006983;GO:0006983;GO:0019888;GO:0019888;GO:0019888;GO:0032516;GO:0034976;GO:0034976;GO:0034976;GO:0042542;GO:0042542;GO:0043666;GO:0050790;GO:0070262;GO:0070262;GO:1903912;GO:1903912;	K17558	protein phosphatase 1, regulatory (inhibitor)subunit 15b [Source:MGI Symbol;Acc:MGI:2444211]
MGP_C57BL6NJ_G0016885	10579	9	0.0691403	55	0.337953	23	0.100014	8	0.0789736	0	0	0	0	1	141844387	141905893	+	10579	Plekha6	GO:0003674;GO:0005575;GO:0008150;	-	pleckstrin homology domain containing, family Amember 6 [Source:MGI Symbol;Acc:MGI:2388662]
MGP_C57BL6NJ_G0016886	1919	0	0	0	0	0	0	0	0	0	0	0	0	1	141911962	141927905	+	1919	Golt1a	GO:0000137;GO:0000139;GO:0005635;GO:0005783;GO:0005783;GO:0005794;GO:0005802;GO:0006810;GO:0015031;GO:0016020;GO:0016021;GO:0016192;	-	golgi transport 1A [Source:MGISymbol;Acc:MGI:1915588]
MGP_C57BL6NJ_G0016887	741	0	0	0	0	0	0	0	0	0	0	0	0	1	141911989	141934601	+	741	-	-	K23140	-
MGP_C57BL6NJ_G0016888	1465	0	0	0	0	0	0	0	0	0	0	0	0	1	141911989	141934780	+	1465	-	-	-	-
MGP_C57BL6NJ_G0016889	1657	0	0	0	0	0	0	0	0	0	0	0	0	1	141957786	141969405	+	1657	Ren1	GO:0001822;GO:0001823;GO:0001823;GO:0002003;GO:0002003;GO:0002003;GO:0002016;GO:0002016;GO:0002018;GO:0002018;GO:0004175;GO:0004175;GO:0004190;GO:0004190;GO:0004190;GO:0004190;GO:0005102;GO:0005159;GO:0005576;GO:0005615;GO:0005615;GO:0005622;GO:0005622;GO:0005737;GO:0006508;GO:0006508;GO:0006508;GO:0006508;GO:0008217;GO:0008233;GO:0008233;GO:0008584;GO:0008584;GO:0009755;GO:0009755;GO:0010033;GO:…	K01380	renin 1 structural [Source:MGISymbol;Acc:MGI:97898]
MGP_C57BL6NJ_G0016890	4306	0	0	0	0	0	0	0	0	0	0	0	0	1	141972656	141989394	+	4306	Etnk2	GO:0001701;GO:0001890;GO:0004305;GO:0006646;GO:0009791;GO:0016310;GO:0035264;	K00894	ethanolamine kinase 2 [Source:MGISymbol;Acc:MGI:2443760]
MGP_C57BL6NJ_G0016891	4312	14	0.263866	9	0.135676	20	0.213368	1	0.0242191	7	0.171325	0	0	1	141992115	142037465	-	4312	Sox13	GO:0000977;GO:0003677;GO:0005634;GO:0005634;GO:0005634;GO:0005654;GO:0006351;GO:0006355;GO:0006355;GO:0043565;GO:0043565;GO:0045165;GO:0045586;GO:0045892;GO:0045944;GO:0000977;GO:0005634;GO:0043565;GO:0045586;	-	SRY (sex determining region Y)-box 13 [Source:MGISymbol;Acc:MGI:98361]
MGP_C57BL6NJ_G0016892	1323	71	4.36146	135	6.63304	205	7.12807	71	5.60447	63	5.02553	94	7.06299	1	142228183	142234547	-	1323	Snrpe	GO:0000387;GO:0000387;GO:0000398;GO:0003723;GO:0005634;GO:0005634;GO:0005681;GO:0005681;GO:0005682;GO:0005683;GO:0005685;GO:0005685;GO:0005685;GO:0005686;GO:0005687;GO:0005687;GO:0005737;GO:0005829;GO:0006397;GO:0008380;GO:0030529;GO:0034709;GO:0034715;GO:0034719;GO:0042633;GO:0046540;GO:0071011;GO:1990446;	K11097	small nuclear ribonucleoprotein E [Source:MGISymbol;Acc:MGI:98346]
MGP_C57BL6NJ_G0016893	6031	387	5.21501	236	2.54367	23	0.175435	199	3.44588	215	3.76227	160	2.63725	1	142244163	142293574	-	6031	Zc3h11a	GO:0000346;GO:0000346;GO:0003723;GO:0003729;GO:0005622;GO:0006810;GO:0016973;GO:0016973;GO:0016973;GO:0046872;GO:0046872;GO:0051028;	K22415	zinc finger CCCH type containing 11A [Source:MGISymbol;Acc:MGI:1917829]
MGP_C57BL6NJ_G0016894	10156	27	0.21606	17	0.108809	4	0.0181182	6	0.0616971	11	0.114306	7	0.0685167	1	142244241	142293512	-	10156	Gm38394	GO:0000122;GO:0000122;GO:0000977;GO:0003677;GO:0003677;GO:0003700;GO:0005634;GO:0005634;GO:0005730;GO:0005730;GO:0006351;GO:0006355;GO:0045892;GO:0045892;GO:0046872;GO:0046983;	-	predicted gene, 38394 [Source:MGISymbol;Acc:MGI:5614057]
MGP_C57BL6NJ_G0016895	5007	0	0	0	0	0	0	0	0	0	0	0	0	1	142286988	142291994	-	5007	Zbed6	GO:0000122;GO:0000122;GO:0000977;GO:0003677;GO:0003677;GO:0003700;GO:0005634;GO:0005634;GO:0005730;GO:0005730;GO:0006351;GO:0006355;GO:0045892;GO:0045892;GO:0046872;GO:0046983;	-	zinc finger, BED type containing 6 [Source:MGISymbol;Acc:MGI:3828086]
MGP_C57BL6NJ_G0016896	2309	7	0.246381	1	0.0281524	11	0.219153	33	1.49254	48	2.19391	45	1.93736	1	142312664	142323681	-	2309	Lax1	GO:0000188;GO:0002250;GO:0002376;GO:0005794;GO:0005829;GO:0005886;GO:0005886;GO:0006955;GO:0006955;GO:0016020;GO:0016020;GO:0016021;GO:0016021;GO:0019901;GO:0035556;GO:0042113;GO:0042169;GO:0046649;GO:0046649;GO:0048305;GO:0048305;GO:0050851;GO:0050851;GO:0050868;GO:0051249;	-	lymphocyte transmembrane adaptor 1 [Source:MGISymbol;Acc:MGI:2443362]
MGP_C57BL6NJ_G0016897	12213	797	5.30358	1170	6.22734	562	2.11686	158	1.35105	104	0.898694	61	0.49651	1	142332704	142445684	-	12213	Atp2b4	GO:0000166;GO:0000166;GO:0005388;GO:0005388;GO:0005388;GO:0005388;GO:0005516;GO:0005516;GO:0005524;GO:0005524;GO:0005886;GO:0005886;GO:0005887;GO:0005887;GO:0005929;GO:0006357;GO:0006810;GO:0006811;GO:0006816;GO:0006816;GO:0006874;GO:0006874;GO:0006874;GO:0006874;GO:0010751;GO:0016020;GO:0016020;GO:0016020;GO:0016021;GO:0016021;GO:0016323;GO:0016787;GO:0017080;GO:0019901;GO:0030018;GO:0030165;GO:…	K05850	ATPase, Ca++ transporting, plasma membrane 4[Source:MGI Symbol;Acc:MGI:88111]
MGP_C57BL6NJ_G0016898	2575	21	0.662789	5	0.126221	0	0	0	0	0	0	0	0	1	142554168	142564968	-	2575	Optc	-	K08128	opticin [Source:MGI Symbol;Acc:MGI:2151113]"
MGP_C57BL6NJ_G0016899	3615	266	5.98008	339	6.09579	0	0	20	0.577774	0	0	23	0.632471	1	142567116	142578224	-	3615	Prelp	GO:0005201;GO:0005576;GO:0005576;GO:0005578;GO:0005578;GO:0005578;GO:0005615;GO:0005615;GO:0007569;GO:0007569;GO:0008201;GO:0008201;GO:0030021;GO:0031012;GO:0062023;GO:0062023;GO:0070062;GO:0070062;GO:1903561;	K08125	proline arginine-rich end leucine-rich repeat[Source:MGI Symbol;Acc:MGI:2151110]
MGP_C57BL6NJ_G0016900	3306	388	9.53811	756	14.8648	6	0.0834885	36	1.1372	4	0.12769	0	0	1	142699211	142715887	+	3306	Fmod	GO:0005576;GO:0005576;GO:0005578;GO:0005578;GO:0005578;GO:0005615;GO:0005615;GO:0005615;GO:0005622;GO:0030199;GO:0030199;GO:0031012;GO:0062023;GO:0062023;	K08121	fibromodulin [Source:MGI Symbol;Acc:MGI:1328364]"
MGP_C57BL6NJ_G0016901	2743	102	3.02209	185	4.38414	409	6.85924	66	2.51278	69	2.65475	88	3.18917	1	142745774	142749724	-	2743	Btg2	GO:0000122;GO:0001078;GO:0005515;GO:0005634;GO:0005737;GO:0006351;GO:0006355;GO:0006479;GO:0006479;GO:0006974;GO:0008285;GO:0008285;GO:0008285;GO:0008285;GO:0008306;GO:0008306;GO:0009952;GO:0009952;GO:0017148;GO:0017148;GO:0021542;GO:0021542;GO:0021954;GO:0021954;GO:0030182;GO:0031175;GO:0035914;GO:0035914;GO:0043066;GO:0043524;GO:0045930;GO:0060213;GO:0070062;GO:2000178;GO:2000178;	K14443	B cell translocation gene 2, anti-proliferative[Source:MGI Symbol;Acc:MGI:108384]
MGP_C57BL6NJ_G0016902	1826	0	0	0	0	0	0	0	0	0	0	0	0	1	142783415	142819920	+	1826	Chit1	GO:0000272;GO:0004553;GO:0004568;GO:0004568;GO:0005576;GO:0005576;GO:0005576;GO:0005615;GO:0005764;GO:0005975;GO:0005975;GO:0006030;GO:0006032;GO:0006032;GO:0006032;GO:0008061;GO:0008061;GO:0008061;GO:0008152;GO:0008843;GO:0016787;GO:0016798;	K01183	chitinase 1 (chitotriosidase) [Source:MGISymbol;Acc:MGI:1919134]
MGP_C57BL6NJ_G0016903	2862	0	0	7	0.158989	6	0.0964406	0	0	0	0	0	0	1	142853571	142863191	+	2862	Chil1	GO:0005515;GO:0005576;GO:0005576;GO:0005615;GO:0005615;GO:0005615;GO:0005737;GO:0005783;GO:0005975;GO:0006915;GO:0006954;GO:0007250;GO:0008061;GO:0008061;GO:0008061;GO:0008061;GO:0009612;GO:0010800;GO:0030324;GO:0030324;GO:0034612;GO:0045766;GO:0045766;GO:0045766;GO:0051897;GO:0051897;GO:0070062;GO:0070374;GO:0070374;GO:0070555;GO:0070741;GO:0071356;GO:0072606;GO:0005737;GO:0005783;GO:0007250;GO:…	K17523	chitinase-like 1 [Source:MGISymbol;Acc:MGI:1340899]
MGP_C57BL6NJ_G0016904	2329	0	0	0	0	0	0	0	0	0	0	0	0	1	142866458	142874242	+	2329	Mybph	GO:0005859;GO:0006941;GO:0007015;GO:0007155;GO:0008307;GO:0030018;GO:0031430;GO:0032982;GO:0045214;GO:0051015;GO:0051371;GO:0071688;GO:0097493;	-	myosin binding protein H [Source:MGISymbol;Acc:MGI:1858196]
MGP_C57BL6NJ_G0016905	5785	0	0	0	0	0	0	0	0	0	0	0	0	1	142872233	142909826	-	5785	Adora1	GO:0000186;GO:0001609;GO:0001609;GO:0001609;GO:0001659;GO:0001664;GO:0001666;GO:0001883;GO:0001973;GO:0002087;GO:0002674;GO:0002686;GO:0002793;GO:0003084;GO:0003085;GO:0003093;GO:0004629;GO:0004871;GO:0004930;GO:0004930;GO:0005515;GO:0005783;GO:0005886;GO:0005886;GO:0006612;GO:0007165;GO:0007186;GO:0007186;GO:0007186;GO:0007193;GO:0008285;GO:0012505;GO:0014050;GO:0014069;GO:0016020;GO:0016021;GO:…	K04265	adenosine A1 receptor [Source:MGISymbol;Acc:MGI:99401]
MGP_C57BL6NJ_G0016906	1495	0	0	0	0	0	0	0	0	0	0	0	0	1	142970311	142972870	+	1495	Myog	GO:0000977;GO:0000977;GO:0000977;GO:0000978;GO:0000978;GO:0000978;GO:0000978;GO:0000987;GO:0000987;GO:0001047;GO:0001047;GO:0001047;GO:0001077;GO:0001077;GO:0001228;GO:0001228;GO:0001228;GO:0001228;GO:0001503;GO:0001503;GO:0003677;GO:0003677;GO:0003677;GO:0003677;GO:0003700;GO:0003700;GO:0003700;GO:0003705;GO:0003705;GO:0005515;GO:0005634;GO:0005634;GO:0005634;GO:0005634;GO:0005634;GO:0005654;GO:…	K18483	myogenin [Source:MGI Symbol;Acc:MGI:97276]"
MGP_C57BL6NJ_G0016907	6681	5	0.0608222	112	1.08972	242	1.6663	29	0.453308	47	0.742433	29	0.431497	1	142976988	143034150	-	6681	Ppfia4	GO:0005515;GO:0008150;GO:0045202;GO:0045202;GO:0048786;	-	protein tyrosine phosphatase, receptor type, fpolypeptide (PTPRF), interacting protein (liprin), alpha 4[Source:MGI Symbol;Acc:MGI:1915757]
MGP_C57BL6NJ_G0016908	3564	297	6.77255	466	8.49938	969	12.5073	229	6.71018	257	7.6102	277	7.72615	1	143035545	143051212	-	3564	Tmem183a	GO:0003674;GO:0005575;GO:0008150;GO:0016020;GO:0016021;	-	transmembrane protein 183A [Source:MGISymbol;Acc:MGI:1914729]
MGP_C57BL6NJ_G0016909	1768	0	0	0	0	0	0	0	0	0	0	0	0	1	143077023	143082064	+	1768	4933406M09Rik	GO:0005975;GO:0016020;GO:0016758;	-	RIKEN cDNA 4933406M09 gene [Source:MGISymbol;Acc:MGI:3045320]
MGP_C57BL6NJ_G0016910	4437	380	6.9603	615	9.00999	1617	16.7648	277	6.51969	243	5.77986	232	5.1978	1	143097833	143104014	+	4437	Cyb5r1	GO:0005739;	K00326	cytochrome b5 reductase 1 [Source:MGISymbol;Acc:MGI:1919267]
MGP_C57BL6NJ_G0016911	4990	1684	27.4268	3617	47.118	7977	73.5389	1016	21.2632	945	19.9863	1334	26.5752	1	143107652	143125589	+	4990	Adipor1	GO:0004872;GO:0005515;GO:0005886;GO:0005886;GO:0005886;GO:0006629;GO:0006631;GO:0007186;GO:0009755;GO:0009755;GO:0010633;GO:0010719;GO:0010906;GO:0016020;GO:0016020;GO:0016021;GO:0016021;GO:0019216;GO:0019395;GO:0019395;GO:0019901;GO:0030308;GO:0031226;GO:0031226;GO:0033210;GO:0033211;GO:0033211;GO:0033211;GO:0038023;GO:0038023;GO:0042593;GO:0042802;GO:0046426;GO:0046427;GO:0046628;GO:0046872;GO:…	K07297	adiponectin receptor 1 [Source:MGISymbol;Acc:MGI:1919924]
MGP_C57BL6NJ_G0016912	11365	426	3.04631	568	3.24876	594	2.40434	126	1.15781	203	1.88507	132	1.15458	1	143149328	143190771	+	11365	Klhl12	-	-	kelch-like 12 [Source:MGI Symbol;Acc:MGI:2385619]"
MGP_C57BL6NJ_G0016913	2861	216	6.13577	298	6.77076	403	6.47986	170	6.20537	99	3.65189	159	5.52459	1	143194401	143212484	+	2861	Rabif	GO:0005085;GO:0005085;GO:0005085;GO:0005829;GO:0006810;GO:0006892;GO:0007264;GO:0008270;GO:0008270;GO:0008270;GO:0015031;GO:0016020;GO:0046872;GO:0065009;	K19952	RAB interacting factor [Source:MGISymbol;Acc:MGI:2138605]
MGP_C57BL6NJ_G0016914	1832	0	0	0	0	5	0.125552	0	0	0	0	0	0	1	143257523	143266256	-	1832	Mgat4e	GO:0005975;GO:0006486;GO:0016020;GO:0016740;GO:0016757;GO:0016758;	-	MGAT4 family, member E [Source:MGISymbol;Acc:MGI:1918251]
MGP_C57BL6NJ_G0016915	16571	2000	9.80877	2314	9.07723	1700	4.71931	921	5.80427	865	5.50894	959	5.75295	1	143276745	143358736	+	16571	Kdm5b	GO:0000122;GO:0001227;GO:0003677;GO:0003677;GO:0003682;GO:0003714;GO:0005515;GO:0005634;GO:0005634;GO:0005634;GO:0005829;GO:0006325;GO:0006351;GO:0006355;GO:0007338;GO:0007338;GO:0008270;GO:0008270;GO:0009791;GO:0009791;GO:0010628;GO:0010628;GO:0016491;GO:0016569;GO:0032452;GO:0032453;GO:0032453;GO:0033601;GO:0033601;GO:0034647;GO:0034647;GO:0034647;GO:0034648;GO:0034648;GO:0034720;GO:0034720;GO:…	K11446	lysine (K)-specific demethylase 5B [Source:MGISymbol;Acc:MGI:1922855]
MGP_C57BL6NJ_G0016916	7638	0	0	0	0	0	0	0	0	0	0	0	0	1	143370114	143492869	+	7638	Syt2	GO:0005544;GO:0007269;GO:0008021;GO:0016020;GO:0016020;GO:0016021;	-	synaptotagmin II [Source:MGI Symbol;Acc:MGI:99666]"
MGP_C57BL6NJ_G0016917	14983	1590	8.62446	2309	10.0176	2084	6.39848	1758	12.2534	2060	14.5101	1609	10.6753	1	143484934	143703952	-	14983	Ppp1r12b	GO:0003674;GO:0004857;GO:0005737;GO:0005737;GO:0007165;GO:0008150;GO:0019208;GO:0019208;GO:0019901;GO:0030018;GO:0030018;GO:0031672;GO:0031672;GO:0043086;GO:0050790;	K12329	protein phosphatase 1, regulatory (inhibitor)subunit 12B [Source:MGI Symbol;Acc:MGI:1916417]
MGP_C57BL6NJ_G0016918	4832	43	0.723228	43	0.578469	26	0.247528	52	1.12386	56	1.2231	54	1.11093	1	143710545	143723682	+	4832	Ube2t	GO:0000166;GO:0000209;GO:0003682;GO:0003682;GO:0004842;GO:0004842;GO:0005524;GO:0005634;GO:0005634;GO:0005634;GO:0005730;GO:0005737;GO:0006281;GO:0006281;GO:0006513;GO:0006513;GO:0006974;GO:0006974;GO:0006974;GO:0016567;GO:0016740;GO:0031625;GO:0031625;GO:0035519;GO:0035519;GO:0044314;GO:0044314;GO:0051865;GO:0051865;GO:0061630;GO:0061631;GO:0061631;GO:0070534;GO:0070534;GO:0070936;GO:0070936;GO:…	K13960	ubiquitin-conjugating enzyme E2T [Source:MGISymbol;Acc:MGI:1914446]
MGP_C57BL6NJ_G0016919	6808	132	1.57575	207	1.97647	0	0	21	0.322134	0	0	6	0.0876098	1	143733959	143864270	-	6808	Lgr6	GO:0003674;GO:0004871;GO:0004930;GO:0004930;GO:0005615;GO:0005886;GO:0007165;GO:0007186;GO:0007186;GO:0016020;GO:0016021;GO:0016021;GO:0016055;GO:0016500;GO:0030177;GO:0030335;GO:0031012;GO:0031982;GO:0042246;GO:1990523;GO:0042246;GO:1990523;	K08399	leucine-rich repeat-containing G protein-coupledreceptor 6 [Source:MGI Symbol;Acc:MGI:2441805]
MGP_C57BL6NJ_G0016920	6098	639	8.51622	1012	10.7878	1533	11.5647	610	10.4467	787	13.6203	890	14.5085	1	143895378	143908818	+	6098	Ptpn7	GO:0004721;GO:0004725;GO:0004725;GO:0004725;GO:0005737;GO:0005737;GO:0005829;GO:0005856;GO:0006470;GO:0006470;GO:0009898;GO:0016311;GO:0016787;GO:0016791;GO:0035335;GO:0006470;	K18019	protein tyrosine phosphatase, non-receptor type 7[Source:MGI Symbol;Acc:MGI:2156893]
MGP_C57BL6NJ_G0016921	2299	2364	83.5684	2676	75.6634	3546	70.9542	1729	78.5403	1653	75.8813	1993	86.1766	1	143910325	143921455	+	2299	Arl8a	GO:0000166;GO:0005525;GO:0005525;GO:0005525;GO:0005622;GO:0005737;GO:0005764;GO:0005765;GO:0005765;GO:0005765;GO:0005768;GO:0005774;GO:0007049;GO:0007059;GO:0007264;GO:0016020;GO:0016020;GO:0030496;GO:0031902;GO:0051233;GO:0051301;GO:0070062;	K07955	ADP-ribosylation factor-like 8A [Source:MGISymbol;Acc:MGI:1915974]
MGP_C57BL6NJ_G0016922	2269	0	0	0	0	0	0	0	0	0	0	0	0	1	143925326	143934609	-	2269	Gpr37l1	GO:0003085;GO:0003085;GO:0004871;GO:0004930;GO:0004930;GO:0005515;GO:0005886;GO:0005886;GO:0005886;GO:0007165;GO:0007186;GO:0007186;GO:0007193;GO:0008528;GO:0016020;GO:0016021;GO:0016021;GO:0021940;GO:0021940;GO:0036505;GO:0036505;GO:0042277;GO:0043235;GO:0043410;GO:0043410;GO:0043410;GO:0045665;GO:0045665;GO:0045879;GO:0045879;GO:0048712;GO:0048712;GO:1903206;GO:1903206;	K04244	G protein-coupled receptor 37-like 1 [Source:MGISymbol;Acc:MGI:1928503]
MGP_C57BL6NJ_G0016923	2217	1	0.0366579	0	0	0	0	0	0	0	0	0	0	1	144033474	144038455	-	2217	Elf3	GO:0000978;GO:0000978;GO:0000981;GO:0001077;GO:0001077;GO:0001824;GO:0001824;GO:0003677;GO:0003677;GO:0003677;GO:0003700;GO:0003700;GO:0003700;GO:0003713;GO:0003713;GO:0005634;GO:0005634;GO:0005634;GO:0005634;GO:0005654;GO:0005737;GO:0005794;GO:0005829;GO:0006351;GO:0006355;GO:0006355;GO:0006355;GO:0006355;GO:0006357;GO:0006366;GO:0006954;GO:0006954;GO:0007275;GO:0009653;GO:0009653;GO:0030154;GO:…	K09429	E74-like factor 3 [Source:MGISymbol;Acc:MGI:1101781]
MGP_C57BL6NJ_G0016924	6887	1452	17.1344	2664	25.1445	5668	37.8598	1293	19.6067	1332	20.4115	1360	19.6304	1	144042597	144067578	-	6887	Rnpep	GO:0004177;GO:0004177;GO:0004177;GO:0005507;GO:0005576;GO:0005576;GO:0005576;GO:0005615;GO:0005615;GO:0005794;GO:0005886;GO:0005886;GO:0005886;GO:0006508;GO:0006508;GO:0006508;GO:0006508;GO:0008233;GO:0008237;GO:0008237;GO:0008270;GO:0008270;GO:0008270;GO:0009897;GO:0016787;GO:0030141;GO:0030141;GO:0042277;GO:0042277;GO:0043005;GO:0043171;GO:0045776;GO:0045776;GO:0046872;GO:0050897;GO:0070006;GO:…	-	arginyl aminopeptidase (aminopeptidase B)[Source:MGI Symbol;Acc:MGI:2384902]
MGP_C57BL6NJ_G0016925	1094	468	34.7666	497	29.531	816	34.3124	210	20.0465	177	17.0748	229	20.8084	1	144085304	144099365	-	1094	Timm17a	GO:0005739;	K17795	translocase of inner mitochondrial membrane 17a[Source:MGI Symbol;Acc:MGI:1343131]
MGP_C57BL6NJ_G0016926	3948	436	8.97517	747	12.2994	0	0	42	1.11099	14	0.374241	7	0.176255	1	144109671	144158058	+	3948	Lmod1	GO:0003779;GO:0005523;GO:0006936;GO:0051694;	K22030	leiomodin 1 (smooth muscle) [Source:MGISymbol;Acc:MGI:2135671]
MGP_C57BL6NJ_G0016927	2418	73	2.45358	161	4.32821	27	0.513672	0	0	0	0	10	0.411116	1	144161052	144165232	-	2418	Shisa4	GO:0016020;GO:0016021;	-	shisa family member 4 [Source:MGISymbol;Acc:MGI:1924802]
MGP_C57BL6NJ_G0016928	8233	868	8.56831	1165	9.19828	1943	10.8566	668	8.47334	679	8.70387	602	7.26874	1	144172307	144222611	-	8233	Ipo9	GO:0005634;GO:0006886;GO:0008536;GO:0015031;	K20224	importin 9 [Source:MGI Symbol;Acc:MGI:1918944]"
MGP_C57BL6NJ_G0016929	17290	2058	9.67351	3114	11.7075	1118	2.97458	1561	9.42854	1823	11.1274	1586	9.11862	1	144226692	144406612	-	17290	Nav1	GO:0001578;GO:0001578;GO:0001578;GO:0001764;GO:0001764;GO:0001764;GO:0005737;GO:0005856;GO:0005874;GO:0007275;GO:0007399;GO:0007399;GO:0015630;GO:0015630;GO:0015630;GO:0022008;GO:0030154;GO:0043194;GO:0043194;GO:0043194;	K16776	neuron navigator 1 [Source:MGISymbol;Acc:MGI:2183683]
MGP_C57BL6NJ_G0016930	1952	2178	90.68	4213	140.298	3254	76.686	965	51.6278	690	37.3053	1036	52.7595	1	144529821	144564524	+	1952	Csrp1	GO:0003723;GO:0005515;GO:0005634;GO:0005634;GO:0005654;GO:0005925;GO:0015629;GO:0030036;GO:0046872;GO:0070062;GO:0070527;	K09377	cysteine and glycine-rich protein 1 [Source:MGISymbol;Acc:MGI:88549]
MGP_C57BL6NJ_G0016931	1559	251	13.0846	383	15.9695	1980	58.4248	57	3.81826	48	3.24935	62	3.95336	1	144578363	144581380	+	1559	Phlda3	GO:0005546;GO:0005546;GO:0005547;GO:0005547;GO:0005737;GO:0005886;GO:0005886;GO:0006915;GO:0010314;GO:0010314;GO:0016020;GO:0032266;GO:0032266;GO:0042771;GO:0042771;GO:0043065;GO:0043065;GO:0043325;GO:0043325;GO:0051898;GO:0051898;GO:0070062;GO:0080025;GO:0080025;	-	pleckstrin homology like domain, family A, member 3[Source:MGI Symbol;Acc:MGI:1351485]
MGP_C57BL6NJ_G0016932	3600	0	0	0	0	0	0	0	0	0	0	0	0	1	144591652	144624948	+	3600	Tnni1	GO:0014883;GO:0055010;	-	troponin I, skeletal, slow 1 [Source:MGISymbol;Acc:MGI:105073]
MGP_C57BL6NJ_G0016933	3400	1	0.0239031	6	0.114713	30	0.405901	1	0.0307155	1	0.03104	3	0.0877129	1	144632669	144647217	+	3400	Lad1	GO:0005198;GO:0005198;GO:0005576;GO:0005578;GO:0005604;GO:0015629;GO:0045296;GO:0070062;	-	ladinin [Source:MGI Symbol;Acc:MGI:109343]"
MGP_C57BL6NJ_G0016934	7751	14	0.146792	12	0.100638	0	0	0	0	0	0	0	0	1	144650228	144666073	+	7751	Tnnt2	GO:0003009;GO:0003779;GO:0003779;GO:0005200;GO:0005509;GO:0005523;GO:0005523;GO:0005737;GO:0005861;GO:0005861;GO:0005861;GO:0005865;GO:0005865;GO:0006936;GO:0006936;GO:0006937;GO:0006937;GO:0007507;GO:0008016;GO:0009617;GO:0016887;GO:0030016;GO:0030017;GO:0030049;GO:0030049;GO:0030172;GO:0030172;GO:0030172;GO:0030674;GO:0031013;GO:0031013;GO:0031013;GO:0032780;GO:0032780;GO:0032781;GO:0032781;GO:…	K12045	troponin T2, cardiac [Source:MGISymbol;Acc:MGI:104597]
MGP_C57BL6NJ_G0016935	5024	0	0	0	0	9	0.0824083	0	0	0	0	0	0	1	144685187	144734195	-	5024	Pkp1	GO:0005515;GO:0005521;GO:0005634;GO:0005634;GO:0005634;GO:0005634;GO:0005654;GO:0005737;GO:0005886;GO:0005886;GO:0005911;GO:0005913;GO:0007043;GO:0007155;GO:0007155;GO:0010628;GO:0030054;GO:0030057;GO:0030057;GO:0030057;GO:0030057;GO:0043231;GO:0045110;GO:0045110;GO:0045296;GO:0070062;GO:0098609;GO:0098609;GO:1902373;GO:1990124;	K10387	plakophilin 1 [Source:MGI Symbol;Acc:MGI:1328359]"
MGP_C57BL6NJ_G0016936	8996	0	0	0	0	0	0	0	0	5	0.0586572	0	0	1	144774739	144828266	-	8996	Igfn1	GO:0003674;GO:0005634;GO:0005737;GO:0008150;GO:0008150;GO:0030018;GO:0005634;GO:0030018;	-	immunoglobulin-like and fibronectin type III domaincontaining 1 [Source:MGI Symbol;Acc:MGI:3045352]
MGP_C57BL6NJ_G0016937	2726	97	2.89187	116	2.76612	251	4.23571	44	1.68563	0	0	16	0.583465	1	144830074	144859740	+	2726	Tmem9	GO:0003674;GO:0005764;GO:0005764;GO:0005765;GO:0005768;GO:0005770;GO:0005770;GO:0006810;GO:0008150;GO:0016020;GO:0016021;GO:0016021;GO:0031902;	-	transmembrane protein 9 [Source:MGISymbol;Acc:MGI:1913491]
MGP_C57BL6NJ_G0016938	567	0	0	0	0	0	0	0	0	0	0	0	0	1	144876688	144877254	+	567	Ascl5	GO:0000977;GO:0003677;GO:0003700;GO:0006357;GO:0006357;GO:0046983;GO:0090575;	K09067	achaete-scute family bHLH transcription factor 5[Source:MGI Symbol;Acc:MGI:2685043]
MGP_C57BL6NJ_G0016939	6550	0	0	0	0	0	0	0	0	0	0	0	0	1	144878624	144948947	+	6550	Cacna1s	GO:0005216;GO:0005244;GO:0005245;GO:0005262;GO:0005891;GO:0006811;GO:0006816;GO:0016020;GO:0016020;GO:0016021;GO:0034765;GO:0055085;GO:0070588;GO:0070588;	K04857	calcium channel, voltage-dependent, L type, alpha1S subunit [Source:MGI Symbol;Acc:MGI:88294]
MGP_C57BL6NJ_G0016940	12184	1020	6.80368	1680	8.9631	1248	4.71197	829	7.1056	948	8.21144	886	7.22878	1	144960556	145012490	+	12184	Kif21b	GO:0000166;GO:0003774;GO:0003777;GO:0005524;GO:0005524;GO:0007018;GO:0008017;	K10395	kinesin family member 21B [Source:MGISymbol;Acc:MGI:109234]
MGP_C57BL6NJ_G0016941	3251	0	0	0	0	0	0	0	0	0	0	0	0	1	145015956	145045789	-	3251	Mroh3	-	-	maestro heat-like repeat family member 3[Source:MGI Symbol;Acc:MGI:1923672]
MGP_C57BL6NJ_G0016942	4977	21	0.342914	0	0	0	0	0	0	0	0	0	0	1	145048769	145069487	-	4977	5730559C18Rik	GO:0045087;	-	RIKEN cDNA 5730559C18 gene [Source:MGISymbol;Acc:MGI:1921579]
MGP_C57BL6NJ_G0016943	1077	0	0	0	0	0	0	0	0	0	0	0	0	1	145094922	145095998	-	1077	Gpr25	GO:0003674;GO:0004871;GO:0004930;GO:0004930;GO:0005575;GO:0007165;GO:0007186;GO:0007186;GO:0008150;GO:0016020;GO:0016021;GO:0016021;	K08405	G protein-coupled receptor 25 [Source:MGISymbol;Acc:MGI:2686146]
MGP_C57BL6NJ_G0016944	9195	2200	19.4448	2711	19.1653	809	4.04739	1055	11.9822	1276	14.6453	1011	10.93	1	145103248	145186630	-	9195	Camsap2	GO:0000226;GO:0000226;GO:0000226;GO:0005515;GO:0005516;GO:0005737;GO:0005794;GO:0005794;GO:0005813;GO:0005829;GO:0005856;GO:0005874;GO:0007026;GO:0008017;GO:0030507;GO:0031113;GO:0031113;GO:0031122;GO:0031175;GO:0033043;GO:0033043;GO:0036449;GO:0036449;GO:0050773;GO:0050773;GO:0051011;GO:0051011;GO:0051011;GO:0061564;GO:0061564;GO:1903358;GO:1903358;GO:1990752;	K17493	calmodulin regulated spectrin-associated proteinfamily, member 2 [Source:MGI Symbol;Acc:MGI:1922434]
MGP_C57BL6NJ_G0016945	2953	95	2.61453	102	2.24531	122	1.90053	68	2.40482	62	2.21579	113	3.80396	1	145257754	145283235	+	2953	Ddx59	-	K19466	DEAD (Asp-Glu-Ala-Asp) box polypeptide 59[Source:MGI Symbol;Acc:MGI:1915247]
MGP_C57BL6NJ_G0016946	10358	149	1.16908	210	1.3179	4	0.0177649	133	1.34095	121	1.23285	131	1.25723	1	145309006	145377534	+	10358	Kif14	GO:0005524;GO:0008017;GO:0008574;GO:0015631;GO:0016887;GO:0021685;GO:0021693;GO:0021695;GO:0021766;GO:0021772;GO:0021846;GO:0021987;GO:0031641;GO:0043523;GO:0043524;GO:0051301;GO:1903429;	K17915	kinesin family member 14 [Source:MGISymbol;Acc:MGI:1098226]
MGP_C57BL6NJ_G0016947	4937	682	11.2268	784	10.3227	178	1.65857	404	8.54584	448	9.5767	474	9.54412	1	145482829	145487981	+	4937	Zfp281	GO:0000122;GO:0000978;GO:0000980;GO:0000980;GO:0001047;GO:0001047;GO:0001078;GO:0003676;GO:0003677;GO:0003700;GO:0003700;GO:0003700;GO:0003700;GO:0003714;GO:0003714;GO:0005515;GO:0005515;GO:0005634;GO:0005634;GO:0005654;GO:0005654;GO:0006351;GO:0006355;GO:0010172;GO:0010172;GO:0010629;GO:0010629;GO:0030154;GO:0043565;GO:0043565;GO:0044212;GO:0044212;GO:0044212;GO:0045892;GO:0045892;GO:0045893;GO:…	-	zinc finger protein 281 [Source:MGISymbol;Acc:MGI:3029290]
MGP_C57BL6NJ_G0016948	5899	0	0	0	0	0	0	2	0.0354069	1	0.0178905	0	0	1	145743095	145872907	-	5899	Nr5a2	GO:0000976;GO:0000978;GO:0000978;GO:0000980;GO:0000980;GO:0001077;GO:0001077;GO:0003677;GO:0003677;GO:0003677;GO:0003677;GO:0003682;GO:0003682;GO:0003682;GO:0003690;GO:0003700;GO:0003700;GO:0003700;GO:0003707;GO:0004879;GO:0004879;GO:0005543;GO:0005634;GO:0005634;GO:0005634;GO:0005634;GO:0005737;GO:0005829;GO:0006351;GO:0006355;GO:0006355;GO:0006355;GO:0006366;GO:0008206;GO:0008206;GO:0008270;GO:…	K08027	nuclear receptor subfamily 5, group A, member 2[Source:MGI Symbol;Acc:MGI:1346834]
MGP_C57BL6NJ_G0016949	18294	11562	51.3639	11633	41.3354	8104	20.3783	16519	94.3	22042	127.158	17765	96.5334	1	147068621	147200591	-	18294	Ptprc	-	-	protein tyrosine phosphatase, receptor type, C[Source:MGI Symbol;Acc:MGI:97810]
MGP_C57BL6NJ_G0016950	1887	0	0	0	0	0	0	0	0	0	0	0	0	1	147302977	147318701	+	1887	Atp6v1g3	GO:0005829;GO:0005829;GO:0005829;GO:0005886;GO:0005886;GO:0005886;GO:0006810;GO:0006811;GO:0008553;GO:0008553;GO:0015991;GO:0015992;GO:0015992;GO:0016020;GO:0016471;GO:0016820;GO:0042626;GO:0051117;GO:1902600;	K02152	ATPase, H+ transporting, lysosomal V1 subunit G3[Source:MGI Symbol;Acc:MGI:2450548]
MGP_C57BL6NJ_G0016951	2968	1132	30.9967	1155	25.2963	607	9.40812	844	29.6972	801	28.4819	813	27.23	1	147521618	147662434	-	2968	Nek7	GO:0000166;GO:0000922;GO:0004672;GO:0004674;GO:0004674;GO:0005515;GO:0005524;GO:0005524;GO:0005634;GO:0005654;GO:0005737;GO:0005815;GO:0005856;GO:0006468;GO:0006468;GO:0006468;GO:0016301;GO:0016310;GO:0016740;GO:0032212;GO:0046872;GO:0051973;GO:1904355;	K20876	NIMA (never in mitosis gene a)-related expressedkinase 7 [Source:MGI Symbol;Acc:MGI:1890645]
MGP_C57BL6NJ_G0016952	9486	0	0	9	0.0616734	0	0	0	0	0	0	0	0	1	147877261	147902128	-	9486	Lhx9	GO:0003677;GO:0003677;GO:0003714;GO:0005515;GO:0005634;GO:0006355;GO:0008045;GO:0008283;GO:0008584;GO:0008585;GO:0035262;GO:0043565;GO:0045892;GO:0046872;GO:0097380;GO:0008283;GO:0008584;GO:0008585;GO:0035262;	-	LIM homeobox protein 9 [Source:MGISymbol;Acc:MGI:1316721]
MGP_C57BL6NJ_G0016953	1750	2	0.0928807	38	1.41151	5	0.131435	3	0.179027	25	1.50766	25	1.42011	1	147904721	147909590	-	1750	2310009B15Rik	GO:0003674;GO:0005575;GO:0008150;	-	RIKEN cDNA 2310009B15 gene [Source:MGISymbol;Acc:MGI:1916799]
MGP_C57BL6NJ_G0016954	18987	1742	7.45633	2105	7.20667	948	2.29684	1598	8.78935	2191	12.1783	1578	8.26174	1	148018825	148257734	+	18987	Dennd1b	GO:0005085;GO:0005737;GO:0005829;GO:0005829;GO:0005829;GO:0006810;GO:0006897;GO:0015031;GO:0016607;GO:0016607;GO:0017112;GO:0017112;GO:0017112;GO:0017137;GO:0017137;GO:0030136;GO:0031410;GO:0032456;GO:0032456;GO:0035745;GO:0035745;GO:0035745;GO:0043231;GO:0043547;GO:0050776;GO:0050852;GO:0050852;GO:0050852;GO:1901981;GO:0017112;GO:0017137;GO:0032456;GO:0035745;GO:0043547;GO:0050776;GO:0050852;	-	DENN/MADD domain containing 1B [Source:MGISymbol;Acc:MGI:2447812]
MGP_C57BL6NJ_G0016955	14399	0	0	0	0	0	0	0	0	0	0	0	0	1	148277492	148469260	-	14399	-	-	K16681	-
MGP_C57BL6NJ_G0016956	4536	642	11.5026	611	8.75602	46	0.466512	343	7.89692	390	9.07387	282	6.18012	1	148518676	148545571	+	4536	Zbtb41	GO:0003676;GO:0003677;GO:0005634;GO:0005634;GO:0006351;GO:0006355;GO:0008150;GO:0046872;	-	zinc finger and BTB domain containing 41[Source:MGI Symbol;Acc:MGI:2444487]
MGP_C57BL6NJ_G0016957	11590	439	3.07833	425	2.38366	9	0.0357221	321	2.8924	275	2.50409	337	2.89046	1	148551160	148591495	+	11590	Aspm	GO:0000922;GO:0001764;GO:0002052;GO:0005516;GO:0005516;GO:0005634;GO:0005634;GO:0005737;GO:0005737;GO:0005813;GO:0005819;GO:0005856;GO:0005874;GO:0005874;GO:0007049;GO:0007051;GO:0007051;GO:0007283;GO:0007420;GO:0008584;GO:0016324;GO:0019901;GO:0021873;GO:0021987;GO:0030496;GO:0036449;GO:0045665;GO:0045769;GO:0048477;GO:0048589;GO:0051301;GO:0051445;GO:0051653;GO:0051661;GO:0072687;GO:0090263;GO:…	-	asp (abnormal spindle)-like, microcephalyassociated (Drosophila) [Source:MGISymbol;Acc:MGI:1334448]
MGP_C57BL6NJ_G0016958	2532	0	0	0	0	0	0	0	0	0	0	0	0	1	148599025	148622241	+	2532	F13b	GO:0004857;GO:0005515;GO:0005575;GO:0005576;GO:0007596;GO:0007596;GO:0007596;GO:0007599;GO:0043086;GO:0072378;GO:0072378;GO:1903363;GO:1903363;	K03906	coagulation factor XIII, beta subunit [Source:MGISymbol;Acc:MGI:88379]
MGP_C57BL6NJ_G0016959	1931	0	0	0	0	0	0	0	0	0	0	0	0	1	148639783	148663032	-	1931	Cfhr1	GO:0032091;GO:0032991;GO:0042803;GO:0043234;GO:0045919;GO:0046982;GO:0070062;GO:0072562;	-	complement factor H-related 1 [Source:MGISymbol;Acc:MGI:2138169]
MGP_C57BL6NJ_G0016960	3010	0	0	0	0	0	0	0	0	0	0	6	0.198155	1	148805757	148913244	-	3010	Gm4788	GO:0003674;GO:0005575;GO:0008150;	-	predicted gene 4788 [Source:MGISymbol;Acc:MGI:3646434]
MGP_C57BL6NJ_G0016961	1750	23	1.06813	73	2.71159	51	1.34063	55	3.28217	85	5.12604	93	5.28282	1	148939750	149055332	-	1750	Cfhr2	-	-	complement factor H-related 2 [Source:MGISymbol;Acc:MGI:3611575]
MGP_C57BL6NJ_G0016962	7247	237	2.65781	357	3.2022	216	1.37111	401	5.7786	389	5.6649	450	6.1727	1	149273989	149372259	-	7247	-	-	-	-
MGP_C57BL6NJ_G0016963	6895	0	0	0	0	0	0	0	0	0	0	0	0	1	149448746	149849173	+	6895	Kcnt2	GO:0005228;GO:0005249;GO:0005249;GO:0005267;GO:0005886;GO:0005886;GO:0006813;GO:0006813;GO:0008076;GO:0015269;GO:0015271;GO:0016020;GO:0016020;GO:0016021;GO:0016021;GO:0034220;GO:0034765;GO:0042391;GO:0071805;	K04947	potassium channel, subfamily T, member 2[Source:MGI Symbol;Acc:MGI:3036273]
MGP_C57BL6NJ_G0016964	17538	2222	10.2967	1996	7.39808	355	0.931165	1346	8.01496	1462	8.79768	1140	6.46168	1	152937639	153049113	-	17538	Cdc73	GO:0000122;GO:0000122;GO:0000122;GO:0000784;GO:0000993;GO:0000993;GO:0000993;GO:0001076;GO:0001558;GO:0001558;GO:0001711;GO:0001711;GO:0005515;GO:0005515;GO:0005634;GO:0005634;GO:0005829;GO:0006351;GO:0006357;GO:0006357;GO:0006368;GO:0006378;GO:0006378;GO:0007049;GO:0008285;GO:0008285;GO:0010390;GO:0016055;GO:0016570;GO:0016570;GO:0016593;GO:0016593;GO:0016593;GO:0016593;GO:0019827;GO:0019827;GO:…	K15175	cell division cycle 73, Paf1/RNA polymerase IIcomplex component [Source:MGI Symbol;Acc:MGI:2384876]
MGP_C57BL6NJ_G0016965	9288	8	0.0700005	7	0.0489908	4	0.0198114	4	0.0449753	3	0.0340879	18	0.192651	1	152984641	152999818	+	9288	B3galt2	GO:0000139;GO:0005575;GO:0005783;GO:0005794;GO:0005794;GO:0006486;GO:0006486;GO:0006486;GO:0006487;GO:0006682;GO:0008376;GO:0008378;GO:0008499;GO:0008499;GO:0008499;GO:0009312;GO:0009312;GO:0009312;GO:0016020;GO:0016020;GO:0016021;GO:0016740;GO:0016757;GO:0047275;	K07820	UDP-Gal:betaGlcNAc beta 1,3-galactosyltransferase,polypeptide 2 [Source:MGI Symbol;Acc:MGI:1349461]
MGP_C57BL6NJ_G0016966	8424	482	4.6501	390	3.00944	889	4.85469	239	2.96289	321	4.02149	203	2.39551	1	153064329	153098393	+	8424	Glrx2	GO:0005739;GO:0015035;	K03676	glutaredoxin 2 (thioltransferase) [Source:MGISymbol;Acc:MGI:1916617]
MGP_C57BL6NJ_G0016967	9533	557	4.74853	786	5.35959	196	0.945812	247	2.70585	250	2.76765	212	2.21069	1	153099507	153125733	-	9533	Trove2	GO:0002520;GO:0002520;GO:0003723;GO:0003723;GO:0003723;GO:0003723;GO:0003723;GO:0005634;GO:0005634;GO:0005654;GO:0005737;GO:0005737;GO:0005737;GO:0005829;GO:0007224;GO:0007224;GO:0009411;GO:0009411;GO:0030030;GO:0030529;GO:0030529;GO:0030529;GO:0030620;GO:0030620;GO:0034336;GO:0046872;GO:0060271;GO:0060271;GO:1990904;GO:1990904;GO:1990904;GO:1990904;	K11089	TROVE domain family, member 2 [Source:MGISymbol;Acc:MGI:106652]
MGP_C57BL6NJ_G0016968	2838	826	23.6538	823	18.8506	103	1.66956	712	26.2002	660	24.5433	685	23.9938	1	153125937	153161565	+	2838	Uchl5	GO:0000502;GO:0003723;GO:0004843;GO:0004843;GO:0004843;GO:0004843;GO:0004843;GO:0004866;GO:0005622;GO:0005634;GO:0005634;GO:0005654;GO:0005737;GO:0005737;GO:0005739;GO:0005829;GO:0005829;GO:0005829;GO:0006281;GO:0006310;GO:0006351;GO:0006355;GO:0006508;GO:0006511;GO:0006974;GO:0008233;GO:0008234;GO:0010951;GO:0016579;GO:0016579;GO:0016579;GO:0016579;GO:0016787;GO:0021670;GO:0021670;GO:0030901;GO:…	K05610	ubiquitin carboxyl-terminal esterase L5 [Source:MGISymbol;Acc:MGI:1914848]
MGP_C57BL6NJ_G0016969	3627	1154	25.8578	1081	19.3739	274	3.47521	1307	37.6326	1407	40.94	1348	36.9456	1	153351420	153356243	-	3627	Rgs2	GO:0001965;GO:0005096;GO:0005096;GO:0005096;GO:0005515;GO:0005634;GO:0005634;GO:0005730;GO:0005737;GO:0005737;GO:0005829;GO:0005829;GO:0005829;GO:0005886;GO:0005886;GO:0005886;GO:0005886;GO:0006417;GO:0007049;GO:0007186;GO:0007283;GO:0007283;GO:0008277;GO:0008277;GO:0009898;GO:0009898;GO:0009898;GO:0009968;GO:0010519;GO:0010519;GO:0010614;GO:0010614;GO:0010976;GO:0016020;GO:0017148;GO:0043005;GO:…	K18154	regulator of G-protein signaling 2 [Source:MGISymbol;Acc:MGI:1098271]
MGP_C57BL6NJ_G0016970	1655	0	0	0	0	0	0	0	0	0	0	0	0	1	153500694	153546093	-	1655	Rgs13	GO:0005096;GO:0005515;GO:0005634;GO:0005829;GO:0005886;GO:0007186;GO:0009968;GO:0043547;GO:0045744;GO:0005634;GO:0005829;GO:0005886;GO:0007186;GO:0045744;	K16449	regulator of G-protein signaling 13 [Source:MGISymbol;Acc:MGI:2180585]
MGP_C57BL6NJ_G0016971	6946	1183	13.8415	1540	14.412	416	2.7551	1406	21.1391	1535	23.3225	1182	16.9162	1	153615504	153622449	-	6946	Rgs1	GO:0001965;GO:0005096;GO:0005096;GO:0005096;GO:0005737;GO:0005737;GO:0005829;GO:0005829;GO:0005886;GO:0005886;GO:0007165;GO:0007165;GO:0007186;GO:0007186;GO:0008277;GO:0009617;GO:0009617;GO:0009968;GO:0016020;GO:0031234;GO:0031234;GO:0043547;GO:0043547;GO:0043547;GO:0061737;GO:0061737;	K16449	regulator of G-protein signaling 1 [Source:MGISymbol;Acc:MGI:1354694]
MGP_C57BL6NJ_G0016972	3941	0	0	0	0	0	0	0	0	0	0	0	0	1	153898553	153957368	-	3941	Rgs21	-	K16449	regulator of G-protein signalling 21 [Source:MGISymbol;Acc:MGI:3645243]
MGP_C57BL6NJ_G0016973	2031	122	4.88184	96	3.07256	21	0.47565	164	8.43277	208	10.8082	176	8.61437	1	154146418	154180022	-	2031	Rgs18	GO:0005096;GO:0005096;GO:0005096;GO:0005737;GO:0005737;GO:0005737;GO:0005886;GO:0007186;GO:0007186;GO:0007186;GO:0008277;GO:0008277;GO:0009968;GO:0043547;	K16449	regulator of G-protein signaling 18 [Source:MGISymbol;Acc:MGI:1927498]
MGP_C57BL6NJ_G0016974	6994	45	0.522902	101	0.938717	0	0	32	0.477816	0	0	0	0	1	156050322	156533337	+	6994	Brinp3	GO:0003674;GO:0005576;GO:0005739;GO:0005783;GO:0005783;GO:0007049;GO:0007050;GO:0016020;GO:0016021;GO:0030425;GO:0030425;GO:0043025;GO:0043025;GO:0045666;GO:0045666;GO:0045666;GO:0045666;GO:0045786;GO:0045930;GO:0045930;GO:0045930;GO:0045930;GO:0071300;GO:0071300;GO:0071300;	-	bone morphogenetic protein/retinoic acid inducibleneural specific 3 [Source:MGI Symbol;Acc:MGI:2443035]
MGP_C57BL6NJ_G0016975	6378	479	6.10358	595	6.06417	603	4.34922	378	6.18933	512	8.47201	314	4.89402	1	159802116	159936425	-	6378	Pla2g4a	GO:0001542;GO:0004620;GO:0004622;GO:0004623;GO:0004623;GO:0004623;GO:0004623;GO:0005509;GO:0005509;GO:0005509;GO:0005544;GO:0005544;GO:0005544;GO:0005634;GO:0005634;GO:0005737;GO:0005737;GO:0005737;GO:0005783;GO:0005783;GO:0005783;GO:0005794;GO:0005794;GO:0005794;GO:0005811;GO:0005829;GO:0005829;GO:0005829;GO:0005829;GO:0006629;GO:0008152;GO:0008284;GO:0009395;GO:0010033;GO:0016042;GO:0016787;GO:…	K16342	phospholipase A2, group IVA (cytosolic, calcium-dependent) [Source:MGI Symbol;Acc:MGI:1195256]
MGP_C57BL6NJ_G0016976	4580	2416	42.8711	2724	38.6617	180	1.80795	249	5.67767	53	1.22127	47	1.02012	1	160079479	160089284	+	4580	Ptgs2	GO:0001516;GO:0001516;GO:0001516;GO:0001516;GO:0001525;GO:0004601;GO:0004601;GO:0004666;GO:0004666;GO:0004666;GO:0004666;GO:0005515;GO:0005737;GO:0005737;GO:0005737;GO:0005783;GO:0005783;GO:0005789;GO:0005901;GO:0006629;GO:0006631;GO:0006633;GO:0006693;GO:0006954;GO:0006954;GO:0006979;GO:0007566;GO:0007566;GO:0007612;GO:0007613;GO:0008217;GO:0008217;GO:0008217;GO:0008284;GO:0008285;GO:0010575;GO:…	K11987	prostaglandin-endoperoxide synthase 2 [Source:MGISymbol;Acc:MGI:97798]
MGP_C57BL6NJ_G0016977	3350	0	0	0	0	0	0	0	0	0	0	0	0	1	160339589	160354350	+	3350	Pdc	GO:0001750;GO:0001750;GO:0001917;GO:0005634;GO:0005737;GO:0005829;GO:0005829;GO:0005929;GO:0007601;GO:0008479;GO:0008616;GO:0042995;GO:0050896;GO:0001750;	K08327	phosducin [Source:MGI Symbol;Acc:MGI:98090]"
MGP_C57BL6NJ_G0016978	4097	876	17.3769	908	14.4065	427	4.79446	628	16.0077	712	18.3407	579	14.0486	1	160382255	160415418	-	4097	BC003331	GO:0003674;GO:0005575;GO:0008104;GO:0008150;GO:0016020;GO:0016021;	-	cDNA sequence BC003331 [Source:MGISymbol;Acc:MGI:2385108]
MGP_C57BL6NJ_G0016979	10496	11128	86.1642	10575	65.4931	1292	5.66261	7466	74.2849	8266	83.1137	7258	68.7407	1	160415176	160475323	+	10496	Tpr	GO:0000122;GO:0000122;GO:0000189;GO:0000189;GO:0000775;GO:0000776;GO:0003682;GO:0003682;GO:0003723;GO:0003729;GO:0003729;GO:0005487;GO:0005487;GO:0005487;GO:0005515;GO:0005634;GO:0005634;GO:0005635;GO:0005635;GO:0005635;GO:0005643;GO:0005643;GO:0005643;GO:0005643;GO:0005694;GO:0005737;GO:0005737;GO:0005819;GO:0005856;GO:0005868;GO:0005868;GO:0006404;GO:0006404;GO:0006405;GO:0006405;GO:0006606;GO:…	K09291	translocated promoter region, nuclear basketprotein [Source:MGI Symbol;Acc:MGI:1922066]
MGP_C57BL6NJ_G0016980	4280	679	12.8932	553	8.39886	0	0	289	7.05165	124	3.05759	199	4.622	1	160474800	160491553	-	4280	Prg4	GO:0005044;GO:0006898;GO:0006955;GO:0030247;	-	proteoglycan 4 (megakaryocyte stimulating factor,articular superficial zone protein) [Source:MGISymbol;Acc:MGI:1891344]
MGP_C57BL6NJ_G0016981	21191	3	0.0115054	14	0.0429453	0	0	0	0	0	0	1	0.00469104	1	160595561	161072786	-	21191	Hmcn1	GO:0003674;GO:0005201;GO:0005509;GO:0005576;GO:0005576;GO:0005576;GO:0005578;GO:0005604;GO:0005604;GO:0005604;GO:0005737;GO:0005913;GO:0005938;GO:0005938;GO:0007049;GO:0007156;GO:0007157;GO:0008150;GO:0009617;GO:0009617;GO:0030054;GO:0030054;GO:0030054;GO:0032154;GO:0038023;GO:0042803;GO:0050839;GO:0051301;GO:0062023;GO:0070062;	K17341	hemicentin 1 [Source:MGI Symbol;Acc:MGI:2685047]"
MGP_C57BL6NJ_G0016982	5435	3754	56.1343	4586	54.8496	3462	29.3026	1123	21.5783	1147	22.2723	883	16.1504	1	161467203	161487148	+	5435	Ivns1abp	GO:0005515;GO:0005634;GO:0005634;GO:0005634;GO:0005737;GO:0005829;GO:0005856;GO:0008380;GO:0009615;GO:0015629;GO:0031397;GO:0031397;GO:2001243;GO:2001243;	K15046	influenza virus NS1A binding protein [Source:MGISymbol;Acc:MGI:2152389]
MGP_C57BL6NJ_G0016983	12778	388	2.46776	561	2.8539	112	0.403212	310	2.53358	370	3.0559	279	2.17051	1	161490425	161555565	-	12778	Swt1	GO:0003674;GO:0005634;GO:0006351;	-	SWT1 RNA endoribonuclease homolog (S. cerevisiae)[Source:MGI Symbol;Acc:MGI:1914125]
MGP_C57BL6NJ_G0016984	8184	784	7.78545	932	7.40268	713	4.00776	567	7.23526	629	8.11121	608	7.38514	1	161555652	161591958	+	8184	Trmt1l	-	-	tRNA methyltransferase 1 like [Source:MGISymbol;Acc:MGI:1916185]
MGP_C57BL6NJ_G0016985	4127	536	10.5551	662	10.4271	459	5.11631	494	12.5005	516	13.1952	423	10.1889	1	161591801	161638429	-	4127	Rnf2	GO:0000122;GO:0000122;GO:0000151;GO:0000151;GO:0000278;GO:0000791;GO:0000792;GO:0001702;GO:0001739;GO:0003682;GO:0004842;GO:0004842;GO:0005515;GO:0005515;GO:0005515;GO:0005634;GO:0005634;GO:0005654;GO:0005694;GO:0006351;GO:0006355;GO:0007281;GO:0008270;GO:0008270;GO:0009948;GO:0016567;GO:0016574;GO:0016604;GO:0016740;GO:0031519;GO:0031519;GO:0035102;GO:0035518;GO:0036353;GO:0043433;GO:0046872;GO:…	-	ring finger protein 2 [Source:MGISymbol;Acc:MGI:1101759]
MGP_C57BL6NJ_G0016986	7380	1089	11.9924	1493	13.1505	1478	9.2129	644	9.1131	629	8.99487	672	9.05178	1	161720327	161884914	+	7380	Fam129a	GO:0001933;GO:0001934;GO:0003674;GO:0003674;GO:0005737;GO:0005737;GO:0005829;GO:0005886;GO:0006417;GO:0016020;GO:0016020;GO:0034976;GO:0045727;GO:0070062;GO:0001933;GO:0001934;GO:0034976;GO:0045727;	-	family with sequence similarity 129, member A[Source:MGI Symbol;Acc:MGI:2137237]
MGP_C57BL6NJ_G0016987	6381	1778	22.6452	2226	22.6765	748	5.39251	1018	16.6608	916	15.1498	963	15.0023	1	161919689	161986168	+	6381	Edem3	GO:0003824;GO:0004571;GO:0004571;GO:0004571;GO:0004571;GO:0005509;GO:0005783;GO:0005788;GO:0005788;GO:0005788;GO:0006486;GO:0006491;GO:0006516;GO:0006516;GO:0006986;GO:0008152;GO:0016020;GO:0016787;GO:0016798;GO:0030968;GO:0043161;GO:0043161;GO:0046872;GO:1904382;GO:1904382;GO:1904382;GO:1904382;	K10086	ER degradation enhancer, mannosidase alpha-like 3[Source:MGI Symbol;Acc:MGI:1914217]
MGP_C57BL6NJ_G0016988	11738	748	5.17894	718	3.97621	314	1.23059	543	4.83106	510	4.5854	361	3.05727	1	162018792	162277298	-	11738	1700025G04Rik	GO:0003674;GO:0005575;GO:0008150;	-	RIKEN cDNA 1700025G04 gene [Source:MGISymbol;Acc:MGI:1916649]
MGP_C57BL6NJ_G0016989	4195	259	5.01766	299	4.63317	194	2.12739	207	5.15317	165	4.151	178	4.21802	1	162571212	162588937	-	4195	Tsen15	GO:0000213;GO:0003676;GO:0004518;GO:0006388;GO:0090305;GO:0090501;GO:0090502;	K15324	tRNA splicing endonuclease subunit 15 [Source:MGISymbol;Acc:MGI:1913887]
MGP_C57BL6NJ_G0016990	4245	0	0	0	0	0	0	2	0.0492027	0	0	5	0.117088	1	162603259	162717879	+	4245	Colgalt2	GO:0003674;GO:0005575;GO:0005783;GO:0005788;GO:0008150;GO:0016740;GO:0016757;GO:0050211;GO:0050211;	K11703	collagen beta(1-O)galactosyltransferase 2[Source:MGI Symbol;Acc:MGI:2138232]
MGP_C57BL6NJ_G0016991	6907	1313	15.4493	1826	17.185	5621	37.4371	2196	33.2032	2228	34.0429	2519	36.2543	1	162723948	162989688	-	6907	Rgl1	GO:0005085;GO:0005085;GO:0005622;GO:0007165;GO:0007264;GO:0008321;GO:0065009;	K17635	ral guanine nucleotide dissociation stimulator,-like 1 [Source:MGI Symbol;Acc:MGI:107484]
MGP_C57BL6NJ_G0016992	1566	0	0	0	0	0	0	0	0	0	0	0	0	1	162973957	162980883	+	1566	Apobec4	GO:0003674;GO:0005575;GO:0006397;GO:0008150;GO:0008270;GO:0016787;GO:0016814;GO:0046872;	K18773	apolipoprotein B mRNA editing enzyme, catalyticpolypeptide-like 4 (putative) [Source:MGISymbol;Acc:MGI:1918531]
MGP_C57BL6NJ_G0016993	2276	6693	238.991	7448	212.719	4928	99.604	5165	236.992	4771	221.227	5740	250.704	1	162989879	162999752	+	2276	Arpc5	GO:0003779;GO:0005200;GO:0005737;GO:0005737;GO:0005768;GO:0005856;GO:0005885;GO:0005885;GO:0005885;GO:0005925;GO:0014909;GO:0015629;GO:0016477;GO:0016477;GO:0030011;GO:0030027;GO:0030027;GO:0030426;GO:0030833;GO:0034314;GO:0034314;GO:0034314;GO:0042995;GO:0043005;GO:0051015;GO:0051015;GO:0051639;GO:0061842;GO:0070062;GO:0097581;	K05754	actin related protein 2/3 complex, subunit 5[Source:MGI Symbol;Acc:MGI:1915021]
MGP_C57BL6NJ_G0016994	8484	2222	21.2852	4000	30.6477	12806	69.437	2340	28.8039	2400	29.8546	2527	29.6091	1	163024313	163061974	+	8484	Ncf2	GO:0001669;GO:0001669;GO:0005515;GO:0005515;GO:0005730;GO:0005737;GO:0005737;GO:0005737;GO:0005829;GO:0006742;GO:0006801;GO:0006909;GO:0008022;GO:0009749;GO:0014070;GO:0016020;GO:0016175;GO:0016175;GO:0016176;GO:0032496;GO:0032870;GO:0042554;GO:0042554;GO:0043020;GO:0043085;GO:0043525;GO:0045730;GO:0045777;GO:0048365;GO:0048365;GO:0055114;	K08010	neutrophil cytosolic factor 2 [Source:MGISymbol;Acc:MGI:97284]
MGP_C57BL6NJ_G0016995	6341	2646	33.913	2218	22.7375	1090	7.90764	1991	32.7906	1757	29.2425	1710	26.8077	1	163061978	163133268	-	6341	Smg7	GO:0000184;GO:0000184;GO:0004540;GO:0005634;GO:0005634;GO:0005634;GO:0005697;GO:0005737;GO:0005737;GO:0005737;GO:0005737;GO:0005829;GO:0006406;GO:0007004;GO:0042162;GO:0042162;GO:0043021;GO:0043487;GO:0045111;GO:0051721;GO:0051721;GO:0070034;GO:0090501;	K14409	Smg-7 homolog, nonsense mediated mRNA decay factor(C. elegans) [Source:MGI Symbol;Acc:MGI:2682334]
MGP_C57BL6NJ_G0016996	5809	146	2.04261	161	1.80162	2	0.0158382	4	0.0719109	0	0	4	0.068451	1	163188646	163371791	+	5809	Nmnat2	GO:0000139;GO:0000166;GO:0000309;GO:0000309;GO:0003824;GO:0004515;GO:0004515;GO:0004515;GO:0005524;GO:0005737;GO:0005770;GO:0005794;GO:0005794;GO:0005794;GO:0005802;GO:0009058;GO:0009435;GO:0016020;GO:0016740;GO:0016779;GO:0019363;GO:0030424;GO:0030659;GO:0031410;GO:0034628;GO:0042995;GO:0045202;GO:0005770;GO:0005794;GO:0005802;GO:0045202;	-	nicotinamide nucleotide adenylyltransferase 2[Source:MGI Symbol;Acc:MGI:2444155]
MGP_C57BL6NJ_G0016997	8129	121	1.20971	112	0.895612	57	0.322564	9	0.115622	0	0	3	0.0366864	1	163375286	163447458	-	8129	Lamc2	GO:0005604;GO:0048731;GO:0070831;	K06246	laminin, gamma 2 [Source:MGI Symbol;Acc:MGI:99913]"
MGP_C57BL6NJ_G0016998	8271	2808	27.5913	2947	23.1612	1049	5.83439	759	9.58341	625	7.97485	617	7.41563	1	163481385	163600562	-	8271	Lamc1	-	K05635	laminin, gamma 1 [Source:MGI Symbol;Acc:MGI:99914]"
MGP_C57BL6NJ_G0016999	3710	0	0	10	0.175212	0	0	0	0	0	0	13	0.34833	1	163723813	163751253	+	3710	Shcbp1l	GO:0005515;GO:0005515;GO:0005737;GO:0005819;GO:0005856;GO:0007283;GO:0007283;GO:0030154;GO:0072687;GO:0072687;GO:2001252;GO:2001252;	-	Shc SH2-domain binding protein 1-like [Source:MGISymbol;Acc:MGI:1919086]
MGP_C57BL6NJ_G0017000	9603	4579	38.7523	4305	29.141	1705	8.16762	3333	36.2464	3466	38.091	2972	30.7654	1	163754437	163787534	-	9603	Dhx9	GO:0000166;GO:0003676;GO:0003723;GO:0004386;GO:0005524;GO:0005524;GO:0006366;GO:0016787;	K13184	DEAH (Asp-Glu-Ala-His) box polypeptide 9[Source:MGI Symbol;Acc:MGI:108177]
MGP_C57BL6NJ_G0017001	2961	26	0.713622	63	1.38306	201	3.12274	37	1.30497	6	0.213852	38	1.27575	1	163805382	163856883	-	2961	Npl	GO:0003824;GO:0005575;GO:0005737;GO:0005975;GO:0008152;GO:0008747;GO:0008747;GO:0008747;GO:0016829;GO:0016829;GO:0019262;GO:0042802;	K01639	N-acetylneuraminate pyruvate lyase [Source:MGISymbol;Acc:MGI:1921341]
MGP_C57BL6NJ_G0017002	9640	0	0	5	0.0337157	0	0	0	0	0	0	0	0	1	163971381	164019721	+	9640	Rgs8	GO:0001965;GO:0005096;GO:0005096;GO:0005096;GO:0005634;GO:0005634;GO:0005737;GO:0005886;GO:0005886;GO:0007186;GO:0007186;GO:0007213;GO:0007213;GO:0009968;GO:0016020;GO:0030425;GO:0030425;GO:0031234;GO:0031234;GO:0032809;GO:0032809;GO:0042995;GO:0043204;GO:0043547;GO:0043547;GO:0043547;GO:0060159;GO:0060159;	K16449	regulator of G-protein signaling 8 [Source:MGISymbol;Acc:MGI:108408]
MGP_C57BL6NJ_G0017003	2339	437	15.1839	705	19.5929	22	0.432684	65	2.90215	23	1.03776	44	1.87001	1	164060203	164066203	+	2339	Rgs16	GO:0005096;GO:0005096;GO:0005096;GO:0005515;GO:0005737;GO:0005886;GO:0007186;GO:0007186;GO:0007186;GO:0009968;GO:0016020;GO:0031224;GO:0031224;GO:0043547;GO:0043547;GO:0043547;GO:0045121;	K16449	regulator of G-protein signaling 16 [Source:MGISymbol;Acc:MGI:108407]
MGP_C57BL6NJ_G0017004	4536	426	7.63256	576	8.25445	454	4.60427	622	14.3204	847	19.7066	573	12.5575	1	164070239	164082473	+	4536	Rnasel	GO:0000166;GO:0003723;GO:0003723;GO:0004518;GO:0004519;GO:0004540;GO:0004540;GO:0004672;GO:0005524;GO:0005524;GO:0005737;GO:0005739;GO:0006364;GO:0006397;GO:0006468;GO:0016363;GO:0016787;GO:0019843;GO:0042802;GO:0043021;GO:0043488;GO:0045071;GO:0045444;GO:0045944;GO:0046872;GO:0051607;GO:0051607;GO:0090305;GO:0090501;GO:2001275;GO:0043021;GO:0043488;GO:0045444;GO:2001275;	-	ribonuclease L (2', 5'-oligoisoadenylatesynthetase-dependent) [Source:MGI Symbol;Acc:MGI:1098272]
MGP_C57BL6NJ_G0017005	5219	0	0	0	0	5	0.0440718	9	0.180091	6	0.121329	3	0.0571419	1	164099747	164173785	-	5219	Rgsl1	GO:0005096;GO:0005737;GO:0005886;GO:0016020;GO:0016021;GO:0043547;	-	regulator of G-protein signaling like 1 [Source:MGISymbol;Acc:MGI:2685048]
MGP_C57BL6NJ_G0017006	4905	7	0.115983	4	0.0530102	5	0.0468931	14	0.298075	0	0	3	0.0607999	1	164179116	164242738	-	4905	Teddm2	GO:0003674;GO:0005575;GO:0008150;GO:0016020;GO:0016021;	-	transmembrane epididymal family member 2[Source:MGI Symbol;Acc:MGI:1923273]
MGP_C57BL6NJ_G0017007	2549	0	0	0	0	0	0	0	0	0	0	0	0	1	164206384	164212085	+	2549	Teddm1b	GO:0003674;GO:0005575;GO:0008150;GO:0016020;GO:0016021;	-	transmembrane epididymal protein 1B [Source:MGISymbol;Acc:MGI:3646829]
MGP_C57BL6NJ_G0017008	1163	0	0	0	0	0	0	0	0	0	0	0	0	1	164228909	164235568	+	1163	Teddm1a	GO:0016020;GO:0016021;	-	transmembrane epididymal protein 1A [Source:MGISymbol;Acc:MGI:2668439]
MGP_C57BL6NJ_G0017009	3323	8742	213.803	7505	146.811	5630	77.9393	7270	228.476	5926	188.205	7966	238.304	1	164242454	164257514	+	3323	Glul	GO:0000166;GO:0000287;GO:0003824;GO:0004351;GO:0004356;GO:0004356;GO:0004356;GO:0005515;GO:0005515;GO:0005524;GO:0005524;GO:0005634;GO:0005737;GO:0005737;GO:0005737;GO:0005739;GO:0005739;GO:0005739;GO:0005791;GO:0005829;GO:0006536;GO:0006542;GO:0006542;GO:0006807;GO:0008283;GO:0009267;GO:0009267;GO:0009749;GO:0009749;GO:0016595;GO:0016829;GO:0016874;GO:0019676;GO:0030145;GO:0032024;GO:0032991;GO:…	K01915	glutamate-ammonia ligase (glutamine synthetase)[Source:MGI Symbol;Acc:MGI:95739]
MGP_C57BL6NJ_G0017010	1892	0	0	0	0	0	0	0	0	0	0	0	0	1	164569149	164573633	+	1892	Zfp648	GO:0003674;GO:0003676;GO:0003677;GO:0005575;GO:0005634;GO:0008150;	-	zinc finger protein 648 [Source:MGISymbol;Acc:MGI:2685049]
MGP_C57BL6NJ_G0017011	24710	5	0.0164449	0	0	0	0	33	0.139469	33	0.140943	35	0.140804	1	164768234	165282160	-	24710	Cacna1e	GO:0005216;GO:0005244;GO:0005245;GO:0005262;GO:0005509;GO:0005891;GO:0006811;GO:0006816;GO:0016020;GO:0016020;GO:0016021;GO:0034765;GO:0055085;GO:0070588;GO:0070588;	K04852	calcium channel, voltage-dependent, R type, alpha1E subunit [Source:MGI Symbol;Acc:MGI:106217]
MGP_C57BL6NJ_G0017012	3276	216	5.3585	508	10.08	926	13.0031	243	7.74638	259	8.34366	276	8.37502	1	165512540	165515815	-	3276	Ier5	GO:0000159;GO:0000159;GO:0005634;GO:0005634;GO:0005737;GO:0005737;GO:0006351;GO:0006355;GO:0034605;GO:0034605;GO:0042127;GO:0042127;GO:0042802;GO:0042802;GO:0045944;GO:0045944;GO:1900036;GO:1900036;	-	immediate early response 5 [Source:MGISymbol;Acc:MGI:1337072]
MGP_C57BL6NJ_G0017013	5981	555	7.54141	489	5.31464	241	1.85362	336	5.86681	379	6.68754	330	5.4848	1	165545219	165564443	-	5981	Mr1	GO:0002367;GO:0002376;GO:0002474;GO:0005783;GO:0005783;GO:0005886;GO:0005886;GO:0005886;GO:0006955;GO:0016020;GO:0016021;GO:0032611;GO:0032620;GO:0042612;GO:0045087;GO:0050829;GO:0002367;GO:0032611;GO:0032620;GO:0050829;	-	major histocompatibility complex, class I-related[Source:MGI Symbol;Acc:MGI:1195463]
MGP_C57BL6NJ_G0017014	10599	663	5.08373	845	5.1824	1652	7.17007	391	3.85255	590	5.87473	444	4.16427	1	165576104	165629397	+	10599	Stx6	GO:0000139;GO:0000149;GO:0005484;GO:0005484;GO:0005515;GO:0005515;GO:0005654;GO:0005769;GO:0005794;GO:0005794;GO:0005794;GO:0005802;GO:0005802;GO:0005829;GO:0006810;GO:0006886;GO:0006886;GO:0006906;GO:0006906;GO:0007032;GO:0007032;GO:0008021;GO:0008021;GO:0012505;GO:0015031;GO:0016020;GO:0016020;GO:0016020;GO:0016020;GO:0016021;GO:0016021;GO:0016021;GO:0016189;GO:0016192;GO:0016192;GO:0019905;GO:…	K08498	syntaxin 6 [Source:MGI Symbol;Acc:MGI:1926235]"
MGP_C57BL6NJ_G0017015	7856	110	1.13795	258	2.1348	0	0	0	0	0	0	7	0.0885763	1	165633612	165667356	-	7856	BC034090	-	-	cDNA sequence BC034090 [Source:MGISymbol;Acc:MGI:2672904]
MGP_C57BL6NJ_G0017016	17881	7809	35.4925	7989	29.0429	4493	11.5591	3694	21.5745	3292	19.4298	3492	19.4135	1	165699195	165864051	-	17881	Xpr1	GO:0000822;GO:0000822;GO:0001618;GO:0001618;GO:0001618;GO:0004872;GO:0004872;GO:0005737;GO:0005794;GO:0005886;GO:0005886;GO:0009615;GO:0009615;GO:0015114;GO:0015114;GO:0015562;GO:0015562;GO:0016020;GO:0016021;GO:0016021;GO:0030643;GO:0030643;GO:0031226;GO:0031226;GO:0035435;GO:0035435;GO:0046718;	-	xenotropic and polytropic retrovirus receptor 1[Source:MGI Symbol;Acc:MGI:97932]
MGP_C57BL6NJ_G0017017	6439	134	1.6913	311	3.13965	265	1.89324	156	2.53013	145	2.37657	214	3.30382	1	166008586	166144467	+	6439	Acbd6	GO:0000062;GO:0003674;GO:0005737;GO:0008150;GO:0008289;	-	acyl-Coenzyme A binding domain containing 6[Source:MGI Symbol;Acc:MGI:1919732]
MGP_C57BL6NJ_G0017018	5740	0	0	0	0	0	0	0	0	0	0	0	0	1	166154831	166209449	-	5740	Lhx4	GO:0001890;GO:0001890;GO:0003677;GO:0003677;GO:0005622;GO:0005622;GO:0005634;GO:0005654;GO:0006351;GO:0006355;GO:0006355;GO:0008045;GO:0008045;GO:0008327;GO:0008327;GO:0009887;GO:0009887;GO:0021526;GO:0021526;GO:0043066;GO:0043066;GO:0043565;GO:0043565;GO:0045944;GO:0046872;	K09374	LIM homeobox protein 4 [Source:MGISymbol;Acc:MGI:101776]
MGP_C57BL6NJ_G0017019	8291	574	5.6265	1670	13.0933	1203	6.67478	119	1.49891	128	1.62931	85	1.01914	1	166234473	166271323	-	8291	Qsox1	GO:0005615;	K10758	quiescin Q6 sulfhydryl oxidase 1 [Source:MGISymbol;Acc:MGI:1330818]
MGP_C57BL6NJ_G0017020	16526	4762	23.4183	5266	20.7134	1019	2.83651	3800	24.0133	5101	32.5753	3372	20.2834	1	166303235	166441746	-	16526	Cep350	GO:0005515;GO:0005634;GO:0005737;GO:0005813;GO:0005813;GO:0005813;GO:0005814;GO:0005814;GO:0005815;GO:0005819;GO:0005856;GO:0008017;GO:0008150;GO:0016020;GO:0034453;GO:0042995;	K16768	centrosomal protein 350 [Source:MGISymbol;Acc:MGI:1921331]
MGP_C57BL6NJ_G0017021	5406	3725	55.9994	2952	35.496	1673	14.2363	4042	78.083	3795	74.0861	3313	60.9209	1	166491209	166531336	-	5406	Tor1aip1	GO:0001671;GO:0001671;GO:0005515;GO:0005521;GO:0005634;GO:0005634;GO:0005635;GO:0005637;GO:0008092;GO:0016020;GO:0016021;GO:0031965;GO:0032781;GO:0032781;GO:0034504;GO:0051117;GO:0071763;GO:0005635;GO:0034504;GO:0071763;	-	torsin A interacting protein 1 [Source:MGISymbol;Acc:MGI:3582693]
MGP_C57BL6NJ_G0017022	9218	2536	22.3587	3227	22.7563	2978	14.8616	1847	20.9251	1891	21.6499	1601	17.2654	1	166530259	166563476	+	9218	Tor1aip2	GO:0001671;GO:0001671;GO:0005515;GO:0005634;GO:0005635;GO:0005783;GO:0005783;GO:0005783;GO:0005789;GO:0007029;GO:0007029;GO:0016020;GO:0016021;GO:0032781;GO:0032781;GO:0051117;GO:0090435;	K23001	torsin A interacting protein 2 [Source:MGISymbol;Acc:MGI:3582695]
MGP_C57BL6NJ_G0017023	3882	0	0	0	0	0	0	0	0	0	0	0	0	1	166570582	166655764	-	3882	Fam163a	GO:0003674;GO:0005575;GO:0008150;GO:0016020;GO:0016021;	-	family with sequence similarity 163, member A[Source:MGI Symbol;Acc:MGI:3618859]
MGP_C57BL6NJ_G0017024	6937	0	0	0	0	6	0.0397885	0	0	0	0	0	0	1	166708338	166761059	-	6937	Tdrd5	GO:0003674;GO:0005737;GO:0007275;GO:0007281;GO:0007283;GO:0007286;GO:0007286;GO:0030154;GO:0030719;GO:0030719;GO:0033391;GO:0033391;GO:0043046;GO:0043046;GO:0071546;GO:0071546;	K18407	tudor domain containing 5 [Source:MGISymbol;Acc:MGI:2684949]
MGP_C57BL6NJ_G0017025	3116	0	0	0	0	0	0	0	0	0	0	0	0	1	166768122	166786594	+	3116	Nphs2	GO:0005515;GO:0005886;GO:0005886;GO:0005887;GO:0005911;GO:0007588;GO:0016020;GO:0016020;GO:0016021;GO:0031235;GO:0031235;GO:0031235;GO:0031532;GO:0031532;GO:0032991;GO:0036057;GO:0036057;GO:0036057;GO:0043234;GO:0045121;GO:0070062;	K18268	nephrosis 2, podocin [Source:MGISymbol;Acc:MGI:2157018]
MGP_C57BL6NJ_G0017026	5251	0	0	12	0.148552	0	0	18	0.357987	1	0.0200983	5	0.0946562	1	166782068	166894824	-	5251	Axdnd1	-	-	axonemal dynein light chain domain containing 1[Source:MGI Symbol;Acc:MGI:1924602]
MGP_C57BL6NJ_G0017027	9779	9410	78.2039	10659	70.8534	19792	93.1051	6731	71.8822	7456	80.466	7551	76.7593	1	166898190	166953758	-	9779	Soat1	GO:0000062;GO:0004772;GO:0004772;GO:0005783;GO:0005783;GO:0005789;GO:0005789;GO:0005789;GO:0006629;GO:0008202;GO:0008203;GO:0008203;GO:0008203;GO:0008203;GO:0008374;GO:0010742;GO:0010878;GO:0015485;GO:0016020;GO:0016020;GO:0016020;GO:0016021;GO:0016740;GO:0016746;GO:0033344;GO:0034379;GO:0034435;GO:0034435;GO:0034736;GO:0034736;GO:0034736;GO:0034736;GO:0042632;GO:0042986;	K00637	sterol O-acyltransferase 1 [Source:MGISymbol;Acc:MGI:104665]
MGP_C57BL6NJ_G0017028	10800	1631	12.2734	2616	15.7454	2802	11.935	673	6.5077	882	8.61878	780	7.17946	1	167047589	167149537	+	10800	Abl2	GO:0000166;GO:0004672;GO:0004713;GO:0004713;GO:0004715;GO:0004715;GO:0005524;GO:0005524;GO:0005623;GO:0006468;GO:0016301;GO:0016310;GO:0016740;GO:0018108;	-	v-abl Abelson murine leukemia viral oncogene 2(arg, Abelson-related gene) [Source:MGISymbol;Acc:MGI:87860]
MGP_C57BL6NJ_G0017029	3892	1054	22.009	1651	27.5748	5117	60.4813	1489	39.9538	1585	42.9791	1193	30.4711	1	167155265	167180515	-	3892	Tor3a	GO:0000166;GO:0005515;GO:0005524;GO:0005524;GO:0005737;GO:0005783;GO:0005783;GO:0005788;GO:0005788;GO:0005788;GO:0016887;GO:0016887;GO:0070062;	K23000	torsin family 3, member A [Source:MGISymbol;Acc:MGI:1353652]
MGP_C57BL6NJ_G0017030	8770	1079	9.99897	1096	8.12362	2045	10.7268	708	8.43082	799	9.61497	763	8.6486	1	167184691	167238613	-	8770	Fam20b	GO:0000139;GO:0000166;GO:0005524;GO:0005615;GO:0005615;GO:0005654;GO:0005794;GO:0005794;GO:0005794;GO:0016020;GO:0016021;GO:0016301;GO:0016310;GO:0016740;GO:0016773;GO:0016773;GO:0016773;GO:0046872;GO:0062023;GO:1903955;	K20825	family with sequence similarity 20, member B[Source:MGI Symbol;Acc:MGI:2443990]
MGP_C57BL6NJ_G0017031	12004	70	0.473921	41	0.222022	20	0.0766447	78	0.678586	55	0.483546	17	0.140781	1	167330054	167481797	-	12004	Ralgps2	GO:0003674;GO:0005085;GO:0005085;GO:0005575;GO:0005622;GO:0005737;GO:0005886;GO:0007264;GO:0008150;GO:0016020;GO:0032485;GO:0065009;	-	Ral GEF with PH domain and SH3 binding motif 2[Source:MGI Symbol;Acc:MGI:1925505]
MGP_C57BL6NJ_G0017032	2841	5	0.143032	2	0.0457612	0	0	0	0	0	0	0	0	1	167364271	167398920	+	2841	Angptl1	GO:0005102;GO:0005102;GO:0005576;GO:0005615;GO:0007169;GO:0007169;GO:0070062;	-	angiopoietin-like 1 [Source:MGISymbol;Acc:MGI:1919963]
MGP_C57BL6NJ_G0017033	1093	0	0	0	0	0	0	0	0	0	0	0	0	1	167659467	167669006	-	1093	Tex35	GO:0016020;GO:0016021;	-	testis expressed 35 [Source:MGISymbol;Acc:MGI:1920685]
MGP_C57BL6NJ_G0017034	13740	1144	6.76664	1299	6.14556	483	1.61711	195	1.48212	276	2.11994	185	1.33846	1	167699360	168011409	-	13740	Rasal2	GO:0005096;GO:0005096;GO:0005737;GO:0007165;GO:0031235;GO:0043087;GO:0043547;GO:0046580;	K17633	RAS protein activator like 2 [Source:MGISymbol;Acc:MGI:2443881]
MGP_C57BL6NJ_G0017035	2339	74	2.57119	69	1.9176	906	17.8187	45	2.00918	45	2.03041	32	1.36001	1	168062450	168096093	+	2339	BC026585	GO:0005739;GO:0016020;GO:0016021;GO:0016491;GO:0016491;GO:0055114;GO:0055114;GO:0005739;	-	cDNA sequence BC026585 [Source:MGISymbol;Acc:MGI:2448516]
MGP_C57BL6NJ_G0017036	5410	37	0.555825	94	1.12946	77	0.654744	0	0	3	0.0585228	3	0.0551245	1	168111500	168178836	+	5410	Sec16b	GO:0000139;GO:0003674;GO:0005783;GO:0005789;GO:0005794;GO:0006810;GO:0007029;GO:0007029;GO:0007030;GO:0007031;GO:0010628;GO:0012507;GO:0015031;GO:0016020;GO:0016192;GO:0016559;GO:0043231;GO:0048208;GO:0048208;GO:0070863;GO:0070863;GO:0070971;GO:0070973;	K20353	SEC16 homolog B (S. cerevisiae) [Source:MGISymbol;Acc:MGI:2148802]
MGP_C57BL6NJ_G0017037	8757	0	0	0	0	0	0	0	0	0	0	0	0	1	168914559	169028393	-	8757	Brinp2	GO:0003674;GO:0005576;GO:0005783;GO:0005783;GO:0007049;GO:0007050;GO:0030425;GO:0030425;GO:0043025;GO:0043025;GO:0045666;GO:0045666;GO:0045666;GO:0045786;GO:0045930;GO:0045930;GO:0045930;GO:0071300;GO:0071300;GO:0045666;GO:0045930;GO:0071300;	-	bone morphogenic protein/retinoic acid inducibleneural-specific 2 [Source:MGI Symbol;Acc:MGI:2443333]
MGP_C57BL6NJ_G0017038	9839	1	0.00826005	0	0	0	0	0	0	0	0	0	0	1	169034267	169393183	+	9839	Astn1	GO:0001764;GO:0001764;GO:0005515;GO:0005768;GO:0005768;GO:0005768;GO:0005886;GO:0007155;GO:0007158;GO:0007158;GO:0007626;GO:0007626;GO:0009897;GO:0009897;GO:0016020;GO:0016021;GO:0016021;GO:0016021;GO:0016477;GO:0016477;GO:0030136;GO:0031410;GO:0043204;GO:0098609;GO:0098609;	-	astrotactin 1 [Source:MGI Symbol;Acc:MGI:1098567]"
MGP_C57BL6NJ_G0017039	10252	6	0.0475638	0	0	6	0.0269228	7	0.071306	0	0	3	0.0290893	1	169418090	169713019	-	10252	Pappa2	GO:0004222;GO:0005829;GO:0006508;GO:0006508;GO:0008237;GO:0008237;GO:0008270;GO:0016324;GO:0060349;GO:0060349;GO:0070062;	K08647	pappalysin 2 [Source:MGI Symbol;Acc:MGI:3051647]"
MGP_C57BL6NJ_G0017040	17501	2422	11.2472	2278	8.46116	1044	2.7442	1411	8.41978	2000	12.0606	1330	7.55457	1	169978729	170102905	+	17501	Rfwd2	GO:0000139;GO:0005515;GO:0005515;GO:0005634;GO:0005737;GO:0010212;GO:0016567;GO:0016607;GO:0016740;GO:0031464;GO:0032436;GO:0043161;GO:0046872;GO:0061630;	-	ring finger and WD repeat domain 2 [Source:MGISymbol;Acc:MGI:1347046]
MGP_C57BL6NJ_G0017041	12867	0	0	9	0.0454678	0	0	6	0.0486979	4	0.0328083	7	0.0540806	1	170284448	170730854	+	12867	Tnr	GO:0005178;GO:0005576;GO:0005578;GO:0005578;GO:0005578;GO:0005578;GO:0007155;GO:0007155;GO:0007158;GO:0007158;GO:0007162;GO:0008306;GO:0008306;GO:0009986;GO:0009986;GO:0010977;GO:0010977;GO:0022029;GO:0022029;GO:0022408;GO:0022408;GO:0030198;GO:0030198;GO:0030517;GO:0030517;GO:0031012;GO:0031012;GO:0035641;GO:0035641;GO:0045121;GO:0045121;GO:0046625;GO:0048692;GO:0048692;GO:0050767;GO:0050804;GO:…	K06252	tenascin R [Source:MGI Symbol;Acc:MGI:99516]"
MGP_C57BL6NJ_G0017042	10195	162	1.2914	184	1.17319	172	0.776103	73	0.747777	79	0.817788	66	0.643543	1	170836937	170872387	+	10195	4930523C07Rik	-	-	RIKEN cDNA 4930523C07 gene [Source:MGISymbol;Acc:MGI:1914897]
MGP_C57BL6NJ_G0017043	5817	356	4.97376	487	5.44213	11	0.0869905	27	0.484731	16	0.290283	4	0.0683568	1	170877208	170947626	-	5817	Tnn	GO:0002076;GO:0002076;GO:0005178;GO:0005178;GO:0005576;GO:0005578;GO:0005578;GO:0005578;GO:0007160;GO:0007160;GO:0007409;GO:0007409;GO:0009986;GO:0009986;GO:0016049;GO:0016049;GO:0016477;GO:0016477;GO:0031012;GO:0031012;GO:0033689;GO:0033689;GO:0042802;GO:0042802;GO:0043005;GO:0043005;GO:0043025;GO:0043025;GO:0045668;GO:0045668;GO:0097442;GO:0097442;GO:1905240;GO:1905240;GO:1990026;GO:1990026;	K06252	tenascin N [Source:MGI Symbol;Acc:MGI:2665790]"
MGP_C57BL6NJ_G0017044	3258	56	1.39692	118	2.35434	442	6.24093	49	1.57066	85	2.7534	62	1.89174	1	170999716	171006671	+	3258	Mrps14	GO:0003723;GO:0003735;GO:0003735;GO:0003735;GO:0005515;GO:0005622;GO:0005739;GO:0005739;GO:0005763;GO:0005763;GO:0005763;GO:0005840;GO:0005840;GO:0006412;GO:0006412;GO:0030529;GO:0005739;	-	mitochondrial ribosomal protein S14 [Source:MGISymbol;Acc:MGI:1928141]
MGP_C57BL6NJ_G0017045	2390	933	31.7261	1006	27.3614	568	10.9327	618	27.0039	513	22.6527	534	22.2108	1	171006868	171019000	-	2390	Cacybp	GO:0005515;GO:0005515;GO:0005515;GO:0005634;GO:0005634;GO:0005634;GO:0005641;GO:0005641;GO:0005654;GO:0005737;GO:0005737;GO:0005737;GO:0005829;GO:0007507;GO:0015631;GO:0019005;GO:0019005;GO:0019904;GO:0019904;GO:0030877;GO:0030877;GO:0031625;GO:0031625;GO:0031625;GO:0042803;GO:0043005;GO:0044297;GO:0044548;GO:0045740;GO:0055007;GO:0060416;GO:0060548;GO:0070062;GO:1990830;GO:1990830;	K04507	calcyclin binding protein [Source:MGISymbol;Acc:MGI:1270839]
MGP_C57BL6NJ_G0017046	23096	544	1.91424	693	1.95045	344	0.685172	328	1.48311	372	1.69984	224	0.964122	1	171025293	171663857	-	23096	Rabgap1l	GO:0005096;GO:0005096;GO:0005096;GO:0005096;GO:0005622;GO:0005634;GO:0005768;GO:0005769;GO:0005769;GO:0005794;GO:0005794;GO:0006810;GO:0006886;GO:0006897;GO:0007049;GO:0012505;GO:0015031;GO:0017137;GO:0017137;GO:0031338;GO:0032880;GO:0035855;GO:0043547;GO:0090630;	-	RAB GTPase activating protein 1-like [Source:MGISymbol;Acc:MGI:1352507]
MGP_C57BL6NJ_G0017047	11006	2018	14.9013	2655	15.681	706	2.95089	1339	12.7054	1521	14.5848	1183	10.685	1	171778918	171865483	+	11006	Rc3h1	GO:0000209;GO:0000209;GO:0000288;GO:0000288;GO:0000932;GO:0000932;GO:0000932;GO:0000956;GO:0000956;GO:0000956;GO:0000956;GO:0001782;GO:0001782;GO:0002634;GO:0002634;GO:0002635;GO:0002635;GO:0003723;GO:0003723;GO:0003725;GO:0003725;GO:0003729;GO:0003729;GO:0003730;GO:0003730;GO:0003730;GO:0003730;GO:0004842;GO:0004842;GO:0005515;GO:0005515;GO:0005737;GO:0005737;GO:0005737;GO:0008270;GO:0008270;GO:…	K15690	RING CCCH (C3H) domains 1 [Source:MGISymbol;Acc:MGI:2685397]
MGP_C57BL6NJ_G0017048	8546	30	0.285293	12	0.0912761	12	0.0645947	9	0.109981	36	0.44457	22	0.255906	1	171874953	171903181	+	8546	Serpinc1	-	-	serine (or cysteine) peptidase inhibitor, clade C(antithrombin), member 1 [Source:MGISymbol;Acc:MGI:88095]
MGP_C57BL6NJ_G0017049	18814	483	2.08641	732	2.52912	28	0.0684629	350	1.94278	467	2.61961	250	1.32093	1	171900240	171932436	-	18814	Zbtb37	GO:0003674;GO:0003676;GO:0005575;GO:0008150;	K10509	zinc finger and BTB domain containing 37[Source:MGI Symbol;Acc:MGI:2444467]
MGP_C57BL6NJ_G0017050	5195	138	2.15887	208	2.60265	474	4.19731	94	1.88964	82	1.66582	67	1.28207	1	171938188	171971185	-	5195	Dars2	GO:0000166;GO:0000166;GO:0003676;GO:0004812;GO:0004812;GO:0004815;GO:0004815;GO:0005524;GO:0005524;GO:0005634;GO:0005737;GO:0005739;GO:0005739;GO:0005739;GO:0005759;GO:0006412;GO:0006418;GO:0016874;GO:0016874;GO:0042803;GO:0043039;GO:0050560;GO:0070145;GO:0070145;	K01876	aspartyl-tRNA synthetase 2 (mitochondrial)[Source:MGI Symbol;Acc:MGI:2442510]
MGP_C57BL6NJ_G0017051	5631	184	2.65562	138	1.59306	55	0.44932	140	2.59644	203	3.80462	205	3.61901	1	171971240	171990154	+	5631	Cenpl	GO:0000775;GO:0003674;GO:0005575;GO:0005634;GO:0005694;GO:0008150;	-	centromere protein L [Source:MGISymbol;Acc:MGI:1917704]
MGP_C57BL6NJ_G0017052	12626	919	5.91539	774	3.98487	505	1.83994	724	5.98838	658	5.49998	714	5.62151	1	171994079	172038709	-	12626	Klhl20	-	K10457	kelch-like 20 [Source:MGI Symbol;Acc:MGI:2444855]"
MGP_C57BL6NJ_G0017053	3759	0	0	0	0	0	0	0	0	0	0	0	0	1	172049885	172081882	+	3759	Ankrd45	GO:0003674;GO:0005575;GO:0008150;	-	ankyrin repeat domain 45 [Source:MGISymbol;Acc:MGI:1921094]
MGP_C57BL6NJ_G0017054	4799	663	11.2278	945	12.8003	5144	49.3093	423	9.20505	357	7.85088	460	9.52858	1	172154466	172165568	-	4799	Prdx6	GO:0005623;GO:0016209;GO:0016491;GO:0045454;GO:0051920;GO:0055114;GO:0098869;	K11188	peroxiredoxin 6 [Source:MGI Symbol;Acc:MGI:894320]"
MGP_C57BL6NJ_G0017055	1842	0	0	14	0.494057	22	0.549429	0	0	8	0.458354	0	0	1	172313889	172338247	+	1842	Tnfsf4	GO:0001568;GO:0001816;GO:0002215;GO:0002215;GO:0002526;GO:0002526;GO:0002699;GO:0002726;GO:0002726;GO:0002819;GO:0002819;GO:0002830;GO:0002830;GO:0002891;GO:0002891;GO:0005125;GO:0005164;GO:0005164;GO:0005164;GO:0005515;GO:0005615;GO:0005615;GO:0005615;GO:0005615;GO:0006954;GO:0006954;GO:0006954;GO:0006955;GO:0008203;GO:0008203;GO:0009615;GO:0009615;GO:0009986;GO:0009986;GO:0010469;GO:0016020;GO:…	K05469	tumor necrosis factor (ligand) superfamily, member4 [Source:MGI Symbol;Acc:MGI:104511]
MGP_C57BL6NJ_G0017056	2066	0	0	7	0.220245	0	0	0	0	0	0	0	0	1	172423416	172434051	+	2066	Tnfsf18	GO:0002250;GO:0002309;GO:0002309;GO:0002309;GO:0002376;GO:0002687;GO:0005125;GO:0005164;GO:0005515;GO:0005615;GO:0005886;GO:0006955;GO:0007267;GO:0009986;GO:0009986;GO:0009986;GO:0010469;GO:0010759;GO:0010759;GO:0016020;GO:0016020;GO:0016021;GO:0032813;GO:0032813;GO:0032813;GO:0033209;GO:0033209;GO:0033209;GO:0042129;GO:0042129;GO:0042129;GO:0042531;GO:0042802;GO:0042802;GO:0042802;GO:0045785;GO:…	K05479	tumor necrosis factor (ligand) superfamily, member18 [Source:MGI Symbol;Acc:MGI:2673064]
MGP_C57BL6NJ_G0017057	1937	0	0	0	0	0	0	19	1.02438	15	0.817264	13	0.667167	1	172729614	172739012	-	1937	Fasl	GO:0000122;GO:0000122;GO:0005123;GO:0005125;GO:0005164;GO:0005164;GO:0005515;GO:0005576;GO:0005615;GO:0005615;GO:0005634;GO:0005634;GO:0005764;GO:0005886;GO:0005886;GO:0005901;GO:0006351;GO:0006355;GO:0006915;GO:0006915;GO:0006919;GO:0006925;GO:0006955;GO:0008284;GO:0008625;GO:0008625;GO:0009897;GO:0009897;GO:0009986;GO:0009986;GO:0010469;GO:0016020;GO:0016020;GO:0016021;GO:0016525;GO:0030644;GO:…	K04389	Fas ligand (TNF superfamily, member 6) [Source:MGISymbol;Acc:MGI:99255]
MGP_C57BL6NJ_G0017058	8928	1095	9.96766	1231	8.96278	620	3.19459	639	7.47452	903	10.6742	594	6.61383	1	172770545	172837636	-	8928	Suco	GO:0001503;GO:0003674;GO:0005737;GO:0005783;GO:0005791;GO:0005791;GO:0007275;GO:0016020;GO:0016020;GO:0016020;GO:0016021;GO:0030867;GO:0032967;GO:0032967;GO:0034975;GO:0045669;GO:0045669;GO:0046850;GO:0046850;GO:0046850;	-	SUN domain containing ossification factor[Source:MGI Symbol;Acc:MGI:2138346]
MGP_C57BL6NJ_G0017059	1167	0	0	0	0	0	0	0	0	0	0	0	0	1	172905078	172943600	-	1167	4930558K02Rik	GO:0003674;GO:0005575;GO:0008150;	-	RIKEN cDNA 4930558K02 gene [Source:MGISymbol;Acc:MGI:1922618]
MGP_C57BL6NJ_G0017060	4250	161	3.07872	207	3.16607	458	4.95741	88	2.16237	107	2.65703	139	3.25122	1	172932191	172936440	+	4250	Pigc	GO:0000506;GO:0000506;GO:0003824;GO:0005783;GO:0005789;GO:0006506;GO:0006506;GO:0006506;GO:0016020;GO:0016021;GO:0016021;GO:0016740;GO:0016757;GO:0017176;GO:0017176;	K03859	phosphatidylinositol glycan anchor biosynthesis,class C [Source:MGI Symbol;Acc:MGI:1914542]
MGP_C57BL6NJ_G0017061	24452	44	0.146242	32	0.0850696	0	0	8	0.0341674	28	0.120849	14	0.056916	1	172946417	173466590	-	24452	Dnm3	GO:0000166;GO:0000266;GO:0001917;GO:0003374;GO:0003924;GO:0003924;GO:0003924;GO:0005515;GO:0005515;GO:0005525;GO:0005525;GO:0005737;GO:0005737;GO:0005737;GO:0005739;GO:0005794;GO:0005856;GO:0005874;GO:0005886;GO:0006897;GO:0006897;GO:0007416;GO:0008017;GO:0014069;GO:0014069;GO:0016020;GO:0016185;GO:0016185;GO:0016787;GO:0030424;GO:0030424;GO:0031410;GO:0031623;GO:0031798;GO:0031802;GO:0031966;GO:…	-	dynamin 3 [Source:MGI Symbol;Acc:MGI:1341299]"
MGP_C57BL6NJ_G0017062	9739	164	1.36856	250	1.66865	294	1.38871	120	1.28678	132	1.43041	97	0.990098	1	173524326	173540749	-	9739	Mettl13	GO:0003674;GO:0005575;GO:0008150;GO:0008152;GO:0008168;GO:0008168;GO:0016740;GO:0032259;GO:0032259;	-	methyltransferase like 13 [Source:MGISymbol;Acc:MGI:1918699]
MGP_C57BL6NJ_G0017063	6856	1187	14.0706	1345	12.7524	720	4.83103	895	13.6329	879	13.5307	962	13.9484	1	173563960	173594715	+	6856	Vamp4	GO:0000149;GO:0000226;GO:0005484;GO:0005794;GO:0005794;GO:0005802;GO:0006887;GO:0006906;GO:0008021;GO:0008021;GO:0009986;GO:0016020;GO:0016021;GO:0016021;GO:0016189;GO:0016192;GO:0030285;GO:0031201;GO:0035493;GO:0042996;GO:0043001;GO:0045335;GO:0071346;GO:0090161;GO:1900242;GO:1901998;	K08513	vesicle-associated membrane protein 4 [Source:MGISymbol;Acc:MGI:1858730]
MGP_C57BL6NJ_G0017064	2074	0	0	0	0	0	0	2	0.100707	0	0	0	0	1	173641630	173652081	+	2074	Myoc	GO:0001649;GO:0001649;GO:0001649;GO:0001952;GO:0001953;GO:0001953;GO:0001968;GO:0005109;GO:0005515;GO:0005576;GO:0005578;GO:0005615;GO:0005615;GO:0005615;GO:0005615;GO:0005737;GO:0005739;GO:0005741;GO:0005741;GO:0005743;GO:0005743;GO:0005758;GO:0005758;GO:0005783;GO:0005783;GO:0005791;GO:0005794;GO:0005794;GO:0005794;GO:0005929;GO:0014068;GO:0014068;GO:0014734;GO:0014734;GO:0016020;GO:0022011;GO:…	K23027	myocilin [Source:MGI Symbol;Acc:MGI:1202864]"
MGP_C57BL6NJ_G0017065	969	0	0	0	0	0	0	0	0	0	0	0	0	1	173649668	173660658	-	969	7420461P10Rik	-	-	RIKEN cDNA 7420461P10 gene [Source:MGISymbol;Acc:MGI:3642786]
MGP_C57BL6NJ_G0017066	15688	15022	77.8204	16967	70.3034	1836	5.38373	10281	68.4391	11863	79.8046	9998	63.3529	1	173674034	173748632	-	15688	Prrc2c	GO:0002244;GO:0002244;GO:0003723;GO:0005829;GO:0008022;GO:0016020;GO:0002244;	-	proline-rich coiled-coil 2C [Source:MGISymbol;Acc:MGI:1913754]
MGP_C57BL6NJ_G0017067	3707	0	0	0	0	0	0	0	0	1	0.0284694	0	0	1	173804004	173822618	-	3707	Fmo4	GO:0004497;GO:0004497;GO:0004499;GO:0004499;GO:0005575;GO:0005783;GO:0005789;GO:0016020;GO:0016021;GO:0016491;GO:0031090;GO:0042737;GO:0042737;GO:0043231;GO:0050660;GO:0050661;GO:0055114;GO:0055114;GO:0055114;	K00485	flavin containing monooxygenase 4 [Source:MGISymbol;Acc:MGI:2429497]
MGP_C57BL6NJ_G0017068	5450	22	0.328065	3	0.0357819	0	0	0	0	0	0	0	0	1	173831893	173869221	-	5450	Fmo1	GO:0004497;GO:0004497;GO:0004497;GO:0004497;GO:0004499;GO:0004499;GO:0004499;GO:0005783;GO:0005789;GO:0006082;GO:0009404;GO:0016020;GO:0016021;GO:0016491;GO:0017144;GO:0017144;GO:0031090;GO:0043231;GO:0043231;GO:0050660;GO:0050661;GO:0055114;GO:0055114;GO:0070995;	K00485	flavin containing monooxygenase 1 [Source:MGISymbol;Acc:MGI:1310002]
MGP_C57BL6NJ_G0017069	5609	0	0	2	0.0231784	0	0	0	0	0	0	0	0	1	173878277	173905290	-	5609	Fmo2	GO:0004497;GO:0004497;GO:0004497;GO:0004497;GO:0004499;GO:0004499;GO:0004499;GO:0005783;GO:0005789;GO:0006082;GO:0006739;GO:0006805;GO:0009404;GO:0016020;GO:0016020;GO:0016021;GO:0016491;GO:0017144;GO:0031090;GO:0043231;GO:0050660;GO:0050661;GO:0055114;GO:0055114;GO:0070995;GO:0070995;GO:0072592;GO:0072592;	K00485	flavin containing monooxygenase 2 [Source:MGISymbol;Acc:MGI:1916776]
MGP_C57BL6NJ_G0017070	1957	0	0	0	0	0	0	0	0	0	0	0	0	1	173925078	173952483	-	1957	Fmo6	GO:0004497;GO:0004497;GO:0004499;GO:0004499;GO:0005575;GO:0005783;GO:0005789;GO:0016020;GO:0016021;GO:0016491;GO:0031090;GO:0043231;GO:0050660;GO:0050661;GO:0055114;GO:0055114;GO:0055114;	-	flavin containing monooxygenase 6 [Source:MGISymbol;Acc:MGI:2681841]
MGP_C57BL6NJ_G0017071	2413	0	0	0	0	0	0	0	0	0	0	0	0	1	173970827	174004297	-	2413	Fmo3	GO:0004497;GO:0004497;GO:0004499;GO:0004499;GO:0004499;GO:0005783;GO:0005789;GO:0016020;GO:0016021;GO:0016491;GO:0016597;GO:0017144;GO:0031090;GO:0034899;GO:0043231;GO:0043231;GO:0050660;GO:0050661;GO:0050661;GO:0055114;GO:0055114;GO:0055114;	K00485	flavin containing monooxygenase 3 [Source:MGISymbol;Acc:MGI:1100496]
MGP_C57BL6NJ_G0017072	2956	0	0	0	0	0	0	0	0	0	0	0	0	1	174041978	174108400	-	2956	Mroh9	GO:0003674;GO:0005575;GO:0008150;	-	maestro heat-like repeat family member 9[Source:MGI Symbol;Acc:MGI:1925508]
MGP_C57BL6NJ_G0017073	11044	3942	29.0084	3697	21.7601	15	0.0624803	430	4.0661	48	0.458686	146	1.31416	1	174294278	174363526	-	11044	Prrx1	GO:0000122;GO:0000122;GO:0000122;GO:0000978;GO:0000978;GO:0001078;GO:0001078;GO:0001105;GO:0001105;GO:0002053;GO:0002053;GO:0003677;GO:0003677;GO:0003677;GO:0003677;GO:0003713;GO:0003713;GO:0005634;GO:0005634;GO:0005634;GO:0005654;GO:0005730;GO:0005829;GO:0006355;GO:0006366;GO:0007275;GO:0030326;GO:0030326;GO:0042472;GO:0042472;GO:0042474;GO:0042474;GO:0043565;GO:0045880;GO:0045880;GO:0045944;GO:…	K09329	paired related homeobox 1 [Source:MGISymbol;Acc:MGI:97712]
MGP_C57BL6NJ_G0017074	2855	156	4.44071	217	4.94074	99	1.59517	128	4.6821	122	4.50977	100	3.48189	1	174443525	174462246	-	2855	Gorab	GO:0005515;GO:0005634;GO:0005654;GO:0005730;GO:0005737;GO:0005737;GO:0005737;GO:0005794;GO:0005794;GO:0005829;GO:0031069;GO:0031069;GO:1901622;GO:1901622;GO:1905515;GO:1905515;	K19748	golgin, RAB6-interacting [Source:MGISymbol;Acc:MGI:2138271]
MGP_C57BL6NJ_G0017075	1848	0	0	0	0	0	0	0	0	0	0	0	0	1	174794644	174812861	-	1848	Mettl11b	GO:0005634;GO:0005737;GO:0006480;GO:0006480;GO:0008168;GO:0008168;GO:0016740;GO:0032259;GO:0071885;	K19579	methyltransferase like 11B [Source:MGISymbol;Acc:MGI:2685053]
MGP_C57BL6NJ_G0017076	4012	550	11.1413	768	12.4434	634	7.26953	280	7.28842	341	8.97004	351	8.69695	1	174882039	175023465	+	4012	Kifap3	GO:0000794;GO:0001917;GO:0005515;GO:0005515;GO:0005783;GO:0005783;GO:0005794;GO:0005794;GO:0005813;GO:0005829;GO:0005871;GO:0005876;GO:0005930;GO:0005930;GO:0007017;GO:0007017;GO:0008104;GO:0008104;GO:0008285;GO:0008285;GO:0015630;GO:0015630;GO:0016939;GO:0016939;GO:0016939;GO:0019894;GO:0019894;GO:0030990;GO:0030990;GO:0032391;GO:0032391;GO:0036064;GO:0036064;GO:0043066;GO:0043066;GO:0046587;GO:…	-	kinesin-associated protein 3 [Source:MGISymbol;Acc:MGI:107566]
MGP_C57BL6NJ_G0017077	5825	477	6.65512	680	7.58843	438	3.45905	526	9.43032	477	8.64218	489	8.34514	1	175035935	175061980	+	5825	Scyl3	GO:0004672;GO:0005524;GO:0005737;GO:0005737;GO:0005794;GO:0005794;GO:0006468;GO:0008150;GO:0030027;GO:0030027;GO:0042995;	K17542	SCY1-like 3 (S. cerevisiae) [Source:MGISymbol;Acc:MGI:1921385]
MGP_C57BL6NJ_G0017078	4148	38	0.744523	50	0.783556	5	0.055451	50	1.25883	43	1.09403	47	1.12637	1	175052824	175105551	-	4148	BC055324	GO:0003674;GO:0005575;GO:0008150;	-	cDNA sequence BC055324 [Source:MGISymbol;Acc:MGI:3590554]
MGP_C57BL6NJ_G0017079	1513	75	4.02862	60	2.57781	19	0.577687	45	3.10606	16	1.11605	48	3.15372	1	175105644	175107940	+	1513	Mettl18	GO:0008150;GO:0008168;GO:0016740;GO:0031072;GO:0032259;GO:0032991;GO:0043234;	-	methyltransferase like 18 [Source:MGISymbol;Acc:MGI:1917212]
MGP_C57BL6NJ_G0017080	2912	3	0.0837266	5	0.111614	0	0	0	0	0	0	0	0	1	175163461	175172898	+	2912	Sele	GO:0005509;GO:0007155;GO:0007165;GO:0016020;GO:0016020;GO:0016021;GO:0030246;	K06494	selectin, endothelial cell [Source:MGISymbol;Acc:MGI:98278]
MGP_C57BL6NJ_G0017081	5911	1	0.013749	0	0	0	0	10	0.176675	30	0.535625	4	0.0672698	1	175178193	175200392	+	5911	Sell	GO:0002020;GO:0005509;GO:0005509;GO:0005515;GO:0005886;GO:0005886;GO:0005887;GO:0005887;GO:0007155;GO:0007155;GO:0009897;GO:0009986;GO:0016020;GO:0016020;GO:0016021;GO:0016339;GO:0016339;GO:0030246;GO:0033198;GO:0042981;GO:0046872;GO:0050839;GO:0050900;GO:0050901;GO:0050901;GO:0051861;GO:0070492;GO:0070492;GO:0090023;GO:0005886;GO:0009897;GO:0009986;GO:0033198;GO:0050839;	-	selectin, lymphocyte [Source:MGISymbol;Acc:MGI:98279]
MGP_C57BL6NJ_G0017082	4413	0	0	11	0.162031	16	0.166788	8	0.189318	14	0.334807	5	0.112631	1	175232081	175268452	+	4413	Selp	GO:0001530;GO:0002687;GO:0002687;GO:0002691;GO:0005509;GO:0005509;GO:0005509;GO:0005515;GO:0005615;GO:0005886;GO:0005887;GO:0005887;GO:0006954;GO:0006954;GO:0007155;GO:0007155;GO:0007157;GO:0007157;GO:0007159;GO:0007159;GO:0008201;GO:0009897;GO:0009897;GO:0010572;GO:0010572;GO:0014068;GO:0014068;GO:0016020;GO:0016020;GO:0016020;GO:0016020;GO:0016021;GO:0016339;GO:0016339;GO:0030246;GO:0031092;GO:…	K06496	selectin, platelet [Source:MGISymbol;Acc:MGI:98280]
MGP_C57BL6NJ_G0017083	7430	38	0.41565	66	0.577423	4	0.0247656	15	0.210833	18	0.255673	33	0.441516	1	175270226	175349395	+	7430	F5	GO:0005507;GO:0005576;GO:0005576;GO:0005615;GO:0005615;GO:0005783;GO:0005794;GO:0007596;GO:0007596;GO:0007596;GO:0007599;GO:0008015;GO:0008015;GO:0016020;GO:0031091;GO:0031091;GO:0046872;GO:1903561;	K03902	coagulation factor V [Source:MGISymbol;Acc:MGI:88382]
MGP_C57BL6NJ_G0017084	3838	105	2.2234	278	4.70846	231	2.76876	69	1.8775	67	1.84234	24	0.621623	1	175371088	175387428	+	3838	Slc19a2	GO:0005886;GO:0005886;GO:0005886;GO:0005886;GO:0005886;GO:0006810;GO:0015234;GO:0015234;GO:0015234;GO:0015234;GO:0015888;GO:0015888;GO:0015888;GO:0016020;GO:0016021;GO:0016021;GO:0051180;GO:0055085;GO:0071934;GO:0071934;GO:0090482;	K14610	solute carrier family 19 (thiamine transporter),member 2 [Source:MGI Symbol;Acc:MGI:1928761]
MGP_C57BL6NJ_G0017085	1909	144	6.13042	131	4.46071	38	0.915706	140	7.65876	157	8.6795	99	5.15525	1	175397602	175409864	+	1909	Ccdc181	GO:0002177;GO:0002177;GO:0005515;GO:0005737;GO:0005856;GO:0005874;GO:0005929;GO:0008017;GO:0008017;GO:0008150;GO:0031514;GO:0036126;GO:0036126;GO:0042995;	-	coiled-coil domain containing 181 [Source:MGISymbol;Acc:MGI:1922145]
MGP_C57BL6NJ_G0017086	5336	261	3.97519	389	4.73885	199	1.7156	261	5.10812	256	5.0632	249	4.63879	1	175411817	175430265	-	5336	Blzf1	GO:0000139;GO:0000139;GO:0005515;GO:0005634;GO:0005737;GO:0005794;GO:0005794;GO:0005794;GO:0005796;GO:0006810;GO:0007030;GO:0007030;GO:0007030;GO:0015031;GO:0016192;GO:0019899;GO:0031625;GO:0043001;GO:0043001;GO:0043001;	-	basic leucine zipper nuclear factor 1 [Source:MGISymbol;Acc:MGI:1201607]
MGP_C57BL6NJ_G0017087	5832	321	4.47323	253	2.81995	134	1.05698	133	2.38161	215	3.89065	126	2.1477	1	175426897	175564202	+	5832	Nme7	GO:0000166;GO:0004550;GO:0005524;GO:0005524;GO:0006165;GO:0006183;GO:0006228;GO:0006241;	K00940	NME/NM23 family member 7 [Source:MGISymbol;Acc:MGI:2449121]
MGP_C57BL6NJ_G0017088	3081	65	1.71457	83	1.75116	48	0.716684	14	0.47454	14	0.479554	4	0.129059	1	175563586	175584830	-	3081	Atp1b1	GO:0001666;GO:0001671;GO:0001671;GO:0005391;GO:0005391;GO:0005391;GO:0005515;GO:0005515;GO:0005524;GO:0005622;GO:0005886;GO:0005886;GO:0005886;GO:0005890;GO:0005890;GO:0005890;GO:0005890;GO:0005890;GO:0005901;GO:0006810;GO:0006811;GO:0006813;GO:0006813;GO:0006813;GO:0006814;GO:0006814;GO:0006814;GO:0006874;GO:0006874;GO:0006883;GO:0006883;GO:0007155;GO:0008022;GO:0008022;GO:0008144;GO:0010107;GO:…	K01540	ATPase, Na+/K+ transporting, beta 1 polypeptide[Source:MGI Symbol;Acc:MGI:88108]
MGP_C57BL6NJ_G0017089	1724	1	0.0471407	5	0.188526	0	0	0	0	0	0	3	0.172984	1	175956031	175983639	+	1724	Dpt	GO:0003674;GO:0005201;GO:0005576;GO:0005578;GO:0005615;GO:0005615;GO:0005615;GO:0007155;GO:0008285;GO:0008285;GO:0030199;GO:0030199;GO:0030199;GO:0031012;GO:0031012;GO:0062023;GO:0070062;	-	dermatopontin [Source:MGI Symbol;Acc:MGI:1928392]"
MGP_C57BL6NJ_G0017090	523	5	0.776966	0	0	0	0	10	1.9968	0	0	21	3.99152	1	176100272	176104155	-	523	Xcl1	GO:0001916;GO:0001916;GO:0002548;GO:0002690;GO:0002690;GO:0002725;GO:0002726;GO:0002726;GO:0002839;GO:0005125;GO:0005576;GO:0005576;GO:0005615;GO:0005615;GO:0005615;GO:0005615;GO:0005623;GO:0006935;GO:0006935;GO:0006935;GO:0006954;GO:0006955;GO:0007186;GO:0007267;GO:0008009;GO:0008009;GO:0008009;GO:0008009;GO:0008009;GO:0009615;GO:0010469;GO:0010820;GO:0010820;GO:0010820;GO:0010820;GO:0030593;GO:…	K05507	chemokine (C motif) ligand 1 [Source:MGISymbol;Acc:MGI:104593]
MGP_C57BL6NJ_G0017091	3192	0	0	0	0	0	0	0	0	0	0	0	0	1	176332947	176359118	-	3192	Tbx19	GO:0000978;GO:0000978;GO:0001077;GO:0001077;GO:0001158;GO:0001158;GO:0003677;GO:0003677;GO:0003677;GO:0003700;GO:0003700;GO:0003700;GO:0005515;GO:0005634;GO:0005634;GO:0006351;GO:0006355;GO:0006355;GO:0006355;GO:0006355;GO:0006366;GO:0021983;GO:0021983;GO:0042127;GO:0042127;GO:0045165;GO:0045165;GO:0045595;GO:0045595;GO:0045944;GO:0045944;GO:0045944;	K10184	T-box 19 [Source:MGI Symbol;Acc:MGI:1891158]"
MGP_C57BL6NJ_G0017092	5702	1427	20.339	1827	20.8281	4803	38.7493	830	15.2015	933	17.2685	907	15.8125	1	176370383	176390487	-	5702	Sft2d2	GO:0003674;GO:0006810;GO:0015031;GO:0016020;GO:0016020;GO:0016021;GO:0016021;GO:0016192;GO:0016192;GO:0070062;	-	SFT2 domain containing 2 [Source:MGISymbol;Acc:MGI:1917362]
MGP_C57BL6NJ_G0017093	5473	594	8.82053	476	5.65354	447	3.75717	302	5.76259	270	5.20642	310	5.63063	1	176412381	176443033	-	5473	Tiprl	GO:0000077;GO:0003674;GO:0005737;GO:0005829;GO:0007165;GO:0031929;GO:0032515;	K17607	TIP41, TOR signalling pathway regulator-like (S.cerevisiae) [Source:MGI Symbol;Acc:MGI:1915087]
MGP_C57BL6NJ_G0017094	6962	46	0.536979	110	1.02706	0	0	11	0.165004	0	0	0	0	1	176507772	176539892	+	6962	Gpr161	GO:0004871;GO:0004930;GO:0004930;GO:0005886;GO:0005929;GO:0007165;GO:0007186;GO:0007186;GO:0007189;GO:0007275;GO:0016020;GO:0016021;GO:0016021;GO:0030819;GO:0042995;GO:0055037;GO:0060170;GO:1901621;	K08439	G protein-coupled receptor 161 [Source:MGISymbol;Acc:MGI:2685054]
MGP_C57BL6NJ_G0017095	6144	520	6.87837	518	5.48046	235	1.75952	304	5.16724	264	4.53475	273	4.41705	1	176541843	176680154	-	6144	-	-	-	-
MGP_C57BL6NJ_G0017096	7344	140	1.54928	278	2.46066	723	4.52881	97	1.37935	122	1.75319	82	1.10995	1	176680316	176701976	+	7344	Mpc2	GO:0005739;GO:0006850;GO:0035774;GO:0050833;GO:0061732;	K22139	mitochondrial pyruvate carrier 2 [Source:MGISymbol;Acc:MGI:1917706]
MGP_C57BL6NJ_G0017097	8893	0	0	0	0	0	0	3	0.0352297	7	0.0830712	0	0	1	176705921	176802545	+	8893	Adcy10	GO:0000166;GO:0000287;GO:0003351;GO:0003351;GO:0004016;GO:0004016;GO:0004016;GO:0004016;GO:0005515;GO:0005524;GO:0005622;GO:0005634;GO:0005634;GO:0005737;GO:0005737;GO:0005737;GO:0005739;GO:0005829;GO:0005856;GO:0005886;GO:0005929;GO:0006171;GO:0006171;GO:0006171;GO:0007283;GO:0009190;GO:0015630;GO:0015630;GO:0016020;GO:0016020;GO:0016829;GO:0016849;GO:0030145;GO:0030424;GO:0030425;GO:0030426;GO:…	-	adenylate cyclase 10 [Source:MGISymbol;Acc:MGI:2660854]
MGP_C57BL6NJ_G0017098	3449	69	1.62588	111	2.09203	168	2.24075	4	0.121116	0	0	7	0.201756	1	176819205	176865226	-	3449	Mpzl1	GO:0005887;GO:0005925;GO:0007165;GO:0009986;GO:0016020;GO:0016020;GO:0016021;	K06770	myelin protein zero-like 1 [Source:MGISymbol;Acc:MGI:1915731]
MGP_C57BL6NJ_G0017099	10131	247	1.98143	368	2.36121	342	1.55293	296	3.05124	350	3.646	285	2.79649	1	176882525	176954032	-	10131	Rcsd1	GO:0003009;GO:0005575;GO:0051015;GO:0071474;	K18615	RCSD domain containing 1 [Source:MGISymbol;Acc:MGI:2676394]
MGP_C57BL6NJ_G0017100	2362	9824	338.02	13332	366.905	38346	746.824	9632	425.866	7724	345.114	11852	498.807	1	177017484	177028560	+	2362	Creg1	GO:0005576;GO:0005615;GO:0005667;GO:0006355;GO:0008134;GO:0040008;GO:0048037;GO:0070062;GO:0005667;GO:0006355;GO:0008134;	-	cellular repressor of E1A-stimulated genes 1[Source:MGI Symbol;Acc:MGI:1344382]
MGP_C57BL6NJ_G0017101	5329	0	0	0	0	4	0.0345297	24	0.470329	7	0.138629	34	0.634241	1	177041933	177139096	+	5329	Cd247	GO:0002250;GO:0002376;GO:0004888;GO:0005515;GO:0005515;GO:0005737;GO:0005886;GO:0007166;GO:0007166;GO:0016020;GO:0016020;GO:0016021;GO:0032623;GO:0032623;GO:0042101;GO:0042101;GO:0042105;GO:0042105;GO:0042802;GO:0042803;GO:0050852;GO:0050852;GO:0050852;GO:0051289;GO:0070207;GO:1990782;GO:2000010;GO:2000010;	-	CD247 antigen [Source:MGI Symbol;Acc:MGI:88334]"
MGP_C57BL6NJ_G0017102	16689	841	4.09543	894	3.48214	195	0.537505	678	4.24264	795	5.02733	625	3.72281	1	177126973	177267216	-	16689	Pou2f1	GO:0000976;GO:0000978;GO:0000979;GO:0000983;GO:0003677;GO:0003677;GO:0003677;GO:0003682;GO:0003700;GO:0003700;GO:0005102;GO:0005515;GO:0005634;GO:0005634;GO:0005634;GO:0005654;GO:0005667;GO:0005783;GO:0006351;GO:0006355;GO:0006355;GO:0010629;GO:0030910;GO:0043231;GO:0043565;GO:0043565;GO:0045892;GO:0045944;GO:0060235;GO:0090575;	K09364	POU domain, class 2, transcription factor 1[Source:MGI Symbol;Acc:MGI:101898]
MGP_C57BL6NJ_G0017103	4049	0	0	0	0	0	0	0	0	0	0	4	0.0982049	1	177367805	177398962	-	4049	Dusp27	GO:0005575;GO:0005737;GO:0006470;GO:0008138;GO:0016311;GO:0016791;GO:0030017;	K14165	dual specificity phosphatase 27 (putative)[Source:MGI Symbol;Acc:MGI:2685055]
MGP_C57BL6NJ_G0017104	2739	7	0.207701	0	0	0	0	2	0.0762561	2	0.0770617	2	0.072587	1	177401278	177441924	+	2739	Gpa33	GO:0016020;GO:0016021;	K06790	glycoprotein A33 (transmembrane) [Source:MGISymbol;Acc:MGI:1891703]
MGP_C57BL6NJ_G0017105	1733	0	0	0	0	0	0	0	0	0	0	1	0.0573617	1	177475001	177514431	-	1733	Mael	GO:0000122;GO:0000785;GO:0000902;GO:0001741;GO:0003677;GO:0003723;GO:0005515;GO:0005515;GO:0005634;GO:0005634;GO:0005634;GO:0005654;GO:0005737;GO:0005737;GO:0005829;GO:0006974;GO:0007129;GO:0007140;GO:0007140;GO:0007275;GO:0007283;GO:0007283;GO:0007283;GO:0008630;GO:0009566;GO:0010629;GO:0030154;GO:0030849;GO:0031047;GO:0033391;GO:0034587;GO:0034587;GO:0043046;GO:0043066;GO:0043186;GO:0043186;GO:…	K18411	maelstrom spermatogenic transposon silencer[Source:MGI Symbol;Acc:MGI:2138453]
MGP_C57BL6NJ_G0017106	8253	7	0.0689318	17	0.133899	0	0	0	0	0	0	2	0.0240901	1	177529810	177592939	+	8253	Ildr2	GO:0005783;GO:0005789;GO:0009749;GO:0009749;GO:0016020;GO:0016021;GO:0030073;GO:0030073;GO:0030154;GO:0030154;GO:0031016;GO:0031016;GO:0048873;GO:0048873;	-	immunoglobulin-like domain containing receptor 2[Source:MGI Symbol;Acc:MGI:1196370]
MGP_C57BL6NJ_G0017107	4129	168	3.30672	173	2.72358	476	5.30323	105	2.65571	152	3.88508	85	2.04642	1	177656207	177670742	+	4129	Tada1	GO:0000124;GO:0003713;GO:0003713;GO:0004402;GO:0004402;GO:0005634;GO:0005634;GO:0005654;GO:0005829;GO:0005925;GO:0006351;GO:0006355;GO:0006357;GO:0030914;GO:0043966;GO:0043966;GO:0070461;GO:1903506;GO:1903508;	K11317	transcriptional adaptor 1 [Source:MGISymbol;Acc:MGI:1196415]
MGP_C57BL6NJ_G0017108	9518	713	6.08804	1014	6.92518	1886	9.11537	674	7.39521	579	6.41998	520	5.43098	1	177661751	177686850	-	9518	Pogk	GO:0003676;GO:0003677;GO:0005622;GO:0006355;	-	pogo transposable element with KRAB domain[Source:MGI Symbol;Acc:MGI:1918842]
MGP_C57BL6NJ_G0017109	1744	0	0	0	0	2	0.0527548	0	0	0	0	0	0	1	177760084	177786441	-	1744	Gm4846	GO:0004497;GO:0004497;GO:0004499;GO:0004499;GO:0004499;GO:0005575;GO:0005783;GO:0005789;GO:0016020;GO:0016021;GO:0016491;GO:0031090;GO:0043231;GO:0050660;GO:0050661;GO:0055114;GO:0055114;	K00485	predicted gene 4846 [Source:MGISymbol;Acc:MGI:3643319]
MGP_C57BL6NJ_G0017110	3012	0	0	0	0	0	0	0	0	0	0	0	0	1	177916625	177935138	-	3012	Gm4847	GO:0004497;GO:0004497;GO:0004499;GO:0004499;GO:0004499;GO:0005575;GO:0005783;GO:0005789;GO:0016020;GO:0016021;GO:0016491;GO:0031090;GO:0043231;GO:0050660;GO:0050661;GO:0055114;GO:0055114;	K00485	predicted gene 4847 [Source:MGISymbol;Acc:MGI:3643320]
MGP_C57BL6NJ_G0017111	3065	0	0	0	0	0	0	0	0	0	0	0	0	1	177950848	177971035	-	3065	Fmo9	GO:0004497;GO:0004497;GO:0004499;GO:0004499;GO:0004499;GO:0005575;GO:0005783;GO:0005789;GO:0016020;GO:0016021;GO:0016491;GO:0031090;GO:0043231;GO:0050660;GO:0050661;GO:0055114;GO:0055114;	K00485	flavin containing monooxygenase 9 [Source:MGISymbol;Acc:MGI:3606068]
MGP_C57BL6NJ_G0017112	6325	193	2.47988	167	1.71631	92	0.669122	54	0.891599	41	0.684107	65	1.02158	1	178317600	178416481	+	6325	Fam78b	GO:0003674;GO:0005575;GO:0008150;	-	family with sequence similarity 78, member B[Source:MGI Symbol;Acc:MGI:2443050]
MGP_C57BL6NJ_G0017113	5479	942	13.9728	1060	12.576	1286	10.7974	376	7.16676	154	2.96634	203	3.68312	1	178564602	178639999	-	5479	Uck2	GO:0000166;GO:0004849;GO:0004849;GO:0005515;GO:0005524;GO:0005524;GO:0005829;GO:0005829;GO:0006206;GO:0006238;GO:0008152;GO:0016301;GO:0016301;GO:0016310;GO:0016310;GO:0016740;GO:0019206;GO:0019206;GO:0043097;GO:0043231;GO:0044206;GO:0044206;GO:0044211;	K00876	uridine-cytidine kinase 2 [Source:MGISymbol;Acc:MGI:1931744]
MGP_C57BL6NJ_G0017114	4694	478	8.27596	653	9.04292	1145	11.2212	308	6.85242	323	7.26207	388	8.21693	1	178663063	178688052	+	4694	Tmco1	GO:0000139;GO:0005262;GO:0005262;GO:0005262;GO:0005783;GO:0005783;GO:0005789;GO:0005794;GO:0006810;GO:0006811;GO:0006816;GO:0006983;GO:0006983;GO:0016020;GO:0016020;GO:0016021;GO:0030176;GO:0030176;GO:0030176;GO:0032469;GO:0032469;GO:0032469;GO:0070588;GO:0070588;GO:0070588;GO:0032469;GO:0070588;	K21891	transmembrane and coiled-coil domains 1 [Source:MGISymbol;Acc:MGI:1921173]
MGP_C57BL6NJ_G0017115	3383	1182	28.3955	1247	23.9609	3204	43.5681	721	22.2572	520	16.2219	610	17.9246	1	178703464	178725133	+	3383	Aldh9a1	GO:0008152;GO:0016491;GO:0016491;GO:0016620;GO:0055114;GO:0055114;	K00149	aldehyde dehydrogenase 9, subfamily A1 [Source:MGISymbol;Acc:MGI:1861622]
MGP_C57BL6NJ_G0017116	1097	67	4.96366	210	12.4438	2594	108.778	37	3.52234	52	5.00262	58	5.25584	1	178728567	178750255	-	1097	Mgst3	GO:0004364;GO:0004364;GO:0004464;GO:0004602;GO:0004602;GO:0005635;GO:0005783;GO:0005783;GO:0005789;GO:0006629;GO:0016020;GO:0016020;GO:0016021;GO:0016740;GO:0019370;GO:0031090;GO:0043231;GO:0043231;GO:0070062;GO:0098869;	K00799	microsomal glutathione S-transferase 3 [Source:MGISymbol;Acc:MGI:1913697]
MGP_C57BL6NJ_G0017117	1143	0	0	0	0	0	0	0	0	0	0	0	0	1	178800544	178821461	-	1143	Lrrc52	GO:0005249;GO:0005267;GO:0005267;GO:0005886;GO:0006810;GO:0006811;GO:0006813;GO:0006813;GO:0008076;GO:0016020;GO:0016021;GO:0022414;GO:0022414;GO:0044325;GO:0071805;GO:0099104;GO:1903818;	-	leucine rich repeat containing 52 [Source:MGISymbol;Acc:MGI:1924118]
MGP_C57BL6NJ_G0017118	1746	0	0	0	0	0	0	0	0	0	0	0	0	1	178958441	179004554	+	1746	Rxrg	GO:0000977;GO:0000977;GO:0003677;GO:0003677;GO:0003700;GO:0003707;GO:0004886;GO:0004886;GO:0005634;GO:0005634;GO:0005634;GO:0006351;GO:0006355;GO:0006355;GO:0008270;GO:0031641;GO:0043401;GO:0043401;GO:0043565;GO:0043565;GO:0043565;GO:0045944;GO:0045944;GO:0046872;GO:0048384;GO:0048384;GO:0051289;GO:0051289;GO:1901522;GO:1901522;	K08526	retinoid X receptor gamma [Source:MGISymbol;Acc:MGI:98216]
MGP_C57BL6NJ_G0017119	3396	0	0	0	0	0	0	0	0	0	0	0	0	1	179062453	179235735	+	3396	Lmx1a	GO:0000977;GO:0001228;GO:0001558;GO:0003677;GO:0003677;GO:0005634;GO:0006351;GO:0006355;GO:0006355;GO:0006366;GO:0007275;GO:0007411;GO:0007417;GO:0007420;GO:0007613;GO:0007626;GO:0010468;GO:0021542;GO:0021549;GO:0021766;GO:0021953;GO:0030182;GO:0030901;GO:0042048;GO:0043565;GO:0045665;GO:0045944;GO:0046872;GO:0050808;GO:0071542;GO:0090263;GO:1904948;GO:1905426;GO:0000977;GO:0001228;GO:0001558;GO:…	K09371	LIM homeobox transcription factor 1 alpha[Source:MGI Symbol;Acc:MGI:1888519]
MGP_C57BL6NJ_G0017120	13355	1161	7.06516	1382	6.72671	588	2.0254	255	1.99403	226	1.78593	256	1.90554	1	179526769	179853434	-	13355	Pbx1	GO:0000977;GO:0000978;GO:0001077;GO:0001077;GO:0001655;GO:0001658;GO:0003677;GO:0003677;GO:0003677;GO:0003700;GO:0005515;GO:0005515;GO:0005634;GO:0005634;GO:0005634;GO:0005654;GO:0005654;GO:0005667;GO:0005737;GO:0006351;GO:0006355;GO:0006355;GO:0006355;GO:0006366;GO:0006694;GO:0007275;GO:0007548;GO:0008134;GO:0008284;GO:0009887;GO:0009952;GO:0009954;GO:0010971;GO:0030154;GO:0030278;GO:0030325;GO:…	K09355	pre B cell leukemia homeobox 1 [Source:MGISymbol;Acc:MGI:97495]
MGP_C57BL6NJ_G0017121	6307	166	2.13904	254	2.61788	12	0.0875259	172	2.84801	176	2.94504	148	2.3327	1	180956207	180992908	-	6307	Nuf2	GO:0000278;GO:0000775;GO:0000775;GO:0000776;GO:0000776;GO:0000776;GO:0000777;GO:0000778;GO:0003674;GO:0005634;GO:0005634;GO:0005694;GO:0007049;GO:0007052;GO:0008608;GO:0016020;GO:0031262;GO:0031262;GO:0031262;GO:0031262;GO:0045132;GO:0051301;GO:0051315;GO:0051383;	K11548	NUF2, NDC80 kinetochore complex component[Source:MGI Symbol;Acc:MGI:1914227]
MGP_C57BL6NJ_G0017122	4546	33	0.589954	74	1.05814	0	0	17	0.390531	0	0	12	0.262405	1	181129857	181172328	+	4546	Rgs5	GO:0005096;GO:0005737;GO:0005737;GO:0005829;GO:0005886;GO:0007165;GO:0007186;GO:0009968;GO:0016020;GO:0043547;GO:1904706;	K16449	regulator of G-protein signaling 5 [Source:MGISymbol;Acc:MGI:1098434]
MGP_C57BL6NJ_G0017123	3103	25	0.654774	73	1.52925	0	0	5	0.168277	5	0.170055	0	0	1	181221884	181228034	-	3103	Rgs4	GO:0005096;GO:0007186;GO:0043547;	-	regulator of G-protein signaling 4 [Source:MGISymbol;Acc:MGI:108409]
MGP_C57BL6NJ_G0017124	1734	0	0	0	0	0	0	0	0	0	0	0	0	1	181426045	181435027	+	1734	Ccdc190	GO:0003674;GO:0005575;GO:0008150;	-	coiled-coil domain containing 190 [Source:MGISymbol;Acc:MGI:1925715]
MGP_C57BL6NJ_G0017125	5104	316	5.03164	383	4.87783	274	2.46955	69	1.41181	31	0.640991	64	1.24649	1	181451385	181471091	-	5104	Hsd17b7	GO:0000253;GO:0000253;GO:0000253;GO:0004303;GO:0005148;GO:0005783;GO:0005783;GO:0005886;GO:0006629;GO:0006694;GO:0006695;GO:0006695;GO:0006703;GO:0016020;GO:0016020;GO:0016021;GO:0016491;GO:0055114;GO:0000253;GO:0005783;GO:0006695;	K13373	hydroxysteroid (17-beta) dehydrogenase 7[Source:MGI Symbol;Acc:MGI:1330808]
MGP_C57BL6NJ_G0017126	8972	2268	20.5441	3241	23.4816	12	0.0615276	197	2.29305	46	0.54109	41	0.454271	1	181474157	181627258	-	8972	Ddr2	GO:0000166;GO:0001503;GO:0003416;GO:0003416;GO:0004672;GO:0004713;GO:0004713;GO:0004713;GO:0004714;GO:0004714;GO:0004714;GO:0004714;GO:0004888;GO:0005518;GO:0005518;GO:0005518;GO:0005518;GO:0005524;GO:0005524;GO:0005737;GO:0005886;GO:0005886;GO:0005887;GO:0005887;GO:0005925;GO:0006468;GO:0007169;GO:0007169;GO:0007169;GO:0008284;GO:0008284;GO:0009968;GO:0010763;GO:0010763;GO:0015629;GO:0016020;GO:…	K05125	discoidin domain receptor family, member 2[Source:MGI Symbol;Acc:MGI:1345277]
MGP_C57BL6NJ_G0017127	4011	342	6.92958	449	7.27667	438	5.02342	94	2.44744	246	6.47267	149	3.69279	1	181656322	181693198	-	4011	Uap1	GO:0008152;GO:0070569;	K00972	UDP-N-acetylglucosamine pyrophosphorylase 1[Source:MGI Symbol;Acc:MGI:1334459]
MGP_C57BL6NJ_G0017128	7944	3021	30.9062	3940	32.2401	2849	16.498	2358	30.9985	2409	32.0036	2482	31.0587	1	181714039	181736011	-	7944	Uhmk1	GO:0000166;GO:0000243;GO:0003676;GO:0003723;GO:0004672;GO:0004672;GO:0004674;GO:0004674;GO:0004674;GO:0004674;GO:0005515;GO:0005515;GO:0005524;GO:0005524;GO:0005634;GO:0005634;GO:0005654;GO:0005737;GO:0005737;GO:0005794;GO:0006468;GO:0007050;GO:0007050;GO:0008187;GO:0016301;GO:0016310;GO:0016607;GO:0016740;GO:0018105;GO:0018105;GO:0018105;GO:0019899;GO:0030424;GO:0030628;GO:0031175;GO:0032839;GO:…	-	U2AF homology motif (UHM) kinase 1 [Source:MGISymbol;Acc:MGI:1341908]
MGP_C57BL6NJ_G0017129	2523	0	0	0	0	0	0	0	0	0	0	0	0	1	181752589	181775952	+	2523	Sh2d1b2	GO:0002250;GO:0002376;GO:0005515;GO:0005575;GO:0005737;GO:0018108;GO:0018108;GO:0032814;GO:0032814;GO:0045087;GO:0045953;GO:0045953;GO:0045954;GO:0045954;GO:0050731;GO:0050731;	-	SH2 domain containing 1B2 [Source:MGISymbol;Acc:MGI:3622649]
MGP_C57BL6NJ_G0017130	2501	88	2.85958	38	0.987663	19	0.349477	39	1.6285	33	1.39252	31	1.23217	1	181800541	181813734	+	2501	Sh2d1b1	-	K07989	SH2 domain containing 1B1 [Source:MGISymbol;Acc:MGI:1349420]
MGP_C57BL6NJ_G0017131	3827	195	4.14104	373	6.33562	313	3.76239	85	2.31951	102	2.81282	122	3.169	1	181825148	181833261	-	3827	Gm7694	GO:0003674;GO:0005575;GO:0008150;	-	predicted gene 7694 [Source:MGISymbol;Acc:MGI:3649135]
MGP_C57BL6NJ_G0017132	6589	71	0.875734	122	1.20359	95	0.663258	27	0.427938	111	1.77789	43	0.648739	1	181829617	182141892	-	6589	Nos1ap	GO:0005739;GO:0005901;GO:0030018;GO:0030315;GO:0033017;GO:0050998;	K16513	nitric oxide synthase 1 (neuronal) adaptor protein[Source:MGI Symbol;Acc:MGI:1917979]
MGP_C57BL6NJ_G0017133	771	0	0	0	0	0	0	0	0	0	0	0	0	1	181835730	181839052	+	771	1700015E13Rik	GO:0003674;GO:0005634;GO:0007283;GO:0007283;GO:0007283;GO:0007342;GO:0007342;GO:0007342;GO:0016020;GO:0030154;GO:0031965;GO:0031965;GO:0031965;	-	RIKEN cDNA 1700015E13 gene [Source:MGISymbol;Acc:MGI:1924175]
MGP_C57BL6NJ_G0017134	3095	229	6.01324	426	8.94721	19	0.282404	24	0.809817	5	0.170494	16	0.513902	1	182201516	182239757	+	3095	Olfml2b	GO:0005576;GO:0005578;GO:0005578;GO:0005615;GO:0005615;GO:0030198;GO:0030198;GO:0031012;GO:0031012;GO:0050840;GO:0050840;	-	olfactomedin-like 2B [Source:MGISymbol;Acc:MGI:2443310]
MGP_C57BL6NJ_G0017135	9251	4266	37.4771	4107	28.8586	2860	14.2218	3080	34.7695	2952	33.6766	2945	31.6459	1	182263895	182442256	-	9251	Atf6	GO:0000976;GO:0000977;GO:0000977;GO:0000978;GO:0001654;GO:0001654;GO:0003677;GO:0003677;GO:0003700;GO:0003700;GO:0005515;GO:0005515;GO:0005634;GO:0005634;GO:0005634;GO:0005634;GO:0005634;GO:0005783;GO:0005783;GO:0005783;GO:0005789;GO:0005789;GO:0005794;GO:0006351;GO:0006355;GO:0006355;GO:0006986;GO:0007601;GO:0007601;GO:0016020;GO:0016020;GO:0016021;GO:0030176;GO:0030968;GO:0031625;GO:0035497;GO:…	K09054	activating transcription factor 6 [Source:MGISymbol;Acc:MGI:1926157]
MGP_C57BL6NJ_G0017136	2731	50	1.48793	62	1.47574	141	2.37507	26	0.994233	20	0.772875	20	0.727996	1	182455366	182481802	-	2731	Dusp12	GO:0004721;GO:0004721;GO:0004725;GO:0005634;GO:0005634;GO:0005737;GO:0005737;GO:0005829;GO:0006470;GO:0006470;GO:0006470;GO:0006470;GO:0008138;GO:0008138;GO:0008138;GO:0008270;GO:0008270;GO:0016311;GO:0016311;GO:0016787;GO:0016791;GO:0016791;GO:0019900;GO:0033133;GO:0033133;GO:0035335;GO:0046872;GO:0008138;	-	dual specificity phosphatase 12 [Source:MGISymbol;Acc:MGI:1890614]
MGP_C57BL6NJ_G0017137	817	0	0	9	0.716076	0	0	1	0.127825	0	0	0	0	1	182481327	182482143	+	817	Gm26620	-	-	predicted gene, 26620 [Source:MGISymbol;Acc:MGI:5477114]
MGP_C57BL6NJ_G0017138	1284	1	0.0632949	4	0.202504	10	0.358272	0	0	6	0.493159	1	0.0774205	1	182503405	182511432	-	1284	Fcrlb	GO:0003674;GO:0005737;GO:0005737;GO:0005783;GO:0050777;GO:0050777;	-	Fc receptor-like B [Source:MGISymbol;Acc:MGI:3576487]
MGP_C57BL6NJ_G0017139	1745	3	0.13972	6	0.223509	1	0.0263623	30	1.7954	13	0.786228	5	0.284836	1	182516067	182528877	-	1745	Fcrla	GO:0005515;GO:0005737;GO:0005737;GO:0030154;	-	Fc receptor-like A [Source:MGISymbol;Acc:MGI:2138647]
MGP_C57BL6NJ_G0017140	5639	1006	14.4987	1360	15.6775	2564	20.9167	2097	38.8358	1647	30.8242	1990	35.081	1	182563068	182581438	-	5639	Fcgr2b	GO:0016020;GO:0016021;	K12560	Fc receptor, IgG, low affinity IIb [Source:MGISymbol;Acc:MGI:95499]
MGP_C57BL6NJ_G0017141	1256	306	19.8	236	12.2141	1104	40.435	584	48.5579	566	47.5584	447	35.3784	1	182623845	182634676	+	1256	Fcgr4	GO:0005886;GO:0009897;GO:0009986;GO:0009986;GO:0009986;GO:0016020;GO:0016021;GO:0019767;GO:0019767;GO:0019770;GO:0019770;GO:0019863;GO:0019864;GO:0038094;GO:0038095;GO:0042119;GO:0042119;GO:0045780;GO:0045780;GO:0051930;GO:0070062;GO:0071222;	K06463	Fc receptor, IgG, low affinity IV [Source:MGISymbol;Acc:MGI:2179523]
MGP_C57BL6NJ_G0017142	1736	2993	140.117	4244	158.915	13428	355.828	3425	206.038	2716	165.113	4369	250.18	1	182662753	182707677	-	1736	Fcgr3	-	K16824	Fc receptor, IgG, low affinity III [Source:MGISymbol;Acc:MGI:95500]
MGP_C57BL6NJ_G0017143	1774	19	0.870429	11	0.403068	19	0.492695	15	0.883027	4	0.237962	7	0.392252	1	182772518	182786871	+	1774	Cfap126	GO:0005515;GO:0005737;GO:0005856;GO:0005886;GO:0005929;GO:0005929;GO:0016020;GO:0016324;GO:0016324;GO:0030030;GO:0036064;GO:0036064;GO:0036064;GO:0042995;GO:0044782;GO:0044782;GO:0044782;	-	cilia and flagella associated protein 126[Source:MGI Symbol;Acc:MGI:1922722]
MGP_C57BL6NJ_G0017144	3215	1124	28.4131	1758	35.5449	3934	56.29	809	26.2787	663	21.7637	778	24.0558	1	182787069	182810856	-	3215	Sdhc	GO:0000104;GO:0005739;GO:0005739;GO:0005739;GO:0005743;GO:0005749;GO:0005749;GO:0006099;GO:0006099;GO:0006121;GO:0006979;GO:0009055;GO:0009055;GO:0016020;GO:0016020;GO:0016021;GO:0016627;GO:0020037;GO:0020037;GO:0022900;GO:0045281;GO:0046872;GO:0048039;GO:0055114;	K00236	succinate dehydrogenase complex, subunit C,integral membrane protein [Source:MGISymbol;Acc:MGI:1913302]
MGP_C57BL6NJ_G0017145	2128	0	0	8	0.244375	11	0.237793	0	0	1	0.049594	13	0.607285	1	182810964	182821392	+	2128	Mpz	GO:0005887;GO:0016020;GO:0016020;GO:0016021;GO:0043209;	K06770	myelin protein zero [Source:MGISymbol;Acc:MGI:103177]
MGP_C57BL6NJ_G0017146	1577	54	2.78289	88	3.62735	18	0.525072	99	6.55601	91	6.0899	109	6.87093	1	182833508	182857637	-	1577	Pcp4l1	GO:0003674;GO:0005575;GO:0008150;	-	Purkinje cell protein 4-like 1 [Source:MGISymbol;Acc:MGI:1913675]
MGP_C57BL6NJ_G0017147	4414	3	0.055236	0	0	0	0	2	0.0473188	0	0	0	0	1	182878365	182885096	+	4414	Nr1i3	GO:0000976;GO:0000977;GO:0000977;GO:0000981;GO:0001228;GO:0003677;GO:0003677;GO:0003677;GO:0003677;GO:0003700;GO:0003707;GO:0004879;GO:0004887;GO:0005515;GO:0005515;GO:0005634;GO:0005634;GO:0005634;GO:0005634;GO:0005634;GO:0005654;GO:0005737;GO:0005737;GO:0005737;GO:0005829;GO:0005829;GO:0005856;GO:0006351;GO:0006355;GO:0006355;GO:0006355;GO:0006355;GO:0006366;GO:0007275;GO:0008134;GO:0008270;GO:…	K08541	nuclear receptor subfamily 1, group I, member 3[Source:MGI Symbol;Acc:MGI:1346307]
MGP_C57BL6NJ_G0017148	5135	127	2.01	322	4.07619	811	7.26538	101	2.05408	90	1.84971	161	3.11678	1	182880406	182886909	-	5135	Tomm40l	GO:0005739;GO:0005739;GO:0005739;GO:0005741;GO:0005741;GO:0005742;GO:0005742;GO:0006810;GO:0006811;GO:0008320;GO:0008320;GO:0015031;GO:0015266;GO:0015288;GO:0016020;GO:0016021;GO:0030150;GO:0030150;GO:0030943;GO:0032991;GO:0043234;GO:0046930;GO:0055085;GO:0070678;	K11518	translocase of outer mitochondrial membrane 40homolog-like (yeast) [Source:MGI Symbol;Acc:MGI:3589112]
MGP_C57BL6NJ_G0017149	537	0	0	3	0.36315	0	0	2	0.388949	7	1.3757	0	0	1	182889449	182890774	+	537	Apoa2	GO:0002740;GO:0005319;GO:0005543;GO:0005576;GO:0005576;GO:0005576;GO:0005615;GO:0005615;GO:0005829;GO:0006631;GO:0006656;GO:0006810;GO:0006869;GO:0006869;GO:0006869;GO:0006869;GO:0008035;GO:0008035;GO:0008035;GO:0008203;GO:0008203;GO:0008203;GO:0008289;GO:0008289;GO:0009395;GO:0009749;GO:0010873;GO:0010903;GO:0015485;GO:0015485;GO:0015759;GO:0017127;GO:0017127;GO:0018158;GO:0018206;GO:0030300;GO:…	K08758	apolipoprotein A-II [Source:MGISymbol;Acc:MGI:88050]
MGP_C57BL6NJ_G0017150	874	2451	227.911	3240	240.975	6730	354.227	3107	371.25	2777	335.324	3185	362.259	1	182893959	182898627	-	874	Fcer1g	GO:0001798;GO:0001805;GO:0001812;GO:0002283;GO:0002283;GO:0002292;GO:0002292;GO:0002376;GO:0002431;GO:0002431;GO:0002554;GO:0004888;GO:0005515;GO:0005515;GO:0005515;GO:0005886;GO:0005886;GO:0005886;GO:0005887;GO:0006911;GO:0007165;GO:0007166;GO:0007166;GO:0007229;GO:0009897;GO:0009897;GO:0009986;GO:0010543;GO:0010543;GO:0016020;GO:0016020;GO:0016021;GO:0016064;GO:0016064;GO:0019767;GO:0019767;GO:…	K07983	Fc receptor, IgE, high affinity I, gammapolypeptide [Source:MGI Symbol;Acc:MGI:95496]
MGP_C57BL6NJ_G0017151	2313	963	33.8364	1385	38.9236	6092	121.161	549	24.7875	536	24.4563	492	21.1451	1	182899115	182918945	-	2313	Ndufs2	GO:0005739;	-	NADH dehydrogenase (ubiquinone) Fe-S protein 2[Source:MGI Symbol;Acc:MGI:2385112]
MGP_C57BL6NJ_G0017152	4810	31	0.523781	133	1.7974	37	0.353863	18	0.390808	0	0	0	0	1	182917978	182928674	+	4810	Adamts4	GO:0004222;GO:0006508;GO:0008237;GO:0008270;GO:0046872;	K07764	a disintegrin-like and metallopeptidase (reprolysintype) with thrombospondin type 1 motif, 4 [Source:MGISymbol;Acc:MGI:1339949]
MGP_C57BL6NJ_G0017153	5454	67	0.998374	196	2.33604	409	3.44974	69	1.32121	42	0.812709	89	1.62217	1	182943675	182950287	+	5454	B4galt3	GO:0003831;GO:0003945;GO:0005794;GO:0005794;GO:0005829;GO:0005975;GO:0006486;GO:0006682;GO:0008378;GO:0016020;GO:0016021;GO:0016740;GO:0016757;GO:0016757;GO:0032580;GO:0046872;GO:0070062;	-	UDP-Gal:betaGlcNAc beta 1,4-galactosyltransferase,polypeptide 3 [Source:MGI Symbol;Acc:MGI:1928767]
MGP_C57BL6NJ_G0017154	4516	103	1.8536	190	2.73488	344	3.50415	73	1.68813	143	3.34182	136	2.99368	1	182949374	182954571	-	4516	Ppox	GO:0004729;GO:0005739;GO:0006783;GO:0031304;	K00231	protoporphyrinogen oxidase [Source:MGISymbol;Acc:MGI:104968]
MGP_C57BL6NJ_G0017155	4755	145	2.47828	394	5.38623	535	5.17585	177	3.8874	174	3.86189	224	4.68294	1	182955330	182961362	-	4755	Usp21	GO:0006511;GO:0016579;GO:0036459;	K21634	ubiquitin specific peptidase 21 [Source:MGISymbol;Acc:MGI:1353665]
MGP_C57BL6NJ_G0017156	2070	70	2.74828	245	7.69369	1535	34.1127	68	3.43064	71	3.61984	79	3.79383	1	182961934	182968643	-	2070	Ufc1	GO:0005737;GO:0034976;GO:0070062;GO:0071568;GO:0071568;GO:0071568;GO:0071569;GO:0071569;GO:1990592;GO:1990592;GO:1990592;	K12165	ubiquitin-fold modifier conjugating enzyme 1[Source:MGI Symbol;Acc:MGI:1913405]
MGP_C57BL6NJ_G0017157	5861	243	3.36952	330	3.66	449	3.52414	158	2.81528	205	3.69133	138	2.34061	1	183011932	183027968	+	5861	Dedd	GO:0003677;GO:0003677;GO:0003677;GO:0005515;GO:0005634;GO:0005730;GO:0005730;GO:0005730;GO:0005737;GO:0005737;GO:0006351;GO:0006355;GO:0006915;GO:0006915;GO:0008625;GO:0008625;GO:0008625;GO:0042177;GO:0042177;GO:0042981;GO:0046697;GO:0046697;GO:1901837;GO:1901837;	-	death effector domain-containing [Source:MGISymbol;Acc:MGI:1333874]
MGP_C57BL6NJ_G0017158	4900	121	2.00689	222	2.94507	409	3.83977	123	2.62147	134	2.88609	98	1.98816	1	183023645	183031251	-	4900	Nit1	GO:0005739;	-	nitrilase 1 [Source:MGI Symbol;Acc:MGI:1350916]"
MGP_C57BL6NJ_G0017159	1937	572	23.9994	543	18.2225	489	11.6133	419	22.5902	394	21.4668	366	18.7833	1	183031275	183044772	+	1937	Pfdn2	GO:0005634;GO:0005634;GO:0005737;GO:0005737;GO:0005737;GO:0005739;GO:0005739;GO:0005829;GO:0006457;GO:0006457;GO:0006457;GO:0006457;GO:0016272;GO:0044183;GO:0044183;GO:0051082;GO:0051495;GO:0070062;	K09549	prefoldin 2 [Source:MGI Symbol;Acc:MGI:1276111]"
MGP_C57BL6NJ_G0017160	1558	0	0	0	0	0	0	0	0	0	0	0	0	1	183043964	183046316	-	1558	Klhdc9	GO:0005575;GO:0008150;GO:0030332;	-	kelch domain containing 9 [Source:MGISymbol;Acc:MGI:1916124]
MGP_C57BL6NJ_G0017161	3746	34	0.73764	80	1.38823	158	1.94029	51	1.4218	62	1.74673	69	1.83106	1	183058166	183079424	+	3746	Nectin4	GO:0004872;GO:0005102;GO:0005886;GO:0005886;GO:0005887;GO:0005912;GO:0005912;GO:0005913;GO:0005913;GO:0007155;GO:0007155;GO:0007156;GO:0007157;GO:0008037;GO:0016020;GO:0016021;GO:0030054;GO:0038023;GO:0042802;GO:0042803;GO:0043296;GO:0046718;GO:0050839;GO:0070062;GO:0098609;	K06593	nectin cell adhesion molecule 4 [Source:MGISymbol;Acc:MGI:1918990]
MGP_C57BL6NJ_G0017162	8590	3072	29.0644	3864	29.2404	2345	12.5582	3846	46.7576	3958	48.6277	4199	48.593	1	183079780	183102941	+	8590	Arhgap30	-	K20645	Rho GTPase activating protein 30 [Source:MGISymbol;Acc:MGI:2684948]
MGP_C57BL6NJ_G0017163	2818	144	4.15293	344	7.93517	944	15.4102	156	5.78123	122	4.56898	146	5.1503	1	183103946	183111787	+	2818	Usf1	GO:0000432;GO:0000432;GO:0000790;GO:0001666;GO:0003677;GO:0003677;GO:0003690;GO:0003700;GO:0003705;GO:0005515;GO:0005634;GO:0005634;GO:0005654;GO:0005667;GO:0006006;GO:0006351;GO:0006355;GO:0006355;GO:0006366;GO:0009411;GO:0016589;GO:0019086;GO:0019899;GO:0019901;GO:0032869;GO:0042802;GO:0042803;GO:0042826;GO:0043425;GO:0043565;GO:0045893;GO:0045944;GO:0046982;GO:0046983;GO:0048188;GO:0055088;GO:…	-	upstream transcription factor 1 [Source:MGISymbol;Acc:MGI:99542]
MGP_C57BL6NJ_G0017164	867	0	0	1	0.0749756	0	0	0	0	0	0	0	0	1	183111517	183112997	+	867	Tstd1	GO:0005739;	K01013	thiosulfate sulfurtransferase (rhodanese)-likedomain containing 1 [Source:MGI Symbol;Acc:MGI:3648482]
MGP_C57BL6NJ_G0017165	2641	45	1.38477	48	1.18144	197	3.43144	27	1.06766	15	0.59941	6	0.225841	1	183132830	183160951	+	2641	F11r	GO:0001817;GO:0001817;GO:0005515;GO:0005886;GO:0005886;GO:0005911;GO:0005923;GO:0005923;GO:0005923;GO:0005923;GO:0007155;GO:0007155;GO:0016020;GO:0016021;GO:0030054;GO:0030165;GO:0030855;GO:0030855;GO:0031032;GO:0031410;GO:0034260;GO:0036057;GO:0043547;GO:0045296;GO:0045777;GO:0050892;GO:0050892;GO:0050892;GO:0050892;GO:0070062;GO:0072659;GO:0090557;GO:0090557;GO:0090559;GO:0090559;GO:0090559;GO:…	K06089	F11 receptor [Source:MGI Symbol;Acc:MGI:1321398]"
MGP_C57BL6NJ_G0017166	1264	86	5.52949	97	4.98843	46	1.67413	20	1.65242	34	2.83879	36	2.83124	1	183201894	183203157	+	1264	Alyref2	GO:0003676;GO:0003723;	K12881	Aly/REF export factor 2 [Source:MGISymbol;Acc:MGI:1913144]
MGP_C57BL6NJ_G0017167	1141	4	0.28491	1	0.0569709	2	0.0806348	1	0.0915273	0	0	4	0.348494	1	183222739	183235039	-	1141	Itln1	GO:0001934;GO:0001934;GO:0005509;GO:0005509;GO:0005576;GO:0005886;GO:0009624;GO:0009624;GO:0016020;GO:0030246;GO:0030246;GO:0031225;GO:0031526;GO:0031526;GO:0042802;GO:0043235;GO:0045121;GO:0045121;GO:0046326;GO:0046326;GO:0046872;GO:0062023;GO:0070062;GO:0070207;GO:0070492;GO:0070492;GO:0070492;	K17527	intelectin 1 (galactofuranose binding) [Source:MGISymbol;Acc:MGI:1333831]
MGP_C57BL6NJ_G0017168	4876	144	2.40012	155	2.06636	87	0.820793	82	1.75625	43	0.930691	51	1.03975	1	183259655	183322036	+	4876	Cd244	GO:0001773;GO:0001773;GO:0002250;GO:0002323;GO:0002323;GO:0002323;GO:0002376;GO:0004872;GO:0005515;GO:0005886;GO:0006955;GO:0007165;GO:0009897;GO:0009897;GO:0016020;GO:0016021;GO:0016021;GO:0032819;GO:0032819;GO:0038023;GO:0042288;GO:0045087;GO:0060732;GO:0071663;GO:1902715;GO:2000484;GO:2000566;GO:2000566;	K06582	CD244 natural killer cell receptor 2B4 [Source:MGISymbol;Acc:MGI:109294]
MGP_C57BL6NJ_G0017169	3307	3262	80.1647	3986	78.3505	11200	155.798	6784	214.234	6990	223.071	8436	253.585	1	183298817	183319700	-	3307	Ly9	GO:0002250;GO:0002376;GO:0005886;GO:0005886;GO:0007155;GO:0009986;GO:0009986;GO:0016020;GO:0016021;GO:0032740;GO:0045087;GO:0072540;	K06570	lymphocyte antigen 9 [Source:MGISymbol;Acc:MGI:96885]
MGP_C57BL6NJ_G0017170	1676	2270	110.074	2166	84.0085	3574	98.0977	2855	177.897	2887	181.791	3351	198.756	1	183347349	183361431	-	1676	Slamf7	GO:0016020;GO:0016021;	K06733	SLAM family member 7 [Source:MGISymbol;Acc:MGI:1922595]
MGP_C57BL6NJ_G0017171	1189	552	37.7303	630	34.4427	1324	51.2253	668	58.672	614	54.4988	610	50.9998	1	183398374	183424530	+	1189	Cd48	GO:0002819;GO:0003823;GO:0003823;GO:0004872;GO:0005515;GO:0005886;GO:0005886;GO:0007165;GO:0007165;GO:0009897;GO:0016020;GO:0016020;GO:0031225;GO:0032991;GO:0038023;GO:0042110;GO:0045121;GO:0045576;GO:0046658;GO:0070062;GO:0007165;GO:0009897;GO:0042110;	-	CD48 antigen [Source:MGI Symbol;Acc:MGI:88339]"
MGP_C57BL6NJ_G0017172	6144	0	0	0	0	0	0	0	0	1	0.0171771	7	0.113258	1	183485106	183525398	+	6144	Slamf1	GO:0001779;GO:0001779;GO:0001787;GO:0001787;GO:0002232;GO:0002232;GO:0002250;GO:0002277;GO:0002376;GO:0002725;GO:0002725;GO:0004872;GO:0004872;GO:0004872;GO:0005515;GO:0005515;GO:0005886;GO:0006909;GO:0007155;GO:0007165;GO:0009897;GO:0009897;GO:0009986;GO:0009986;GO:0009986;GO:0010759;GO:0010759;GO:0016020;GO:0016021;GO:0016021;GO:0031338;GO:0031338;GO:0032695;GO:0032715;GO:0032720;GO:0035744;GO:…	K06536	signaling lymphocytic activation molecule familymember 1 [Source:MGI Symbol;Acc:MGI:1351314]
MGP_C57BL6NJ_G0017173	4126	7808	153.796	7453	117.42	4024	44.8649	7216	182.643	9006	230.358	7723	186.071	1	183570421	183616879	+	4126	Cd84	-	-	CD84 antigen [Source:MGI Symbol;Acc:MGI:1336885]"
MGP_C57BL6NJ_G0017174	2528	871	28.0011	878	22.5765	33	0.600503	690	28.5042	1251	52.2253	796	31.3009	1	183624816	183627343	+	2528	Gm10521	GO:0003674;GO:0005575;GO:0008150;	-	predicted gene 10521 [Source:MGISymbol;Acc:MGI:3642358]
MGP_C57BL6NJ_G0017175	10831	7	0.0525246	11	0.0660181	93	0.394996	145	1.39809	135	1.31542	130	1.19315	1	183652514	183689653	+	10831	Slamf6	GO:0001779;GO:0001779;GO:0001787;GO:0001787;GO:0002250;GO:0002376;GO:0005886;GO:0005886;GO:0005887;GO:0016020;GO:0016021;GO:0032729;GO:0032740;GO:0045087;GO:0045954;GO:0070062;GO:0072540;	K16852	SLAM family member 6 [Source:MGISymbol;Acc:MGI:1353620]
MGP_C57BL6NJ_G0017176	6990	48	0.558081	44	0.40918	13	0.0855548	21	0.313746	26	0.392552	28	0.3982	1	183748070	183776359	-	6990	Vangl2	GO:0001569;GO:0001725;GO:0001736;GO:0001736;GO:0001843;GO:0001942;GO:0001947;GO:0003148;GO:0003149;GO:0003150;GO:0003347;GO:0003402;GO:0005515;GO:0005515;GO:0005515;GO:0005886;GO:0005886;GO:0005886;GO:0005911;GO:0005911;GO:0007266;GO:0007275;GO:0007275;GO:0009952;GO:0015012;GO:0016020;GO:0016021;GO:0016021;GO:0016021;GO:0016323;GO:0016324;GO:0016328;GO:0022007;GO:0030111;GO:0030134;GO:0032835;GO:…	K04510	vang-like 2 (van gogh, Drosophila) [Source:MGISymbol;Acc:MGI:2135272]
MGP_C57BL6NJ_G0017177	2442	0	0	0	0	0	0	0	0	0	0	0	0	1	183804166	183810821	-	2442	Nhlh1	GO:0000977;GO:0000977;GO:0000981;GO:0001228;GO:0003677;GO:0005634;GO:0005634;GO:0006351;GO:0006355;GO:0006357;GO:0006366;GO:0007275;GO:0030154;GO:0045944;GO:0046983;	K09075	nescient helix loop helix 1 [Source:MGISymbol;Acc:MGI:98481]
MGP_C57BL6NJ_G0017178	3975	1651	33.7554	3103	50.7439	4924	56.9848	1589	41.7468	1586	42.1082	1639	40.9886	1	183819410	183837671	-	3975	Ncstn	GO:0002262;GO:0004175;GO:0004175;GO:0005515;GO:0005515;GO:0005739;GO:0005764;GO:0005765;GO:0005783;GO:0005783;GO:0005794;GO:0005794;GO:0005886;GO:0005886;GO:0005887;GO:0005887;GO:0005887;GO:0005925;GO:0006509;GO:0006509;GO:0007219;GO:0007220;GO:0008233;GO:0016020;GO:0016020;GO:0016021;GO:0016021;GO:0016021;GO:0016485;GO:0016485;GO:0016485;GO:0016485;GO:0030659;GO:0031410;GO:0034205;GO:0034205;GO:…	-	nicastrin [Source:MGI Symbol;Acc:MGI:1891700]"
MGP_C57BL6NJ_G0017179	9427	4379	37.7516	5142	35.4566	12301	60.0268	3238	35.8707	3361	37.6267	3497	36.8759	1	183837405	183880311	+	9427	Copa	GO:0000139;GO:0005179;GO:0005198;GO:0005576;GO:0005615;GO:0005737;GO:0005737;GO:0005794;GO:0006810;GO:0006886;GO:0006886;GO:0006886;GO:0006888;GO:0006890;GO:0006891;GO:0010469;GO:0015031;GO:0016020;GO:0016020;GO:0016192;GO:0016192;GO:0030117;GO:0030126;GO:0030126;GO:0030126;GO:0030126;GO:0030157;GO:0030663;GO:0031410;GO:0070062;	K05236	coatomer protein complex subunit alpha [Source:MGISymbol;Acc:MGI:1334462]
MGP_C57BL6NJ_G0017180	3815	720	15.3381	576	9.81447	1521	18.3406	527	14.4262	366	10.1248	466	12.1426	1	183884742	183894465	+	3815	Pex19	GO:0005515;GO:0005515;GO:0005634;GO:0005654;GO:0005737;GO:0005737;GO:0005777;GO:0005777;GO:0005777;GO:0005778;GO:0005778;GO:0005778;GO:0005829;GO:0006625;GO:0007031;GO:0007031;GO:0007031;GO:0016020;GO:0016021;GO:0016557;GO:0016559;GO:0031526;GO:0032991;GO:0033328;GO:0036105;GO:0043234;GO:0045046;GO:0047485;GO:0050821;GO:0051117;GO:0061077;GO:0072321;GO:0072663;GO:1900131;	K13337	peroxisomal biogenesis factor 19 [Source:MGISymbol;Acc:MGI:1334458]
MGP_C57BL6NJ_G0017181	12996	1358	8.49227	1780	8.90326	2508	8.87761	1057	8.49379	1141	9.26567	1221	9.33957	1	183907297	183962904	+	12996	Dcaf8	GO:0003674;GO:0005634;GO:0005634;GO:0005654;GO:0005737;GO:0005737;GO:0005739;GO:0005829;GO:0008150;GO:0016567;GO:0080008;GO:0080008;	-	DDB1 and CUL4 associated factor 8 [Source:MGISymbol;Acc:MGI:91860]
MGP_C57BL6NJ_G0017182	3861	3690	77.6712	5540	93.2715	6355	75.7171	3723	100.7	3937	107.613	4425	113.929	1	183962627	183972693	-	3861	Pea15a	GO:0000077;GO:0005080;GO:0005515;GO:0005634;GO:0005737;GO:0005829;GO:0005875;GO:0006810;GO:0006915;GO:0006915;GO:0008643;GO:0035556;GO:0042981;GO:0046325;GO:0046325;GO:1902042;GO:1902043;GO:1902042;GO:1902043;	-	phosphoprotein enriched in astrocytes 15A[Source:MGI Symbol;Acc:MGI:104799]
MGP_C57BL6NJ_G0017183	1951	18	0.749806	6	0.199909	0	0	0	0	0	0	0	0	1	183975783	183987256	-	1951	Casq1	GO:0005509;GO:0005509;GO:0005509;GO:0005509;GO:0005509;GO:0005737;GO:0005739;GO:0005739;GO:0005739;GO:0005759;GO:0005759;GO:0005783;GO:0005783;GO:0005794;GO:0006937;GO:0007029;GO:0007029;GO:0009408;GO:0009408;GO:0010880;GO:0010880;GO:0014802;GO:0014804;GO:0014809;GO:0014809;GO:0014809;GO:0014809;GO:0016020;GO:0016529;GO:0016529;GO:0016529;GO:0030016;GO:0030018;GO:0030315;GO:0031674;GO:0033017;GO:…	-	calsequestrin 1 [Source:MGISymbol;Acc:MGI:1309468]
MGP_C57BL6NJ_G0017184	3667	0	0	0	0	0	0	1	0.028479	2	0.0575599	0	0	1	183993474	184028294	-	3667	Atp1a4	GO:0000166;GO:0000166;GO:0005391;GO:0005391;GO:0005391;GO:0005391;GO:0005391;GO:0005524;GO:0005524;GO:0005886;GO:0006810;GO:0006811;GO:0006813;GO:0006813;GO:0006814;GO:0006814;GO:0006814;GO:0006814;GO:0006883;GO:0007283;GO:0007283;GO:0009566;GO:0009566;GO:0010107;GO:0010248;GO:0015991;GO:0016020;GO:0016021;GO:0016021;GO:0016787;GO:0030007;GO:0030317;GO:0030317;GO:0030317;GO:0030641;GO:0030641;GO:…	K01539	ATPase, Na+/K+ transporting, alpha 4 polypeptide[Source:MGI Symbol;Acc:MGI:1351335]
MGP_C57BL6NJ_G0017186	7022	0	0	0	0	0	0	0	0	0	0	0	0	1	184041051	184067431	-	7022	Atp1a2	GO:0000166;GO:0000166;GO:0001504;GO:0001504;GO:0002026;GO:0002026;GO:0002087;GO:0002087;GO:0005391;GO:0005391;GO:0005391;GO:0005391;GO:0005515;GO:0005515;GO:0005515;GO:0005524;GO:0005524;GO:0005524;GO:0005737;GO:0005737;GO:0005768;GO:0005886;GO:0005886;GO:0005890;GO:0005901;GO:0006810;GO:0006811;GO:0006813;GO:0006813;GO:0006813;GO:0006814;GO:0006814;GO:0006814;GO:0006883;GO:0006883;GO:0006937;GO:…	K01539	ATPase, Na+/K+ transporting, alpha 2 polypeptide[Source:MGI Symbol;Acc:MGI:88106]
MGP_C57BL6NJ_G0017187	4288	0	0	4	0.0606379	0	0	0	0	0	0	0	0	1	184095195	184104012	-	4288	Kcnj9	GO:0005242;GO:0005242;GO:0005244;GO:0005886;GO:0005887;GO:0006810;GO:0006811;GO:0006813;GO:0006813;GO:0010107;GO:0015467;GO:0016020;GO:0016020;GO:0016021;GO:0016021;GO:0030165;GO:0034220;GO:0034765;GO:0071805;GO:0098655;	K05002	potassium inwardly-rectifying channel, subfamily J,member 9 [Source:MGI Symbol;Acc:MGI:108007]
MGP_C57BL6NJ_G0017188	5389	74	1.11598	83	1.00117	8	0.0682905	52	1.0077	61	1.1946	76	1.40193	1	184116961	184153987	+	5389	Kcnj10	GO:0000166;GO:0005102;GO:0005242;GO:0005242;GO:0005242;GO:0005242;GO:0005244;GO:0005267;GO:0005267;GO:0005515;GO:0005524;GO:0005886;GO:0005886;GO:0005886;GO:0005887;GO:0005887;GO:0005902;GO:0006810;GO:0006811;GO:0006813;GO:0006813;GO:0006813;GO:0006813;GO:0007601;GO:0007601;GO:0007628;GO:0007628;GO:0010107;GO:0010107;GO:0014003;GO:0014003;GO:0015272;GO:0016020;GO:0016020;GO:0016021;GO:0016021;GO:…	K05003	potassium inwardly-rectifying channel, subfamily J,member 10 [Source:MGI Symbol;Acc:MGI:1194504]
MGP_C57BL6NJ_G0017189	7554	399	4.29269	617	5.30942	518	3.1545	367	5.07371	302	4.21921	388	5.10594	1	184156448	184164001	+	7554	Pigm	GO:0000030;GO:0005575;GO:0005783;GO:0005789;GO:0006506;GO:0006506;GO:0006506;GO:0016020;GO:0016021;GO:0016021;GO:0016740;GO:0016757;GO:0016758;GO:0097502;	K05284	phosphatidylinositol glycan anchor biosynthesis,class M [Source:MGI Symbol;Acc:MGI:1914806]
MGP_C57BL6NJ_G0017190	1313	57	3.52812	32	1.58425	135	4.72985	109	8.66958	81	6.5106	79	5.98113	1	184270725	184273942	+	1313	Slamf9	GO:0016020;GO:0016021;	-	SLAM family member 9 [Source:MGISymbol;Acc:MGI:1923692]
MGP_C57BL6NJ_G0017191	6612	2	0.0245828	15	0.147468	12	0.0834885	1	0.0157944	18	0.287303	4	0.0601379	1	184277152	184294238	+	6612	Igsf9	GO:0005886;GO:0007156;GO:0007275;GO:0007399;GO:0016020;GO:0016021;GO:0016358;GO:0030054;GO:0030154;GO:0030424;GO:0030425;GO:0045202;GO:0050807;GO:0060077;GO:0098632;GO:0007156;GO:0016358;GO:0030424;GO:0030425;GO:0050807;GO:0060077;GO:0098632;	-	immunoglobulin superfamily, member 9 [Source:MGISymbol;Acc:MGI:2135283]
MGP_C57BL6NJ_G0017192	2082	3244	126.629	6706	209.373	10341	228.486	2444	122.591	1979	100.315	2715	129.631	1	184295407	184305052	+	2082	Tagln2	-	K20526	transgelin 2 [Source:MGI Symbol;Acc:MGI:1312985]"
MGP_C57BL6NJ_G0017193	5717	15	0.213234	39	0.44344	40	0.321862	21	0.383608	27	0.498421	31	0.539032	1	184318459	184343421	+	5717	Cfap45	-	-	cilia and flagella associated protein 45[Source:MGI Symbol;Acc:MGI:1919120]
MGP_C57BL6NJ_G0017194	1879	20	0.865041	49	1.69515	381	9.32774	84	4.66862	70	3.93162	87	4.60271	1	184354675	184362366	+	1879	Vsig8	GO:0005622;GO:0005622;GO:0005622;GO:0008150;GO:0016020;GO:0016021;	-	V-set and immunoglobulin domain containing 8[Source:MGI Symbol;Acc:MGI:3642995]
MGP_C57BL6NJ_G0017195	3079	304	8.02412	449	9.47928	1320	19.7216	876	29.7119	1020	34.9616	1050	33.9001	1	184381544	184391715	-	3079	Slamf8	GO:0016020;GO:0016021;	K16853	SLAM family member 8 [Source:MGISymbol;Acc:MGI:1921998]
MGP_C57BL6NJ_G0017196	2698	0	0	0	0	0	0	0	0	0	0	0	0	1	184399568	184405470	-	2698	Fcrl6	GO:0005886;GO:0005886;GO:0008150;GO:0009897;GO:0009897;GO:0016020;GO:0016021;GO:0019902;GO:0019903;GO:0019903;GO:0042289;	K17273	Fc receptor-like 6 [Source:MGISymbol;Acc:MGI:3618339]
MGP_C57BL6NJ_G0017197	1398	75	4.36001	269	12.5079	164	5.39653	76	5.67731	68	5.13337	141	10.0261	1	184435978	184438164	-	1398	Dusp23	GO:0004721;GO:0004722;GO:0004725;GO:0004725;GO:0004725;GO:0005634;GO:0005634;GO:0005654;GO:0005737;GO:0005737;GO:0005829;GO:0006470;GO:0008138;GO:0008138;GO:0008138;GO:0016311;GO:0016311;GO:0016311;GO:0016787;GO:0016791;GO:0016791;GO:0016791;GO:0035335;GO:0070062;	K14165	dual specificity phosphatase 23 [Source:MGISymbol;Acc:MGI:1915690]
MGP_C57BL6NJ_G0017198	3314	0	0	0	0	0	0	0	0	0	0	0	0	1	184503508	184648850	+	3314	Crp	GO:0001849;GO:0001849;GO:0005509;GO:0005576;GO:0005615;GO:0005615;GO:0006953;GO:0006958;GO:0006958;GO:0010628;GO:0010745;GO:0010888;GO:0010988;GO:0015485;GO:0030169;GO:0030169;GO:0030175;GO:0030426;GO:0032929;GO:0032930;GO:0042060;GO:0042802;GO:0042803;GO:0045087;GO:0045429;GO:0046872;GO:0050750;GO:0051258;GO:0070062;GO:0071277;GO:0097756;GO:1900006;GO:2000482;GO:2000482;	K16143	C-reactive protein, pentraxin-related [Source:MGISymbol;Acc:MGI:88512]
MGP_C57BL6NJ_G0017199	971	0	0	0	0	0	0	0	0	0	0	0	0	1	184709144	184710224	-	971	Apcs	GO:0001849;GO:0001849;GO:0005509;GO:0005576;GO:0005576;GO:0005615;GO:0005615;GO:0005634;GO:0006958;GO:0030169;GO:0030246;GO:0031012;GO:0032991;GO:0042802;GO:0044869;GO:0044871;GO:0045087;GO:0045087;GO:0045656;GO:0046597;GO:0046790;GO:0046872;GO:0048525;GO:0065003;GO:0070062;GO:0072562;GO:1903016;GO:1903019;	-	serum amyloid P-component [Source:MGISymbol;Acc:MGI:98229]
MGP_C57BL6NJ_G0017200	1436	0	0	0	0	0	0	0	0	0	0	0	0	1	184780190	184781625	+	1436	Olfr16	GO:0004871;GO:0004930;GO:0004930;GO:0004930;GO:0004984;GO:0004984;GO:0004993;GO:0005886;GO:0005887;GO:0007165;GO:0007186;GO:0007186;GO:0007186;GO:0007187;GO:0007268;GO:0007608;GO:0007608;GO:0016020;GO:0016021;GO:0016021;GO:0016021;GO:0030425;GO:0030594;GO:0050896;GO:0050911;GO:0098664;	K04257	olfactory receptor 16 [Source:MGISymbol;Acc:MGI:106648]
MGP_C57BL6NJ_G0017201	1262	0	0	0	0	0	0	0	0	0	0	0	0	1	184957523	184964556	-	1262	Olfr1408	GO:0004871;GO:0004888;GO:0004930;GO:0004930;GO:0004984;GO:0004984;GO:0005886;GO:0007165;GO:0007186;GO:0007186;GO:0007186;GO:0007186;GO:0007608;GO:0007608;GO:0016020;GO:0016021;GO:0016021;GO:0016021;GO:0016021;GO:0050896;GO:0050907;GO:0050911;	K04257	olfactory receptor 1408 [Source:MGISymbol;Acc:MGI:3031242]
MGP_C57BL6NJ_G0017202	1409	0	0	0	0	0	0	0	0	0	0	0	0	1	185004002	185011291	-	1409	Olfr1406	GO:0004871;GO:0004888;GO:0004930;GO:0004930;GO:0004984;GO:0004984;GO:0005886;GO:0007165;GO:0007186;GO:0007186;GO:0007186;GO:0007186;GO:0007608;GO:0007608;GO:0016020;GO:0016021;GO:0016021;GO:0016021;GO:0016021;GO:0050896;GO:0050907;GO:0050911;	K04257	olfactory receptor 1406 [Source:MGISymbol;Acc:MGI:3031240]
MGP_C57BL6NJ_G0017203	942	0	0	0	0	0	0	0	0	0	0	0	0	1	185023967	185024908	+	942	Olfr218	GO:0004871;GO:0004888;GO:0004930;GO:0004930;GO:0004984;GO:0004984;GO:0005886;GO:0007165;GO:0007186;GO:0007186;GO:0007186;GO:0007186;GO:0007608;GO:0007608;GO:0016020;GO:0016021;GO:0016021;GO:0016021;GO:0016021;GO:0050896;GO:0050907;GO:0050911;	K04257	olfactory receptor 218 [Source:MGISymbol;Acc:MGI:3030052]
MGP_C57BL6NJ_G0017204	1034	0	0	0	0	0	0	0	0	0	0	0	0	1	185036015	185037048	+	1034	Olfr1404	GO:0004871;GO:0004888;GO:0004930;GO:0004930;GO:0004984;GO:0004984;GO:0005886;GO:0007165;GO:0007186;GO:0007186;GO:0007186;GO:0007186;GO:0007608;GO:0007608;GO:0016020;GO:0016021;GO:0016021;GO:0016021;GO:0016021;GO:0050896;GO:0050907;GO:0050911;	K04257	olfactory receptor 1404 [Source:MGISymbol;Acc:MGI:3031238]
MGP_C57BL6NJ_G0017205	998	0	0	0	0	0	0	3	0.313926	0	0	3	0.298821	1	185041692	185049204	-	998	Fcer1a	GO:0000187;GO:0000187;GO:0001812;GO:0001812;GO:0001820;GO:0001820;GO:0005515;GO:0005622;GO:0005886;GO:0005887;GO:0005887;GO:0007165;GO:0007165;GO:0007166;GO:0007166;GO:0007257;GO:0007257;GO:0009897;GO:0009897;GO:0009986;GO:0016020;GO:0016021;GO:0019370;GO:0019370;GO:0019767;GO:0019767;GO:0019863;GO:0019863;GO:0019863;GO:0038095;GO:0043306;GO:0043306;GO:0045121;GO:0045401;GO:0045401;GO:0045425;GO:…	K08089	Fc receptor, IgE, high affinity I, alphapolypeptide [Source:MGI Symbol;Acc:MGI:95494]
MGP_C57BL6NJ_G0017206	991	0	0	0	0	0	0	0	0	0	0	0	0	1	185172386	185173376	+	991	Olfr418	GO:0004871;GO:0004930;GO:0004930;GO:0004984;GO:0004984;GO:0005886;GO:0007165;GO:0007186;GO:0007186;GO:0007608;GO:0016020;GO:0016021;GO:0016021;GO:0050896;GO:0050911;	K04257	olfactory receptor 418 [Source:MGISymbol;Acc:MGI:3030252]
MGP_C57BL6NJ_G0017207	1405	0	0	0	0	2	0.0654835	0	0	0	0	0	0	1	185235444	185237308	-	1405	Ackr1	-	K06574	atypical chemokine receptor 1 (Duffy blood group)[Source:MGI Symbol;Acc:MGI:1097689]
MGP_C57BL6NJ_G0017208	7114	1	0.011424	15	0.137062	0	0	7	0.102759	20	0.2967	29	0.405233	1	185236816	185274946	-	7114	Cadm3	GO:0004872;GO:0005102;GO:0005515;GO:0005886;GO:0005887;GO:0005911;GO:0005913;GO:0007155;GO:0007156;GO:0007157;GO:0008037;GO:0008104;GO:0016020;GO:0016021;GO:0030054;GO:0042803;GO:0050839;GO:0005911;GO:0007156;GO:0007157;GO:0008104;GO:0042803;	K06780	cell adhesion molecule 3 [Source:MGISymbol;Acc:MGI:2137858]
MGP_C57BL6NJ_G0017209	3501	710	16.4816	954	17.7131	327	4.29669	1091	32.5439	1342	40.454	1407	39.9506	1	185258101	185386443	+	3501	Aim2	GO:0002218;GO:0002218;GO:0002218;GO:0002230;GO:0002230;GO:0002376;GO:0003677;GO:0003690;GO:0003690;GO:0003690;GO:0005515;GO:0005634;GO:0005654;GO:0005737;GO:0005737;GO:0005737;GO:0005739;GO:0005829;GO:0005829;GO:0006915;GO:0006954;GO:0032088;GO:0032461;GO:0032731;GO:0032731;GO:0032731;GO:0033209;GO:0035458;GO:0035458;GO:0035690;GO:0042802;GO:0042802;GO:0042802;GO:0045087;GO:0050702;GO:0050718;GO:…	K12966	absent in melanoma 2 [Source:MGISymbol;Acc:MGI:2686159]
MGP_C57BL6NJ_G0017212	2425	33	1.10595	52	1.3939	11	0.20867	189	8.13929	301	13.0995	126	5.16511	1	185422075	185567291	-	2425	-	-	#N/A	-
MGP_C57BL6NJ_G0017213	3271	7004	174.02	4950	98.3702	1103	15.5122	15676	500.485	15267	492.577	14673	445.922	1	185706567	185724540	-	3271	AI607873	GO:0000122;GO:0000978;GO:0001047;GO:0001078;GO:0003690;GO:0003723;GO:0005634;GO:0005730;GO:0005829;GO:0008134;GO:0016020;GO:0042802;	K20914	expressed sequence AI607873 [Source:MGISymbol;Acc:MGI:2138302]
MGP_C57BL6NJ_G0017214	3130	3908	101.471	3386	70.3204	1748	25.6907	10389	346.63	10619	358.047	7043	223.684	1	185730024	185759522	-	3130	Ifi204	-	K20914	interferon activated gene 204 [Source:MGISymbol;Acc:MGI:96429]
MGP_C57BL6NJ_G0017215	4825	328	5.52472	249	3.3546	25	0.238353	1600	34.6305	1449	31.6936	1190	24.5172	1	185766457	186008411	-	4825	Ifi203	-	-	interferon activated gene 203 [Source:MGISymbol;Acc:MGI:96428]
MGP_C57BL6NJ_G0017216	2762	415	12.2112	410	9.64937	139	2.3151	1628	61.5555	1847	70.5739	1169	42.0738	1	185917675	185946529	-	2762	-	-	-	-
MGP_C57BL6NJ_G0017217	1697	5	0.239454	4	0.153221	5	0.13554	0	0	0	0	0	0	1	186027495	186042666	-	1697	Ifi202b	GO:0002376;GO:0003677;GO:0003690;GO:0003690;GO:0005515;GO:0005515;GO:0005634;GO:0005737;GO:0006954;GO:0035458;GO:0035458;GO:0043154;GO:0043154;GO:0045087;GO:0045824;	K12971	interferon activated gene 202B [Source:MGISymbol;Acc:MGI:1347083]
MGP_C57BL6NJ_G0017218	3891	341	7.1224	257	4.29349	204	2.41183	1293	34.7035	1204	32.6562	558	14.2559	1	186068896	186105573	-	3891	Ifi205	GO:0000122;GO:0000978;GO:0001047;GO:0001078;GO:0003690;GO:0003690;GO:0003723;GO:0005634;GO:0005634;GO:0005730;GO:0005829;GO:0006351;GO:0006355;GO:0008134;GO:0009617;GO:0009617;GO:0016020;GO:0035458;GO:0035458;GO:0042802;	-	interferon activated gene 205 [Source:MGISymbol;Acc:MGI:101847]
MGP_C57BL6NJ_G0017219	2406	0	0	0	0	0	0	0	0	0	0	0	0	1	186115995	186118449	+	2406	Olfr433	GO:0004871;GO:0004888;GO:0004930;GO:0004930;GO:0004984;GO:0004984;GO:0005886;GO:0007165;GO:0007186;GO:0007186;GO:0007186;GO:0007186;GO:0007608;GO:0007608;GO:0016020;GO:0016021;GO:0016021;GO:0016021;GO:0016021;GO:0050896;GO:0050907;GO:0050911;	K04257	olfactory receptor 433 [Source:MGISymbol;Acc:MGI:3030267]
MGP_C57BL6NJ_G0017220	939	0	0	0	0	0	0	0	0	0	0	0	0	1	186125289	186126227	+	939	Olfr432	GO:0004871;GO:0004888;GO:0004930;GO:0004930;GO:0004984;GO:0004984;GO:0005886;GO:0007165;GO:0007186;GO:0007186;GO:0007186;GO:0007186;GO:0007608;GO:0007608;GO:0016020;GO:0016021;GO:0016021;GO:0016021;GO:0016021;GO:0050896;GO:0050907;GO:0050911;	K04257	olfactory receptor 432 [Source:MGISymbol;Acc:MGI:3030266]
MGP_C57BL6NJ_G0017221	954	0	0	0	0	0	0	0	0	0	0	0	0	1	186147077	186148030	+	954	Olfr430	GO:0004871;GO:0004888;GO:0004930;GO:0004930;GO:0004984;GO:0004984;GO:0005886;GO:0007165;GO:0007186;GO:0007186;GO:0007186;GO:0007186;GO:0007608;GO:0007608;GO:0016020;GO:0016021;GO:0016021;GO:0016021;GO:0016021;GO:0050896;GO:0050907;GO:0050911;	K04257	olfactory receptor 430 [Source:MGISymbol;Acc:MGI:3030264]
MGP_C57BL6NJ_G0017222	1147	0	0	0	0	0	0	0	0	0	0	0	0	1	186160669	186166308	+	1147	Olfr429	GO:0004871;GO:0004930;GO:0004930;GO:0004984;GO:0004984;GO:0004984;GO:0005886;GO:0007165;GO:0007186;GO:0007186;GO:0007186;GO:0007186;GO:0007608;GO:0007608;GO:0007608;GO:0016020;GO:0016021;GO:0016021;GO:0016021;GO:0016021;GO:0050896;GO:0050911;	K04257	olfactory receptor 429 [Source:MGISymbol;Acc:MGI:3030263]
MGP_C57BL6NJ_G0017223	948	0	0	0	0	0	0	0	0	0	0	0	0	1	186181085	186182032	+	948	Olfr427	GO:0004871;GO:0004888;GO:0004930;GO:0004930;GO:0004984;GO:0004984;GO:0005886;GO:0007165;GO:0007186;GO:0007186;GO:0007186;GO:0007186;GO:0007608;GO:0007608;GO:0016020;GO:0016021;GO:0016021;GO:0016021;GO:0016021;GO:0050896;GO:0050907;GO:0050911;	K04257	olfactory receptor 427 [Source:MGISymbol;Acc:MGI:3030261]
MGP_C57BL6NJ_G0017224	924	0	0	0	0	0	0	0	0	0	0	0	0	1	186201813	186202736	-	924	Olfr231	GO:0004871;GO:0004888;GO:0004930;GO:0004930;GO:0004984;GO:0004984;GO:0005886;GO:0007165;GO:0007186;GO:0007186;GO:0007186;GO:0007186;GO:0007608;GO:0007608;GO:0016020;GO:0016021;GO:0016021;GO:0016021;GO:0016021;GO:0050896;GO:0050907;GO:0050911;	K04257	olfactory receptor 231 [Source:MGISymbol;Acc:MGI:3030065]
MGP_C57BL6NJ_G0017225	948	0	0	0	0	0	0	0	0	0	0	0	0	1	186226402	186227349	+	948	Olfr424	GO:0004871;GO:0004888;GO:0004930;GO:0004930;GO:0004984;GO:0004984;GO:0005886;GO:0007165;GO:0007186;GO:0007186;GO:0007186;GO:0007186;GO:0007608;GO:0007608;GO:0016020;GO:0016021;GO:0016021;GO:0016021;GO:0016021;GO:0050896;GO:0050907;GO:0050911;	K04257	olfactory receptor 424 [Source:MGISymbol;Acc:MGI:3030258]
MGP_C57BL6NJ_G0017226	1046	0	0	0	0	0	0	0	0	0	0	0	0	1	186256570	186257615	+	1046	Olfr420	GO:0004871;GO:0004888;GO:0004930;GO:0004930;GO:0004984;GO:0004984;GO:0005886;GO:0007165;GO:0007186;GO:0007186;GO:0007186;GO:0007186;GO:0007608;GO:0007608;GO:0016020;GO:0016021;GO:0016021;GO:0016021;GO:0016021;GO:0050896;GO:0050907;GO:0050911;	K04257	olfactory receptor 420 [Source:MGISymbol;Acc:MGI:3030254]
MGP_C57BL6NJ_G0017227	9691	14	0.117407	24	0.160984	5	0.0237345	7	0.0754338	14	0.152462	18	0.18464	1	186275849	186353238	+	9691	Spta1	GO:0002260;GO:0002260;GO:0003779;GO:0005509;GO:0005737;GO:0005856;GO:0005938;GO:0006779;GO:0006779;GO:0007009;GO:0007009;GO:0008091;GO:0008091;GO:0008360;GO:0008360;GO:0008360;GO:0009898;GO:0014731;GO:0014731;GO:0016020;GO:0016020;GO:0030036;GO:0030036;GO:0030097;GO:0030097;GO:0030424;GO:0030863;GO:0030863;GO:0032092;GO:0032092;GO:0032437;GO:0032437;GO:0042102;GO:0042102;GO:0046872;GO:0046982;GO:…	K06114	spectrin alpha, erythrocytic 1 [Source:MGISymbol;Acc:MGI:98385]
MGP_C57BL6NJ_G0017228	1088	0	0	0	0	0	0	0	0	0	0	0	0	1	186354677	186355764	-	1088	Olfr419	GO:0004871;GO:0004930;GO:0004930;GO:0004984;GO:0004984;GO:0004984;GO:0005886;GO:0007165;GO:0007186;GO:0007186;GO:0007186;GO:0007186;GO:0007608;GO:0007608;GO:0007608;GO:0016020;GO:0016021;GO:0016021;GO:0016021;GO:0016021;GO:0050896;GO:0050911;	K04257	olfactory receptor 419 [Source:MGISymbol;Acc:MGI:3030253]
MGP_C57BL6NJ_G0017229	794	0	0	0	0	0	0	0	0	0	0	0	0	1	186430462	186432807	+	794	-	-	-	-
MGP_C57BL6NJ_G0017230	798	0	0	0	0	0	0	0	0	0	0	0	0	1	186430462	186432811	+	798	-	-	-	-
MGP_C57BL6NJ_G0017231	930	0	0	0	0	0	0	0	0	0	0	0	0	1	186473498	186474427	+	930	Olfr417	GO:0004871;GO:0004930;GO:0004930;GO:0004984;GO:0004984;GO:0005886;GO:0007165;GO:0007186;GO:0007186;GO:0007186;GO:0007608;GO:0007608;GO:0016020;GO:0016021;GO:0016021;GO:0016021;GO:0050896;GO:0050911;	K04257	olfactory receptor 417 [Source:MGISymbol;Acc:MGI:3030251]
MGP_C57BL6NJ_G0017232	1010	0	0	0	0	0	0	0	0	0	0	0	0	1	186488554	186489563	+	1010	Olfr248	GO:0004871;GO:0004930;GO:0004930;GO:0004984;GO:0004984;GO:0005886;GO:0007165;GO:0007186;GO:0007186;GO:0007186;GO:0007608;GO:0007608;GO:0016020;GO:0016021;GO:0016021;GO:0016021;GO:0050896;GO:0050911;	K04257	olfactory receptor 248 [Source:MGISymbol;Acc:MGI:3030082]
MGP_C57BL6NJ_G0017233	1269	0	0	0	0	0	0	0	0	0	0	0	0	1	186513090	186525220	+	1269	Olfr414	GO:0004871;GO:0004930;GO:0004930;GO:0004984;GO:0004984;GO:0004984;GO:0005886;GO:0007165;GO:0007186;GO:0007186;GO:0007186;GO:0007186;GO:0007608;GO:0007608;GO:0007608;GO:0016020;GO:0016021;GO:0016021;GO:0016021;GO:0016021;GO:0050896;GO:0050911;	K04257	olfactory receptor 414 [Source:MGISymbol;Acc:MGI:3030248]
MGP_C57BL6NJ_G0017234	1534	0	0	0	0	0	0	0	0	0	0	0	0	1	186535928	186543253	+	1534	Olfr220	GO:0004871;GO:0004930;GO:0004930;GO:0004984;GO:0004984;GO:0004984;GO:0005886;GO:0007165;GO:0007186;GO:0007186;GO:0007186;GO:0007186;GO:0007608;GO:0007608;GO:0007608;GO:0016020;GO:0016021;GO:0016021;GO:0016021;GO:0016021;GO:0050896;GO:0050911;	K04257	olfactory receptor 220 [Source:MGISymbol;Acc:MGI:3030054]
MGP_C57BL6NJ_G0017235	7960	16	0.163358	19	0.15516	0	0	1	0.0131197	0	0	0	0	1	186603752	186955046	+	7960	Fmn2	GO:0003779;GO:0003779;GO:0005634;GO:0005730;GO:0005730;GO:0005737;GO:0005783;GO:0005783;GO:0005789;GO:0005789;GO:0005819;GO:0005819;GO:0005829;GO:0005829;GO:0005856;GO:0005884;GO:0005886;GO:0005902;GO:0005902;GO:0005938;GO:0005938;GO:0006810;GO:0006974;GO:0006974;GO:0007275;GO:0008017;GO:0015031;GO:0015629;GO:0015629;GO:0016020;GO:0016192;GO:0016192;GO:0016344;GO:0016344;GO:0030659;GO:0030659;GO:…	K02184	formin 2 [Source:MGI Symbol;Acc:MGI:1859252]"
MGP_C57BL6NJ_G0017236	3745	884	19.1838	1115	19.3536	11	0.13512	106	2.9559	7	0.197264	44	1.16794	1	186965601	187053368	-	3745	Grem2	GO:0005125;GO:0005576;GO:0005615;GO:0005615;GO:0007275;GO:0008201;GO:0008201;GO:0010172;GO:0010172;GO:0019221;GO:0019221;GO:0030514;GO:0030514;GO:0036122;GO:0036122;GO:0038098;GO:0038098;GO:0042802;GO:0042802;GO:0042803;GO:0042803;GO:0048263;GO:0048263;GO:0060300;GO:0060300;	-	gremlin 2, DAN family BMP antagonist [Source:MGISymbol;Acc:MGI:1344367]
MGP_C57BL6NJ_G0017237	6019	0	0	0	0	0	0	0	0	0	0	0	0	1	187167401	187579918	-	6019	Rgs7	GO:0001965;GO:0004871;GO:0005096;GO:0005096;GO:0005515;GO:0005622;GO:0005634;GO:0005635;GO:0005737;GO:0005737;GO:0005737;GO:0005829;GO:0005829;GO:0005834;GO:0005886;GO:0005886;GO:0007186;GO:0007186;GO:0008277;GO:0009968;GO:0016020;GO:0031681;GO:0032991;GO:0035556;GO:0043547;GO:0044292;GO:0045121;GO:1901381;	K16449	regulator of G protein signaling 7 [Source:MGISymbol;Acc:MGI:1346089]
MGP_C57BL6NJ_G0017238	3392	417	9.99111	566	10.8467	2095	28.4123	228	7.01965	133	4.13806	147	4.30807	1	187696137	187722344	-	3392	Fh1	GO:0003824;GO:0004333;GO:0004333;GO:0004333;GO:0004333;GO:0005737;GO:0005739;GO:0005739;GO:0005739;GO:0005739;GO:0006099;GO:0006099;GO:0006099;GO:0006099;GO:0006106;GO:0006106;GO:0006106;GO:0006108;GO:0006108;GO:0016829;GO:0016829;GO:0045239;GO:0048873;GO:0048873;GO:0070062;GO:0120162;GO:0120162;	K01679	fumarate hydratase 1 [Source:MGISymbol;Acc:MGI:95530]
MGP_C57BL6NJ_G0017239	4890	0	0	0	0	0	0	0	0	4	0.086328	0	0	1	187717090	187763763	+	4890	Kmo	GO:0004497;GO:0004502;GO:0004502;GO:0004502;GO:0004502;GO:0005615;GO:0005739;GO:0005739;GO:0005739;GO:0005741;GO:0005741;GO:0005741;GO:0005743;GO:0006569;GO:0006569;GO:0009435;GO:0009651;GO:0014049;GO:0016020;GO:0016021;GO:0016174;GO:0016174;GO:0016174;GO:0016491;GO:0019363;GO:0019674;GO:0019674;GO:0019674;GO:0019805;GO:0019805;GO:0031966;GO:0034276;GO:0034354;GO:0043420;GO:0044550;GO:0050660;GO:…	-	kynurenine 3-monooxygenase (kynurenine 3-hydroxylase) [Source:MGI Symbol;Acc:MGI:2138151]
MGP_C57BL6NJ_G0017240	1913	2	0.0849667	31	1.05338	51	1.2264	14	0.764275	0	0	26	1.35107	1	187764068	187794434	-	1913	Opn3	GO:0001750;GO:0004871;GO:0004930;GO:0004930;GO:0005887;GO:0007165;GO:0007186;GO:0007186;GO:0007186;GO:0007602;GO:0007602;GO:0008020;GO:0009584;GO:0009881;GO:0016020;GO:0016021;GO:0016021;GO:0018298;GO:0050896;GO:0071482;	K04256	opsin 3 [Source:MGI Symbol;Acc:MGI:1338022]"
MGP_C57BL6NJ_G0017241	6117	175	2.32505	297	3.15614	40	0.300815	106	1.80969	102	1.7598	154	2.50267	1	187783895	187790011	-	6117	Chml	GO:0005092;GO:0005096;GO:0005737;GO:0005968;GO:0005968;GO:0006886;GO:0007264;GO:0007264;GO:0017137;GO:0018344;GO:0018344;GO:0043547;GO:0050790;	-	choroideremia-like [Source:MGISymbol;Acc:MGI:101913]
MGP_C57BL6NJ_G0017242	3997	0	0	0	0	0	0	1	0.0261278	0	0	0	0	1	187800251	187929399	+	3997	Wdr64	-	-	WD repeat domain 64 [Source:MGISymbol;Acc:MGI:1923070]
MGP_C57BL6NJ_G0017243	8422	81	0.781634	86	0.663777	11	0.0600836	57	0.706799	104	1.30322	70	0.826235	1	187986173	188021371	+	8422	Exo1	GO:0000706;GO:0002376;GO:0002455;GO:0002455;GO:0002455;GO:0003677;GO:0003677;GO:0003677;GO:0003677;GO:0003682;GO:0003682;GO:0003682;GO:0003690;GO:0003824;GO:0004518;GO:0004518;GO:0004519;GO:0004527;GO:0005634;GO:0005634;GO:0005654;GO:0005886;GO:0006139;GO:0006281;GO:0006281;GO:0006298;GO:0006298;GO:0006298;GO:0006310;GO:0006310;GO:0006310;GO:0006974;GO:0008409;GO:0016446;GO:0016446;GO:0016446;GO:…	K10746	exonuclease 1 [Source:MGI Symbol;Acc:MGI:1349427]"
MGP_C57BL6NJ_G0017244	1799	0	0	0	0	0	0	0	0	0	0	0	0	1	188028211	188030107	+	1799	Gm38100	GO:0000045;GO:0000407;GO:0005515;GO:0005622;GO:0005737;GO:0006914;GO:0006914;GO:0006914;GO:0006914;GO:0006995;GO:0008333;GO:0008333;GO:0008333;GO:0019898;GO:0031410;GO:0032258;GO:0032403;GO:0032403;GO:0034271;GO:0034272;GO:0042593;GO:0042593;GO:0044804;GO:0044877;GO:0044877;GO:0045324;GO:1990172;GO:1990172;GO:1990172;GO:1990172;	-	predicted gene, 38100 [Source:MGISymbol;Acc:MGI:5611328]
MGP_C57BL6NJ_G0017245	10094	0	0	1	0.00643985	0	0	0	0	0	0	0	0	1	188074788	188419583	-	10094	Pld5	GO:0003674;GO:0003824;GO:0005575;GO:0008150;GO:0016020;GO:0016021;	K16861	phospholipase D family, member 5 [Source:MGISymbol;Acc:MGI:2442056]
MGP_C57BL6NJ_G0017246	17791	4129	18.8616	4351	15.8975	406	1.04979	2990	17.5512	3445	20.4357	2799	15.6395	1	188915489	189001169	-	17791	Cep170	GO:0003674;GO:0005515;GO:0005737;GO:0005813;GO:0005814;GO:0005814;GO:0005819;GO:0005829;GO:0005856;GO:0005874;GO:0005886;GO:0008150;GO:0031965;GO:0120103;	K16463	centrosomal protein 170 [Source:MGISymbol;Acc:MGI:1918348]
MGP_C57BL6NJ_G0017247	4129	671	13.2072	683	10.7526	118	1.31467	663	16.7689	822	21.0101	555	13.3619	1	189001762	189210553	+	4129	Sdccag8	GO:0001764;GO:0005737;GO:0005813;GO:0005814;GO:0030010;GO:0031023;GO:0034451;GO:0035148;	-	serologically defined colon cancer antigen 8[Source:MGI Symbol;Acc:MGI:1924066]
MGP_C57BL6NJ_G0017248	4968	1479	24.1947	1519	19.8754	640	5.9262	1100	23.1232	1299	27.5949	1158	23.1712	1	189210189	189458695	-	4968	Akt3	GO:0000002;GO:0000166;GO:0001938;GO:0004672;GO:0004672;GO:0004674;GO:0004674;GO:0004674;GO:0004674;GO:0005080;GO:0005515;GO:0005524;GO:0005524;GO:0005524;GO:0005622;GO:0005634;GO:0005737;GO:0005886;GO:0006468;GO:0006468;GO:0007165;GO:0010765;GO:0016020;GO:0016301;GO:0016310;GO:0016740;GO:0018105;GO:0018105;GO:0018107;GO:0032008;GO:0032869;GO:0035556;GO:0035556;GO:0043536;GO:0045766;GO:0045793;GO:…	K04456	thymoma viral proto-oncogene 3 [Source:MGISymbol;Acc:MGI:1345147]
MGP_C57BL6NJ_G0017249	5263	1204	18.592	1203	14.8584	480	4.19552	1156	22.9383	1103	22.1179	1020	19.2658	1	189650408	189657498	+	5263	Zbtb18	GO:0000122;GO:0000122;GO:0001701;GO:0003676;GO:0003677;GO:0003713;GO:0005634;GO:0005634;GO:0005634;GO:0005654;GO:0006351;GO:0006355;GO:0006974;GO:0007275;GO:0007519;GO:0015630;GO:0021549;GO:0021766;GO:0021987;GO:0043565;GO:0043565;GO:0045171;GO:0045892;GO:0045944;GO:0046872;GO:0048666;GO:0048872;GO:0051302;	-	zinc finger and BTB domain containing 18[Source:MGI Symbol;Acc:MGI:1353609]
MGP_C57BL6NJ_G0017250	768	0	0	0	0	0	0	0	0	0	0	0	0	1	189927168	189951071	+	768	1700016C15Rik	GO:0003674;GO:0005575;GO:0008150;	-	RIKEN cDNA 1700016C15 gene [Source:MGISymbol;Acc:MGI:1916678]
MGP_C57BL6NJ_G0017251	4531	1674	30.0258	1945	27.9039	966	9.80757	1021	23.5325	1087	25.3184	1024	22.4661	1	189958024	189991514	-	4531	Adss	GO:0000166;GO:0000287;GO:0004019;GO:0004019;GO:0004019;GO:0004019;GO:0004019;GO:0004019;GO:0005525;GO:0005525;GO:0005737;GO:0005737;GO:0005737;GO:0005829;GO:0005829;GO:0005886;GO:0006164;GO:0006164;GO:0006164;GO:0006164;GO:0006167;GO:0006167;GO:0006167;GO:0006531;GO:0016874;GO:0044208;GO:0044208;GO:0046040;GO:0046040;GO:0046872;GO:0070062;	K01939	adenylosuccinate synthetase, non muscle [Source:MGISymbol;Acc:MGI:87948]
MGP_C57BL6NJ_G0017252	8837	563	5.1777	663	4.87694	408	2.1239	382	4.51435	266	3.17671	441	4.96083	1	190226614	190537279	+	8837	Desi2	GO:0003674;GO:0005737;GO:0005737;GO:0006508;GO:0008150;GO:0008233;GO:0016787;GO:0036459;GO:0061578;GO:0061578;GO:0070536;GO:0071108;GO:1990380;GO:1990380;GO:0005737;	-	desumoylating isopeptidase 2 [Source:MGISymbol;Acc:MGI:1926075]
MGP_C57BL6NJ_G0017253	883	849	78.1413	702	51.6791	7	0.364683	624	73.8007	453	54.1425	553	62.2566	1	190609740	190613303	+	883	Cox20	GO:0005739;	K18184	COX20 Cox2 chaperone [Source:MGISymbol;Acc:MGI:1913609]
MGP_C57BL6NJ_G0017254	3030	0	0	0	0	0	0	0	0	0	0	0	0	1	190613684	190628338	-	3030	-	-	K12888	-
MGP_C57BL6NJ_G0017255	8959	1187	10.7677	1686	12.2331	145	0.744538	866	10.0947	1231	14.501	930	10.3192	1	190614953	190628407	-	8959	Hnrnpu	GO:0000122;GO:0000122;GO:0000166;GO:0000228;GO:0000228;GO:0000381;GO:0000381;GO:0000775;GO:0000776;GO:0000776;GO:0000777;GO:0000922;GO:0000978;GO:0000978;GO:0000993;GO:0000993;GO:0001047;GO:0001047;GO:0001097;GO:0001097;GO:0001649;GO:0003677;GO:0003677;GO:0003682;GO:0003682;GO:0003690;GO:0003690;GO:0003697;GO:0003697;GO:0003714;GO:0003714;GO:0003723;GO:0003723;GO:0003723;GO:0003725;GO:0003725;GO:…	K12888	heterogeneous nuclear ribonucleoprotein U[Source:MGI Symbol;Acc:MGI:1858195]
MGP_C57BL6NJ_G0017256	4144	61	1.19631	41	0.643136	8	0.0888073	61	1.53726	40	1.01869	29	0.695663	1	190711094	190798347	+	4144	Efcab2	-	-	EF-hand calcium binding domain 2 [Source:MGISymbol;Acc:MGI:1915476]
MGP_C57BL6NJ_G0017257	14696	613	3.38996	882	3.90129	34	0.106429	99	0.703514	11	0.078994	11	0.0744071	1	190847565	191283766	+	14696	Kif26b	GO:0022409;GO:0030010;GO:0072092;	K10404	kinesin family member 26B [Source:MGISymbol;Acc:MGI:2447076]
MGP_C57BL6NJ_G0017258	9184	121	1.07075	262	1.85442	399	1.99857	114	1.29631	114	1.31001	128	1.38548	1	191296526	191893270	-	9184	Smyd3	GO:0000978;GO:0000978;GO:0000979;GO:0000979;GO:0000993;GO:0000993;GO:0001162;GO:0001162;GO:0005515;GO:0005634;GO:0005634;GO:0005634;GO:0005654;GO:0005737;GO:0005829;GO:0006325;GO:0006334;GO:0006334;GO:0006469;GO:0006469;GO:0008168;GO:0014904;GO:0014904;GO:0016569;GO:0016740;GO:0018024;GO:0018024;GO:0018024;GO:0018024;GO:0032259;GO:0033138;GO:0033138;GO:0034968;GO:0034968;GO:0045184;GO:0045184;GO:…	K11426	SET and MYND domain containing 3 [Source:MGISymbol;Acc:MGI:1916976]
MGP_C57BL6NJ_G0017259	1905	385	16.4248	462	15.7647	166	4.00859	199	10.9092	148	8.19913	155	8.08831	1	191903515	191935512	-	1905	Tfb2m	GO:0000154;GO:0000179;GO:0000179;GO:0000179;GO:0003712;GO:0003712;GO:0003723;GO:0003723;GO:0005739;GO:0005739;GO:0005739;GO:0005739;GO:0005759;GO:0005759;GO:0006351;GO:0006355;GO:0006355;GO:0006364;GO:0006390;GO:0006390;GO:0006391;GO:0006391;GO:0006391;GO:0008168;GO:0008649;GO:0016740;GO:0030054;GO:0031167;GO:0031167;GO:0031167;GO:0032259;GO:0042645;GO:0045893;GO:0045893;	K17653	transcription factor B2, mitochondrial [Source:MGISymbol;Acc:MGI:107937]
MGP_C57BL6NJ_G0017260	8859	239	2.19254	487	3.57341	403	2.09266	165	1.94507	201	2.39449	209	2.34521	1	191935615	192016614	+	8859	Cnst	GO:0005794;GO:0005802;GO:0005802;GO:0005802;GO:0005886;GO:0005886;GO:0010923;GO:0010923;GO:0016020;GO:0016020;GO:0016021;GO:0019902;GO:0019902;GO:0030133;GO:0030133;GO:0031410;GO:0032991;GO:0042998;GO:0042998;GO:0042998;GO:0043231;GO:0043234;GO:0071253;GO:0071253;GO:0071253;	K17581	consortin, connexin sorting protein [Source:MGISymbol;Acc:MGI:2445141]
MGP_C57BL6NJ_G0017261	7562	156	1.67657	168	1.44415	238	1.44783	65	0.897663	57	0.795498	56	0.73616	1	192060261	192099728	+	7562	Sccpdh	GO:0003674;GO:0005634;GO:0005739;GO:0005739;GO:0005739;GO:0005811;GO:0005811;GO:0005886;GO:0008150;GO:0009247;GO:0016020;GO:0016020;GO:0016021;GO:0016491;GO:0016491;GO:0030496;GO:0055114;GO:0055114;	-	saccharopine dehydrogenase (putative) [Source:MGISymbol;Acc:MGI:1924486]
MGP_C57BL6NJ_G0017262	3449	0	0	0	0	0	0	0	0	0	0	0	0	1	192089486	192160543	-	3449	Gm1305	GO:0000166;GO:0003774;GO:0003777;GO:0005524;GO:0005524;GO:0007018;GO:0008017;	-	predicted gene 1305 [Source:MGISymbol;Acc:MGI:2686151]
MGP_C57BL6NJ_G0017263	15108	1591	8.55848	1966	8.45893	766	2.33238	835	5.77186	1114	7.78178	933	6.13897	1	192160252	192219478	-	15108	Ahctf1	GO:0000775;GO:0000776;GO:0000777;GO:0000777;GO:0000785;GO:0000785;GO:0000910;GO:0003677;GO:0003700;GO:0003700;GO:0005634;GO:0005634;GO:0005643;GO:0005643;GO:0005654;GO:0005694;GO:0005737;GO:0005737;GO:0005737;GO:0006351;GO:0006355;GO:0006355;GO:0006810;GO:0007049;GO:0007275;GO:0015031;GO:0016363;GO:0016363;GO:0016363;GO:0030097;GO:0031080;GO:0031080;GO:0031965;GO:0032465;GO:0032465;GO:0051028;GO:…	-	AT hook containing transcription factor 1[Source:MGI Symbol;Acc:MGI:1915033]
MGP_C57BL6NJ_G0017264	1301	0	0	3	0.149893	0	0	0	0	0	0	0	0	1	192219174	192220474	+	1301	Gm10518	GO:0003674;GO:0005575;GO:0008150;	-	predicted gene 10518 [Source:MGISymbol;Acc:MGI:3704205]
MGP_C57BL6NJ_G0017265	21530	2583	9.75021	2681	8.09453	107	0.228622	327	1.58613	145	0.710763	118	0.544827	1	192386542	192603400	+	21530	Cdc42bpa	GO:0000166;GO:0000226;GO:0000287;GO:0004672;GO:0004674;GO:0004674;GO:0004674;GO:0005515;GO:0005524;GO:0005524;GO:0005524;GO:0005622;GO:0005737;GO:0005911;GO:0006468;GO:0006468;GO:0006468;GO:0007010;GO:0007097;GO:0016301;GO:0016310;GO:0016477;GO:0016740;GO:0030027;GO:0030036;GO:0031032;GO:0031252;GO:0031532;GO:0035556;GO:0042641;GO:0042802;GO:0042995;GO:0046872;GO:0051056;GO:0070062;	K16307	CDC42 binding protein kinase alpha [Source:MGISymbol;Acc:MGI:2441841]
MGP_C57BL6NJ_G0017266	5293	514	7.89214	887	10.8933	6824	59.3083	151	2.97928	90	1.79449	163	3.0613	1	192603027	192638402	-	5293	Coq8a	GO:0000166;GO:0005524;GO:0005739;GO:0005739;GO:0005739;GO:0005739;GO:0006468;GO:0006744;GO:0006744;GO:0006744;GO:0006744;GO:0016020;GO:0016021;GO:0016301;GO:0016301;GO:0016301;GO:0016310;GO:0016310;GO:0016740;GO:0031314;GO:0043531;GO:0043531;GO:0005739;	K08869	coenzyme Q8A [Source:MGI Symbol;Acc:MGI:1914676]"
MGP_C57BL6NJ_G0017267	4332	552	10.3558	999	14.9905	4963	52.7028	389	9.37773	554	13.4965	578	13.2636	1	192666604	192703332	-	4332	Psen2	-	K04522	presenilin 2 [Source:MGI Symbol;Acc:MGI:109284]"
MGP_C57BL6NJ_G0017268	10451	1111	8.63952	1921	11.9484	3785	16.6604	1035	10.3423	1262	12.7439	1151	10.9481	1	192774377	192872710	+	10451	Itpkb	GO:0000165;GO:0000165;GO:0000166;GO:0001932;GO:0001932;GO:0002262;GO:0002262;GO:0005524;GO:0005634;GO:0005634;GO:0005829;GO:0005829;GO:0007166;GO:0007166;GO:0008440;GO:0008440;GO:0016020;GO:0016020;GO:0016301;GO:0016301;GO:0016310;GO:0016740;GO:0030217;GO:0030217;GO:0032957;GO:0032957;GO:0032958;GO:0033030;GO:0033030;GO:0035726;GO:0035726;GO:0045059;GO:0045059;GO:0045061;GO:0045061;GO:0045638;GO:…	K00911	inositol 1,4,5-trisphosphate 3-kinase B [Source:MGISymbol;Acc:MGI:109235]
MGP_C57BL6NJ_G0017269	6552	17	0.210867	19	0.188503	185	1.2989	30	0.478172	7	0.112752	22	0.333787	1	192880294	192936064	-	6552	Stum	GO:0003674;GO:0005575;GO:0008150;GO:0016020;GO:0016021;	-	mechanosensory transduction mediator [Source:MGISymbol;Acc:MGI:2138735]
MGP_C57BL6NJ_G0017270	4888	1104	18.3557	1702	22.6343	2082	19.5942	786	16.793	1018	21.9795	987	20.0727	1	193023717	193062584	+	4888	Parp1	GO:0003677;GO:0003950;GO:0003950;GO:0005634;GO:0006366;GO:0006471;GO:0008270;GO:0016740;GO:0016757;GO:0051287;	-	poly (ADP-ribose) polymerase family, member 1[Source:MGI Symbol;Acc:MGI:1340806]
[truncated: 19,397 more rows]
