# Supplementary material for: LncRNA-mRNA Expression Profiles of Osteoclast After Conditional Knockout HIF-1α
Source: Front Genet. 2022 Jun 21;13:909095. doi: 10.3389/fgene.2022.909095 (PMC9253292; doi:10.3389/fgene.2022.909095)
Supplement: Supplementary file 9 [file Table5.XLSX]

## Sheet: Sheet1
Category	GO.ID	Term	list	Total	Pvalue	FDR	Gene
BP	GO:0071354	cellular response to interleukin-6	3	22	6.1e-05	0.116505	MGP_C57BL6NJ_G0016210(St18),MGP_C57BL6NJ_G0016617(Pid1),MGP_C57BL6NJ_G0021322(Il6st)
BP	GO:0070741	response to interleukin-6	3	25	9e-05	0.116505	MGP_C57BL6NJ_G0016210(St18),MGP_C57BL6NJ_G0016617(Pid1),MGP_C57BL6NJ_G0021322(Il6st)
BP	GO:1900024	regulation of substrate adhesion-dependent cell spreading	3	45	0.00053	0.199691	MGP_C57BL6NJ_G0020849(Rreb1),MGP_C57BL6NJ_G0028281(Ap1ar),MGP_C57BL6NJ_G0034792(Nrp1)
BP	GO:0070102	interleukin-6-mediated signaling pathway	2	11	0.00065	0.199691	MGP_C57BL6NJ_G0016210(St18),MGP_C57BL6NJ_G0021322(Il6st)
BP	GO:0050855	regulation of B cell receptor signaling pathway	2	13	0.00092	0.199691	MGP_C57BL6NJ_G0024287(Plcl2),MGP_C57BL6NJ_G0033450(Prkcb)
MF	GO:0097493	structural molecule activity conferring elasticity	2	13	0.00096	0.199691	MGP_C57BL6NJ_G0024409(Myom1),MGP_C57BL6NJ_G0031664(Mfap5)
MF	GO:0035091	phosphatidylinositol binding	5	214	0.00099	0.199691	MGP_C57BL6NJ_G0019711(Pitpnc1),MGP_C57BL6NJ_G0022301(Asap1),MGP_C57BL6NJ_G0022940(Snx29),MGP_C57BL6NJ_G0026118(Dennd1a),MGP_C57BL6NJ_G0029285(Epb41)
BP	GO:0034446	substrate adhesion-dependent cell spreading	3	76	0.00241	0.199691	MGP_C57BL6NJ_G0020849(Rreb1),MGP_C57BL6NJ_G0028281(Ap1ar),MGP_C57BL6NJ_G0034792(Nrp1)
BP	GO:0010829	negative regulation of glucose transport	2	21	0.00244	0.199691	MGP_C57BL6NJ_G0016617(Pid1),MGP_C57BL6NJ_G0033450(Prkcb)
MF	GO:0001228	transcriptional activator activity, RNA polymerase II transcription regulatory region sequence-specific binding	6	396	0.00284	0.199691	MGP_C57BL6NJ_G0016210(St18),MGP_C57BL6NJ_G0016429(Satb2),MGP_C57BL6NJ_G0020351(Batf),MGP_C57BL6NJ_G0020849(Rreb1),MGP_C57BL6NJ_G0026135(Zeb2),MGP_C57BL6NJ_G0035015(Fli1)
CC	GO:0005622	intracellular	51	11939	0.003	0.199691	MGP_C57BL6NJ_G0016210(St18),MGP_C57BL6NJ_G0016429(Satb2),MGP_C57BL6NJ_G0016617(Pid1),MGP_C57BL6NJ_G0016967(Trove2),MGP_C57BL6NJ_G0016986(Fam129a),MGP_C57BL6NJ_G0017366(Cd34),MGP_C57BL6NJ_G0018428(Tns3),MGP_C57BL6NJ_G0018462(Lgalsl),MGP_C57BL6NJ_G0019711(Pitpnc1),MGP_C57BL6NJ_G0019782(Armc7),MGP_C57BL6NJ_G0020259(Gphn),MGP_C57BL6NJ_G0020351(Batf),MGP_C57BL6NJ_G0020402(Efcab11),MGP_C57BL6NJ_G002084…
CC	GO:0005900	oncostatin-M receptor complex	1	1	0.0034	0.199691	MGP_C57BL6NJ_G0021322(Il6st)
CC	GO:0036053	glomerular endothelium fenestra	1	1	0.0034	0.199691	MGP_C57BL6NJ_G0017366(Cd34)
BP	GO:0001985	negative regulation of heart rate involved in baroreceptor response to increased systemic arterial blood pressure	1	1	0.00351	0.199691	MGP_C57BL6NJ_G0021900(Adra1a)
BP	GO:0018315	molybdenum incorporation into molybdenum-molybdopterin complex	1	1	0.00351	0.199691	MGP_C57BL6NJ_G0020259(Gphn)
BP	GO:0035408	histone H3-T6 phosphorylation	1	1	0.00351	0.199691	MGP_C57BL6NJ_G0033450(Prkcb)
BP	GO:0035759	mesangial cell-matrix adhesion	1	1	0.00351	0.199691	MGP_C57BL6NJ_G0017366(Cd34)
BP	GO:0038189	neuropilin signaling pathway	1	1	0.00351	0.199691	MGP_C57BL6NJ_G0034792(Nrp1)
BP	GO:0038190	VEGF-activated neuropilin signaling pathway	1	1	0.00351	0.199691	MGP_C57BL6NJ_G0034792(Nrp1)
BP	GO:0042040	metal incorporation into metallo-molybdopterin complex	1	1	0.00351	0.199691	MGP_C57BL6NJ_G0020259(Gphn)
BP	GO:0060980	cell migration involved in coronary vasculogenesis	1	1	0.00351	0.199691	MGP_C57BL6NJ_G0034792(Nrp1)
BP	GO:0061441	renal artery morphogenesis	1	1	0.00351	0.199691	MGP_C57BL6NJ_G0034792(Nrp1)
BP	GO:0072579	glycine receptor clustering	1	1	0.00351	0.199691	MGP_C57BL6NJ_G0020259(Gphn)
BP	GO:1900035	negative regulation of cellular response to heat	1	1	0.00351	0.199691	MGP_C57BL6NJ_G0017366(Cd34)
BP	GO:1902378	VEGF-activated neuropilin signaling pathway involved in axon guidance	1	1	0.00351	0.199691	MGP_C57BL6NJ_G0034792(Nrp1)
BP	GO:1902748	positive regulation of lens fiber cell differentiation	1	1	0.00351	0.199691	MGP_C57BL6NJ_G0026135(Zeb2)
BP	GO:1903691	positive regulation of wound healing, spreading of epidermal cells	1	1	0.00351	0.199691	MGP_C57BL6NJ_G0020849(Rreb1)
BP	GO:1905040	otic placode development	1	1	0.00351	0.199691	MGP_C57BL6NJ_G0034792(Nrp1)
MF	GO:0034336	misfolded RNA binding	1	1	0.00357	0.199691	MGP_C57BL6NJ_G0016967(Trove2)
MF	GO:0035403	histone kinase activity (H3-T6 specific)	1	1	0.00357	0.199691	MGP_C57BL6NJ_G0033450(Prkcb)
MF	GO:0061598	molybdopterin adenylyltransferase activity	1	1	0.00357	0.199691	MGP_C57BL6NJ_G0020259(Gphn)
MF	GO:0061599	molybdopterin molybdotransferase activity	1	1	0.00357	0.199691	MGP_C57BL6NJ_G0020259(Gphn)
MF	GO:0000978	RNA polymerase II core promoter proximal region sequence-specific DNA binding	6	427	0.00411	0.199691	MGP_C57BL6NJ_G0016210(St18),MGP_C57BL6NJ_G0016429(Satb2),MGP_C57BL6NJ_G0020351(Batf),MGP_C57BL6NJ_G0020849(Rreb1),MGP_C57BL6NJ_G0035015(Fli1),MGP_C57BL6NJ_G0035508(Rfx7)
BP	GO:0022604	regulation of cell morphogenesis	6	437	0.00423	0.199691	MGP_C57BL6NJ_G0020849(Rreb1),MGP_C57BL6NJ_G0024850(Csnk1g3),MGP_C57BL6NJ_G0026135(Zeb2),MGP_C57BL6NJ_G0028281(Ap1ar),MGP_C57BL6NJ_G0029285(Epb41),MGP_C57BL6NJ_G0034792(Nrp1)
BP	GO:0046627	negative regulation of insulin receptor signaling pathway	2	28	0.00432	0.199691	MGP_C57BL6NJ_G0016617(Pid1),MGP_C57BL6NJ_G0033450(Prkcb)
MF	GO:0000987	core promoter proximal region sequence-specific DNA binding	6	436	0.00455	0.199691	MGP_C57BL6NJ_G0016210(St18),MGP_C57BL6NJ_G0016429(Satb2),MGP_C57BL6NJ_G0020351(Batf),MGP_C57BL6NJ_G0020849(Rreb1),MGP_C57BL6NJ_G0035015(Fli1),MGP_C57BL6NJ_G0035508(Rfx7)
MF	GO:0001159	core promoter proximal region DNA binding	6	436	0.00455	0.199691	MGP_C57BL6NJ_G0016210(St18),MGP_C57BL6NJ_G0016429(Satb2),MGP_C57BL6NJ_G0020351(Batf),MGP_C57BL6NJ_G0020849(Rreb1),MGP_C57BL6NJ_G0035015(Fli1),MGP_C57BL6NJ_G0035508(Rfx7)
BP	GO:0032502	developmental process	28	5107	0.00459	0.199691	MGP_C57BL6NJ_G0016429(Satb2),MGP_C57BL6NJ_G0016617(Pid1),MGP_C57BL6NJ_G0016967(Trove2),MGP_C57BL6NJ_G0017366(Cd34),MGP_C57BL6NJ_G0018428(Tns3),MGP_C57BL6NJ_G0020351(Batf),MGP_C57BL6NJ_G0020849(Rreb1),MGP_C57BL6NJ_G0021322(Il6st),MGP_C57BL6NJ_G0021900(Adra1a),MGP_C57BL6NJ_G0021906(Ppp2r2a),MGP_C57BL6NJ_G0021963(Itm2b),MGP_C57BL6NJ_G0022290(Nsmce2),MGP_C57BL6NJ_G0022301(Asap1),MGP_C57BL6NJ_G0022517…
BP	GO:0001881	receptor recycling	2	30	0.00495	0.199691	MGP_C57BL6NJ_G0024426(Ehd3),MGP_C57BL6NJ_G0028281(Ap1ar)
BP	GO:1900026	positive regulation of substrate adhesion-dependent cell spreading	2	31	0.00528	0.199691	MGP_C57BL6NJ_G0020849(Rreb1),MGP_C57BL6NJ_G0034792(Nrp1)
BP	GO:1900077	negative regulation of cellular response to insulin stimulus	2	31	0.00528	0.199691	MGP_C57BL6NJ_G0016617(Pid1),MGP_C57BL6NJ_G0033450(Prkcb)
BP	GO:0032228	regulation of synaptic transmission, GABAergic	2	32	0.00562	0.199691	MGP_C57BL6NJ_G0021900(Adra1a),MGP_C57BL6NJ_G0024287(Plcl2)
BP	GO:0071398	cellular response to fatty acid	2	33	0.00597	0.199691	MGP_C57BL6NJ_G0016617(Pid1),MGP_C57BL6NJ_G0021587(Ptger2)
MF	GO:0008289	lipid binding	7	616	0.00621	0.199691	MGP_C57BL6NJ_G0019711(Pitpnc1),MGP_C57BL6NJ_G0022301(Asap1),MGP_C57BL6NJ_G0022940(Snx29),MGP_C57BL6NJ_G0024426(Ehd3),MGP_C57BL6NJ_G0026118(Dennd1a),MGP_C57BL6NJ_G0026261(Atp5g3),MGP_C57BL6NJ_G0029285(Epb41)
BP	GO:0048518	positive regulation of biological process	27	4967	0.00644	0.199691	MGP_C57BL6NJ_G0016210(St18),MGP_C57BL6NJ_G0016429(Satb2),MGP_C57BL6NJ_G0016617(Pid1),MGP_C57BL6NJ_G0016986(Fam129a),MGP_C57BL6NJ_G0017366(Cd34),MGP_C57BL6NJ_G0018428(Tns3),MGP_C57BL6NJ_G0020351(Batf),MGP_C57BL6NJ_G0020849(Rreb1),MGP_C57BL6NJ_G0021322(Il6st),MGP_C57BL6NJ_G0021587(Ptger2),MGP_C57BL6NJ_G0021878(Hmbox1),MGP_C57BL6NJ_G0021900(Adra1a),MGP_C57BL6NJ_G0022290(Nsmce2),MGP_C57BL6NJ_G0022301…
MF	GO:0032266	phosphatidylinositol-3-phosphate binding	2	34	0.00655	0.199691	MGP_C57BL6NJ_G0022301(Asap1),MGP_C57BL6NJ_G0026118(Dennd1a)
MF	GO:0003690	double-stranded DNA binding	8	790	0.00682	0.199691	MGP_C57BL6NJ_G0016210(St18),MGP_C57BL6NJ_G0016429(Satb2),MGP_C57BL6NJ_G0020351(Batf),MGP_C57BL6NJ_G0020849(Rreb1),MGP_C57BL6NJ_G0021878(Hmbox1),MGP_C57BL6NJ_G0022517(Mkl1),MGP_C57BL6NJ_G0035015(Fli1),MGP_C57BL6NJ_G0035508(Rfx7)
CC	GO:0005825	half bridge of spindle pole body	1	2	0.0069	0.199691	MGP_C57BL6NJ_G0020402(Efcab11)
CC	GO:0097636	intrinsic component of autophagosome membrane	1	2	0.0069	0.199691	MGP_C57BL6NJ_G0021924(Gm21685)
CC	GO:0097637	integral component of autophagosome membrane	1	2	0.0069	0.199691	MGP_C57BL6NJ_G0021924(Gm21685)
BP	GO:0001920	negative regulation of receptor recycling	1	2	0.00701	0.199691	MGP_C57BL6NJ_G0028281(Ap1ar)
BP	GO:0001983	baroreceptor response to increased systemic arterial blood pressure	1	2	0.00701	0.199691	MGP_C57BL6NJ_G0021900(Adra1a)
BP	GO:0001994	norepinephrine-epinephrine vasoconstriction involved in regulation of systemic arterial blood pressure	1	2	0.00701	0.199691	MGP_C57BL6NJ_G0021900(Adra1a)
BP	GO:0002337	B-1a B cell differentiation	1	2	0.00701	0.199691	MGP_C57BL6NJ_G0024287(Plcl2)
BP	GO:0007529	establishment of synaptic specificity at neuromuscular junction	1	2	0.00701	0.199691	MGP_C57BL6NJ_G0020259(Gphn)
BP	GO:0021649	vestibulocochlear nerve structural organization	1	2	0.00701	0.199691	MGP_C57BL6NJ_G0034792(Nrp1)
BP	GO:0021767	mammillary body development	1	2	0.00701	0.199691	MGP_C57BL6NJ_G0026135(Zeb2)
BP	GO:0035441	cell migration involved in vasculogenesis	1	2	0.00701	0.199691	MGP_C57BL6NJ_G0034792(Nrp1)
BP	GO:0038154	interleukin-11-mediated signaling pathway	1	2	0.00701	0.199691	MGP_C57BL6NJ_G0021322(Il6st)
BP	GO:0038165	oncostatin-M-mediated signaling pathway	1	2	0.00701	0.199691	MGP_C57BL6NJ_G0021322(Il6st)
BP	GO:0044467	glial cell-derived neurotrophic factor secretion	1	2	0.00701	0.199691	MGP_C57BL6NJ_G0017366(Cd34)
BP	GO:0048203	vesicle targeting, trans-Golgi to endosome	1	2	0.00701	0.199691	MGP_C57BL6NJ_G0028281(Ap1ar)
BP	GO:0061373	mammillary axonal complex development	1	2	0.00701	0.199691	MGP_C57BL6NJ_G0026135(Zeb2)
BP	GO:0061552	ganglion morphogenesis	1	2	0.00701	0.199691	MGP_C57BL6NJ_G0034792(Nrp1)
BP	GO:0070104	negative regulation of interleukin-6-mediated signaling pathway	1	2	0.00701	0.199691	MGP_C57BL6NJ_G0021322(Il6st)
BP	GO:0070106	interleukin-27-mediated signaling pathway	1	2	0.00701	0.199691	MGP_C57BL6NJ_G0021322(Il6st)
BP	GO:0090298	negative regulation of mitochondrial DNA replication	1	2	0.00701	0.199691	MGP_C57BL6NJ_G0016617(Pid1)
BP	GO:0097324	melanocyte migration	1	2	0.00701	0.199691	MGP_C57BL6NJ_G0026135(Zeb2)
BP	GO:1900041	negative regulation of interleukin-2 secretion	1	2	0.00701	0.199691	MGP_C57BL6NJ_G0017366(Cd34)
BP	GO:1900166	regulation of glial cell-derived neurotrophic factor secretion	1	2	0.00701	0.199691	MGP_C57BL6NJ_G0017366(Cd34)
BP	GO:1900168	positive regulation of glial cell-derived neurotrophic factor secretion	1	2	0.00701	0.199691	MGP_C57BL6NJ_G0017366(Cd34)
BP	GO:1902336	positive regulation of retinal ganglion cell axon guidance	1	2	0.00701	0.199691	MGP_C57BL6NJ_G0034792(Nrp1)
BP	GO:1903056	regulation of melanosome organization	1	2	0.00701	0.199691	MGP_C57BL6NJ_G0026135(Zeb2)
BP	GO:1903995	regulation of non-membrane spanning protein tyrosine kinase activity	1	2	0.00701	0.199691	MGP_C57BL6NJ_G0021900(Adra1a)
BP	GO:1903997	positive regulation of non-membrane spanning protein tyrosine kinase activity	1	2	0.00701	0.199691	MGP_C57BL6NJ_G0021900(Adra1a)
BP	GO:1904344	regulation of gastric mucosal blood circulation	1	2	0.00701	0.199691	MGP_C57BL6NJ_G0021587(Ptger2)
BP	GO:1904346	positive regulation of gastric mucosal blood circulation	1	2	0.00701	0.199691	MGP_C57BL6NJ_G0021587(Ptger2)
BP	GO:1904835	dorsal root ganglion morphogenesis	1	2	0.00701	0.199691	MGP_C57BL6NJ_G0034792(Nrp1)
BP	GO:1990768	gastric mucosal blood circulation	1	2	0.00701	0.199691	MGP_C57BL6NJ_G0021587(Ptger2)
BP	GO:2001170	negative regulation of ATP biosynthetic process	1	2	0.00701	0.199691	MGP_C57BL6NJ_G0016617(Pid1)
MF	GO:0043565	sequence-specific DNA binding	9	968	0.0071	0.199691	MGP_C57BL6NJ_G0016210(St18),MGP_C57BL6NJ_G0016429(Satb2),MGP_C57BL6NJ_G0020351(Batf),MGP_C57BL6NJ_G0020849(Rreb1),MGP_C57BL6NJ_G0021878(Hmbox1),MGP_C57BL6NJ_G0022517(Mkl1),MGP_C57BL6NJ_G0026135(Zeb2),MGP_C57BL6NJ_G0035015(Fli1),MGP_C57BL6NJ_G0035508(Rfx7)
MF	GO:0000010	trans-hexaprenyltranstransferase activity	1	2	0.00713	0.199691	MGP_C57BL6NJ_G0025810(Pdss1)
MF	GO:0004915	interleukin-6 receptor activity	1	2	0.00713	0.199691	MGP_C57BL6NJ_G0021322(Il6st)
MF	GO:0004921	interleukin-11 receptor activity	1	2	0.00713	0.199691	MGP_C57BL6NJ_G0021322(Il6st)
MF	GO:0004923	leukemia inhibitory factor receptor activity	1	2	0.00713	0.199691	MGP_C57BL6NJ_G0021322(Il6st)
MF	GO:0004924	oncostatin-M receptor activity	1	2	0.00713	0.199691	MGP_C57BL6NJ_G0021322(Il6st)
MF	GO:0019970	interleukin-11 binding	1	2	0.00713	0.199691	MGP_C57BL6NJ_G0021322(Il6st)
MF	GO:0019981	interleukin-6 binding	1	2	0.00713	0.199691	MGP_C57BL6NJ_G0021322(Il6st)
MF	GO:0050347	trans-octaprenyltranstransferase activity	1	2	0.00713	0.199691	MGP_C57BL6NJ_G0025810(Pdss1)
BP	GO:0006754	ATP biosynthetic process	2	37	0.00746	0.199691	MGP_C57BL6NJ_G0016617(Pid1),MGP_C57BL6NJ_G0026261(Atp5g3)
BP	GO:0006996	organelle organization	19	3078	0.0075	0.199691	MGP_C57BL6NJ_G0016429(Satb2),MGP_C57BL6NJ_G0016617(Pid1),MGP_C57BL6NJ_G0016967(Trove2),MGP_C57BL6NJ_G0017366(Cd34),MGP_C57BL6NJ_G0020259(Gphn),MGP_C57BL6NJ_G0020402(Efcab11),MGP_C57BL6NJ_G0021878(Hmbox1),MGP_C57BL6NJ_G0022290(Nsmce2),MGP_C57BL6NJ_G0022301(Asap1),MGP_C57BL6NJ_G0022517(Mkl1),MGP_C57BL6NJ_G0024409(Myom1),MGP_C57BL6NJ_G0024426(Ehd3),MGP_C57BL6NJ_G0024539(Rab18),MGP_C57BL6NJ_G0026135(…
BP	GO:0032456	endocytic recycling	2	38	0.00786	0.199691	MGP_C57BL6NJ_G0024426(Ehd3),MGP_C57BL6NJ_G0026118(Dennd1a)
CC	GO:0005737	cytoplasm	41	9070	0.0079	0.199691	MGP_C57BL6NJ_G0016617(Pid1),MGP_C57BL6NJ_G0016967(Trove2),MGP_C57BL6NJ_G0016986(Fam129a),MGP_C57BL6NJ_G0017366(Cd34),MGP_C57BL6NJ_G0018428(Tns3),MGP_C57BL6NJ_G0019711(Pitpnc1),MGP_C57BL6NJ_G0019782(Armc7),MGP_C57BL6NJ_G0020259(Gphn),MGP_C57BL6NJ_G0020351(Batf),MGP_C57BL6NJ_G0020402(Efcab11),MGP_C57BL6NJ_G0021878(Hmbox1),MGP_C57BL6NJ_G0021900(Adra1a),MGP_C57BL6NJ_G0021906(Ppp2r2a),MGP_C57BL6NJ_G00…
MF	GO:0043168	anion binding	16	2377	0.00793	0.199691	MGP_C57BL6NJ_G0017366(Cd34),MGP_C57BL6NJ_G0019711(Pitpnc1),MGP_C57BL6NJ_G0020259(Gphn),MGP_C57BL6NJ_G0021963(Itm2b),MGP_C57BL6NJ_G0022301(Asap1),MGP_C57BL6NJ_G0022940(Snx29),MGP_C57BL6NJ_G0024287(Plcl2),MGP_C57BL6NJ_G0024426(Ehd3),MGP_C57BL6NJ_G0024539(Rab18),MGP_C57BL6NJ_G0024850(Csnk1g3),MGP_C57BL6NJ_G0026118(Dennd1a),MGP_C57BL6NJ_G0029285(Epb41),MGP_C57BL6NJ_G0030171(Cdkl2),MGP_C57BL6NJ_G00334…
BP	GO:0050853	B cell receptor signaling pathway	2	39	0.00827	0.199691	MGP_C57BL6NJ_G0024287(Plcl2),MGP_C57BL6NJ_G0033450(Prkcb)
CC	GO:0009925	basal plasma membrane	2	40	0.0084	0.199691	MGP_C57BL6NJ_G0017366(Cd34),MGP_C57BL6NJ_G0024539(Rab18)
BP	GO:0048286	lung alveolus development	2	40	0.00868	0.199691	MGP_C57BL6NJ_G0018428(Tns3),MGP_C57BL6NJ_G0028083(Man1a2)
BP	GO:0044093	positive regulation of molecular function	11	1399	0.00879	0.199691	MGP_C57BL6NJ_G0016210(St18),MGP_C57BL6NJ_G0021878(Hmbox1),MGP_C57BL6NJ_G0021900(Adra1a),MGP_C57BL6NJ_G0022301(Asap1),MGP_C57BL6NJ_G0024287(Plcl2),MGP_C57BL6NJ_G0024426(Ehd3),MGP_C57BL6NJ_G0026118(Dennd1a),MGP_C57BL6NJ_G0026135(Zeb2),MGP_C57BL6NJ_G0029285(Epb41),MGP_C57BL6NJ_G0033450(Prkcb),MGP_C57BL6NJ_G0034792(Nrp1)
MF	GO:0005543	phospholipid binding	5	359	0.00909	0.199691	MGP_C57BL6NJ_G0019711(Pitpnc1),MGP_C57BL6NJ_G0022301(Asap1),MGP_C57BL6NJ_G0022940(Snx29),MGP_C57BL6NJ_G0026118(Dennd1a),MGP_C57BL6NJ_G0029285(Epb41)
BP	GO:0048010	vascular endothelial growth factor receptor signaling pathway	2	43	0.00999	0.199691	MGP_C57BL6NJ_G0033450(Prkcb),MGP_C57BL6NJ_G0034792(Nrp1)
BP	GO:0050854	regulation of antigen receptor-mediated signaling pathway	2	43	0.00999	0.199691	MGP_C57BL6NJ_G0024287(Plcl2),MGP_C57BL6NJ_G0033450(Prkcb)
BP	GO:0070542	response to fatty acid	2	43	0.00999	0.199691	MGP_C57BL6NJ_G0016617(Pid1),MGP_C57BL6NJ_G0021587(Ptger2)
CC	GO:0005896	interleukin-6 receptor complex	1	3	0.0103	0.199691	MGP_C57BL6NJ_G0021322(Il6st)
CC	GO:0020016	ciliary pocket	1	3	0.0103	0.199691	MGP_C57BL6NJ_G0024426(Ehd3)
CC	GO:0020018	ciliary pocket membrane	1	3	0.0103	0.199691	MGP_C57BL6NJ_G0024426(Ehd3)
CC	GO:0097452	GAIT complex	1	3	0.0103	0.199691	MGP_C57BL6NJ_G0035602(Syncrip)
BP	GO:0001923	B-1 B cell differentiation	1	3	0.0105	0.199691	MGP_C57BL6NJ_G0024287(Plcl2)
BP	GO:0001978	regulation of systemic arterial blood pressure by carotid sinus baroreceptor feedback	1	3	0.0105	0.199691	MGP_C57BL6NJ_G0021900(Adra1a)
BP	GO:0001996	positive regulation of heart rate by epinephrine-norepinephrine	1	3	0.0105	0.199691	MGP_C57BL6NJ_G0021900(Adra1a)
BP	GO:0001997	positive regulation of the force of heart contraction by epinephrine-norepinephrine	1	3	0.0105	0.199691	MGP_C57BL6NJ_G0021900(Adra1a)
BP	GO:0003099	positive regulation of the force of heart contraction by chemical signal	1	3	0.0105	0.199691	MGP_C57BL6NJ_G0021900(Adra1a)
BP	GO:0021824	cerebral cortex tangential migration using cell-axon interactions	1	3	0.0105	0.199691	MGP_C57BL6NJ_G0034792(Nrp1)
BP	GO:0021828	gonadotrophin-releasing hormone neuronal migration to the hypothalamus	1	3	0.0105	0.199691	MGP_C57BL6NJ_G0034792(Nrp1)
BP	GO:0021856	hypothalamic tangential migration using cell-axon interactions	1	3	0.0105	0.199691	MGP_C57BL6NJ_G0034792(Nrp1)
BP	GO:0021886	hypothalamus gonadotrophin-releasing hormone neuron differentiation	1	3	0.0105	0.199691	MGP_C57BL6NJ_G0034792(Nrp1)
BP	GO:0021888	hypothalamus gonadotrophin-releasing hormone neuron development	1	3	0.0105	0.199691	MGP_C57BL6NJ_G0034792(Nrp1)
BP	GO:0030474	spindle pole body duplication	1	3	0.0105	0.199691	MGP_C57BL6NJ_G0020402(Efcab11)
BP	GO:0032324	molybdopterin cofactor biosynthetic process	1	3	0.0105	0.199691	MGP_C57BL6NJ_G0020259(Gphn)
BP	GO:0070103	regulation of interleukin-6-mediated signaling pathway	1	3	0.0105	0.199691	MGP_C57BL6NJ_G0021322(Il6st)
BP	GO:0071657	positive regulation of granulocyte colony-stimulating factor production	1	3	0.0105	0.199691	MGP_C57BL6NJ_G0017366(Cd34)
BP	GO:0090296	regulation of mitochondrial DNA replication	1	3	0.0105	0.199691	MGP_C57BL6NJ_G0016617(Pid1)
BP	GO:0097112	gamma-aminobutyric acid receptor clustering	1	3	0.0105	0.199691	MGP_C57BL6NJ_G0020259(Gphn)
BP	GO:0097195	pilomotor reflex	1	3	0.0105	0.199691	MGP_C57BL6NJ_G0021900(Adra1a)
BP	GO:0097374	sensory neuron axon guidance	1	3	0.0105	0.199691	MGP_C57BL6NJ_G0034792(Nrp1)
BP	GO:1901258	positive regulation of macrophage colony-stimulating factor production	1	3	0.0105	0.199691	MGP_C57BL6NJ_G0017366(Cd34)
BP	GO:1901859	negative regulation of mitochondrial DNA metabolic process	1	3	0.0105	0.199691	MGP_C57BL6NJ_G0016617(Pid1)
BP	GO:1903087	mitotic spindle pole body duplication	1	3	0.0105	0.199691	MGP_C57BL6NJ_G0020402(Efcab11)
BP	GO:1903375	facioacoustic ganglion development	1	3	0.0105	0.199691	MGP_C57BL6NJ_G0034792(Nrp1)
BP	GO:1903527	positive regulation of membrane tubulation	1	3	0.0105	0.199691	MGP_C57BL6NJ_G0022301(Asap1)
MF	GO:0004937	alpha1-adrenergic receptor activity	1	3	0.01068	0.199691	MGP_C57BL6NJ_G0021900(Adra1a)
MF	GO:0008940	nitrate reductase activity	1	3	0.01068	0.199691	MGP_C57BL6NJ_G0020259(Gphn)
MF	GO:0038085	vascular endothelial growth factor binding	1	3	0.01068	0.199691	MGP_C57BL6NJ_G0034792(Nrp1)
MF	GO:0045134	uridine-diphosphatase activity	1	3	0.01068	0.199691	MGP_C57BL6NJ_G0021924(Gm21685)
MF	GO:0000976	transcription regulatory region sequence-specific DNA binding	7	685	0.01082	0.199691	MGP_C57BL6NJ_G0016210(St18),MGP_C57BL6NJ_G0016429(Satb2),MGP_C57BL6NJ_G0020351(Batf),MGP_C57BL6NJ_G0020849(Rreb1),MGP_C57BL6NJ_G0022517(Mkl1),MGP_C57BL6NJ_G0035015(Fli1),MGP_C57BL6NJ_G0035508(Rfx7)
BP	GO:0010628	positive regulation of gene expression	12	1643	0.01084	0.199691	MGP_C57BL6NJ_G0016210(St18),MGP_C57BL6NJ_G0016429(Satb2),MGP_C57BL6NJ_G0016617(Pid1),MGP_C57BL6NJ_G0016986(Fam129a),MGP_C57BL6NJ_G0020351(Batf),MGP_C57BL6NJ_G0020849(Rreb1),MGP_C57BL6NJ_G0021878(Hmbox1),MGP_C57BL6NJ_G0022517(Mkl1),MGP_C57BL6NJ_G0024409(Myom1),MGP_C57BL6NJ_G0026135(Zeb2),MGP_C57BL6NJ_G0035015(Fli1),MGP_C57BL6NJ_G0035602(Syncrip)
BP	GO:0009206	purine ribonucleoside triphosphate biosynthetic process	2	46	0.01137	0.199691	MGP_C57BL6NJ_G0016617(Pid1),MGP_C57BL6NJ_G0026261(Atp5g3)
BP	GO:0006941	striated muscle contraction	3	133	0.01143	0.199691	MGP_C57BL6NJ_G0021900(Adra1a),MGP_C57BL6NJ_G0024409(Myom1),MGP_C57BL6NJ_G0024426(Ehd3)
BP	GO:1990778	protein localization to cell periphery	4	250	0.01151	0.199691	MGP_C57BL6NJ_G0016617(Pid1),MGP_C57BL6NJ_G0020259(Gphn),MGP_C57BL6NJ_G0024426(Ehd3),MGP_C57BL6NJ_G0029285(Epb41)
BP	GO:0022603	regulation of anatomical structure morphogenesis	8	883	0.01168	0.199691	MGP_C57BL6NJ_G0017366(Cd34),MGP_C57BL6NJ_G0020849(Rreb1),MGP_C57BL6NJ_G0024850(Csnk1g3),MGP_C57BL6NJ_G0026135(Zeb2),MGP_C57BL6NJ_G0028281(Ap1ar),MGP_C57BL6NJ_G0029285(Epb41),MGP_C57BL6NJ_G0033450(Prkcb),MGP_C57BL6NJ_G0034792(Nrp1)
BP	GO:0009145	purine nucleoside triphosphate biosynthetic process	2	47	0.01185	0.199691	MGP_C57BL6NJ_G0016617(Pid1),MGP_C57BL6NJ_G0026261(Atp5g3)
BP	GO:0045766	positive regulation of angiogenesis	3	136	0.01214	0.199691	MGP_C57BL6NJ_G0017366(Cd34),MGP_C57BL6NJ_G0033450(Prkcb),MGP_C57BL6NJ_G0034792(Nrp1)
BP	GO:0010638	positive regulation of organelle organization	6	548	0.01228	0.199691	MGP_C57BL6NJ_G0021878(Hmbox1),MGP_C57BL6NJ_G0022290(Nsmce2),MGP_C57BL6NJ_G0022301(Asap1),MGP_C57BL6NJ_G0028281(Ap1ar),MGP_C57BL6NJ_G0030171(Cdkl2),MGP_C57BL6NJ_G0034792(Nrp1)
BP	GO:0051932	synaptic transmission, GABAergic	2	49	0.01283	0.199691	MGP_C57BL6NJ_G0021900(Adra1a),MGP_C57BL6NJ_G0024287(Plcl2)
BP	GO:0033043	regulation of organelle organization	9	1087	0.01308	0.199691	MGP_C57BL6NJ_G0016617(Pid1),MGP_C57BL6NJ_G0021878(Hmbox1),MGP_C57BL6NJ_G0022290(Nsmce2),MGP_C57BL6NJ_G0022301(Asap1),MGP_C57BL6NJ_G0024426(Ehd3),MGP_C57BL6NJ_G0026135(Zeb2),MGP_C57BL6NJ_G0028281(Ap1ar),MGP_C57BL6NJ_G0030171(Cdkl2),MGP_C57BL6NJ_G0034792(Nrp1)
BP	GO:0046626	regulation of insulin receptor signaling pathway	2	50	0.01334	0.199691	MGP_C57BL6NJ_G0016617(Pid1),MGP_C57BL6NJ_G0033450(Prkcb)
MF	GO:1990837	sequence-specific double-stranded DNA binding	7	717	0.01365	0.199691	MGP_C57BL6NJ_G0016210(St18),MGP_C57BL6NJ_G0016429(Satb2),MGP_C57BL6NJ_G0020351(Batf),MGP_C57BL6NJ_G0020849(Rreb1),MGP_C57BL6NJ_G0022517(Mkl1),MGP_C57BL6NJ_G0035015(Fli1),MGP_C57BL6NJ_G0035508(Rfx7)
CC	GO:0031166	integral component of vacuolar membrane	1	4	0.0137	0.199691	MGP_C57BL6NJ_G0021924(Gm21685)
CC	GO:0031310	intrinsic component of vacuolar membrane	1	4	0.0137	0.199691	MGP_C57BL6NJ_G0021924(Gm21685)
CC	GO:0070110	ciliary neurotrophic factor receptor complex	1	4	0.0137	0.199691	MGP_C57BL6NJ_G0021322(Il6st)
CC	GO:0070390	transcription export complex 2	1	4	0.0137	0.199691	MGP_C57BL6NJ_G0020402(Efcab11)
CC	GO:0097443	sorting endosome	1	4	0.0137	0.199691	MGP_C57BL6NJ_G0034792(Nrp1)
BP	GO:0006642	triglyceride mobilization	1	4	0.01397	0.199691	MGP_C57BL6NJ_G0021322(Il6st)
BP	GO:0010735	positive regulation of transcription via serum response element binding	1	4	0.01397	0.199691	MGP_C57BL6NJ_G0022517(Mkl1)
BP	GO:0021540	corpus callosum morphogenesis	1	4	0.01397	0.199691	MGP_C57BL6NJ_G0026135(Zeb2)
BP	GO:0032483	regulation of Rab protein signal transduction	1	4	0.01397	0.199691	MGP_C57BL6NJ_G0026118(Dennd1a)
BP	GO:0034184	positive regulation of maintenance of mitotic sister chromatid cohesion	1	4	0.01397	0.199691	MGP_C57BL6NJ_G0022290(Nsmce2)
BP	GO:0035290	trunk segmentation	1	4	0.01397	0.199691	MGP_C57BL6NJ_G0034792(Nrp1)
BP	GO:0036484	trunk neural crest cell migration	1	4	0.01397	0.199691	MGP_C57BL6NJ_G0034792(Nrp1)
BP	GO:0036486	ventral trunk neural crest cell migration	1	4	0.01397	0.199691	MGP_C57BL6NJ_G0034792(Nrp1)
BP	GO:0038001	paracrine signaling	1	4	0.01397	0.199691	MGP_C57BL6NJ_G0017366(Cd34)
BP	GO:0048023	positive regulation of melanin biosynthetic process	1	4	0.01397	0.199691	MGP_C57BL6NJ_G0026135(Zeb2)
BP	GO:0048861	leukemia inhibitory factor signaling pathway	1	4	0.01397	0.199691	MGP_C57BL6NJ_G0021322(Il6st)
BP	GO:0070346	positive regulation of fat cell proliferation	1	4	0.01397	0.199691	MGP_C57BL6NJ_G0016617(Pid1)
BP	GO:0070934	CRD-mediated mRNA stabilization	1	4	0.01397	0.199691	MGP_C57BL6NJ_G0035602(Syncrip)
BP	GO:0071611	granulocyte colony-stimulating factor production	1	4	0.01397	0.199691	MGP_C57BL6NJ_G0017366(Cd34)
BP	GO:0071655	regulation of granulocyte colony-stimulating factor production	1	4	0.01397	0.199691	MGP_C57BL6NJ_G0017366(Cd34)
BP	GO:0090259	regulation of retinal ganglion cell axon guidance	1	4	0.01397	0.199691	MGP_C57BL6NJ_G0034792(Nrp1)
BP	GO:0097490	sympathetic neuron projection extension	1	4	0.01397	0.199691	MGP_C57BL6NJ_G0034792(Nrp1)
BP	GO:0097491	sympathetic neuron projection guidance	1	4	0.01397	0.199691	MGP_C57BL6NJ_G0034792(Nrp1)
BP	GO:1900034	regulation of cellular response to heat	1	4	0.01397	0.199691	MGP_C57BL6NJ_G0017366(Cd34)
BP	GO:1900378	positive regulation of secondary metabolite biosynthetic process	1	4	0.01397	0.199691	MGP_C57BL6NJ_G0026135(Zeb2)
BP	GO:1902746	regulation of lens fiber cell differentiation	1	4	0.01397	0.199691	MGP_C57BL6NJ_G0026135(Zeb2)
BP	GO:1903525	regulation of membrane tubulation	1	4	0.01397	0.199691	MGP_C57BL6NJ_G0022301(Asap1)
BP	GO:1903689	regulation of wound healing, spreading of epidermal cells	1	4	0.01397	0.199691	MGP_C57BL6NJ_G0020849(Rreb1)
BP	GO:1990791	dorsal root ganglion development	1	4	0.01397	0.199691	MGP_C57BL6NJ_G0034792(Nrp1)
BP	GO:2001274	negative regulation of glucose import in response to insulin stimulus	1	4	0.01397	0.199691	MGP_C57BL6NJ_G0016617(Pid1)
MF	GO:0004897	ciliary neurotrophic factor receptor activity	1	4	0.01422	0.199691	MGP_C57BL6NJ_G0021322(Il6st)
MF	GO:0004957	prostaglandin E receptor activity	1	4	0.01422	0.199691	MGP_C57BL6NJ_G0021587(Ptger2)
BP	GO:0001755	neural crest cell migration	2	52	0.01437	0.199691	MGP_C57BL6NJ_G0026135(Zeb2),MGP_C57BL6NJ_G0034792(Nrp1)
BP	GO:0009201	ribonucleoside triphosphate biosynthetic process	2	52	0.01437	0.199691	MGP_C57BL6NJ_G0016617(Pid1),MGP_C57BL6NJ_G0026261(Atp5g3)
BP	GO:0008015	blood circulation	5	411	0.01456	0.199691	MGP_C57BL6NJ_G0017366(Cd34),MGP_C57BL6NJ_G0021587(Ptger2),MGP_C57BL6NJ_G0021900(Adra1a),MGP_C57BL6NJ_G0024426(Ehd3),MGP_C57BL6NJ_G0035015(Fli1)
BP	GO:0010770	positive regulation of cell morphogenesis involved in differentiation	3	146	0.01467	0.199691	MGP_C57BL6NJ_G0020849(Rreb1),MGP_C57BL6NJ_G0026135(Zeb2),MGP_C57BL6NJ_G0034792(Nrp1)
BP	GO:0031589	cell-substrate adhesion	4	269	0.01472	0.199691	MGP_C57BL6NJ_G0017366(Cd34),MGP_C57BL6NJ_G0020849(Rreb1),MGP_C57BL6NJ_G0028281(Ap1ar),MGP_C57BL6NJ_G0034792(Nrp1)
BP	GO:0003013	circulatory system process	5	419	0.01571	0.199691	MGP_C57BL6NJ_G0017366(Cd34),MGP_C57BL6NJ_G0021587(Ptger2),MGP_C57BL6NJ_G0021900(Adra1a),MGP_C57BL6NJ_G0024426(Ehd3),MGP_C57BL6NJ_G0035015(Fli1)
BP	GO:1904018	positive regulation of vasculature development	3	150	0.01577	0.199691	MGP_C57BL6NJ_G0017366(Cd34),MGP_C57BL6NJ_G0033450(Prkcb),MGP_C57BL6NJ_G0034792(Nrp1)
BP	GO:0048856	anatomical structure development	25	4783	0.01587	0.199691	MGP_C57BL6NJ_G0016429(Satb2),MGP_C57BL6NJ_G0016617(Pid1),MGP_C57BL6NJ_G0016967(Trove2),MGP_C57BL6NJ_G0017366(Cd34),MGP_C57BL6NJ_G0018428(Tns3),MGP_C57BL6NJ_G0020351(Batf),MGP_C57BL6NJ_G0020849(Rreb1),MGP_C57BL6NJ_G0021322(Il6st),MGP_C57BL6NJ_G0021900(Adra1a),MGP_C57BL6NJ_G0021963(Itm2b),MGP_C57BL6NJ_G0022301(Asap1),MGP_C57BL6NJ_G0022517(Mkl1),MGP_C57BL6NJ_G0024287(Plcl2),MGP_C57BL6NJ_G0024409(Myo…
BP	GO:0001764	neuron migration	3	152	0.01633	0.199691	MGP_C57BL6NJ_G0016429(Satb2),MGP_C57BL6NJ_G0022517(Mkl1),MGP_C57BL6NJ_G0034792(Nrp1)
BP	GO:0009880	embryonic pattern specification	2	56	0.01654	0.199691	MGP_C57BL6NJ_G0016429(Satb2),MGP_C57BL6NJ_G0034792(Nrp1)
BP	GO:0021879	forebrain neuron differentiation	2	56	0.01654	0.199691	MGP_C57BL6NJ_G0016429(Satb2),MGP_C57BL6NJ_G0034792(Nrp1)
BP	GO:0032482	Rab protein signal transduction	2	56	0.01654	0.199691	MGP_C57BL6NJ_G0024539(Rab18),MGP_C57BL6NJ_G0026118(Dennd1a)
BP	GO:0055117	regulation of cardiac muscle contraction	2	56	0.01654	0.199691	MGP_C57BL6NJ_G0021900(Adra1a),MGP_C57BL6NJ_G0024426(Ehd3)
BP	GO:0010769	regulation of cell morphogenesis involved in differentiation	4	279	0.01661	0.199691	MGP_C57BL6NJ_G0020849(Rreb1),MGP_C57BL6NJ_G0026135(Zeb2),MGP_C57BL6NJ_G0028281(Ap1ar),MGP_C57BL6NJ_G0034792(Nrp1)
BP	GO:0009127	purine nucleoside monophosphate biosynthetic process	2	57	0.0171	0.199691	MGP_C57BL6NJ_G0016617(Pid1),MGP_C57BL6NJ_G0026261(Atp5g3)
BP	GO:0009168	purine ribonucleoside monophosphate biosynthetic process	2	57	0.0171	0.199691	MGP_C57BL6NJ_G0016617(Pid1),MGP_C57BL6NJ_G0026261(Atp5g3)
CC	GO:0045178	basal part of cell	2	58	0.0171	0.199691	MGP_C57BL6NJ_G0017366(Cd34),MGP_C57BL6NJ_G0024539(Rab18)
CC	GO:0070937	CRD-mediated mRNA stability complex	1	5	0.0171	0.199691	MGP_C57BL6NJ_G0035602(Syncrip)
CC	GO:0071204	histone pre-mRNA 3'end processing complex	1	5	0.0171	0.199691	MGP_C57BL6NJ_G0035602(Syncrip)
CC	GO:0098691	dopaminergic synapse	1	5	0.0171	0.199691	MGP_C57BL6NJ_G0021900(Adra1a)
BP	GO:0002322	B cell proliferation involved in immune response	1	5	0.01744	0.199691	MGP_C57BL6NJ_G0024287(Plcl2)
BP	GO:0003025	regulation of systemic arterial blood pressure by baroreceptor feedback	1	5	0.01744	0.199691	MGP_C57BL6NJ_G0021900(Adra1a)
BP	GO:0003321	positive regulation of blood pressure by epinephrine-norepinephrine	1	5	0.01744	0.199691	MGP_C57BL6NJ_G0021900(Adra1a)
BP	GO:0006777	Mo-molybdopterin cofactor biosynthetic process	1	5	0.01744	0.199691	MGP_C57BL6NJ_G0020259(Gphn)
BP	GO:0019720	Mo-molybdopterin cofactor metabolic process	1	5	0.01744	0.199691	MGP_C57BL6NJ_G0020259(Gphn)
BP	GO:0021636	trigeminal nerve morphogenesis	1	5	0.01744	0.199691	MGP_C57BL6NJ_G0034792(Nrp1)
BP	GO:0021637	trigeminal nerve structural organization	1	5	0.01744	0.199691	MGP_C57BL6NJ_G0034792(Nrp1)
BP	GO:0021648	vestibulocochlear nerve morphogenesis	1	5	0.01744	0.199691	MGP_C57BL6NJ_G0034792(Nrp1)
BP	GO:0021825	substrate-dependent cerebral cortex tangential migration	1	5	0.01744	0.199691	MGP_C57BL6NJ_G0034792(Nrp1)
BP	GO:0021855	hypothalamus cell migration	1	5	0.01744	0.199691	MGP_C57BL6NJ_G0034792(Nrp1)
BP	GO:0032489	regulation of Cdc42 protein signal transduction	1	5	0.01744	0.199691	MGP_C57BL6NJ_G0034792(Nrp1)
BP	GO:0034093	positive regulation of maintenance of sister chromatid cohesion	1	5	0.01744	0.199691	MGP_C57BL6NJ_G0022290(Nsmce2)
BP	GO:0034498	early endosome to Golgi transport	1	5	0.01744	0.199691	MGP_C57BL6NJ_G0024426(Ehd3)
BP	GO:0035405	histone-threonine phosphorylation	1	5	0.01744	0.199691	MGP_C57BL6NJ_G0033450(Prkcb)
BP	GO:0036301	macrophage colony-stimulating factor production	1	5	0.01744	0.199691	MGP_C57BL6NJ_G0017366(Cd34)
BP	GO:0042985	negative regulation of amyloid precursor protein biosynthetic process	1	5	0.01744	0.199691	MGP_C57BL6NJ_G0021963(Itm2b)
BP	GO:0045636	positive regulation of melanocyte differentiation	1	5	0.01744	0.199691	MGP_C57BL6NJ_G0026135(Zeb2)
BP	GO:0048842	positive regulation of axon extension involved in axon guidance	1	5	0.01744	0.199691	MGP_C57BL6NJ_G0034792(Nrp1)
BP	GO:0060385	axonogenesis involved in innervation	1	5	0.01744	0.199691	MGP_C57BL6NJ_G0034792(Nrp1)
BP	GO:0060666	dichotomous subdivision of terminal units involved in salivary gland branching	1	5	0.01744	0.199691	MGP_C57BL6NJ_G0034792(Nrp1)
BP	GO:0060978	angiogenesis involved in coronary vascular morphogenesis	1	5	0.01744	0.199691	MGP_C57BL6NJ_G0034792(Nrp1)
BP	GO:0061438	renal system vasculature morphogenesis	1	5	0.01744	0.199691	MGP_C57BL6NJ_G0034792(Nrp1)
BP	GO:0061439	kidney vasculature morphogenesis	1	5	0.01744	0.199691	MGP_C57BL6NJ_G0034792(Nrp1)
BP	GO:0061551	trigeminal ganglion development	1	5	0.01744	0.199691	MGP_C57BL6NJ_G0034792(Nrp1)
BP	GO:0070120	ciliary neurotrophic factor-mediated signaling pathway	1	5	0.01744	0.199691	MGP_C57BL6NJ_G0021322(Il6st)
BP	GO:0090160	Golgi to lysosome transport	1	5	0.01744	0.199691	MGP_C57BL6NJ_G0024426(Ehd3)
BP	GO:1901256	regulation of macrophage colony-stimulating factor production	1	5	0.01744	0.199691	MGP_C57BL6NJ_G0017366(Cd34)
MF	GO:0005021	vascular endothelial growth factor-activated receptor activity	1	5	0.01774	0.199691	MGP_C57BL6NJ_G0034792(Nrp1)
MF	GO:0030620	U2 snRNA binding	1	5	0.01774	0.199691	MGP_C57BL6NJ_G0016967(Trove2)
MF	GO:0035184	histone threonine kinase activity	1	5	0.01774	0.199691	MGP_C57BL6NJ_G0033450(Prkcb)
MF	GO:0035650	AP-1 adaptor complex binding	1	5	0.01774	0.199691	MGP_C57BL6NJ_G0028281(Ap1ar)
MF	GO:0043199	sulfate binding	1	5	0.01774	0.199691	MGP_C57BL6NJ_G0017366(Cd34)
BP	GO:0031032	actomyosin structure organization	3	159	0.01839	0.205285	MGP_C57BL6NJ_G0024409(Myom1),MGP_C57BL6NJ_G0029285(Epb41),MGP_C57BL6NJ_G0034792(Nrp1)
BP	GO:0050731	positive regulation of peptidyl-tyrosine phosphorylation	3	162	0.01931	0.205285	MGP_C57BL6NJ_G0021322(Il6st),MGP_C57BL6NJ_G0021900(Adra1a),MGP_C57BL6NJ_G0034792(Nrp1)
BP	GO:0009142	nucleoside triphosphate biosynthetic process	2	61	0.01944	0.205285	MGP_C57BL6NJ_G0016617(Pid1),MGP_C57BL6NJ_G0026261(Atp5g3)
BP	GO:1902680	positive regulation of RNA biosynthetic process	10	1362	0.01946	0.205285	MGP_C57BL6NJ_G0016210(St18),MGP_C57BL6NJ_G0016429(Satb2),MGP_C57BL6NJ_G0016617(Pid1),MGP_C57BL6NJ_G0020351(Batf),MGP_C57BL6NJ_G0020849(Rreb1),MGP_C57BL6NJ_G0021878(Hmbox1),MGP_C57BL6NJ_G0022517(Mkl1),MGP_C57BL6NJ_G0026135(Zeb2),MGP_C57BL6NJ_G0033450(Prkcb),MGP_C57BL6NJ_G0035015(Fli1)
BP	GO:1903508	positive regulation of nucleic acid-templated transcription	10	1362	0.01946	0.205285	MGP_C57BL6NJ_G0016210(St18),MGP_C57BL6NJ_G0016429(Satb2),MGP_C57BL6NJ_G0016617(Pid1),MGP_C57BL6NJ_G0020351(Batf),MGP_C57BL6NJ_G0020849(Rreb1),MGP_C57BL6NJ_G0021878(Hmbox1),MGP_C57BL6NJ_G0022517(Mkl1),MGP_C57BL6NJ_G0026135(Zeb2),MGP_C57BL6NJ_G0033450(Prkcb),MGP_C57BL6NJ_G0035015(Fli1)
BP	GO:0051179	localization	26	5123	0.01965	0.205285	MGP_C57BL6NJ_G0016429(Satb2),MGP_C57BL6NJ_G0016617(Pid1),MGP_C57BL6NJ_G0017366(Cd34),MGP_C57BL6NJ_G0018428(Tns3),MGP_C57BL6NJ_G0019711(Pitpnc1),MGP_C57BL6NJ_G0020259(Gphn),MGP_C57BL6NJ_G0020849(Rreb1),MGP_C57BL6NJ_G0021322(Il6st),MGP_C57BL6NJ_G0021900(Adra1a),MGP_C57BL6NJ_G0022517(Mkl1),MGP_C57BL6NJ_G0024409(Myom1),MGP_C57BL6NJ_G0024426(Ehd3),MGP_C57BL6NJ_G0024539(Rab18),MGP_C57BL6NJ_G0024850(Csn…
BP	GO:0051099	positive regulation of binding	3	164	0.01994	0.205285	MGP_C57BL6NJ_G0021878(Hmbox1),MGP_C57BL6NJ_G0024287(Plcl2),MGP_C57BL6NJ_G0029285(Epb41)
CC	GO:0098590	plasma membrane region	8	993	0.0201	0.205285	MGP_C57BL6NJ_G0017366(Cd34),MGP_C57BL6NJ_G0020259(Gphn),MGP_C57BL6NJ_G0021900(Adra1a),MGP_C57BL6NJ_G0022301(Asap1),MGP_C57BL6NJ_G0024426(Ehd3),MGP_C57BL6NJ_G0024539(Rab18),MGP_C57BL6NJ_G0026118(Dennd1a),MGP_C57BL6NJ_G0033450(Prkcb)
BP	GO:0010557	positive regulation of macromolecule biosynthetic process	11	1578	0.02031	0.205285	MGP_C57BL6NJ_G0016210(St18),MGP_C57BL6NJ_G0016429(Satb2),MGP_C57BL6NJ_G0016617(Pid1),MGP_C57BL6NJ_G0016986(Fam129a),MGP_C57BL6NJ_G0020351(Batf),MGP_C57BL6NJ_G0020849(Rreb1),MGP_C57BL6NJ_G0021878(Hmbox1),MGP_C57BL6NJ_G0022517(Mkl1),MGP_C57BL6NJ_G0026135(Zeb2),MGP_C57BL6NJ_G0033450(Prkcb),MGP_C57BL6NJ_G0035015(Fli1)
CC	GO:0030915	Smc5-Smc6 complex	1	6	0.0205	0.205285	MGP_C57BL6NJ_G0022290(Nsmce2)
CC	GO:0098690	glycinergic synapse	1	6	0.0205	0.205285	MGP_C57BL6NJ_G0020259(Gphn)
MF	GO:0043167	ion binding	26	5053	0.02058	0.205285	MGP_C57BL6NJ_G0016210(St18),MGP_C57BL6NJ_G0016967(Trove2),MGP_C57BL6NJ_G0017366(Cd34),MGP_C57BL6NJ_G0017454(Pde7b),MGP_C57BL6NJ_G0019711(Pitpnc1),MGP_C57BL6NJ_G0020259(Gphn),MGP_C57BL6NJ_G0020402(Efcab11),MGP_C57BL6NJ_G0020849(Rreb1),MGP_C57BL6NJ_G0021963(Itm2b),MGP_C57BL6NJ_G0022290(Nsmce2),MGP_C57BL6NJ_G0022301(Asap1),MGP_C57BL6NJ_G0022940(Snx29),MGP_C57BL6NJ_G0024287(Plcl2),MGP_C57BL6NJ_G00244…
BP	GO:0021536	diencephalon development	2	63	0.02065	0.205285	MGP_C57BL6NJ_G0026135(Zeb2),MGP_C57BL6NJ_G0034792(Nrp1)
BP	GO:0001993	regulation of systemic arterial blood pressure by norepinephrine-epinephrine	1	6	0.02089	0.205285	MGP_C57BL6NJ_G0021900(Adra1a)
BP	GO:0003057	regulation of the force of heart contraction by chemical signal	1	6	0.02089	0.205285	MGP_C57BL6NJ_G0021900(Adra1a)
BP	GO:0021785	branchiomotor neuron axon guidance	1	6	0.02089	0.205285	MGP_C57BL6NJ_G0034792(Nrp1)
BP	GO:0034182	regulation of maintenance of mitotic sister chromatid cohesion	1	6	0.02089	0.205285	MGP_C57BL6NJ_G0022290(Nsmce2)
BP	GO:0043545	molybdopterin cofactor metabolic process	1	6	0.02089	0.205285	MGP_C57BL6NJ_G0020259(Gphn)
BP	GO:0045842	positive regulation of mitotic metaphase/anaphase transition	1	6	0.02089	0.205285	MGP_C57BL6NJ_G0022290(Nsmce2)
BP	GO:0050859	negative regulation of B cell receptor signaling pathway	1	6	0.02089	0.205285	MGP_C57BL6NJ_G0024287(Plcl2)
BP	GO:0050861	positive regulation of B cell receptor signaling pathway	1	6	0.02089	0.205285	MGP_C57BL6NJ_G0033450(Prkcb)
BP	GO:0051189	prosthetic group metabolic process	1	6	0.02089	0.205285	MGP_C57BL6NJ_G0020259(Gphn)
BP	GO:0060073	micturition	1	6	0.02089	0.205285	MGP_C57BL6NJ_G0021900(Adra1a)
BP	GO:0061550	cranial ganglion development	1	6	0.02089	0.205285	MGP_C57BL6NJ_G0034792(Nrp1)
BP	GO:0071971	extracellular exosome assembly	1	6	0.02089	0.205285	MGP_C57BL6NJ_G0017366(Cd34)
BP	GO:0086036	regulation of cardiac muscle cell membrane potential	1	6	0.02089	0.205285	MGP_C57BL6NJ_G0024426(Ehd3)
BP	GO:0090037	positive regulation of protein kinase C signaling	1	6	0.02089	0.205285	MGP_C57BL6NJ_G0021900(Adra1a)
BP	GO:0097475	motor neuron migration	1	6	0.02089	0.205285	MGP_C57BL6NJ_G0034792(Nrp1)
BP	GO:1901858	regulation of mitochondrial DNA metabolic process	1	6	0.02089	0.205285	MGP_C57BL6NJ_G0016617(Pid1)
BP	GO:1901970	positive regulation of mitotic sister chromatid separation	1	6	0.02089	0.205285	MGP_C57BL6NJ_G0022290(Nsmce2)
BP	GO:1902669	positive regulation of axon guidance	1	6	0.02089	0.205285	MGP_C57BL6NJ_G0034792(Nrp1)
BP	GO:1904778	positive regulation of protein localization to cell cortex	1	6	0.02089	0.205285	MGP_C57BL6NJ_G0029285(Epb41)
BP	GO:2000394	positive regulation of lamellipodium morphogenesis	1	6	0.02089	0.205285	MGP_C57BL6NJ_G0020849(Rreb1)
MF	GO:0003720	telomerase activity	1	6	0.02125	0.205285	MGP_C57BL6NJ_G0021878(Hmbox1)
MF	GO:0003964	RNA-directed DNA polymerase activity	1	6	0.02125	0.205285	MGP_C57BL6NJ_G0021878(Hmbox1)
MF	GO:0004936	alpha-adrenergic receptor activity	1	6	0.02125	0.205285	MGP_C57BL6NJ_G0021900(Adra1a)
MF	GO:0005127	ciliary neurotrophic factor receptor binding	1	6	0.02125	0.205285	MGP_C57BL6NJ_G0021322(Il6st)
MF	GO:0030023	extracellular matrix constituent conferring elasticity	1	6	0.02125	0.205285	MGP_C57BL6NJ_G0031664(Mfap5)
BP	GO:0021872	forebrain generation of neurons	2	65	0.0219	0.209508	MGP_C57BL6NJ_G0016429(Satb2),MGP_C57BL6NJ_G0034792(Nrp1)
MF	GO:0000975	regulatory region DNA binding	7	789	0.02193	0.209508	MGP_C57BL6NJ_G0016210(St18),MGP_C57BL6NJ_G0016429(Satb2),MGP_C57BL6NJ_G0020351(Batf),MGP_C57BL6NJ_G0020849(Rreb1),MGP_C57BL6NJ_G0022517(Mkl1),MGP_C57BL6NJ_G0035015(Fli1),MGP_C57BL6NJ_G0035508(Rfx7)
MF	GO:0044212	transcription regulatory region DNA binding	7	789	0.02193	0.209508	MGP_C57BL6NJ_G0016210(St18),MGP_C57BL6NJ_G0016429(Satb2),MGP_C57BL6NJ_G0020351(Batf),MGP_C57BL6NJ_G0020849(Rreb1),MGP_C57BL6NJ_G0022517(Mkl1),MGP_C57BL6NJ_G0035015(Fli1),MGP_C57BL6NJ_G0035508(Rfx7)
BP	GO:0010604	positive regulation of macromolecule metabolic process	16	2709	0.0222	0.209863	MGP_C57BL6NJ_G0016210(St18),MGP_C57BL6NJ_G0016429(Satb2),MGP_C57BL6NJ_G0016617(Pid1),MGP_C57BL6NJ_G0016986(Fam129a),MGP_C57BL6NJ_G0020351(Batf),MGP_C57BL6NJ_G0020849(Rreb1),MGP_C57BL6NJ_G0021322(Il6st),MGP_C57BL6NJ_G0021878(Hmbox1),MGP_C57BL6NJ_G0021900(Adra1a),MGP_C57BL6NJ_G0022517(Mkl1),MGP_C57BL6NJ_G0024409(Myom1),MGP_C57BL6NJ_G0026135(Zeb2),MGP_C57BL6NJ_G0033450(Prkcb),MGP_C57BL6NJ_G0034792(N…
BP	GO:0010810	regulation of cell-substrate adhesion	3	171	0.02224	0.209863	MGP_C57BL6NJ_G0020849(Rreb1),MGP_C57BL6NJ_G0028281(Ap1ar),MGP_C57BL6NJ_G0034792(Nrp1)
MF	GO:0001067	regulatory region nucleic acid binding	7	792	0.02233	0.209863	MGP_C57BL6NJ_G0016210(St18),MGP_C57BL6NJ_G0016429(Satb2),MGP_C57BL6NJ_G0020351(Batf),MGP_C57BL6NJ_G0020849(Rreb1),MGP_C57BL6NJ_G0022517(Mkl1),MGP_C57BL6NJ_G0035015(Fli1),MGP_C57BL6NJ_G0035508(Rfx7)
BP	GO:0002312	B cell activation involved in immune response	2	66	0.02253	0.209863	MGP_C57BL6NJ_G0020351(Batf),MGP_C57BL6NJ_G0024287(Plcl2)
MF	GO:0005200	structural constituent of cytoskeleton	2	65	0.02262	0.209863	MGP_C57BL6NJ_G0024409(Myom1),MGP_C57BL6NJ_G0029285(Epb41)
BP	GO:0021953	central nervous system neuron differentiation	3	173	0.02292	0.209863	MGP_C57BL6NJ_G0016429(Satb2),MGP_C57BL6NJ_G0026135(Zeb2),MGP_C57BL6NJ_G0034792(Nrp1)
BP	GO:0006942	regulation of striated muscle contraction	2	67	0.02317	0.209863	MGP_C57BL6NJ_G0021900(Adra1a),MGP_C57BL6NJ_G0024426(Ehd3)
BP	GO:0009156	ribonucleoside monophosphate biosynthetic process	2	67	0.02317	0.209863	MGP_C57BL6NJ_G0016617(Pid1),MGP_C57BL6NJ_G0026261(Atp5g3)
BP	GO:0032989	cellular component morphogenesis	8	1004	0.02354	0.209863	MGP_C57BL6NJ_G0016617(Pid1),MGP_C57BL6NJ_G0020849(Rreb1),MGP_C57BL6NJ_G0024409(Myom1),MGP_C57BL6NJ_G0024850(Csnk1g3),MGP_C57BL6NJ_G0026135(Zeb2),MGP_C57BL6NJ_G0028281(Ap1ar),MGP_C57BL6NJ_G0029285(Epb41),MGP_C57BL6NJ_G0034792(Nrp1)
BP	GO:0050794	regulation of cellular process	42	9658	0.02384	0.209863	MGP_C57BL6NJ_G0016210(St18),MGP_C57BL6NJ_G0016429(Satb2),MGP_C57BL6NJ_G0016617(Pid1),MGP_C57BL6NJ_G0016967(Trove2),MGP_C57BL6NJ_G0016986(Fam129a),MGP_C57BL6NJ_G0017366(Cd34),MGP_C57BL6NJ_G0017454(Pde7b),MGP_C57BL6NJ_G0018428(Tns3),MGP_C57BL6NJ_G0019711(Pitpnc1),MGP_C57BL6NJ_G0020351(Batf),MGP_C57BL6NJ_G0020402(Efcab11),MGP_C57BL6NJ_G0020849(Rreb1),MGP_C57BL6NJ_G0021322(Il6st),MGP_C57BL6NJ_G002158…
CC	GO:0005816	spindle pole body	1	7	0.0239	0.209863	MGP_C57BL6NJ_G0020402(Efcab11)
BP	GO:0006930	substrate-dependent cell migration, cell extension	1	7	0.02433	0.209863	MGP_C57BL6NJ_G0034792(Nrp1)
BP	GO:0007016	cytoskeletal anchoring at plasma membrane	1	7	0.02433	0.209863	MGP_C57BL6NJ_G0029285(Epb41)
BP	GO:0021902	commitment of neuronal cell to specific neuron type in forebrain	1	7	0.02433	0.209863	MGP_C57BL6NJ_G0016429(Satb2)
BP	GO:0021957	corticospinal tract morphogenesis	1	7	0.02433	0.209863	MGP_C57BL6NJ_G0026135(Zeb2)
BP	GO:0021979	hypothalamus cell differentiation	1	7	0.02433	0.209863	MGP_C57BL6NJ_G0034792(Nrp1)
BP	GO:0030241	skeletal muscle myosin thick filament assembly	1	7	0.02433	0.209863	MGP_C57BL6NJ_G0024409(Myom1)
BP	GO:0034091	regulation of maintenance of sister chromatid cohesion	1	7	0.02433	0.209863	MGP_C57BL6NJ_G0022290(Nsmce2)
BP	GO:0045634	regulation of melanocyte differentiation	1	7	0.02433	0.209863	MGP_C57BL6NJ_G0026135(Zeb2)
BP	GO:0048021	regulation of melanin biosynthetic process	1	7	0.02433	0.209863	MGP_C57BL6NJ_G0026135(Zeb2)
BP	GO:0050942	positive regulation of pigment cell differentiation	1	7	0.02433	0.209863	MGP_C57BL6NJ_G0026135(Zeb2)
BP	GO:0051300	spindle pole body organization	1	7	0.02433	0.209863	MGP_C57BL6NJ_G0020402(Efcab11)
BP	GO:1900376	regulation of secondary metabolite biosynthetic process	1	7	0.02433	0.209863	MGP_C57BL6NJ_G0026135(Zeb2)
BP	GO:1901166	neural crest cell migration involved in autonomic nervous system development	1	7	0.02433	0.209863	MGP_C57BL6NJ_G0034792(Nrp1)
BP	GO:1902101	positive regulation of metaphase/anaphase transition of cell cycle	1	7	0.02433	0.209863	MGP_C57BL6NJ_G0022290(Nsmce2)
BP	GO:1902946	protein localization to early endosome	1	7	0.02433	0.209863	MGP_C57BL6NJ_G0034792(Nrp1)
BP	GO:1904776	regulation of protein localization to cell cortex	1	7	0.02433	0.209863	MGP_C57BL6NJ_G0029285(Epb41)
BP	GO:2001214	positive regulation of vasculogenesis	1	7	0.02433	0.209863	MGP_C57BL6NJ_G0017366(Cd34)
BP	GO:2001269	positive regulation of cysteine-type endopeptidase activity involved in apoptotic signaling pathway	1	7	0.02433	0.209863	MGP_C57BL6NJ_G0016210(St18)
BP	GO:0021954	central nervous system neuron development	2	69	0.02448	0.209863	MGP_C57BL6NJ_G0026135(Zeb2),MGP_C57BL6NJ_G0034792(Nrp1)
BP	GO:1900076	regulation of cellular response to insulin stimulus	2	69	0.02448	0.209863	MGP_C57BL6NJ_G0016617(Pid1),MGP_C57BL6NJ_G0033450(Prkcb)
MF	GO:0004571	mannosyl-oligosaccharide 1,2-alpha-mannosidase activity	1	7	0.02475	0.209912	MGP_C57BL6NJ_G0028083(Man1a2)
MF	GO:0005138	interleukin-6 receptor binding	1	7	0.02475	0.209912	MGP_C57BL6NJ_G0021322(Il6st)
MF	GO:0071933	Arp2/3 complex binding	1	7	0.02475	0.209912	MGP_C57BL6NJ_G0028281(Ap1ar)
BP	GO:0048731	system development	21	3948	0.02481	0.209912	MGP_C57BL6NJ_G0016429(Satb2),MGP_C57BL6NJ_G0016967(Trove2),MGP_C57BL6NJ_G0017366(Cd34),MGP_C57BL6NJ_G0018428(Tns3),MGP_C57BL6NJ_G0020351(Batf),MGP_C57BL6NJ_G0020849(Rreb1),MGP_C57BL6NJ_G0021322(Il6st),MGP_C57BL6NJ_G0021900(Adra1a),MGP_C57BL6NJ_G0021963(Itm2b),MGP_C57BL6NJ_G0022301(Asap1),MGP_C57BL6NJ_G0022517(Mkl1),MGP_C57BL6NJ_G0024287(Plcl2),MGP_C57BL6NJ_G0024409(Myom1),MGP_C57BL6NJ_G0024539(Ra…
MF	GO:0008092	cytoskeletal protein binding	7	813	0.02533	0.213069	MGP_C57BL6NJ_G0020259(Gphn),MGP_C57BL6NJ_G0020402(Efcab11),MGP_C57BL6NJ_G0021906(Ppp2r2a),MGP_C57BL6NJ_G0022517(Mkl1),MGP_C57BL6NJ_G0024409(Myom1),MGP_C57BL6NJ_G0028281(Ap1ar),MGP_C57BL6NJ_G0029285(Epb41)
BP	GO:0001649	osteoblast differentiation	3	180	0.02539	0.213069	MGP_C57BL6NJ_G0016429(Satb2),MGP_C57BL6NJ_G0021322(Il6st),MGP_C57BL6NJ_G0035602(Syncrip)
BP	GO:0030900	forebrain development	4	318	0.02543	0.213069	MGP_C57BL6NJ_G0016429(Satb2),MGP_C57BL6NJ_G0022517(Mkl1),MGP_C57BL6NJ_G0026135(Zeb2),MGP_C57BL6NJ_G0034792(Nrp1)
BP	GO:0060249	anatomical structure homeostasis	4	320	0.02594	0.216641	MGP_C57BL6NJ_G0017366(Cd34),MGP_C57BL6NJ_G0021878(Hmbox1),MGP_C57BL6NJ_G0022290(Nsmce2),MGP_C57BL6NJ_G0034287(Large)
BP	GO:0051254	positive regulation of RNA metabolic process	10	1428	0.02609	0.217193	MGP_C57BL6NJ_G0016210(St18),MGP_C57BL6NJ_G0016429(Satb2),MGP_C57BL6NJ_G0016617(Pid1),MGP_C57BL6NJ_G0020351(Batf),MGP_C57BL6NJ_G0020849(Rreb1),MGP_C57BL6NJ_G0021878(Hmbox1),MGP_C57BL6NJ_G0022517(Mkl1),MGP_C57BL6NJ_G0026135(Zeb2),MGP_C57BL6NJ_G0033450(Prkcb),MGP_C57BL6NJ_G0035015(Fli1)
BP	GO:0048863	stem cell differentiation	3	185	0.02725	0.21956	MGP_C57BL6NJ_G0020351(Batf),MGP_C57BL6NJ_G0026135(Zeb2),MGP_C57BL6NJ_G0034792(Nrp1)
CC	GO:0001527	microfibril	1	8	0.0273	0.21956	MGP_C57BL6NJ_G0031664(Mfap5)
CC	GO:0005883	neurofilament	1	8	0.0273	0.21956	MGP_C57BL6NJ_G0034792(Nrp1)
MF	GO:0003700	DNA binding transcription factor activity	8	1018	0.02773	0.21956	MGP_C57BL6NJ_G0016210(St18),MGP_C57BL6NJ_G0016429(Satb2),MGP_C57BL6NJ_G0020351(Batf),MGP_C57BL6NJ_G0020849(Rreb1),MGP_C57BL6NJ_G0022517(Mkl1),MGP_C57BL6NJ_G0026135(Zeb2),MGP_C57BL6NJ_G0035015(Fli1),MGP_C57BL6NJ_G0035508(Rfx7)
MF	GO:0000977	RNA polymerase II regulatory region sequence-specific DNA binding	6	648	0.02776	0.21956	MGP_C57BL6NJ_G0016210(St18),MGP_C57BL6NJ_G0016429(Satb2),MGP_C57BL6NJ_G0020351(Batf),MGP_C57BL6NJ_G0020849(Rreb1),MGP_C57BL6NJ_G0035015(Fli1),MGP_C57BL6NJ_G0035508(Rfx7)
BP	GO:0021562	vestibulocochlear nerve development	1	8	0.02776	0.21956	MGP_C57BL6NJ_G0034792(Nrp1)
BP	GO:0048087	positive regulation of developmental pigmentation	1	8	0.02776	0.21956	MGP_C57BL6NJ_G0026135(Zeb2)
BP	GO:0060982	coronary artery morphogenesis	1	8	0.02776	0.21956	MGP_C57BL6NJ_G0034792(Nrp1)
BP	GO:0098953	receptor diffusion trapping	1	8	0.02776	0.21956	MGP_C57BL6NJ_G0020259(Gphn)
BP	GO:0098970	postsynaptic neurotransmitter receptor diffusion trapping	1	8	0.02776	0.21956	MGP_C57BL6NJ_G0020259(Gphn)
BP	GO:0099628	neurotransmitter receptor diffusion trapping	1	8	0.02776	0.21956	MGP_C57BL6NJ_G0020259(Gphn)
BP	GO:1900040	regulation of interleukin-2 secretion	1	8	0.02776	0.21956	MGP_C57BL6NJ_G0017366(Cd34)
BP	GO:1900122	positive regulation of receptor binding	1	8	0.02776	0.21956	MGP_C57BL6NJ_G0024287(Plcl2)
BP	GO:1905820	positive regulation of chromosome separation	1	8	0.02776	0.21956	MGP_C57BL6NJ_G0022290(Nsmce2)
BP	GO:2001171	positive regulation of ATP biosynthetic process	1	8	0.02776	0.21956	MGP_C57BL6NJ_G0016617(Pid1)
BP	GO:0055013	cardiac muscle cell development	2	74	0.02787	0.21956	MGP_C57BL6NJ_G0021900(Adra1a),MGP_C57BL6NJ_G0024409(Myom1)
MF	GO:0004115	3',5'-cyclic-AMP phosphodiesterase activity	1	8	0.02824	0.21956	MGP_C57BL6NJ_G0017454(Pde7b)
MF	GO:0008526	phosphatidylinositol transporter activity	1	8	0.02824	0.21956	MGP_C57BL6NJ_G0019711(Pitpnc1)
MF	GO:0015924	mannosyl-oligosaccharide mannosidase activity	1	8	0.02824	0.21956	MGP_C57BL6NJ_G0028083(Man1a2)
MF	GO:0016661	oxidoreductase activity, acting on other nitrogenous compounds as donors	1	8	0.02824	0.21956	MGP_C57BL6NJ_G0020259(Gphn)
MF	GO:0042285	xylosyltransferase activity	1	8	0.02824	0.21956	MGP_C57BL6NJ_G0034287(Large)
MF	GO:0043546	molybdopterin cofactor binding	1	8	0.02824	0.21956	MGP_C57BL6NJ_G0020259(Gphn)
BP	GO:0006892	post-Golgi vesicle-mediated transport	2	75	0.02857	0.220799	MGP_C57BL6NJ_G0024426(Ehd3),MGP_C57BL6NJ_G0028281(Ap1ar)
BP	GO:0014032	neural crest cell development	2	75	0.02857	0.220799	MGP_C57BL6NJ_G0026135(Zeb2),MGP_C57BL6NJ_G0034792(Nrp1)
MF	GO:0001012	RNA polymerase II regulatory region DNA binding	6	653	0.02868	0.22099	MGP_C57BL6NJ_G0016210(St18),MGP_C57BL6NJ_G0016429(Satb2),MGP_C57BL6NJ_G0020351(Batf),MGP_C57BL6NJ_G0020849(Rreb1),MGP_C57BL6NJ_G0035015(Fli1),MGP_C57BL6NJ_G0035508(Rfx7)
BP	GO:0046578	regulation of Ras protein signal transduction	3	189	0.02878	0.221102	MGP_C57BL6NJ_G0021900(Adra1a),MGP_C57BL6NJ_G0026118(Dennd1a),MGP_C57BL6NJ_G0034792(Nrp1)
BP	GO:0045944	positive regulation of transcription from RNA polymerase II promoter	8	1044	0.02888	0.221214	MGP_C57BL6NJ_G0016210(St18),MGP_C57BL6NJ_G0016429(Satb2),MGP_C57BL6NJ_G0016617(Pid1),MGP_C57BL6NJ_G0020351(Batf),MGP_C57BL6NJ_G0020849(Rreb1),MGP_C57BL6NJ_G0022517(Mkl1),MGP_C57BL6NJ_G0026135(Zeb2),MGP_C57BL6NJ_G0035015(Fli1)
BP	GO:0009124	nucleoside monophosphate biosynthetic process	2	76	0.02927	0.22354	MGP_C57BL6NJ_G0016617(Pid1),MGP_C57BL6NJ_G0026261(Atp5g3)
MF	GO:0008081	phosphoric diester hydrolase activity	2	75	0.0295	0.224634	MGP_C57BL6NJ_G0017454(Pde7b),MGP_C57BL6NJ_G0024287(Plcl2)
CC	GO:0044424	intracellular part	47	11548	0.0306	0.22548	MGP_C57BL6NJ_G0016210(St18),MGP_C57BL6NJ_G0016429(Satb2),MGP_C57BL6NJ_G0016617(Pid1),MGP_C57BL6NJ_G0016967(Trove2),MGP_C57BL6NJ_G0016986(Fam129a),MGP_C57BL6NJ_G0017366(Cd34),MGP_C57BL6NJ_G0018428(Tns3),MGP_C57BL6NJ_G0019711(Pitpnc1),MGP_C57BL6NJ_G0019782(Armc7),MGP_C57BL6NJ_G0020259(Gphn),MGP_C57BL6NJ_G0020351(Batf),MGP_C57BL6NJ_G0020402(Efcab11),MGP_C57BL6NJ_G0020849(Rreb1),MGP_C57BL6NJ_G0021878…
CC	GO:0044444	cytoplasmic part	32	7059	0.0307	0.22548	MGP_C57BL6NJ_G0016967(Trove2),MGP_C57BL6NJ_G0016986(Fam129a),MGP_C57BL6NJ_G0017366(Cd34),MGP_C57BL6NJ_G0018428(Tns3),MGP_C57BL6NJ_G0020259(Gphn),MGP_C57BL6NJ_G0020402(Efcab11),MGP_C57BL6NJ_G0021878(Hmbox1),MGP_C57BL6NJ_G0021900(Adra1a),MGP_C57BL6NJ_G0021906(Ppp2r2a),MGP_C57BL6NJ_G0021924(Gm21685),MGP_C57BL6NJ_G0021963(Itm2b),MGP_C57BL6NJ_G0022301(Asap1),MGP_C57BL6NJ_G0022517(Mkl1),MGP_C57BL6NJ_G0…
BP	GO:0021612	facial nerve structural organization	1	9	0.03117	0.22548	MGP_C57BL6NJ_G0034792(Nrp1)
BP	GO:0021800	cerebral cortex tangential migration	1	9	0.03117	0.22548	MGP_C57BL6NJ_G0034792(Nrp1)
BP	GO:0033601	positive regulation of mammary gland epithelial cell proliferation	1	9	0.03117	0.22548	MGP_C57BL6NJ_G0020849(Rreb1)
BP	GO:0034088	maintenance of mitotic sister chromatid cohesion	1	9	0.03117	0.22548	MGP_C57BL6NJ_G0022290(Nsmce2)
BP	GO:0042482	positive regulation of odontogenesis	1	9	0.03117	0.22548	MGP_C57BL6NJ_G0017366(Cd34)
BP	GO:0045876	positive regulation of sister chromatid cohesion	1	9	0.03117	0.22548	MGP_C57BL6NJ_G0022290(Nsmce2)
BP	GO:0048012	hepatocyte growth factor receptor signaling pathway	1	9	0.03117	0.22548	MGP_C57BL6NJ_G0034792(Nrp1)
BP	GO:0050932	regulation of pigment cell differentiation	1	9	0.03117	0.22548	MGP_C57BL6NJ_G0026135(Zeb2)
BP	GO:0061299	retina vasculature morphogenesis in camera-type eye	1	9	0.03117	0.22548	MGP_C57BL6NJ_G0034792(Nrp1)
BP	GO:0061549	sympathetic ganglion development	1	9	0.03117	0.22548	MGP_C57BL6NJ_G0034792(Nrp1)
BP	GO:0071688	striated muscle myosin thick filament assembly	1	9	0.03117	0.22548	MGP_C57BL6NJ_G0024409(Myom1)
BP	GO:1900038	negative regulation of cellular response to hypoxia	1	9	0.03117	0.22548	MGP_C57BL6NJ_G0017366(Cd34)
BP	GO:1903729	regulation of plasma membrane organization	1	9	0.03117	0.22548	MGP_C57BL6NJ_G0022301(Asap1)
BP	GO:2000392	regulation of lamellipodium morphogenesis	1	9	0.03117	0.22548	MGP_C57BL6NJ_G0020849(Rreb1)
BP	GO:2001169	regulation of ATP biosynthetic process	1	9	0.03117	0.22548	MGP_C57BL6NJ_G0016617(Pid1)
BP	GO:0001570	vasculogenesis	2	79	0.03144	0.22548	MGP_C57BL6NJ_G0017366(Cd34),MGP_C57BL6NJ_G0034792(Nrp1)
BP	GO:0014031	mesenchymal cell development	2	79	0.03144	0.22548	MGP_C57BL6NJ_G0026135(Zeb2),MGP_C57BL6NJ_G0034792(Nrp1)
BP	GO:0050772	positive regulation of axonogenesis	2	79	0.03144	0.22548	MGP_C57BL6NJ_G0026135(Zeb2),MGP_C57BL6NJ_G0034792(Nrp1)
BP	GO:0055006	cardiac cell development	2	79	0.03144	0.22548	MGP_C57BL6NJ_G0021900(Adra1a),MGP_C57BL6NJ_G0024409(Myom1)
MF	GO:0003691	double-stranded telomeric DNA binding	1	9	0.03171	0.225542	MGP_C57BL6NJ_G0021878(Hmbox1)
MF	GO:0004955	prostaglandin receptor activity	1	9	0.03171	0.225542	MGP_C57BL6NJ_G0021587(Ptger2)
MF	GO:0098879	structural constituent of postsynaptic specialization	1	9	0.03171	0.225542	MGP_C57BL6NJ_G0020259(Gphn)
BP	GO:0031328	positive regulation of cellular biosynthetic process	11	1693	0.03216	0.226678	MGP_C57BL6NJ_G0016210(St18),MGP_C57BL6NJ_G0016429(Satb2),MGP_C57BL6NJ_G0016617(Pid1),MGP_C57BL6NJ_G0016986(Fam129a),MGP_C57BL6NJ_G0020351(Batf),MGP_C57BL6NJ_G0020849(Rreb1),MGP_C57BL6NJ_G0021878(Hmbox1),MGP_C57BL6NJ_G0022517(Mkl1),MGP_C57BL6NJ_G0026135(Zeb2),MGP_C57BL6NJ_G0033450(Prkcb),MGP_C57BL6NJ_G0035015(Fli1)
BP	GO:0048864	stem cell development	2	80	0.03217	0.226678	MGP_C57BL6NJ_G0026135(Zeb2),MGP_C57BL6NJ_G0034792(Nrp1)
BP	GO:1903524	positive regulation of blood circulation	2	80	0.03217	0.226678	MGP_C57BL6NJ_G0021587(Ptger2),MGP_C57BL6NJ_G0021900(Adra1a)
BP	GO:0065007	biological regulation	45	10710	0.03222	0.226678	MGP_C57BL6NJ_G0016210(St18),MGP_C57BL6NJ_G0016429(Satb2),MGP_C57BL6NJ_G0016617(Pid1),MGP_C57BL6NJ_G0016967(Trove2),MGP_C57BL6NJ_G0016986(Fam129a),MGP_C57BL6NJ_G0017366(Cd34),MGP_C57BL6NJ_G0017454(Pde7b),MGP_C57BL6NJ_G0018428(Tns3),MGP_C57BL6NJ_G0019711(Pitpnc1),MGP_C57BL6NJ_G0020259(Gphn),MGP_C57BL6NJ_G0020351(Batf),MGP_C57BL6NJ_G0020402(Efcab11),MGP_C57BL6NJ_G0020849(Rreb1),MGP_C57BL6NJ_G0021322…
BP	GO:0014033	neural crest cell differentiation	2	81	0.03291	0.229683	MGP_C57BL6NJ_G0026135(Zeb2),MGP_C57BL6NJ_G0034792(Nrp1)
BP	GO:0007265	Ras protein signal transduction	4	346	0.03322	0.229683	MGP_C57BL6NJ_G0021900(Adra1a),MGP_C57BL6NJ_G0024539(Rab18),MGP_C57BL6NJ_G0026118(Dennd1a),MGP_C57BL6NJ_G0034792(Nrp1)
BP	GO:0006875	cellular metal ion homeostasis	5	511	0.03338	0.229683	MGP_C57BL6NJ_G0021322(Il6st),MGP_C57BL6NJ_G0021587(Ptger2),MGP_C57BL6NJ_G0021900(Adra1a),MGP_C57BL6NJ_G0033450(Prkcb),MGP_C57BL6NJ_G0036487(Abcb7)
BP	GO:0006357	regulation of transcription from RNA polymerase II promoter	11	1705	0.03363	0.229683	MGP_C57BL6NJ_G0016210(St18),MGP_C57BL6NJ_G0016429(Satb2),MGP_C57BL6NJ_G0016617(Pid1),MGP_C57BL6NJ_G0020351(Batf),MGP_C57BL6NJ_G0020849(Rreb1),MGP_C57BL6NJ_G0021878(Hmbox1),MGP_C57BL6NJ_G0022517(Mkl1),MGP_C57BL6NJ_G0026135(Zeb2),MGP_C57BL6NJ_G0033450(Prkcb),MGP_C57BL6NJ_G0035015(Fli1),MGP_C57BL6NJ_G0035508(Rfx7)
BP	GO:0048870	cell motility	9	1283	0.03415	0.229683	MGP_C57BL6NJ_G0016429(Satb2),MGP_C57BL6NJ_G0017366(Cd34),MGP_C57BL6NJ_G0018428(Tns3),MGP_C57BL6NJ_G0020849(Rreb1),MGP_C57BL6NJ_G0021322(Il6st),MGP_C57BL6NJ_G0022517(Mkl1),MGP_C57BL6NJ_G0026135(Zeb2),MGP_C57BL6NJ_G0028281(Ap1ar),MGP_C57BL6NJ_G0034792(Nrp1)
BP	GO:0051674	localization of cell	9	1283	0.03415	0.229683	MGP_C57BL6NJ_G0016429(Satb2),MGP_C57BL6NJ_G0017366(Cd34),MGP_C57BL6NJ_G0018428(Tns3),MGP_C57BL6NJ_G0020849(Rreb1),MGP_C57BL6NJ_G0021322(Il6st),MGP_C57BL6NJ_G0022517(Mkl1),MGP_C57BL6NJ_G0026135(Zeb2),MGP_C57BL6NJ_G0028281(Ap1ar),MGP_C57BL6NJ_G0034792(Nrp1)
BP	GO:0006198	cAMP catabolic process	1	10	0.03458	0.229683	MGP_C57BL6NJ_G0017454(Pde7b)
BP	GO:0010459	negative regulation of heart rate	1	10	0.03458	0.229683	MGP_C57BL6NJ_G0021900(Adra1a)
BP	GO:0021559	trigeminal nerve development	1	10	0.03458	0.229683	MGP_C57BL6NJ_G0034792(Nrp1)
BP	GO:0031034	myosin filament assembly	1	10	0.03458	0.229683	MGP_C57BL6NJ_G0024409(Myom1)
BP	GO:0032488	Cdc42 protein signal transduction	1	10	0.03458	0.229683	MGP_C57BL6NJ_G0034792(Nrp1)
BP	GO:0034086	maintenance of sister chromatid cohesion	1	10	0.03458	0.229683	MGP_C57BL6NJ_G0022290(Nsmce2)
BP	GO:0042983	amyloid precursor protein biosynthetic process	1	10	0.03458	0.229683	MGP_C57BL6NJ_G0021963(Itm2b)
BP	GO:0042984	regulation of amyloid precursor protein biosynthetic process	1	10	0.03458	0.229683	MGP_C57BL6NJ_G0021963(Itm2b)
BP	GO:0070262	peptidyl-serine dephosphorylation	1	10	0.03458	0.229683	MGP_C57BL6NJ_G0021906(Ppp2r2a)
BP	GO:0070970	interleukin-2 secretion	1	10	0.03458	0.229683	MGP_C57BL6NJ_G0017366(Cd34)
BP	GO:0071679	commissural neuron axon guidance	1	10	0.03458	0.229683	MGP_C57BL6NJ_G0034792(Nrp1)
BP	GO:1901387	positive regulation of voltage-gated calcium channel activity	1	10	0.03458	0.229683	MGP_C57BL6NJ_G0024426(Ehd3)
BP	GO:2001212	regulation of vasculogenesis	1	10	0.03458	0.229683	MGP_C57BL6NJ_G0017366(Cd34)
BP	GO:1903522	regulation of blood circulation	3	204	0.03493	0.229683	MGP_C57BL6NJ_G0021587(Ptger2),MGP_C57BL6NJ_G0021900(Adra1a),MGP_C57BL6NJ_G0024426(Ehd3)
BP	GO:0048513	animal organ development	16	2859	0.03496	0.229683	MGP_C57BL6NJ_G0016429(Satb2),MGP_C57BL6NJ_G0017366(Cd34),MGP_C57BL6NJ_G0018428(Tns3),MGP_C57BL6NJ_G0020351(Batf),MGP_C57BL6NJ_G0020849(Rreb1),MGP_C57BL6NJ_G0021900(Adra1a),MGP_C57BL6NJ_G0022517(Mkl1),MGP_C57BL6NJ_G0024287(Plcl2),MGP_C57BL6NJ_G0024409(Myom1),MGP_C57BL6NJ_G0024539(Rab18),MGP_C57BL6NJ_G0026135(Zeb2),MGP_C57BL6NJ_G0028083(Man1a2),MGP_C57BL6NJ_G0031664(Mfap5),MGP_C57BL6NJ_G0034287(Lar…
MF	GO:0004954	prostanoid receptor activity	1	10	0.03517	0.229683	MGP_C57BL6NJ_G0021587(Ptger2)
BP	GO:0010771	negative regulation of cell morphogenesis involved in differentiation	2	84	0.03518	0.229683	MGP_C57BL6NJ_G0028281(Ap1ar),MGP_C57BL6NJ_G0034792(Nrp1)
BP	GO:0023052	signaling	28	5908	0.03574	0.229683	MGP_C57BL6NJ_G0016210(St18),MGP_C57BL6NJ_G0016617(Pid1),MGP_C57BL6NJ_G0016967(Trove2),MGP_C57BL6NJ_G0017366(Cd34),MGP_C57BL6NJ_G0017454(Pde7b),MGP_C57BL6NJ_G0019711(Pitpnc1),MGP_C57BL6NJ_G0020351(Batf),MGP_C57BL6NJ_G0020402(Efcab11),MGP_C57BL6NJ_G0020849(Rreb1),MGP_C57BL6NJ_G0021322(Il6st),MGP_C57BL6NJ_G0021587(Ptger2),MGP_C57BL6NJ_G0021900(Adra1a),MGP_C57BL6NJ_G0021963(Itm2b),MGP_C57BL6NJ_G00225…
BP	GO:0009205	purine ribonucleoside triphosphate metabolic process	3	206	0.0358	0.229683	MGP_C57BL6NJ_G0016617(Pid1),MGP_C57BL6NJ_G0020259(Gphn),MGP_C57BL6NJ_G0026261(Atp5g3)
BP	GO:0042113	B cell activation	3	206	0.0358	0.229683	MGP_C57BL6NJ_G0020351(Batf),MGP_C57BL6NJ_G0024287(Plcl2),MGP_C57BL6NJ_G0033450(Prkcb)
BP	GO:0048588	developmental cell growth	3	206	0.0358	0.229683	MGP_C57BL6NJ_G0021900(Adra1a),MGP_C57BL6NJ_G0026135(Zeb2),MGP_C57BL6NJ_G0034792(Nrp1)
CC	GO:0005829	cytosol	16	2923	0.0359	0.229683	MGP_C57BL6NJ_G0016967(Trove2),MGP_C57BL6NJ_G0016986(Fam129a),MGP_C57BL6NJ_G0018428(Tns3),MGP_C57BL6NJ_G0020259(Gphn),MGP_C57BL6NJ_G0021878(Hmbox1),MGP_C57BL6NJ_G0021906(Ppp2r2a),MGP_C57BL6NJ_G0022301(Asap1),MGP_C57BL6NJ_G0022517(Mkl1),MGP_C57BL6NJ_G0024426(Ehd3),MGP_C57BL6NJ_G0026118(Dennd1a),MGP_C57BL6NJ_G0026135(Zeb2),MGP_C57BL6NJ_G0028281(Ap1ar),MGP_C57BL6NJ_G0029285(Epb41),MGP_C57BL6NJ_G00334…
BP	GO:0010827	regulation of glucose transport	2	85	0.03594	0.229683	MGP_C57BL6NJ_G0016617(Pid1),MGP_C57BL6NJ_G0033450(Prkcb)
MF	GO:0005488	binding	48	11495	0.03599	0.229683	MGP_C57BL6NJ_G0016210(St18),MGP_C57BL6NJ_G0016429(Satb2),MGP_C57BL6NJ_G0016617(Pid1),MGP_C57BL6NJ_G0016967(Trove2),MGP_C57BL6NJ_G0017366(Cd34),MGP_C57BL6NJ_G0017454(Pde7b),MGP_C57BL6NJ_G0018462(Lgalsl),MGP_C57BL6NJ_G0019711(Pitpnc1),MGP_C57BL6NJ_G0019782(Armc7),MGP_C57BL6NJ_G0020259(Gphn),MGP_C57BL6NJ_G0020351(Batf),MGP_C57BL6NJ_G0020402(Efcab11),MGP_C57BL6NJ_G0020849(Rreb1),MGP_C57BL6NJ_G0021322…
BP	GO:0051650	establishment of vesicle localization	3	207	0.03624	0.229683	MGP_C57BL6NJ_G0021900(Adra1a),MGP_C57BL6NJ_G0026118(Dennd1a),MGP_C57BL6NJ_G0028281(Ap1ar)
MF	GO:0051219	phosphoprotein binding	2	84	0.03631	0.229683	MGP_C57BL6NJ_G0024850(Csnk1g3),MGP_C57BL6NJ_G0029285(Epb41)
BP	GO:0007417	central nervous system development	6	704	0.03654	0.229683	MGP_C57BL6NJ_G0016429(Satb2),MGP_C57BL6NJ_G0021322(Il6st),MGP_C57BL6NJ_G0022517(Mkl1),MGP_C57BL6NJ_G0024539(Rab18),MGP_C57BL6NJ_G0026135(Zeb2),MGP_C57BL6NJ_G0034792(Nrp1)
BP	GO:0006796	phosphate-containing compound metabolic process	15	2639	0.03665	0.229683	MGP_C57BL6NJ_G0016617(Pid1),MGP_C57BL6NJ_G0016986(Fam129a),MGP_C57BL6NJ_G0017454(Pde7b),MGP_C57BL6NJ_G0019711(Pitpnc1),MGP_C57BL6NJ_G0020259(Gphn),MGP_C57BL6NJ_G0021322(Il6st),MGP_C57BL6NJ_G0021900(Adra1a),MGP_C57BL6NJ_G0021906(Ppp2r2a),MGP_C57BL6NJ_G0024287(Plcl2),MGP_C57BL6NJ_G0024850(Csnk1g3),MGP_C57BL6NJ_G0026135(Zeb2),MGP_C57BL6NJ_G0026261(Atp5g3),MGP_C57BL6NJ_G0030171(Cdkl2),MGP_C57BL6NJ_G0…
BP	GO:0021761	limbic system development	2	86	0.03672	0.229683	MGP_C57BL6NJ_G0026135(Zeb2),MGP_C57BL6NJ_G0034792(Nrp1)
BP	GO:0009891	positive regulation of biosynthetic process	11	1729	0.03673	0.229683	MGP_C57BL6NJ_G0016210(St18),MGP_C57BL6NJ_G0016429(Satb2),MGP_C57BL6NJ_G0016617(Pid1),MGP_C57BL6NJ_G0016986(Fam129a),MGP_C57BL6NJ_G0020351(Batf),MGP_C57BL6NJ_G0020849(Rreb1),MGP_C57BL6NJ_G0021878(Hmbox1),MGP_C57BL6NJ_G0022517(Mkl1),MGP_C57BL6NJ_G0026135(Zeb2),MGP_C57BL6NJ_G0033450(Prkcb),MGP_C57BL6NJ_G0035015(Fli1)
BP	GO:0051130	positive regulation of cellular component organization	8	1095	0.03685	0.229683	MGP_C57BL6NJ_G0020849(Rreb1),MGP_C57BL6NJ_G0021878(Hmbox1),MGP_C57BL6NJ_G0022290(Nsmce2),MGP_C57BL6NJ_G0022301(Asap1),MGP_C57BL6NJ_G0026135(Zeb2),MGP_C57BL6NJ_G0028281(Ap1ar),MGP_C57BL6NJ_G0030171(Cdkl2),MGP_C57BL6NJ_G0034792(Nrp1)
MF	GO:0000981	RNA polymerase II transcription factor activity, sequence-specific DNA binding	6	695	0.03723	0.229683	MGP_C57BL6NJ_G0016210(St18),MGP_C57BL6NJ_G0016429(Satb2),MGP_C57BL6NJ_G0020351(Batf),MGP_C57BL6NJ_G0020849(Rreb1),MGP_C57BL6NJ_G0026135(Zeb2),MGP_C57BL6NJ_G0035015(Fli1)
BP	GO:0045893	positive regulation of transcription, DNA-templated	9	1305	0.03749	0.229683	MGP_C57BL6NJ_G0016210(St18),MGP_C57BL6NJ_G0016429(Satb2),MGP_C57BL6NJ_G0016617(Pid1),MGP_C57BL6NJ_G0020351(Batf),MGP_C57BL6NJ_G0020849(Rreb1),MGP_C57BL6NJ_G0021878(Hmbox1),MGP_C57BL6NJ_G0022517(Mkl1),MGP_C57BL6NJ_G0026135(Zeb2),MGP_C57BL6NJ_G0035015(Fli1)
BP	GO:0065008	regulation of biological quality	17	3124	0.03754	0.229683	MGP_C57BL6NJ_G0016617(Pid1),MGP_C57BL6NJ_G0017366(Cd34),MGP_C57BL6NJ_G0020259(Gphn),MGP_C57BL6NJ_G0021322(Il6st),MGP_C57BL6NJ_G0021587(Ptger2),MGP_C57BL6NJ_G0021878(Hmbox1),MGP_C57BL6NJ_G0021900(Adra1a),MGP_C57BL6NJ_G0022290(Nsmce2),MGP_C57BL6NJ_G0024426(Ehd3),MGP_C57BL6NJ_G0024850(Csnk1g3),MGP_C57BL6NJ_G0028281(Ap1ar),MGP_C57BL6NJ_G0029285(Epb41),MGP_C57BL6NJ_G0033450(Prkcb),MGP_C57BL6NJ_G003428…
BP	GO:0007420	brain development	5	529	0.03788	0.229683	MGP_C57BL6NJ_G0016429(Satb2),MGP_C57BL6NJ_G0022517(Mkl1),MGP_C57BL6NJ_G0024539(Rab18),MGP_C57BL6NJ_G0026135(Zeb2),MGP_C57BL6NJ_G0034792(Nrp1)
BP	GO:0006264	mitochondrial DNA replication	1	11	0.03797	0.229683	MGP_C57BL6NJ_G0016617(Pid1)
BP	GO:0006896	Golgi to vacuole transport	1	11	0.03797	0.229683	MGP_C57BL6NJ_G0024426(Ehd3)
BP	GO:0010561	negative regulation of glycoprotein biosynthetic process	1	11	0.03797	0.229683	MGP_C57BL6NJ_G0021963(Itm2b)
BP	GO:0014866	skeletal myofibril assembly	1	11	0.03797	0.229683	MGP_C57BL6NJ_G0024409(Myom1)
BP	GO:0021561	facial nerve development	1	11	0.03797	0.229683	MGP_C57BL6NJ_G0034792(Nrp1)
BP	GO:0021604	cranial nerve structural organization	1	11	0.03797	0.229683	MGP_C57BL6NJ_G0034792(Nrp1)
BP	GO:0021610	facial nerve morphogenesis	1	11	0.03797	0.229683	MGP_C57BL6NJ_G0034792(Nrp1)
BP	GO:0030240	skeletal muscle thin filament assembly	1	11	0.03797	0.229683	MGP_C57BL6NJ_G0024409(Myom1)
BP	GO:0031033	myosin filament organization	1	11	0.03797	0.229683	MGP_C57BL6NJ_G0024409(Myom1)
BP	GO:0035729	cellular response to hepatocyte growth factor stimulus	1	11	0.03797	0.229683	MGP_C57BL6NJ_G0034792(Nrp1)
BP	GO:0043455	regulation of secondary metabolic process	1	11	0.03797	0.229683	MGP_C57BL6NJ_G0026135(Zeb2)
BP	GO:0060452	positive regulation of cardiac muscle contraction	1	11	0.03797	0.229683	MGP_C57BL6NJ_G0021900(Adra1a)
BP	GO:0060600	dichotomous subdivision of an epithelial terminal unit	1	11	0.03797	0.229683	MGP_C57BL6NJ_G0034792(Nrp1)
BP	GO:0070341	fat cell proliferation	1	11	0.03797	0.229683	MGP_C57BL6NJ_G0016617(Pid1)
BP	GO:0070344	regulation of fat cell proliferation	1	11	0.03797	0.229683	MGP_C57BL6NJ_G0016617(Pid1)
BP	GO:0072540	T-helper 17 cell lineage commitment	1	11	0.03797	0.229683	MGP_C57BL6NJ_G0020351(Batf)
BP	GO:0072697	protein localization to cell cortex	1	11	0.03797	0.229683	MGP_C57BL6NJ_G0029285(Epb41)
BP	GO:0098880	maintenance of postsynaptic specialization structure	1	11	0.03797	0.229683	MGP_C57BL6NJ_G0020259(Gphn)
BP	GO:1902287	semaphorin-plexin signaling pathway involved in axon guidance	1	11	0.03797	0.229683	MGP_C57BL6NJ_G0034792(Nrp1)
BP	GO:0032092	positive regulation of protein binding	2	88	0.03829	0.230917	MGP_C57BL6NJ_G0024287(Plcl2),MGP_C57BL6NJ_G0029285(Epb41)
MF	GO:0005545	1-phosphatidylinositol binding	1	11	0.03862	0.230917	MGP_C57BL6NJ_G0029285(Epb41)
MF	GO:0017154	semaphorin receptor activity	1	11	0.03862	0.230917	MGP_C57BL6NJ_G0034792(Nrp1)
MF	GO:0043522	leucine zipper domain binding	1	11	0.03862	0.230917	MGP_C57BL6NJ_G0022517(Mkl1)
MF	GO:0045294	alpha-catenin binding	1	11	0.03862	0.230917	MGP_C57BL6NJ_G0019782(Armc7)
BP	GO:0009144	purine nucleoside triphosphate metabolic process	3	213	0.03892	0.231641	MGP_C57BL6NJ_G0016617(Pid1),MGP_C57BL6NJ_G0020259(Gphn),MGP_C57BL6NJ_G0026261(Atp5g3)
BP	GO:0009199	ribonucleoside triphosphate metabolic process	3	213	0.03892	0.231641	MGP_C57BL6NJ_G0016617(Pid1),MGP_C57BL6NJ_G0020259(Gphn),MGP_C57BL6NJ_G0026261(Atp5g3)
BP	GO:0048869	cellular developmental process	19	3629	0.03914	0.232416	MGP_C57BL6NJ_G0016429(Satb2),MGP_C57BL6NJ_G0016617(Pid1),MGP_C57BL6NJ_G0017366(Cd34),MGP_C57BL6NJ_G0020351(Batf),MGP_C57BL6NJ_G0020849(Rreb1),MGP_C57BL6NJ_G0021322(Il6st),MGP_C57BL6NJ_G0021900(Adra1a),MGP_C57BL6NJ_G0022290(Nsmce2),MGP_C57BL6NJ_G0022301(Asap1),MGP_C57BL6NJ_G0022517(Mkl1),MGP_C57BL6NJ_G0024287(Plcl2),MGP_C57BL6NJ_G0024409(Myom1),MGP_C57BL6NJ_G0024850(Csnk1g3),MGP_C57BL6NJ_G0026135(…
MF	GO:0140110	transcription regulator activity	9	1294	0.03935	0.233128	MGP_C57BL6NJ_G0016210(St18),MGP_C57BL6NJ_G0016429(Satb2),MGP_C57BL6NJ_G0020351(Batf),MGP_C57BL6NJ_G0020849(Rreb1),MGP_C57BL6NJ_G0022517(Mkl1),MGP_C57BL6NJ_G0026135(Zeb2),MGP_C57BL6NJ_G0033450(Prkcb),MGP_C57BL6NJ_G0035015(Fli1),MGP_C57BL6NJ_G0035508(Rfx7)
BP	GO:0051056	regulation of small GTPase mediated signal transduction	3	215	0.03984	0.235128	MGP_C57BL6NJ_G0021900(Adra1a),MGP_C57BL6NJ_G0026118(Dennd1a),MGP_C57BL6NJ_G0034792(Nrp1)
BP	GO:0003014	renal system process	2	90	0.03988	0.235128	MGP_C57BL6NJ_G0017366(Cd34),MGP_C57BL6NJ_G0021900(Adra1a)
BP	GO:0031324	negative regulation of cellular metabolic process	13	2203	0.03996	0.235128	MGP_C57BL6NJ_G0016210(St18),MGP_C57BL6NJ_G0016429(Satb2),MGP_C57BL6NJ_G0016617(Pid1),MGP_C57BL6NJ_G0016986(Fam129a),MGP_C57BL6NJ_G0017366(Cd34),MGP_C57BL6NJ_G0020849(Rreb1),MGP_C57BL6NJ_G0021878(Hmbox1),MGP_C57BL6NJ_G0021900(Adra1a),MGP_C57BL6NJ_G0021963(Itm2b),MGP_C57BL6NJ_G0022517(Mkl1),MGP_C57BL6NJ_G0026135(Zeb2),MGP_C57BL6NJ_G0028281(Ap1ar),MGP_C57BL6NJ_G0035602(Syncrip)
BP	GO:0010631	epithelial cell migration	3	216	0.0403	0.236056	MGP_C57BL6NJ_G0020849(Rreb1),MGP_C57BL6NJ_G0026135(Zeb2),MGP_C57BL6NJ_G0034792(Nrp1)
BP	GO:0050730	regulation of peptidyl-tyrosine phosphorylation	3	216	0.0403	0.236056	MGP_C57BL6NJ_G0021322(Il6st),MGP_C57BL6NJ_G0021900(Adra1a),MGP_C57BL6NJ_G0034792(Nrp1)
CC	GO:0000276	mitochondrial proton-transporting ATP synthase complex, coupling factor F(o)	1	12	0.0406	0.236742	MGP_C57BL6NJ_G0026261(Atp5g3)
CC	GO:0005859	muscle myosin complex	1	12	0.0406	0.236742	MGP_C57BL6NJ_G0024409(Myom1)
BP	GO:0090132	epithelium migration	3	218	0.04124	0.236848	MGP_C57BL6NJ_G0020849(Rreb1),MGP_C57BL6NJ_G0026135(Zeb2),MGP_C57BL6NJ_G0034792(Nrp1)
BP	GO:0030949	positive regulation of vascular endothelial growth factor receptor signaling pathway	1	12	0.04135	0.236848	MGP_C57BL6NJ_G0033450(Prkcb)
BP	GO:0035563	positive regulation of chromatin binding	1	12	0.04135	0.236848	MGP_C57BL6NJ_G0021878(Hmbox1)
BP	GO:0071380	cellular response to prostaglandin E stimulus	1	12	0.04135	0.236848	MGP_C57BL6NJ_G0021587(Ptger2)
BP	GO:1900025	negative regulation of substrate adhesion-dependent cell spreading	1	12	0.04135	0.236848	MGP_C57BL6NJ_G0028281(Ap1ar)
BP	GO:1902285	semaphorin-plexin signaling pathway involved in neuron projection guidance	1	12	0.04135	0.236848	MGP_C57BL6NJ_G0034792(Nrp1)
BP	GO:1903358	regulation of Golgi organization	1	12	0.04135	0.236848	MGP_C57BL6NJ_G0024426(Ehd3)
BP	GO:1903779	regulation of cardiac conduction	1	12	0.04135	0.236848	MGP_C57BL6NJ_G0024426(Ehd3)
BP	GO:0009108	coenzyme biosynthetic process	2	92	0.0415	0.237182	MGP_C57BL6NJ_G0020259(Gphn),MGP_C57BL6NJ_G0025810(Pdss1)
BP	GO:0023057	negative regulation of signaling	8	1123	0.04181	0.238428	MGP_C57BL6NJ_G0016617(Pid1),MGP_C57BL6NJ_G0021322(Il6st),MGP_C57BL6NJ_G0021900(Adra1a),MGP_C57BL6NJ_G0022517(Mkl1),MGP_C57BL6NJ_G0024287(Plcl2),MGP_C57BL6NJ_G0028281(Ap1ar),MGP_C57BL6NJ_G0033450(Prkcb),MGP_C57BL6NJ_G0034792(Nrp1)
MF	GO:0017110	nucleoside-diphosphatase activity	1	12	0.04206	0.238801	MGP_C57BL6NJ_G0021924(Gm21685)
MF	GO:0098918	structural constituent of synapse	1	12	0.04206	0.238801	MGP_C57BL6NJ_G0020259(Gphn)
BP	GO:0006366	transcription from RNA polymerase II promoter	11	1772	0.04278	0.240193	MGP_C57BL6NJ_G0016210(St18),MGP_C57BL6NJ_G0016429(Satb2),MGP_C57BL6NJ_G0016617(Pid1),MGP_C57BL6NJ_G0020351(Batf),MGP_C57BL6NJ_G0020849(Rreb1),MGP_C57BL6NJ_G0021878(Hmbox1),MGP_C57BL6NJ_G0022517(Mkl1),MGP_C57BL6NJ_G0026135(Zeb2),MGP_C57BL6NJ_G0033450(Prkcb),MGP_C57BL6NJ_G0035015(Fli1),MGP_C57BL6NJ_G0035508(Rfx7)
BP	GO:0009893	positive regulation of metabolic process	16	2932	0.04287	0.240193	MGP_C57BL6NJ_G0016210(St18),MGP_C57BL6NJ_G0016429(Satb2),MGP_C57BL6NJ_G0016617(Pid1),MGP_C57BL6NJ_G0016986(Fam129a),MGP_C57BL6NJ_G0020351(Batf),MGP_C57BL6NJ_G0020849(Rreb1),MGP_C57BL6NJ_G0021322(Il6st),MGP_C57BL6NJ_G0021878(Hmbox1),MGP_C57BL6NJ_G0021900(Adra1a),MGP_C57BL6NJ_G0022517(Mkl1),MGP_C57BL6NJ_G0024409(Myom1),MGP_C57BL6NJ_G0026135(Zeb2),MGP_C57BL6NJ_G0033450(Prkcb),MGP_C57BL6NJ_G0034792(N…
BP	GO:0051648	vesicle localization	3	223	0.04362	0.240193	MGP_C57BL6NJ_G0021900(Adra1a),MGP_C57BL6NJ_G0026118(Dennd1a),MGP_C57BL6NJ_G0028281(Ap1ar)
BP	GO:0048522	positive regulation of cellular process	22	4431	0.04378	0.240193	MGP_C57BL6NJ_G0016210(St18),MGP_C57BL6NJ_G0016429(Satb2),MGP_C57BL6NJ_G0016617(Pid1),MGP_C57BL6NJ_G0016986(Fam129a),MGP_C57BL6NJ_G0017366(Cd34),MGP_C57BL6NJ_G0018428(Tns3),MGP_C57BL6NJ_G0020351(Batf),MGP_C57BL6NJ_G0020849(Rreb1),MGP_C57BL6NJ_G0021322(Il6st),MGP_C57BL6NJ_G0021878(Hmbox1),MGP_C57BL6NJ_G0021900(Adra1a),MGP_C57BL6NJ_G0022290(Nsmce2),MGP_C57BL6NJ_G0022301(Asap1),MGP_C57BL6NJ_G0022517(…
CC	GO:0045263	proton-transporting ATP synthase complex, coupling factor F(o)	1	13	0.0439	0.240193	MGP_C57BL6NJ_G0026261(Atp5g3)
BP	GO:0008286	insulin receptor signaling pathway	2	95	0.04397	0.240193	MGP_C57BL6NJ_G0016617(Pid1),MGP_C57BL6NJ_G0033450(Prkcb)
BP	GO:0090130	tissue migration	3	224	0.0441	0.240193	MGP_C57BL6NJ_G0020849(Rreb1),MGP_C57BL6NJ_G0026135(Zeb2),MGP_C57BL6NJ_G0034792(Nrp1)
BP	GO:0030036	actin cytoskeleton organization	5	552	0.04415	0.240193	MGP_C57BL6NJ_G0022517(Mkl1),MGP_C57BL6NJ_G0024409(Myom1),MGP_C57BL6NJ_G0028281(Ap1ar),MGP_C57BL6NJ_G0029285(Epb41),MGP_C57BL6NJ_G0034792(Nrp1)
BP	GO:0006793	phosphorus metabolic process	15	2705	0.04432	0.240193	MGP_C57BL6NJ_G0016617(Pid1),MGP_C57BL6NJ_G0016986(Fam129a),MGP_C57BL6NJ_G0017454(Pde7b),MGP_C57BL6NJ_G0019711(Pitpnc1),MGP_C57BL6NJ_G0020259(Gphn),MGP_C57BL6NJ_G0021322(Il6st),MGP_C57BL6NJ_G0021900(Adra1a),MGP_C57BL6NJ_G0021906(Ppp2r2a),MGP_C57BL6NJ_G0024287(Plcl2),MGP_C57BL6NJ_G0024850(Csnk1g3),MGP_C57BL6NJ_G0026135(Zeb2),MGP_C57BL6NJ_G0026261(Atp5g3),MGP_C57BL6NJ_G0030171(Cdkl2),MGP_C57BL6NJ_G0…
BP	GO:0031327	negative regulation of cellular biosynthetic process	9	1347	0.04447	0.240193	MGP_C57BL6NJ_G0016210(St18),MGP_C57BL6NJ_G0016429(Satb2),MGP_C57BL6NJ_G0016617(Pid1),MGP_C57BL6NJ_G0017366(Cd34),MGP_C57BL6NJ_G0020849(Rreb1),MGP_C57BL6NJ_G0021878(Hmbox1),MGP_C57BL6NJ_G0021963(Itm2b),MGP_C57BL6NJ_G0026135(Zeb2),MGP_C57BL6NJ_G0035602(Syncrip)
BP	GO:0000722	telomere maintenance via recombination	1	13	0.04472	0.240193	MGP_C57BL6NJ_G0022290(Nsmce2)
BP	GO:0007350	blastoderm segmentation	1	13	0.04472	0.240193	MGP_C57BL6NJ_G0034792(Nrp1)
BP	GO:0009214	cyclic nucleotide catabolic process	1	13	0.04472	0.240193	MGP_C57BL6NJ_G0017454(Pde7b)
BP	GO:0021877	forebrain neuron fate commitment	1	13	0.04472	0.240193	MGP_C57BL6NJ_G0016429(Satb2)
BP	GO:0022038	corpus callosum development	1	13	0.04472	0.240193	MGP_C57BL6NJ_G0026135(Zeb2)
BP	GO:0032438	melanosome organization	1	13	0.04472	0.240193	MGP_C57BL6NJ_G0026135(Zeb2)
BP	GO:0032570	response to progesterone	1	13	0.04472	0.240193	MGP_C57BL6NJ_G0021587(Ptger2)
BP	GO:0035728	response to hepatocyte growth factor	1	13	0.04472	0.240193	MGP_C57BL6NJ_G0034792(Nrp1)
BP	GO:0045760	positive regulation of action potential	1	13	0.04472	0.240193	MGP_C57BL6NJ_G0021900(Adra1a)
BP	GO:0061000	negative regulation of dendritic spine development	1	13	0.04472	0.240193	MGP_C57BL6NJ_G0022301(Asap1)
BP	GO:0061548	ganglion development	1	13	0.04472	0.240193	MGP_C57BL6NJ_G0034792(Nrp1)
BP	GO:0071636	positive regulation of transforming growth factor beta production	1	13	0.04472	0.240193	MGP_C57BL6NJ_G0017366(Cd34)
BP	GO:0071803	positive regulation of podosome assembly	1	13	0.04472	0.240193	MGP_C57BL6NJ_G0022301(Asap1)
BP	GO:0090036	regulation of protein kinase C signaling	1	13	0.04472	0.240193	MGP_C57BL6NJ_G0021900(Adra1a)
BP	GO:2001267	regulation of cysteine-type endopeptidase activity involved in apoptotic signaling pathway	1	13	0.04472	0.240193	MGP_C57BL6NJ_G0016210(St18)
CC	GO:0044464	cell part	55	14443	0.0448	0.240193	MGP_C57BL6NJ_G0016210(St18),MGP_C57BL6NJ_G0016429(Satb2),MGP_C57BL6NJ_G0016617(Pid1),MGP_C57BL6NJ_G0016967(Trove2),MGP_C57BL6NJ_G0016986(Fam129a),MGP_C57BL6NJ_G0017366(Cd34),MGP_C57BL6NJ_G0018428(Tns3),MGP_C57BL6NJ_G0018462(Lgalsl),MGP_C57BL6NJ_G0019711(Pitpnc1),MGP_C57BL6NJ_G0019782(Armc7),MGP_C57BL6NJ_G0020259(Gphn),MGP_C57BL6NJ_G0020351(Batf),MGP_C57BL6NJ_G0020402(Efcab11),MGP_C57BL6NJ_G002084…
BP	GO:1904375	regulation of protein localization to cell periphery	2	96	0.04481	0.240193	MGP_C57BL6NJ_G0016617(Pid1),MGP_C57BL6NJ_G0029285(Epb41)
BP	GO:0016197	endosomal transport	3	226	0.04508	0.241141	MGP_C57BL6NJ_G0024426(Ehd3),MGP_C57BL6NJ_G0026118(Dennd1a),MGP_C57BL6NJ_G0028281(Ap1ar)
MF	GO:0004559	alpha-mannosidase activity	1	13	0.04549	0.241188	MGP_C57BL6NJ_G0028083(Man1a2)
MF	GO:0035173	histone kinase activity	1	13	0.04549	0.241188	MGP_C57BL6NJ_G0033450(Prkcb)
BP	GO:0043412	macromolecule modification	18	3445	0.04586	0.241188	MGP_C57BL6NJ_G0016429(Satb2),MGP_C57BL6NJ_G0016617(Pid1),MGP_C57BL6NJ_G0016986(Fam129a),MGP_C57BL6NJ_G0020259(Gphn),MGP_C57BL6NJ_G0021322(Il6st),MGP_C57BL6NJ_G0021900(Adra1a),MGP_C57BL6NJ_G0021906(Ppp2r2a),MGP_C57BL6NJ_G0022290(Nsmce2),MGP_C57BL6NJ_G0024287(Plcl2),MGP_C57BL6NJ_G0024850(Csnk1g3),MGP_C57BL6NJ_G0026135(Zeb2),MGP_C57BL6NJ_G0028083(Man1a2),MGP_C57BL6NJ_G0030171(Cdkl2),MGP_C57BL6NJ_G00…
BP	GO:0035282	segmentation	2	98	0.0465	0.241188	MGP_C57BL6NJ_G0026135(Zeb2),MGP_C57BL6NJ_G0034792(Nrp1)
BP	GO:0060048	cardiac muscle contraction	2	98	0.0465	0.241188	MGP_C57BL6NJ_G0021900(Adra1a),MGP_C57BL6NJ_G0024426(Ehd3)
MF	GO:0001227	transcriptional repressor activity, RNA polymerase II transcription regulatory region sequence-specific binding	3	226	0.04705	0.241188	MGP_C57BL6NJ_G0016210(St18),MGP_C57BL6NJ_G0016429(Satb2),MGP_C57BL6NJ_G0026135(Zeb2)
BP	GO:0009141	nucleoside triphosphate metabolic process	3	230	0.04707	0.241188	MGP_C57BL6NJ_G0016617(Pid1),MGP_C57BL6NJ_G0020259(Gphn),MGP_C57BL6NJ_G0026261(Atp5g3)
CC	GO:0032982	myosin filament	1	14	0.0472	0.241188	MGP_C57BL6NJ_G0024409(Myom1)
BP	GO:0000723	telomere maintenance	2	99	0.04735	0.241188	MGP_C57BL6NJ_G0021878(Hmbox1),MGP_C57BL6NJ_G0022290(Nsmce2)
BP	GO:0097435	supramolecular fiber organization	5	564	0.04766	0.241188	MGP_C57BL6NJ_G0020402(Efcab11),MGP_C57BL6NJ_G0024409(Myom1),MGP_C57BL6NJ_G0028281(Ap1ar),MGP_C57BL6NJ_G0031664(Mfap5),MGP_C57BL6NJ_G0034792(Nrp1)
BP	GO:0001976	neurological system process involved in regulation of systemic arterial blood pressure	1	14	0.04807	0.241188	MGP_C57BL6NJ_G0021900(Adra1a)
BP	GO:0006744	ubiquinone biosynthetic process	1	14	0.04807	0.241188	MGP_C57BL6NJ_G0025810(Pdss1)
BP	GO:0006895	Golgi to endosome transport	1	14	0.04807	0.241188	MGP_C57BL6NJ_G0028281(Ap1ar)
BP	GO:0007202	activation of phospholipase C activity	1	14	0.04807	0.241188	MGP_C57BL6NJ_G0021900(Adra1a)
BP	GO:0007512	adult heart development	1	14	0.04807	0.241188	MGP_C57BL6NJ_G0021900(Adra1a)
BP	GO:0032230	positive regulation of synaptic transmission, GABAergic	1	14	0.04807	0.241188	MGP_C57BL6NJ_G0021900(Adra1a)
BP	GO:0034315	regulation of Arp2/3 complex-mediated actin nucleation	1	14	0.04807	0.241188	MGP_C57BL6NJ_G0028281(Ap1ar)
BP	GO:0034389	lipid particle organization	1	14	0.04807	0.241188	MGP_C57BL6NJ_G0024539(Rab18)
BP	GO:0034695	response to prostaglandin E	1	14	0.04807	0.241188	MGP_C57BL6NJ_G0021587(Ptger2)
BP	GO:0035269	protein O-linked mannosylation	1	14	0.04807	0.241188	MGP_C57BL6NJ_G0034287(Large)
BP	GO:0044320	cellular response to leptin stimulus	1	14	0.04807	0.241188	MGP_C57BL6NJ_G0016617(Pid1)
BP	GO:0045019	negative regulation of nitric oxide biosynthetic process	1	14	0.04807	0.241188	MGP_C57BL6NJ_G0017366(Cd34)
BP	GO:0048739	cardiac muscle fiber development	1	14	0.04807	0.241188	MGP_C57BL6NJ_G0024409(Myom1)
BP	GO:0048753	pigment granule organization	1	14	0.04807	0.241188	MGP_C57BL6NJ_G0026135(Zeb2)
BP	GO:0060979	vasculogenesis involved in coronary vascular morphogenesis	1	14	0.04807	0.241188	MGP_C57BL6NJ_G0034792(Nrp1)
BP	GO:0071379	cellular response to prostaglandin stimulus	1	14	0.04807	0.241188	MGP_C57BL6NJ_G0021587(Ptger2)
BP	GO:0072578	neurotransmitter-gated ion channel clustering	1	14	0.04807	0.241188	MGP_C57BL6NJ_G0020259(Gphn)
BP	GO:0072673	lamellipodium morphogenesis	1	14	0.04807	0.241188	MGP_C57BL6NJ_G0020849(Rreb1)
BP	GO:1900037	regulation of cellular response to hypoxia	1	14	0.04807	0.241188	MGP_C57BL6NJ_G0017366(Cd34)
BP	GO:1901663	quinone biosynthetic process	1	14	0.04807	0.241188	MGP_C57BL6NJ_G0025810(Pdss1)
BP	GO:1903019	negative regulation of glycoprotein metabolic process	1	14	0.04807	0.241188	MGP_C57BL6NJ_G0021963(Itm2b)
BP	GO:1904406	negative regulation of nitric oxide metabolic process	1	14	0.04807	0.241188	MGP_C57BL6NJ_G0017366(Cd34)
BP	GO:0032200	telomere organization	2	100	0.04821	0.241407	MGP_C57BL6NJ_G0021878(Hmbox1),MGP_C57BL6NJ_G0022290(Nsmce2)
CC	GO:0005623	cell	55	14475	0.0483	0.241407	MGP_C57BL6NJ_G0016210(St18),MGP_C57BL6NJ_G0016429(Satb2),MGP_C57BL6NJ_G0016617(Pid1),MGP_C57BL6NJ_G0016967(Trove2),MGP_C57BL6NJ_G0016986(Fam129a),MGP_C57BL6NJ_G0017366(Cd34),MGP_C57BL6NJ_G0018428(Tns3),MGP_C57BL6NJ_G0018462(Lgalsl),MGP_C57BL6NJ_G0019711(Pitpnc1),MGP_C57BL6NJ_G0019782(Armc7),MGP_C57BL6NJ_G0020259(Gphn),MGP_C57BL6NJ_G0020351(Batf),MGP_C57BL6NJ_G0020402(Efcab11),MGP_C57BL6NJ_G002084…
BP	GO:0030003	cellular cation homeostasis	5	568	0.04887	0.241525	MGP_C57BL6NJ_G0021322(Il6st),MGP_C57BL6NJ_G0021587(Ptger2),MGP_C57BL6NJ_G0021900(Adra1a),MGP_C57BL6NJ_G0033450(Prkcb),MGP_C57BL6NJ_G0036487(Abcb7)
MF	GO:0004953	icosanoid receptor activity	1	14	0.0489	0.241525	MGP_C57BL6NJ_G0021587(Ptger2)
MF	GO:0015923	mannosidase activity	1	14	0.0489	0.241525	MGP_C57BL6NJ_G0028083(Man1a2)
MF	GO:0030275	LRR domain binding	1	14	0.0489	0.241525	MGP_C57BL6NJ_G0022517(Mkl1)
MF	GO:0050811	GABA receptor binding	1	14	0.0489	0.241525	MGP_C57BL6NJ_G0024287(Plcl2)
BP	GO:1901135	carbohydrate derivative metabolic process	7	954	0.04891	0.241525	MGP_C57BL6NJ_G0016617(Pid1),MGP_C57BL6NJ_G0017454(Pde7b),MGP_C57BL6NJ_G0020259(Gphn),MGP_C57BL6NJ_G0021963(Itm2b),MGP_C57BL6NJ_G0026261(Atp5g3),MGP_C57BL6NJ_G0028083(Man1a2),MGP_C57BL6NJ_G0034287(Large)
BP	GO:0009890	negative regulation of biosynthetic process	9	1372	0.04902	0.241525	MGP_C57BL6NJ_G0016210(St18),MGP_C57BL6NJ_G0016429(Satb2),MGP_C57BL6NJ_G0016617(Pid1),MGP_C57BL6NJ_G0017366(Cd34),MGP_C57BL6NJ_G0020849(Rreb1),MGP_C57BL6NJ_G0021878(Hmbox1),MGP_C57BL6NJ_G0021963(Itm2b),MGP_C57BL6NJ_G0026135(Zeb2),MGP_C57BL6NJ_G0035602(Syncrip)
BP	GO:0007189	adenylate cyclase-activating G-protein coupled receptor signaling pathway	2	101	0.04907	0.241525	MGP_C57BL6NJ_G0021587(Ptger2),MGP_C57BL6NJ_G0021900(Adra1a)
BP	GO:0016477	cell migration	8	1162	0.04944	0.242572	MGP_C57BL6NJ_G0016429(Satb2),MGP_C57BL6NJ_G0017366(Cd34),MGP_C57BL6NJ_G0018428(Tns3),MGP_C57BL6NJ_G0020849(Rreb1),MGP_C57BL6NJ_G0021322(Il6st),MGP_C57BL6NJ_G0022517(Mkl1),MGP_C57BL6NJ_G0026135(Zeb2),MGP_C57BL6NJ_G0034792(Nrp1)
BP	GO:0060322	head development	5	570	0.04947	0.242572	MGP_C57BL6NJ_G0016429(Satb2),MGP_C57BL6NJ_G0022517(Mkl1),MGP_C57BL6NJ_G0024539(Rab18),MGP_C57BL6NJ_G0026135(Zeb2),MGP_C57BL6NJ_G0034792(Nrp1)
MF	GO:0017124	SH3 domain binding	2	101	0.05062	0.243801	MGP_C57BL6NJ_G0022301(Asap1),MGP_C57BL6NJ_G0026118(Dennd1a)
BP	GO:0010811	positive regulation of cell-substrate adhesion	2	103	0.05082	0.243801	MGP_C57BL6NJ_G0020849(Rreb1),MGP_C57BL6NJ_G0034792(Nrp1)
BP	GO:0006464	cellular protein modification process	17	3240	0.05083	0.243801	MGP_C57BL6NJ_G0016617(Pid1),MGP_C57BL6NJ_G0016986(Fam129a),MGP_C57BL6NJ_G0020259(Gphn),MGP_C57BL6NJ_G0021322(Il6st),MGP_C57BL6NJ_G0021900(Adra1a),MGP_C57BL6NJ_G0021906(Ppp2r2a),MGP_C57BL6NJ_G0022290(Nsmce2),MGP_C57BL6NJ_G0024287(Plcl2),MGP_C57BL6NJ_G0024850(Csnk1g3),MGP_C57BL6NJ_G0026135(Zeb2),MGP_C57BL6NJ_G0028083(Man1a2),MGP_C57BL6NJ_G0030171(Cdkl2),MGP_C57BL6NJ_G0031590(Mkrn2),MGP_C57BL6NJ_G00…
BP	GO:0036211	protein modification process	17	3240	0.05083	0.243801	MGP_C57BL6NJ_G0016617(Pid1),MGP_C57BL6NJ_G0016986(Fam129a),MGP_C57BL6NJ_G0020259(Gphn),MGP_C57BL6NJ_G0021322(Il6st),MGP_C57BL6NJ_G0021900(Adra1a),MGP_C57BL6NJ_G0021906(Ppp2r2a),MGP_C57BL6NJ_G0022290(Nsmce2),MGP_C57BL6NJ_G0024287(Plcl2),MGP_C57BL6NJ_G0024850(Csnk1g3),MGP_C57BL6NJ_G0026135(Zeb2),MGP_C57BL6NJ_G0028083(Man1a2),MGP_C57BL6NJ_G0030171(Cdkl2),MGP_C57BL6NJ_G0031590(Mkrn2),MGP_C57BL6NJ_G00…
BP	GO:0002076	osteoblast development	1	15	0.05142	0.243801	MGP_C57BL6NJ_G0016429(Satb2)
BP	GO:0002295	T-helper cell lineage commitment	1	15	0.05142	0.243801	MGP_C57BL6NJ_G0020351(Batf)
BP	GO:0006491	N-glycan processing	1	15	0.05142	0.243801	MGP_C57BL6NJ_G0028083(Man1a2)
BP	GO:0006743	ubiquinone metabolic process	1	15	0.05142	0.243801	MGP_C57BL6NJ_G0025810(Pdss1)
BP	GO:0021783	preganglionic parasympathetic fiber development	1	15	0.05142	0.243801	MGP_C57BL6NJ_G0034792(Nrp1)
BP	GO:0035313	wound healing, spreading of epidermal cells	1	15	0.05142	0.243801	MGP_C57BL6NJ_G0020849(Rreb1)
BP	GO:0043011	myeloid dendritic cell differentiation	1	15	0.05142	0.243801	MGP_C57BL6NJ_G0020351(Batf)
BP	GO:0045989	positive regulation of striated muscle contraction	1	15	0.05142	0.243801	MGP_C57BL6NJ_G0021900(Adra1a)
BP	GO:0048070	regulation of developmental pigmentation	1	15	0.05142	0.243801	MGP_C57BL6NJ_G0026135(Zeb2)
BP	GO:0048711	positive regulation of astrocyte differentiation	1	15	0.05142	0.243801	MGP_C57BL6NJ_G0021322(Il6st)
BP	GO:0061298	retina vasculature development in camera-type eye	1	15	0.05142	0.243801	MGP_C57BL6NJ_G0034792(Nrp1)
BP	GO:0071696	ectodermal placode development	1	15	0.05142	0.243801	MGP_C57BL6NJ_G0034792(Nrp1)
BP	GO:0071786	endoplasmic reticulum tubular network organization	1	15	0.05142	0.243801	MGP_C57BL6NJ_G0024539(Rab18)
BP	GO:0099558	maintenance of synapse structure	1	15	0.05142	0.243801	MGP_C57BL6NJ_G0020259(Gphn)
MF	GO:0042626	ATPase activity, coupled to transmembrane movement of substances	2	102	0.05151	0.243801	MGP_C57BL6NJ_G0026261(Atp5g3),MGP_C57BL6NJ_G0036487(Abcb7)
BP	GO:0006468	protein phosphorylation	10	1605	0.05176	0.244413	MGP_C57BL6NJ_G0016617(Pid1),MGP_C57BL6NJ_G0016986(Fam129a),MGP_C57BL6NJ_G0021322(Il6st),MGP_C57BL6NJ_G0021900(Adra1a),MGP_C57BL6NJ_G0024287(Plcl2),MGP_C57BL6NJ_G0024850(Csnk1g3),MGP_C57BL6NJ_G0026135(Zeb2),MGP_C57BL6NJ_G0030171(Cdkl2),MGP_C57BL6NJ_G0033450(Prkcb),MGP_C57BL6NJ_G0034792(Nrp1)
BP	GO:0045765	regulation of angiogenesis	3	240	0.05222	0.244413	MGP_C57BL6NJ_G0017366(Cd34),MGP_C57BL6NJ_G0033450(Prkcb),MGP_C57BL6NJ_G0034792(Nrp1)
MF	GO:0004435	phosphatidylinositol phospholipase C activity	1	15	0.0523	0.244413	MGP_C57BL6NJ_G0024287(Plcl2)
MF	GO:0004697	protein kinase C activity	1	15	0.0523	0.244413	MGP_C57BL6NJ_G0033450(Prkcb)
MF	GO:0046933	proton-transporting ATP synthase activity, rotational mechanism	1	15	0.0523	0.244413	MGP_C57BL6NJ_G0026261(Atp5g3)
MF	GO:0051371	muscle alpha-actinin binding	1	15	0.0523	0.244413	MGP_C57BL6NJ_G0024409(Myom1)
MF	GO:0070679	inositol 1,4,5 trisphosphate binding	1	15	0.0523	0.244413	MGP_C57BL6NJ_G0024287(Plcl2)
BP	GO:0051234	establishment of localization	20	4002	0.05254	0.245092	MGP_C57BL6NJ_G0016617(Pid1),MGP_C57BL6NJ_G0017366(Cd34),MGP_C57BL6NJ_G0019711(Pitpnc1),MGP_C57BL6NJ_G0020259(Gphn),MGP_C57BL6NJ_G0021900(Adra1a),MGP_C57BL6NJ_G0024409(Myom1),MGP_C57BL6NJ_G0024426(Ehd3),MGP_C57BL6NJ_G0024539(Rab18),MGP_C57BL6NJ_G0024850(Csnk1g3),MGP_C57BL6NJ_G0026118(Dennd1a),MGP_C57BL6NJ_G0026178(Cd302),MGP_C57BL6NJ_G0026261(Atp5g3),MGP_C57BL6NJ_G0028281(Ap1ar),MGP_C57BL6NJ_G0028…
BP	GO:0006873	cellular ion homeostasis	5	581	0.05291	0.246374	MGP_C57BL6NJ_G0021322(Il6st),MGP_C57BL6NJ_G0021587(Ptger2),MGP_C57BL6NJ_G0021900(Adra1a),MGP_C57BL6NJ_G0033450(Prkcb),MGP_C57BL6NJ_G0036487(Abcb7)
MF	GO:0016820	hydrolase activity, acting on acid anhydrides, catalyzing transmembrane movement of substances	2	104	0.05332	0.247718	MGP_C57BL6NJ_G0026261(Atp5g3),MGP_C57BL6NJ_G0036487(Abcb7)
BP	GO:0009150	purine ribonucleotide metabolic process	4	404	0.05339	0.247718	MGP_C57BL6NJ_G0016617(Pid1),MGP_C57BL6NJ_G0017454(Pde7b),MGP_C57BL6NJ_G0020259(Gphn),MGP_C57BL6NJ_G0026261(Atp5g3)
BP	GO:0055065	metal ion homeostasis	5	583	0.05355	0.247811	MGP_C57BL6NJ_G0021322(Il6st),MGP_C57BL6NJ_G0021587(Ptger2),MGP_C57BL6NJ_G0021900(Adra1a),MGP_C57BL6NJ_G0033450(Prkcb),MGP_C57BL6NJ_G0036487(Abcb7)
BP	GO:1901137	carbohydrate derivative biosynthetic process	5	584	0.05387	0.247811	MGP_C57BL6NJ_G0016617(Pid1),MGP_C57BL6NJ_G0021963(Itm2b),MGP_C57BL6NJ_G0026261(Atp5g3),MGP_C57BL6NJ_G0028083(Man1a2),MGP_C57BL6NJ_G0034287(Large)
BP	GO:0051345	positive regulation of hydrolase activity	5	586	0.05451	0.247811	MGP_C57BL6NJ_G0016210(St18),MGP_C57BL6NJ_G0021900(Adra1a),MGP_C57BL6NJ_G0022301(Asap1),MGP_C57BL6NJ_G0026118(Dennd1a),MGP_C57BL6NJ_G0034792(Nrp1)
BP	GO:0007063	regulation of sister chromatid cohesion	1	16	0.05475	0.247811	MGP_C57BL6NJ_G0022290(Nsmce2)
BP	GO:0021854	hypothalamus development	1	16	0.05475	0.247811	MGP_C57BL6NJ_G0034792(Nrp1)
BP	GO:0034694	response to prostaglandin	1	16	0.05475	0.247811	MGP_C57BL6NJ_G0021587(Ptger2)
BP	GO:0042438	melanin biosynthetic process	1	16	0.05475	0.247811	MGP_C57BL6NJ_G0026135(Zeb2)
BP	GO:0043278	response to morphine	1	16	0.05475	0.247811	MGP_C57BL6NJ_G0021906(Ppp2r2a)
BP	GO:0043373	CD4-positive, alpha-beta T cell lineage commitment	1	16	0.05475	0.247811	MGP_C57BL6NJ_G0020351(Batf)
BP	GO:0044321	response to leptin	1	16	0.05475	0.247811	MGP_C57BL6NJ_G0016617(Pid1)
BP	GO:0060973	cell migration involved in heart development	1	16	0.05475	0.247811	MGP_C57BL6NJ_G0034792(Nrp1)
BP	GO:0099633	protein localization to postsynaptic specialization membrane	1	16	0.05475	0.247811	MGP_C57BL6NJ_G0020259(Gphn)
BP	GO:0099645	neurotransmitter receptor localization to postsynaptic specialization membrane	1	16	0.05475	0.247811	MGP_C57BL6NJ_G0020259(Gphn)
BP	GO:2000104	negative regulation of DNA-dependent DNA replication	1	16	0.05475	0.247811	MGP_C57BL6NJ_G0016617(Pid1)
MF	GO:0000982	transcription factor activity, RNA polymerase II core promoter proximal region sequence-specific binding	4	401	0.05499	0.248463	MGP_C57BL6NJ_G0016210(St18),MGP_C57BL6NJ_G0016429(Satb2),MGP_C57BL6NJ_G0020351(Batf),MGP_C57BL6NJ_G0035015(Fli1)
BP	GO:0006936	muscle contraction	3	246	0.05544	0.249895	MGP_C57BL6NJ_G0021900(Adra1a),MGP_C57BL6NJ_G0024409(Myom1),MGP_C57BL6NJ_G0024426(Ehd3)
BP	GO:0051716	cellular response to stimulus	30	6667	0.0555	0.249895	MGP_C57BL6NJ_G0016210(St18),MGP_C57BL6NJ_G0016429(Satb2),MGP_C57BL6NJ_G0016617(Pid1),MGP_C57BL6NJ_G0016967(Trove2),MGP_C57BL6NJ_G0016986(Fam129a),MGP_C57BL6NJ_G0017366(Cd34),MGP_C57BL6NJ_G0017454(Pde7b),MGP_C57BL6NJ_G0019711(Pitpnc1),MGP_C57BL6NJ_G0020351(Batf),MGP_C57BL6NJ_G0020402(Efcab11),MGP_C57BL6NJ_G0020849(Rreb1),MGP_C57BL6NJ_G0021322(Il6st),MGP_C57BL6NJ_G0021587(Ptger2),MGP_C57BL6NJ_G0021…
MF	GO:0004629	phospholipase C activity	1	16	0.05569	0.250198	MGP_C57BL6NJ_G0024287(Plcl2)
MF	GO:0003677	DNA binding	11	1820	0.05584	0.250198	MGP_C57BL6NJ_G0016210(St18),MGP_C57BL6NJ_G0016429(Satb2),MGP_C57BL6NJ_G0020351(Batf),MGP_C57BL6NJ_G0020849(Rreb1),MGP_C57BL6NJ_G0021878(Hmbox1),MGP_C57BL6NJ_G0022517(Mkl1),MGP_C57BL6NJ_G0026135(Zeb2),MGP_C57BL6NJ_G0027001(Banf2),MGP_C57BL6NJ_G0035015(Fli1),MGP_C57BL6NJ_G0035508(Rfx7),MGP_C57BL6NJ_G0036143(Rhox1)
MF	GO:0042277	peptide binding	3	244	0.05669	0.250198	MGP_C57BL6NJ_G0021963(Itm2b),MGP_C57BL6NJ_G0022301(Asap1),MGP_C57BL6NJ_G0024850(Csnk1g3)
BP	GO:0045935	positive regulation of nucleobase-containing compound metabolic process	10	1632	0.05681	0.250198	MGP_C57BL6NJ_G0016210(St18),MGP_C57BL6NJ_G0016429(Satb2),MGP_C57BL6NJ_G0016617(Pid1),MGP_C57BL6NJ_G0020351(Batf),MGP_C57BL6NJ_G0020849(Rreb1),MGP_C57BL6NJ_G0021878(Hmbox1),MGP_C57BL6NJ_G0022517(Mkl1),MGP_C57BL6NJ_G0026135(Zeb2),MGP_C57BL6NJ_G0033450(Prkcb),MGP_C57BL6NJ_G0035015(Fli1)
CC	GO:0000159	protein phosphatase type 2A complex	1	17	0.0571	0.250198	MGP_C57BL6NJ_G0021906(Ppp2r2a)
CC	GO:0005697	telomerase holoenzyme complex	1	17	0.0571	0.250198	MGP_C57BL6NJ_G0021878(Hmbox1)
BP	GO:0010634	positive regulation of epithelial cell migration	2	110	0.05711	0.250198	MGP_C57BL6NJ_G0020849(Rreb1),MGP_C57BL6NJ_G0034792(Nrp1)
BP	GO:0030177	positive regulation of Wnt signaling pathway	2	110	0.05711	0.250198	MGP_C57BL6NJ_G0024850(Csnk1g3),MGP_C57BL6NJ_G0026135(Zeb2)
BP	GO:0006874	cellular calcium ion homeostasis	4	415	0.05783	0.250198	MGP_C57BL6NJ_G0021322(Il6st),MGP_C57BL6NJ_G0021587(Ptger2),MGP_C57BL6NJ_G0021900(Adra1a),MGP_C57BL6NJ_G0033450(Prkcb)
BP	GO:0009259	ribonucleotide metabolic process	4	415	0.05783	0.250198	MGP_C57BL6NJ_G0016617(Pid1),MGP_C57BL6NJ_G0017454(Pde7b),MGP_C57BL6NJ_G0020259(Gphn),MGP_C57BL6NJ_G0026261(Atp5g3)
BP	GO:0007413	axonal fasciculation	1	17	0.05808	0.250198	MGP_C57BL6NJ_G0034792(Nrp1)
BP	GO:0014072	response to isoquinoline alkaloid	1	17	0.05808	0.250198	MGP_C57BL6NJ_G0021906(Ppp2r2a)
BP	GO:0015985	energy coupled proton transport, down electrochemical gradient	1	17	0.05808	0.250198	MGP_C57BL6NJ_G0026261(Atp5g3)
BP	GO:0015986	ATP synthesis coupled proton transport	1	17	0.05808	0.250198	MGP_C57BL6NJ_G0026261(Atp5g3)
BP	GO:0032042	mitochondrial DNA metabolic process	1	17	0.05808	0.250198	MGP_C57BL6NJ_G0016617(Pid1)
BP	GO:0033599	regulation of mammary gland epithelial cell proliferation	1	17	0.05808	0.250198	MGP_C57BL6NJ_G0020849(Rreb1)
BP	GO:0035024	negative regulation of Rho protein signal transduction	1	17	0.05808	0.250198	MGP_C57BL6NJ_G0021900(Adra1a)
BP	GO:0036010	protein localization to endosome	1	17	0.05808	0.250198	MGP_C57BL6NJ_G0034792(Nrp1)
BP	GO:0045064	T-helper 2 cell differentiation	1	17	0.05808	0.250198	MGP_C57BL6NJ_G0020351(Batf)
BP	GO:0046325	negative regulation of glucose import	1	17	0.05808	0.250198	MGP_C57BL6NJ_G0016617(Pid1)
BP	GO:0048532	anatomical structure arrangement	1	17	0.05808	0.250198	MGP_C57BL6NJ_G0034792(Nrp1)
BP	GO:0071801	regulation of podosome assembly	1	17	0.05808	0.250198	MGP_C57BL6NJ_G0022301(Asap1)
BP	GO:0090050	positive regulation of cell migration involved in sprouting angiogenesis	1	17	0.05808	0.250198	MGP_C57BL6NJ_G0034792(Nrp1)
BP	GO:0097320	plasma membrane tubulation	1	17	0.05808	0.250198	MGP_C57BL6NJ_G0022301(Asap1)
BP	GO:0097734	extracellular exosome biogenesis	1	17	0.05808	0.250198	MGP_C57BL6NJ_G0017366(Cd34)
BP	GO:0106030	neuron projection fasciculation	1	17	0.05808	0.250198	MGP_C57BL6NJ_G0034792(Nrp1)
BP	GO:0006163	purine nucleotide metabolic process	4	416	0.05824	0.250471	MGP_C57BL6NJ_G0016617(Pid1),MGP_C57BL6NJ_G0017454(Pde7b),MGP_C57BL6NJ_G0020259(Gphn),MGP_C57BL6NJ_G0026261(Atp5g3)
BP	GO:0061041	regulation of wound healing	2	112	0.05896	0.253147	MGP_C57BL6NJ_G0017366(Cd34),MGP_C57BL6NJ_G0020849(Rreb1)
MF	GO:0015269	calcium-activated potassium channel activity	1	17	0.05907	0.253199	MGP_C57BL6NJ_G0034283(Tmem38a)
BP	GO:0019725	cellular homeostasis	6	795	0.05958	0.253491	MGP_C57BL6NJ_G0021322(Il6st),MGP_C57BL6NJ_G0021587(Ptger2),MGP_C57BL6NJ_G0021900(Adra1a),MGP_C57BL6NJ_G0033450(Prkcb),MGP_C57BL6NJ_G0034287(Large),MGP_C57BL6NJ_G0036487(Abcb7)
MF	GO:0015399	primary active transmembrane transporter activity	2	111	0.05983	0.253491	MGP_C57BL6NJ_G0026261(Atp5g3),MGP_C57BL6NJ_G0036487(Abcb7)
MF	GO:0015405	P-P-bond-hydrolysis-driven transmembrane transporter activity	2	111	0.05983	0.253491	MGP_C57BL6NJ_G0026261(Atp5g3),MGP_C57BL6NJ_G0036487(Abcb7)
MF	GO:0016779	nucleotidyltransferase activity	2	111	0.05983	0.253491	MGP_C57BL6NJ_G0020259(Gphn),MGP_C57BL6NJ_G0021878(Hmbox1)
BP	GO:0035023	regulation of Rho protein signal transduction	2	113	0.05989	0.253491	MGP_C57BL6NJ_G0021900(Adra1a),MGP_C57BL6NJ_G0034792(Nrp1)
BP	GO:0055007	cardiac muscle cell differentiation	2	113	0.05989	0.253491	MGP_C57BL6NJ_G0021900(Adra1a),MGP_C57BL6NJ_G0024409(Myom1)
CC	GO:0033177	proton-transporting two-sector ATPase complex, proton-transporting domain	1	18	0.0603	0.253491	MGP_C57BL6NJ_G0026261(Atp5g3)
BP	GO:0018105	peptidyl-serine phosphorylation	3	256	0.06102	0.253491	MGP_C57BL6NJ_G0024287(Plcl2),MGP_C57BL6NJ_G0024850(Csnk1g3),MGP_C57BL6NJ_G0033450(Prkcb)
BP	GO:0051246	regulation of protein metabolic process	13	2347	0.06129	0.253491	MGP_C57BL6NJ_G0016210(St18),MGP_C57BL6NJ_G0016617(Pid1),MGP_C57BL6NJ_G0016986(Fam129a),MGP_C57BL6NJ_G0021322(Il6st),MGP_C57BL6NJ_G0021900(Adra1a),MGP_C57BL6NJ_G0021906(Ppp2r2a),MGP_C57BL6NJ_G0021963(Itm2b),MGP_C57BL6NJ_G0022517(Mkl1),MGP_C57BL6NJ_G0024287(Plcl2),MGP_C57BL6NJ_G0026135(Zeb2),MGP_C57BL6NJ_G0032858(Klhl25),MGP_C57BL6NJ_G0034792(Nrp1),MGP_C57BL6NJ_G0035602(Syncrip)
BP	GO:0002320	lymphoid progenitor cell differentiation	1	18	0.06139	0.253491	MGP_C57BL6NJ_G0020351(Batf)
BP	GO:0002363	alpha-beta T cell lineage commitment	1	18	0.06139	0.253491	MGP_C57BL6NJ_G0020351(Batf)
BP	GO:0003094	glomerular filtration	1	18	0.06139	0.253491	MGP_C57BL6NJ_G0017366(Cd34)
BP	GO:0006582	melanin metabolic process	1	18	0.06139	0.253491	MGP_C57BL6NJ_G0026135(Zeb2)
BP	GO:0035855	megakaryocyte development	1	18	0.06139	0.253491	MGP_C57BL6NJ_G0035015(Fli1)
BP	GO:0046716	muscle cell cellular homeostasis	1	18	0.06139	0.253491	MGP_C57BL6NJ_G0034287(Large)
BP	GO:0048486	parasympathetic nervous system development	1	18	0.06139	0.253491	MGP_C57BL6NJ_G0034792(Nrp1)
BP	GO:0050857	positive regulation of antigen receptor-mediated signaling pathway	1	18	0.06139	0.253491	MGP_C57BL6NJ_G0033450(Prkcb)
BP	GO:0051894	positive regulation of focal adhesion assembly	1	18	0.06139	0.253491	MGP_C57BL6NJ_G0034792(Nrp1)
BP	GO:0060218	hematopoietic stem cell differentiation	1	18	0.06139	0.253491	MGP_C57BL6NJ_G0020351(Batf)
BP	GO:0070498	interleukin-1-mediated signaling pathway	1	18	0.06139	0.253491	MGP_C57BL6NJ_G0016210(St18)
BP	GO:0071880	adenylate cyclase-activating adrenergic receptor signaling pathway	1	18	0.06139	0.253491	MGP_C57BL6NJ_G0021900(Adra1a)
BP	GO:1903077	negative regulation of protein localization to plasma membrane	1	18	0.06139	0.253491	MGP_C57BL6NJ_G0016617(Pid1)
BP	GO:2000251	positive regulation of actin cytoskeleton reorganization	1	18	0.06139	0.253491	MGP_C57BL6NJ_G0034792(Nrp1)
MF	GO:0043492	ATPase activity, coupled to movement of substances	2	113	0.06174	0.254208	MGP_C57BL6NJ_G0026261(Atp5g3),MGP_C57BL6NJ_G0036487(Abcb7)
BP	GO:0018107	peptidyl-threonine phosphorylation	2	115	0.06176	0.254208	MGP_C57BL6NJ_G0024850(Csnk1g3),MGP_C57BL6NJ_G0033450(Prkcb)
MF	GO:0004935	adrenergic receptor activity	1	18	0.06243	0.255698	MGP_C57BL6NJ_G0021900(Adra1a)
MF	GO:0019789	SUMO transferase activity	1	18	0.06243	0.255698	MGP_C57BL6NJ_G0022290(Nsmce2)
CC	GO:0030018	Z disc	2	118	0.0626	0.255698	MGP_C57BL6NJ_G0021900(Adra1a),MGP_C57BL6NJ_G0024409(Myom1)
BP	GO:0009968	negative regulation of signal transduction	7	1010	0.06276	0.255698	MGP_C57BL6NJ_G0016617(Pid1),MGP_C57BL6NJ_G0021322(Il6st),MGP_C57BL6NJ_G0021900(Adra1a),MGP_C57BL6NJ_G0022517(Mkl1),MGP_C57BL6NJ_G0024287(Plcl2),MGP_C57BL6NJ_G0033450(Prkcb),MGP_C57BL6NJ_G0034792(Nrp1)
BP	GO:1901566	organonitrogen compound biosynthetic process	9	1441	0.06319	0.255698	MGP_C57BL6NJ_G0016617(Pid1),MGP_C57BL6NJ_G0016986(Fam129a),MGP_C57BL6NJ_G0020259(Gphn),MGP_C57BL6NJ_G0021963(Itm2b),MGP_C57BL6NJ_G0026261(Atp5g3),MGP_C57BL6NJ_G0028083(Man1a2),MGP_C57BL6NJ_G0032858(Klhl25),MGP_C57BL6NJ_G0034287(Large),MGP_C57BL6NJ_G0035602(Syncrip)
BP	GO:0016049	cell growth	4	428	0.06332	0.255698	MGP_C57BL6NJ_G0021900(Adra1a),MGP_C57BL6NJ_G0026135(Zeb2),MGP_C57BL6NJ_G0029285(Epb41),MGP_C57BL6NJ_G0034792(Nrp1)
MF	GO:0030246	carbohydrate binding	3	256	0.0636	0.255698	MGP_C57BL6NJ_G0017366(Cd34),MGP_C57BL6NJ_G0018462(Lgalsl),MGP_C57BL6NJ_G0026178(Cd302)
CC	GO:0005753	mitochondrial proton-transporting ATP synthase complex	1	19	0.0636	0.255698	MGP_C57BL6NJ_G0026261(Atp5g3)
CC	GO:0046930	pore complex	1	19	0.0636	0.255698	MGP_C57BL6NJ_G0017366(Cd34)
BP	GO:0015758	glucose transport	2	117	0.06366	0.255698	MGP_C57BL6NJ_G0016617(Pid1),MGP_C57BL6NJ_G0033450(Prkcb)
BP	GO:0019693	ribose phosphate metabolic process	4	429	0.06376	0.255698	MGP_C57BL6NJ_G0016617(Pid1),MGP_C57BL6NJ_G0017454(Pde7b),MGP_C57BL6NJ_G0020259(Gphn),MGP_C57BL6NJ_G0026261(Atp5g3)
BP	GO:0055074	calcium ion homeostasis	4	429	0.06376	0.255698	MGP_C57BL6NJ_G0021322(Il6st),MGP_C57BL6NJ_G0021587(Ptger2),MGP_C57BL6NJ_G0021900(Adra1a),MGP_C57BL6NJ_G0033450(Prkcb)
BP	GO:0016482	cytosolic transport	2	118	0.06461	0.255698	MGP_C57BL6NJ_G0024426(Ehd3),MGP_C57BL6NJ_G0028281(Ap1ar)
BP	GO:0120031	plasma membrane bounded cell projection assembly	4	431	0.06463	0.255698	MGP_C57BL6NJ_G0016967(Trove2),MGP_C57BL6NJ_G0022301(Asap1),MGP_C57BL6NJ_G0024426(Ehd3),MGP_C57BL6NJ_G0034792(Nrp1)
BP	GO:0003084	positive regulation of systemic arterial blood pressure	1	19	0.06469	0.255698	MGP_C57BL6NJ_G0021900(Adra1a)
BP	GO:0007064	mitotic sister chromatid cohesion	1	19	0.06469	0.255698	MGP_C57BL6NJ_G0022290(Nsmce2)
BP	GO:0010863	positive regulation of phospholipase C activity	1	19	0.06469	0.255698	MGP_C57BL6NJ_G0021900(Adra1a)
BP	GO:0031290	retinal ganglion cell axon guidance	1	19	0.06469	0.255698	MGP_C57BL6NJ_G0034792(Nrp1)
BP	GO:0035268	protein mannosylation	1	19	0.06469	0.255698	MGP_C57BL6NJ_G0034287(Large)
BP	GO:0044550	secondary metabolite biosynthetic process	1	19	0.06469	0.255698	MGP_C57BL6NJ_G0026135(Zeb2)
BP	GO:0048199	vesicle targeting, to, from or within Golgi	1	19	0.06469	0.255698	MGP_C57BL6NJ_G0028281(Ap1ar)
BP	GO:0050858	negative regulation of antigen receptor-mediated signaling pathway	1	19	0.06469	0.255698	MGP_C57BL6NJ_G0024287(Plcl2)
BP	GO:0097205	renal filtration	1	19	0.06469	0.255698	MGP_C57BL6NJ_G0017366(Cd34)
BP	GO:0140112	extracellular vesicle biogenesis	1	19	0.06469	0.255698	MGP_C57BL6NJ_G0017366(Cd34)
BP	GO:1903579	negative regulation of ATP metabolic process	1	19	0.06469	0.255698	MGP_C57BL6NJ_G0016617(Pid1)
BP	GO:1904376	negative regulation of protein localization to cell periphery	1	19	0.06469	0.255698	MGP_C57BL6NJ_G0016617(Pid1)
BP	GO:0051336	regulation of hydrolase activity	7	1018	0.06492	0.256216	MGP_C57BL6NJ_G0016210(St18),MGP_C57BL6NJ_G0021900(Adra1a),MGP_C57BL6NJ_G0021906(Ppp2r2a),MGP_C57BL6NJ_G0022301(Asap1),MGP_C57BL6NJ_G0022517(Mkl1),MGP_C57BL6NJ_G0026118(Dennd1a),MGP_C57BL6NJ_G0034792(Nrp1)
BP	GO:0030029	actin filament-based process	5	618	0.06546	0.257954	MGP_C57BL6NJ_G0022517(Mkl1),MGP_C57BL6NJ_G0024409(Myom1),MGP_C57BL6NJ_G0028281(Ap1ar),MGP_C57BL6NJ_G0029285(Epb41),MGP_C57BL6NJ_G0034792(Nrp1)
BP	GO:0008645	hexose transport	2	119	0.06557	0.257957	MGP_C57BL6NJ_G0016617(Pid1),MGP_C57BL6NJ_G0033450(Prkcb)
BP	GO:1901342	regulation of vasculature development	3	264	0.06566	0.257957	MGP_C57BL6NJ_G0017366(Cd34),MGP_C57BL6NJ_G0033450(Prkcb),MGP_C57BL6NJ_G0034792(Nrp1)
MF	GO:0048156	tau protein binding	1	19	0.06579	0.258076	MGP_C57BL6NJ_G0021906(Ppp2r2a)
BP	GO:0050789	regulation of biological process	42	10187	0.06631	0.259643	MGP_C57BL6NJ_G0016210(St18),MGP_C57BL6NJ_G0016429(Satb2),MGP_C57BL6NJ_G0016617(Pid1),MGP_C57BL6NJ_G0016967(Trove2),MGP_C57BL6NJ_G0016986(Fam129a),MGP_C57BL6NJ_G0017366(Cd34),MGP_C57BL6NJ_G0017454(Pde7b),MGP_C57BL6NJ_G0018428(Tns3),MGP_C57BL6NJ_G0019711(Pitpnc1),MGP_C57BL6NJ_G0020351(Batf),MGP_C57BL6NJ_G0020402(Efcab11),MGP_C57BL6NJ_G0020849(Rreb1),MGP_C57BL6NJ_G0021322(Il6st),MGP_C57BL6NJ_G002158…
BP	GO:0051128	regulation of cellular component organization	12	2140	0.06639	0.259643	MGP_C57BL6NJ_G0016617(Pid1),MGP_C57BL6NJ_G0020849(Rreb1),MGP_C57BL6NJ_G0021878(Hmbox1),MGP_C57BL6NJ_G0022290(Nsmce2),MGP_C57BL6NJ_G0022301(Asap1),MGP_C57BL6NJ_G0024426(Ehd3),MGP_C57BL6NJ_G0024850(Csnk1g3),MGP_C57BL6NJ_G0026135(Zeb2),MGP_C57BL6NJ_G0028281(Ap1ar),MGP_C57BL6NJ_G0029285(Epb41),MGP_C57BL6NJ_G0030171(Cdkl2),MGP_C57BL6NJ_G0034792(Nrp1)
BP	GO:2000113	negative regulation of cellular macromolecule biosynthetic process	8	1237	0.06657	0.259677	MGP_C57BL6NJ_G0016210(St18),MGP_C57BL6NJ_G0016429(Satb2),MGP_C57BL6NJ_G0016617(Pid1),MGP_C57BL6NJ_G0020849(Rreb1),MGP_C57BL6NJ_G0021878(Hmbox1),MGP_C57BL6NJ_G0021963(Itm2b),MGP_C57BL6NJ_G0026135(Zeb2),MGP_C57BL6NJ_G0035602(Syncrip)
CC	GO:0016460	myosin II complex	1	20	0.0668	0.259677	MGP_C57BL6NJ_G0024409(Myom1)
CC	GO:0045259	proton-transporting ATP synthase complex	1	20	0.0668	0.259677	MGP_C57BL6NJ_G0026261(Atp5g3)
CC	GO:0060077	inhibitory synapse	1	20	0.0668	0.259677	MGP_C57BL6NJ_G0020259(Gphn)
BP	GO:0015749	monosaccharide transport	2	121	0.06751	0.261508	MGP_C57BL6NJ_G0016617(Pid1),MGP_C57BL6NJ_G0033450(Prkcb)
BP	GO:0018210	peptidyl-threonine modification	2	121	0.06751	0.261508	MGP_C57BL6NJ_G0024850(Csnk1g3),MGP_C57BL6NJ_G0033450(Prkcb)
MF	GO:0019838	growth factor binding	2	119	0.06759	0.261508	MGP_C57BL6NJ_G0021322(Il6st),MGP_C57BL6NJ_G0034792(Nrp1)
BP	GO:0002335	mature B cell differentiation	1	20	0.06797	0.261508	MGP_C57BL6NJ_G0024287(Plcl2)
BP	GO:0043369	CD4-positive or CD8-positive, alpha-beta T cell lineage commitment	1	20	0.06797	0.261508	MGP_C57BL6NJ_G0020351(Batf)
BP	GO:0048843	negative regulation of axon extension involved in axon guidance	1	20	0.06797	0.261508	MGP_C57BL6NJ_G0034792(Nrp1)
BP	GO:0060271	cilium assembly	3	268	0.06804	0.261508	MGP_C57BL6NJ_G0016967(Trove2),MGP_C57BL6NJ_G0022301(Asap1),MGP_C57BL6NJ_G0024426(Ehd3)
BP	GO:0030031	cell projection assembly	4	439	0.06818	0.261508	MGP_C57BL6NJ_G0016967(Trove2),MGP_C57BL6NJ_G0022301(Asap1),MGP_C57BL6NJ_G0024426(Ehd3),MGP_C57BL6NJ_G0034792(Nrp1)
BP	GO:0072503	cellular divalent inorganic cation homeostasis	4	439	0.06818	0.261508	MGP_C57BL6NJ_G0021322(Il6st),MGP_C57BL6NJ_G0021587(Ptger2),MGP_C57BL6NJ_G0021900(Adra1a),MGP_C57BL6NJ_G0033450(Prkcb)
MF	GO:0019903	protein phosphatase binding	2	120	0.06858	0.262653	MGP_C57BL6NJ_G0019782(Armc7),MGP_C57BL6NJ_G0021906(Ppp2r2a)
MF	GO:0003785	actin monomer binding	1	20	0.06913	0.263857	MGP_C57BL6NJ_G0022517(Mkl1)
MF	GO:0070412	R-SMAD binding	1	20	0.06913	0.263857	MGP_C57BL6NJ_G0026135(Zeb2)
CC	GO:0000781	chromosome, telomeric region	2	125	0.0692	0.263857	MGP_C57BL6NJ_G0021878(Hmbox1),MGP_C57BL6NJ_G0022290(Nsmce2)
BP	GO:0007264	small GTPase mediated signal transduction	4	442	0.06954	0.264071	MGP_C57BL6NJ_G0021900(Adra1a),MGP_C57BL6NJ_G0024539(Rab18),MGP_C57BL6NJ_G0026118(Dennd1a),MGP_C57BL6NJ_G0034792(Nrp1)
CC	GO:0071782	endoplasmic reticulum tubular network	1	21	0.07	0.264071	MGP_C57BL6NJ_G0024539(Rab18)
CC	GO:0099091	postsynaptic specialization, intracellular component	1	21	0.07	0.264071	MGP_C57BL6NJ_G0020259(Gphn)
BP	GO:0009892	negative regulation of metabolic process	13	2396	0.07007	0.264071	MGP_C57BL6NJ_G0016210(St18),MGP_C57BL6NJ_G0016429(Satb2),MGP_C57BL6NJ_G0016617(Pid1),MGP_C57BL6NJ_G0016986(Fam129a),MGP_C57BL6NJ_G0017366(Cd34),MGP_C57BL6NJ_G0020849(Rreb1),MGP_C57BL6NJ_G0021878(Hmbox1),MGP_C57BL6NJ_G0021900(Adra1a),MGP_C57BL6NJ_G0021963(Itm2b),MGP_C57BL6NJ_G0022517(Mkl1),MGP_C57BL6NJ_G0026135(Zeb2),MGP_C57BL6NJ_G0028281(Ap1ar),MGP_C57BL6NJ_G0035602(Syncrip)
BP	GO:0002520	immune system development	6	830	0.07034	0.264071	MGP_C57BL6NJ_G0016967(Trove2),MGP_C57BL6NJ_G0017366(Cd34),MGP_C57BL6NJ_G0020351(Batf),MGP_C57BL6NJ_G0024287(Plcl2),MGP_C57BL6NJ_G0031664(Mfap5),MGP_C57BL6NJ_G0035015(Fli1)
BP	GO:0040011	locomotion	9	1473	0.07058	0.264071	MGP_C57BL6NJ_G0016429(Satb2),MGP_C57BL6NJ_G0017366(Cd34),MGP_C57BL6NJ_G0018428(Tns3),MGP_C57BL6NJ_G0020849(Rreb1),MGP_C57BL6NJ_G0021322(Il6st),MGP_C57BL6NJ_G0022517(Mkl1),MGP_C57BL6NJ_G0026135(Zeb2),MGP_C57BL6NJ_G0028281(Ap1ar),MGP_C57BL6NJ_G0034792(Nrp1)
BP	GO:0001919	regulation of receptor recycling	1	21	0.07125	0.264071	MGP_C57BL6NJ_G0028281(Ap1ar)
BP	GO:0003085	negative regulation of systemic arterial blood pressure	1	21	0.07125	0.264071	MGP_C57BL6NJ_G0021900(Adra1a)
BP	GO:0007020	microtubule nucleation	1	21	0.07125	0.264071	MGP_C57BL6NJ_G0020402(Efcab11)
BP	GO:0032703	negative regulation of interleukin-2 production	1	21	0.07125	0.264071	MGP_C57BL6NJ_G0017366(Cd34)
BP	GO:0035767	endothelial cell chemotaxis	1	21	0.07125	0.264071	MGP_C57BL6NJ_G0034792(Nrp1)
BP	GO:0051481	negative regulation of cytosolic calcium ion concentration	1	21	0.07125	0.264071	MGP_C57BL6NJ_G0021322(Il6st)
BP	GO:0060216	definitive hemopoiesis	1	21	0.07125	0.264071	MGP_C57BL6NJ_G0031664(Mfap5)
BP	GO:0060445	branching involved in salivary gland morphogenesis	1	21	0.07125	0.264071	MGP_C57BL6NJ_G0034792(Nrp1)
BP	GO:0061437	renal system vasculature development	1	21	0.07125	0.264071	MGP_C57BL6NJ_G0034792(Nrp1)
BP	GO:0061440	kidney vasculature development	1	21	0.07125	0.264071	MGP_C57BL6NJ_G0034792(Nrp1)
BP	GO:0071425	hematopoietic stem cell proliferation	1	21	0.07125	0.264071	MGP_C57BL6NJ_G0017366(Cd34)
BP	GO:1900274	regulation of phospholipase C activity	1	21	0.07125	0.264071	MGP_C57BL6NJ_G0021900(Adra1a)
BP	GO:1902668	negative regulation of axon guidance	1	21	0.07125	0.264071	MGP_C57BL6NJ_G0034792(Nrp1)
BP	GO:0018193	peptidyl-amino acid modification	7	1041	0.07138	0.264071	MGP_C57BL6NJ_G0021322(Il6st),MGP_C57BL6NJ_G0021900(Adra1a),MGP_C57BL6NJ_G0022290(Nsmce2),MGP_C57BL6NJ_G0024287(Plcl2),MGP_C57BL6NJ_G0024850(Csnk1g3),MGP_C57BL6NJ_G0033450(Prkcb),MGP_C57BL6NJ_G0034792(Nrp1)
BP	GO:0007275	multicellular organism development	21	4400	0.07143	0.264071	MGP_C57BL6NJ_G0016429(Satb2),MGP_C57BL6NJ_G0016967(Trove2),MGP_C57BL6NJ_G0017366(Cd34),MGP_C57BL6NJ_G0018428(Tns3),MGP_C57BL6NJ_G0020351(Batf),MGP_C57BL6NJ_G0020849(Rreb1),MGP_C57BL6NJ_G0021322(Il6st),MGP_C57BL6NJ_G0021900(Adra1a),MGP_C57BL6NJ_G0021963(Itm2b),MGP_C57BL6NJ_G0022301(Asap1),MGP_C57BL6NJ_G0022517(Mkl1),MGP_C57BL6NJ_G0024287(Plcl2),MGP_C57BL6NJ_G0024409(Myom1),MGP_C57BL6NJ_G0024539(Ra…
CC	GO:0044459	plasma membrane part	13	2449	0.0715	0.264071	MGP_C57BL6NJ_G0017366(Cd34),MGP_C57BL6NJ_G0019782(Armc7),MGP_C57BL6NJ_G0020259(Gphn),MGP_C57BL6NJ_G0021322(Il6st),MGP_C57BL6NJ_G0021900(Adra1a),MGP_C57BL6NJ_G0022301(Asap1),MGP_C57BL6NJ_G0024426(Ehd3),MGP_C57BL6NJ_G0024539(Rab18),MGP_C57BL6NJ_G0026118(Dennd1a),MGP_C57BL6NJ_G0026178(Cd302),MGP_C57BL6NJ_G0028496(Slc7a13),MGP_C57BL6NJ_G0029285(Epb41),MGP_C57BL6NJ_G0033450(Prkcb)
BP	GO:0018209	peptidyl-serine modification	3	274	0.07168	0.264358	MGP_C57BL6NJ_G0024287(Plcl2),MGP_C57BL6NJ_G0024850(Csnk1g3),MGP_C57BL6NJ_G0033450(Prkcb)
BP	GO:0051173	positive regulation of nitrogen compound metabolic process	14	2646	0.07184	0.264571	MGP_C57BL6NJ_G0016210(St18),MGP_C57BL6NJ_G0016429(Satb2),MGP_C57BL6NJ_G0016617(Pid1),MGP_C57BL6NJ_G0016986(Fam129a),MGP_C57BL6NJ_G0020351(Batf),MGP_C57BL6NJ_G0020849(Rreb1),MGP_C57BL6NJ_G0021322(Il6st),MGP_C57BL6NJ_G0021878(Hmbox1),MGP_C57BL6NJ_G0021900(Adra1a),MGP_C57BL6NJ_G0022517(Mkl1),MGP_C57BL6NJ_G0026135(Zeb2),MGP_C57BL6NJ_G0033450(Prkcb),MGP_C57BL6NJ_G0034792(Nrp1),MGP_C57BL6NJ_G0035015(Fl…
BP	GO:0006810	transport	19	3895	0.07271	0.267219	MGP_C57BL6NJ_G0016617(Pid1),MGP_C57BL6NJ_G0017366(Cd34),MGP_C57BL6NJ_G0019711(Pitpnc1),MGP_C57BL6NJ_G0021900(Adra1a),MGP_C57BL6NJ_G0024409(Myom1),MGP_C57BL6NJ_G0024426(Ehd3),MGP_C57BL6NJ_G0024539(Rab18),MGP_C57BL6NJ_G0024850(Csnk1g3),MGP_C57BL6NJ_G0026118(Dennd1a),MGP_C57BL6NJ_G0026178(Cd302),MGP_C57BL6NJ_G0026261(Atp5g3),MGP_C57BL6NJ_G0028281(Ap1ar),MGP_C57BL6NJ_G0028496(Slc7a13),MGP_C57BL6NJ_G0…
CC	GO:0005865	striated muscle thin filament	1	22	0.0732	0.267219	MGP_C57BL6NJ_G0024409(Myom1)
MF	GO:0033218	amide binding	3	272	0.0734	0.267219	MGP_C57BL6NJ_G0021963(Itm2b),MGP_C57BL6NJ_G0022301(Asap1),MGP_C57BL6NJ_G0024850(Csnk1g3)
CC	GO:0031253	cell projection membrane	3	282	0.0735	0.267219	MGP_C57BL6NJ_G0022301(Asap1),MGP_C57BL6NJ_G0024426(Ehd3),MGP_C57BL6NJ_G0033450(Prkcb)
BP	GO:0072521	purine-containing compound metabolic process	4	451	0.0737	0.267219	MGP_C57BL6NJ_G0016617(Pid1),MGP_C57BL6NJ_G0017454(Pde7b),MGP_C57BL6NJ_G0020259(Gphn),MGP_C57BL6NJ_G0026261(Atp5g3)
BP	GO:0048468	cell development	11	1944	0.07397	0.267219	MGP_C57BL6NJ_G0016429(Satb2),MGP_C57BL6NJ_G0020849(Rreb1),MGP_C57BL6NJ_G0021322(Il6st),MGP_C57BL6NJ_G0021900(Adra1a),MGP_C57BL6NJ_G0022301(Asap1),MGP_C57BL6NJ_G0022517(Mkl1),MGP_C57BL6NJ_G0024409(Myom1),MGP_C57BL6NJ_G0026135(Zeb2),MGP_C57BL6NJ_G0028281(Ap1ar),MGP_C57BL6NJ_G0034792(Nrp1),MGP_C57BL6NJ_G0035015(Fli1)
CC	GO:0031674	I band	2	130	0.0741	0.267219	MGP_C57BL6NJ_G0021900(Adra1a),MGP_C57BL6NJ_G0024409(Myom1)
BP	GO:0050851	antigen receptor-mediated signaling pathway	2	128	0.07442	0.267219	MGP_C57BL6NJ_G0024287(Plcl2),MGP_C57BL6NJ_G0033450(Prkcb)
BP	GO:0044267	cellular protein metabolic process	20	4162	0.07442	0.267219	MGP_C57BL6NJ_G0016210(St18),MGP_C57BL6NJ_G0016617(Pid1),MGP_C57BL6NJ_G0016986(Fam129a),MGP_C57BL6NJ_G0020259(Gphn),MGP_C57BL6NJ_G0021322(Il6st),MGP_C57BL6NJ_G0021900(Adra1a),MGP_C57BL6NJ_G0021906(Ppp2r2a),MGP_C57BL6NJ_G0022290(Nsmce2),MGP_C57BL6NJ_G0022517(Mkl1),MGP_C57BL6NJ_G0024287(Plcl2),MGP_C57BL6NJ_G0024850(Csnk1g3),MGP_C57BL6NJ_G0026135(Zeb2),MGP_C57BL6NJ_G0028083(Man1a2),MGP_C57BL6NJ_G0030…
BP	GO:0006929	substrate-dependent cell migration	1	22	0.07452	0.267219	MGP_C57BL6NJ_G0034792(Nrp1)
BP	GO:0035561	regulation of chromatin binding	1	22	0.07452	0.267219	MGP_C57BL6NJ_G0021878(Hmbox1)
BP	GO:0048485	sympathetic nervous system development	1	22	0.07452	0.267219	MGP_C57BL6NJ_G0034792(Nrp1)
BP	GO:0051984	positive regulation of chromosome segregation	1	22	0.07452	0.267219	MGP_C57BL6NJ_G0022290(Nsmce2)
BP	GO:0055003	cardiac myofibril assembly	1	22	0.07452	0.267219	MGP_C57BL6NJ_G0024409(Myom1)
BP	GO:0060004	reflex	1	22	0.07452	0.267219	MGP_C57BL6NJ_G0021900(Adra1a)
BP	GO:0071800	podosome assembly	1	22	0.07452	0.267219	MGP_C57BL6NJ_G0022301(Asap1)
BP	GO:1900120	regulation of receptor binding	1	22	0.07452	0.267219	MGP_C57BL6NJ_G0024287(Plcl2)
BP	GO:1901890	positive regulation of cell junction assembly	1	22	0.07452	0.267219	MGP_C57BL6NJ_G0034792(Nrp1)
BP	GO:2001273	regulation of glucose import in response to insulin stimulus	1	22	0.07452	0.267219	MGP_C57BL6NJ_G0016617(Pid1)
BP	GO:0055080	cation homeostasis	5	644	0.07521	0.26932	MGP_C57BL6NJ_G0021322(Il6st),MGP_C57BL6NJ_G0021587(Ptger2),MGP_C57BL6NJ_G0021900(Adra1a),MGP_C57BL6NJ_G0033450(Prkcb),MGP_C57BL6NJ_G0036487(Abcb7)
MF	GO:0004114	3',5'-cyclic-nucleotide phosphodiesterase activity	1	22	0.07578	0.270613	MGP_C57BL6NJ_G0017454(Pde7b)
MF	GO:0050681	androgen receptor binding	1	22	0.07578	0.270613	MGP_C57BL6NJ_G0033450(Prkcb)
BP	GO:0032268	regulation of cellular protein metabolic process	12	2190	0.07635	0.271703	MGP_C57BL6NJ_G0016210(St18),MGP_C57BL6NJ_G0016617(Pid1),MGP_C57BL6NJ_G0016986(Fam129a),MGP_C57BL6NJ_G0021322(Il6st),MGP_C57BL6NJ_G0021900(Adra1a),MGP_C57BL6NJ_G0021906(Ppp2r2a),MGP_C57BL6NJ_G0022517(Mkl1),MGP_C57BL6NJ_G0024287(Plcl2),MGP_C57BL6NJ_G0026135(Zeb2),MGP_C57BL6NJ_G0032858(Klhl25),MGP_C57BL6NJ_G0034792(Nrp1),MGP_C57BL6NJ_G0035602(Syncrip)
CC	GO:0031430	M band	1	23	0.0764	0.271703	MGP_C57BL6NJ_G0024409(Myom1)
CC	GO:0036379	myofilament	1	23	0.0764	0.271703	MGP_C57BL6NJ_G0024409(Myom1)
BP	GO:0072507	divalent inorganic cation homeostasis	4	458	0.07702	0.273532	MGP_C57BL6NJ_G0021322(Il6st),MGP_C57BL6NJ_G0021587(Ptger2),MGP_C57BL6NJ_G0021900(Adra1a),MGP_C57BL6NJ_G0033450(Prkcb)
BP	GO:0006937	regulation of muscle contraction	2	131	0.07745	0.273569	MGP_C57BL6NJ_G0021900(Adra1a),MGP_C57BL6NJ_G0024426(Ehd3)
BP	GO:0071356	cellular response to tumor necrosis factor	2	131	0.07745	0.273569	MGP_C57BL6NJ_G0016210(St18),MGP_C57BL6NJ_G0016617(Pid1)
BP	GO:0021952	central nervous system projection neuron axonogenesis	1	23	0.07777	0.273569	MGP_C57BL6NJ_G0026135(Zeb2)
BP	GO:0042481	regulation of odontogenesis	1	23	0.07777	0.273569	MGP_C57BL6NJ_G0017366(Cd34)
BP	GO:0071604	transforming growth factor beta production	1	23	0.07777	0.273569	MGP_C57BL6NJ_G0017366(Cd34)
BP	GO:0071634	regulation of transforming growth factor beta production	1	23	0.07777	0.273569	MGP_C57BL6NJ_G0017366(Cd34)
BP	GO:1903393	positive regulation of adherens junction organization	1	23	0.07777	0.273569	MGP_C57BL6NJ_G0034792(Nrp1)
BP	GO:0009101	glycoprotein biosynthetic process	3	284	0.07795	0.27383	MGP_C57BL6NJ_G0021963(Itm2b),MGP_C57BL6NJ_G0028083(Man1a2),MGP_C57BL6NJ_G0034287(Large)
BP	GO:0010605	negative regulation of macromolecule metabolic process	12	2199	0.07824	0.274163	MGP_C57BL6NJ_G0016210(St18),MGP_C57BL6NJ_G0016429(Satb2),MGP_C57BL6NJ_G0016617(Pid1),MGP_C57BL6NJ_G0016986(Fam129a),MGP_C57BL6NJ_G0017366(Cd34),MGP_C57BL6NJ_G0020849(Rreb1),MGP_C57BL6NJ_G0021878(Hmbox1),MGP_C57BL6NJ_G0021963(Itm2b),MGP_C57BL6NJ_G0022517(Mkl1),MGP_C57BL6NJ_G0026135(Zeb2),MGP_C57BL6NJ_G0028281(Ap1ar),MGP_C57BL6NJ_G0035602(Syncrip)
BP	GO:0051188	cofactor biosynthetic process	2	132	0.07847	0.274163	MGP_C57BL6NJ_G0020259(Gphn),MGP_C57BL6NJ_G0025810(Pdss1)
MF	GO:0001077	transcriptional activator activity, RNA polymerase II core promoter proximal region sequence-specific binding	3	280	0.07853	0.274163	MGP_C57BL6NJ_G0016429(Satb2),MGP_C57BL6NJ_G0020351(Batf),MGP_C57BL6NJ_G0035015(Fli1)
MF	GO:1901981	phosphatidylinositol phosphate binding	2	130	0.07876	0.274163	MGP_C57BL6NJ_G0022301(Asap1),MGP_C57BL6NJ_G0026118(Dennd1a)
BP	GO:0060255	regulation of macromolecule metabolic process	23	4972	0.0788	0.274163	MGP_C57BL6NJ_G0016210(St18),MGP_C57BL6NJ_G0016429(Satb2),MGP_C57BL6NJ_G0016617(Pid1),MGP_C57BL6NJ_G0016986(Fam129a),MGP_C57BL6NJ_G0017366(Cd34),MGP_C57BL6NJ_G0020351(Batf),MGP_C57BL6NJ_G0020849(Rreb1),MGP_C57BL6NJ_G0021322(Il6st),MGP_C57BL6NJ_G0021878(Hmbox1),MGP_C57BL6NJ_G0021900(Adra1a),MGP_C57BL6NJ_G0021906(Ppp2r2a),MGP_C57BL6NJ_G0021963(Itm2b),MGP_C57BL6NJ_G0022517(Mkl1),MGP_C57BL6NJ_G0024287…
MF	GO:0004112	cyclic-nucleotide phosphodiesterase activity	1	23	0.07908	0.274163	MGP_C57BL6NJ_G0017454(Pde7b)
MF	GO:0008143	poly(A) binding	1	23	0.07908	0.274163	MGP_C57BL6NJ_G0035602(Syncrip)
MF	GO:0008307	structural constituent of muscle	1	23	0.07908	0.274163	MGP_C57BL6NJ_G0024409(Myom1)
MF	GO:0030507	spectrin binding	1	23	0.07908	0.274163	MGP_C57BL6NJ_G0029285(Epb41)
CC	GO:0000421	autophagosome membrane	1	24	0.0796	0.274163	MGP_C57BL6NJ_G0021924(Gm21685)
CC	GO:0016342	catenin complex	1	24	0.0796	0.274163	MGP_C57BL6NJ_G0019782(Armc7)
BP	GO:0010558	negative regulation of macromolecule biosynthetic process	8	1287	0.07986	0.274163	MGP_C57BL6NJ_G0016210(St18),MGP_C57BL6NJ_G0016429(Satb2),MGP_C57BL6NJ_G0016617(Pid1),MGP_C57BL6NJ_G0020849(Rreb1),MGP_C57BL6NJ_G0021878(Hmbox1),MGP_C57BL6NJ_G0021963(Itm2b),MGP_C57BL6NJ_G0026135(Zeb2),MGP_C57BL6NJ_G0035602(Syncrip)
BP	GO:0098771	inorganic ion homeostasis	5	656	0.07997	0.274163	MGP_C57BL6NJ_G0021322(Il6st),MGP_C57BL6NJ_G0021587(Ptger2),MGP_C57BL6NJ_G0021900(Adra1a),MGP_C57BL6NJ_G0033450(Prkcb),MGP_C57BL6NJ_G0036487(Abcb7)
BP	GO:0042592	homeostatic process	9	1511	0.08005	0.274163	MGP_C57BL6NJ_G0017366(Cd34),MGP_C57BL6NJ_G0021322(Il6st),MGP_C57BL6NJ_G0021587(Ptger2),MGP_C57BL6NJ_G0021878(Hmbox1),MGP_C57BL6NJ_G0021900(Adra1a),MGP_C57BL6NJ_G0022290(Nsmce2),MGP_C57BL6NJ_G0033450(Prkcb),MGP_C57BL6NJ_G0034287(Large),MGP_C57BL6NJ_G0036487(Abcb7)
CC	GO:0044450	microtubule organizing center part	2	136	0.0801	0.274163	MGP_C57BL6NJ_G0020402(Efcab11),MGP_C57BL6NJ_G0029745(Ccdc146)
BP	GO:0044782	cilium organization	3	288	0.08052	0.274163	MGP_C57BL6NJ_G0016967(Trove2),MGP_C57BL6NJ_G0022301(Asap1),MGP_C57BL6NJ_G0024426(Ehd3)
BP	GO:0071229	cellular response to acid chemical	2	134	0.08053	0.274163	MGP_C57BL6NJ_G0016617(Pid1),MGP_C57BL6NJ_G0021587(Ptger2)
BP	GO:0006312	mitotic recombination	1	24	0.08101	0.274163	MGP_C57BL6NJ_G0022290(Nsmce2)
BP	GO:0009154	purine ribonucleotide catabolic process	1	24	0.08101	0.274163	MGP_C57BL6NJ_G0017454(Pde7b)
BP	GO:0009261	ribonucleotide catabolic process	1	24	0.08101	0.274163	MGP_C57BL6NJ_G0017454(Pde7b)
BP	GO:0010460	positive regulation of heart rate	1	24	0.08101	0.274163	MGP_C57BL6NJ_G0021900(Adra1a)
BP	GO:0030318	melanocyte differentiation	1	24	0.08101	0.274163	MGP_C57BL6NJ_G0026135(Zeb2)
BP	GO:0032212	positive regulation of telomere maintenance via telomerase	1	24	0.08101	0.274163	MGP_C57BL6NJ_G0021878(Hmbox1)
BP	GO:0044381	glucose import in response to insulin stimulus	1	24	0.08101	0.274163	MGP_C57BL6NJ_G0016617(Pid1)
BP	GO:0045822	negative regulation of heart contraction	1	24	0.08101	0.274163	MGP_C57BL6NJ_G0021900(Adra1a)
BP	GO:0070584	mitochondrion morphogenesis	1	24	0.08101	0.274163	MGP_C57BL6NJ_G0016617(Pid1)
BP	GO:0072539	T-helper 17 cell differentiation	1	24	0.08101	0.274163	MGP_C57BL6NJ_G0020351(Batf)
BP	GO:1905476	negative regulation of protein localization to membrane	1	24	0.08101	0.274163	MGP_C57BL6NJ_G0016617(Pid1)
BP	GO:0050896	response to stimulus	33	7719	0.08231	0.278199	MGP_C57BL6NJ_G0016210(St18),MGP_C57BL6NJ_G0016429(Satb2),MGP_C57BL6NJ_G0016617(Pid1),MGP_C57BL6NJ_G0016967(Trove2),MGP_C57BL6NJ_G0016986(Fam129a),MGP_C57BL6NJ_G0017366(Cd34),MGP_C57BL6NJ_G0017454(Pde7b),MGP_C57BL6NJ_G0019711(Pitpnc1),MGP_C57BL6NJ_G0020259(Gphn),MGP_C57BL6NJ_G0020351(Batf),MGP_C57BL6NJ_G0020402(Efcab11),MGP_C57BL6NJ_G0020849(Rreb1),MGP_C57BL6NJ_G0021322(Il6st),MGP_C57BL6NJ_G002158…
BP	GO:0010977	negative regulation of neuron projection development	2	136	0.08259	0.278782	MGP_C57BL6NJ_G0022301(Asap1),MGP_C57BL6NJ_G0034792(Nrp1)
BP	GO:0070925	organelle assembly	5	663	0.08282	0.279194	MGP_C57BL6NJ_G0016967(Trove2),MGP_C57BL6NJ_G0017366(Cd34),MGP_C57BL6NJ_G0022301(Asap1),MGP_C57BL6NJ_G0024409(Myom1),MGP_C57BL6NJ_G0024426(Ehd3)
BP	GO:0007165	signal transduction	25	5533	0.08332	0.280514	MGP_C57BL6NJ_G0016210(St18),MGP_C57BL6NJ_G0016617(Pid1),MGP_C57BL6NJ_G0016967(Trove2),MGP_C57BL6NJ_G0017454(Pde7b),MGP_C57BL6NJ_G0019711(Pitpnc1),MGP_C57BL6NJ_G0020351(Batf),MGP_C57BL6NJ_G0020402(Efcab11),MGP_C57BL6NJ_G0020849(Rreb1),MGP_C57BL6NJ_G0021322(Il6st),MGP_C57BL6NJ_G0021587(Ptger2),MGP_C57BL6NJ_G0021900(Adra1a),MGP_C57BL6NJ_G0021963(Itm2b),MGP_C57BL6NJ_G0022517(Mkl1),MGP_C57BL6NJ_G00241…
BP	GO:0003148	outflow tract septum morphogenesis	1	25	0.08424	0.28178	MGP_C57BL6NJ_G0034792(Nrp1)
BP	GO:0046039	GTP metabolic process	1	25	0.08424	0.28178	MGP_C57BL6NJ_G0020259(Gphn)
BP	GO:0051125	regulation of actin nucleation	1	25	0.08424	0.28178	MGP_C57BL6NJ_G0028281(Ap1ar)
BP	GO:0051491	positive regulation of filopodium assembly	1	25	0.08424	0.28178	MGP_C57BL6NJ_G0034792(Nrp1)
BP	GO:0070528	protein kinase C signaling	1	25	0.08424	0.28178	MGP_C57BL6NJ_G0021900(Adra1a)
BP	GO:0021543	pallium development	2	138	0.08468	0.282826	MGP_C57BL6NJ_G0026135(Zeb2),MGP_C57BL6NJ_G0034792(Nrp1)
CC	GO:0000139	Golgi membrane	4	483	0.085	0.282826	MGP_C57BL6NJ_G0021924(Gm21685),MGP_C57BL6NJ_G0021963(Itm2b),MGP_C57BL6NJ_G0028083(Man1a2),MGP_C57BL6NJ_G0034287(Large)
BP	GO:0060284	regulation of cell development	6	873	0.08504	0.282826	MGP_C57BL6NJ_G0020849(Rreb1),MGP_C57BL6NJ_G0021322(Il6st),MGP_C57BL6NJ_G0022301(Asap1),MGP_C57BL6NJ_G0026135(Zeb2),MGP_C57BL6NJ_G0028281(Ap1ar),MGP_C57BL6NJ_G0034792(Nrp1)
MF	GO:0016772	transferase activity, transferring phosphorus-containing groups	6	858	0.08506	0.282826	MGP_C57BL6NJ_G0020259(Gphn),MGP_C57BL6NJ_G0021878(Hmbox1),MGP_C57BL6NJ_G0024850(Csnk1g3),MGP_C57BL6NJ_G0030171(Cdkl2),MGP_C57BL6NJ_G0033450(Prkcb),MGP_C57BL6NJ_G0034792(Nrp1)
BP	GO:0048523	negative regulation of cellular process	19	3971	0.08523	0.282826	MGP_C57BL6NJ_G0016210(St18),MGP_C57BL6NJ_G0016429(Satb2),MGP_C57BL6NJ_G0016617(Pid1),MGP_C57BL6NJ_G0016986(Fam129a),MGP_C57BL6NJ_G0017366(Cd34),MGP_C57BL6NJ_G0020849(Rreb1),MGP_C57BL6NJ_G0021322(Il6st),MGP_C57BL6NJ_G0021878(Hmbox1),MGP_C57BL6NJ_G0021900(Adra1a),MGP_C57BL6NJ_G0021963(Itm2b),MGP_C57BL6NJ_G0022301(Asap1),MGP_C57BL6NJ_G0022517(Mkl1),MGP_C57BL6NJ_G0024287(Plcl2),MGP_C57BL6NJ_G0026135(…
MF	GO:0034061	DNA polymerase activity	1	25	0.08566	0.282826	MGP_C57BL6NJ_G0021878(Hmbox1)
BP	GO:0019933	cAMP-mediated signaling	2	139	0.08573	0.282826	MGP_C57BL6NJ_G0021587(Ptger2),MGP_C57BL6NJ_G0021900(Adra1a)
BP	GO:0099504	synaptic vesicle cycle	2	139	0.08573	0.282826	MGP_C57BL6NJ_G0021900(Adra1a),MGP_C57BL6NJ_G0026118(Dennd1a)
BP	GO:0010256	endomembrane system organization	3	296	0.08578	0.282826	MGP_C57BL6NJ_G0022301(Asap1),MGP_C57BL6NJ_G0024426(Ehd3),MGP_C57BL6NJ_G0024539(Rab18)
CC	GO:0042734	presynaptic membrane	2	142	0.0862	0.282826	MGP_C57BL6NJ_G0021900(Adra1a),MGP_C57BL6NJ_G0026118(Dennd1a)
BP	GO:0001773	myeloid dendritic cell activation	1	26	0.08746	0.282826	MGP_C57BL6NJ_G0020351(Batf)
BP	GO:0002026	regulation of the force of heart contraction	1	26	0.08746	0.282826	MGP_C57BL6NJ_G0021900(Adra1a)
BP	GO:0007214	gamma-aminobutyric acid signaling pathway	1	26	0.08746	0.282826	MGP_C57BL6NJ_G0024287(Plcl2)
BP	GO:0015991	ATP hydrolysis coupled proton transport	1	26	0.08746	0.282826	MGP_C57BL6NJ_G0026261(Atp5g3)
BP	GO:0021602	cranial nerve morphogenesis	1	26	0.08746	0.282826	MGP_C57BL6NJ_G0034792(Nrp1)
BP	GO:0032733	positive regulation of interleukin-10 production	1	26	0.08746	0.282826	MGP_C57BL6NJ_G0017366(Cd34)
BP	GO:0034314	Arp2/3 complex-mediated actin nucleation	1	26	0.08746	0.282826	MGP_C57BL6NJ_G0028281(Ap1ar)
BP	GO:0042832	defense response to protozoan	1	26	0.08746	0.282826	MGP_C57BL6NJ_G0020351(Batf)
BP	GO:0048841	regulation of axon extension involved in axon guidance	1	26	0.08746	0.282826	MGP_C57BL6NJ_G0034792(Nrp1)
BP	GO:0060384	innervation	1	26	0.08746	0.282826	MGP_C57BL6NJ_G0034792(Nrp1)
BP	GO:0060977	coronary vasculature morphogenesis	1	26	0.08746	0.282826	MGP_C57BL6NJ_G0034792(Nrp1)
BP	GO:0070306	lens fiber cell differentiation	1	26	0.08746	0.282826	MGP_C57BL6NJ_G0026135(Zeb2)
BP	GO:0097028	dendritic cell differentiation	1	26	0.08746	0.282826	MGP_C57BL6NJ_G0020351(Batf)
BP	GO:1901661	quinone metabolic process	1	26	0.08746	0.282826	MGP_C57BL6NJ_G0025810(Pdss1)
BP	GO:1902745	positive regulation of lamellipodium organization	1	26	0.08746	0.282826	MGP_C57BL6NJ_G0020849(Rreb1)
BP	GO:1903427	negative regulation of reactive oxygen species biosynthetic process	1	26	0.08746	0.282826	MGP_C57BL6NJ_G0017366(Cd34)
BP	GO:0006417	regulation of translation	3	299	0.08779	0.282826	MGP_C57BL6NJ_G0016986(Fam129a),MGP_C57BL6NJ_G0032858(Klhl25),MGP_C57BL6NJ_G0035602(Syncrip)
BP	GO:0048489	synaptic vesicle transport	2	141	0.08783	0.282826	MGP_C57BL6NJ_G0021900(Adra1a),MGP_C57BL6NJ_G0026118(Dennd1a)
BP	GO:0097480	establishment of synaptic vesicle localization	2	141	0.08783	0.282826	MGP_C57BL6NJ_G0021900(Adra1a),MGP_C57BL6NJ_G0026118(Dennd1a)
BP	GO:1903034	regulation of response to wounding	2	141	0.08783	0.282826	MGP_C57BL6NJ_G0017366(Cd34),MGP_C57BL6NJ_G0020849(Rreb1)
BP	GO:0035556	intracellular signal transduction	12	2244	0.08815	0.283504	MGP_C57BL6NJ_G0020351(Batf),MGP_C57BL6NJ_G0020402(Efcab11),MGP_C57BL6NJ_G0021322(Il6st),MGP_C57BL6NJ_G0021587(Ptger2),MGP_C57BL6NJ_G0021900(Adra1a),MGP_C57BL6NJ_G0024287(Plcl2),MGP_C57BL6NJ_G0024409(Myom1),MGP_C57BL6NJ_G0024539(Rab18),MGP_C57BL6NJ_G0026118(Dennd1a),MGP_C57BL6NJ_G0026135(Zeb2),MGP_C57BL6NJ_G0033450(Prkcb),MGP_C57BL6NJ_G0034792(Nrp1)
BP	GO:0008360	regulation of cell shape	2	142	0.08889	0.28495	MGP_C57BL6NJ_G0024850(Csnk1g3),MGP_C57BL6NJ_G0029285(Epb41)
BP	GO:2001252	positive regulation of chromosome organization	2	142	0.08889	0.28495	MGP_C57BL6NJ_G0021878(Hmbox1),MGP_C57BL6NJ_G0022290(Nsmce2)
MF	GO:0070566	adenylyltransferase activity	1	26	0.08893	0.28495	MGP_C57BL6NJ_G0020259(Gphn)
BP	GO:0048585	negative regulation of response to stimulus	8	1320	0.08945	0.285577	MGP_C57BL6NJ_G0016617(Pid1),MGP_C57BL6NJ_G0017366(Cd34),MGP_C57BL6NJ_G0021322(Il6st),MGP_C57BL6NJ_G0021900(Adra1a),MGP_C57BL6NJ_G0022517(Mkl1),MGP_C57BL6NJ_G0024287(Plcl2),MGP_C57BL6NJ_G0033450(Prkcb),MGP_C57BL6NJ_G0034792(Nrp1)
CC	GO:0098552	side of membrane	4	492	0.0896	0.285577	MGP_C57BL6NJ_G0017366(Cd34),MGP_C57BL6NJ_G0020259(Gphn),MGP_C57BL6NJ_G0021322(Il6st),MGP_C57BL6NJ_G0029285(Epb41)
BP	GO:0002360	T cell lineage commitment	1	27	0.09067	0.285577	MGP_C57BL6NJ_G0020351(Batf)
BP	GO:0006195	purine nucleotide catabolic process	1	27	0.09067	0.285577	MGP_C57BL6NJ_G0017454(Pde7b)
BP	GO:0006903	vesicle targeting	1	27	0.09067	0.285577	MGP_C57BL6NJ_G0028281(Ap1ar)
BP	GO:0008045	motor neuron axon guidance	1	27	0.09067	0.285577	MGP_C57BL6NJ_G0034792(Nrp1)
BP	GO:0015988	energy coupled proton transmembrane transport, against electrochemical gradient	1	27	0.09067	0.285577	MGP_C57BL6NJ_G0026261(Atp5g3)
BP	GO:0030947	regulation of vascular endothelial growth factor receptor signaling pathway	1	27	0.09067	0.285577	MGP_C57BL6NJ_G0033450(Prkcb)
BP	GO:0044319	wound healing, spreading of cells	1	27	0.09067	0.285577	MGP_C57BL6NJ_G0020849(Rreb1)
BP	GO:0048668	collateral sprouting	1	27	0.09067	0.285577	MGP_C57BL6NJ_G0026135(Zeb2)
BP	GO:0051973	positive regulation of telomerase activity	1	27	0.09067	0.285577	MGP_C57BL6NJ_G0021878(Hmbox1)
BP	GO:0072538	T-helper 17 type immune response	1	27	0.09067	0.285577	MGP_C57BL6NJ_G0020351(Batf)
BP	GO:0090505	epiboly involved in wound healing	1	27	0.09067	0.285577	MGP_C57BL6NJ_G0020849(Rreb1)
BP	GO:1904358	positive regulation of telomere maintenance via telomere lengthening	1	27	0.09067	0.285577	MGP_C57BL6NJ_G0021878(Hmbox1)
BP	GO:0055002	striated muscle cell development	2	144	0.09103	0.285763	MGP_C57BL6NJ_G0021900(Adra1a),MGP_C57BL6NJ_G0024409(Myom1)
BP	GO:0099003	vesicle-mediated transport in synapse	2	144	0.09103	0.285763	MGP_C57BL6NJ_G0021900(Adra1a),MGP_C57BL6NJ_G0026118(Dennd1a)
BP	GO:0007169	transmembrane receptor protein tyrosine kinase signaling pathway	4	486	0.09106	0.285763	MGP_C57BL6NJ_G0016617(Pid1),MGP_C57BL6NJ_G0033002(Gab2),MGP_C57BL6NJ_G0033450(Prkcb),MGP_C57BL6NJ_G0034792(Nrp1)
MF	GO:0042578	phosphoric ester hydrolase activity	3	299	0.09135	0.286326	MGP_C57BL6NJ_G0017454(Pde7b),MGP_C57BL6NJ_G0021906(Ppp2r2a),MGP_C57BL6NJ_G0024287(Plcl2)
BP	GO:0043085	positive regulation of catalytic activity	7	1106	0.09168	0.287013	MGP_C57BL6NJ_G0016210(St18),MGP_C57BL6NJ_G0021878(Hmbox1),MGP_C57BL6NJ_G0021900(Adra1a),MGP_C57BL6NJ_G0022301(Asap1),MGP_C57BL6NJ_G0026118(Dennd1a),MGP_C57BL6NJ_G0026135(Zeb2),MGP_C57BL6NJ_G0034792(Nrp1)
BP	GO:0008643	carbohydrate transport	2	145	0.0921	0.287251	MGP_C57BL6NJ_G0016617(Pid1),MGP_C57BL6NJ_G0033450(Prkcb)
MF	GO:0015020	glucuronosyltransferase activity	1	27	0.0922	0.287251	MGP_C57BL6NJ_G0034287(Large)
MF	GO:0017112	Rab guanyl-nucleotide exchange factor activity	1	27	0.0922	0.287251	MGP_C57BL6NJ_G0026118(Dennd1a)
MF	GO:0044769	ATPase activity, coupled to transmembrane movement of ions, rotational mechanism	1	27	0.0922	0.287251	MGP_C57BL6NJ_G0026261(Atp5g3)
BP	GO:0035051	cardiocyte differentiation	2	146	0.09317	0.288275	MGP_C57BL6NJ_G0021900(Adra1a),MGP_C57BL6NJ_G0024409(Myom1)
BP	GO:0031325	positive regulation of cellular metabolic process	14	2753	0.09318	0.288275	MGP_C57BL6NJ_G0016210(St18),MGP_C57BL6NJ_G0016429(Satb2),MGP_C57BL6NJ_G0016617(Pid1),MGP_C57BL6NJ_G0016986(Fam129a),MGP_C57BL6NJ_G0020351(Batf),MGP_C57BL6NJ_G0020849(Rreb1),MGP_C57BL6NJ_G0021322(Il6st),MGP_C57BL6NJ_G0021878(Hmbox1),MGP_C57BL6NJ_G0021900(Adra1a),MGP_C57BL6NJ_G0022517(Mkl1),MGP_C57BL6NJ_G0026135(Zeb2),MGP_C57BL6NJ_G0033450(Prkcb),MGP_C57BL6NJ_G0034792(Nrp1),MGP_C57BL6NJ_G0035015(Fl…
BP	GO:0001562	response to protozoan	1	28	0.09387	0.288275	MGP_C57BL6NJ_G0020351(Batf)
BP	GO:0003298	physiological muscle hypertrophy	1	28	0.09387	0.288275	MGP_C57BL6NJ_G0021900(Adra1a)
BP	GO:0003301	physiological cardiac muscle hypertrophy	1	28	0.09387	0.288275	MGP_C57BL6NJ_G0021900(Adra1a)
BP	GO:0008299	isoprenoid biosynthetic process	1	28	0.09387	0.288275	MGP_C57BL6NJ_G0025810(Pdss1)
BP	GO:0033598	mammary gland epithelial cell proliferation	1	28	0.09387	0.288275	MGP_C57BL6NJ_G0020849(Rreb1)
BP	GO:0038084	vascular endothelial growth factor signaling pathway	1	28	0.09387	0.288275	MGP_C57BL6NJ_G0034792(Nrp1)
BP	GO:0061049	cell growth involved in cardiac muscle cell development	1	28	0.09387	0.288275	MGP_C57BL6NJ_G0021900(Adra1a)
BP	GO:0071875	adrenergic receptor signaling pathway	1	28	0.09387	0.288275	MGP_C57BL6NJ_G0021900(Adra1a)
BP	GO:0090504	epiboly	1	28	0.09387	0.288275	MGP_C57BL6NJ_G0020849(Rreb1)
BP	GO:0097502	mannosylation	1	28	0.09387	0.288275	MGP_C57BL6NJ_G0034287(Large)
CC	GO:0005925	focal adhesion	3	314	0.0942	0.288275	MGP_C57BL6NJ_G0018428(Tns3),MGP_C57BL6NJ_G0024426(Ehd3),MGP_C57BL6NJ_G0034792(Nrp1)
BP	GO:0034612	response to tumor necrosis factor	2	147	0.09425	0.288275	MGP_C57BL6NJ_G0016210(St18),MGP_C57BL6NJ_G0016617(Pid1)
BP	GO:0043112	receptor metabolic process	2	147	0.09425	0.288275	MGP_C57BL6NJ_G0024426(Ehd3),MGP_C57BL6NJ_G0028281(Ap1ar)
BP	GO:0055082	cellular chemical homeostasis	5	690	0.09431	0.288275	MGP_C57BL6NJ_G0021322(Il6st),MGP_C57BL6NJ_G0021587(Ptger2),MGP_C57BL6NJ_G0021900(Adra1a),MGP_C57BL6NJ_G0033450(Prkcb),MGP_C57BL6NJ_G0036487(Abcb7)
CC	GO:0043226	organelle	43	10912	0.0948	0.289431	MGP_C57BL6NJ_G0016210(St18),MGP_C57BL6NJ_G0016429(Satb2),MGP_C57BL6NJ_G0016967(Trove2),MGP_C57BL6NJ_G0016986(Fam129a),MGP_C57BL6NJ_G0017366(Cd34),MGP_C57BL6NJ_G0019711(Pitpnc1),MGP_C57BL6NJ_G0019782(Armc7),MGP_C57BL6NJ_G0020259(Gphn),MGP_C57BL6NJ_G0020351(Batf),MGP_C57BL6NJ_G0020402(Efcab11),MGP_C57BL6NJ_G0020849(Rreb1),MGP_C57BL6NJ_G0021322(Il6st),MGP_C57BL6NJ_G0021878(Hmbox1),MGP_C57BL6NJ_G0021…
BP	GO:0016043	cellular component organization	23	5072	0.09494	0.289517	MGP_C57BL6NJ_G0016429(Satb2),MGP_C57BL6NJ_G0016617(Pid1),MGP_C57BL6NJ_G0016967(Trove2),MGP_C57BL6NJ_G0017366(Cd34),MGP_C57BL6NJ_G0020259(Gphn),MGP_C57BL6NJ_G0020402(Efcab11),MGP_C57BL6NJ_G0020849(Rreb1),MGP_C57BL6NJ_G0021878(Hmbox1),MGP_C57BL6NJ_G0022290(Nsmce2),MGP_C57BL6NJ_G0022301(Asap1),MGP_C57BL6NJ_G0022517(Mkl1),MGP_C57BL6NJ_G0024409(Myom1),MGP_C57BL6NJ_G0024426(Ehd3),MGP_C57BL6NJ_G0024539(…
BP	GO:0097479	synaptic vesicle localization	2	148	0.09534	0.290017	MGP_C57BL6NJ_G0021900(Adra1a),MGP_C57BL6NJ_G0026118(Dennd1a)
CC	GO:0032809	neuronal cell body membrane	1	29	0.0954	0.290017	MGP_C57BL6NJ_G0021322(Il6st)
MF	GO:0004693	cyclin-dependent protein serine/threonine kinase activity	1	28	0.09544	0.290017	MGP_C57BL6NJ_G0030171(Cdkl2)
BP	GO:0009653	anatomical structure morphogenesis	12	2277	0.09591	0.291103	MGP_C57BL6NJ_G0016429(Satb2),MGP_C57BL6NJ_G0016617(Pid1),MGP_C57BL6NJ_G0017366(Cd34),MGP_C57BL6NJ_G0020849(Rreb1),MGP_C57BL6NJ_G0024409(Myom1),MGP_C57BL6NJ_G0024850(Csnk1g3),MGP_C57BL6NJ_G0026135(Zeb2),MGP_C57BL6NJ_G0028281(Ap1ar),MGP_C57BL6NJ_G0029285(Epb41),MGP_C57BL6NJ_G0033450(Prkcb),MGP_C57BL6NJ_G0034792(Nrp1),MGP_C57BL6NJ_G0035015(Fli1)
CC	GO:0005924	cell-substrate adherens junction	3	317	0.0962	0.29118	MGP_C57BL6NJ_G0018428(Tns3),MGP_C57BL6NJ_G0024426(Ehd3),MGP_C57BL6NJ_G0034792(Nrp1)
BP	GO:0040007	growth	6	904	0.09663	0.29118	MGP_C57BL6NJ_G0021900(Adra1a),MGP_C57BL6NJ_G0026135(Zeb2),MGP_C57BL6NJ_G0029285(Epb41),MGP_C57BL6NJ_G0033450(Prkcb),MGP_C57BL6NJ_G0034287(Large),MGP_C57BL6NJ_G0034792(Nrp1)
BP	GO:0001654	eye development	3	312	0.09672	0.29118	MGP_C57BL6NJ_G0024539(Rab18),MGP_C57BL6NJ_G0026135(Zeb2),MGP_C57BL6NJ_G0034792(Nrp1)
BP	GO:0010648	negative regulation of cell communication	7	1121	0.09679	0.29118	MGP_C57BL6NJ_G0016617(Pid1),MGP_C57BL6NJ_G0021322(Il6st),MGP_C57BL6NJ_G0021900(Adra1a),MGP_C57BL6NJ_G0022517(Mkl1),MGP_C57BL6NJ_G0024287(Plcl2),MGP_C57BL6NJ_G0033450(Prkcb),MGP_C57BL6NJ_G0034792(Nrp1)
MF	GO:0001047	core promoter binding	2	147	0.09705	0.29118	MGP_C57BL6NJ_G0016210(St18),MGP_C57BL6NJ_G0020849(Rreb1)
BP	GO:0000002	mitochondrial genome maintenance	1	29	0.09706	0.29118	MGP_C57BL6NJ_G0016617(Pid1)
BP	GO:0010613	positive regulation of cardiac muscle hypertrophy	1	29	0.09706	0.29118	MGP_C57BL6NJ_G0021900(Adra1a)
BP	GO:0014742	positive regulation of muscle hypertrophy	1	29	0.09706	0.29118	MGP_C57BL6NJ_G0021900(Adra1a)
BP	GO:0021846	cell proliferation in forebrain	1	29	0.09706	0.29118	MGP_C57BL6NJ_G0026135(Zeb2)
BP	GO:0043403	skeletal muscle tissue regeneration	1	29	0.09706	0.29118	MGP_C57BL6NJ_G0034287(Large)
BP	GO:0010721	negative regulation of cell development	3	313	0.09742	0.291517	MGP_C57BL6NJ_G0022301(Asap1),MGP_C57BL6NJ_G0028281(Ap1ar),MGP_C57BL6NJ_G0034792(Nrp1)
BP	GO:0002285	lymphocyte activation involved in immune response	2	150	0.09751	0.291517	MGP_C57BL6NJ_G0020351(Batf),MGP_C57BL6NJ_G0024287(Plcl2)
BP	GO:0008016	regulation of heart contraction	2	150	0.09751	0.291517	MGP_C57BL6NJ_G0021900(Adra1a),MGP_C57BL6NJ_G0024426(Ehd3)
BP	GO:0042060	wound healing	3	314	0.09813	0.292649	MGP_C57BL6NJ_G0017366(Cd34),MGP_C57BL6NJ_G0020849(Rreb1),MGP_C57BL6NJ_G0034287(Large)
CC	GO:0002102	podosome	1	30	0.0985	0.292649	MGP_C57BL6NJ_G0022301(Asap1)
CC	GO:0033017	sarcoplasmic reticulum membrane	1	30	0.0985	0.292649	MGP_C57BL6NJ_G0034283(Tmem38a)
CC	GO:0044298	cell body membrane	1	30	0.0985	0.292649	MGP_C57BL6NJ_G0021322(Il6st)
MF	GO:0005227	calcium activated cation channel activity	1	29	0.09868	0.292649	MGP_C57BL6NJ_G0034283(Tmem38a)
MF	GO:0070717	poly-purine tract binding	1	29	0.09868	0.292649	MGP_C57BL6NJ_G0035602(Syncrip)
MF	GO:0097472	cyclin-dependent protein kinase activity	1	29	0.09868	0.292649	MGP_C57BL6NJ_G0030171(Cdkl2)
CC	GO:0009898	cytoplasmic side of plasma membrane	2	154	0.0989	0.292966	MGP_C57BL6NJ_G0020259(Gphn),MGP_C57BL6NJ_G0029285(Epb41)
BP	GO:0032869	cellular response to insulin stimulus	2	152	0.0997	0.293938	MGP_C57BL6NJ_G0016617(Pid1),MGP_C57BL6NJ_G0033450(Prkcb)
CC	GO:0030055	cell-substrate junction	3	322	0.0997	0.293938	MGP_C57BL6NJ_G0018428(Tns3),MGP_C57BL6NJ_G0024426(Ehd3),MGP_C57BL6NJ_G0034792(Nrp1)
BP	GO:0008156	negative regulation of DNA replication	1	30	0.10024	0.293938	MGP_C57BL6NJ_G0016617(Pid1)
BP	GO:0010518	positive regulation of phospholipase activity	1	30	0.10024	0.293938	MGP_C57BL6NJ_G0021900(Adra1a)
BP	GO:0048846	axon extension involved in axon guidance	1	30	0.10024	0.293938	MGP_C57BL6NJ_G0034792(Nrp1)
BP	GO:1902284	neuron projection extension involved in neuron projection guidance	1	30	0.10024	0.293938	MGP_C57BL6NJ_G0034792(Nrp1)
BP	GO:1903580	positive regulation of ATP metabolic process	1	30	0.10024	0.293938	MGP_C57BL6NJ_G0016617(Pid1)
BP	GO:1903672	positive regulation of sprouting angiogenesis	1	30	0.10024	0.293938	MGP_C57BL6NJ_G0034792(Nrp1)
BP	GO:0051098	regulation of binding	3	317	0.10025	0.293938	MGP_C57BL6NJ_G0021878(Hmbox1),MGP_C57BL6NJ_G0024287(Plcl2),MGP_C57BL6NJ_G0029285(Epb41)
BP	GO:2000377	regulation of reactive oxygen species metabolic process	2	153	0.1008	0.295216	MGP_C57BL6NJ_G0016617(Pid1),MGP_C57BL6NJ_G0017366(Cd34)
CC	GO:0099738	cell cortex region	1	31	0.1016	0.296788	MGP_C57BL6NJ_G0029285(Epb41)
BP	GO:0002429	immune response-activating cell surface receptor signaling pathway	2	154	0.10191	0.296788	MGP_C57BL6NJ_G0024287(Plcl2),MGP_C57BL6NJ_G0033450(Prkcb)
BP	GO:0050801	ion homeostasis	5	707	0.10196	0.296788	MGP_C57BL6NJ_G0021322(Il6st),MGP_C57BL6NJ_G0021587(Ptger2),MGP_C57BL6NJ_G0021900(Adra1a),MGP_C57BL6NJ_G0033450(Prkcb),MGP_C57BL6NJ_G0036487(Abcb7)
BP	GO:0006461	protein complex assembly	7	1136	0.10206	0.296788	MGP_C57BL6NJ_G0020259(Gphn),MGP_C57BL6NJ_G0020402(Efcab11),MGP_C57BL6NJ_G0022301(Asap1),MGP_C57BL6NJ_G0024409(Myom1),MGP_C57BL6NJ_G0024426(Ehd3),MGP_C57BL6NJ_G0025810(Pdss1),MGP_C57BL6NJ_G0028281(Ap1ar)
BP	GO:0043547	positive regulation of GTPase activity	3	320	0.1024	0.296788	MGP_C57BL6NJ_G0022301(Asap1),MGP_C57BL6NJ_G0026118(Dennd1a),MGP_C57BL6NJ_G0034792(Nrp1)
BP	GO:0070271	protein complex biogenesis	7	1137	0.10241	0.296788	MGP_C57BL6NJ_G0020259(Gphn),MGP_C57BL6NJ_G0020402(Efcab11),MGP_C57BL6NJ_G0022301(Asap1),MGP_C57BL6NJ_G0024409(Myom1),MGP_C57BL6NJ_G0024426(Ehd3),MGP_C57BL6NJ_G0025810(Pdss1),MGP_C57BL6NJ_G0028281(Ap1ar)
BP	GO:0000902	cell morphogenesis	6	920	0.10293	0.296788	MGP_C57BL6NJ_G0020849(Rreb1),MGP_C57BL6NJ_G0024850(Csnk1g3),MGP_C57BL6NJ_G0026135(Zeb2),MGP_C57BL6NJ_G0028281(Ap1ar),MGP_C57BL6NJ_G0029285(Epb41),MGP_C57BL6NJ_G0034792(Nrp1)
BP	GO:0051172	negative regulation of nitrogen compound metabolic process	11	2066	0.10339	0.296788	MGP_C57BL6NJ_G0016210(St18),MGP_C57BL6NJ_G0016429(Satb2),MGP_C57BL6NJ_G0016617(Pid1),MGP_C57BL6NJ_G0016986(Fam129a),MGP_C57BL6NJ_G0017366(Cd34),MGP_C57BL6NJ_G0020849(Rreb1),MGP_C57BL6NJ_G0021878(Hmbox1),MGP_C57BL6NJ_G0021963(Itm2b),MGP_C57BL6NJ_G0022517(Mkl1),MGP_C57BL6NJ_G0026135(Zeb2),MGP_C57BL6NJ_G0035602(Syncrip)
BP	GO:0010737	protein kinase A signaling	1	31	0.1034	0.296788	MGP_C57BL6NJ_G0024409(Myom1)
BP	GO:0021955	central nervous system neuron axonogenesis	1	31	0.1034	0.296788	MGP_C57BL6NJ_G0026135(Zeb2)
BP	GO:0030809	negative regulation of nucleotide biosynthetic process	1	31	0.1034	0.296788	MGP_C57BL6NJ_G0016617(Pid1)
BP	GO:0048255	mRNA stabilization	1	31	0.1034	0.296788	MGP_C57BL6NJ_G0035602(Syncrip)
BP	GO:0090049	regulation of cell migration involved in sprouting angiogenesis	1	31	0.1034	0.296788	MGP_C57BL6NJ_G0034792(Nrp1)
BP	GO:1900372	negative regulation of purine nucleotide biosynthetic process	1	31	0.1034	0.296788	MGP_C57BL6NJ_G0016617(Pid1)
BP	GO:1901021	positive regulation of calcium ion transmembrane transporter activity	1	31	0.1034	0.296788	MGP_C57BL6NJ_G0024426(Ehd3)
BP	GO:1905332	positive regulation of morphogenesis of an epithelium	1	31	0.1034	0.296788	MGP_C57BL6NJ_G0020849(Rreb1)
BP	GO:2000171	negative regulation of dendrite development	1	31	0.1034	0.296788	MGP_C57BL6NJ_G0022301(Asap1)
BP	GO:2000249	regulation of actin cytoskeleton reorganization	1	31	0.1034	0.296788	MGP_C57BL6NJ_G0034792(Nrp1)
BP	GO:0007568	aging	2	156	0.10412	0.298523	MGP_C57BL6NJ_G0021900(Adra1a),MGP_C57BL6NJ_G0022290(Nsmce2)
BP	GO:0001503	ossification	3	323	0.10456	0.298792	MGP_C57BL6NJ_G0016429(Satb2),MGP_C57BL6NJ_G0021322(Il6st),MGP_C57BL6NJ_G0035602(Syncrip)
BP	GO:0001667	ameboidal-type cell migration	3	323	0.10456	0.298792	MGP_C57BL6NJ_G0020849(Rreb1),MGP_C57BL6NJ_G0026135(Zeb2),MGP_C57BL6NJ_G0034792(Nrp1)
BP	GO:0018108	peptidyl-tyrosine phosphorylation	3	323	0.10456	0.298792	MGP_C57BL6NJ_G0021322(Il6st),MGP_C57BL6NJ_G0021900(Adra1a),MGP_C57BL6NJ_G0034792(Nrp1)
MF	GO:0042162	telomeric DNA binding	1	31	0.10512	0.299731	MGP_C57BL6NJ_G0021878(Hmbox1)
MF	GO:0051393	alpha-actinin binding	1	31	0.10512	0.299731	MGP_C57BL6NJ_G0024409(Myom1)
BP	GO:0007435	salivary gland morphogenesis	1	32	0.10655	0.301155	MGP_C57BL6NJ_G0034792(Nrp1)
BP	GO:0016572	histone phosphorylation	1	32	0.10655	0.301155	MGP_C57BL6NJ_G0033450(Prkcb)
BP	GO:0021884	forebrain neuron development	1	32	0.10655	0.301155	MGP_C57BL6NJ_G0034792(Nrp1)
BP	GO:0045987	positive regulation of smooth muscle contraction	1	32	0.10655	0.301155	MGP_C57BL6NJ_G0021900(Adra1a)
BP	GO:0048710	regulation of astrocyte differentiation	1	32	0.10655	0.301155	MGP_C57BL6NJ_G0021322(Il6st)
BP	GO:0071526	semaphorin-plexin signaling pathway	1	32	0.10655	0.301155	MGP_C57BL6NJ_G0034792(Nrp1)
BP	GO:0097106	postsynaptic density organization	1	32	0.10655	0.301155	MGP_C57BL6NJ_G0020259(Gphn)
BP	GO:1903539	protein localization to postsynaptic membrane	1	32	0.10655	0.301155	MGP_C57BL6NJ_G0020259(Gphn)
BP	GO:0018212	peptidyl-tyrosine modification	3	326	0.10674	0.301363	MGP_C57BL6NJ_G0021322(Il6st),MGP_C57BL6NJ_G0021900(Adra1a),MGP_C57BL6NJ_G0034792(Nrp1)
CC	GO:0043229	intracellular organelle	40	10087	0.1076	0.30346	MGP_C57BL6NJ_G0016210(St18),MGP_C57BL6NJ_G0016429(Satb2),MGP_C57BL6NJ_G0016967(Trove2),MGP_C57BL6NJ_G0017366(Cd34),MGP_C57BL6NJ_G0019711(Pitpnc1),MGP_C57BL6NJ_G0019782(Armc7),MGP_C57BL6NJ_G0020259(Gphn),MGP_C57BL6NJ_G0020351(Batf),MGP_C57BL6NJ_G0020402(Efcab11),MGP_C57BL6NJ_G0020849(Rreb1),MGP_C57BL6NJ_G0021878(Hmbox1),MGP_C57BL6NJ_G0021900(Adra1a),MGP_C57BL6NJ_G0021924(Gm21685),MGP_C57BL6NJ_G002…
CC	GO:0030665	clathrin-coated vesicle membrane	1	33	0.1078	0.303693	MGP_C57BL6NJ_G0026118(Dennd1a)
BP	GO:0097190	apoptotic signaling pathway	4	517	0.10793	0.303729	MGP_C57BL6NJ_G0016210(St18),MGP_C57BL6NJ_G0021963(Itm2b),MGP_C57BL6NJ_G0022517(Mkl1),MGP_C57BL6NJ_G0034792(Nrp1)
BP	GO:0007154	cell communication	26	5953	0.10827	0.304355	MGP_C57BL6NJ_G0016210(St18),MGP_C57BL6NJ_G0016617(Pid1),MGP_C57BL6NJ_G0016967(Trove2),MGP_C57BL6NJ_G0017366(Cd34),MGP_C57BL6NJ_G0017454(Pde7b),MGP_C57BL6NJ_G0019711(Pitpnc1),MGP_C57BL6NJ_G0020351(Batf),MGP_C57BL6NJ_G0020402(Efcab11),MGP_C57BL6NJ_G0020849(Rreb1),MGP_C57BL6NJ_G0021322(Il6st),MGP_C57BL6NJ_G0021587(Ptger2),MGP_C57BL6NJ_G0021900(Adra1a),MGP_C57BL6NJ_G0021963(Itm2b),MGP_C57BL6NJ_G00225…
BP	GO:0055001	muscle cell development	2	160	0.1086	0.304952	MGP_C57BL6NJ_G0021900(Adra1a),MGP_C57BL6NJ_G0024409(Myom1)
BP	GO:0009100	glycoprotein metabolic process	3	329	0.10894	0.305244	MGP_C57BL6NJ_G0021963(Itm2b),MGP_C57BL6NJ_G0028083(Man1a2),MGP_C57BL6NJ_G0034287(Large)
BP	GO:0051480	regulation of cytosolic calcium ion concentration	3	329	0.10894	0.305244	MGP_C57BL6NJ_G0021322(Il6st),MGP_C57BL6NJ_G0021587(Ptger2),MGP_C57BL6NJ_G0021900(Adra1a)
MF	GO:0046872	metal ion binding	16	3271	0.10964	0.30671	MGP_C57BL6NJ_G0016210(St18),MGP_C57BL6NJ_G0016967(Trove2),MGP_C57BL6NJ_G0017454(Pde7b),MGP_C57BL6NJ_G0020259(Gphn),MGP_C57BL6NJ_G0020402(Efcab11),MGP_C57BL6NJ_G0020849(Rreb1),MGP_C57BL6NJ_G0022290(Nsmce2),MGP_C57BL6NJ_G0022301(Asap1),MGP_C57BL6NJ_G0024426(Ehd3),MGP_C57BL6NJ_G0024850(Csnk1g3),MGP_C57BL6NJ_G0026135(Zeb2),MGP_C57BL6NJ_G0028083(Man1a2),MGP_C57BL6NJ_G0031590(Mkrn2),MGP_C57BL6NJ_G00334…
BP	GO:0050931	pigment cell differentiation	1	33	0.1097	0.30671	MGP_C57BL6NJ_G0026135(Zeb2)
BP	GO:0007015	actin filament organization	3	331	0.11041	0.308362	MGP_C57BL6NJ_G0024409(Myom1),MGP_C57BL6NJ_G0028281(Ap1ar),MGP_C57BL6NJ_G0034792(Nrp1)
BP	GO:0019935	cyclic-nucleotide-mediated signaling	2	162	0.11086	0.308952	MGP_C57BL6NJ_G0021587(Ptger2),MGP_C57BL6NJ_G0021900(Adra1a)
BP	GO:1902905	positive regulation of supramolecular fiber organization	2	162	0.11086	0.308952	MGP_C57BL6NJ_G0028281(Ap1ar),MGP_C57BL6NJ_G0034792(Nrp1)
BP	GO:0003012	muscle system process	3	332	0.11115	0.309427	MGP_C57BL6NJ_G0021900(Adra1a),MGP_C57BL6NJ_G0024409(Myom1),MGP_C57BL6NJ_G0024426(Ehd3)
MF	GO:0017069	snRNA binding	1	33	0.11152	0.310099	MGP_C57BL6NJ_G0016967(Trove2)
MF	GO:0019902	phosphatase binding	2	160	0.11177	0.310099	MGP_C57BL6NJ_G0019782(Armc7),MGP_C57BL6NJ_G0021906(Ppp2r2a)
BP	GO:0009117	nucleotide metabolic process	4	524	0.11193	0.310099	MGP_C57BL6NJ_G0016617(Pid1),MGP_C57BL6NJ_G0017454(Pde7b),MGP_C57BL6NJ_G0020259(Gphn),MGP_C57BL6NJ_G0026261(Atp5g3)
BP	GO:0007160	cell-matrix adhesion	2	163	0.11199	0.310099	MGP_C57BL6NJ_G0017366(Cd34),MGP_C57BL6NJ_G0034792(Nrp1)
BP	GO:0050770	regulation of axonogenesis	2	163	0.11199	0.310099	MGP_C57BL6NJ_G0026135(Zeb2),MGP_C57BL6NJ_G0034792(Nrp1)
BP	GO:2001233	regulation of apoptotic signaling pathway	3	334	0.11264	0.310598	MGP_C57BL6NJ_G0016210(St18),MGP_C57BL6NJ_G0022517(Mkl1),MGP_C57BL6NJ_G0034792(Nrp1)
BP	GO:0001569	branching involved in blood vessel morphogenesis	1	34	0.11283	0.310598	MGP_C57BL6NJ_G0034792(Nrp1)
BP	GO:0043368	positive T cell selection	1	34	0.11283	0.310598	MGP_C57BL6NJ_G0020351(Batf)
BP	GO:0043489	RNA stabilization	1	34	0.11283	0.310598	MGP_C57BL6NJ_G0035602(Syncrip)
BP	GO:1901385	regulation of voltage-gated calcium channel activity	1	34	0.11283	0.310598	MGP_C57BL6NJ_G0024426(Ehd3)
BP	GO:0010720	positive regulation of cell development	4	526	0.11308	0.310598	MGP_C57BL6NJ_G0020849(Rreb1),MGP_C57BL6NJ_G0021322(Il6st),MGP_C57BL6NJ_G0026135(Zeb2),MGP_C57BL6NJ_G0034792(Nrp1)
BP	GO:0001666	response to hypoxia	2	164	0.11313	0.310598	MGP_C57BL6NJ_G0017366(Cd34),MGP_C57BL6NJ_G0033450(Prkcb)
BP	GO:0031345	negative regulation of cell projection organization	2	164	0.11313	0.310598	MGP_C57BL6NJ_G0022301(Asap1),MGP_C57BL6NJ_G0034792(Nrp1)
BP	GO:0034248	regulation of cellular amide metabolic process	3	335	0.11339	0.310982	MGP_C57BL6NJ_G0016986(Fam129a),MGP_C57BL6NJ_G0032858(Klhl25),MGP_C57BL6NJ_G0035602(Syncrip)
MF	GO:0005246	calcium channel regulator activity	1	34	0.1147	0.313909	MGP_C57BL6NJ_G0033450(Prkcb)
MF	GO:0051721	protein phosphatase 2A binding	1	34	0.1147	0.313909	MGP_C57BL6NJ_G0021906(Ppp2r2a)
CC	GO:0044422	organelle part	29	6945	0.1154	0.314321	MGP_C57BL6NJ_G0016429(Satb2),MGP_C57BL6NJ_G0016967(Trove2),MGP_C57BL6NJ_G0020259(Gphn),MGP_C57BL6NJ_G0020351(Batf),MGP_C57BL6NJ_G0020402(Efcab11),MGP_C57BL6NJ_G0020849(Rreb1),MGP_C57BL6NJ_G0021878(Hmbox1),MGP_C57BL6NJ_G0021900(Adra1a),MGP_C57BL6NJ_G0021924(Gm21685),MGP_C57BL6NJ_G0021963(Itm2b),MGP_C57BL6NJ_G0022290(Nsmce2),MGP_C57BL6NJ_G0022301(Asap1),MGP_C57BL6NJ_G0022517(Mkl1),MGP_C57BL6NJ_G002…
BP	GO:0006753	nucleoside phosphate metabolic process	4	530	0.11541	0.314321	MGP_C57BL6NJ_G0016617(Pid1),MGP_C57BL6NJ_G0017454(Pde7b),MGP_C57BL6NJ_G0020259(Gphn),MGP_C57BL6NJ_G0026261(Atp5g3)
BP	GO:0007431	salivary gland development	1	35	0.11595	0.314321	MGP_C57BL6NJ_G0034792(Nrp1)
BP	GO:0030866	cortical actin cytoskeleton organization	1	35	0.11595	0.314321	MGP_C57BL6NJ_G0029285(Epb41)
BP	GO:0098751	bone cell development	1	35	0.11595	0.314321	MGP_C57BL6NJ_G0035015(Fli1)
BP	GO:0099084	postsynaptic specialization organization	1	35	0.11595	0.314321	MGP_C57BL6NJ_G0020259(Gphn)
BP	GO:1902475	L-alpha-amino acid transmembrane transport	1	35	0.11595	0.314321	MGP_C57BL6NJ_G0028496(Slc7a13)
BP	GO:1902667	regulation of axon guidance	1	35	0.11595	0.314321	MGP_C57BL6NJ_G0034792(Nrp1)
BP	GO:1903523	negative regulation of blood circulation	1	35	0.11595	0.314321	MGP_C57BL6NJ_G0021900(Adra1a)
BP	GO:0007166	cell surface receptor signaling pathway	11	2112	0.11611	0.314321	MGP_C57BL6NJ_G0016210(St18),MGP_C57BL6NJ_G0016617(Pid1),MGP_C57BL6NJ_G0016967(Trove2),MGP_C57BL6NJ_G0021322(Il6st),MGP_C57BL6NJ_G0021963(Itm2b),MGP_C57BL6NJ_G0024287(Plcl2),MGP_C57BL6NJ_G0024850(Csnk1g3),MGP_C57BL6NJ_G0026135(Zeb2),MGP_C57BL6NJ_G0033002(Gab2),MGP_C57BL6NJ_G0033450(Prkcb),MGP_C57BL6NJ_G0034792(Nrp1)
MF	GO:0022804	active transmembrane transporter activity	3	333	0.11628	0.314321	MGP_C57BL6NJ_G0026261(Atp5g3),MGP_C57BL6NJ_G0028496(Slc7a13),MGP_C57BL6NJ_G0036487(Abcb7)
BP	GO:0002768	immune response-regulating cell surface receptor signaling pathway	2	167	0.11655	0.314321	MGP_C57BL6NJ_G0024287(Plcl2),MGP_C57BL6NJ_G0033450(Prkcb)
BP	GO:0010821	regulation of mitochondrion organization	2	167	0.11655	0.314321	MGP_C57BL6NJ_G0016617(Pid1),MGP_C57BL6NJ_G0030171(Cdkl2)
BP	GO:0036293	response to decreased oxygen levels	2	167	0.11655	0.314321	MGP_C57BL6NJ_G0017366(Cd34),MGP_C57BL6NJ_G0033450(Prkcb)
CC	GO:0044446	intracellular organelle part	28	6673	0.117	0.315206	MGP_C57BL6NJ_G0016429(Satb2),MGP_C57BL6NJ_G0016967(Trove2),MGP_C57BL6NJ_G0020351(Batf),MGP_C57BL6NJ_G0020402(Efcab11),MGP_C57BL6NJ_G0020849(Rreb1),MGP_C57BL6NJ_G0021878(Hmbox1),MGP_C57BL6NJ_G0021900(Adra1a),MGP_C57BL6NJ_G0021924(Gm21685),MGP_C57BL6NJ_G0021963(Itm2b),MGP_C57BL6NJ_G0022290(Nsmce2),MGP_C57BL6NJ_G0022301(Asap1),MGP_C57BL6NJ_G0022517(Mkl1),MGP_C57BL6NJ_G0024409(Myom1),MGP_C57BL6NJ_G00…
BP	GO:0045785	positive regulation of cell adhesion	3	340	0.11715	0.315282	MGP_C57BL6NJ_G0020849(Rreb1),MGP_C57BL6NJ_G0021322(Il6st),MGP_C57BL6NJ_G0034792(Nrp1)
CC	GO:0019897	extrinsic component of plasma membrane	2	171	0.1176	0.315837	MGP_C57BL6NJ_G0019782(Armc7),MGP_C57BL6NJ_G0020259(Gphn)
CC	GO:0098562	cytoplasmic side of membrane	2	171	0.1176	0.315837	MGP_C57BL6NJ_G0020259(Gphn),MGP_C57BL6NJ_G0029285(Epb41)
BP	GO:0006928	movement of cell or subcellular component	9	1640	0.11784	0.315906	MGP_C57BL6NJ_G0016429(Satb2),MGP_C57BL6NJ_G0017366(Cd34),MGP_C57BL6NJ_G0018428(Tns3),MGP_C57BL6NJ_G0020849(Rreb1),MGP_C57BL6NJ_G0021322(Il6st),MGP_C57BL6NJ_G0022517(Mkl1),MGP_C57BL6NJ_G0026135(Zeb2),MGP_C57BL6NJ_G0028281(Ap1ar),MGP_C57BL6NJ_G0034792(Nrp1)
MF	GO:0005547	phosphatidylinositol-3,4,5-trisphosphate binding	1	35	0.11787	0.315906	MGP_C57BL6NJ_G0022301(Asap1)
BP	GO:0008038	neuron recognition	1	36	0.11906	0.317339	MGP_C57BL6NJ_G0034792(Nrp1)
BP	GO:0033059	cellular pigmentation	1	36	0.11906	0.317339	MGP_C57BL6NJ_G0026135(Zeb2)
BP	GO:0042092	type 2 immune response	1	36	0.11906	0.317339	MGP_C57BL6NJ_G0020351(Batf)
BP	GO:0042181	ketone biosynthetic process	1	36	0.11906	0.317339	MGP_C57BL6NJ_G0025810(Pdss1)
BP	GO:0072523	purine-containing compound catabolic process	1	36	0.11906	0.317339	MGP_C57BL6NJ_G0017454(Pde7b)
BP	GO:0030097	hemopoiesis	5	743	0.11914	0.317339	MGP_C57BL6NJ_G0017366(Cd34),MGP_C57BL6NJ_G0020351(Batf),MGP_C57BL6NJ_G0024287(Plcl2),MGP_C57BL6NJ_G0031664(Mfap5),MGP_C57BL6NJ_G0035015(Fli1)
CC	GO:0030017	sarcomere	2	173	0.1199	0.318991	MGP_C57BL6NJ_G0021900(Adra1a),MGP_C57BL6NJ_G0024409(Myom1)
BP	GO:0010632	regulation of epithelial cell migration	2	170	0.12001	0.318991	MGP_C57BL6NJ_G0020849(Rreb1),MGP_C57BL6NJ_G0034792(Nrp1)
BP	GO:0000122	negative regulation of transcription from RNA polymerase II promoter	5	745	0.12013	0.318991	MGP_C57BL6NJ_G0016210(St18),MGP_C57BL6NJ_G0016429(Satb2),MGP_C57BL6NJ_G0020849(Rreb1),MGP_C57BL6NJ_G0021878(Hmbox1),MGP_C57BL6NJ_G0026135(Zeb2)
BP	GO:0007266	Rho protein signal transduction	2	171	0.12117	0.321089	MGP_C57BL6NJ_G0021900(Adra1a),MGP_C57BL6NJ_G0034792(Nrp1)
BP	GO:0071840	cellular component organization or biogenesis	23	5215	0.12176	0.321089	MGP_C57BL6NJ_G0016429(Satb2),MGP_C57BL6NJ_G0016617(Pid1),MGP_C57BL6NJ_G0016967(Trove2),MGP_C57BL6NJ_G0017366(Cd34),MGP_C57BL6NJ_G0020259(Gphn),MGP_C57BL6NJ_G0020402(Efcab11),MGP_C57BL6NJ_G0020849(Rreb1),MGP_C57BL6NJ_G0021878(Hmbox1),MGP_C57BL6NJ_G0022290(Nsmce2),MGP_C57BL6NJ_G0022301(Asap1),MGP_C57BL6NJ_G0022517(Mkl1),MGP_C57BL6NJ_G0024409(Myom1),MGP_C57BL6NJ_G0024426(Ehd3),MGP_C57BL6NJ_G0024539(…
BP	GO:0001941	postsynaptic membrane organization	1	37	0.12216	0.321089	MGP_C57BL6NJ_G0020259(Gphn)
BP	GO:0014046	dopamine secretion	1	37	0.12216	0.321089	MGP_C57BL6NJ_G0033450(Prkcb)
BP	GO:0014059	regulation of dopamine secretion	1	37	0.12216	0.321089	MGP_C57BL6NJ_G0033450(Prkcb)
BP	GO:0030195	negative regulation of blood coagulation	1	37	0.12216	0.321089	MGP_C57BL6NJ_G0017366(Cd34)
BP	GO:0030517	negative regulation of axon extension	1	37	0.12216	0.321089	MGP_C57BL6NJ_G0034792(Nrp1)
BP	GO:0097306	cellular response to alcohol	1	37	0.12216	0.321089	MGP_C57BL6NJ_G0021587(Ptger2)
BP	GO:1900047	negative regulation of hemostasis	1	37	0.12216	0.321089	MGP_C57BL6NJ_G0017366(Cd34)
BP	GO:1902373	negative regulation of mRNA catabolic process	1	37	0.12216	0.321089	MGP_C57BL6NJ_G0035602(Syncrip)
BP	GO:0007188	adenylate cyclase-modulating G-protein coupled receptor signaling pathway	2	172	0.12233	0.321209	MGP_C57BL6NJ_G0021587(Ptger2),MGP_C57BL6NJ_G0021900(Adra1a)
CC	GO:0031672	A band	1	38	0.1231	0.322904	MGP_C57BL6NJ_G0024409(Myom1)
BP	GO:0030324	lung development	2	173	0.12349	0.323599	MGP_C57BL6NJ_G0018428(Tns3),MGP_C57BL6NJ_G0028083(Man1a2)
BP	GO:0007167	enzyme linked receptor protein signaling pathway	5	753	0.12414	0.324422	MGP_C57BL6NJ_G0016617(Pid1),MGP_C57BL6NJ_G0021322(Il6st),MGP_C57BL6NJ_G0033002(Gab2),MGP_C57BL6NJ_G0033450(Prkcb),MGP_C57BL6NJ_G0034792(Nrp1)
MF	GO:0001105	RNA polymerase II transcription coactivator activity	1	37	0.12418	0.324422	MGP_C57BL6NJ_G0022517(Mkl1)
MF	GO:0001205	transcriptional activator activity, RNA polymerase II distal enhancer sequence-specific binding	1	37	0.12418	0.324422	MGP_C57BL6NJ_G0026135(Zeb2)
BP	GO:0043281	regulation of cysteine-type endopeptidase activity involved in apoptotic process	2	174	0.12465	0.324597	MGP_C57BL6NJ_G0016210(St18),MGP_C57BL6NJ_G0022517(Mkl1)
BP	GO:0001960	negative regulation of cytokine-mediated signaling pathway	1	38	0.12525	0.324597	MGP_C57BL6NJ_G0021322(Il6st)
BP	GO:0010517	regulation of phospholipase activity	1	38	0.12525	0.324597	MGP_C57BL6NJ_G0021900(Adra1a)
BP	GO:0032653	regulation of interleukin-10 production	1	38	0.12525	0.324597	MGP_C57BL6NJ_G0017366(Cd34)
BP	GO:0045214	sarcomere organization	1	38	0.12525	0.324597	MGP_C57BL6NJ_G0024409(Myom1)
BP	GO:0050922	negative regulation of chemotaxis	1	38	0.12525	0.324597	MGP_C57BL6NJ_G0034792(Nrp1)
BP	GO:0051972	regulation of telomerase activity	1	38	0.12525	0.324597	MGP_C57BL6NJ_G0021878(Hmbox1)
BP	GO:1901068	guanosine-containing compound metabolic process	1	38	0.12525	0.324597	MGP_C57BL6NJ_G0020259(Gphn)
BP	GO:0010562	positive regulation of phosphorus metabolic process	6	974	0.12577	0.325293	MGP_C57BL6NJ_G0016617(Pid1),MGP_C57BL6NJ_G0016986(Fam129a),MGP_C57BL6NJ_G0021322(Il6st),MGP_C57BL6NJ_G0021900(Adra1a),MGP_C57BL6NJ_G0026135(Zeb2),MGP_C57BL6NJ_G0034792(Nrp1)
BP	GO:0045937	positive regulation of phosphate metabolic process	6	974	0.12577	0.325293	MGP_C57BL6NJ_G0016617(Pid1),MGP_C57BL6NJ_G0016986(Fam129a),MGP_C57BL6NJ_G0021322(Il6st),MGP_C57BL6NJ_G0021900(Adra1a),MGP_C57BL6NJ_G0026135(Zeb2),MGP_C57BL6NJ_G0034792(Nrp1)
BP	GO:0019932	second-messenger-mediated signaling	3	352	0.12637	0.326394	MGP_C57BL6NJ_G0020402(Efcab11),MGP_C57BL6NJ_G0021587(Ptger2),MGP_C57BL6NJ_G0021900(Adra1a)
BP	GO:0016310	phosphorylation	10	1905	0.12651	0.326394	MGP_C57BL6NJ_G0016617(Pid1),MGP_C57BL6NJ_G0016986(Fam129a),MGP_C57BL6NJ_G0021322(Il6st),MGP_C57BL6NJ_G0021900(Adra1a),MGP_C57BL6NJ_G0024287(Plcl2),MGP_C57BL6NJ_G0024850(Csnk1g3),MGP_C57BL6NJ_G0026135(Zeb2),MGP_C57BL6NJ_G0030171(Cdkl2),MGP_C57BL6NJ_G0033450(Prkcb),MGP_C57BL6NJ_G0034792(Nrp1)
BP	GO:0001932	regulation of protein phosphorylation	7	1201	0.12669	0.326394	MGP_C57BL6NJ_G0016617(Pid1),MGP_C57BL6NJ_G0016986(Fam129a),MGP_C57BL6NJ_G0021322(Il6st),MGP_C57BL6NJ_G0021900(Adra1a),MGP_C57BL6NJ_G0024287(Plcl2),MGP_C57BL6NJ_G0026135(Zeb2),MGP_C57BL6NJ_G0034792(Nrp1)
CC	GO:0031301	integral component of organelle membrane	2	179	0.1267	0.326394	MGP_C57BL6NJ_G0021924(Gm21685),MGP_C57BL6NJ_G0021963(Itm2b)
BP	GO:0030323	respiratory tube development	2	176	0.12699	0.326816	MGP_C57BL6NJ_G0018428(Tns3),MGP_C57BL6NJ_G0028083(Man1a2)
BP	GO:0008217	regulation of blood pressure	2	177	0.12817	0.327659	MGP_C57BL6NJ_G0017366(Cd34),MGP_C57BL6NJ_G0021900(Adra1a)
BP	GO:0032868	response to insulin	2	177	0.12817	0.327659	MGP_C57BL6NJ_G0016617(Pid1),MGP_C57BL6NJ_G0033450(Prkcb)
BP	GO:0010559	regulation of glycoprotein biosynthetic process	1	39	0.12833	0.327659	MGP_C57BL6NJ_G0021963(Itm2b)
BP	GO:0032210	regulation of telomere maintenance via telomerase	1	39	0.12833	0.327659	MGP_C57BL6NJ_G0021878(Hmbox1)
BP	GO:0045687	positive regulation of glial cell differentiation	1	39	0.12833	0.327659	MGP_C57BL6NJ_G0021322(Il6st)
BP	GO:0045823	positive regulation of heart contraction	1	39	0.12833	0.327659	MGP_C57BL6NJ_G0021900(Adra1a)
BP	GO:0050819	negative regulation of coagulation	1	39	0.12833	0.327659	MGP_C57BL6NJ_G0017366(Cd34)
BP	GO:0051489	regulation of filopodium assembly	1	39	0.12833	0.327659	MGP_C57BL6NJ_G0034792(Nrp1)
MF	GO:0004672	protein kinase activity	4	543	0.12889	0.328721	MGP_C57BL6NJ_G0024850(Csnk1g3),MGP_C57BL6NJ_G0030171(Cdkl2),MGP_C57BL6NJ_G0033450(Prkcb),MGP_C57BL6NJ_G0034792(Nrp1)
CC	GO:0044449	contractile fiber part	2	181	0.129	0.328721	MGP_C57BL6NJ_G0021900(Adra1a),MGP_C57BL6NJ_G0024409(Myom1)
BP	GO:0070482	response to oxygen levels	2	178	0.12934	0.328991	MGP_C57BL6NJ_G0017366(Cd34),MGP_C57BL6NJ_G0033450(Prkcb)
MF	GO:0043169	cation binding	16	3353	0.12936	0.328991	MGP_C57BL6NJ_G0016210(St18),MGP_C57BL6NJ_G0016967(Trove2),MGP_C57BL6NJ_G0017454(Pde7b),MGP_C57BL6NJ_G0020259(Gphn),MGP_C57BL6NJ_G0020402(Efcab11),MGP_C57BL6NJ_G0020849(Rreb1),MGP_C57BL6NJ_G0022290(Nsmce2),MGP_C57BL6NJ_G0022301(Asap1),MGP_C57BL6NJ_G0024426(Ehd3),MGP_C57BL6NJ_G0024850(Csnk1g3),MGP_C57BL6NJ_G0026135(Zeb2),MGP_C57BL6NJ_G0028083(Man1a2),MGP_C57BL6NJ_G0031590(Mkrn2),MGP_C57BL6NJ_G00334…
MF	GO:0001540	amyloid-beta binding	1	39	0.13044	0.330966	MGP_C57BL6NJ_G0021963(Itm2b)
BP	GO:0048762	mesenchymal cell differentiation	2	179	0.13052	0.330966	MGP_C57BL6NJ_G0026135(Zeb2),MGP_C57BL6NJ_G0034792(Nrp1)
BP	GO:0060047	heart contraction	2	179	0.13052	0.330966	MGP_C57BL6NJ_G0021900(Adra1a),MGP_C57BL6NJ_G0024426(Ehd3)
BP	GO:0032206	positive regulation of telomere maintenance	1	40	0.1314	0.331897	MGP_C57BL6NJ_G0021878(Hmbox1)
BP	GO:0045907	positive regulation of vasoconstriction	1	40	0.1314	0.331897	MGP_C57BL6NJ_G0021900(Adra1a)
BP	GO:0051290	protein heterotetramerization	1	40	0.1314	0.331897	MGP_C57BL6NJ_G0025810(Pdss1)
BP	GO:1902743	regulation of lamellipodium organization	1	40	0.1314	0.331897	MGP_C57BL6NJ_G0020849(Rreb1)
BP	GO:0010608	posttranscriptional regulation of gene expression	3	359	0.13187	0.332436	MGP_C57BL6NJ_G0016986(Fam129a),MGP_C57BL6NJ_G0032858(Klhl25),MGP_C57BL6NJ_G0035602(Syncrip)
BP	GO:0031346	positive regulation of cell projection organization	3	359	0.13187	0.332436	MGP_C57BL6NJ_G0020849(Rreb1),MGP_C57BL6NJ_G0026135(Zeb2),MGP_C57BL6NJ_G0034792(Nrp1)
BP	GO:0042692	muscle cell differentiation	3	360	0.13266	0.333421	MGP_C57BL6NJ_G0021900(Adra1a),MGP_C57BL6NJ_G0022517(Mkl1),MGP_C57BL6NJ_G0024409(Myom1)
CC	GO:0043025	neuronal cell body	4	569	0.1327	0.333421	MGP_C57BL6NJ_G0020259(Gphn),MGP_C57BL6NJ_G0021322(Il6st),MGP_C57BL6NJ_G0026118(Dennd1a),MGP_C57BL6NJ_G0034792(Nrp1)
CC	GO:0098794	postsynapse	4	569	0.1327	0.333421	MGP_C57BL6NJ_G0020259(Gphn),MGP_C57BL6NJ_G0021900(Adra1a),MGP_C57BL6NJ_G0022301(Asap1),MGP_C57BL6NJ_G0029285(Epb41)
BP	GO:2001234	negative regulation of apoptotic signaling pathway	2	181	0.13289	0.333421	MGP_C57BL6NJ_G0022517(Mkl1),MGP_C57BL6NJ_G0034792(Nrp1)
BP	GO:0009725	response to hormone	4	560	0.13351	0.333421	MGP_C57BL6NJ_G0016617(Pid1),MGP_C57BL6NJ_G0021587(Ptger2),MGP_C57BL6NJ_G0021900(Adra1a),MGP_C57BL6NJ_G0033450(Prkcb)
BP	GO:0035295	tube development	4	560	0.13351	0.333421	MGP_C57BL6NJ_G0018428(Tns3),MGP_C57BL6NJ_G0026135(Zeb2),MGP_C57BL6NJ_G0028083(Man1a2),MGP_C57BL6NJ_G0034792(Nrp1)
MF	GO:0022839	ion gated channel activity	1	40	0.13355	0.333421	MGP_C57BL6NJ_G0034283(Tmem38a)
MF	GO:0030145	manganese ion binding	1	40	0.13355	0.333421	MGP_C57BL6NJ_G0034287(Large)
MF	GO:0042805	actinin binding	1	40	0.13355	0.333421	MGP_C57BL6NJ_G0024409(Myom1)
BP	GO:0016925	protein sumoylation	1	41	0.13445	0.333421	MGP_C57BL6NJ_G0022290(Nsmce2)
BP	GO:0032613	interleukin-10 production	1	41	0.13445	0.333421	MGP_C57BL6NJ_G0017366(Cd34)
BP	GO:0045010	actin nucleation	1	41	0.13445	0.333421	MGP_C57BL6NJ_G0028281(Ap1ar)
BP	GO:0045773	positive regulation of axon extension	1	41	0.13445	0.333421	MGP_C57BL6NJ_G0034792(Nrp1)
BP	GO:0051496	positive regulation of stress fiber assembly	1	41	0.13445	0.333421	MGP_C57BL6NJ_G0034792(Nrp1)
BP	GO:0060193	positive regulation of lipase activity	1	41	0.13445	0.333421	MGP_C57BL6NJ_G0021900(Adra1a)
BP	GO:0060761	negative regulation of response to cytokine stimulus	1	41	0.13445	0.333421	MGP_C57BL6NJ_G0021322(Il6st)
BP	GO:1901998	toxin transport	1	41	0.13445	0.333421	MGP_C57BL6NJ_G0034792(Nrp1)
CC	GO:0008287	protein serine/threonine phosphatase complex	1	42	0.1352	0.333947	MGP_C57BL6NJ_G0021906(Ppp2r2a)
CC	GO:0016469	proton-transporting two-sector ATPase complex	1	42	0.1352	0.333947	MGP_C57BL6NJ_G0026261(Atp5g3)
CC	GO:0030173	integral component of Golgi membrane	1	42	0.1352	0.333947	MGP_C57BL6NJ_G0021924(Gm21685)
CC	GO:1903293	phosphatase complex	1	42	0.1352	0.333947	MGP_C57BL6NJ_G0021906(Ppp2r2a)
BP	GO:0061061	muscle structure development	4	563	0.13538	0.333947	MGP_C57BL6NJ_G0021900(Adra1a),MGP_C57BL6NJ_G0022517(Mkl1),MGP_C57BL6NJ_G0024409(Myom1),MGP_C57BL6NJ_G0034287(Large)
BP	GO:0008283	cell proliferation	9	1692	0.13551	0.333947	MGP_C57BL6NJ_G0016210(St18),MGP_C57BL6NJ_G0016617(Pid1),MGP_C57BL6NJ_G0017366(Cd34),MGP_C57BL6NJ_G0018428(Tns3),MGP_C57BL6NJ_G0020849(Rreb1),MGP_C57BL6NJ_G0021322(Il6st),MGP_C57BL6NJ_G0021587(Ptger2),MGP_C57BL6NJ_G0024287(Plcl2),MGP_C57BL6NJ_G0026135(Zeb2)
BP	GO:0019538	protein metabolic process	21	4746	0.13564	0.333947	MGP_C57BL6NJ_G0016210(St18),MGP_C57BL6NJ_G0016617(Pid1),MGP_C57BL6NJ_G0016986(Fam129a),MGP_C57BL6NJ_G0020259(Gphn),MGP_C57BL6NJ_G0021322(Il6st),MGP_C57BL6NJ_G0021900(Adra1a),MGP_C57BL6NJ_G0021906(Ppp2r2a),MGP_C57BL6NJ_G0021963(Itm2b),MGP_C57BL6NJ_G0022290(Nsmce2),MGP_C57BL6NJ_G0022517(Mkl1),MGP_C57BL6NJ_G0024287(Plcl2),MGP_C57BL6NJ_G0024850(Csnk1g3),MGP_C57BL6NJ_G0026135(Zeb2),MGP_C57BL6NJ_G00280…
MF	GO:1901363	heterocyclic compound binding	22	4928	0.13606	0.333947	MGP_C57BL6NJ_G0016210(St18),MGP_C57BL6NJ_G0016429(Satb2),MGP_C57BL6NJ_G0016967(Trove2),MGP_C57BL6NJ_G0020259(Gphn),MGP_C57BL6NJ_G0020351(Batf),MGP_C57BL6NJ_G0020849(Rreb1),MGP_C57BL6NJ_G0021878(Hmbox1),MGP_C57BL6NJ_G0021963(Itm2b),MGP_C57BL6NJ_G0022517(Mkl1),MGP_C57BL6NJ_G0024426(Ehd3),MGP_C57BL6NJ_G0024539(Rab18),MGP_C57BL6NJ_G0024850(Csnk1g3),MGP_C57BL6NJ_G0026135(Zeb2),MGP_C57BL6NJ_G0027001(Ba…
BP	GO:0046034	ATP metabolic process	2	184	0.13645	0.333947	MGP_C57BL6NJ_G0016617(Pid1),MGP_C57BL6NJ_G0026261(Atp5g3)
BP	GO:0032879	regulation of localization	12	2427	0.13647	0.333947	MGP_C57BL6NJ_G0016617(Pid1),MGP_C57BL6NJ_G0017366(Cd34),MGP_C57BL6NJ_G0020849(Rreb1),MGP_C57BL6NJ_G0021322(Il6st),MGP_C57BL6NJ_G0021900(Adra1a),MGP_C57BL6NJ_G0024409(Myom1),MGP_C57BL6NJ_G0024426(Ehd3),MGP_C57BL6NJ_G0028281(Ap1ar),MGP_C57BL6NJ_G0029285(Epb41),MGP_C57BL6NJ_G0030171(Cdkl2),MGP_C57BL6NJ_G0033450(Prkcb),MGP_C57BL6NJ_G0034792(Nrp1)
CC	GO:0045202	synapse	6	1018	0.1374	0.333947	MGP_C57BL6NJ_G0020259(Gphn),MGP_C57BL6NJ_G0021900(Adra1a),MGP_C57BL6NJ_G0022301(Asap1),MGP_C57BL6NJ_G0024539(Rab18),MGP_C57BL6NJ_G0026118(Dennd1a),MGP_C57BL6NJ_G0029285(Epb41)
BP	GO:0001954	positive regulation of cell-matrix adhesion	1	42	0.1375	0.333947	MGP_C57BL6NJ_G0034792(Nrp1)
BP	GO:0007029	endoplasmic reticulum organization	1	42	0.1375	0.333947	MGP_C57BL6NJ_G0024539(Rab18)
BP	GO:0009166	nucleotide catabolic process	1	42	0.1375	0.333947	MGP_C57BL6NJ_G0017454(Pde7b)
BP	GO:0010823	negative regulation of mitochondrion organization	1	42	0.1375	0.333947	MGP_C57BL6NJ_G0016617(Pid1)
BP	GO:0030865	cortical cytoskeleton organization	1	42	0.1375	0.333947	MGP_C57BL6NJ_G0029285(Epb41)
BP	GO:0035924	cellular response to vascular endothelial growth factor stimulus	1	42	0.1375	0.333947	MGP_C57BL6NJ_G0034792(Nrp1)
BP	GO:0051893	regulation of focal adhesion assembly	1	42	0.1375	0.333947	MGP_C57BL6NJ_G0034792(Nrp1)
BP	GO:0090109	regulation of cell-substrate junction assembly	1	42	0.1375	0.333947	MGP_C57BL6NJ_G0034792(Nrp1)
BP	GO:0090303	positive regulation of wound healing	1	42	0.1375	0.333947	MGP_C57BL6NJ_G0020849(Rreb1)
BP	GO:1902369	negative regulation of RNA catabolic process	1	42	0.1375	0.333947	MGP_C57BL6NJ_G0035602(Syncrip)
BP	GO:2000300	regulation of synaptic vesicle exocytosis	1	42	0.1375	0.333947	MGP_C57BL6NJ_G0021900(Adra1a)
BP	GO:0065003	macromolecular complex assembly	8	1461	0.13778	0.334313	MGP_C57BL6NJ_G0020259(Gphn),MGP_C57BL6NJ_G0020402(Efcab11),MGP_C57BL6NJ_G0022301(Asap1),MGP_C57BL6NJ_G0024409(Myom1),MGP_C57BL6NJ_G0024426(Ehd3),MGP_C57BL6NJ_G0025810(Pdss1),MGP_C57BL6NJ_G0028281(Ap1ar),MGP_C57BL6NJ_G0029285(Epb41)
BP	GO:0044249	cellular biosynthetic process	21	4757	0.13814	0.334428	MGP_C57BL6NJ_G0016210(St18),MGP_C57BL6NJ_G0016429(Satb2),MGP_C57BL6NJ_G0016617(Pid1),MGP_C57BL6NJ_G0016986(Fam129a),MGP_C57BL6NJ_G0017366(Cd34),MGP_C57BL6NJ_G0020259(Gphn),MGP_C57BL6NJ_G0020351(Batf),MGP_C57BL6NJ_G0020849(Rreb1),MGP_C57BL6NJ_G0021878(Hmbox1),MGP_C57BL6NJ_G0021963(Itm2b),MGP_C57BL6NJ_G0022517(Mkl1),MGP_C57BL6NJ_G0025810(Pdss1),MGP_C57BL6NJ_G0026135(Zeb2),MGP_C57BL6NJ_G0026261(Atp5…
BP	GO:0003015	heart process	2	186	0.13884	0.334428	MGP_C57BL6NJ_G0021900(Adra1a),MGP_C57BL6NJ_G0024426(Ehd3)
MF	GO:0019894	kinesin binding	1	42	0.13975	0.334428	MGP_C57BL6NJ_G0028281(Ap1ar)
BP	GO:0048729	tissue morphogenesis	4	570	0.13979	0.334428	MGP_C57BL6NJ_G0020849(Rreb1),MGP_C57BL6NJ_G0024409(Myom1),MGP_C57BL6NJ_G0026135(Zeb2),MGP_C57BL6NJ_G0034792(Nrp1)
BP	GO:0006816	calcium ion transport	3	369	0.13986	0.334428	MGP_C57BL6NJ_G0021900(Adra1a),MGP_C57BL6NJ_G0024426(Ehd3),MGP_C57BL6NJ_G0033450(Prkcb)
BP	GO:0031330	negative regulation of cellular catabolic process	2	187	0.14004	0.334428	MGP_C57BL6NJ_G0021900(Adra1a),MGP_C57BL6NJ_G0035602(Syncrip)
CC	GO:0016604	nuclear body	4	581	0.1401	0.334428	MGP_C57BL6NJ_G0020849(Rreb1),MGP_C57BL6NJ_G0021878(Hmbox1),MGP_C57BL6NJ_G0022290(Nsmce2),MGP_C57BL6NJ_G0035015(Fli1)
MF	GO:0003779	actin binding	3	363	0.14017	0.334428	MGP_C57BL6NJ_G0022517(Mkl1),MGP_C57BL6NJ_G0024409(Myom1),MGP_C57BL6NJ_G0029285(Epb41)
BP	GO:0055086	nucleobase-containing small molecule metabolic process	4	571	0.14043	0.334428	MGP_C57BL6NJ_G0016617(Pid1),MGP_C57BL6NJ_G0017454(Pde7b),MGP_C57BL6NJ_G0020259(Gphn),MGP_C57BL6NJ_G0026261(Atp5g3)
BP	GO:0002042	cell migration involved in sprouting angiogenesis	1	43	0.14054	0.334428	MGP_C57BL6NJ_G0034792(Nrp1)
BP	GO:0002204	somatic recombination of immunoglobulin genes involved in immune response	1	43	0.14054	0.334428	MGP_C57BL6NJ_G0020351(Batf)
BP	GO:0002208	somatic diversification of immunoglobulins involved in immune response	1	43	0.14054	0.334428	MGP_C57BL6NJ_G0020351(Batf)
BP	GO:0021545	cranial nerve development	1	43	0.14054	0.334428	MGP_C57BL6NJ_G0034792(Nrp1)
BP	GO:0045190	isotype switching	1	43	0.14054	0.334428	MGP_C57BL6NJ_G0020351(Batf)
BP	GO:0046148	pigment biosynthetic process	1	43	0.14054	0.334428	MGP_C57BL6NJ_G0026135(Zeb2)
BP	GO:0046189	phenol-containing compound biosynthetic process	1	43	0.14054	0.334428	MGP_C57BL6NJ_G0026135(Zeb2)
BP	GO:0046580	negative regulation of Ras protein signal transduction	1	43	0.14054	0.334428	MGP_C57BL6NJ_G0021900(Adra1a)
BP	GO:0048066	developmental pigmentation	1	43	0.14054	0.334428	MGP_C57BL6NJ_G0026135(Zeb2)
BP	GO:0048488	synaptic vesicle endocytosis	1	43	0.14054	0.334428	MGP_C57BL6NJ_G0026118(Dennd1a)
BP	GO:0090329	regulation of DNA-dependent DNA replication	1	43	0.14054	0.334428	MGP_C57BL6NJ_G0016617(Pid1)
BP	GO:1903018	regulation of glycoprotein metabolic process	1	43	0.14054	0.334428	MGP_C57BL6NJ_G0021963(Itm2b)
CC	GO:0030016	myofibril	2	191	0.1407	0.334502	MGP_C57BL6NJ_G0021900(Adra1a),MGP_C57BL6NJ_G0024409(Myom1)
CC	GO:0031228	intrinsic component of Golgi membrane	1	44	0.1412	0.335382	MGP_C57BL6NJ_G0021924(Gm21685)
BP	GO:0046649	lymphocyte activation	4	573	0.1417	0.336262	MGP_C57BL6NJ_G0020351(Batf),MGP_C57BL6NJ_G0021322(Il6st),MGP_C57BL6NJ_G0024287(Plcl2),MGP_C57BL6NJ_G0033450(Prkcb)
CC	GO:0043227	membrane-bounded organelle	39	9977	0.142	0.336665	MGP_C57BL6NJ_G0016210(St18),MGP_C57BL6NJ_G0016429(Satb2),MGP_C57BL6NJ_G0016967(Trove2),MGP_C57BL6NJ_G0016986(Fam129a),MGP_C57BL6NJ_G0017366(Cd34),MGP_C57BL6NJ_G0019711(Pitpnc1),MGP_C57BL6NJ_G0019782(Armc7),MGP_C57BL6NJ_G0020351(Batf),MGP_C57BL6NJ_G0020402(Efcab11),MGP_C57BL6NJ_G0020849(Rreb1),MGP_C57BL6NJ_G0021322(Il6st),MGP_C57BL6NJ_G0021878(Hmbox1),MGP_C57BL6NJ_G0021900(Adra1a),MGP_C57BL6NJ_G00…
BP	GO:0048534	hematopoietic or lymphoid organ development	5	788	0.14243	0.336783	MGP_C57BL6NJ_G0017366(Cd34),MGP_C57BL6NJ_G0020351(Batf),MGP_C57BL6NJ_G0024287(Plcl2),MGP_C57BL6NJ_G0031664(Mfap5),MGP_C57BL6NJ_G0035015(Fli1)
BP	GO:0051495	positive regulation of cytoskeleton organization	2	189	0.14244	0.336783	MGP_C57BL6NJ_G0028281(Ap1ar),MGP_C57BL6NJ_G0034792(Nrp1)
BP	GO:0097191	extrinsic apoptotic signaling pathway	2	189	0.14244	0.336783	MGP_C57BL6NJ_G0021963(Itm2b),MGP_C57BL6NJ_G0034792(Nrp1)
MF	GO:0001786	phosphatidylserine binding	1	43	0.14283	0.337275	MGP_C57BL6NJ_G0022301(Asap1)
BP	GO:0006879	cellular iron ion homeostasis	1	44	0.14356	0.337275	MGP_C57BL6NJ_G0036487(Abcb7)
BP	GO:0007062	sister chromatid cohesion	1	44	0.14356	0.337275	MGP_C57BL6NJ_G0022290(Nsmce2)
BP	GO:0032720	negative regulation of tumor necrosis factor production	1	44	0.14356	0.337275	MGP_C57BL6NJ_G0017366(Cd34)
BP	GO:0042246	tissue regeneration	1	44	0.14356	0.337275	MGP_C57BL6NJ_G0034287(Large)
BP	GO:0045777	positive regulation of blood pressure	1	44	0.14356	0.337275	MGP_C57BL6NJ_G0021900(Adra1a)
BP	GO:0048008	platelet-derived growth factor receptor signaling pathway	1	44	0.14356	0.337275	MGP_C57BL6NJ_G0034792(Nrp1)
CC	GO:0005856	cytoskeleton	9	1748	0.1442	0.338471	MGP_C57BL6NJ_G0020259(Gphn),MGP_C57BL6NJ_G0020402(Efcab11),MGP_C57BL6NJ_G0022301(Asap1),MGP_C57BL6NJ_G0024409(Myom1),MGP_C57BL6NJ_G0029285(Epb41),MGP_C57BL6NJ_G0029745(Ccdc146),MGP_C57BL6NJ_G0030171(Cdkl2),MGP_C57BL6NJ_G0033450(Prkcb),MGP_C57BL6NJ_G0034792(Nrp1)
BP	GO:0031334	positive regulation of protein complex assembly	2	192	0.14606	0.341273	MGP_C57BL6NJ_G0022301(Asap1),MGP_C57BL6NJ_G0028281(Ap1ar)
CC	GO:0005634	nucleus	24	5706	0.1465	0.341273	MGP_C57BL6NJ_G0016210(St18),MGP_C57BL6NJ_G0016429(Satb2),MGP_C57BL6NJ_G0016967(Trove2),MGP_C57BL6NJ_G0019711(Pitpnc1),MGP_C57BL6NJ_G0019782(Armc7),MGP_C57BL6NJ_G0020351(Batf),MGP_C57BL6NJ_G0020402(Efcab11),MGP_C57BL6NJ_G0020849(Rreb1),MGP_C57BL6NJ_G0021878(Hmbox1),MGP_C57BL6NJ_G0021900(Adra1a),MGP_C57BL6NJ_G0022290(Nsmce2),MGP_C57BL6NJ_G0022517(Mkl1),MGP_C57BL6NJ_G0024850(Csnk1g3),MGP_C57BL6NJ_G0…
BP	GO:0007528	neuromuscular junction development	1	45	0.14658	0.341273	MGP_C57BL6NJ_G0020259(Gphn)
BP	GO:0007588	excretion	1	45	0.14658	0.341273	MGP_C57BL6NJ_G0021900(Adra1a)
BP	GO:0014911	positive regulation of smooth muscle cell migration	1	45	0.14658	0.341273	MGP_C57BL6NJ_G0021322(Il6st)
BP	GO:0042982	amyloid precursor protein metabolic process	1	45	0.14658	0.341273	MGP_C57BL6NJ_G0021963(Itm2b)
BP	GO:0043536	positive regulation of blood vessel endothelial cell migration	1	45	0.14658	0.341273	MGP_C57BL6NJ_G0034792(Nrp1)
BP	GO:0061337	cardiac conduction	1	45	0.14658	0.341273	MGP_C57BL6NJ_G0024426(Ehd3)
BP	GO:0098900	regulation of action potential	1	45	0.14658	0.341273	MGP_C57BL6NJ_G0021900(Adra1a)
BP	GO:0030155	regulation of cell adhesion	4	582	0.14749	0.342985	MGP_C57BL6NJ_G0020849(Rreb1),MGP_C57BL6NJ_G0021322(Il6st),MGP_C57BL6NJ_G0028281(Ap1ar),MGP_C57BL6NJ_G0034792(Nrp1)
BP	GO:0043087	regulation of GTPase activity	3	379	0.14803	0.342985	MGP_C57BL6NJ_G0022301(Asap1),MGP_C57BL6NJ_G0026118(Dennd1a),MGP_C57BL6NJ_G0034792(Nrp1)
CC	GO:0097060	synaptic membrane	3	387	0.1489	0.342985	MGP_C57BL6NJ_G0020259(Gphn),MGP_C57BL6NJ_G0021900(Adra1a),MGP_C57BL6NJ_G0026118(Dennd1a)
BP	GO:0008104	protein localization	11	2219	0.14909	0.342985	MGP_C57BL6NJ_G0016617(Pid1),MGP_C57BL6NJ_G0017366(Cd34),MGP_C57BL6NJ_G0020259(Gphn),MGP_C57BL6NJ_G0024409(Myom1),MGP_C57BL6NJ_G0024426(Ehd3),MGP_C57BL6NJ_G0024539(Rab18),MGP_C57BL6NJ_G0026118(Dennd1a),MGP_C57BL6NJ_G0028281(Ap1ar),MGP_C57BL6NJ_G0029285(Epb41),MGP_C57BL6NJ_G0030171(Cdkl2),MGP_C57BL6NJ_G0034792(Nrp1)
BP	GO:0031326	regulation of cellular biosynthetic process	16	3489	0.14938	0.342985	MGP_C57BL6NJ_G0016210(St18),MGP_C57BL6NJ_G0016429(Satb2),MGP_C57BL6NJ_G0016617(Pid1),MGP_C57BL6NJ_G0016986(Fam129a),MGP_C57BL6NJ_G0017366(Cd34),MGP_C57BL6NJ_G0020351(Batf),MGP_C57BL6NJ_G0020849(Rreb1),MGP_C57BL6NJ_G0021878(Hmbox1),MGP_C57BL6NJ_G0021963(Itm2b),MGP_C57BL6NJ_G0022517(Mkl1),MGP_C57BL6NJ_G0026135(Zeb2),MGP_C57BL6NJ_G0032858(Klhl25),MGP_C57BL6NJ_G0033450(Prkcb),MGP_C57BL6NJ_G0035015(Fl…
BP	GO:2000112	regulation of cellular macromolecule biosynthetic process	15	3231	0.1494	0.342985	MGP_C57BL6NJ_G0016210(St18),MGP_C57BL6NJ_G0016429(Satb2),MGP_C57BL6NJ_G0016617(Pid1),MGP_C57BL6NJ_G0016986(Fam129a),MGP_C57BL6NJ_G0020351(Batf),MGP_C57BL6NJ_G0020849(Rreb1),MGP_C57BL6NJ_G0021878(Hmbox1),MGP_C57BL6NJ_G0021963(Itm2b),MGP_C57BL6NJ_G0022517(Mkl1),MGP_C57BL6NJ_G0026135(Zeb2),MGP_C57BL6NJ_G0032858(Klhl25),MGP_C57BL6NJ_G0033450(Prkcb),MGP_C57BL6NJ_G0035015(Fli1),MGP_C57BL6NJ_G0035508(Rf…
BP	GO:0003044	regulation of systemic arterial blood pressure mediated by a chemical signal	1	46	0.14958	0.342985	MGP_C57BL6NJ_G0021900(Adra1a)
BP	GO:0030071	regulation of mitotic metaphase/anaphase transition	1	46	0.14958	0.342985	MGP_C57BL6NJ_G0022290(Nsmce2)
BP	GO:0030219	megakaryocyte differentiation	1	46	0.14958	0.342985	MGP_C57BL6NJ_G0035015(Fli1)
BP	GO:0042531	positive regulation of tyrosine phosphorylation of STAT protein	1	46	0.14958	0.342985	MGP_C57BL6NJ_G0021322(Il6st)
BP	GO:0045840	positive regulation of mitotic nuclear division	1	46	0.14958	0.342985	MGP_C57BL6NJ_G0022290(Nsmce2)
BP	GO:0048483	autonomic nervous system development	1	46	0.14958	0.342985	MGP_C57BL6NJ_G0034792(Nrp1)
BP	GO:0051058	negative regulation of small GTPase mediated signal transduction	1	46	0.14958	0.342985	MGP_C57BL6NJ_G0021900(Adra1a)
BP	GO:1903556	negative regulation of tumor necrosis factor superfamily cytokine production	1	46	0.14958	0.342985	MGP_C57BL6NJ_G0017366(Cd34)
BP	GO:1904356	regulation of telomere maintenance via telomere lengthening	1	46	0.14958	0.342985	MGP_C57BL6NJ_G0021878(Hmbox1)
BP	GO:0031323	regulation of cellular metabolic process	22	5074	0.14967	0.342985	MGP_C57BL6NJ_G0016210(St18),MGP_C57BL6NJ_G0016429(Satb2),MGP_C57BL6NJ_G0016617(Pid1),MGP_C57BL6NJ_G0016986(Fam129a),MGP_C57BL6NJ_G0017366(Cd34),MGP_C57BL6NJ_G0020351(Batf),MGP_C57BL6NJ_G0020849(Rreb1),MGP_C57BL6NJ_G0021322(Il6st),MGP_C57BL6NJ_G0021878(Hmbox1),MGP_C57BL6NJ_G0021900(Adra1a),MGP_C57BL6NJ_G0021906(Ppp2r2a),MGP_C57BL6NJ_G0021963(Itm2b),MGP_C57BL6NJ_G0022517(Mkl1),MGP_C57BL6NJ_G0024287…
BP	GO:0001101	response to acid chemical	2	195	0.1497	0.342985	MGP_C57BL6NJ_G0016617(Pid1),MGP_C57BL6NJ_G0021587(Ptger2)
BP	GO:0090257	regulation of muscle system process	2	195	0.1497	0.342985	MGP_C57BL6NJ_G0021900(Adra1a),MGP_C57BL6NJ_G0024426(Ehd3)
BP	GO:0009152	purine ribonucleotide biosynthetic process	2	196	0.15092	0.344865	MGP_C57BL6NJ_G0016617(Pid1),MGP_C57BL6NJ_G0026261(Atp5g3)
BP	GO:0043393	regulation of protein binding	2	196	0.15092	0.344865	MGP_C57BL6NJ_G0024287(Plcl2),MGP_C57BL6NJ_G0029285(Epb41)
BP	GO:1901215	negative regulation of neuron death	2	196	0.15092	0.344865	MGP_C57BL6NJ_G0017366(Cd34),MGP_C57BL6NJ_G0034792(Nrp1)
BP	GO:0060541	respiratory system development	2	197	0.15214	0.346214	MGP_C57BL6NJ_G0018428(Tns3),MGP_C57BL6NJ_G0028083(Man1a2)
BP	GO:0016447	somatic recombination of immunoglobulin gene segments	1	47	0.15258	0.346214	MGP_C57BL6NJ_G0020351(Batf)
BP	GO:0019748	secondary metabolic process	1	47	0.15258	0.346214	MGP_C57BL6NJ_G0026135(Zeb2)
BP	GO:0035272	exocrine system development	1	47	0.15258	0.346214	MGP_C57BL6NJ_G0034792(Nrp1)
BP	GO:0045933	positive regulation of muscle contraction	1	47	0.15258	0.346214	MGP_C57BL6NJ_G0021900(Adra1a)
BP	GO:0050710	negative regulation of cytokine secretion	1	47	0.15258	0.346214	MGP_C57BL6NJ_G0017366(Cd34)
BP	GO:0097120	receptor localization to synapse	1	47	0.15258	0.346214	MGP_C57BL6NJ_G0020259(Gphn)
BP	GO:1902099	regulation of metaphase/anaphase transition of cell cycle	1	47	0.15258	0.346214	MGP_C57BL6NJ_G0022290(Nsmce2)
BP	GO:0019222	regulation of metabolic process	23	5358	0.15314	0.34718	MGP_C57BL6NJ_G0016210(St18),MGP_C57BL6NJ_G0016429(Satb2),MGP_C57BL6NJ_G0016617(Pid1),MGP_C57BL6NJ_G0016986(Fam129a),MGP_C57BL6NJ_G0017366(Cd34),MGP_C57BL6NJ_G0020351(Batf),MGP_C57BL6NJ_G0020849(Rreb1),MGP_C57BL6NJ_G0021322(Il6st),MGP_C57BL6NJ_G0021878(Hmbox1),MGP_C57BL6NJ_G0021900(Adra1a),MGP_C57BL6NJ_G0021906(Ppp2r2a),MGP_C57BL6NJ_G0021963(Itm2b),MGP_C57BL6NJ_G0022517(Mkl1),MGP_C57BL6NJ_G0024287…
CC	GO:0005815	microtubule organizing center	4	602	0.1535	0.347243	MGP_C57BL6NJ_G0020402(Efcab11),MGP_C57BL6NJ_G0029745(Ccdc146),MGP_C57BL6NJ_G0030171(Cdkl2),MGP_C57BL6NJ_G0033450(Prkcb)
CC	GO:0098791	Golgi subcompartment	4	602	0.1535	0.347243	MGP_C57BL6NJ_G0021924(Gm21685),MGP_C57BL6NJ_G0021963(Itm2b),MGP_C57BL6NJ_G0028083(Man1a2),MGP_C57BL6NJ_G0034287(Large)
BP	GO:0051240	positive regulation of multicellular organismal process	8	1501	0.15357	0.347243	MGP_C57BL6NJ_G0017366(Cd34),MGP_C57BL6NJ_G0020849(Rreb1),MGP_C57BL6NJ_G0021322(Il6st),MGP_C57BL6NJ_G0021587(Ptger2),MGP_C57BL6NJ_G0021900(Adra1a),MGP_C57BL6NJ_G0026135(Zeb2),MGP_C57BL6NJ_G0033450(Prkcb),MGP_C57BL6NJ_G0034792(Nrp1)
CC	GO:0043292	contractile fiber	2	202	0.1538	0.347459	MGP_C57BL6NJ_G0021900(Adra1a),MGP_C57BL6NJ_G0024409(Myom1)
MF	GO:0097159	organic cyclic compound binding	22	5008	0.15491	0.348395	MGP_C57BL6NJ_G0016210(St18),MGP_C57BL6NJ_G0016429(Satb2),MGP_C57BL6NJ_G0016967(Trove2),MGP_C57BL6NJ_G0020259(Gphn),MGP_C57BL6NJ_G0020351(Batf),MGP_C57BL6NJ_G0020849(Rreb1),MGP_C57BL6NJ_G0021878(Hmbox1),MGP_C57BL6NJ_G0021963(Itm2b),MGP_C57BL6NJ_G0022517(Mkl1),MGP_C57BL6NJ_G0024426(Ehd3),MGP_C57BL6NJ_G0024539(Rab18),MGP_C57BL6NJ_G0024850(Csnk1g3),MGP_C57BL6NJ_G0026135(Zeb2),MGP_C57BL6NJ_G0027001(Ba…
MF	GO:1901681	sulfur compound binding	2	196	0.15513	0.348395	MGP_C57BL6NJ_G0017366(Cd34),MGP_C57BL6NJ_G0034792(Nrp1)
BP	GO:0051656	establishment of organelle localization	3	388	0.1555	0.348395	MGP_C57BL6NJ_G0021900(Adra1a),MGP_C57BL6NJ_G0026118(Dennd1a),MGP_C57BL6NJ_G0028281(Ap1ar)
BP	GO:0007091	metaphase/anaphase transition of mitotic cell cycle	1	48	0.15556	0.348395	MGP_C57BL6NJ_G0022290(Nsmce2)
BP	GO:0021795	cerebral cortex cell migration	1	48	0.15556	0.348395	MGP_C57BL6NJ_G0034792(Nrp1)
BP	GO:0045980	negative regulation of nucleotide metabolic process	1	48	0.15556	0.348395	MGP_C57BL6NJ_G0016617(Pid1)
BP	GO:0046847	filopodium assembly	1	48	0.15556	0.348395	MGP_C57BL6NJ_G0034792(Nrp1)
BP	GO:0061098	positive regulation of protein tyrosine kinase activity	1	48	0.15556	0.348395	MGP_C57BL6NJ_G0021900(Adra1a)
BP	GO:1900543	negative regulation of purine nucleotide metabolic process	1	48	0.15556	0.348395	MGP_C57BL6NJ_G0016617(Pid1)
BP	GO:1903391	regulation of adherens junction organization	1	48	0.15556	0.348395	MGP_C57BL6NJ_G0034792(Nrp1)
BP	GO:0007187	G-protein coupled receptor signaling pathway, coupled to cyclic nucleotide second messenger	2	200	0.15581	0.348554	MGP_C57BL6NJ_G0021587(Ptger2),MGP_C57BL6NJ_G0021900(Adra1a)
CC	GO:0045171	intercellular bridge	1	49	0.1559	0.348554	MGP_C57BL6NJ_G0017366(Cd34)
CC	GO:0031300	intrinsic component of organelle membrane	2	204	0.1562	0.348622	MGP_C57BL6NJ_G0021924(Gm21685),MGP_C57BL6NJ_G0021963(Itm2b)
CC	GO:0015629	actin cytoskeleton	3	396	0.1562	0.348622	MGP_C57BL6NJ_G0022301(Asap1),MGP_C57BL6NJ_G0024409(Myom1),MGP_C57BL6NJ_G0029285(Epb41)
BP	GO:0051129	negative regulation of cellular component organization	4	596	0.15668	0.349273	MGP_C57BL6NJ_G0016617(Pid1),MGP_C57BL6NJ_G0022301(Asap1),MGP_C57BL6NJ_G0028281(Ap1ar),MGP_C57BL6NJ_G0034792(Nrp1)
BP	GO:0071375	cellular response to peptide hormone stimulus	2	201	0.15704	0.349273	MGP_C57BL6NJ_G0016617(Pid1),MGP_C57BL6NJ_G0033450(Prkcb)
BP	GO:0120036	plasma membrane bounded cell projection organization	7	1273	0.15725	0.349273	MGP_C57BL6NJ_G0016967(Trove2),MGP_C57BL6NJ_G0020849(Rreb1),MGP_C57BL6NJ_G0022301(Asap1),MGP_C57BL6NJ_G0022517(Mkl1),MGP_C57BL6NJ_G0024426(Ehd3),MGP_C57BL6NJ_G0026135(Zeb2),MGP_C57BL6NJ_G0034792(Nrp1)
CC	GO:0016323	basolateral plasma membrane	2	205	0.1574	0.349273	MGP_C57BL6NJ_G0017366(Cd34),MGP_C57BL6NJ_G0024539(Rab18)
BP	GO:0044260	cellular macromolecule metabolic process	29	7021	0.15745	0.349273	MGP_C57BL6NJ_G0016210(St18),MGP_C57BL6NJ_G0016429(Satb2),MGP_C57BL6NJ_G0016617(Pid1),MGP_C57BL6NJ_G0016986(Fam129a),MGP_C57BL6NJ_G0020259(Gphn),MGP_C57BL6NJ_G0020351(Batf),MGP_C57BL6NJ_G0020849(Rreb1),MGP_C57BL6NJ_G0021322(Il6st),MGP_C57BL6NJ_G0021878(Hmbox1),MGP_C57BL6NJ_G0021900(Adra1a),MGP_C57BL6NJ_G0021906(Ppp2r2a),MGP_C57BL6NJ_G0021963(Itm2b),MGP_C57BL6NJ_G0022290(Nsmce2),MGP_C57BL6NJ_G00225…
MF	GO:0004674	protein serine/threonine kinase activity	3	384	0.15781	0.349273	MGP_C57BL6NJ_G0024850(Csnk1g3),MGP_C57BL6NJ_G0030171(Cdkl2),MGP_C57BL6NJ_G0033450(Prkcb)
BP	GO:0032990	cell part morphogenesis	4	598	0.15801	0.349273	MGP_C57BL6NJ_G0016617(Pid1),MGP_C57BL6NJ_G0020849(Rreb1),MGP_C57BL6NJ_G0026135(Zeb2),MGP_C57BL6NJ_G0034792(Nrp1)
MF	GO:0030374	ligand-dependent nuclear receptor transcription coactivator activity	1	48	0.15807	0.349273	MGP_C57BL6NJ_G0033450(Prkcb)
BP	GO:0006446	regulation of translational initiation	1	49	0.15853	0.349273	MGP_C57BL6NJ_G0032858(Klhl25)
BP	GO:0007004	telomere maintenance via telomerase	1	49	0.15853	0.349273	MGP_C57BL6NJ_G0021878(Hmbox1)
BP	GO:0010812	negative regulation of cell-substrate adhesion	1	49	0.15853	0.349273	MGP_C57BL6NJ_G0028281(Ap1ar)
BP	GO:0010965	regulation of mitotic sister chromatid separation	1	49	0.15853	0.349273	MGP_C57BL6NJ_G0022290(Nsmce2)
BP	GO:0032663	regulation of interleukin-2 production	1	49	0.15853	0.349273	MGP_C57BL6NJ_G0017366(Cd34)
BP	GO:0044784	metaphase/anaphase transition of cell cycle	1	49	0.15853	0.349273	MGP_C57BL6NJ_G0022290(Nsmce2)
BP	GO:0071822	protein complex subunit organization	7	1276	0.1586	0.349273	MGP_C57BL6NJ_G0020259(Gphn),MGP_C57BL6NJ_G0020402(Efcab11),MGP_C57BL6NJ_G0022301(Asap1),MGP_C57BL6NJ_G0024409(Myom1),MGP_C57BL6NJ_G0024426(Ehd3),MGP_C57BL6NJ_G0025810(Pdss1),MGP_C57BL6NJ_G0028281(Ap1ar)
CC	GO:0060170	ciliary membrane	1	50	0.1588	0.349273	MGP_C57BL6NJ_G0024426(Ehd3)
CC	GO:0098982	GABA-ergic synapse	1	50	0.1588	0.349273	MGP_C57BL6NJ_G0021900(Adra1a)
BP	GO:0051171	regulation of nitrogen compound metabolic process	21	4844	0.15892	0.349273	MGP_C57BL6NJ_G0016210(St18),MGP_C57BL6NJ_G0016429(Satb2),MGP_C57BL6NJ_G0016617(Pid1),MGP_C57BL6NJ_G0016986(Fam129a),MGP_C57BL6NJ_G0017366(Cd34),MGP_C57BL6NJ_G0020351(Batf),MGP_C57BL6NJ_G0020849(Rreb1),MGP_C57BL6NJ_G0021322(Il6st),MGP_C57BL6NJ_G0021878(Hmbox1),MGP_C57BL6NJ_G0021900(Adra1a),MGP_C57BL6NJ_G0021906(Ppp2r2a),MGP_C57BL6NJ_G0021963(Itm2b),MGP_C57BL6NJ_G0022517(Mkl1),MGP_C57BL6NJ_G0024287…
BP	GO:0045934	negative regulation of nucleobase-containing compound metabolic process	7	1278	0.1595	0.349441	MGP_C57BL6NJ_G0016210(St18),MGP_C57BL6NJ_G0016429(Satb2),MGP_C57BL6NJ_G0016617(Pid1),MGP_C57BL6NJ_G0020849(Rreb1),MGP_C57BL6NJ_G0021878(Hmbox1),MGP_C57BL6NJ_G0026135(Zeb2),MGP_C57BL6NJ_G0035602(Syncrip)
BP	GO:2000116	regulation of cysteine-type endopeptidase activity	2	203	0.1595	0.349441	MGP_C57BL6NJ_G0016210(St18),MGP_C57BL6NJ_G0022517(Mkl1)
CC	GO:0005654	nucleoplasm	11	2292	0.1596	0.349441	MGP_C57BL6NJ_G0016429(Satb2),MGP_C57BL6NJ_G0016967(Trove2),MGP_C57BL6NJ_G0020351(Batf),MGP_C57BL6NJ_G0020849(Rreb1),MGP_C57BL6NJ_G0021878(Hmbox1),MGP_C57BL6NJ_G0022290(Nsmce2),MGP_C57BL6NJ_G0022517(Mkl1),MGP_C57BL6NJ_G0026118(Dennd1a),MGP_C57BL6NJ_G0033450(Prkcb),MGP_C57BL6NJ_G0035015(Fli1),MGP_C57BL6NJ_G0035602(Syncrip)
BP	GO:0019220	regulation of phosphate metabolic process	8	1516	0.15972	0.349441	MGP_C57BL6NJ_G0016617(Pid1),MGP_C57BL6NJ_G0016986(Fam129a),MGP_C57BL6NJ_G0021322(Il6st),MGP_C57BL6NJ_G0021900(Adra1a),MGP_C57BL6NJ_G0021906(Ppp2r2a),MGP_C57BL6NJ_G0024287(Plcl2),MGP_C57BL6NJ_G0026135(Zeb2),MGP_C57BL6NJ_G0034792(Nrp1)
BP	GO:0120035	regulation of plasma membrane bounded cell projection organization	4	601	0.16001	0.349441	MGP_C57BL6NJ_G0020849(Rreb1),MGP_C57BL6NJ_G0022301(Asap1),MGP_C57BL6NJ_G0026135(Zeb2),MGP_C57BL6NJ_G0034792(Nrp1)
BP	GO:0065009	regulation of molecular function	13	2757	0.16051	0.349441	MGP_C57BL6NJ_G0016210(St18),MGP_C57BL6NJ_G0021878(Hmbox1),MGP_C57BL6NJ_G0021900(Adra1a),MGP_C57BL6NJ_G0021906(Ppp2r2a),MGP_C57BL6NJ_G0022301(Asap1),MGP_C57BL6NJ_G0022517(Mkl1),MGP_C57BL6NJ_G0024287(Plcl2),MGP_C57BL6NJ_G0024426(Ehd3),MGP_C57BL6NJ_G0026118(Dennd1a),MGP_C57BL6NJ_G0026135(Zeb2),MGP_C57BL6NJ_G0029285(Epb41),MGP_C57BL6NJ_G0033450(Prkcb),MGP_C57BL6NJ_G0034792(Nrp1)
BP	GO:0006164	purine nucleotide biosynthetic process	2	204	0.16074	0.349441	MGP_C57BL6NJ_G0016617(Pid1),MGP_C57BL6NJ_G0026261(Atp5g3)
MF	GO:0005080	protein kinase C binding	1	49	0.16109	0.349441	MGP_C57BL6NJ_G0033450(Prkcb)
BP	GO:0034613	cellular protein localization	8	1520	0.16138	0.349441	MGP_C57BL6NJ_G0016617(Pid1),MGP_C57BL6NJ_G0020259(Gphn),MGP_C57BL6NJ_G0024426(Ehd3),MGP_C57BL6NJ_G0024539(Rab18),MGP_C57BL6NJ_G0028281(Ap1ar),MGP_C57BL6NJ_G0029285(Epb41),MGP_C57BL6NJ_G0030171(Cdkl2),MGP_C57BL6NJ_G0034792(Nrp1)
BP	GO:0002011	morphogenesis of an epithelial sheet	1	50	0.1615	0.349441	MGP_C57BL6NJ_G0020849(Rreb1)
BP	GO:0002381	immunoglobulin production involved in immunoglobulin mediated immune response	1	50	0.1615	0.349441	MGP_C57BL6NJ_G0020351(Batf)
BP	GO:0006278	RNA-dependent DNA biosynthetic process	1	50	0.1615	0.349441	MGP_C57BL6NJ_G0021878(Hmbox1)
BP	GO:0032233	positive regulation of actin filament bundle assembly	1	50	0.1615	0.349441	MGP_C57BL6NJ_G0034792(Nrp1)
BP	GO:0045058	T cell selection	1	50	0.1615	0.349441	MGP_C57BL6NJ_G0020351(Batf)
BP	GO:1904377	positive regulation of protein localization to cell periphery	1	50	0.1615	0.349441	MGP_C57BL6NJ_G0029285(Epb41)
BP	GO:0051174	regulation of phosphorus metabolic process	8	1521	0.16179	0.349441	MGP_C57BL6NJ_G0016617(Pid1),MGP_C57BL6NJ_G0016986(Fam129a),MGP_C57BL6NJ_G0021322(Il6st),MGP_C57BL6NJ_G0021900(Adra1a),MGP_C57BL6NJ_G0021906(Ppp2r2a),MGP_C57BL6NJ_G0024287(Plcl2),MGP_C57BL6NJ_G0026135(Zeb2),MGP_C57BL6NJ_G0034792(Nrp1)
BP	GO:0033036	macromolecule localization	12	2509	0.16223	0.349441	MGP_C57BL6NJ_G0016617(Pid1),MGP_C57BL6NJ_G0017366(Cd34),MGP_C57BL6NJ_G0019711(Pitpnc1),MGP_C57BL6NJ_G0020259(Gphn),MGP_C57BL6NJ_G0024409(Myom1),MGP_C57BL6NJ_G0024426(Ehd3),MGP_C57BL6NJ_G0024539(Rab18),MGP_C57BL6NJ_G0026118(Dennd1a),MGP_C57BL6NJ_G0028281(Ap1ar),MGP_C57BL6NJ_G0029285(Epb41),MGP_C57BL6NJ_G0030171(Cdkl2),MGP_C57BL6NJ_G0034792(Nrp1)
MF	GO:0005524	ATP binding	7	1263	0.16274	0.349441	MGP_C57BL6NJ_G0020259(Gphn),MGP_C57BL6NJ_G0021963(Itm2b),MGP_C57BL6NJ_G0024426(Ehd3),MGP_C57BL6NJ_G0024850(Csnk1g3),MGP_C57BL6NJ_G0030171(Cdkl2),MGP_C57BL6NJ_G0033450(Prkcb),MGP_C57BL6NJ_G0036487(Abcb7)
BP	GO:0042391	regulation of membrane potential	3	397	0.1631	0.349441	MGP_C57BL6NJ_G0016617(Pid1),MGP_C57BL6NJ_G0021900(Adra1a),MGP_C57BL6NJ_G0024426(Ehd3)
BP	GO:0009260	ribonucleotide biosynthetic process	2	206	0.16321	0.349441	MGP_C57BL6NJ_G0016617(Pid1),MGP_C57BL6NJ_G0026261(Atp5g3)
BP	GO:0072659	protein localization to plasma membrane	2	206	0.16321	0.349441	MGP_C57BL6NJ_G0016617(Pid1),MGP_C57BL6NJ_G0024426(Ehd3)
BP	GO:0110053	regulation of actin filament organization	2	206	0.16321	0.349441	MGP_C57BL6NJ_G0028281(Ap1ar),MGP_C57BL6NJ_G0034792(Nrp1)
MF	GO:0016763	transferase activity, transferring pentosyl groups	1	50	0.1641	0.349441	MGP_C57BL6NJ_G0034287(Large)
BP	GO:0001934	positive regulation of protein phosphorylation	5	827	0.16414	0.349441	MGP_C57BL6NJ_G0016986(Fam129a),MGP_C57BL6NJ_G0021322(Il6st),MGP_C57BL6NJ_G0021900(Adra1a),MGP_C57BL6NJ_G0026135(Zeb2),MGP_C57BL6NJ_G0034792(Nrp1)
BP	GO:0009889	regulation of biosynthetic process	16	3542	0.16414	0.349441	MGP_C57BL6NJ_G0016210(St18),MGP_C57BL6NJ_G0016429(Satb2),MGP_C57BL6NJ_G0016617(Pid1),MGP_C57BL6NJ_G0016986(Fam129a),MGP_C57BL6NJ_G0017366(Cd34),MGP_C57BL6NJ_G0020351(Batf),MGP_C57BL6NJ_G0020849(Rreb1),MGP_C57BL6NJ_G0021878(Hmbox1),MGP_C57BL6NJ_G0021963(Itm2b),MGP_C57BL6NJ_G0022517(Mkl1),MGP_C57BL6NJ_G0026135(Zeb2),MGP_C57BL6NJ_G0032858(Klhl25),MGP_C57BL6NJ_G0033450(Prkcb),MGP_C57BL6NJ_G0035015(Fl…
BP	GO:0048738	cardiac muscle tissue development	2	207	0.16445	0.349441	MGP_C57BL6NJ_G0021900(Adra1a),MGP_C57BL6NJ_G0024409(Myom1)
BP	GO:0070374	positive regulation of ERK1 and ERK2 cascade	2	207	0.16445	0.349441	MGP_C57BL6NJ_G0021900(Adra1a),MGP_C57BL6NJ_G0034792(Nrp1)
BP	GO:0072522	purine-containing compound biosynthetic process	2	207	0.16445	0.349441	MGP_C57BL6NJ_G0016617(Pid1),MGP_C57BL6NJ_G0026261(Atp5g3)
BP	GO:0015872	dopamine transport	1	51	0.16445	0.349441	MGP_C57BL6NJ_G0033450(Prkcb)
BP	GO:0016445	somatic diversification of immunoglobulins	1	51	0.16445	0.349441	MGP_C57BL6NJ_G0020351(Batf)
BP	GO:0034605	cellular response to heat	1	51	0.16445	0.349441	MGP_C57BL6NJ_G0017366(Cd34)
BP	GO:0043113	receptor clustering	1	51	0.16445	0.349441	MGP_C57BL6NJ_G0020259(Gphn)
BP	GO:0043954	cellular component maintenance	1	51	0.16445	0.349441	MGP_C57BL6NJ_G0020259(Gphn)
BP	GO:0045428	regulation of nitric oxide biosynthetic process	1	51	0.16445	0.349441	MGP_C57BL6NJ_G0017366(Cd34)
BP	GO:0045776	negative regulation of blood pressure	1	51	0.16445	0.349441	MGP_C57BL6NJ_G0021900(Adra1a)
BP	GO:0050918	positive chemotaxis	1	51	0.16445	0.349441	MGP_C57BL6NJ_G0034792(Nrp1)
BP	GO:1901292	nucleoside phosphate catabolic process	1	51	0.16445	0.349441	MGP_C57BL6NJ_G0017454(Pde7b)
BP	GO:1903670	regulation of sprouting angiogenesis	1	51	0.16445	0.349441	MGP_C57BL6NJ_G0034792(Nrp1)
CC	GO:0030054	cell junction	6	1075	0.1646	0.349441	MGP_C57BL6NJ_G0018428(Tns3),MGP_C57BL6NJ_G0020259(Gphn),MGP_C57BL6NJ_G0024426(Ehd3),MGP_C57BL6NJ_G0026118(Dennd1a),MGP_C57BL6NJ_G0029285(Epb41),MGP_C57BL6NJ_G0034792(Nrp1)
CC	GO:0000118	histone deacetylase complex	1	52	0.1647	0.349441	MGP_C57BL6NJ_G0016429(Satb2)
CC	GO:0030315	T-tubule	1	52	0.1647	0.349441	MGP_C57BL6NJ_G0021900(Adra1a)
BP	GO:0031344	regulation of cell projection organization	4	608	0.16472	0.349441	MGP_C57BL6NJ_G0020849(Rreb1),MGP_C57BL6NJ_G0022301(Asap1),MGP_C57BL6NJ_G0026135(Zeb2),MGP_C57BL6NJ_G0034792(Nrp1)
BP	GO:0009611	response to wounding	3	399	0.1648	0.349441	MGP_C57BL6NJ_G0017366(Cd34),MGP_C57BL6NJ_G0020849(Rreb1),MGP_C57BL6NJ_G0034287(Large)
BP	GO:0021537	telencephalon development	2	208	0.16569	0.35104	MGP_C57BL6NJ_G0026135(Zeb2),MGP_C57BL6NJ_G0034792(Nrp1)
BP	GO:0031399	regulation of protein modification process	8	1531	0.16598	0.351367	MGP_C57BL6NJ_G0016617(Pid1),MGP_C57BL6NJ_G0016986(Fam129a),MGP_C57BL6NJ_G0021322(Il6st),MGP_C57BL6NJ_G0021900(Adra1a),MGP_C57BL6NJ_G0021906(Ppp2r2a),MGP_C57BL6NJ_G0024287(Plcl2),MGP_C57BL6NJ_G0026135(Zeb2),MGP_C57BL6NJ_G0034792(Nrp1)
BP	GO:0070727	cellular macromolecule localization	8	1532	0.16641	0.35199	MGP_C57BL6NJ_G0016617(Pid1),MGP_C57BL6NJ_G0020259(Gphn),MGP_C57BL6NJ_G0024426(Ehd3),MGP_C57BL6NJ_G0024539(Rab18),MGP_C57BL6NJ_G0028281(Ap1ar),MGP_C57BL6NJ_G0029285(Epb41),MGP_C57BL6NJ_G0030171(Cdkl2),MGP_C57BL6NJ_G0034792(Nrp1)
BP	GO:0007585	respiratory gaseous exchange	1	52	0.16739	0.352441	MGP_C57BL6NJ_G0028083(Man1a2)
BP	GO:0010611	regulation of cardiac muscle hypertrophy	1	52	0.16739	0.352441	MGP_C57BL6NJ_G0021900(Adra1a)
BP	GO:0051306	mitotic sister chromatid separation	1	52	0.16739	0.352441	MGP_C57BL6NJ_G0022290(Nsmce2)
BP	GO:0061045	negative regulation of wound healing	1	52	0.16739	0.352441	MGP_C57BL6NJ_G0017366(Cd34)
BP	GO:2000573	positive regulation of DNA biosynthetic process	1	52	0.16739	0.352441	MGP_C57BL6NJ_G0021878(Hmbox1)
BP	GO:0048589	developmental growth	4	612	0.16744	0.352441	MGP_C57BL6NJ_G0021900(Adra1a),MGP_C57BL6NJ_G0026135(Zeb2),MGP_C57BL6NJ_G0034287(Large),MGP_C57BL6NJ_G0034792(Nrp1)
CC	GO:0044428	nuclear part	15	3356	0.1678	0.352857	MGP_C57BL6NJ_G0016429(Satb2),MGP_C57BL6NJ_G0016967(Trove2),MGP_C57BL6NJ_G0020351(Batf),MGP_C57BL6NJ_G0020402(Efcab11),MGP_C57BL6NJ_G0020849(Rreb1),MGP_C57BL6NJ_G0021878(Hmbox1),MGP_C57BL6NJ_G0021900(Adra1a),MGP_C57BL6NJ_G0022290(Nsmce2),MGP_C57BL6NJ_G0022517(Mkl1),MGP_C57BL6NJ_G0026118(Dennd1a),MGP_C57BL6NJ_G0026135(Zeb2),MGP_C57BL6NJ_G0033450(Prkcb),MGP_C57BL6NJ_G0034283(Tmem38a),MGP_C57BL6NJ_G0…
BP	GO:0042325	regulation of phosphorylation	7	1297	0.16816	0.352857	MGP_C57BL6NJ_G0016617(Pid1),MGP_C57BL6NJ_G0016986(Fam129a),MGP_C57BL6NJ_G0021322(Il6st),MGP_C57BL6NJ_G0021900(Adra1a),MGP_C57BL6NJ_G0024287(Plcl2),MGP_C57BL6NJ_G0026135(Zeb2),MGP_C57BL6NJ_G0034792(Nrp1)
BP	GO:0045665	negative regulation of neuron differentiation	2	210	0.16817	0.352857	MGP_C57BL6NJ_G0022301(Asap1),MGP_C57BL6NJ_G0034792(Nrp1)
BP	GO:0048519	negative regulation of biological process	19	4348	0.16863	0.352857	MGP_C57BL6NJ_G0016210(St18),MGP_C57BL6NJ_G0016429(Satb2),MGP_C57BL6NJ_G0016617(Pid1),MGP_C57BL6NJ_G0016986(Fam129a),MGP_C57BL6NJ_G0017366(Cd34),MGP_C57BL6NJ_G0020849(Rreb1),MGP_C57BL6NJ_G0021322(Il6st),MGP_C57BL6NJ_G0021878(Hmbox1),MGP_C57BL6NJ_G0021900(Adra1a),MGP_C57BL6NJ_G0021963(Itm2b),MGP_C57BL6NJ_G0022301(Asap1),MGP_C57BL6NJ_G0022517(Mkl1),MGP_C57BL6NJ_G0024287(Plcl2),MGP_C57BL6NJ_G0026135(…
BP	GO:0002366	leukocyte activation involved in immune response	2	211	0.16942	0.352857	MGP_C57BL6NJ_G0020351(Batf),MGP_C57BL6NJ_G0024287(Plcl2)
BP	GO:0046390	ribose phosphate biosynthetic process	2	211	0.16942	0.352857	MGP_C57BL6NJ_G0016617(Pid1),MGP_C57BL6NJ_G0026261(Atp5g3)
BP	GO:0009967	positive regulation of signal transduction	7	1301	0.17001	0.352857	MGP_C57BL6NJ_G0016210(St18),MGP_C57BL6NJ_G0021322(Il6st),MGP_C57BL6NJ_G0021900(Adra1a),MGP_C57BL6NJ_G0024850(Csnk1g3),MGP_C57BL6NJ_G0026135(Zeb2),MGP_C57BL6NJ_G0033450(Prkcb),MGP_C57BL6NJ_G0034792(Nrp1)
MF	GO:0015179	L-amino acid transmembrane transporter activity	1	52	0.17008	0.352857	MGP_C57BL6NJ_G0028496(Slc7a13)
BP	GO:0030330	DNA damage response, signal transduction by p53 class mediator	1	53	0.17033	0.352857	MGP_C57BL6NJ_G0020351(Batf)
BP	GO:0030858	positive regulation of epithelial cell differentiation	1	53	0.17033	0.352857	MGP_C57BL6NJ_G0026135(Zeb2)
BP	GO:0032507	maintenance of protein location in cell	1	53	0.17033	0.352857	MGP_C57BL6NJ_G0029285(Epb41)
BP	GO:0036465	synaptic vesicle recycling	1	53	0.17033	0.352857	MGP_C57BL6NJ_G0026118(Dennd1a)
BP	GO:0042440	pigment metabolic process	1	53	0.17033	0.352857	MGP_C57BL6NJ_G0026135(Zeb2)
BP	GO:0090398	cellular senescence	1	53	0.17033	0.352857	MGP_C57BL6NJ_G0022290(Nsmce2)
BP	GO:0099072	regulation of postsynaptic membrane neurotransmitter receptor levels	1	53	0.17033	0.352857	MGP_C57BL6NJ_G0020259(Gphn)
BP	GO:0099132	ATP hydrolysis coupled cation transmembrane transport	1	53	0.17033	0.352857	MGP_C57BL6NJ_G0026261(Atp5g3)
BP	GO:1905818	regulation of chromosome separation	1	53	0.17033	0.352857	MGP_C57BL6NJ_G0022290(Nsmce2)
BP	GO:2000378	negative regulation of reactive oxygen species metabolic process	1	53	0.17033	0.352857	MGP_C57BL6NJ_G0017366(Cd34)
CC	GO:0016529	sarcoplasmic reticulum	1	54	0.1704	0.352857	MGP_C57BL6NJ_G0034283(Tmem38a)
BP	GO:0048584	positive regulation of response to stimulus	9	1785	0.17046	0.352857	MGP_C57BL6NJ_G0016210(St18),MGP_C57BL6NJ_G0020849(Rreb1),MGP_C57BL6NJ_G0021322(Il6st),MGP_C57BL6NJ_G0021900(Adra1a),MGP_C57BL6NJ_G0024287(Plcl2),MGP_C57BL6NJ_G0024850(Csnk1g3),MGP_C57BL6NJ_G0026135(Zeb2),MGP_C57BL6NJ_G0033450(Prkcb),MGP_C57BL6NJ_G0034792(Nrp1)
BP	GO:0010468	regulation of gene expression	16	3564	0.1705	0.352857	MGP_C57BL6NJ_G0016210(St18),MGP_C57BL6NJ_G0016429(Satb2),MGP_C57BL6NJ_G0016617(Pid1),MGP_C57BL6NJ_G0016986(Fam129a),MGP_C57BL6NJ_G0017366(Cd34),MGP_C57BL6NJ_G0020351(Batf),MGP_C57BL6NJ_G0020849(Rreb1),MGP_C57BL6NJ_G0021878(Hmbox1),MGP_C57BL6NJ_G0022517(Mkl1),MGP_C57BL6NJ_G0024409(Myom1),MGP_C57BL6NJ_G0026135(Zeb2),MGP_C57BL6NJ_G0032858(Klhl25),MGP_C57BL6NJ_G0033450(Prkcb),MGP_C57BL6NJ_G0035015(Fl…
BP	GO:0030030	cell projection organization	7	1303	0.17094	0.353485	MGP_C57BL6NJ_G0016967(Trove2),MGP_C57BL6NJ_G0020849(Rreb1),MGP_C57BL6NJ_G0022301(Asap1),MGP_C57BL6NJ_G0022517(Mkl1),MGP_C57BL6NJ_G0024426(Ehd3),MGP_C57BL6NJ_G0026135(Zeb2),MGP_C57BL6NJ_G0034792(Nrp1)
BP	GO:0002263	cell activation involved in immune response	2	214	0.17317	0.355988	MGP_C57BL6NJ_G0020351(Batf),MGP_C57BL6NJ_G0024287(Plcl2)
BP	GO:0006493	protein O-linked glycosylation	1	54	0.17325	0.355988	MGP_C57BL6NJ_G0034287(Large)
BP	GO:0014743	regulation of muscle hypertrophy	1	54	0.17325	0.355988	MGP_C57BL6NJ_G0021900(Adra1a)
BP	GO:0060191	regulation of lipase activity	1	54	0.17325	0.355988	MGP_C57BL6NJ_G0021900(Adra1a)
BP	GO:0090662	ATP hydrolysis coupled transmembrane transport	1	54	0.17325	0.355988	MGP_C57BL6NJ_G0026261(Atp5g3)
BP	GO:0099131	ATP hydrolysis coupled ion transmembrane transport	1	54	0.17325	0.355988	MGP_C57BL6NJ_G0026261(Atp5g3)
BP	GO:1901655	cellular response to ketone	1	54	0.17325	0.355988	MGP_C57BL6NJ_G0021587(Ptger2)
BP	GO:1903036	positive regulation of response to wounding	1	54	0.17325	0.355988	MGP_C57BL6NJ_G0020849(Rreb1)
BP	GO:0060560	developmental growth involved in morphogenesis	2	215	0.17442	0.357032	MGP_C57BL6NJ_G0026135(Zeb2),MGP_C57BL6NJ_G0034792(Nrp1)
BP	GO:0043170	macromolecule metabolic process	31	7655	0.17479	0.357032	MGP_C57BL6NJ_G0016210(St18),MGP_C57BL6NJ_G0016429(Satb2),MGP_C57BL6NJ_G0016617(Pid1),MGP_C57BL6NJ_G0016986(Fam129a),MGP_C57BL6NJ_G0017366(Cd34),MGP_C57BL6NJ_G0020259(Gphn),MGP_C57BL6NJ_G0020351(Batf),MGP_C57BL6NJ_G0020849(Rreb1),MGP_C57BL6NJ_G0021322(Il6st),MGP_C57BL6NJ_G0021878(Hmbox1),MGP_C57BL6NJ_G0021900(Adra1a),MGP_C57BL6NJ_G0021906(Ppp2r2a),MGP_C57BL6NJ_G0021963(Itm2b),MGP_C57BL6NJ_G0022290…
BP	GO:1903530	regulation of secretion by cell	4	623	0.17499	0.357032	MGP_C57BL6NJ_G0017366(Cd34),MGP_C57BL6NJ_G0021900(Adra1a),MGP_C57BL6NJ_G0024409(Myom1),MGP_C57BL6NJ_G0033450(Prkcb)
BP	GO:0009058	biosynthetic process	21	4907	0.17508	0.357032	MGP_C57BL6NJ_G0016210(St18),MGP_C57BL6NJ_G0016429(Satb2),MGP_C57BL6NJ_G0016617(Pid1),MGP_C57BL6NJ_G0016986(Fam129a),MGP_C57BL6NJ_G0017366(Cd34),MGP_C57BL6NJ_G0020259(Gphn),MGP_C57BL6NJ_G0020351(Batf),MGP_C57BL6NJ_G0020849(Rreb1),MGP_C57BL6NJ_G0021878(Hmbox1),MGP_C57BL6NJ_G0021963(Itm2b),MGP_C57BL6NJ_G0022517(Mkl1),MGP_C57BL6NJ_G0025810(Pdss1),MGP_C57BL6NJ_G0026135(Zeb2),MGP_C57BL6NJ_G0026261(Atp5…
BP	GO:0007389	pattern specification process	3	411	0.17514	0.357032	MGP_C57BL6NJ_G0016429(Satb2),MGP_C57BL6NJ_G0026135(Zeb2),MGP_C57BL6NJ_G0034792(Nrp1)
CC	GO:0043231	intracellular membrane-bounded organelle	34	8668	0.1755	0.357032	MGP_C57BL6NJ_G0016210(St18),MGP_C57BL6NJ_G0016429(Satb2),MGP_C57BL6NJ_G0016967(Trove2),MGP_C57BL6NJ_G0017366(Cd34),MGP_C57BL6NJ_G0019711(Pitpnc1),MGP_C57BL6NJ_G0019782(Armc7),MGP_C57BL6NJ_G0020351(Batf),MGP_C57BL6NJ_G0020402(Efcab11),MGP_C57BL6NJ_G0020849(Rreb1),MGP_C57BL6NJ_G0021878(Hmbox1),MGP_C57BL6NJ_G0021900(Adra1a),MGP_C57BL6NJ_G0021924(Gm21685),MGP_C57BL6NJ_G0021963(Itm2b),MGP_C57BL6NJ_G00…
BP	GO:0006310	DNA recombination	2	216	0.17567	0.357032	MGP_C57BL6NJ_G0020351(Batf),MGP_C57BL6NJ_G0022290(Nsmce2)
BP	GO:0009167	purine ribonucleoside monophosphate metabolic process	2	216	0.17567	0.357032	MGP_C57BL6NJ_G0016617(Pid1),MGP_C57BL6NJ_G0026261(Atp5g3)
BP	GO:0048193	Golgi vesicle transport	2	216	0.17567	0.357032	MGP_C57BL6NJ_G0024426(Ehd3),MGP_C57BL6NJ_G0028281(Ap1ar)
BP	GO:0071345	cellular response to cytokine stimulus	4	624	0.17568	0.357032	MGP_C57BL6NJ_G0016210(St18),MGP_C57BL6NJ_G0016617(Pid1),MGP_C57BL6NJ_G0021322(Il6st),MGP_C57BL6NJ_G0035602(Syncrip)
CC	GO:0031526	brush border membrane	1	56	0.1761	0.357032	MGP_C57BL6NJ_G0033450(Prkcb)
BP	GO:0002562	somatic diversification of immune receptors via germline recombination within a single locus	1	55	0.17616	0.357032	MGP_C57BL6NJ_G0020351(Batf)
BP	GO:0016444	somatic cell DNA recombination	1	55	0.17616	0.357032	MGP_C57BL6NJ_G0020351(Batf)
BP	GO:0030239	myofibril assembly	1	55	0.17616	0.357032	MGP_C57BL6NJ_G0024409(Myom1)
BP	GO:0042093	T-helper cell differentiation	1	55	0.17616	0.357032	MGP_C57BL6NJ_G0020351(Batf)
BP	GO:0048844	artery morphogenesis	1	55	0.17616	0.357032	MGP_C57BL6NJ_G0034792(Nrp1)
BP	GO:0050771	negative regulation of axonogenesis	1	55	0.17616	0.357032	MGP_C57BL6NJ_G0034792(Nrp1)
BP	GO:0010556	regulation of macromolecule biosynthetic process	15	3323	0.1764	0.357032	MGP_C57BL6NJ_G0016210(St18),MGP_C57BL6NJ_G0016429(Satb2),MGP_C57BL6NJ_G0016617(Pid1),MGP_C57BL6NJ_G0016986(Fam129a),MGP_C57BL6NJ_G0020351(Batf),MGP_C57BL6NJ_G0020849(Rreb1),MGP_C57BL6NJ_G0021878(Hmbox1),MGP_C57BL6NJ_G0021963(Itm2b),MGP_C57BL6NJ_G0022517(Mkl1),MGP_C57BL6NJ_G0026135(Zeb2),MGP_C57BL6NJ_G0032858(Klhl25),MGP_C57BL6NJ_G0033450(Prkcb),MGP_C57BL6NJ_G0035015(Fli1),MGP_C57BL6NJ_G0035508(Rf…
CC	GO:0044456	synapse part	5	864	0.1766	0.357032	MGP_C57BL6NJ_G0020259(Gphn),MGP_C57BL6NJ_G0021900(Adra1a),MGP_C57BL6NJ_G0022301(Asap1),MGP_C57BL6NJ_G0026118(Dennd1a),MGP_C57BL6NJ_G0029285(Epb41)
CC	GO:0030425	dendrite	4	637	0.1767	0.357032	MGP_C57BL6NJ_G0020259(Gphn),MGP_C57BL6NJ_G0021322(Il6st),MGP_C57BL6NJ_G0022301(Asap1),MGP_C57BL6NJ_G0026118(Dennd1a)
BP	GO:0001525	angiogenesis	3	413	0.17688	0.357032	MGP_C57BL6NJ_G0017366(Cd34),MGP_C57BL6NJ_G0033450(Prkcb),MGP_C57BL6NJ_G0034792(Nrp1)
MF	GO:0032559	adenyl ribonucleotide binding	7	1293	0.17689	0.357032	MGP_C57BL6NJ_G0020259(Gphn),MGP_C57BL6NJ_G0021963(Itm2b),MGP_C57BL6NJ_G0024426(Ehd3),MGP_C57BL6NJ_G0024850(Csnk1g3),MGP_C57BL6NJ_G0030171(Cdkl2),MGP_C57BL6NJ_G0033450(Prkcb),MGP_C57BL6NJ_G0036487(Abcb7)
BP	GO:0009126	purine nucleoside monophosphate metabolic process	2	217	0.17693	0.357032	MGP_C57BL6NJ_G0016617(Pid1),MGP_C57BL6NJ_G0026261(Atp5g3)
BP	GO:1902533	positive regulation of intracellular signal transduction	5	852	0.17872	0.358813	MGP_C57BL6NJ_G0021322(Il6st),MGP_C57BL6NJ_G0021900(Adra1a),MGP_C57BL6NJ_G0026135(Zeb2),MGP_C57BL6NJ_G0033450(Prkcb),MGP_C57BL6NJ_G0034792(Nrp1)
MF	GO:0001190	transcriptional activator activity, RNA polymerase II transcription factor binding	1	55	0.17897	0.358813	MGP_C57BL6NJ_G0022517(Mkl1)
MF	GO:0004722	protein serine/threonine phosphatase activity	1	55	0.17897	0.358813	MGP_C57BL6NJ_G0021906(Ppp2r2a)
MF	GO:0019003	GDP binding	1	55	0.17897	0.358813	MGP_C57BL6NJ_G0024539(Rab18)
CC	GO:0030660	Golgi-associated vesicle membrane	1	57	0.179	0.358813	MGP_C57BL6NJ_G0021963(Itm2b)
CC	GO:0055038	recycling endosome membrane	1	57	0.179	0.358813	MGP_C57BL6NJ_G0024426(Ehd3)
BP	GO:0002294	CD4-positive, alpha-beta T cell differentiation involved in immune response	1	56	0.17906	0.358813	MGP_C57BL6NJ_G0020351(Batf)
BP	GO:0010507	negative regulation of autophagy	1	56	0.17906	0.358813	MGP_C57BL6NJ_G0021900(Adra1a)
BP	GO:0051145	smooth muscle cell differentiation	1	56	0.17906	0.358813	MGP_C57BL6NJ_G0022517(Mkl1)
BP	GO:0030335	positive regulation of cell migration	3	416	0.1795	0.359128	MGP_C57BL6NJ_G0020849(Rreb1),MGP_C57BL6NJ_G0021322(Il6st),MGP_C57BL6NJ_G0034792(Nrp1)
CC	GO:0031090	organelle membrane	10	2096	0.1804	0.359128	MGP_C57BL6NJ_G0021900(Adra1a),MGP_C57BL6NJ_G0021924(Gm21685),MGP_C57BL6NJ_G0021963(Itm2b),MGP_C57BL6NJ_G0024426(Ehd3),MGP_C57BL6NJ_G0026118(Dennd1a),MGP_C57BL6NJ_G0026261(Atp5g3),MGP_C57BL6NJ_G0028083(Man1a2),MGP_C57BL6NJ_G0034283(Tmem38a),MGP_C57BL6NJ_G0034287(Large),MGP_C57BL6NJ_G0036487(Abcb7)
MF	GO:0005096	GTPase activator activity	2	216	0.18044	0.359128	MGP_C57BL6NJ_G0022301(Asap1),MGP_C57BL6NJ_G0034792(Nrp1)
MF	GO:0005198	structural molecule activity	4	620	0.18048	0.359128	MGP_C57BL6NJ_G0020259(Gphn),MGP_C57BL6NJ_G0024409(Myom1),MGP_C57BL6NJ_G0029285(Epb41),MGP_C57BL6NJ_G0031664(Mfap5)
BP	GO:0042493	response to drug	2	220	0.1807	0.359128	MGP_C57BL6NJ_G0021900(Adra1a),MGP_C57BL6NJ_G0033450(Prkcb)
CC	GO:0036477	somatodendritic compartment	5	872	0.1813	0.359128	MGP_C57BL6NJ_G0020259(Gphn),MGP_C57BL6NJ_G0021322(Il6st),MGP_C57BL6NJ_G0022301(Asap1),MGP_C57BL6NJ_G0026118(Dennd1a),MGP_C57BL6NJ_G0034792(Nrp1)
MF	GO:0030554	adenyl nucleotide binding	7	1303	0.18173	0.359128	MGP_C57BL6NJ_G0020259(Gphn),MGP_C57BL6NJ_G0021963(Itm2b),MGP_C57BL6NJ_G0024426(Ehd3),MGP_C57BL6NJ_G0024850(Csnk1g3),MGP_C57BL6NJ_G0030171(Cdkl2),MGP_C57BL6NJ_G0033450(Prkcb),MGP_C57BL6NJ_G0036487(Abcb7)
CC	GO:0031463	Cul3-RING ubiquitin ligase complex	1	58	0.1818	0.359128	MGP_C57BL6NJ_G0032858(Klhl25)
MF	GO:0004714	transmembrane receptor protein tyrosine kinase activity	1	56	0.18191	0.359128	MGP_C57BL6NJ_G0034792(Nrp1)
MF	GO:0005548	phospholipid transporter activity	1	56	0.18191	0.359128	MGP_C57BL6NJ_G0019711(Pitpnc1)
BP	GO:0002293	alpha-beta T cell differentiation involved in immune response	1	57	0.18196	0.359128	MGP_C57BL6NJ_G0020351(Batf)
BP	GO:0006809	nitric oxide biosynthetic process	1	57	0.18196	0.359128	MGP_C57BL6NJ_G0017366(Cd34)
BP	GO:0007045	cell-substrate adherens junction assembly	1	57	0.18196	0.359128	MGP_C57BL6NJ_G0034792(Nrp1)
BP	GO:0032623	interleukin-2 production	1	57	0.18196	0.359128	MGP_C57BL6NJ_G0017366(Cd34)
BP	GO:0033047	regulation of mitotic sister chromatid segregation	1	57	0.18196	0.359128	MGP_C57BL6NJ_G0022290(Nsmce2)
BP	GO:0042147	retrograde transport, endosome to Golgi	1	57	0.18196	0.359128	MGP_C57BL6NJ_G0024426(Ehd3)
BP	GO:0048041	focal adhesion assembly	1	57	0.18196	0.359128	MGP_C57BL6NJ_G0034792(Nrp1)
BP	GO:2001259	positive regulation of cation channel activity	1	57	0.18196	0.359128	MGP_C57BL6NJ_G0024426(Ehd3)
BP	GO:1901990	regulation of mitotic cell cycle phase transition	2	221	0.18196	0.359128	MGP_C57BL6NJ_G0016617(Pid1),MGP_C57BL6NJ_G0022290(Nsmce2)
BP	GO:0070838	divalent metal ion transport	3	419	0.18213	0.359128	MGP_C57BL6NJ_G0021900(Adra1a),MGP_C57BL6NJ_G0024426(Ehd3),MGP_C57BL6NJ_G0033450(Prkcb)
BP	GO:0072657	protein localization to membrane	3	419	0.18213	0.359128	MGP_C57BL6NJ_G0016617(Pid1),MGP_C57BL6NJ_G0020259(Gphn),MGP_C57BL6NJ_G0024426(Ehd3)
CC	GO:0044297	cell body	4	646	0.1829	0.360371	MGP_C57BL6NJ_G0020259(Gphn),MGP_C57BL6NJ_G0021322(Il6st),MGP_C57BL6NJ_G0026118(Dennd1a),MGP_C57BL6NJ_G0034792(Nrp1)
BP	GO:0072593	reactive oxygen species metabolic process	2	222	0.18322	0.360727	MGP_C57BL6NJ_G0016617(Pid1),MGP_C57BL6NJ_G0017366(Cd34)
BP	GO:0072511	divalent inorganic cation transport	3	422	0.18477	0.362284	MGP_C57BL6NJ_G0021900(Adra1a),MGP_C57BL6NJ_G0024426(Ehd3),MGP_C57BL6NJ_G0033450(Prkcb)
BP	GO:0002287	alpha-beta T cell activation involved in immune response	1	58	0.18484	0.362284	MGP_C57BL6NJ_G0020351(Batf)
BP	GO:0046128	purine ribonucleoside metabolic process	1	58	0.18484	0.362284	MGP_C57BL6NJ_G0020259(Gphn)
MF	GO:0005546	phosphatidylinositol-4,5-bisphosphate binding	1	57	0.18485	0.362284	MGP_C57BL6NJ_G0022301(Asap1)
MF	GO:0016765	transferase activity, transferring alkyl or aryl (other than methyl) groups	1	57	0.18485	0.362284	MGP_C57BL6NJ_G0025810(Pdss1)
MF	GO:0019829	cation-transporting ATPase activity	1	57	0.18485	0.362284	MGP_C57BL6NJ_G0026261(Atp5g3)
CC	GO:0005813	centrosome	3	430	0.185	0.362303	MGP_C57BL6NJ_G0020402(Efcab11),MGP_C57BL6NJ_G0030171(Cdkl2),MGP_C57BL6NJ_G0033450(Prkcb)
BP	GO:0023051	regulation of signaling	13	2833	0.18529	0.362597	MGP_C57BL6NJ_G0016210(St18),MGP_C57BL6NJ_G0016617(Pid1),MGP_C57BL6NJ_G0021322(Il6st),MGP_C57BL6NJ_G0021900(Adra1a),MGP_C57BL6NJ_G0022517(Mkl1),MGP_C57BL6NJ_G0024287(Plcl2),MGP_C57BL6NJ_G0024426(Ehd3),MGP_C57BL6NJ_G0024850(Csnk1g3),MGP_C57BL6NJ_G0026118(Dennd1a),MGP_C57BL6NJ_G0026135(Zeb2),MGP_C57BL6NJ_G0028281(Ap1ar),MGP_C57BL6NJ_G0033450(Prkcb),MGP_C57BL6NJ_G0034792(Nrp1)
CC	GO:0005912	adherens junction	3	431	0.1859	0.363516	MGP_C57BL6NJ_G0018428(Tns3),MGP_C57BL6NJ_G0024426(Ehd3),MGP_C57BL6NJ_G0034792(Nrp1)
BP	GO:0007010	cytoskeleton organization	6	1098	0.18667	0.364746	MGP_C57BL6NJ_G0020402(Efcab11),MGP_C57BL6NJ_G0022517(Mkl1),MGP_C57BL6NJ_G0024409(Myom1),MGP_C57BL6NJ_G0028281(Ap1ar),MGP_C57BL6NJ_G0029285(Epb41),MGP_C57BL6NJ_G0034792(Nrp1)
BP	GO:0019637	organophosphate metabolic process	5	866	0.18711	0.364967	MGP_C57BL6NJ_G0016617(Pid1),MGP_C57BL6NJ_G0017454(Pde7b),MGP_C57BL6NJ_G0019711(Pitpnc1),MGP_C57BL6NJ_G0020259(Gphn),MGP_C57BL6NJ_G0026261(Atp5g3)
MF	GO:0016773	phosphotransferase activity, alcohol group as acceptor	4	630	0.18765	0.364967	MGP_C57BL6NJ_G0024850(Csnk1g3),MGP_C57BL6NJ_G0030171(Cdkl2),MGP_C57BL6NJ_G0033450(Prkcb),MGP_C57BL6NJ_G0034792(Nrp1)
BP	GO:0042509	regulation of tyrosine phosphorylation of STAT protein	1	59	0.18771	0.364967	MGP_C57BL6NJ_G0021322(Il6st)
BP	GO:0045669	positive regulation of osteoblast differentiation	1	59	0.18771	0.364967	MGP_C57BL6NJ_G0021322(Il6st)
BP	GO:1902803	regulation of synaptic vesicle transport	1	59	0.18771	0.364967	MGP_C57BL6NJ_G0021900(Adra1a)
BP	GO:0042327	positive regulation of phosphorylation	5	867	0.18771	0.364967	MGP_C57BL6NJ_G0016986(Fam129a),MGP_C57BL6NJ_G0021322(Il6st),MGP_C57BL6NJ_G0021900(Adra1a),MGP_C57BL6NJ_G0026135(Zeb2),MGP_C57BL6NJ_G0034792(Nrp1)
MF	GO:0042625	ATPase coupled ion transmembrane transporter activity	1	58	0.18777	0.364967	MGP_C57BL6NJ_G0026261(Atp5g3)
BP	GO:0006486	protein glycosylation	2	226	0.18828	0.365136	MGP_C57BL6NJ_G0028083(Man1a2),MGP_C57BL6NJ_G0034287(Large)
BP	GO:0009161	ribonucleoside monophosphate metabolic process	2	226	0.18828	0.365136	MGP_C57BL6NJ_G0016617(Pid1),MGP_C57BL6NJ_G0026261(Atp5g3)
BP	GO:0043413	macromolecule glycosylation	2	226	0.18828	0.365136	MGP_C57BL6NJ_G0028083(Man1a2),MGP_C57BL6NJ_G0034287(Large)
CC	GO:0044430	cytoskeletal part	7	1365	0.1887	0.365677	MGP_C57BL6NJ_G0020402(Efcab11),MGP_C57BL6NJ_G0022301(Asap1),MGP_C57BL6NJ_G0024409(Myom1),MGP_C57BL6NJ_G0029745(Ccdc146),MGP_C57BL6NJ_G0030171(Cdkl2),MGP_C57BL6NJ_G0033450(Prkcb),MGP_C57BL6NJ_G0034792(Nrp1)
MF	GO:0003713	transcription coactivator activity	2	223	0.18945	0.366856	MGP_C57BL6NJ_G0022517(Mkl1),MGP_C57BL6NJ_G0033450(Prkcb)
BP	GO:0002200	somatic diversification of immune receptors	1	60	0.19057	0.367102	MGP_C57BL6NJ_G0020351(Batf)
BP	GO:0006940	regulation of smooth muscle contraction	1	60	0.19057	0.367102	MGP_C57BL6NJ_G0021900(Adra1a)
BP	GO:0010833	telomere maintenance via telomere lengthening	1	60	0.19057	0.367102	MGP_C57BL6NJ_G0021878(Hmbox1)
BP	GO:0046209	nitric oxide metabolic process	1	60	0.19057	0.367102	MGP_C57BL6NJ_G0017366(Cd34)
BP	GO:0048747	muscle fiber development	1	60	0.19057	0.367102	MGP_C57BL6NJ_G0024409(Myom1)
BP	GO:0050433	regulation of catecholamine secretion	1	60	0.19057	0.367102	MGP_C57BL6NJ_G0033450(Prkcb)
BP	GO:0072583	clathrin-dependent endocytosis	1	60	0.19057	0.367102	MGP_C57BL6NJ_G0026118(Dennd1a)
BP	GO:0051258	protein polymerization	2	228	0.19082	0.367211	MGP_C57BL6NJ_G0020402(Efcab11),MGP_C57BL6NJ_G0028281(Ap1ar)
BP	GO:0050790	regulation of catalytic activity	9	1835	0.19091	0.367211	MGP_C57BL6NJ_G0016210(St18),MGP_C57BL6NJ_G0021878(Hmbox1),MGP_C57BL6NJ_G0021900(Adra1a),MGP_C57BL6NJ_G0021906(Ppp2r2a),MGP_C57BL6NJ_G0022301(Asap1),MGP_C57BL6NJ_G0022517(Mkl1),MGP_C57BL6NJ_G0026118(Dennd1a),MGP_C57BL6NJ_G0026135(Zeb2),MGP_C57BL6NJ_G0034792(Nrp1)
BP	GO:0003007	heart morphogenesis	2	229	0.19209	0.368659	MGP_C57BL6NJ_G0024409(Myom1),MGP_C57BL6NJ_G0034792(Nrp1)
BP	GO:0050714	positive regulation of protein secretion	2	229	0.19209	0.368659	MGP_C57BL6NJ_G0017366(Cd34),MGP_C57BL6NJ_G0024409(Myom1)
BP	GO:1901653	cellular response to peptide	2	229	0.19209	0.368659	MGP_C57BL6NJ_G0016617(Pid1),MGP_C57BL6NJ_G0033450(Prkcb)
MF	GO:0035639	purine ribonucleoside triphosphate binding	8	1565	0.19286	0.369023	MGP_C57BL6NJ_G0020259(Gphn),MGP_C57BL6NJ_G0021963(Itm2b),MGP_C57BL6NJ_G0024426(Ehd3),MGP_C57BL6NJ_G0024539(Rab18),MGP_C57BL6NJ_G0024850(Csnk1g3),MGP_C57BL6NJ_G0030171(Cdkl2),MGP_C57BL6NJ_G0033450(Prkcb),MGP_C57BL6NJ_G0036487(Abcb7)
CC	GO:0016459	myosin complex	1	62	0.1931	0.369023	MGP_C57BL6NJ_G0024409(Myom1)
BP	GO:0060485	mesenchyme development	2	230	0.19337	0.369023	MGP_C57BL6NJ_G0026135(Zeb2),MGP_C57BL6NJ_G0034792(Nrp1)
BP	GO:0003333	amino acid transmembrane transport	1	61	0.19342	0.369023	MGP_C57BL6NJ_G0028496(Slc7a13)
BP	GO:0015807	L-amino acid transport	1	61	0.19342	0.369023	MGP_C57BL6NJ_G0028496(Slc7a13)
BP	GO:0035418	protein localization to synapse	1	61	0.19342	0.369023	MGP_C57BL6NJ_G0020259(Gphn)
BP	GO:1901888	regulation of cell junction assembly	1	61	0.19342	0.369023	MGP_C57BL6NJ_G0034792(Nrp1)
BP	GO:1903578	regulation of ATP metabolic process	1	61	0.19342	0.369023	MGP_C57BL6NJ_G0016617(Pid1)
CC	GO:0070161	anchoring junction	3	441	0.1946	0.369672	MGP_C57BL6NJ_G0018428(Tns3),MGP_C57BL6NJ_G0024426(Ehd3),MGP_C57BL6NJ_G0034792(Nrp1)
BP	GO:1901564	organonitrogen compound metabolic process	23	5522	0.19469	0.369672	MGP_C57BL6NJ_G0016210(St18),MGP_C57BL6NJ_G0016617(Pid1),MGP_C57BL6NJ_G0016986(Fam129a),MGP_C57BL6NJ_G0017454(Pde7b),MGP_C57BL6NJ_G0020259(Gphn),MGP_C57BL6NJ_G0021322(Il6st),MGP_C57BL6NJ_G0021900(Adra1a),MGP_C57BL6NJ_G0021906(Ppp2r2a),MGP_C57BL6NJ_G0021963(Itm2b),MGP_C57BL6NJ_G0022290(Nsmce2),MGP_C57BL6NJ_G0022517(Mkl1),MGP_C57BL6NJ_G0024287(Plcl2),MGP_C57BL6NJ_G0024850(Csnk1g3),MGP_C57BL6NJ_G0026…
CC	GO:0005768	endosome	4	663	0.1948	0.369672	MGP_C57BL6NJ_G0021963(Itm2b),MGP_C57BL6NJ_G0024426(Ehd3),MGP_C57BL6NJ_G0028281(Ap1ar),MGP_C57BL6NJ_G0034792(Nrp1)
CC	GO:0098588	bounding membrane of organelle	7	1378	0.1949	0.369672	MGP_C57BL6NJ_G0021924(Gm21685),MGP_C57BL6NJ_G0021963(Itm2b),MGP_C57BL6NJ_G0024426(Ehd3),MGP_C57BL6NJ_G0026118(Dennd1a),MGP_C57BL6NJ_G0028083(Man1a2),MGP_C57BL6NJ_G0034283(Tmem38a),MGP_C57BL6NJ_G0034287(Large)
BP	GO:0032870	cellular response to hormone stimulus	3	434	0.19543	0.369672	MGP_C57BL6NJ_G0016617(Pid1),MGP_C57BL6NJ_G0021587(Ptger2),MGP_C57BL6NJ_G0033450(Prkcb)
CC	GO:0016528	sarcoplasm	1	63	0.1959	0.369672	MGP_C57BL6NJ_G0034283(Tmem38a)
BP	GO:0009887	animal organ morphogenesis	5	881	0.19625	0.369672	MGP_C57BL6NJ_G0016429(Satb2),MGP_C57BL6NJ_G0017366(Cd34),MGP_C57BL6NJ_G0024409(Myom1),MGP_C57BL6NJ_G0034792(Nrp1),MGP_C57BL6NJ_G0035015(Fli1)
BP	GO:0002292	T cell differentiation involved in immune response	1	62	0.19627	0.369672	MGP_C57BL6NJ_G0020351(Batf)
BP	GO:0007260	tyrosine phosphorylation of STAT protein	1	62	0.19627	0.369672	MGP_C57BL6NJ_G0021322(Il6st)
BP	GO:0015914	phospholipid transport	1	62	0.19627	0.369672	MGP_C57BL6NJ_G0019711(Pitpnc1)
BP	GO:0022029	telencephalon cell migration	1	62	0.19627	0.369672	MGP_C57BL6NJ_G0034792(Nrp1)
BP	GO:0042278	purine nucleoside metabolic process	1	62	0.19627	0.369672	MGP_C57BL6NJ_G0020259(Gphn)
BP	GO:0046785	microtubule polymerization	1	62	0.19627	0.369672	MGP_C57BL6NJ_G0020402(Efcab11)
BP	GO:0050432	catecholamine secretion	1	62	0.19627	0.369672	MGP_C57BL6NJ_G0033450(Prkcb)
BP	GO:0051785	positive regulation of nuclear division	1	62	0.19627	0.369672	MGP_C57BL6NJ_G0022290(Nsmce2)
CC	GO:0043232	intracellular non-membrane-bounded organelle	15	3449	0.1963	0.369672	MGP_C57BL6NJ_G0016429(Satb2),MGP_C57BL6NJ_G0020259(Gphn),MGP_C57BL6NJ_G0020402(Efcab11),MGP_C57BL6NJ_G0020849(Rreb1),MGP_C57BL6NJ_G0021878(Hmbox1),MGP_C57BL6NJ_G0021900(Adra1a),MGP_C57BL6NJ_G0022290(Nsmce2),MGP_C57BL6NJ_G0022301(Asap1),MGP_C57BL6NJ_G0024409(Myom1),MGP_C57BL6NJ_G0026135(Zeb2),MGP_C57BL6NJ_G0029285(Epb41),MGP_C57BL6NJ_G0029745(Ccdc146),MGP_C57BL6NJ_G0030171(Cdkl2),MGP_C57BL6NJ_G003…
BP	GO:0090407	organophosphate biosynthetic process	3	435	0.19633	0.369672	MGP_C57BL6NJ_G0016617(Pid1),MGP_C57BL6NJ_G0020259(Gphn),MGP_C57BL6NJ_G0026261(Atp5g3)
BP	GO:2000147	positive regulation of cell motility	3	435	0.19633	0.369672	MGP_C57BL6NJ_G0020849(Rreb1),MGP_C57BL6NJ_G0021322(Il6st),MGP_C57BL6NJ_G0034792(Nrp1)
BP	GO:0044089	positive regulation of cellular component biogenesis	3	436	0.19723	0.371096	MGP_C57BL6NJ_G0022301(Asap1),MGP_C57BL6NJ_G0028281(Ap1ar),MGP_C57BL6NJ_G0034792(Nrp1)
BP	GO:0022607	cellular component assembly	11	2356	0.19792	0.371563	MGP_C57BL6NJ_G0016967(Trove2),MGP_C57BL6NJ_G0017366(Cd34),MGP_C57BL6NJ_G0020259(Gphn),MGP_C57BL6NJ_G0020402(Efcab11),MGP_C57BL6NJ_G0022301(Asap1),MGP_C57BL6NJ_G0024409(Myom1),MGP_C57BL6NJ_G0024426(Ehd3),MGP_C57BL6NJ_G0025810(Pdss1),MGP_C57BL6NJ_G0028281(Ap1ar),MGP_C57BL6NJ_G0029285(Epb41),MGP_C57BL6NJ_G0034792(Nrp1)
BP	GO:0009895	negative regulation of catabolic process	2	234	0.19847	0.371563	MGP_C57BL6NJ_G0021900(Adra1a),MGP_C57BL6NJ_G0035602(Syncrip)
MF	GO:0030695	GTPase regulator activity	2	230	0.19852	0.371563	MGP_C57BL6NJ_G0022301(Asap1),MGP_C57BL6NJ_G0034792(Nrp1)
CC	GO:0044451	nucleoplasm part	5	901	0.1986	0.371563	MGP_C57BL6NJ_G0016429(Satb2),MGP_C57BL6NJ_G0020849(Rreb1),MGP_C57BL6NJ_G0021878(Hmbox1),MGP_C57BL6NJ_G0022290(Nsmce2),MGP_C57BL6NJ_G0035015(Fli1)
BP	GO:0051222	positive regulation of protein transport	3	438	0.19903	0.371563	MGP_C57BL6NJ_G0017366(Cd34),MGP_C57BL6NJ_G0024409(Myom1),MGP_C57BL6NJ_G0030171(Cdkl2)
BP	GO:0014910	regulation of smooth muscle cell migration	1	63	0.1991	0.371563	MGP_C57BL6NJ_G0021322(Il6st)
BP	GO:0043507	positive regulation of JUN kinase activity	1	63	0.1991	0.371563	MGP_C57BL6NJ_G0026135(Zeb2)
BP	GO:0060976	coronary vasculature development	1	63	0.1991	0.371563	MGP_C57BL6NJ_G0034792(Nrp1)
BP	GO:0061180	mammary gland epithelium development	1	63	0.1991	0.371563	MGP_C57BL6NJ_G0020849(Rreb1)
BP	GO:1901992	positive regulation of mitotic cell cycle phase transition	1	63	0.1991	0.371563	MGP_C57BL6NJ_G0022290(Nsmce2)
BP	GO:1903312	negative regulation of mRNA metabolic process	1	63	0.1991	0.371563	MGP_C57BL6NJ_G0035602(Syncrip)
CC	GO:0043228	non-membrane-bounded organelle	15	3458	0.1992	0.371563	MGP_C57BL6NJ_G0016429(Satb2),MGP_C57BL6NJ_G0020259(Gphn),MGP_C57BL6NJ_G0020402(Efcab11),MGP_C57BL6NJ_G0020849(Rreb1),MGP_C57BL6NJ_G0021878(Hmbox1),MGP_C57BL6NJ_G0021900(Adra1a),MGP_C57BL6NJ_G0022290(Nsmce2),MGP_C57BL6NJ_G0022301(Asap1),MGP_C57BL6NJ_G0024409(Myom1),MGP_C57BL6NJ_G0026135(Zeb2),MGP_C57BL6NJ_G0029285(Epb41),MGP_C57BL6NJ_G0029745(Ccdc146),MGP_C57BL6NJ_G0030171(Cdkl2),MGP_C57BL6NJ_G003…
BP	GO:0016358	dendrite development	2	236	0.20102	0.374111	MGP_C57BL6NJ_G0022301(Asap1),MGP_C57BL6NJ_G0034792(Nrp1)
CC	GO:0044431	Golgi apparatus part	4	673	0.2019	0.374111	MGP_C57BL6NJ_G0021924(Gm21685),MGP_C57BL6NJ_G0021963(Itm2b),MGP_C57BL6NJ_G0028083(Man1a2),MGP_C57BL6NJ_G0034287(Large)
BP	GO:0002088	lens development in camera-type eye	1	64	0.20192	0.374111	MGP_C57BL6NJ_G0026135(Zeb2)
BP	GO:0005977	glycogen metabolic process	1	64	0.20192	0.374111	MGP_C57BL6NJ_G0021322(Il6st)
BP	GO:0006073	cellular glucan metabolic process	1	64	0.20192	0.374111	MGP_C57BL6NJ_G0021322(Il6st)
BP	GO:0032204	regulation of telomere maintenance	1	64	0.20192	0.374111	MGP_C57BL6NJ_G0021878(Hmbox1)
BP	GO:0033209	tumor necrosis factor-mediated signaling pathway	1	64	0.20192	0.374111	MGP_C57BL6NJ_G0016210(St18)
BP	GO:0044042	glucan metabolic process	1	64	0.20192	0.374111	MGP_C57BL6NJ_G0021322(Il6st)
BP	GO:2001057	reactive nitrogen species metabolic process	1	64	0.20192	0.374111	MGP_C57BL6NJ_G0017366(Cd34)
MF	GO:0000979	RNA polymerase II core promoter sequence-specific DNA binding	1	63	0.20223	0.374111	MGP_C57BL6NJ_G0020849(Rreb1)
MF	GO:0019888	protein phosphatase regulator activity	1	63	0.20223	0.374111	MGP_C57BL6NJ_G0021906(Ppp2r2a)
BP	GO:0070085	glycosylation	2	237	0.2023	0.374111	MGP_C57BL6NJ_G0028083(Man1a2),MGP_C57BL6NJ_G0034287(Large)
BP	GO:0043410	positive regulation of MAPK cascade	3	442	0.20263	0.374453	MGP_C57BL6NJ_G0021900(Adra1a),MGP_C57BL6NJ_G0026135(Zeb2),MGP_C57BL6NJ_G0034792(Nrp1)
BP	GO:0034645	cellular macromolecule biosynthetic process	17	3940	0.20455	0.376989	MGP_C57BL6NJ_G0016210(St18),MGP_C57BL6NJ_G0016429(Satb2),MGP_C57BL6NJ_G0016617(Pid1),MGP_C57BL6NJ_G0016986(Fam129a),MGP_C57BL6NJ_G0020351(Batf),MGP_C57BL6NJ_G0020849(Rreb1),MGP_C57BL6NJ_G0021878(Hmbox1),MGP_C57BL6NJ_G0021963(Itm2b),MGP_C57BL6NJ_G0022517(Mkl1),MGP_C57BL6NJ_G0026135(Zeb2),MGP_C57BL6NJ_G0028083(Man1a2),MGP_C57BL6NJ_G0032858(Klhl25),MGP_C57BL6NJ_G0033450(Prkcb),MGP_C57BL6NJ_G0034287(…
BP	GO:0021885	forebrain cell migration	1	65	0.20473	0.376989	MGP_C57BL6NJ_G0034792(Nrp1)
BP	GO:0034333	adherens junction assembly	1	65	0.20473	0.376989	MGP_C57BL6NJ_G0034792(Nrp1)
BP	GO:1902117	positive regulation of organelle assembly	1	65	0.20473	0.376989	MGP_C57BL6NJ_G0022301(Asap1)
BP	GO:1903035	negative regulation of response to wounding	1	65	0.20473	0.376989	MGP_C57BL6NJ_G0017366(Cd34)
BP	GO:0016192	vesicle-mediated transport	6	1132	0.20518	0.377549	MGP_C57BL6NJ_G0021900(Adra1a),MGP_C57BL6NJ_G0024426(Ehd3),MGP_C57BL6NJ_G0024850(Csnk1g3),MGP_C57BL6NJ_G0026118(Dennd1a),MGP_C57BL6NJ_G0026178(Cd302),MGP_C57BL6NJ_G0028281(Ap1ar)
BP	GO:0000904	cell morphogenesis involved in differentiation	4	666	0.2056	0.378053	MGP_C57BL6NJ_G0020849(Rreb1),MGP_C57BL6NJ_G0026135(Zeb2),MGP_C57BL6NJ_G0028281(Ap1ar),MGP_C57BL6NJ_G0034792(Nrp1)
BP	GO:0051051	negative regulation of transport	3	446	0.20626	0.378997	MGP_C57BL6NJ_G0016617(Pid1),MGP_C57BL6NJ_G0017366(Cd34),MGP_C57BL6NJ_G0033450(Prkcb)
BP	GO:0045165	cell fate commitment	2	241	0.20743	0.379306	MGP_C57BL6NJ_G0016429(Satb2),MGP_C57BL6NJ_G0020351(Batf)
BP	GO:0014015	positive regulation of gliogenesis	1	66	0.20754	0.379306	MGP_C57BL6NJ_G0021322(Il6st)
BP	GO:0021766	hippocampus development	1	66	0.20754	0.379306	MGP_C57BL6NJ_G0026135(Zeb2)
BP	GO:0051492	regulation of stress fiber assembly	1	66	0.20754	0.379306	MGP_C57BL6NJ_G0034792(Nrp1)
BP	GO:0055008	cardiac muscle tissue morphogenesis	1	66	0.20754	0.379306	MGP_C57BL6NJ_G0024409(Myom1)
BP	GO:0071347	cellular response to interleukin-1	1	66	0.20754	0.379306	MGP_C57BL6NJ_G0016210(St18)
BP	GO:1904427	positive regulation of calcium ion transmembrane transport	1	66	0.20754	0.379306	MGP_C57BL6NJ_G0024426(Ehd3)
BP	GO:0044237	cellular metabolic process	34	8635	0.2076	0.379306	MGP_C57BL6NJ_G0016210(St18),MGP_C57BL6NJ_G0016429(Satb2),MGP_C57BL6NJ_G0016617(Pid1),MGP_C57BL6NJ_G0016986(Fam129a),MGP_C57BL6NJ_G0017366(Cd34),MGP_C57BL6NJ_G0017454(Pde7b),MGP_C57BL6NJ_G0019711(Pitpnc1),MGP_C57BL6NJ_G0020259(Gphn),MGP_C57BL6NJ_G0020351(Batf),MGP_C57BL6NJ_G0020849(Rreb1),MGP_C57BL6NJ_G0021322(Il6st),MGP_C57BL6NJ_G0021878(Hmbox1),MGP_C57BL6NJ_G0021900(Adra1a),MGP_C57BL6NJ_G0021906…
MF	GO:0008227	G-protein coupled amine receptor activity	1	65	0.20794	0.379659	MGP_C57BL6NJ_G0021900(Adra1a)
BP	GO:0030111	regulation of Wnt signaling pathway	2	242	0.20872	0.380815	MGP_C57BL6NJ_G0024850(Csnk1g3),MGP_C57BL6NJ_G0026135(Zeb2)
BP	GO:0051272	positive regulation of cellular component movement	3	449	0.20898	0.381021	MGP_C57BL6NJ_G0020849(Rreb1),MGP_C57BL6NJ_G0021322(Il6st),MGP_C57BL6NJ_G0034792(Nrp1)
BP	GO:0007044	cell-substrate junction assembly	1	67	0.21033	0.382136	MGP_C57BL6NJ_G0034792(Nrp1)
BP	GO:0033045	regulation of sister chromatid segregation	1	67	0.21033	0.382136	MGP_C57BL6NJ_G0022290(Nsmce2)
BP	GO:0043488	regulation of mRNA stability	1	67	0.21033	0.382136	MGP_C57BL6NJ_G0035602(Syncrip)
BP	GO:0051881	regulation of mitochondrial membrane potential	1	67	0.21033	0.382136	MGP_C57BL6NJ_G0016617(Pid1)
BP	GO:0098693	regulation of synaptic vesicle cycle	1	67	0.21033	0.382136	MGP_C57BL6NJ_G0021900(Adra1a)
MF	GO:0043178	alcohol binding	1	66	0.21078	0.382204	MGP_C57BL6NJ_G0024287(Plcl2)
BP	GO:0044057	regulation of system process	3	451	0.21081	0.382204	MGP_C57BL6NJ_G0021587(Ptger2),MGP_C57BL6NJ_G0021900(Adra1a),MGP_C57BL6NJ_G0024426(Ehd3)
BP	GO:1904951	positive regulation of establishment of protein localization	3	451	0.21081	0.382204	MGP_C57BL6NJ_G0017366(Cd34),MGP_C57BL6NJ_G0024409(Myom1),MGP_C57BL6NJ_G0030171(Cdkl2)
MF	GO:0032555	purine ribonucleotide binding	8	1604	0.21117	0.382271	MGP_C57BL6NJ_G0020259(Gphn),MGP_C57BL6NJ_G0021963(Itm2b),MGP_C57BL6NJ_G0024426(Ehd3),MGP_C57BL6NJ_G0024539(Rab18),MGP_C57BL6NJ_G0024850(Csnk1g3),MGP_C57BL6NJ_G0030171(Cdkl2),MGP_C57BL6NJ_G0033450(Prkcb),MGP_C57BL6NJ_G0036487(Abcb7)
BP	GO:0009123	nucleoside monophosphate metabolic process	2	244	0.21129	0.382271	MGP_C57BL6NJ_G0016617(Pid1),MGP_C57BL6NJ_G0026261(Atp5g3)
BP	GO:1901987	regulation of cell cycle phase transition	2	244	0.21129	0.382271	MGP_C57BL6NJ_G0016617(Pid1),MGP_C57BL6NJ_G0022290(Nsmce2)
MF	GO:0016740	transferase activity	10	2101	0.2124	0.383687	MGP_C57BL6NJ_G0020259(Gphn),MGP_C57BL6NJ_G0021878(Hmbox1),MGP_C57BL6NJ_G0022290(Nsmce2),MGP_C57BL6NJ_G0024850(Csnk1g3),MGP_C57BL6NJ_G0025810(Pdss1),MGP_C57BL6NJ_G0030171(Cdkl2),MGP_C57BL6NJ_G0031590(Mkrn2),MGP_C57BL6NJ_G0033450(Prkcb),MGP_C57BL6NJ_G0034287(Large),MGP_C57BL6NJ_G0034792(Nrp1)
CC	GO:0099056	integral component of presynaptic membrane	1	69	0.2125	0.383687	MGP_C57BL6NJ_G0021900(Adra1a)
BP	GO:0045597	positive regulation of cell differentiation	5	908	0.21311	0.383687	MGP_C57BL6NJ_G0017366(Cd34),MGP_C57BL6NJ_G0020849(Rreb1),MGP_C57BL6NJ_G0021322(Il6st),MGP_C57BL6NJ_G0026135(Zeb2),MGP_C57BL6NJ_G0034792(Nrp1)
BP	GO:0019229	regulation of vasoconstriction	1	68	0.21311	0.383687	MGP_C57BL6NJ_G0021900(Adra1a)
BP	GO:0043279	response to alkaloid	1	68	0.21311	0.383687	MGP_C57BL6NJ_G0021906(Ppp2r2a)
BP	GO:0046324	regulation of glucose import	1	68	0.21311	0.383687	MGP_C57BL6NJ_G0016617(Pid1)
BP	GO:0061515	myeloid cell development	1	68	0.21311	0.383687	MGP_C57BL6NJ_G0035015(Fli1)
MF	GO:0035258	steroid hormone receptor binding	1	67	0.21361	0.38432	MGP_C57BL6NJ_G0033450(Prkcb)
BP	GO:0045321	leukocyte activation	4	678	0.21442	0.38543	MGP_C57BL6NJ_G0020351(Batf),MGP_C57BL6NJ_G0021322(Il6st),MGP_C57BL6NJ_G0024287(Plcl2),MGP_C57BL6NJ_G0033450(Prkcb)
CC	GO:0005776	autophagosome	1	70	0.2152	0.38543	MGP_C57BL6NJ_G0021924(Gm21685)
BP	GO:0051253	negative regulation of RNA metabolic process	6	1150	0.21525	0.38543	MGP_C57BL6NJ_G0016210(St18),MGP_C57BL6NJ_G0016429(Satb2),MGP_C57BL6NJ_G0020849(Rreb1),MGP_C57BL6NJ_G0021878(Hmbox1),MGP_C57BL6NJ_G0026135(Zeb2),MGP_C57BL6NJ_G0035602(Syncrip)
BP	GO:0050769	positive regulation of neurogenesis	3	456	0.21538	0.38543	MGP_C57BL6NJ_G0021322(Il6st),MGP_C57BL6NJ_G0026135(Zeb2),MGP_C57BL6NJ_G0034792(Nrp1)
BP	GO:0008593	regulation of Notch signaling pathway	1	69	0.21589	0.38543	MGP_C57BL6NJ_G0021322(Il6st)
BP	GO:0014909	smooth muscle cell migration	1	69	0.21589	0.38543	MGP_C57BL6NJ_G0021322(Il6st)
BP	GO:0048708	astrocyte differentiation	1	69	0.21589	0.38543	MGP_C57BL6NJ_G0021322(Il6st)
BP	GO:0051651	maintenance of location in cell	1	69	0.21589	0.38543	MGP_C57BL6NJ_G0029285(Epb41)
BP	GO:0060411	cardiac septum morphogenesis	1	69	0.21589	0.38543	MGP_C57BL6NJ_G0034792(Nrp1)
BP	GO:1903955	positive regulation of protein targeting to mitochondrion	1	69	0.21589	0.38543	MGP_C57BL6NJ_G0030171(Cdkl2)
MF	GO:0097367	carbohydrate derivative binding	9	1861	0.21626	0.38543	MGP_C57BL6NJ_G0020259(Gphn),MGP_C57BL6NJ_G0021963(Itm2b),MGP_C57BL6NJ_G0024426(Ehd3),MGP_C57BL6NJ_G0024539(Rab18),MGP_C57BL6NJ_G0024850(Csnk1g3),MGP_C57BL6NJ_G0030171(Cdkl2),MGP_C57BL6NJ_G0033450(Prkcb),MGP_C57BL6NJ_G0034792(Nrp1),MGP_C57BL6NJ_G0036487(Abcb7)
CC	GO:0005794	Golgi apparatus	6	1173	0.2163	0.38543	MGP_C57BL6NJ_G0021924(Gm21685),MGP_C57BL6NJ_G0021963(Itm2b),MGP_C57BL6NJ_G0024539(Rab18),MGP_C57BL6NJ_G0028083(Man1a2),MGP_C57BL6NJ_G0028281(Ap1ar),MGP_C57BL6NJ_G0034287(Large)
BP	GO:0051146	striated muscle cell differentiation	2	248	0.21644	0.38543	MGP_C57BL6NJ_G0021900(Adra1a),MGP_C57BL6NJ_G0024409(Myom1)
MF	GO:0017076	purine nucleotide binding	8	1615	0.21646	0.38543	MGP_C57BL6NJ_G0020259(Gphn),MGP_C57BL6NJ_G0021963(Itm2b),MGP_C57BL6NJ_G0024426(Ehd3),MGP_C57BL6NJ_G0024539(Rab18),MGP_C57BL6NJ_G0024850(Csnk1g3),MGP_C57BL6NJ_G0030171(Cdkl2),MGP_C57BL6NJ_G0033450(Prkcb),MGP_C57BL6NJ_G0036487(Abcb7)
MF	GO:0032553	ribonucleotide binding	8	1615	0.21646	0.38543	MGP_C57BL6NJ_G0020259(Gphn),MGP_C57BL6NJ_G0021963(Itm2b),MGP_C57BL6NJ_G0024426(Ehd3),MGP_C57BL6NJ_G0024539(Rab18),MGP_C57BL6NJ_G0024850(Csnk1g3),MGP_C57BL6NJ_G0030171(Cdkl2),MGP_C57BL6NJ_G0033450(Prkcb),MGP_C57BL6NJ_G0036487(Abcb7)
BP	GO:0002376	immune system process	9	1896	0.21729	0.386142	MGP_C57BL6NJ_G0016967(Trove2),MGP_C57BL6NJ_G0017366(Cd34),MGP_C57BL6NJ_G0020351(Batf),MGP_C57BL6NJ_G0021322(Il6st),MGP_C57BL6NJ_G0024287(Plcl2),MGP_C57BL6NJ_G0031664(Mfap5),MGP_C57BL6NJ_G0033450(Prkcb),MGP_C57BL6NJ_G0035015(Fli1),MGP_C57BL6NJ_G0035602(Syncrip)
BP	GO:0051271	negative regulation of cellular component movement	2	249	0.21773	0.386142	MGP_C57BL6NJ_G0028281(Ap1ar),MGP_C57BL6NJ_G0034792(Nrp1)
CC	GO:0030662	coated vesicle membrane	1	71	0.2179	0.386142	MGP_C57BL6NJ_G0026118(Dennd1a)
MF	GO:0045296	cadherin binding	2	245	0.21812	0.386142	MGP_C57BL6NJ_G0019782(Armc7),MGP_C57BL6NJ_G0022301(Asap1)
BP	GO:0043933	macromolecular complex subunit organization	8	1647	0.21819	0.386142	MGP_C57BL6NJ_G0020259(Gphn),MGP_C57BL6NJ_G0020402(Efcab11),MGP_C57BL6NJ_G0022301(Asap1),MGP_C57BL6NJ_G0024409(Myom1),MGP_C57BL6NJ_G0024426(Ehd3),MGP_C57BL6NJ_G0025810(Pdss1),MGP_C57BL6NJ_G0028281(Ap1ar),MGP_C57BL6NJ_G0029285(Epb41)
BP	GO:0003151	outflow tract morphogenesis	1	70	0.21865	0.386142	MGP_C57BL6NJ_G0034792(Nrp1)
BP	GO:0030193	regulation of blood coagulation	1	70	0.21865	0.386142	MGP_C57BL6NJ_G0017366(Cd34)
BP	GO:0038034	signal transduction in absence of ligand	1	70	0.21865	0.386142	MGP_C57BL6NJ_G0021963(Itm2b)
BP	GO:0043367	CD4-positive, alpha-beta T cell differentiation	1	70	0.21865	0.386142	MGP_C57BL6NJ_G0020351(Batf)
BP	GO:0045685	regulation of glial cell differentiation	1	70	0.21865	0.386142	MGP_C57BL6NJ_G0021322(Il6st)
BP	GO:0097192	extrinsic apoptotic signaling pathway in absence of ligand	1	70	0.21865	0.386142	MGP_C57BL6NJ_G0021963(Itm2b)
BP	GO:1900046	regulation of hemostasis	1	70	0.21865	0.386142	MGP_C57BL6NJ_G0017366(Cd34)
BP	GO:0046651	lymphocyte proliferation	2	250	0.21902	0.386532	MGP_C57BL6NJ_G0021322(Il6st),MGP_C57BL6NJ_G0024287(Plcl2)
MF	GO:0032947	protein complex scaffold activity	1	69	0.21925	0.386675	MGP_C57BL6NJ_G0020259(Gphn)
CC	GO:0031982	vesicle	14	3252	0.2198	0.387381	MGP_C57BL6NJ_G0016986(Fam129a),MGP_C57BL6NJ_G0020849(Rreb1),MGP_C57BL6NJ_G0021322(Il6st),MGP_C57BL6NJ_G0021924(Gm21685),MGP_C57BL6NJ_G0021963(Itm2b),MGP_C57BL6NJ_G0022940(Snx29),MGP_C57BL6NJ_G0024426(Ehd3),MGP_C57BL6NJ_G0024539(Rab18),MGP_C57BL6NJ_G0026118(Dennd1a),MGP_C57BL6NJ_G0028083(Man1a2),MGP_C57BL6NJ_G0028281(Ap1ar),MGP_C57BL6NJ_G0033450(Prkcb),MGP_C57BL6NJ_G0034283(Tmem38a),MGP_C57BL6NJ_G…
BP	GO:0040017	positive regulation of locomotion	3	461	0.21998	0.387434	MGP_C57BL6NJ_G0020849(Rreb1),MGP_C57BL6NJ_G0021322(Il6st),MGP_C57BL6NJ_G0034792(Nrp1)
CC	GO:0031965	nuclear membrane	2	256	0.2208	0.387668	MGP_C57BL6NJ_G0021900(Adra1a),MGP_C57BL6NJ_G0034283(Tmem38a)
BP	GO:0002009	morphogenesis of an epithelium	3	462	0.2209	0.387668	MGP_C57BL6NJ_G0020849(Rreb1),MGP_C57BL6NJ_G0026135(Zeb2),MGP_C57BL6NJ_G0034792(Nrp1)
BP	GO:0006720	isoprenoid metabolic process	1	71	0.22141	0.387668	MGP_C57BL6NJ_G0025810(Pdss1)
BP	GO:0007009	plasma membrane organization	1	71	0.22141	0.387668	MGP_C57BL6NJ_G0022301(Asap1)
BP	GO:0021675	nerve development	1	71	0.22141	0.387668	MGP_C57BL6NJ_G0034792(Nrp1)
BP	GO:0043535	regulation of blood vessel endothelial cell migration	1	71	0.22141	0.387668	MGP_C57BL6NJ_G0034792(Nrp1)
BP	GO:0055072	iron ion homeostasis	1	71	0.22141	0.387668	MGP_C57BL6NJ_G0036487(Abcb7)
BP	GO:1903749	positive regulation of establishment of protein localization to mitochondrion	1	71	0.22141	0.387668	MGP_C57BL6NJ_G0030171(Cdkl2)
BP	GO:0032102	negative regulation of response to external stimulus	2	252	0.22161	0.387668	MGP_C57BL6NJ_G0017366(Cd34),MGP_C57BL6NJ_G0034792(Nrp1)
BP	GO:0032943	mononuclear cell proliferation	2	252	0.22161	0.387668	MGP_C57BL6NJ_G0021322(Il6st),MGP_C57BL6NJ_G0024287(Plcl2)
MF	GO:0015297	antiporter activity	1	70	0.22205	0.388175	MGP_C57BL6NJ_G0028496(Slc7a13)
CC	GO:0044454	nuclear chromosome part	3	472	0.2223	0.38835	MGP_C57BL6NJ_G0016429(Satb2),MGP_C57BL6NJ_G0021878(Hmbox1),MGP_C57BL6NJ_G0026135(Zeb2)
BP	GO:0030154	cell differentiation	15	3464	0.22246	0.388367	MGP_C57BL6NJ_G0016429(Satb2),MGP_C57BL6NJ_G0017366(Cd34),MGP_C57BL6NJ_G0020351(Batf),MGP_C57BL6NJ_G0020849(Rreb1),MGP_C57BL6NJ_G0021322(Il6st),MGP_C57BL6NJ_G0021900(Adra1a),MGP_C57BL6NJ_G0022301(Asap1),MGP_C57BL6NJ_G0022517(Mkl1),MGP_C57BL6NJ_G0024287(Plcl2),MGP_C57BL6NJ_G0024409(Myom1),MGP_C57BL6NJ_G0026135(Zeb2),MGP_C57BL6NJ_G0028281(Ap1ar),MGP_C57BL6NJ_G0034792(Nrp1),MGP_C57BL6NJ_G0035015(Fli1…
BP	GO:0010975	regulation of neuron projection development	3	464	0.22274	0.388594	MGP_C57BL6NJ_G0022301(Asap1),MGP_C57BL6NJ_G0026135(Zeb2),MGP_C57BL6NJ_G0034792(Nrp1)
BP	GO:0016050	vesicle organization	2	253	0.2229	0.388612	MGP_C57BL6NJ_G0017366(Cd34),MGP_C57BL6NJ_G0026135(Zeb2)
BP	GO:0007041	lysosomal transport	1	72	0.22415	0.389288	MGP_C57BL6NJ_G0024426(Ehd3)
BP	GO:0030810	positive regulation of nucleotide biosynthetic process	1	72	0.22415	0.389288	MGP_C57BL6NJ_G0016617(Pid1)
BP	GO:0043154	negative regulation of cysteine-type endopeptidase activity involved in apoptotic process	1	72	0.22415	0.389288	MGP_C57BL6NJ_G0022517(Mkl1)
BP	GO:0043502	regulation of muscle adaptation	1	72	0.22415	0.389288	MGP_C57BL6NJ_G0021900(Adra1a)
BP	GO:1900373	positive regulation of purine nucleotide biosynthetic process	1	72	0.22415	0.389288	MGP_C57BL6NJ_G0016617(Pid1)
BP	GO:0002793	positive regulation of peptide secretion	2	254	0.22419	0.389288	MGP_C57BL6NJ_G0017366(Cd34),MGP_C57BL6NJ_G0024409(Myom1)
BP	GO:0071704	organic substance metabolic process	35	8984	0.22466	0.389372	MGP_C57BL6NJ_G0016210(St18),MGP_C57BL6NJ_G0016429(Satb2),MGP_C57BL6NJ_G0016617(Pid1),MGP_C57BL6NJ_G0016986(Fam129a),MGP_C57BL6NJ_G0017366(Cd34),MGP_C57BL6NJ_G0017454(Pde7b),MGP_C57BL6NJ_G0019711(Pitpnc1),MGP_C57BL6NJ_G0020259(Gphn),MGP_C57BL6NJ_G0020351(Batf),MGP_C57BL6NJ_G0020849(Rreb1),MGP_C57BL6NJ_G0021322(Il6st),MGP_C57BL6NJ_G0021878(Hmbox1),MGP_C57BL6NJ_G0021900(Adra1a),MGP_C57BL6NJ_G0021906…
MF	GO:0015171	amino acid transmembrane transporter activity	1	71	0.22484	0.389372	MGP_C57BL6NJ_G0028496(Slc7a13)
MF	GO:0046332	SMAD binding	1	71	0.22484	0.389372	MGP_C57BL6NJ_G0026135(Zeb2)
MF	GO:0072341	modified amino acid binding	1	71	0.22484	0.389372	MGP_C57BL6NJ_G0022301(Asap1)
BP	GO:0032880	regulation of protein localization	5	927	0.22525	0.389821	MGP_C57BL6NJ_G0016617(Pid1),MGP_C57BL6NJ_G0017366(Cd34),MGP_C57BL6NJ_G0024409(Myom1),MGP_C57BL6NJ_G0029285(Epb41),MGP_C57BL6NJ_G0030171(Cdkl2)
BP	GO:0090066	regulation of anatomical structure size	3	467	0.22552	0.390028	MGP_C57BL6NJ_G0021900(Adra1a),MGP_C57BL6NJ_G0028281(Ap1ar),MGP_C57BL6NJ_G0034792(Nrp1)
CC	GO:0098889	intrinsic component of presynaptic membrane	1	74	0.226	0.390595	MGP_C57BL6NJ_G0021900(Adra1a)
BP	GO:0034097	response to cytokine	4	694	0.22635	0.390595	MGP_C57BL6NJ_G0016210(St18),MGP_C57BL6NJ_G0016617(Pid1),MGP_C57BL6NJ_G0021322(Il6st),MGP_C57BL6NJ_G0035602(Syncrip)
BP	GO:0009165	nucleotide biosynthetic process	2	256	0.22678	0.390595	MGP_C57BL6NJ_G0016617(Pid1),MGP_C57BL6NJ_G0026261(Atp5g3)
BP	GO:0046928	regulation of neurotransmitter secretion	1	73	0.22689	0.390595	MGP_C57BL6NJ_G0021900(Adra1a)
BP	GO:0050818	regulation of coagulation	1	73	0.22689	0.390595	MGP_C57BL6NJ_G0017366(Cd34)
MF	GO:0004620	phospholipase activity	1	72	0.22762	0.390595	MGP_C57BL6NJ_G0024287(Plcl2)
MF	GO:0019199	transmembrane receptor protein kinase activity	1	72	0.22762	0.390595	MGP_C57BL6NJ_G0034792(Nrp1)
MF	GO:0099106	ion channel regulator activity	1	72	0.22762	0.390595	MGP_C57BL6NJ_G0033450(Prkcb)
BP	GO:0072359	circulatory system development	5	931	0.22783	0.390595	MGP_C57BL6NJ_G0017366(Cd34),MGP_C57BL6NJ_G0021900(Adra1a),MGP_C57BL6NJ_G0024409(Myom1),MGP_C57BL6NJ_G0033450(Prkcb),MGP_C57BL6NJ_G0034792(Nrp1)
BP	GO:0040013	negative regulation of locomotion	2	257	0.22808	0.390595	MGP_C57BL6NJ_G0028281(Ap1ar),MGP_C57BL6NJ_G0034792(Nrp1)
BP	GO:0043434	response to peptide hormone	2	257	0.22808	0.390595	MGP_C57BL6NJ_G0016617(Pid1),MGP_C57BL6NJ_G0033450(Prkcb)
BP	GO:0000278	mitotic cell cycle	4	697	0.22861	0.390595	MGP_C57BL6NJ_G0016617(Pid1),MGP_C57BL6NJ_G0020402(Efcab11),MGP_C57BL6NJ_G0021906(Ppp2r2a),MGP_C57BL6NJ_G0022290(Nsmce2)
BP	GO:0051046	regulation of secretion	4	697	0.22861	0.390595	MGP_C57BL6NJ_G0017366(Cd34),MGP_C57BL6NJ_G0021900(Adra1a),MGP_C57BL6NJ_G0024409(Myom1),MGP_C57BL6NJ_G0033450(Prkcb)
CC	GO:0071013	catalytic step 2 spliceosome	1	75	0.2287	0.390595	MGP_C57BL6NJ_G0035602(Syncrip)
BP	GO:0002757	immune response-activating signal transduction	2	258	0.22937	0.390595	MGP_C57BL6NJ_G0024287(Plcl2),MGP_C57BL6NJ_G0033450(Prkcb)
BP	GO:1901293	nucleoside phosphate biosynthetic process	2	258	0.22937	0.390595	MGP_C57BL6NJ_G0016617(Pid1),MGP_C57BL6NJ_G0026261(Atp5g3)
BP	GO:0010595	positive regulation of endothelial cell migration	1	74	0.22962	0.390595	MGP_C57BL6NJ_G0034792(Nrp1)
BP	GO:0017158	regulation of calcium ion-dependent exocytosis	1	74	0.22962	0.390595	MGP_C57BL6NJ_G0021900(Adra1a)
BP	GO:0043487	regulation of RNA stability	1	74	0.22962	0.390595	MGP_C57BL6NJ_G0035602(Syncrip)
BP	GO:0048663	neuron fate commitment	1	74	0.22962	0.390595	MGP_C57BL6NJ_G0016429(Satb2)
BP	GO:0060998	regulation of dendritic spine development	1	74	0.22962	0.390595	MGP_C57BL6NJ_G0022301(Asap1)
BP	GO:0061097	regulation of protein tyrosine kinase activity	1	74	0.22962	0.390595	MGP_C57BL6NJ_G0021900(Adra1a)
BP	GO:0097581	lamellipodium organization	1	74	0.22962	0.390595	MGP_C57BL6NJ_G0020849(Rreb1)
BP	GO:1901019	regulation of calcium ion transmembrane transporter activity	1	74	0.22962	0.390595	MGP_C57BL6NJ_G0024426(Ehd3)
BP	GO:1901989	positive regulation of cell cycle phase transition	1	74	0.22962	0.390595	MGP_C57BL6NJ_G0022290(Nsmce2)
CC	GO:0016605	PML body	1	76	0.2314	0.393139	MGP_C57BL6NJ_G0022290(Nsmce2)
BP	GO:0001756	somitogenesis	1	75	0.23233	0.393139	MGP_C57BL6NJ_G0026135(Zeb2)
BP	GO:0006112	energy reserve metabolic process	1	75	0.23233	0.393139	MGP_C57BL6NJ_G0021322(Il6st)
BP	GO:0042770	signal transduction in response to DNA damage	1	75	0.23233	0.393139	MGP_C57BL6NJ_G0020351(Batf)
BP	GO:0043506	regulation of JUN kinase activity	1	75	0.23233	0.393139	MGP_C57BL6NJ_G0026135(Zeb2)
BP	GO:0060415	muscle tissue morphogenesis	1	75	0.23233	0.393139	MGP_C57BL6NJ_G0024409(Myom1)
BP	GO:0110020	regulation of actomyosin structure organization	1	75	0.23233	0.393139	MGP_C57BL6NJ_G0034792(Nrp1)
BP	GO:1903426	regulation of reactive oxygen species biosynthetic process	1	75	0.23233	0.393139	MGP_C57BL6NJ_G0017366(Cd34)
MF	GO:0019208	phosphatase regulator activity	1	74	0.23315	0.394269	MGP_C57BL6NJ_G0021906(Ppp2r2a)
BP	GO:1901576	organic substance biosynthetic process	20	4839	0.23351	0.39462	MGP_C57BL6NJ_G0016210(St18),MGP_C57BL6NJ_G0016429(Satb2),MGP_C57BL6NJ_G0016617(Pid1),MGP_C57BL6NJ_G0016986(Fam129a),MGP_C57BL6NJ_G0020259(Gphn),MGP_C57BL6NJ_G0020351(Batf),MGP_C57BL6NJ_G0020849(Rreb1),MGP_C57BL6NJ_G0021878(Hmbox1),MGP_C57BL6NJ_G0021963(Itm2b),MGP_C57BL6NJ_G0022517(Mkl1),MGP_C57BL6NJ_G0025810(Pdss1),MGP_C57BL6NJ_G0026135(Zeb2),MGP_C57BL6NJ_G0026261(Atp5g3),MGP_C57BL6NJ_G0028083(Ma…
BP	GO:0071456	cellular response to hypoxia	1	76	0.23504	0.396687	MGP_C57BL6NJ_G0017366(Cd34)
BP	GO:2001237	negative regulation of extrinsic apoptotic signaling pathway	1	76	0.23504	0.396687	MGP_C57BL6NJ_G0034792(Nrp1)
BP	GO:0070661	leukocyte proliferation	2	264	0.23716	0.399681	MGP_C57BL6NJ_G0021322(Il6st),MGP_C57BL6NJ_G0024287(Plcl2)
BP	GO:0003300	cardiac muscle hypertrophy	1	77	0.23774	0.399681	MGP_C57BL6NJ_G0021900(Adra1a)
BP	GO:0046427	positive regulation of JAK-STAT cascade	1	77	0.23774	0.399681	MGP_C57BL6NJ_G0021322(Il6st)
BP	GO:0051304	chromosome separation	1	77	0.23774	0.399681	MGP_C57BL6NJ_G0022290(Nsmce2)
BP	GO:0051937	catecholamine transport	1	77	0.23774	0.399681	MGP_C57BL6NJ_G0033450(Prkcb)
BP	GO:0060840	artery development	1	77	0.23774	0.399681	MGP_C57BL6NJ_G0034792(Nrp1)
CC	GO:0005938	cell cortex	2	270	0.2387	0.401035	MGP_C57BL6NJ_G0026178(Cd302),MGP_C57BL6NJ_G0029285(Epb41)
BP	GO:0006811	ion transport	7	1439	0.23909	0.401429	MGP_C57BL6NJ_G0019711(Pitpnc1),MGP_C57BL6NJ_G0021900(Adra1a),MGP_C57BL6NJ_G0024426(Ehd3),MGP_C57BL6NJ_G0026261(Atp5g3),MGP_C57BL6NJ_G0028496(Slc7a13),MGP_C57BL6NJ_G0033450(Prkcb),MGP_C57BL6NJ_G0034283(Tmem38a)
BP	GO:0009059	macromolecule biosynthetic process	17	4049	0.24012	0.402374	MGP_C57BL6NJ_G0016210(St18),MGP_C57BL6NJ_G0016429(Satb2),MGP_C57BL6NJ_G0016617(Pid1),MGP_C57BL6NJ_G0016986(Fam129a),MGP_C57BL6NJ_G0020351(Batf),MGP_C57BL6NJ_G0020849(Rreb1),MGP_C57BL6NJ_G0021878(Hmbox1),MGP_C57BL6NJ_G0021963(Itm2b),MGP_C57BL6NJ_G0022517(Mkl1),MGP_C57BL6NJ_G0026135(Zeb2),MGP_C57BL6NJ_G0028083(Man1a2),MGP_C57BL6NJ_G0032858(Klhl25),MGP_C57BL6NJ_G0033450(Prkcb),MGP_C57BL6NJ_G0034287(…
BP	GO:0009119	ribonucleoside metabolic process	1	78	0.24043	0.402374	MGP_C57BL6NJ_G0020259(Gphn)
BP	GO:0036294	cellular response to decreased oxygen levels	1	78	0.24043	0.402374	MGP_C57BL6NJ_G0017366(Cd34)
BP	GO:0055017	cardiac muscle tissue growth	1	78	0.24043	0.402374	MGP_C57BL6NJ_G0021900(Adra1a)
BP	GO:1904894	positive regulation of STAT cascade	1	78	0.24043	0.402374	MGP_C57BL6NJ_G0021322(Il6st)
CC	GO:0005886	plasma membrane	20	4953	0.2409	0.402901	MGP_C57BL6NJ_G0016986(Fam129a),MGP_C57BL6NJ_G0017366(Cd34),MGP_C57BL6NJ_G0019782(Armc7),MGP_C57BL6NJ_G0020259(Gphn),MGP_C57BL6NJ_G0021322(Il6st),MGP_C57BL6NJ_G0021587(Ptger2),MGP_C57BL6NJ_G0021900(Adra1a),MGP_C57BL6NJ_G0021963(Itm2b),MGP_C57BL6NJ_G0022301(Asap1),MGP_C57BL6NJ_G0024119(Olfr114),MGP_C57BL6NJ_G0024426(Ehd3),MGP_C57BL6NJ_G0024539(Rab18),MGP_C57BL6NJ_G0024850(Csnk1g3),MGP_C57BL6NJ_G002…
BP	GO:0043010	camera-type eye development	2	267	0.24106	0.402908	MGP_C57BL6NJ_G0026135(Zeb2),MGP_C57BL6NJ_G0034792(Nrp1)
BP	GO:0048646	anatomical structure formation involved in morphogenesis	5	952	0.24155	0.403466	MGP_C57BL6NJ_G0017366(Cd34),MGP_C57BL6NJ_G0024409(Myom1),MGP_C57BL6NJ_G0026135(Zeb2),MGP_C57BL6NJ_G0033450(Prkcb),MGP_C57BL6NJ_G0034792(Nrp1)
BP	GO:0002027	regulation of heart rate	1	79	0.24311	0.404246	MGP_C57BL6NJ_G0021900(Adra1a)
BP	GO:0030038	contractile actin filament bundle assembly	1	79	0.24311	0.404246	MGP_C57BL6NJ_G0034792(Nrp1)
BP	GO:0032231	regulation of actin filament bundle assembly	1	79	0.24311	0.404246	MGP_C57BL6NJ_G0034792(Nrp1)
BP	GO:0043149	stress fiber assembly	1	79	0.24311	0.404246	MGP_C57BL6NJ_G0034792(Nrp1)
BP	GO:0046323	glucose import	1	79	0.24311	0.404246	MGP_C57BL6NJ_G0016617(Pid1)
BP	GO:0070555	response to interleukin-1	1	79	0.24311	0.404246	MGP_C57BL6NJ_G0016210(St18)
BP	GO:1903076	regulation of protein localization to plasma membrane	1	79	0.24311	0.404246	MGP_C57BL6NJ_G0016617(Pid1)
BP	GO:0006732	coenzyme metabolic process	2	269	0.24366	0.404901	MGP_C57BL6NJ_G0020259(Gphn),MGP_C57BL6NJ_G0025810(Pdss1)
BP	GO:0007423	sensory organ development	3	487	0.24419	0.405521	MGP_C57BL6NJ_G0024539(Rab18),MGP_C57BL6NJ_G0026135(Zeb2),MGP_C57BL6NJ_G0034792(Nrp1)
MF	GO:0060589	nucleoside-triphosphatase regulator activity	2	265	0.24452	0.405809	MGP_C57BL6NJ_G0022301(Asap1),MGP_C57BL6NJ_G0034792(Nrp1)
BP	GO:0034655	nucleobase-containing compound catabolic process	2	270	0.24497	0.406078	MGP_C57BL6NJ_G0017454(Pde7b),MGP_C57BL6NJ_G0035602(Syncrip)
BP	GO:0010629	negative regulation of gene expression	7	1451	0.24552	0.406078	MGP_C57BL6NJ_G0016210(St18),MGP_C57BL6NJ_G0016429(Satb2),MGP_C57BL6NJ_G0017366(Cd34),MGP_C57BL6NJ_G0020849(Rreb1),MGP_C57BL6NJ_G0021878(Hmbox1),MGP_C57BL6NJ_G0026135(Zeb2),MGP_C57BL6NJ_G0035602(Syncrip)
BP	GO:0014812	muscle cell migration	1	80	0.24578	0.406078	MGP_C57BL6NJ_G0021322(Il6st)
BP	GO:0014897	striated muscle hypertrophy	1	80	0.24578	0.406078	MGP_C57BL6NJ_G0021900(Adra1a)
BP	GO:0016079	synaptic vesicle exocytosis	1	80	0.24578	0.406078	MGP_C57BL6NJ_G0021900(Adra1a)
BP	GO:0030838	positive regulation of actin filament polymerization	1	80	0.24578	0.406078	MGP_C57BL6NJ_G0028281(Ap1ar)
BP	GO:1903214	regulation of protein targeting to mitochondrion	1	80	0.24578	0.406078	MGP_C57BL6NJ_G0030171(Cdkl2)
BP	GO:0070372	regulation of ERK1 and ERK2 cascade	2	271	0.24627	0.406628	MGP_C57BL6NJ_G0021900(Adra1a),MGP_C57BL6NJ_G0034792(Nrp1)
BP	GO:0051347	positive regulation of transferase activity	3	490	0.24701	0.407243	MGP_C57BL6NJ_G0021878(Hmbox1),MGP_C57BL6NJ_G0021900(Adra1a),MGP_C57BL6NJ_G0026135(Zeb2)
BP	GO:0051640	organelle localization	3	490	0.24701	0.407243	MGP_C57BL6NJ_G0021900(Adra1a),MGP_C57BL6NJ_G0026118(Dennd1a),MGP_C57BL6NJ_G0028281(Ap1ar)
CC	GO:0005901	caveola	1	82	0.2472	0.407243	MGP_C57BL6NJ_G0021900(Adra1a)
BP	GO:0050768	negative regulation of neurogenesis	2	272	0.24757	0.407243	MGP_C57BL6NJ_G0022301(Asap1),MGP_C57BL6NJ_G0034792(Nrp1)
BP	GO:0010647	positive regulation of cell communication	7	1455	0.24767	0.407243	MGP_C57BL6NJ_G0016210(St18),MGP_C57BL6NJ_G0021322(Il6st),MGP_C57BL6NJ_G0021900(Adra1a),MGP_C57BL6NJ_G0024850(Csnk1g3),MGP_C57BL6NJ_G0026135(Zeb2),MGP_C57BL6NJ_G0033450(Prkcb),MGP_C57BL6NJ_G0034792(Nrp1)
BP	GO:0007229	integrin-mediated signaling pathway	1	81	0.24844	0.407243	MGP_C57BL6NJ_G0034792(Nrp1)
BP	GO:0042100	B cell proliferation	1	81	0.24844	0.407243	MGP_C57BL6NJ_G0024287(Plcl2)
BP	GO:0045185	maintenance of protein location	1	81	0.24844	0.407243	MGP_C57BL6NJ_G0029285(Epb41)
BP	GO:0045778	positive regulation of ossification	1	81	0.24844	0.407243	MGP_C57BL6NJ_G0021322(Il6st)
BP	GO:0071346	cellular response to interferon-gamma	1	81	0.24844	0.407243	MGP_C57BL6NJ_G0035602(Syncrip)
BP	GO:2000379	positive regulation of reactive oxygen species metabolic process	1	81	0.24844	0.407243	MGP_C57BL6NJ_G0016617(Pid1)
BP	GO:0050793	regulation of developmental process	10	2222	0.24853	0.407243	MGP_C57BL6NJ_G0017366(Cd34),MGP_C57BL6NJ_G0020849(Rreb1),MGP_C57BL6NJ_G0021322(Il6st),MGP_C57BL6NJ_G0022301(Asap1),MGP_C57BL6NJ_G0024850(Csnk1g3),MGP_C57BL6NJ_G0026135(Zeb2),MGP_C57BL6NJ_G0028281(Ap1ar),MGP_C57BL6NJ_G0029285(Epb41),MGP_C57BL6NJ_G0033450(Prkcb),MGP_C57BL6NJ_G0034792(Nrp1)
BP	GO:0002764	immune response-regulating signaling pathway	2	273	0.24887	0.407334	MGP_C57BL6NJ_G0024287(Plcl2),MGP_C57BL6NJ_G0033450(Prkcb)
CC	GO:0000228	nuclear chromosome	3	501	0.2489	0.407334	MGP_C57BL6NJ_G0016429(Satb2),MGP_C57BL6NJ_G0021878(Hmbox1),MGP_C57BL6NJ_G0026135(Zeb2)
MF	GO:0001104	RNA polymerase II transcription cofactor activity	1	80	0.24952	0.408091	MGP_C57BL6NJ_G0022517(Mkl1)
CC	GO:0005902	microvillus	1	83	0.2498	0.408291	MGP_C57BL6NJ_G0026178(Cd302)
BP	GO:0010976	positive regulation of neuron projection development	2	274	0.25018	0.40849	MGP_C57BL6NJ_G0026135(Zeb2),MGP_C57BL6NJ_G0034792(Nrp1)
BP	GO:0014896	muscle hypertrophy	1	82	0.25109	0.40849	MGP_C57BL6NJ_G0021900(Adra1a)
BP	GO:0035710	CD4-positive, alpha-beta T cell activation	1	82	0.25109	0.40849	MGP_C57BL6NJ_G0020351(Batf)
BP	GO:0043473	pigmentation	1	82	0.25109	0.40849	MGP_C57BL6NJ_G0026135(Zeb2)
BP	GO:0044264	cellular polysaccharide metabolic process	1	82	0.25109	0.40849	MGP_C57BL6NJ_G0021322(Il6st)
BP	GO:0060021	palate development	1	82	0.25109	0.40849	MGP_C57BL6NJ_G0016429(Satb2)
MF	GO:0017111	nucleoside-triphosphatase activity	4	714	0.25113	0.40849	MGP_C57BL6NJ_G0021924(Gm21685),MGP_C57BL6NJ_G0024539(Rab18),MGP_C57BL6NJ_G0026261(Atp5g3),MGP_C57BL6NJ_G0036487(Abcb7)
BP	GO:0023056	positive regulation of signaling	7	1462	0.25146	0.40849	MGP_C57BL6NJ_G0016210(St18),MGP_C57BL6NJ_G0021322(Il6st),MGP_C57BL6NJ_G0021900(Adra1a),MGP_C57BL6NJ_G0024850(Csnk1g3),MGP_C57BL6NJ_G0026135(Zeb2),MGP_C57BL6NJ_G0033450(Prkcb),MGP_C57BL6NJ_G0034792(Nrp1)
BP	GO:0032956	regulation of actin cytoskeleton organization	2	275	0.25148	0.40849	MGP_C57BL6NJ_G0028281(Ap1ar),MGP_C57BL6NJ_G0034792(Nrp1)
CC	GO:0098687	chromosomal region	2	280	0.2515	0.40849	MGP_C57BL6NJ_G0021878(Hmbox1),MGP_C57BL6NJ_G0022290(Nsmce2)
BP	GO:0048644	muscle organ morphogenesis	1	83	0.25373	0.411596	MGP_C57BL6NJ_G0024409(Myom1)
BP	GO:1903747	regulation of establishment of protein localization to mitochondrion	1	83	0.25373	0.411596	MGP_C57BL6NJ_G0030171(Cdkl2)
BP	GO:0007204	positive regulation of cytosolic calcium ion concentration	2	277	0.25409	0.411922	MGP_C57BL6NJ_G0021587(Ptger2),MGP_C57BL6NJ_G0021900(Adra1a)
BP	GO:0048514	blood vessel morphogenesis	3	498	0.25457	0.412184	MGP_C57BL6NJ_G0017366(Cd34),MGP_C57BL6NJ_G0033450(Prkcb),MGP_C57BL6NJ_G0034792(Nrp1)
BP	GO:2000145	regulation of cell motility	4	731	0.25457	0.412184	MGP_C57BL6NJ_G0020849(Rreb1),MGP_C57BL6NJ_G0021322(Il6st),MGP_C57BL6NJ_G0028281(Ap1ar),MGP_C57BL6NJ_G0034792(Nrp1)
MF	GO:1902936	phosphatidylinositol bisphosphate binding	1	82	0.2549	0.41246	MGP_C57BL6NJ_G0022301(Asap1)
CC	GO:0031984	organelle subcompartment	6	1242	0.2558	0.413658	MGP_C57BL6NJ_G0021924(Gm21685),MGP_C57BL6NJ_G0021963(Itm2b),MGP_C57BL6NJ_G0024539(Rab18),MGP_C57BL6NJ_G0028083(Man1a2),MGP_C57BL6NJ_G0034283(Tmem38a),MGP_C57BL6NJ_G0034287(Large)
BP	GO:0060359	response to ammonium ion	1	84	0.25636	0.413966	MGP_C57BL6NJ_G0021906(Ppp2r2a)
BP	GO:0060419	heart growth	1	84	0.25636	0.413966	MGP_C57BL6NJ_G0021900(Adra1a)
BP	GO:0051259	protein oligomerization	3	500	0.25647	0.413966	MGP_C57BL6NJ_G0020259(Gphn),MGP_C57BL6NJ_G0024426(Ehd3),MGP_C57BL6NJ_G0025810(Pdss1)
MF	GO:0003727	single-stranded RNA binding	1	83	0.25757	0.415482	MGP_C57BL6NJ_G0035602(Syncrip)
BP	GO:0001959	regulation of cytokine-mediated signaling pathway	1	85	0.25899	0.416652	MGP_C57BL6NJ_G0021322(Il6st)
BP	GO:0007569	cell aging	1	85	0.25899	0.416652	MGP_C57BL6NJ_G0022290(Nsmce2)
BP	GO:0046916	cellular transition metal ion homeostasis	1	85	0.25899	0.416652	MGP_C57BL6NJ_G0036487(Abcb7)
BP	GO:0051588	regulation of neurotransmitter transport	1	85	0.25899	0.416652	MGP_C57BL6NJ_G0021900(Adra1a)
CC	GO:0019898	extrinsic component of membrane	2	286	0.2591	0.416652	MGP_C57BL6NJ_G0019782(Armc7),MGP_C57BL6NJ_G0020259(Gphn)
BP	GO:1902903	regulation of supramolecular fiber organization	2	281	0.2593	0.416715	MGP_C57BL6NJ_G0028281(Ap1ar),MGP_C57BL6NJ_G0034792(Nrp1)
CC	GO:0016363	nuclear matrix	1	87	0.2601	0.417448	MGP_C57BL6NJ_G0016429(Satb2)
CC	GO:0099634	postsynaptic specialization membrane	1	87	0.2601	0.417448	MGP_C57BL6NJ_G0020259(Gphn)
MF	GO:0004896	cytokine receptor activity	1	84	0.26024	0.417448	MGP_C57BL6NJ_G0021322(Il6st)
BP	GO:0051248	negative regulation of protein metabolic process	5	982	0.26153	0.417818	MGP_C57BL6NJ_G0016617(Pid1),MGP_C57BL6NJ_G0016986(Fam129a),MGP_C57BL6NJ_G0021963(Itm2b),MGP_C57BL6NJ_G0022517(Mkl1),MGP_C57BL6NJ_G0035602(Syncrip)
BP	GO:0002286	T cell activation involved in immune response	1	86	0.2616	0.417818	MGP_C57BL6NJ_G0020351(Batf)
BP	GO:0009408	response to heat	1	86	0.2616	0.417818	MGP_C57BL6NJ_G0017366(Cd34)
BP	GO:0010927	cellular component assembly involved in morphogenesis	1	86	0.2616	0.417818	MGP_C57BL6NJ_G0024409(Myom1)
BP	GO:0032414	positive regulation of ion transmembrane transporter activity	1	86	0.2616	0.417818	MGP_C57BL6NJ_G0024426(Ehd3)
BP	GO:0061013	regulation of mRNA catabolic process	1	86	0.2616	0.417818	MGP_C57BL6NJ_G0035602(Syncrip)
BP	GO:0120034	positive regulation of plasma membrane bounded cell projection assembly	1	86	0.2616	0.417818	MGP_C57BL6NJ_G0034792(Nrp1)
MF	GO:0003676	nucleic acid binding	14	3250	0.26208	0.418212	MGP_C57BL6NJ_G0016210(St18),MGP_C57BL6NJ_G0016429(Satb2),MGP_C57BL6NJ_G0016967(Trove2),MGP_C57BL6NJ_G0020351(Batf),MGP_C57BL6NJ_G0020849(Rreb1),MGP_C57BL6NJ_G0021878(Hmbox1),MGP_C57BL6NJ_G0022517(Mkl1),MGP_C57BL6NJ_G0026135(Zeb2),MGP_C57BL6NJ_G0027001(Banf2),MGP_C57BL6NJ_G0031590(Mkrn2),MGP_C57BL6NJ_G0035015(Fli1),MGP_C57BL6NJ_G0035508(Rfx7),MGP_C57BL6NJ_G0035602(Syncrip),MGP_C57BL6NJ_G0036143(Rh…
MF	GO:0016301	kinase activity	4	728	0.26217	0.418212	MGP_C57BL6NJ_G0024850(Csnk1g3),MGP_C57BL6NJ_G0030171(Cdkl2),MGP_C57BL6NJ_G0033450(Prkcb),MGP_C57BL6NJ_G0034792(Nrp1)
CC	GO:0010008	endosome membrane	2	289	0.263	0.419278	MGP_C57BL6NJ_G0021963(Itm2b),MGP_C57BL6NJ_G0024426(Ehd3)
BP	GO:0015748	organophosphate ester transport	1	87	0.26421	0.419656	MGP_C57BL6NJ_G0019711(Pitpnc1)
BP	GO:0030516	regulation of axon extension	1	87	0.26421	0.419656	MGP_C57BL6NJ_G0034792(Nrp1)
BP	GO:0042102	positive regulation of T cell proliferation	1	87	0.26421	0.419656	MGP_C57BL6NJ_G0021322(Il6st)
BP	GO:0090263	positive regulation of canonical Wnt signaling pathway	1	87	0.26421	0.419656	MGP_C57BL6NJ_G0024850(Csnk1g3)
BP	GO:1901654	response to ketone	1	87	0.26421	0.419656	MGP_C57BL6NJ_G0021587(Ptger2)
BP	GO:2000117	negative regulation of cysteine-type endopeptidase activity	1	87	0.26421	0.419656	MGP_C57BL6NJ_G0022517(Mkl1)
BP	GO:0046486	glycerolipid metabolic process	2	285	0.26452	0.419891	MGP_C57BL6NJ_G0019711(Pitpnc1),MGP_C57BL6NJ_G0021322(Il6st)
MF	GO:0003682	chromatin binding	3	500	0.26481	0.420094	MGP_C57BL6NJ_G0016429(Satb2),MGP_C57BL6NJ_G0033450(Prkcb),MGP_C57BL6NJ_G0035015(Fli1)
CC	GO:0070062	extracellular exosome	9	2037	0.2655	0.42011	MGP_C57BL6NJ_G0016986(Fam129a),MGP_C57BL6NJ_G0020849(Rreb1),MGP_C57BL6NJ_G0021322(Il6st),MGP_C57BL6NJ_G0021963(Itm2b),MGP_C57BL6NJ_G0022940(Snx29),MGP_C57BL6NJ_G0024539(Rab18),MGP_C57BL6NJ_G0028083(Man1a2),MGP_C57BL6NJ_G0033450(Prkcb),MGP_C57BL6NJ_G0034283(Tmem38a)
BP	GO:0033044	regulation of chromosome organization	2	286	0.26583	0.42011	MGP_C57BL6NJ_G0021878(Hmbox1),MGP_C57BL6NJ_G0022290(Nsmce2)
BP	GO:0070371	ERK1 and ERK2 cascade	2	286	0.26583	0.42011	MGP_C57BL6NJ_G0021900(Adra1a),MGP_C57BL6NJ_G0034792(Nrp1)
BP	GO:0043623	cellular protein complex assembly	3	510	0.26597	0.42011	MGP_C57BL6NJ_G0020402(Efcab11),MGP_C57BL6NJ_G0024409(Myom1),MGP_C57BL6NJ_G0028281(Ap1ar)
CC	GO:0099512	supramolecular fiber	4	760	0.2665	0.42011	MGP_C57BL6NJ_G0021900(Adra1a),MGP_C57BL6NJ_G0024409(Myom1),MGP_C57BL6NJ_G0031664(Mfap5),MGP_C57BL6NJ_G0034792(Nrp1)
CC	GO:0016324	apical plasma membrane	2	292	0.2668	0.42011	MGP_C57BL6NJ_G0017366(Cd34),MGP_C57BL6NJ_G0024539(Rab18)
CC	GO:0045211	postsynaptic membrane	2	292	0.2668	0.42011	MGP_C57BL6NJ_G0020259(Gphn),MGP_C57BL6NJ_G0021900(Adra1a)
BP	GO:0001952	regulation of cell-matrix adhesion	1	88	0.26681	0.42011	MGP_C57BL6NJ_G0034792(Nrp1)
BP	GO:0018958	phenol-containing compound metabolic process	1	88	0.26681	0.42011	MGP_C57BL6NJ_G0026135(Zeb2)
BP	GO:0043666	regulation of phosphoprotein phosphatase activity	1	88	0.26681	0.42011	MGP_C57BL6NJ_G0021906(Ppp2r2a)
BP	GO:0051983	regulation of chromosome segregation	1	88	0.26681	0.42011	MGP_C57BL6NJ_G0022290(Nsmce2)
BP	GO:2000278	regulation of DNA biosynthetic process	1	88	0.26681	0.42011	MGP_C57BL6NJ_G0021878(Hmbox1)
BP	GO:0048878	chemical homeostasis	5	990	0.26693	0.42011	MGP_C57BL6NJ_G0021322(Il6st),MGP_C57BL6NJ_G0021587(Ptger2),MGP_C57BL6NJ_G0021900(Adra1a),MGP_C57BL6NJ_G0033450(Prkcb),MGP_C57BL6NJ_G0036487(Abcb7)
BP	GO:0009966	regulation of signal transduction	11	2527	0.2679	0.421309	MGP_C57BL6NJ_G0016210(St18),MGP_C57BL6NJ_G0016617(Pid1),MGP_C57BL6NJ_G0021322(Il6st),MGP_C57BL6NJ_G0021900(Adra1a),MGP_C57BL6NJ_G0022517(Mkl1),MGP_C57BL6NJ_G0024287(Plcl2),MGP_C57BL6NJ_G0024850(Csnk1g3),MGP_C57BL6NJ_G0026118(Dennd1a),MGP_C57BL6NJ_G0026135(Zeb2),MGP_C57BL6NJ_G0033450(Prkcb),MGP_C57BL6NJ_G0034792(Nrp1)
BP	GO:0009987	cellular process	51	13809	0.26807	0.421309	MGP_C57BL6NJ_G0016210(St18),MGP_C57BL6NJ_G0016429(Satb2),MGP_C57BL6NJ_G0016617(Pid1),MGP_C57BL6NJ_G0016967(Trove2),MGP_C57BL6NJ_G0016986(Fam129a),MGP_C57BL6NJ_G0017366(Cd34),MGP_C57BL6NJ_G0017454(Pde7b),MGP_C57BL6NJ_G0018428(Tns3),MGP_C57BL6NJ_G0019711(Pitpnc1),MGP_C57BL6NJ_G0020259(Gphn),MGP_C57BL6NJ_G0020351(Batf),MGP_C57BL6NJ_G0020402(Efcab11),MGP_C57BL6NJ_G0020849(Rreb1),MGP_C57BL6NJ_G0021322…
MF	GO:0004553	hydrolase activity, hydrolyzing O-glycosyl compounds	1	87	0.26818	0.421309	MGP_C57BL6NJ_G0028083(Man1a2)
BP	GO:0002040	sprouting angiogenesis	1	89	0.26939	0.422186	MGP_C57BL6NJ_G0034792(Nrp1)
BP	GO:0031532	actin cytoskeleton reorganization	1	89	0.26939	0.422186	MGP_C57BL6NJ_G0034792(Nrp1)
BP	GO:0042310	vasoconstriction	1	89	0.26939	0.422186	MGP_C57BL6NJ_G0021900(Adra1a)
BP	GO:0043534	blood vessel endothelial cell migration	1	89	0.26939	0.422186	MGP_C57BL6NJ_G0034792(Nrp1)
BP	GO:0007507	heart development	3	514	0.26979	0.422557	MGP_C57BL6NJ_G0021900(Adra1a),MGP_C57BL6NJ_G0024409(Myom1),MGP_C57BL6NJ_G0034792(Nrp1)
CC	GO:0099081	supramolecular polymer	4	766	0.2711	0.42341	MGP_C57BL6NJ_G0021900(Adra1a),MGP_C57BL6NJ_G0024409(Myom1),MGP_C57BL6NJ_G0031664(Mfap5),MGP_C57BL6NJ_G0034792(Nrp1)
BP	GO:0044271	cellular nitrogen compound biosynthetic process	16	3868	0.27122	0.42341	MGP_C57BL6NJ_G0016210(St18),MGP_C57BL6NJ_G0016429(Satb2),MGP_C57BL6NJ_G0016617(Pid1),MGP_C57BL6NJ_G0016986(Fam129a),MGP_C57BL6NJ_G0017366(Cd34),MGP_C57BL6NJ_G0020351(Batf),MGP_C57BL6NJ_G0020849(Rreb1),MGP_C57BL6NJ_G0021878(Hmbox1),MGP_C57BL6NJ_G0022517(Mkl1),MGP_C57BL6NJ_G0026135(Zeb2),MGP_C57BL6NJ_G0026261(Atp5g3),MGP_C57BL6NJ_G0032858(Klhl25),MGP_C57BL6NJ_G0033450(Prkcb),MGP_C57BL6NJ_G0035015(F…
BP	GO:0006897	endocytosis	3	516	0.2717	0.42341	MGP_C57BL6NJ_G0024850(Csnk1g3),MGP_C57BL6NJ_G0026118(Dennd1a),MGP_C57BL6NJ_G0026178(Cd302)
BP	GO:0080090	regulation of primary metabolic process	20	4957	0.27189	0.42341	MGP_C57BL6NJ_G0016210(St18),MGP_C57BL6NJ_G0016429(Satb2),MGP_C57BL6NJ_G0016617(Pid1),MGP_C57BL6NJ_G0016986(Fam129a),MGP_C57BL6NJ_G0020351(Batf),MGP_C57BL6NJ_G0020849(Rreb1),MGP_C57BL6NJ_G0021322(Il6st),MGP_C57BL6NJ_G0021878(Hmbox1),MGP_C57BL6NJ_G0021900(Adra1a),MGP_C57BL6NJ_G0021906(Ppp2r2a),MGP_C57BL6NJ_G0021963(Itm2b),MGP_C57BL6NJ_G0022517(Mkl1),MGP_C57BL6NJ_G0024287(Plcl2),MGP_C57BL6NJ_G002613…
CC	GO:0099080	supramolecular complex	4	767	0.2719	0.42341	MGP_C57BL6NJ_G0021900(Adra1a),MGP_C57BL6NJ_G0024409(Myom1),MGP_C57BL6NJ_G0031664(Mfap5),MGP_C57BL6NJ_G0034792(Nrp1)
BP	GO:0005976	polysaccharide metabolic process	1	90	0.27197	0.42341	MGP_C57BL6NJ_G0021322(Il6st)
BP	GO:0016064	immunoglobulin mediated immune response	1	90	0.27197	0.42341	MGP_C57BL6NJ_G0020351(Batf)
BP	GO:0048704	embryonic skeletal system morphogenesis	1	90	0.27197	0.42341	MGP_C57BL6NJ_G0016429(Satb2)
BP	GO:0071453	cellular response to oxygen levels	1	90	0.27197	0.42341	MGP_C57BL6NJ_G0017366(Cd34)
BP	GO:1903409	reactive oxygen species biosynthetic process	1	90	0.27197	0.42341	MGP_C57BL6NJ_G0017366(Cd34)
BP	GO:0051961	negative regulation of nervous system development	2	291	0.27235	0.423746	MGP_C57BL6NJ_G0022301(Asap1),MGP_C57BL6NJ_G0034792(Nrp1)
BP	GO:0051962	positive regulation of nervous system development	3	517	0.27265	0.423958	MGP_C57BL6NJ_G0021322(Il6st),MGP_C57BL6NJ_G0026135(Zeb2),MGP_C57BL6NJ_G0034792(Nrp1)
CC	GO:0030175	filopodium	1	92	0.2729	0.424092	MGP_C57BL6NJ_G0026178(Cd302)
BP	GO:0050767	regulation of neurogenesis	4	755	0.27328	0.424349	MGP_C57BL6NJ_G0021322(Il6st),MGP_C57BL6NJ_G0022301(Asap1),MGP_C57BL6NJ_G0026135(Zeb2),MGP_C57BL6NJ_G0034792(Nrp1)
MF	GO:0015078	hydrogen ion transmembrane transporter activity	1	89	0.27343	0.424349	MGP_C57BL6NJ_G0026261(Atp5g3)
BP	GO:1901214	regulation of neuron death	2	292	0.27366	0.424349	MGP_C57BL6NJ_G0017366(Cd34),MGP_C57BL6NJ_G0034792(Nrp1)
CC	GO:1903561	extracellular vesicle	9	2055	0.2741	0.424349	MGP_C57BL6NJ_G0016986(Fam129a),MGP_C57BL6NJ_G0020849(Rreb1),MGP_C57BL6NJ_G0021322(Il6st),MGP_C57BL6NJ_G0021963(Itm2b),MGP_C57BL6NJ_G0022940(Snx29),MGP_C57BL6NJ_G0024539(Rab18),MGP_C57BL6NJ_G0028083(Man1a2),MGP_C57BL6NJ_G0033450(Prkcb),MGP_C57BL6NJ_G0034283(Tmem38a)
BP	GO:0006641	triglyceride metabolic process	1	91	0.27454	0.424349	MGP_C57BL6NJ_G0021322(Il6st)
BP	GO:0015844	monoamine transport	1	91	0.27454	0.424349	MGP_C57BL6NJ_G0033450(Prkcb)
BP	GO:0019724	B cell mediated immunity	1	91	0.27454	0.424349	MGP_C57BL6NJ_G0020351(Batf)
BP	GO:0042476	odontogenesis	1	91	0.27454	0.424349	MGP_C57BL6NJ_G0017366(Cd34)
BP	GO:0060759	regulation of response to cytokine stimulus	1	91	0.27454	0.424349	MGP_C57BL6NJ_G0021322(Il6st)
BP	GO:0051094	positive regulation of developmental process	6	1251	0.27472	0.424374	MGP_C57BL6NJ_G0017366(Cd34),MGP_C57BL6NJ_G0020849(Rreb1),MGP_C57BL6NJ_G0021322(Il6st),MGP_C57BL6NJ_G0026135(Zeb2),MGP_C57BL6NJ_G0033450(Prkcb),MGP_C57BL6NJ_G0034792(Nrp1)
CC	GO:0000784	nuclear chromosome, telomeric region	1	93	0.2754	0.424917	MGP_C57BL6NJ_G0021878(Hmbox1)
CC	GO:0030136	clathrin-coated vesicle	1	93	0.2754	0.424917	MGP_C57BL6NJ_G0026118(Dennd1a)
CC	GO:0014069	postsynaptic density	2	299	0.2758	0.425281	MGP_C57BL6NJ_G0020259(Gphn),MGP_C57BL6NJ_G0029285(Epb41)
BP	GO:0071702	organic substance transport	10	2285	0.27702	0.42627	MGP_C57BL6NJ_G0016617(Pid1),MGP_C57BL6NJ_G0017366(Cd34),MGP_C57BL6NJ_G0019711(Pitpnc1),MGP_C57BL6NJ_G0024409(Myom1),MGP_C57BL6NJ_G0024426(Ehd3),MGP_C57BL6NJ_G0024539(Rab18),MGP_C57BL6NJ_G0026118(Dennd1a),MGP_C57BL6NJ_G0028496(Slc7a13),MGP_C57BL6NJ_G0030171(Cdkl2),MGP_C57BL6NJ_G0033450(Prkcb)
BP	GO:0001843	neural tube closure	1	92	0.2771	0.42627	MGP_C57BL6NJ_G0026135(Zeb2)
BP	GO:0006413	translational initiation	1	92	0.2771	0.42627	MGP_C57BL6NJ_G0032858(Klhl25)
BP	GO:2000045	regulation of G1/S transition of mitotic cell cycle	1	92	0.2771	0.42627	MGP_C57BL6NJ_G0016617(Pid1)
CC	GO:0043230	extracellular organelle	9	2062	0.2774	0.426478	MGP_C57BL6NJ_G0016986(Fam129a),MGP_C57BL6NJ_G0020849(Rreb1),MGP_C57BL6NJ_G0021322(Il6st),MGP_C57BL6NJ_G0021963(Itm2b),MGP_C57BL6NJ_G0022940(Snx29),MGP_C57BL6NJ_G0024539(Rab18),MGP_C57BL6NJ_G0028083(Man1a2),MGP_C57BL6NJ_G0033450(Prkcb),MGP_C57BL6NJ_G0034283(Tmem38a)
BP	GO:0044085	cellular component biogenesis	11	2550	0.27795	0.427047	MGP_C57BL6NJ_G0016967(Trove2),MGP_C57BL6NJ_G0017366(Cd34),MGP_C57BL6NJ_G0020259(Gphn),MGP_C57BL6NJ_G0020402(Efcab11),MGP_C57BL6NJ_G0022301(Asap1),MGP_C57BL6NJ_G0024409(Myom1),MGP_C57BL6NJ_G0024426(Ehd3),MGP_C57BL6NJ_G0025810(Pdss1),MGP_C57BL6NJ_G0028281(Ap1ar),MGP_C57BL6NJ_G0029285(Epb41),MGP_C57BL6NJ_G0034792(Nrp1)
CC	GO:0044427	chromosomal part	4	775	0.2781	0.427047	MGP_C57BL6NJ_G0016429(Satb2),MGP_C57BL6NJ_G0021878(Hmbox1),MGP_C57BL6NJ_G0022290(Nsmce2),MGP_C57BL6NJ_G0026135(Zeb2)
CC	GO:0032279	asymmetric synapse	2	302	0.2796	0.427904	MGP_C57BL6NJ_G0020259(Gphn),MGP_C57BL6NJ_G0029285(Epb41)
BP	GO:0002377	immunoglobulin production	1	93	0.27965	0.427904	MGP_C57BL6NJ_G0020351(Batf)
BP	GO:0043500	muscle adaptation	1	93	0.27965	0.427904	MGP_C57BL6NJ_G0021900(Adra1a)
BP	GO:0060606	tube closure	1	93	0.27965	0.427904	MGP_C57BL6NJ_G0026135(Zeb2)
BP	GO:0061053	somite development	1	93	0.27965	0.427904	MGP_C57BL6NJ_G0026135(Zeb2)
BP	GO:1905330	regulation of morphogenesis of an epithelium	1	93	0.27965	0.427904	MGP_C57BL6NJ_G0020849(Rreb1)
CC	GO:0030863	cortical cytoskeleton	1	95	0.2804	0.428798	MGP_C57BL6NJ_G0029285(Epb41)
BP	GO:0006259	DNA metabolic process	4	765	0.28115	0.429438	MGP_C57BL6NJ_G0016617(Pid1),MGP_C57BL6NJ_G0020351(Batf),MGP_C57BL6NJ_G0021878(Hmbox1),MGP_C57BL6NJ_G0022290(Nsmce2)
BP	GO:0030001	metal ion transport	4	765	0.28115	0.429438	MGP_C57BL6NJ_G0021900(Adra1a),MGP_C57BL6NJ_G0024426(Ehd3),MGP_C57BL6NJ_G0033450(Prkcb),MGP_C57BL6NJ_G0034283(Tmem38a)
BP	GO:0044772	mitotic cell cycle phase transition	2	298	0.28148	0.429466	MGP_C57BL6NJ_G0016617(Pid1),MGP_C57BL6NJ_G0022290(Nsmce2)
CC	GO:0071944	cell periphery	20	5078	0.2815	0.429466	MGP_C57BL6NJ_G0016986(Fam129a),MGP_C57BL6NJ_G0017366(Cd34),MGP_C57BL6NJ_G0019782(Armc7),MGP_C57BL6NJ_G0020259(Gphn),MGP_C57BL6NJ_G0021322(Il6st),MGP_C57BL6NJ_G0021587(Ptger2),MGP_C57BL6NJ_G0021900(Adra1a),MGP_C57BL6NJ_G0021963(Itm2b),MGP_C57BL6NJ_G0022301(Asap1),MGP_C57BL6NJ_G0024119(Olfr114),MGP_C57BL6NJ_G0024426(Ehd3),MGP_C57BL6NJ_G0024539(Rab18),MGP_C57BL6NJ_G0024850(Csnk1g3),MGP_C57BL6NJ_G002…
BP	GO:0000724	double-strand break repair via homologous recombination	1	94	0.2822	0.429774	MGP_C57BL6NJ_G0022290(Nsmce2)
BP	GO:0000725	recombinational repair	1	94	0.2822	0.429774	MGP_C57BL6NJ_G0022290(Nsmce2)
BP	GO:0021987	cerebral cortex development	1	94	0.2822	0.429774	MGP_C57BL6NJ_G0034792(Nrp1)
BP	GO:0031401	positive regulation of protein modification process	5	1013	0.2826	0.43013	MGP_C57BL6NJ_G0016986(Fam129a),MGP_C57BL6NJ_G0021322(Il6st),MGP_C57BL6NJ_G0021900(Adra1a),MGP_C57BL6NJ_G0026135(Zeb2),MGP_C57BL6NJ_G0034792(Nrp1)
CC	GO:0044853	plasma membrane raft	1	96	0.2829	0.430334	MGP_C57BL6NJ_G0021900(Adra1a)
CC	GO:0098984	neuron to neuron synapse	2	305	0.2835	0.430993	MGP_C57BL6NJ_G0020259(Gphn),MGP_C57BL6NJ_G0029285(Epb41)
BP	GO:0009116	nucleoside metabolic process	1	95	0.28473	0.432355	MGP_C57BL6NJ_G0020259(Gphn)
BP	GO:0097756	negative regulation of blood vessel diameter	1	95	0.28473	0.432355	MGP_C57BL6NJ_G0021900(Adra1a)
MF	GO:0016462	pyrophosphatase activity	4	757	0.28534	0.432612	MGP_C57BL6NJ_G0021924(Gm21685),MGP_C57BL6NJ_G0024539(Rab18),MGP_C57BL6NJ_G0026261(Atp5g3),MGP_C57BL6NJ_G0036487(Abcb7)
BP	GO:0051641	cellular localization	10	2303	0.28536	0.432612	MGP_C57BL6NJ_G0016617(Pid1),MGP_C57BL6NJ_G0020259(Gphn),MGP_C57BL6NJ_G0021900(Adra1a),MGP_C57BL6NJ_G0024426(Ehd3),MGP_C57BL6NJ_G0024539(Rab18),MGP_C57BL6NJ_G0026118(Dennd1a),MGP_C57BL6NJ_G0028281(Ap1ar),MGP_C57BL6NJ_G0029285(Epb41),MGP_C57BL6NJ_G0030171(Cdkl2),MGP_C57BL6NJ_G0034792(Nrp1)
CC	GO:0005814	centriole	1	97	0.2854	0.432612	MGP_C57BL6NJ_G0029745(Ccdc146)
BP	GO:0032411	positive regulation of transporter activity	1	96	0.28726	0.434474	MGP_C57BL6NJ_G0024426(Ehd3)
BP	GO:0048640	negative regulation of developmental growth	1	96	0.28726	0.434474	MGP_C57BL6NJ_G0034792(Nrp1)
BP	GO:1905039	carboxylic acid transmembrane transport	1	96	0.28726	0.434474	MGP_C57BL6NJ_G0028496(Slc7a13)
CC	GO:0044440	endosomal part	2	308	0.2873	0.434474	MGP_C57BL6NJ_G0021963(Itm2b),MGP_C57BL6NJ_G0024426(Ehd3)
MF	GO:0016818	hydrolase activity, acting on acid anhydrides, in phosphorus-containing anhydrides	4	760	0.28775	0.434901	MGP_C57BL6NJ_G0021924(Gm21685),MGP_C57BL6NJ_G0024539(Rab18),MGP_C57BL6NJ_G0026261(Atp5g3),MGP_C57BL6NJ_G0036487(Abcb7)
MF	GO:0016817	hydrolase activity, acting on acid anhydrides	4	762	0.28937	0.437094	MGP_C57BL6NJ_G0021924(Gm21685),MGP_C57BL6NJ_G0024539(Rab18),MGP_C57BL6NJ_G0026261(Atp5g3),MGP_C57BL6NJ_G0036487(Abcb7)
BP	GO:0046632	alpha-beta T cell differentiation	1	97	0.28977	0.437443	MGP_C57BL6NJ_G0020351(Batf)
BP	GO:0006812	cation transport	5	1024	0.29017	0.437791	MGP_C57BL6NJ_G0021900(Adra1a),MGP_C57BL6NJ_G0024426(Ehd3),MGP_C57BL6NJ_G0026261(Atp5g3),MGP_C57BL6NJ_G0033450(Prkcb),MGP_C57BL6NJ_G0034283(Tmem38a)
BP	GO:0044270	cellular nitrogen compound catabolic process	2	305	0.29061	0.4382	MGP_C57BL6NJ_G0017454(Pde7b),MGP_C57BL6NJ_G0035602(Syncrip)
MF	GO:0000980	RNA polymerase II distal enhancer sequence-specific DNA binding	1	96	0.29151	0.439301	MGP_C57BL6NJ_G0035015(Fli1)
BP	GO:0002253	activation of immune response	2	306	0.29191	0.439438	MGP_C57BL6NJ_G0024287(Plcl2),MGP_C57BL6NJ_G0033450(Prkcb)
BP	GO:0034332	adherens junction organization	1	98	0.29228	0.439438	MGP_C57BL6NJ_G0034792(Nrp1)
BP	GO:0034341	response to interferon-gamma	1	98	0.29228	0.439438	MGP_C57BL6NJ_G0035602(Syncrip)
BP	GO:0060996	dendritic spine development	1	98	0.29228	0.439438	MGP_C57BL6NJ_G0022301(Asap1)
CC	GO:0001650	fibrillar center	1	100	0.2928	0.43971	MGP_C57BL6NJ_G0020849(Rreb1)
CC	GO:0031234	extrinsic component of cytoplasmic side of plasma membrane	1	100	0.2928	0.43971	MGP_C57BL6NJ_G0020259(Gphn)
BP	GO:0046700	heterocycle catabolic process	2	307	0.29322	0.440085	MGP_C57BL6NJ_G0017454(Pde7b),MGP_C57BL6NJ_G0035602(Syncrip)
BP	GO:0051260	protein homooligomerization	2	308	0.29452	0.440384	MGP_C57BL6NJ_G0020259(Gphn),MGP_C57BL6NJ_G0024426(Ehd3)
BP	GO:0001775	cell activation	4	782	0.29462	0.440384	MGP_C57BL6NJ_G0020351(Batf),MGP_C57BL6NJ_G0021322(Il6st),MGP_C57BL6NJ_G0024287(Plcl2),MGP_C57BL6NJ_G0033450(Prkcb)
BP	GO:0006939	smooth muscle contraction	1	99	0.29478	0.440384	MGP_C57BL6NJ_G0021900(Adra1a)
BP	GO:0007034	vacuolar transport	1	99	0.29478	0.440384	MGP_C57BL6NJ_G0024426(Ehd3)
BP	GO:0014020	primary neural tube formation	1	99	0.29478	0.440384	MGP_C57BL6NJ_G0026135(Zeb2)
BP	GO:0031109	microtubule polymerization or depolymerization	1	99	0.29478	0.440384	MGP_C57BL6NJ_G0020402(Efcab11)
BP	GO:0051952	regulation of amine transport	1	99	0.29478	0.440384	MGP_C57BL6NJ_G0033450(Prkcb)
BP	GO:0061387	regulation of extent of cell growth	1	99	0.29478	0.440384	MGP_C57BL6NJ_G0034792(Nrp1)
BP	GO:1901652	response to peptide	2	310	0.29712	0.442317	MGP_C57BL6NJ_G0016617(Pid1),MGP_C57BL6NJ_G0033450(Prkcb)
BP	GO:0003073	regulation of systemic arterial blood pressure	1	100	0.29727	0.442317	MGP_C57BL6NJ_G0021900(Adra1a)
BP	GO:0007030	Golgi organization	1	100	0.29727	0.442317	MGP_C57BL6NJ_G0024426(Ehd3)
BP	GO:0043280	positive regulation of cysteine-type endopeptidase activity involved in apoptotic process	1	100	0.29727	0.442317	MGP_C57BL6NJ_G0016210(St18)
BP	GO:0045981	positive regulation of nucleotide metabolic process	1	100	0.29727	0.442317	MGP_C57BL6NJ_G0016617(Pid1)
BP	GO:1900544	positive regulation of purine nucleotide metabolic process	1	100	0.29727	0.442317	MGP_C57BL6NJ_G0016617(Pid1)
BP	GO:1901136	carbohydrate derivative catabolic process	1	100	0.29727	0.442317	MGP_C57BL6NJ_G0017454(Pde7b)
MF	GO:0042623	ATPase activity, coupled	2	305	0.29759	0.442344	MGP_C57BL6NJ_G0026261(Atp5g3),MGP_C57BL6NJ_G0036487(Abcb7)
BP	GO:0006412	translation	3	543	0.29763	0.442344	MGP_C57BL6NJ_G0016986(Fam129a),MGP_C57BL6NJ_G0032858(Klhl25),MGP_C57BL6NJ_G0035602(Syncrip)
BP	GO:1903827	regulation of cellular protein localization	3	544	0.29859	0.443517	MGP_C57BL6NJ_G0016617(Pid1),MGP_C57BL6NJ_G0029285(Epb41),MGP_C57BL6NJ_G0030171(Cdkl2)
BP	GO:0046434	organophosphate catabolic process	1	101	0.29975	0.444729	MGP_C57BL6NJ_G0017454(Pde7b)
BP	GO:1902600	hydrogen ion transmembrane transport	1	101	0.29975	0.444729	MGP_C57BL6NJ_G0026261(Atp5g3)
BP	GO:0071310	cellular response to organic substance	8	1811	0.30123	0.44651	MGP_C57BL6NJ_G0016210(St18),MGP_C57BL6NJ_G0016429(Satb2),MGP_C57BL6NJ_G0016617(Pid1),MGP_C57BL6NJ_G0021322(Il6st),MGP_C57BL6NJ_G0021587(Ptger2),MGP_C57BL6NJ_G0033450(Prkcb),MGP_C57BL6NJ_G0034792(Nrp1),MGP_C57BL6NJ_G0035602(Syncrip)
CC	GO:0009897	external side of plasma membrane	2	319	0.3014	0.44651	MGP_C57BL6NJ_G0017366(Cd34),MGP_C57BL6NJ_G0021322(Il6st)
BP	GO:1903047	mitotic cell cycle process	3	547	0.30149	0.44651	MGP_C57BL6NJ_G0016617(Pid1),MGP_C57BL6NJ_G0020402(Efcab11),MGP_C57BL6NJ_G0022290(Nsmce2)
BP	GO:0051092	positive regulation of NF-kappaB transcription factor activity	1	102	0.30223	0.44651	MGP_C57BL6NJ_G0033450(Prkcb)
BP	GO:1902806	regulation of cell cycle G1/S phase transition	1	102	0.30223	0.44651	MGP_C57BL6NJ_G0016617(Pid1)
BP	GO:0045595	regulation of cell differentiation	7	1553	0.30227	0.44651	MGP_C57BL6NJ_G0017366(Cd34),MGP_C57BL6NJ_G0020849(Rreb1),MGP_C57BL6NJ_G0021322(Il6st),MGP_C57BL6NJ_G0022301(Asap1),MGP_C57BL6NJ_G0026135(Zeb2),MGP_C57BL6NJ_G0028281(Ap1ar),MGP_C57BL6NJ_G0034792(Nrp1)
BP	GO:0032970	regulation of actin filament-based process	2	314	0.30233	0.44651	MGP_C57BL6NJ_G0028281(Ap1ar),MGP_C57BL6NJ_G0034792(Nrp1)
BP	GO:0060562	epithelial tube morphogenesis	2	314	0.30233	0.44651	MGP_C57BL6NJ_G0026135(Zeb2),MGP_C57BL6NJ_G0034792(Nrp1)
CC	GO:0099055	integral component of postsynaptic membrane	1	104	0.3026	0.446654	MGP_C57BL6NJ_G0021900(Adra1a)
BP	GO:0040012	regulation of locomotion	4	794	0.30418	0.44873	MGP_C57BL6NJ_G0020849(Rreb1),MGP_C57BL6NJ_G0021322(Il6st),MGP_C57BL6NJ_G0028281(Ap1ar),MGP_C57BL6NJ_G0034792(Nrp1)
BP	GO:0003279	cardiac septum development	1	103	0.30469	0.448971	MGP_C57BL6NJ_G0034792(Nrp1)
BP	GO:0097305	response to alcohol	1	103	0.30469	0.448971	MGP_C57BL6NJ_G0021587(Ptger2)
CC	GO:0098800	inner mitochondrial membrane protein complex	1	105	0.305	0.449172	MGP_C57BL6NJ_G0026261(Atp5g3)
CC	GO:0000790	nuclear chromatin	2	322	0.3052	0.449211	MGP_C57BL6NJ_G0016429(Satb2),MGP_C57BL6NJ_G0026135(Zeb2)
MF	GO:0001046	core promoter sequence-specific DNA binding	1	102	0.30665	0.450833	MGP_C57BL6NJ_G0020849(Rreb1)
MF	GO:0016298	lipase activity	1	102	0.30665	0.450833	MGP_C57BL6NJ_G0024287(Plcl2)
BP	GO:0006275	regulation of DNA replication	1	104	0.30715	0.451056	MGP_C57BL6NJ_G0016617(Pid1)
BP	GO:0030183	B cell differentiation	1	104	0.30715	0.451056	MGP_C57BL6NJ_G0024287(Plcl2)
BP	GO:0032270	positive regulation of cellular protein metabolic process	6	1304	0.30751	0.451328	MGP_C57BL6NJ_G0016210(St18),MGP_C57BL6NJ_G0016986(Fam129a),MGP_C57BL6NJ_G0021322(Il6st),MGP_C57BL6NJ_G0021900(Adra1a),MGP_C57BL6NJ_G0026135(Zeb2),MGP_C57BL6NJ_G0034792(Nrp1)
CC	GO:0099572	postsynaptic specialization	2	324	0.3078	0.451498	MGP_C57BL6NJ_G0020259(Gphn),MGP_C57BL6NJ_G0029285(Epb41)
BP	GO:0007200	phospholipase C-activating G-protein coupled receptor signaling pathway	1	105	0.3096	0.4526	MGP_C57BL6NJ_G0021900(Adra1a)
BP	GO:0017156	calcium ion regulated exocytosis	1	105	0.3096	0.4526	MGP_C57BL6NJ_G0021900(Adra1a)
BP	GO:0032273	positive regulation of protein polymerization	1	105	0.3096	0.4526	MGP_C57BL6NJ_G0028281(Ap1ar)
BP	GO:0045667	regulation of osteoblast differentiation	1	105	0.3096	0.4526	MGP_C57BL6NJ_G0021322(Il6st)
BP	GO:0045727	positive regulation of translation	1	105	0.3096	0.4526	MGP_C57BL6NJ_G0016986(Fam129a)
BP	GO:1903825	organic acid transmembrane transport	1	105	0.3096	0.4526	MGP_C57BL6NJ_G0028496(Slc7a13)
BP	GO:0019439	aromatic compound catabolic process	2	320	0.31012	0.452681	MGP_C57BL6NJ_G0017454(Pde7b),MGP_C57BL6NJ_G0035602(Syncrip)
BP	GO:0030098	lymphocyte differentiation	2	320	0.31012	0.452681	MGP_C57BL6NJ_G0020351(Batf),MGP_C57BL6NJ_G0024287(Plcl2)
BP	GO:0043043	peptide biosynthetic process	3	556	0.31018	0.452681	MGP_C57BL6NJ_G0016986(Fam129a),MGP_C57BL6NJ_G0032858(Klhl25),MGP_C57BL6NJ_G0035602(Syncrip)
BP	GO:0002250	adaptive immune response	2	321	0.31142	0.45386	MGP_C57BL6NJ_G0020351(Batf),MGP_C57BL6NJ_G0033450(Prkcb)
MF	GO:0047485	protein N-terminus binding	1	104	0.31162	0.45386	MGP_C57BL6NJ_G0029285(Epb41)
BP	GO:0015696	ammonium transport	1	106	0.31204	0.45386	MGP_C57BL6NJ_G0033450(Prkcb)
BP	GO:0015837	amine transport	1	106	0.31204	0.45386	MGP_C57BL6NJ_G0033450(Prkcb)
BP	GO:0030808	regulation of nucleotide biosynthetic process	1	106	0.31204	0.45386	MGP_C57BL6NJ_G0016617(Pid1)
BP	GO:1900371	regulation of purine nucleotide biosynthetic process	1	106	0.31204	0.45386	MGP_C57BL6NJ_G0016617(Pid1)
BP	GO:0051270	regulation of cellular component movement	4	806	0.31378	0.455879	MGP_C57BL6NJ_G0020849(Rreb1),MGP_C57BL6NJ_G0021322(Il6st),MGP_C57BL6NJ_G0028281(Ap1ar),MGP_C57BL6NJ_G0034792(Nrp1)
BP	GO:0045892	negative regulation of transcription, DNA-templated	5	1058	0.31378	0.455879	MGP_C57BL6NJ_G0016210(St18),MGP_C57BL6NJ_G0016429(Satb2),MGP_C57BL6NJ_G0020849(Rreb1),MGP_C57BL6NJ_G0021878(Hmbox1),MGP_C57BL6NJ_G0026135(Zeb2)
BP	GO:0051928	positive regulation of calcium ion transport	1	107	0.31447	0.456302	MGP_C57BL6NJ_G0024426(Ehd3)
BP	GO:0071322	cellular response to carbohydrate stimulus	1	107	0.31447	0.456302	MGP_C57BL6NJ_G0033450(Prkcb)
CC	GO:0005903	brush border	1	109	0.3146	0.456302	MGP_C57BL6NJ_G0033450(Prkcb)
CC	GO:0031981	nuclear lumen	12	2955	0.3154	0.457206	MGP_C57BL6NJ_G0016429(Satb2),MGP_C57BL6NJ_G0016967(Trove2),MGP_C57BL6NJ_G0020351(Batf),MGP_C57BL6NJ_G0020849(Rreb1),MGP_C57BL6NJ_G0021878(Hmbox1),MGP_C57BL6NJ_G0022290(Nsmce2),MGP_C57BL6NJ_G0022517(Mkl1),MGP_C57BL6NJ_G0026118(Dennd1a),MGP_C57BL6NJ_G0026135(Zeb2),MGP_C57BL6NJ_G0033450(Prkcb),MGP_C57BL6NJ_G0035015(Fli1),MGP_C57BL6NJ_G0035602(Syncrip)
MF	GO:0003705	transcription factor activity, RNA polymerase II distal enhancer sequence-specific binding	1	106	0.31656	0.457222	MGP_C57BL6NJ_G0026135(Zeb2)
MF	GO:0005088	Ras guanyl-nucleotide exchange factor activity	1	106	0.31656	0.457222	MGP_C57BL6NJ_G0026118(Dennd1a)
MF	GO:0022853	active ion transmembrane transporter activity	1	106	0.31656	0.457222	MGP_C57BL6NJ_G0026261(Atp5g3)
MF	GO:0035257	nuclear hormone receptor binding	1	106	0.31656	0.457222	MGP_C57BL6NJ_G0033450(Prkcb)
BP	GO:0044770	cell cycle phase transition	2	325	0.31661	0.457222	MGP_C57BL6NJ_G0016617(Pid1),MGP_C57BL6NJ_G0022290(Nsmce2)
BP	GO:0051186	cofactor metabolic process	2	325	0.31661	0.457222	MGP_C57BL6NJ_G0020259(Gphn),MGP_C57BL6NJ_G0025810(Pdss1)
BP	GO:0006639	acylglycerol metabolic process	1	108	0.31689	0.457222	MGP_C57BL6NJ_G0021322(Il6st)
BP	GO:0050709	negative regulation of protein secretion	1	108	0.31689	0.457222	MGP_C57BL6NJ_G0017366(Cd34)
CC	GO:0098936	intrinsic component of postsynaptic membrane	1	110	0.317	0.457222	MGP_C57BL6NJ_G0021900(Adra1a)
BP	GO:0070997	neuron death	2	326	0.3179	0.458265	MGP_C57BL6NJ_G0017366(Cd34),MGP_C57BL6NJ_G0034792(Nrp1)
BP	GO:0032501	multicellular organismal process	26	6758	0.31832	0.458615	MGP_C57BL6NJ_G0016429(Satb2),MGP_C57BL6NJ_G0016967(Trove2),MGP_C57BL6NJ_G0017366(Cd34),MGP_C57BL6NJ_G0018428(Tns3),MGP_C57BL6NJ_G0020351(Batf),MGP_C57BL6NJ_G0020849(Rreb1),MGP_C57BL6NJ_G0021322(Il6st),MGP_C57BL6NJ_G0021587(Ptger2),MGP_C57BL6NJ_G0021900(Adra1a),MGP_C57BL6NJ_G0021963(Itm2b),MGP_C57BL6NJ_G0022301(Asap1),MGP_C57BL6NJ_G0022517(Mkl1),MGP_C57BL6NJ_G0024119(Olfr114),MGP_C57BL6NJ_G0024287…
BP	GO:0010033	response to organic substance	10	2373	0.3185	0.458619	MGP_C57BL6NJ_G0016210(St18),MGP_C57BL6NJ_G0016429(Satb2),MGP_C57BL6NJ_G0016617(Pid1),MGP_C57BL6NJ_G0021322(Il6st),MGP_C57BL6NJ_G0021587(Ptger2),MGP_C57BL6NJ_G0021900(Adra1a),MGP_C57BL6NJ_G0021906(Ppp2r2a),MGP_C57BL6NJ_G0033450(Prkcb),MGP_C57BL6NJ_G0034792(Nrp1),MGP_C57BL6NJ_G0035602(Syncrip)
BP	GO:0001508	action potential	1	109	0.3193	0.45926	MGP_C57BL6NJ_G0021900(Adra1a)
BP	GO:0001935	endothelial cell proliferation	1	109	0.3193	0.45926	MGP_C57BL6NJ_G0017366(Cd34)
MF	GO:0000166	nucleotide binding	8	1814	0.3199	0.459573	MGP_C57BL6NJ_G0020259(Gphn),MGP_C57BL6NJ_G0021963(Itm2b),MGP_C57BL6NJ_G0024426(Ehd3),MGP_C57BL6NJ_G0024539(Rab18),MGP_C57BL6NJ_G0024850(Csnk1g3),MGP_C57BL6NJ_G0030171(Cdkl2),MGP_C57BL6NJ_G0033450(Prkcb),MGP_C57BL6NJ_G0036487(Abcb7)
MF	GO:1901265	nucleoside phosphate binding	8	1814	0.3199	0.459573	MGP_C57BL6NJ_G0020259(Gphn),MGP_C57BL6NJ_G0021963(Itm2b),MGP_C57BL6NJ_G0024426(Ehd3),MGP_C57BL6NJ_G0024539(Rab18),MGP_C57BL6NJ_G0024850(Csnk1g3),MGP_C57BL6NJ_G0030171(Cdkl2),MGP_C57BL6NJ_G0033450(Prkcb),MGP_C57BL6NJ_G0036487(Abcb7)
MF	GO:0015077	monovalent inorganic cation transmembrane transporter activity	2	322	0.32005	0.459573	MGP_C57BL6NJ_G0026261(Atp5g3),MGP_C57BL6NJ_G0034283(Tmem38a)
BP	GO:0003002	regionalization	2	328	0.32049	0.459695	MGP_C57BL6NJ_G0026135(Zeb2),MGP_C57BL6NJ_G0034792(Nrp1)
BP	GO:0032535	regulation of cellular component size	2	328	0.32049	0.459695	MGP_C57BL6NJ_G0028281(Ap1ar),MGP_C57BL6NJ_G0034792(Nrp1)
MF	GO:0016247	channel regulator activity	1	108	0.32147	0.459916	MGP_C57BL6NJ_G0033450(Prkcb)
MF	GO:0019955	cytokine binding	1	108	0.32147	0.459916	MGP_C57BL6NJ_G0021322(Il6st)
BP	GO:0006638	neutral lipid metabolic process	1	110	0.32171	0.459916	MGP_C57BL6NJ_G0021322(Il6st)
BP	GO:0009411	response to UV	1	110	0.32171	0.459916	MGP_C57BL6NJ_G0016967(Trove2)
BP	GO:0035304	regulation of protein dephosphorylation	1	110	0.32171	0.459916	MGP_C57BL6NJ_G0021906(Ppp2r2a)
BP	GO:0048675	axon extension	1	110	0.32171	0.459916	MGP_C57BL6NJ_G0034792(Nrp1)
BP	GO:0046488	phosphatidylinositol metabolic process	1	111	0.3241	0.462171	MGP_C57BL6NJ_G0019711(Pitpnc1)
BP	GO:0072089	stem cell proliferation	1	111	0.3241	0.462171	MGP_C57BL6NJ_G0017366(Cd34)
BP	GO:1903533	regulation of protein targeting	1	111	0.3241	0.462171	MGP_C57BL6NJ_G0030171(Cdkl2)
CC	GO:0034399	nuclear periphery	1	113	0.3241	0.462171	MGP_C57BL6NJ_G0016429(Satb2)
BP	GO:0009888	tissue development	7	1591	0.32418	0.462171	MGP_C57BL6NJ_G0016429(Satb2),MGP_C57BL6NJ_G0020849(Rreb1),MGP_C57BL6NJ_G0021900(Adra1a),MGP_C57BL6NJ_G0024409(Myom1),MGP_C57BL6NJ_G0026135(Zeb2),MGP_C57BL6NJ_G0034287(Large),MGP_C57BL6NJ_G0034792(Nrp1)
BP	GO:0050673	epithelial cell proliferation	2	331	0.32437	0.462187	MGP_C57BL6NJ_G0017366(Cd34),MGP_C57BL6NJ_G0020849(Rreb1)
BP	GO:0008284	positive regulation of cell proliferation	4	820	0.32502	0.462859	MGP_C57BL6NJ_G0016617(Pid1),MGP_C57BL6NJ_G0018428(Tns3),MGP_C57BL6NJ_G0020849(Rreb1),MGP_C57BL6NJ_G0021322(Il6st)
BP	GO:0007049	cell cycle	6	1333	0.32577	0.463672	MGP_C57BL6NJ_G0016617(Pid1),MGP_C57BL6NJ_G0020402(Efcab11),MGP_C57BL6NJ_G0021906(Ppp2r2a),MGP_C57BL6NJ_G0022290(Nsmce2),MGP_C57BL6NJ_G0029285(Epb41),MGP_C57BL6NJ_G0030171(Cdkl2)
BP	GO:0002244	hematopoietic progenitor cell differentiation	1	112	0.32649	0.463876	MGP_C57BL6NJ_G0020351(Batf)
BP	GO:1903305	regulation of regulated secretory pathway	1	112	0.32649	0.463876	MGP_C57BL6NJ_G0021900(Adra1a)
BP	GO:0120039	plasma membrane bounded cell projection morphogenesis	3	573	0.32663	0.463876	MGP_C57BL6NJ_G0020849(Rreb1),MGP_C57BL6NJ_G0026135(Zeb2),MGP_C57BL6NJ_G0034792(Nrp1)
BP	GO:0032940	secretion by cell	4	822	0.32663	0.463876	MGP_C57BL6NJ_G0017366(Cd34),MGP_C57BL6NJ_G0021900(Adra1a),MGP_C57BL6NJ_G0024409(Myom1),MGP_C57BL6NJ_G0033450(Prkcb)
BP	GO:0030099	myeloid cell differentiation	2	333	0.32696	0.46409	MGP_C57BL6NJ_G0020351(Batf),MGP_C57BL6NJ_G0035015(Fli1)
CC	GO:0044420	extracellular matrix component	1	115	0.3287	0.464762	MGP_C57BL6NJ_G0031664(Mfap5)
MF	GO:0005201	extracellular matrix structural constituent	1	111	0.32876	0.464762	MGP_C57BL6NJ_G0031664(Mfap5)
MF	GO:0016798	hydrolase activity, acting on glycosyl bonds	1	111	0.32876	0.464762	MGP_C57BL6NJ_G0028083(Man1a2)
BP	GO:0006261	DNA-dependent DNA replication	1	113	0.32887	0.464762	MGP_C57BL6NJ_G0016617(Pid1)
BP	GO:0033135	regulation of peptidyl-serine phosphorylation	1	113	0.32887	0.464762	MGP_C57BL6NJ_G0024287(Plcl2)
BP	GO:0035637	multicellular organismal signaling	1	113	0.32887	0.464762	MGP_C57BL6NJ_G0024426(Ehd3)
BP	GO:0046058	cAMP metabolic process	1	113	0.32887	0.464762	MGP_C57BL6NJ_G0017454(Pde7b)
BP	GO:0050921	positive regulation of chemotaxis	1	113	0.32887	0.464762	MGP_C57BL6NJ_G0034792(Nrp1)
BP	GO:1903507	negative regulation of nucleic acid-templated transcription	5	1081	0.32993	0.466006	MGP_C57BL6NJ_G0016210(St18),MGP_C57BL6NJ_G0016429(Satb2),MGP_C57BL6NJ_G0020849(Rreb1),MGP_C57BL6NJ_G0021878(Hmbox1),MGP_C57BL6NJ_G0026135(Zeb2)
BP	GO:0048858	cell projection morphogenesis	3	577	0.3305	0.46609	MGP_C57BL6NJ_G0020849(Rreb1),MGP_C57BL6NJ_G0026135(Zeb2),MGP_C57BL6NJ_G0034792(Nrp1)
BP	GO:1902679	negative regulation of RNA biosynthetic process	5	1082	0.33063	0.46609	MGP_C57BL6NJ_G0016210(St18),MGP_C57BL6NJ_G0016429(Satb2),MGP_C57BL6NJ_G0020849(Rreb1),MGP_C57BL6NJ_G0021878(Hmbox1),MGP_C57BL6NJ_G0026135(Zeb2)
CC	GO:0005798	Golgi-associated vesicle	1	116	0.3311	0.46609	MGP_C57BL6NJ_G0021963(Itm2b)
BP	GO:0001841	neural tube formation	1	114	0.33125	0.46609	MGP_C57BL6NJ_G0026135(Zeb2)
BP	GO:0055076	transition metal ion homeostasis	1	114	0.33125	0.46609	MGP_C57BL6NJ_G0036487(Abcb7)
BP	GO:0072331	signal transduction by p53 class mediator	1	114	0.33125	0.46609	MGP_C57BL6NJ_G0020351(Batf)
BP	GO:2001056	positive regulation of cysteine-type endopeptidase activity	1	114	0.33125	0.46609	MGP_C57BL6NJ_G0016210(St18)
CC	GO:0099568	cytoplasmic region	2	343	0.3319	0.466751	MGP_C57BL6NJ_G0026178(Cd302),MGP_C57BL6NJ_G0029285(Epb41)
BP	GO:0048583	regulation of response to stimulus	13	3211	0.33251	0.467355	MGP_C57BL6NJ_G0016210(St18),MGP_C57BL6NJ_G0016617(Pid1),MGP_C57BL6NJ_G0017366(Cd34),MGP_C57BL6NJ_G0020849(Rreb1),MGP_C57BL6NJ_G0021322(Il6st),MGP_C57BL6NJ_G0021900(Adra1a),MGP_C57BL6NJ_G0022517(Mkl1),MGP_C57BL6NJ_G0024287(Plcl2),MGP_C57BL6NJ_G0024850(Csnk1g3),MGP_C57BL6NJ_G0026118(Dennd1a),MGP_C57BL6NJ_G0026135(Zeb2),MGP_C57BL6NJ_G0033450(Prkcb),MGP_C57BL6NJ_G0034792(Nrp1)
MF	GO:0005525	GTP binding	2	332	0.3332	0.467885	MGP_C57BL6NJ_G0024426(Ehd3),MGP_C57BL6NJ_G0024539(Rab18)
BP	GO:1903829	positive regulation of cellular protein localization	2	338	0.33341	0.467885	MGP_C57BL6NJ_G0029285(Epb41),MGP_C57BL6NJ_G0030171(Cdkl2)
BP	GO:0031099	regeneration	1	115	0.33361	0.467885	MGP_C57BL6NJ_G0034287(Large)
BP	GO:0050715	positive regulation of cytokine secretion	1	115	0.33361	0.467885	MGP_C57BL6NJ_G0017366(Cd34)
BP	GO:0098657	import into cell	3	581	0.33438	0.468711	MGP_C57BL6NJ_G0024850(Csnk1g3),MGP_C57BL6NJ_G0026118(Dennd1a),MGP_C57BL6NJ_G0026178(Cd302)
BP	GO:0002792	negative regulation of peptide secretion	1	116	0.33597	0.469669	MGP_C57BL6NJ_G0017366(Cd34)
BP	GO:0008037	cell recognition	1	116	0.33597	0.469669	MGP_C57BL6NJ_G0034792(Nrp1)
BP	GO:0031023	microtubule organizing center organization	1	116	0.33597	0.469669	MGP_C57BL6NJ_G0020402(Efcab11)
BP	GO:0046330	positive regulation of JNK cascade	1	116	0.33597	0.469669	MGP_C57BL6NJ_G0026135(Zeb2)
BP	GO:1901657	glycosyl compound metabolic process	1	116	0.33597	0.469669	MGP_C57BL6NJ_G0020259(Gphn)
BP	GO:0007517	muscle organ development	2	341	0.33727	0.471232	MGP_C57BL6NJ_G0024409(Myom1),MGP_C57BL6NJ_G0034287(Large)
BP	GO:0006338	chromatin remodeling	1	117	0.33831	0.472001	MGP_C57BL6NJ_G0016429(Satb2)
BP	GO:0032680	regulation of tumor necrosis factor production	1	117	0.33831	0.472001	MGP_C57BL6NJ_G0017366(Cd34)
MF	GO:0032550	purine ribonucleoside binding	2	336	0.33843	0.472001	MGP_C57BL6NJ_G0024426(Ehd3),MGP_C57BL6NJ_G0024539(Rab18)
BP	GO:0052548	regulation of endopeptidase activity	2	342	0.33855	0.472001	MGP_C57BL6NJ_G0016210(St18),MGP_C57BL6NJ_G0022517(Mkl1)
BP	GO:0001558	regulation of cell growth	2	343	0.33984	0.473545	MGP_C57BL6NJ_G0029285(Epb41),MGP_C57BL6NJ_G0034792(Nrp1)
CC	GO:0098796	membrane protein complex	3	598	0.3405	0.474047	MGP_C57BL6NJ_G0017366(Cd34),MGP_C57BL6NJ_G0019782(Armc7),MGP_C57BL6NJ_G0026261(Atp5g3)
BP	GO:0014013	regulation of gliogenesis	1	118	0.34065	0.474047	MGP_C57BL6NJ_G0021322(Il6st)
MF	GO:0001158	enhancer sequence-specific DNA binding	1	116	0.34075	0.474047	MGP_C57BL6NJ_G0035015(Fli1)
BP	GO:0016055	Wnt signaling pathway	2	344	0.34112	0.474052	MGP_C57BL6NJ_G0024850(Csnk1g3),MGP_C57BL6NJ_G0026135(Zeb2)
BP	GO:0051052	regulation of DNA metabolic process	2	344	0.34112	0.474052	MGP_C57BL6NJ_G0016617(Pid1),MGP_C57BL6NJ_G0021878(Hmbox1)
CC	GO:0097458	neuron part	7	1651	0.3419	0.474286	MGP_C57BL6NJ_G0020259(Gphn),MGP_C57BL6NJ_G0021322(Il6st),MGP_C57BL6NJ_G0021900(Adra1a),MGP_C57BL6NJ_G0022301(Asap1),MGP_C57BL6NJ_G0026118(Dennd1a),MGP_C57BL6NJ_G0029285(Epb41),MGP_C57BL6NJ_G0034792(Nrp1)
BP	GO:0019221	cytokine-mediated signaling pathway	2	345	0.34241	0.474286	MGP_C57BL6NJ_G0016210(St18),MGP_C57BL6NJ_G0021322(Il6st)
BP	GO:1901361	organic cyclic compound catabolic process	2	345	0.34241	0.474286	MGP_C57BL6NJ_G0017454(Pde7b),MGP_C57BL6NJ_G0035602(Syncrip)
BP	GO:0032640	tumor necrosis factor production	1	119	0.34298	0.474286	MGP_C57BL6NJ_G0017366(Cd34)
BP	GO:0042787	protein ubiquitination involved in ubiquitin-dependent protein catabolic process	1	119	0.34298	0.474286	MGP_C57BL6NJ_G0032858(Klhl25)
BP	GO:0048706	embryonic skeletal system development	1	119	0.34298	0.474286	MGP_C57BL6NJ_G0016429(Satb2)
BP	GO:0050671	positive regulation of lymphocyte proliferation	1	119	0.34298	0.474286	MGP_C57BL6NJ_G0021322(Il6st)
BP	GO:1903555	regulation of tumor necrosis factor superfamily cytokine production	1	119	0.34298	0.474286	MGP_C57BL6NJ_G0017366(Cd34)
BP	GO:0001568	blood vessel development	3	590	0.34309	0.474286	MGP_C57BL6NJ_G0017366(Cd34),MGP_C57BL6NJ_G0033450(Prkcb),MGP_C57BL6NJ_G0034792(Nrp1)
MF	GO:0008201	heparin binding	1	117	0.34312	0.474286	MGP_C57BL6NJ_G0034792(Nrp1)
MF	GO:0001883	purine nucleoside binding	2	340	0.34366	0.474567	MGP_C57BL6NJ_G0024426(Ehd3),MGP_C57BL6NJ_G0024539(Rab18)
BP	GO:0198738	cell-cell signaling by wnt	2	346	0.34369	0.474567	MGP_C57BL6NJ_G0024850(Csnk1g3),MGP_C57BL6NJ_G0026135(Zeb2)
BP	GO:0048699	generation of neurons	6	1362	0.34421	0.475032	MGP_C57BL6NJ_G0016429(Satb2),MGP_C57BL6NJ_G0021322(Il6st),MGP_C57BL6NJ_G0022301(Asap1),MGP_C57BL6NJ_G0022517(Mkl1),MGP_C57BL6NJ_G0026135(Zeb2),MGP_C57BL6NJ_G0034792(Nrp1)
MF	GO:0032549	ribonucleoside binding	2	341	0.34497	0.475827	MGP_C57BL6NJ_G0024426(Ehd3),MGP_C57BL6NJ_G0024539(Rab18)
BP	GO:0010594	regulation of endothelial cell migration	1	120	0.34531	0.476042	MGP_C57BL6NJ_G0034792(Nrp1)
BP	GO:0040008	regulation of growth	3	593	0.346	0.476577	MGP_C57BL6NJ_G0029285(Epb41),MGP_C57BL6NJ_G0033450(Prkcb),MGP_C57BL6NJ_G0034792(Nrp1)
BP	GO:0035239	tube morphogenesis	2	348	0.34625	0.476577	MGP_C57BL6NJ_G0026135(Zeb2),MGP_C57BL6NJ_G0034792(Nrp1)
BP	GO:0043254	regulation of protein complex assembly	2	348	0.34625	0.476577	MGP_C57BL6NJ_G0022301(Asap1),MGP_C57BL6NJ_G0028281(Ap1ar)
CC	GO:0120025	plasma membrane bounded cell projection	8	1931	0.3473	0.477194	MGP_C57BL6NJ_G0020259(Gphn),MGP_C57BL6NJ_G0021322(Il6st),MGP_C57BL6NJ_G0022301(Asap1),MGP_C57BL6NJ_G0024426(Ehd3),MGP_C57BL6NJ_G0026118(Dennd1a),MGP_C57BL6NJ_G0026178(Cd302),MGP_C57BL6NJ_G0033450(Prkcb),MGP_C57BL6NJ_G0034792(Nrp1)
BP	GO:0010822	positive regulation of mitochondrion organization	1	121	0.34762	0.477194	MGP_C57BL6NJ_G0030171(Cdkl2)
BP	GO:0032946	positive regulation of mononuclear cell proliferation	1	121	0.34762	0.477194	MGP_C57BL6NJ_G0021322(Il6st)
BP	GO:0034250	positive regulation of cellular amide metabolic process	1	121	0.34762	0.477194	MGP_C57BL6NJ_G0016986(Fam129a)
BP	GO:0060041	retina development in camera-type eye	1	121	0.34762	0.477194	MGP_C57BL6NJ_G0034792(Nrp1)
BP	GO:0030856	regulation of epithelial cell differentiation	1	122	0.34993	0.479602	MGP_C57BL6NJ_G0026135(Zeb2)
BP	GO:0071706	tumor necrosis factor superfamily cytokine production	1	122	0.34993	0.479602	MGP_C57BL6NJ_G0017366(Cd34)
BP	GO:1904064	positive regulation of cation transmembrane transport	1	122	0.34993	0.479602	MGP_C57BL6NJ_G0024426(Ehd3)
CC	GO:0005743	mitochondrial inner membrane	2	359	0.3521	0.481636	MGP_C57BL6NJ_G0026261(Atp5g3),MGP_C57BL6NJ_G0036487(Abcb7)
BP	GO:0006626	protein targeting to mitochondrion	1	123	0.35223	0.481636	MGP_C57BL6NJ_G0030171(Cdkl2)
BP	GO:0022612	gland morphogenesis	1	123	0.35223	0.481636	MGP_C57BL6NJ_G0034792(Nrp1)
MF	GO:0005267	potassium channel activity	1	121	0.35253	0.481636	MGP_C57BL6NJ_G0034283(Tmem38a)
MF	GO:0005319	lipid transporter activity	1	121	0.35253	0.481636	MGP_C57BL6NJ_G0019711(Pitpnc1)
MF	GO:0070851	growth factor receptor binding	1	121	0.35253	0.481636	MGP_C57BL6NJ_G0021322(Il6st)
BP	GO:0051960	regulation of nervous system development	4	855	0.35326	0.482379	MGP_C57BL6NJ_G0021322(Il6st),MGP_C57BL6NJ_G0022301(Asap1),MGP_C57BL6NJ_G0026135(Zeb2),MGP_C57BL6NJ_G0034792(Nrp1)
CC	GO:0005694	chromosome	4	872	0.3544	0.483335	MGP_C57BL6NJ_G0016429(Satb2),MGP_C57BL6NJ_G0021878(Hmbox1),MGP_C57BL6NJ_G0022290(Nsmce2),MGP_C57BL6NJ_G0026135(Zeb2)
BP	GO:0007269	neurotransmitter secretion	1	124	0.35452	0.483335	MGP_C57BL6NJ_G0021900(Adra1a)
BP	GO:0099643	signal release from synapse	1	124	0.35452	0.483335	MGP_C57BL6NJ_G0021900(Adra1a)
MF	GO:0001882	nucleoside binding	2	349	0.35538	0.484252	MGP_C57BL6NJ_G0024426(Ehd3),MGP_C57BL6NJ_G0024539(Rab18)
MF	GO:0019001	guanyl nucleotide binding	2	350	0.35667	0.484573	MGP_C57BL6NJ_G0024426(Ehd3),MGP_C57BL6NJ_G0024539(Rab18)
MF	GO:0032561	guanyl ribonucleotide binding	2	350	0.35667	0.484573	MGP_C57BL6NJ_G0024426(Ehd3),MGP_C57BL6NJ_G0024539(Rab18)
BP	GO:0003206	cardiac chamber morphogenesis	1	125	0.3568	0.484573	MGP_C57BL6NJ_G0034792(Nrp1)
BP	GO:0015992	proton transport	1	125	0.3568	0.484573	MGP_C57BL6NJ_G0026261(Atp5g3)
BP	GO:0051291	protein heterooligomerization	1	125	0.3568	0.484573	MGP_C57BL6NJ_G0025810(Pdss1)
BP	GO:0070665	positive regulation of leukocyte proliferation	1	125	0.3568	0.484573	MGP_C57BL6NJ_G0021322(Il6st)
MF	GO:0035326	enhancer binding	1	123	0.35718	0.484573	MGP_C57BL6NJ_G0035015(Fli1)
MF	GO:0036094	small molecule binding	9	2145	0.3572	0.484573	MGP_C57BL6NJ_G0020259(Gphn),MGP_C57BL6NJ_G0021963(Itm2b),MGP_C57BL6NJ_G0024287(Plcl2),MGP_C57BL6NJ_G0024426(Ehd3),MGP_C57BL6NJ_G0024539(Rab18),MGP_C57BL6NJ_G0024850(Csnk1g3),MGP_C57BL6NJ_G0030171(Cdkl2),MGP_C57BL6NJ_G0033450(Prkcb),MGP_C57BL6NJ_G0036487(Abcb7)
BP	GO:0060341	regulation of cellular localization	4	860	0.3573	0.484573	MGP_C57BL6NJ_G0016617(Pid1),MGP_C57BL6NJ_G0021900(Adra1a),MGP_C57BL6NJ_G0029285(Epb41),MGP_C57BL6NJ_G0030171(Cdkl2)
BP	GO:0014706	striated muscle tissue development	2	358	0.35903	0.486223	MGP_C57BL6NJ_G0021900(Adra1a),MGP_C57BL6NJ_G0024409(Myom1)
BP	GO:0006818	hydrogen transport	1	126	0.35908	0.486223	MGP_C57BL6NJ_G0026261(Atp5g3)
BP	GO:0051053	negative regulation of DNA metabolic process	1	126	0.35908	0.486223	MGP_C57BL6NJ_G0016617(Pid1)
BP	GO:0000070	mitotic sister chromatid segregation	1	127	0.36134	0.488772	MGP_C57BL6NJ_G0022290(Nsmce2)
BP	GO:0007224	smoothened signaling pathway	1	127	0.36134	0.488772	MGP_C57BL6NJ_G0016967(Trove2)
BP	GO:0045666	positive regulation of neuron differentiation	2	360	0.36157	0.488828	MGP_C57BL6NJ_G0026135(Zeb2),MGP_C57BL6NJ_G0034792(Nrp1)
CC	GO:0045177	apical part of cell	2	367	0.3621	0.489289	MGP_C57BL6NJ_G0017366(Cd34),MGP_C57BL6NJ_G0024539(Rab18)
CC	GO:0098798	mitochondrial protein complex	1	130	0.3629	0.490114	MGP_C57BL6NJ_G0026261(Atp5g3)
BP	GO:0051247	positive regulation of protein metabolic process	6	1392	0.36342	0.49056	MGP_C57BL6NJ_G0016210(St18),MGP_C57BL6NJ_G0016986(Fam129a),MGP_C57BL6NJ_G0021322(Il6st),MGP_C57BL6NJ_G0021900(Adra1a),MGP_C57BL6NJ_G0026135(Zeb2),MGP_C57BL6NJ_G0034792(Nrp1)
MF	GO:0004713	protein tyrosine kinase activity	1	126	0.36409	0.490953	MGP_C57BL6NJ_G0034792(Nrp1)
MF	GO:0051427	hormone receptor binding	1	126	0.36409	0.490953	MGP_C57BL6NJ_G0033450(Prkcb)
CC	GO:0055037	recycling endosome	1	131	0.3651	0.491668	MGP_C57BL6NJ_G0024426(Ehd3)
BP	GO:0001944	vasculature development	3	613	0.36533	0.491668	MGP_C57BL6NJ_G0017366(Cd34),MGP_C57BL6NJ_G0033450(Prkcb),MGP_C57BL6NJ_G0034792(Nrp1)
BP	GO:0045664	regulation of neuron differentiation	3	613	0.36533	0.491668	MGP_C57BL6NJ_G0022301(Asap1),MGP_C57BL6NJ_G0026135(Zeb2),MGP_C57BL6NJ_G0034792(Nrp1)
BP	GO:1903532	positive regulation of secretion by cell	2	363	0.36538	0.491668	MGP_C57BL6NJ_G0017366(Cd34),MGP_C57BL6NJ_G0024409(Myom1)
BP	GO:0010950	positive regulation of endopeptidase activity	1	129	0.36585	0.492044	MGP_C57BL6NJ_G0016210(St18)
BP	GO:0060548	negative regulation of cell death	4	871	0.36619	0.492246	MGP_C57BL6NJ_G0017366(Cd34),MGP_C57BL6NJ_G0022517(Mkl1),MGP_C57BL6NJ_G0026714(Aven),MGP_C57BL6NJ_G0034792(Nrp1)
BP	GO:0008152	metabolic process	35	9445	0.36711	0.493227	MGP_C57BL6NJ_G0016210(St18),MGP_C57BL6NJ_G0016429(Satb2),MGP_C57BL6NJ_G0016617(Pid1),MGP_C57BL6NJ_G0016986(Fam129a),MGP_C57BL6NJ_G0017366(Cd34),MGP_C57BL6NJ_G0017454(Pde7b),MGP_C57BL6NJ_G0019711(Pitpnc1),MGP_C57BL6NJ_G0020259(Gphn),MGP_C57BL6NJ_G0020351(Batf),MGP_C57BL6NJ_G0020849(Rreb1),MGP_C57BL6NJ_G0021322(Il6st),MGP_C57BL6NJ_G0021878(Hmbox1),MGP_C57BL6NJ_G0021900(Adra1a),MGP_C57BL6NJ_G0021906…
BP	GO:0030879	mammary gland development	1	130	0.3681	0.494044	MGP_C57BL6NJ_G0020849(Rreb1)
BP	GO:0046631	alpha-beta T cell activation	1	130	0.3681	0.494044	MGP_C57BL6NJ_G0020351(Batf)
BP	GO:0050804	modulation of chemical synaptic transmission	2	366	0.36918	0.494994	MGP_C57BL6NJ_G0021900(Adra1a),MGP_C57BL6NJ_G0024287(Plcl2)
BP	GO:0043408	regulation of MAPK cascade	3	617	0.36919	0.494994	MGP_C57BL6NJ_G0021900(Adra1a),MGP_C57BL6NJ_G0026135(Zeb2),MGP_C57BL6NJ_G0034792(Nrp1)
CC	GO:0099699	integral component of synaptic membrane	1	133	0.3695	0.495153	MGP_C57BL6NJ_G0021900(Adra1a)
BP	GO:0051017	actin filament bundle assembly	1	131	0.37033	0.495752	MGP_C57BL6NJ_G0034792(Nrp1)
BP	GO:2001236	regulation of extrinsic apoptotic signaling pathway	1	131	0.37033	0.495752	MGP_C57BL6NJ_G0034792(Nrp1)
MF	GO:0017137	Rab GTPase binding	1	129	0.37094	0.496312	MGP_C57BL6NJ_G0026118(Dennd1a)
BP	GO:0045184	establishment of protein localization	7	1671	0.37118	0.496377	MGP_C57BL6NJ_G0017366(Cd34),MGP_C57BL6NJ_G0020259(Gphn),MGP_C57BL6NJ_G0024409(Myom1),MGP_C57BL6NJ_G0024426(Ehd3),MGP_C57BL6NJ_G0024539(Rab18),MGP_C57BL6NJ_G0026118(Dennd1a),MGP_C57BL6NJ_G0030171(Cdkl2)
BP	GO:0007155	cell adhesion	5	1140	0.37172	0.49681	MGP_C57BL6NJ_G0017366(Cd34),MGP_C57BL6NJ_G0020849(Rreb1),MGP_C57BL6NJ_G0021322(Il6st),MGP_C57BL6NJ_G0028281(Ap1ar),MGP_C57BL6NJ_G0034792(Nrp1)
BP	GO:0071705	nitrogen compound transport	8	1941	0.37196	0.49681	MGP_C57BL6NJ_G0017366(Cd34),MGP_C57BL6NJ_G0024409(Myom1),MGP_C57BL6NJ_G0024426(Ehd3),MGP_C57BL6NJ_G0024539(Rab18),MGP_C57BL6NJ_G0026118(Dennd1a),MGP_C57BL6NJ_G0028496(Slc7a13),MGP_C57BL6NJ_G0030171(Cdkl2),MGP_C57BL6NJ_G0033450(Prkcb)
BP	GO:0043604	amide biosynthetic process	3	620	0.37208	0.49681	MGP_C57BL6NJ_G0016986(Fam129a),MGP_C57BL6NJ_G0032858(Klhl25),MGP_C57BL6NJ_G0035602(Syncrip)
BP	GO:0042127	regulation of cell proliferation	6	1406	0.37241	0.496939	MGP_C57BL6NJ_G0016210(St18),MGP_C57BL6NJ_G0016617(Pid1),MGP_C57BL6NJ_G0018428(Tns3),MGP_C57BL6NJ_G0020849(Rreb1),MGP_C57BL6NJ_G0021322(Il6st),MGP_C57BL6NJ_G0021587(Ptger2)
BP	GO:0099531	presynaptic process involved in chemical synaptic transmission	1	132	0.37256	0.496939	MGP_C57BL6NJ_G0021900(Adra1a)
MF	GO:0001076	transcription factor activity, RNA polymerase II transcription factor binding	1	130	0.3732	0.49728	MGP_C57BL6NJ_G0022517(Mkl1)
MF	GO:0008194	UDP-glycosyltransferase activity	1	130	0.3732	0.49728	MGP_C57BL6NJ_G0034287(Large)
BP	GO:0052547	regulation of peptidase activity	2	370	0.37424	0.498409	MGP_C57BL6NJ_G0016210(St18),MGP_C57BL6NJ_G0022517(Mkl1)
BP	GO:0051262	protein tetramerization	1	133	0.37478	0.498872	MGP_C57BL6NJ_G0025810(Pdss1)
BP	GO:0050708	regulation of protein secretion	2	371	0.3755	0.499317	MGP_C57BL6NJ_G0017366(Cd34),MGP_C57BL6NJ_G0024409(Myom1)
BP	GO:0060537	muscle tissue development	2	371	0.3755	0.499317	MGP_C57BL6NJ_G0021900(Adra1a),MGP_C57BL6NJ_G0024409(Myom1)
BP	GO:0031175	neuron projection development	4	884	0.3767	0.499758	MGP_C57BL6NJ_G0022301(Asap1),MGP_C57BL6NJ_G0022517(Mkl1),MGP_C57BL6NJ_G0026135(Zeb2),MGP_C57BL6NJ_G0034792(Nrp1)
BP	GO:0072358	cardiovascular system development	3	625	0.37689	0.499758	MGP_C57BL6NJ_G0017366(Cd34),MGP_C57BL6NJ_G0033450(Prkcb),MGP_C57BL6NJ_G0034792(Nrp1)
BP	GO:0030833	regulation of actin filament polymerization	1	134	0.37699	0.499758	MGP_C57BL6NJ_G0028281(Ap1ar)
BP	GO:0034767	positive regulation of ion transmembrane transport	1	134	0.37699	0.499758	MGP_C57BL6NJ_G0024426(Ehd3)
BP	GO:0043123	positive regulation of I-kappaB kinase/NF-kappaB signaling	1	134	0.37699	0.499758	MGP_C57BL6NJ_G0033450(Prkcb)
BP	GO:0061572	actin filament bundle organization	1	134	0.37699	0.499758	MGP_C57BL6NJ_G0034792(Nrp1)
MF	GO:0046943	carboxylic acid transmembrane transporter activity	1	132	0.37771	0.500456	MGP_C57BL6NJ_G0028496(Slc7a13)
BP	GO:0022610	biological adhesion	5	1149	0.37812	0.500637	MGP_C57BL6NJ_G0017366(Cd34),MGP_C57BL6NJ_G0020849(Rreb1),MGP_C57BL6NJ_G0021322(Il6st),MGP_C57BL6NJ_G0028281(Ap1ar),MGP_C57BL6NJ_G0034792(Nrp1)
CC	GO:0042995	cell projection	8	1989	0.3788	0.500637	MGP_C57BL6NJ_G0020259(Gphn),MGP_C57BL6NJ_G0021322(Il6st),MGP_C57BL6NJ_G0022301(Asap1),MGP_C57BL6NJ_G0024426(Ehd3),MGP_C57BL6NJ_G0026118(Dennd1a),MGP_C57BL6NJ_G0026178(Cd302),MGP_C57BL6NJ_G0033450(Prkcb),MGP_C57BL6NJ_G0034792(Nrp1)
BP	GO:0006733	oxidoreduction coenzyme metabolic process	1	135	0.3792	0.500637	MGP_C57BL6NJ_G0025810(Pdss1)
BP	GO:0006865	amino acid transport	1	135	0.3792	0.500637	MGP_C57BL6NJ_G0028496(Slc7a13)
BP	GO:0009266	response to temperature stimulus	1	135	0.3792	0.500637	MGP_C57BL6NJ_G0017366(Cd34)
BP	GO:0045931	positive regulation of mitotic cell cycle	1	135	0.3792	0.500637	MGP_C57BL6NJ_G0022290(Nsmce2)
BP	GO:0072655	establishment of protein localization to mitochondrion	1	135	0.3792	0.500637	MGP_C57BL6NJ_G0030171(Cdkl2)
MF	GO:0016887	ATPase activity	2	368	0.37987	0.501236	MGP_C57BL6NJ_G0026261(Atp5g3),MGP_C57BL6NJ_G0036487(Abcb7)
BP	GO:0001933	negative regulation of protein phosphorylation	2	375	0.38054	0.501236	MGP_C57BL6NJ_G0016617(Pid1),MGP_C57BL6NJ_G0016986(Fam129a)
MF	GO:0008270	zinc ion binding	3	618	0.38061	0.501236	MGP_C57BL6NJ_G0016210(St18),MGP_C57BL6NJ_G0022290(Nsmce2),MGP_C57BL6NJ_G0033450(Prkcb)
BP	GO:0001838	embryonic epithelial tube formation	1	136	0.3814	0.501236	MGP_C57BL6NJ_G0026135(Zeb2)
BP	GO:0032874	positive regulation of stress-activated MAPK cascade	1	136	0.3814	0.501236	MGP_C57BL6NJ_G0026135(Zeb2)
BP	GO:0060402	calcium ion transport into cytosol	1	136	0.3814	0.501236	MGP_C57BL6NJ_G0021900(Adra1a)
BP	GO:0070304	positive regulation of stress-activated protein kinase signaling cascade	1	136	0.3814	0.501236	MGP_C57BL6NJ_G0026135(Zeb2)
BP	GO:1903828	negative regulation of cellular protein localization	1	136	0.3814	0.501236	MGP_C57BL6NJ_G0016617(Pid1)
BP	GO:1905475	regulation of protein localization to membrane	1	136	0.3814	0.501236	MGP_C57BL6NJ_G0016617(Pid1)
MF	GO:0032403	protein complex binding	3	619	0.38159	0.501236	MGP_C57BL6NJ_G0021878(Hmbox1),MGP_C57BL6NJ_G0024409(Myom1),MGP_C57BL6NJ_G0028281(Ap1ar)
CC	GO:0042383	sarcolemma	1	139	0.3825	0.502177	MGP_C57BL6NJ_G0021900(Adra1a)
BP	GO:0071417	cellular response to organonitrogen compound	2	377	0.38305	0.502334	MGP_C57BL6NJ_G0016617(Pid1),MGP_C57BL6NJ_G0033450(Prkcb)
BP	GO:0017148	negative regulation of translation	1	137	0.38359	0.502334	MGP_C57BL6NJ_G0035602(Syncrip)
BP	GO:0035296	regulation of tube diameter	1	137	0.38359	0.502334	MGP_C57BL6NJ_G0021900(Adra1a)
BP	GO:0071897	DNA biosynthetic process	1	137	0.38359	0.502334	MGP_C57BL6NJ_G0021878(Hmbox1)
BP	GO:0097746	regulation of blood vessel diameter	1	137	0.38359	0.502334	MGP_C57BL6NJ_G0021900(Adra1a)
CC	GO:0032991	macromolecular complex	17	4516	0.3842	0.502879	MGP_C57BL6NJ_G0016210(St18),MGP_C57BL6NJ_G0016429(Satb2),MGP_C57BL6NJ_G0016967(Trove2),MGP_C57BL6NJ_G0017366(Cd34),MGP_C57BL6NJ_G0019782(Armc7),MGP_C57BL6NJ_G0020402(Efcab11),MGP_C57BL6NJ_G0021322(Il6st),MGP_C57BL6NJ_G0021878(Hmbox1),MGP_C57BL6NJ_G0021906(Ppp2r2a),MGP_C57BL6NJ_G0022290(Nsmce2),MGP_C57BL6NJ_G0022301(Asap1),MGP_C57BL6NJ_G0024409(Myom1),MGP_C57BL6NJ_G0025810(Pdss1),MGP_C57BL6NJ_G002…
MF	GO:0005509	calcium ion binding	3	622	0.38452	0.503043	MGP_C57BL6NJ_G0020402(Efcab11),MGP_C57BL6NJ_G0024426(Ehd3),MGP_C57BL6NJ_G0028083(Man1a2)
BP	GO:0051668	localization within membrane	1	138	0.38577	0.504169	MGP_C57BL6NJ_G0020259(Gphn)
BP	GO:1903169	regulation of calcium ion transmembrane transport	1	138	0.38577	0.504169	MGP_C57BL6NJ_G0024426(Ehd3)
BP	GO:0070585	protein localization to mitochondrion	1	139	0.38794	0.506322	MGP_C57BL6NJ_G0030171(Cdkl2)
BP	GO:2001257	regulation of cation channel activity	1	139	0.38794	0.506322	MGP_C57BL6NJ_G0024426(Ehd3)
BP	GO:0048732	gland development	2	381	0.38806	0.506322	MGP_C57BL6NJ_G0020849(Rreb1),MGP_C57BL6NJ_G0034792(Nrp1)
BP	GO:0051252	regulation of RNA metabolic process	12	3063	0.3882	0.506322	MGP_C57BL6NJ_G0016210(St18),MGP_C57BL6NJ_G0016429(Satb2),MGP_C57BL6NJ_G0016617(Pid1),MGP_C57BL6NJ_G0020351(Batf),MGP_C57BL6NJ_G0020849(Rreb1),MGP_C57BL6NJ_G0021878(Hmbox1),MGP_C57BL6NJ_G0022517(Mkl1),MGP_C57BL6NJ_G0026135(Zeb2),MGP_C57BL6NJ_G0033450(Prkcb),MGP_C57BL6NJ_G0035015(Fli1),MGP_C57BL6NJ_G0035508(Rfx7),MGP_C57BL6NJ_G0035602(Syncrip)
CC	GO:0099240	intrinsic component of synaptic membrane	1	143	0.3911	0.509848	MGP_C57BL6NJ_G0021900(Adra1a)
BP	GO:0045596	negative regulation of cell differentiation	3	641	0.39225	0.510345	MGP_C57BL6NJ_G0022301(Asap1),MGP_C57BL6NJ_G0028281(Ap1ar),MGP_C57BL6NJ_G0034792(Nrp1)
BP	GO:0010921	regulation of phosphatase activity	1	141	0.39227	0.510345	MGP_C57BL6NJ_G0021906(Ppp2r2a)
BP	GO:0034764	positive regulation of transmembrane transport	1	141	0.39227	0.510345	MGP_C57BL6NJ_G0024426(Ehd3)
BP	GO:0072175	epithelial tube formation	1	141	0.39227	0.510345	MGP_C57BL6NJ_G0026135(Zeb2)
BP	GO:0007399	nervous system development	8	1979	0.39306	0.510919	MGP_C57BL6NJ_G0016429(Satb2),MGP_C57BL6NJ_G0021322(Il6st),MGP_C57BL6NJ_G0021963(Itm2b),MGP_C57BL6NJ_G0022301(Asap1),MGP_C57BL6NJ_G0022517(Mkl1),MGP_C57BL6NJ_G0024539(Rab18),MGP_C57BL6NJ_G0026135(Zeb2),MGP_C57BL6NJ_G0034792(Nrp1)
MF	GO:0005342	organic acid transmembrane transporter activity	1	139	0.39323	0.510919	MGP_C57BL6NJ_G0028496(Slc7a13)
MF	GO:0046914	transition metal ion binding	4	889	0.39335	0.510919	MGP_C57BL6NJ_G0016210(St18),MGP_C57BL6NJ_G0022290(Nsmce2),MGP_C57BL6NJ_G0033450(Prkcb),MGP_C57BL6NJ_G0034287(Large)
CC	GO:0098805	whole membrane	5	1192	0.3935	0.510919	MGP_C57BL6NJ_G0021900(Adra1a),MGP_C57BL6NJ_G0021924(Gm21685),MGP_C57BL6NJ_G0021963(Itm2b),MGP_C57BL6NJ_G0024426(Ehd3),MGP_C57BL6NJ_G0026118(Dennd1a)
BP	GO:0098662	inorganic cation transmembrane transport	3	644	0.39513	0.512741	MGP_C57BL6NJ_G0024426(Ehd3),MGP_C57BL6NJ_G0026261(Atp5g3),MGP_C57BL6NJ_G0034283(Tmem38a)
CC	GO:0005882	intermediate filament	1	145	0.3953	0.512741	MGP_C57BL6NJ_G0034792(Nrp1)
CC	GO:0005635	nuclear envelope	2	394	0.3955	0.512744	MGP_C57BL6NJ_G0021900(Adra1a),MGP_C57BL6NJ_G0034283(Tmem38a)
BP	GO:1902531	regulation of intracellular signal transduction	6	1443	0.39624	0.513347	MGP_C57BL6NJ_G0021322(Il6st),MGP_C57BL6NJ_G0021900(Adra1a),MGP_C57BL6NJ_G0026118(Dennd1a),MGP_C57BL6NJ_G0026135(Zeb2),MGP_C57BL6NJ_G0033450(Prkcb),MGP_C57BL6NJ_G0034792(Nrp1)
BP	GO:0007088	regulation of mitotic nuclear division	1	143	0.39656	0.513347	MGP_C57BL6NJ_G0022290(Nsmce2)
[truncated: 590 more rows]
