# Supplementary material for: LncRNA-mRNA Expression Profiles of Osteoclast After Conditional Knockout HIF-1α
Source: Front Genet. 2022 Jun 21;13:909095. doi: 10.3389/fgene.2022.909095 (PMC9253292; doi:10.3389/fgene.2022.909095)
Supplement: Supplementary file 10 [file Table7.XLSX]

## Sheet: Sheet1
	ctrl			hypoxia			hypoxia+Rankl			Rankl			siNC+Rankl			siHIF+Rankl
hif-1α	0.0485	0.0432	0.0461	0.115	0.119	0.099	0.135	0.109	0.119	0.045	0.049	0.099	0.035	0.0689	0.0799	0.0185	0.0132	0.0161
ctsk	0.148	0.138	0.137	0.147	0.148	0.127	0.247	0.238	0.27	0.226	0.261	0.239	0.247	0.238	0.237	0.197	0.188	0.177
mmp9	0.0156	0.0127	0.0138	0.0166	0.0137	0.0148	0.293	0.276	0.285	0.193	0.206	0.195	0.203	0.186	0.195	0.164	0.126	0.135
trap	0.0146	0.0175	0.0194	0.0156	0.018	0.0192	0.0488	0.0601	0.0434	0.0388	0.0341	0.0424	0.0368	0.0501	0.0436	0.0288	0.0351	0.0334
ctrl	hypoxia	hypoxia+Rankl	Rankl	siNC+Rankl	siHIF+Rankl
0.297304	0.684962	0.714121	0.460721	0.449545	0.187947
0.30542	0.73231	0.81613	0.36623	0.40123	0.21156
0.36564	0.6946	0.7321	0.5461	0.3731	0.17154
ctrl	hypoxia	hypoxia+Rankl	Rankl	siNC+Rankl	siHIF+Rankl
0	0	170	100	95	72
0	0	138	105	94	75
0	0	154	104	98	54
ctrl	hypoxia	hypoxia+Rankl	Rankl	siNC+Rankl	siHIF+Rankl
0	0	2	1	1.1	0.3
0	0	2.1	1.3	1.2	0.2
0	0	2.3	1	1.1	0.4
ctrl	hypoxia	hypoxia+Rankl	Rankl	siNC+Rankl	siHIF+Rankl
1	1.2	3.8	2.5	2.6	1.7
1.1	1	3.7	2.4	2.2	1.5
1	1	3.6	2.3	2.5	1.9
ctrl	hypoxia	hypoxia+Rankl	Rankl	siNC+Rankl	siHIF+Rankl
1.1	2.6	2.7	1.3	1.5	0.3
1	2.8	2.6	1.6	1.3	0.4
1	2.6	3.3	1.4	1.3	0.3
ctrl	hypoxia	hypoxia+Rankl	Rankl	siNC+Rankl	siHIF+Rankl
0	0	2.6	1	1.1	0.3
0	0	2.8	1.3	1	0.2
0	0	2.3	0.8	0.8	0.4
ctrl	hypoxia	hypoxia+Rankl	Rankl	siNC+Rankl	siHIF+Rankl
0	0	3.047	1.874	1.457	0.667
0	0	2.641	1.345	1.721	0.745
0	0	2.812	1.56	1.232	0.945
ctrl	cko
1.45	2.678
1.325	2.742
1.364	2.623
ctrl	cko
0.705	0.943
0.612	0.876
0.728	0.962
Ctrl	Cko
11.848	1
9.3277	1.134
7.714	1.2605
Ctrl	Cko
2.9766	1
2.9572	1.17266
2.13521	1.32831
